# Supplementary material for: Reduction of RAD23A extends lifespan and mitigates pathology in TDP-43 mice
Source: bioRxiv preprint, doi:10.1101/2024.09.10.612226, version 1 (2024-09-14)
Supplement: S2 [file 612226_file09.xlsx]

## Sheet: col_description
Supplemental Figure 2 - Contains differentially expressed genes between Tar4.4;rad23a SCR and WT;rad23a SCR.
GeneID	Gene Identifiers
Mean_normalised_counts,	mean normalised counts, averaged over all samples from both conditions
log2FoldChange	the logarithm (to basis 2) of the fold change (See the note in inputs section)
Std_Error	standard error estimate for the log2 fold change estimate
Wald statistic	Wald statistic
pValue	p value for the statistical significance of this change
Adj_pValue	p value adjusted for multiple testing with the Benjamini-Hochberg procedure which controls false discovery rate (FDR)
WT_rad23a SCR_A1	read counts normalized
WT_rad23a SCR_A2	read counts normalized
WT_rad23a SCR_A3	read counts normalized
WT_rad23a SCR_A4	read counts normalized
WT_rad23a SCR_A5	read counts normalized
WT_rad23a SCR_A6	read counts normalized
WT_rad23a SCR_A7	read counts normalized
WT_rad23a SCR_A8	read counts normalized
WT_rad23a SCR_A9	read counts normalized
WT_rad23a SCR_A10	read counts normalized
Tar4.4_rad23a SCR_C1	read counts normalized
Tar4.4_rad23a SCR_C2	read counts normalized
Tar4.4_rad23a SCR_C3	read counts normalized
Tar4.4_rad23a SCR_C4	read counts normalized
Tar4.4_rad23a SCR_C5	read counts normalized
Tar4.4_rad23a SCR_C6	read counts normalized
Tar4.4_rad23a SCR_C7	read counts normalized
Tar4.4_rad23a SCR_C8	read counts normalized
Tar4.4_rad23a SCR_C9	read counts normalized
Tar4.4_rad23a SCR_C10	read counts normalized

## Sheet: DEG-CvsA
GeneID	Mean_normalised_counts,	log2FoldChange	Std_Error	Wald statistic	pValue	Adj_pValue	Chrom	Start	End	Strand	Transcript	GeneName	GeneID	WT_rad23a SCR_A1	WT_rad23a SCR_A2	WT_rad23a SCR_A3	WT_rad23a SCR_A4	WT_rad23a SCR_A5	WT_rad23a SCR_A6	WT_rad23a SCR_A7	WT_rad23a SCR_A8	WT_rad23a SCR_A9	WT_rad23a SCR_A10	Tar4.4_rad23a SCR_C1	Tar4.4_rad23a SCR_C2	Tar4.4_rad23a SCR_C3	Tar4.4_rad23a SCR_C4	Tar4.4_rad23a SCR_C5	Tar4.4_rad23a SCR_C6	Tar4.4_rad23a SCR_C7	Tar4.4_rad23a SCR_C8	Tar4.4_rad23a SCR_C9	Tar4.4_rad23a SCR_C10	Chrom	Start	End	Strand	Transcript	GeneName		WT_rad23 SCR_A1
ENSMUSG00000075014	77.275	-2.78496	0.296738	-9.38525	6.28e-21	3.6e-19	2	98666546	98667301	-	protein_coding	Gm10800	ENSMUSG00000075014	43.5678	63.1052	53.4798	221.601	480.003	74.9948	128.989	212.965	91.3953	86.7287	4.36953	6.38909	15.9708	6.67583	11.8746	14.4637	7.42288	6.92573	9.04351	5.53546	2	98666546	98667301	-	protein_coding	Gm10800		WT_rad23 SCR_A2
ENSMUSG00000084904	385.703	-2.3793	0.127305	-18.6898	5.99e-78	1.84e-74	X	94442731	94447727	+	lncRNA	Gm14827	ENSMUSG00000084904	619.346	681.943	699.694	668.481	552.944	698.761	741.686	744.153	605.609	524.878	104.869	196.997	171.921	84.8784	105.045	84.6129	110.415	129.28	97.2177	91.3351	X	94442731	94447727	+	lncRNA	Gm14827		WT_rad23 SCR_A3
ENSMUSG00000011267	60.9219	-2.33561	0.180447	-12.9435	2.56e-38	9.6e-36	7	19577286	19580656	+	protein_coding	Zfp296	ENSMUSG00000011267	94.8239	77.3548	119.215	108.502	98.8241	117.849	141.472	132.185	59.0838	91.2341	16.3857	8.51879	21.6076	24.7959	7.30746	13.7406	18.5572	21.9315	19.2175	25.8321	7	19577286	19580656	+	protein_coding	Zfp296		WT_rad23 SCR_A4
ENSMUSG00000062077	27.8898	-2.16665	0.272067	-7.96367	1.67e-15	4.46e-14	5	31116711	31137630	+	protein_coding	Trim54	ENSMUSG00000062077	23.9196	29.517	47.909	56.0899	49.412	78.566	56.1726	57.117	61.8534	28.1587	4.36953	3.19455	19.7287	4.76845	2.7403	10.1246	3.71144	4.61715	15.8261	0	5	31116711	31137630	+	protein_coding	Trim54		WT_rad23 SCR_A5
ENSMUSG00000024124	42.9066	-2.11846	0.203083	-10.4315	1.78e-25	1.77e-23	17	23972125	23980566	-	protein_coding	Prss30	ENSMUSG00000024124	70.9044	72.2656	79.1055	63.4459	44.7061	59.5197	90.5003	78.3319	85.8562	77.718	14.201	6.38909	16.9103	9.5369	10.0478	32.5434	17.6293	13.8515	4.52175	10.1483	17	23972125	23980566	-	protein_coding	Prss30		WT_rad23 SCR_A6
ENSMUSG00000050097	5.75798	-2.10975	0.322086	-6.55027	5.74e-11	7.57e-10	8	104831571	104840093	+	protein_coding	Ces2b	ENSMUSG00000050097	15.3769	6.10696	13.3699	14.7121	2.35295	7.14236	18.7242	4.89574	14.771	11.2635	2.18477	4.25939	0	0	0	0	0	0	0	0	8	104831571	104840093	+	protein_coding	Ces2b		WT_rad23 SCR_A7
ENSMUSG00000058669	3.98823	-2.07863	0.322154	-6.45228	1.1e-10	1.38e-09	12	56611388	56613284	-	protein_coding	Nkx2-9	ENSMUSG00000058669	8.5427	8.14261	11.1416	8.27555	11.7648	2.38079	4.16093	4.89574	7.38548	9.01078	2.18477	0	1.87892	0	0	0	0	0	0	0	12	56611388	56613284	-	protein_coding	Nkx2-9		WT_rad23 SCR_A8
ENSMUSG00000050063	128.837	-2.07515	0.247297	-8.39131	4.81e-17	1.6e-15	7	43824498	43832030	+	protein_coding	Klk6	ENSMUSG00000050063	228.944	142.496	235.088	200.452	262.354	258.315	289.185	225.204	186.483	164.447	71.0049	61.7612	75.1568	47.6845	10.9612	15.9101	35.2587	16.16	20.3479	29.5225	7	43824498	43832030	+	protein_coding	Klk6		WT_rad23 SCR_A9
ENSMUSG00000075015	8.92163	-1.99777	0.326042	-6.12734	8.94e-10	9.68e-09	2	98662236	98664083	+	protein_coding	Gm10801	ENSMUSG00000075015	1.70854	4.0713	8.91329	26.6657	50.5885	9.52315	12.4828	34.2702	8.30866	13.5162	0	0	0	3.81476	0	0	0	2.30858	2.26088	0	2	98662236	98664083	+	protein_coding	Gm10801		WT_rad23 SCR_A10
ENSMUSG00000019874	1771.01	-1.96998	0.204926	-9.61313	7.04e-22	4.58e-20	10	57784880	57788450	+	protein_coding	Fabp7	ENSMUSG00000019874	2170.7	4285.05	3295.69	2572.78	3975.32	2605.77	3100.93	2226.75	2605.23	2307.89	728.619	902.992	1427.98	453.003	503.301	376.781	567.85	469.795	464.61	379.179	10	57784880	57788450	+	protein_coding	Fabp7		Tar4.4_rad23 SCR_C1
ENSMUSG00000019890	300.985	-1.96912	0.266815	-7.38011	1.58e-13	3.08e-12	10	102481755	102490486	-	protein_coding	Nts	ENSMUSG00000019890	207.588	713.496	514.743	434.926	523.532	299.979	474.346	661.741	1013.66	274.829	39.3258	136.301	193.529	53.4067	142.495	113.54	83.5074	32.3201	52.0002	54.432	10	102481755	102490486	-	protein_coding	Nts		Tar4.4_rad23 SCR_C2
ENSMUSG00000027186	30.8253	-1.92442	0.214512	-8.97115	2.93e-19	1.31e-17	2	103411687	103450989	+	protein_coding	Elf5	ENSMUSG00000027186	36.7336	61.0696	42.3381	66.2044	35.2943	52.3773	81.1382	27.7425	46.1592	56.3174	6.5543	23.4267	9.39461	10.4906	7.30746	7.95506	11.1343	17.3143	10.1739	7.38061	2	103411687	103450989	+	protein_coding	Elf5		Tar4.4_rad23 SCR_C3
ENSMUSG00000085813	17.3941	-1.88232	0.25596	-7.35394	1.92e-13	3.7e-12	6	127934688	127944839	-	lncRNA	Gm15870	ENSMUSG00000085813	52.9647	21.3743	13.3699	16.5511	29.4119	38.0926	32.2472	30.1904	19.3869	36.0431	10.9238	3.19455	3.75784	9.5369	1.82686	2.16956	5.56716	5.77144	9.04351	6.45804	6	127934688	127944839	-	lncRNA	Gm15870		Tar4.4_rad23 SCR_C4
ENSMUSG00000044338	104.902	-1.8802	0.176154	-10.6736	1.35e-26	1.55e-24	2	85136224	85139923	+	protein_coding	Aplnr	ENSMUSG00000044338	227.236	235.118	111.416	156.316	125.883	166.655	197.644	154.216	169.866	144.172	58.9887	25.5564	60.1255	40.055	41.1044	60.0246	20.4129	50.7887	29.3914	23.0644	2	85136224	85139923	+	protein_coding	Aplnr		Tar4.4_rad23 SCR_C5
ENSMUSG00000057606	116.19	-1.87612	0.153205	-12.2458	1.77e-34	4.7e-32	14	31523081	31591343	-	protein_coding	Colq	ENSMUSG00000057606	200.753	220.868	180.494	180.223	183.53	170.226	218.449	181.142	143.094	175.71	77.5592	75.6042	43.2152	57.2214	26.4895	35.4362	25.9801	47.3258	46.348	34.1353	14	31523081	31591343	-	protein_coding	Colq		Tar4.4_rad23 SCR_C6
ENSMUSG00000027301	114.746	-1.87553	0.325254	-5.76634	8.1e-09	7.43e-08	2	130576172	130577054	+	protein_coding	Oxt	ENSMUSG00000027301	7.68843	77.3548	150.412	57.0094	217.648	26.1887	99.8624	954.67	595.454	34.9168	0	8.51879	13.1524	20.9812	4.56716	8.67825	1.85572	2.30858	9.04351	4.61288	2	130576172	130577054	+	protein_coding	Oxt		Tar4.4_rad23 SCR_C7
ENSMUSG00000095280	11.7141	-1.8755	0.323228	-5.8024	6.54e-09	6.11e-08	14	19415856	19418930	-	protein_coding	Gm21738	ENSMUSG00000095280	1.70854	9.16043	10.0275	29.4242	68.2357	14.2847	32.2472	31.8223	12.0014	6.75808	0	0	0	0	0.913432	5.06231	2.78358	4.61715	3.39132	1.84515	14	19415856	19418930	-	protein_coding	Gm21738		Tar4.4_rad23 SCR_C8
ENSMUSG00000039492	78.3187	-1.87045	0.178052	-10.5051	8.18e-26	8.45e-24	4	154026638	154042677	-	protein_coding	Ccdc27	ENSMUSG00000039492	124.723	83.4617	148.184	114.938	67.0592	139.276	157.075	147.688	153.249	121.645	34.9562	48.983	27.2444	26.7033	15.5283	24.5884	33.403	24.24	53.1306	20.2967	4	154026638	154042677	-	protein_coding	Ccdc27		Tar4.4_rad23 SCR_C9
ENSMUSG00000008482	28.7484	-1.82899	0.264286	-6.92051	4.5e-12	7.1e-11	17	24715838	24718063	-	protein_coding	Rnf151	ENSMUSG00000008482	56.3818	79.3904	89.1329	40.4583	44.7061	27.3791	36.4081	27.7425	53.5447	23.6533	4.36953	27.6861	7.51568	6.67583	10.9612	8.67825	10.2065	12.6972	0	7.38061	17	24715838	24718063	-	protein_coding	Rnf151		Tar4.4_rad23 SCR_C10
ENSMUSG00000076494	10.9044	-1.80741	0.280057	-6.45372	1.09e-10	1.37e-09	6	41543222	41543271	+	TR_J_gene	Trbj2-3	ENSMUSG00000076494	23.9196	37.6596	18.9407	17.4706	27.059	13.0943	9.3621	4.89574	16.6173	14.6425	3.27715	5.32424	1.87892	5.72214	1.82686	2.16956	2.78358	2.30858	4.52175	4.61288	6	41543222	41543271	+	TR_J_gene	Trbj2-3
ENSMUSG00000021647	752.744	-1.78363	0.145304	-12.2752	1.23e-34	3.35e-32	13	99898488	99901091	-	protein_coding	Cartpt	ENSMUSG00000021647	753.466	1196.96	1314.71	1357.19	1396.48	967.79	1193.15	1254.94	1414.32	994.565	321.161	252.369	589.042	411.04	288.644	308.078	267.224	292.035	176.348	305.373	13	99898488	99901091	-	protein_coding	Cartpt
ENSMUSG00000068686	25.208	-1.77925	0.201233	-8.84176	9.42e-19	3.91e-17	2	104069848	104091187	+	protein_coding	Cd59b	ENSMUSG00000068686	35.0251	52.927	45.6806	38.6193	50.5885	46.4254	44.73	29.3745	36.0042	23.6533	2.18477	12.7782	13.1524	6.67583	10.9612	8.67825	8.35074	17.3143	9.04351	11.9935	2	104069848	104091187	+	protein_coding	Cd59b
ENSMUSG00000024440	37.9638	-1.77216	0.194785	-9.09806	9.2e-20	4.43e-18	18	38267088	38284402	-	protein_coding	Pcdh12	ENSMUSG00000024440	93.9697	65.1409	66.8497	62.5264	27.059	46.4254	62.414	40.7979	61.8534	77.718	24.0324	19.1673	15.0314	9.5369	14.6149	20.2492	12.99	9.2343	15.8261	13.8387	18	38267088	38284402	-	protein_coding	Pcdh12
ENSMUSG00000062028	97.4689	-1.76508	0.228089	-7.73857	1.01e-14	2.42e-13	7	24431921	24452297	-	protein_coding	Irgc1	ENSMUSG00000062028	155.477	39.6952	139.27	134.248	74.118	323.787	278.782	137.897	88.6258	200.49	65.543	34.0752	34.76	42.9161	31.0567	33.9898	37.1144	34.6286	26.0001	36.9031	7	24431921	24452297	-	protein_coding	Irgc1
ENSMUSG00000085338	26.4723	-1.74228	0.238102	-7.31737	2.53e-13	4.78e-12	11	102958299	102964387	-	lncRNA	2410004I01Rik	ENSMUSG00000085338	29.0452	40.713	50.1373	45.9753	34.1178	40.4734	39.5288	57.117	60.9302	29.285	24.0324	15.9727	15.0314	5.72214	9.13432	7.23187	11.1343	0	10.1739	3.69031	11	102958299	102964387	-	lncRNA	2410004I01Rik
ENSMUSG00000060787	59.2832	-1.7337	0.290204	-5.97407	2.31e-09	2.34e-08	11	87913267	87920967	-	protein_coding	Olfr464	ENSMUSG00000060787	181.105	44.7843	108.074	113.099	25.8825	159.513	115.466	96.2829	102.474	48.4329	42.6029	37.2697	22.5471	11.4443	5.48059	7.23187	9.2786	32.3201	11.3044	11.0709	11	87913267	87920967	-	protein_coding	Olfr464
ENSMUSG00000116081	1462.88	-1.72477	0.0878124	-19.6415	6.83e-86	3.29e-82	15	79480226	79482674	-	TEC	Gm49593	ENSMUSG00000116081	2353.51	2262.63	2089.05	2121.3	2521.19	2158.18	2151.2	2410.34	2332.89	2178.36	748.282	796.507	830.483	649.463	469.504	783.212	652.285	683.338	527.915	537.862	15	79480226	79482674	-	TEC	Gm49593
ENSMUSG00000081272	12913.4	-1.70206	0.0698185	-24.3784	2.9e-131	1.96e-127	2	49308154	49309462	+	processed_pseudogene	Gm13509	ENSMUSG00000081272	20144.5	20058.3	19537.9	19825.5	20949.5	20205.7	19891.3	20178.6	17758.4	19637.9	6572.87	7400.7	7112.66	5328.27	5788.42	6203.5	5160.76	5575.21	6273.93	4663.63	2	49308154	49309462	+	processed_pseudogene	Gm13509
ENSMUSG00000048904	5.98397	-1.69925	0.305514	-5.56196	2.67e-08	2.26e-07	13	56250477	56252163	-	protein_coding	Neurog1	ENSMUSG00000048904	8.5427	4.0713	6.68497	12.8731	18.8236	9.52315	6.2414	16.3191	11.0782	9.01078	2.18477	2.1297	3.75784	0	0	2.89275	1.85572	0	0	3.69031	13	56250477	56252163	-	protein_coding	Neurog1
ENSMUSG00000111169	7.15274	-1.68576	0.322259	-5.23108	1.69e-07	1.24e-06	9	61081950	61117839	+	lncRNA	Gm34004	ENSMUSG00000111169	10.2512	6.10696	15.5983	22.9876	8.23534	7.14236	13.523	6.52766	30.4651	6.75808	0	1.06485	0	3.81476	3.65373	0	0	6.92573	0	0	9	61081950	61117839	+	lncRNA	Gm34004
ENSMUSG00000030054	15.0837	-1.67491	0.23537	-7.11605	1.11e-12	1.91e-11	6	87778071	87779768	+	protein_coding	Gp9	ENSMUSG00000030054	17.0854	12.2139	25.6257	22.0681	28.2354	26.1887	26.0058	31.0064	24.0028	27.0323	10.9238	6.38909	3.75784	7.62952	5.48059	2.16956	2.78358	8.08001	11.3044	3.69031	6	87778071	87779768	+	protein_coding	Gp9
ENSMUSG00000042804	2570.03	-1.65752	0.13239	-12.5199	5.81e-36	1.82e-33	4	152274231	152285337	+	protein_coding	Gpr153	ENSMUSG00000042804	4743.76	3446.36	3901.79	3278.04	3555.31	4012.82	3905.03	4221.76	4896.57	3544.61	1793.69	1151.1	1823.49	1097.7	775.504	1293.06	1034.56	1274.33	775.481	875.525	4	152274231	152285337	+	protein_coding	Gpr153
ENSMUSG00000080797	150.3	-1.65175	0.102833	-16.0624	4.68e-58	7.52e-55	16	20545211	20548456	-	transcribed_processed_pseudogene	Gm15760	ENSMUSG00000080797	255.427	253.439	235.088	234.474	222.354	245.221	207.006	210.517	195.715	239.912	64.4506	69.2152	67.6412	61.0362	80.382	86.7825	97.4253	73.8744	59.9132	46.1288	16	20545211	20548456	-	transcribed_processed_pseudogene	Gm15760
ENSMUSG00000097612	7.32746	-1.65173	0.299446	-5.51597	3.47e-08	2.87e-07	1	106090067	106091015	+	processed_pseudogene	Gm26509	ENSMUSG00000097612	10.2512	4.0713	16.7124	12.8731	9.41182	19.0463	17.684	17.1351	7.38548	9.01078	2.18477	6.38909	0	4.76845	0	3.61594	1.85572	2.30858	0	1.84515	1	106090067	106091015	+	processed_pseudogene	Gm26509
ENSMUSG00000032334	228.986	-1.64773	0.163031	-10.1068	5.15e-24	4.3e-22	9	58287737	58313186	-	protein_coding	Loxl1	ENSMUSG00000032334	290.452	390.845	410.012	242.75	356.473	276.171	386.967	248.867	508.675	426.886	169.319	123.522	165.345	62.9436	101.391	68.7028	83.5074	80.8001	93.8264	92.2577	9	58287737	58313186	-	protein_coding	Loxl1
ENSMUSG00000118232	7.97674	-1.63256	0.302069	-5.40457	6.5e-08	5.16e-07	17	26449387	26464157	-	lncRNA	Gm50269	ENSMUSG00000118232	19.6482	10.1783	14.4841	6.43654	8.23534	20.2367	6.2414	20.3989	16.6173	12.3898	0	2.1297	1.87892	1.90738	1.82686	7.23187	0	6.92573	0	2.76773	17	26449387	26464157	-	lncRNA	Gm50269
ENSMUSG00000067724	84.5169	-1.62974	0.306775	-5.31248	1.08e-07	8.29e-07	5	24502756	24527202	-	protein_coding	Gbx1	ENSMUSG00000067724	43.5678	193.387	92.4754	102.985	212.942	59.5197	169.558	192.566	316.652	46.1802	15.2934	9.58364	80.7936	23.8423	9.13432	58.5782	18.5572	21.9315	13.5653	9.22577	5	24502756	24527202	-	protein_coding	Gbx1
ENSMUSG00000059246	5.68094	-1.62882	0.326486	-4.98894	6.07e-07	4.03e-06	9	69757709	69760940	-	protein_coding	Foxb1	ENSMUSG00000059246	5.12562	10.1783	4.45665	5.51704	23.5295	0	8.32186	8.15957	34.1578	6.75808	0	0	2.81838	0	2.7403	0	1.85572	0	0	0	9	69757709	69760940	-	protein_coding	Foxb1
ENSMUSG00000038403	65.8512	-1.61308	0.219103	-7.36221	1.81e-13	3.5e-12	3	96525171	96529210	+	protein_coding	Hjv	ENSMUSG00000038403	149.497	47.8378	85.7905	89.1921	95.2946	116.659	122.747	124.025	92.3185	105.877	58.9887	34.0752	13.1524	20.9812	21.0089	14.4637	14.8458	32.3201	57.6524	20.2967	3	96525171	96529210	+	protein_coding	Hjv
ENSMUSG00000037727	411.882	-1.60941	0.326135	-4.93479	8.02e-07	5.21e-06	2	130580619	130582554	-	protein_coding	Avp	ENSMUSG00000037727	17.0854	109.925	689.666	376.078	1429.42	136.895	927.888	1686.58	2113.17	161.068	15.2934	21.297	88.3093	29.5644	15.5283	287.829	37.1144	33.4743	18.087	43.3611	2	130580619	130582554	-	protein_coding	Avp
ENSMUSG00000104939	30.5204	-1.60783	0.29484	-5.45321	4.95e-08	4e-07	3	143576613	143589170	+	lncRNA	Gm33651	ENSMUSG00000104939	12.814	72.2656	35.6532	57.0094	94.1182	47.6158	62.414	32.6383	72.9316	18.0216	13.1086	36.2049	15.9708	1.90738	5.48059	13.0174	3.71144	1.15429	7.91307	6.45804	3	143576613	143589170	+	lncRNA	Gm33651
ENSMUSG00000113241	15.644	-1.60299	0.265916	-6.02817	1.66e-09	1.72e-08	13	7139126	7175925	-	lncRNA	Gm40663	ENSMUSG00000113241	8.5427	35.6239	34.539	21.1486	21.1766	16.6655	23.9254	30.1904	48.9288	11.2635	2.18477	6.38909	13.1524	9.5369	7.30746	5.06231	5.56716	3.46286	4.52175	3.69031	13	7139126	7175925	-	lncRNA	Gm40663
ENSMUSG00000087094	23.4961	-1.58792	0.250983	-6.32681	2.5e-10	2.94e-09	4	150113878	150119263	-	lncRNA	Gm13093	ENSMUSG00000087094	11.9598	34.6061	40.1098	34.0217	29.4119	38.0926	56.1726	41.6138	62.7766	24.7796	5.46191	2.1297	17.8498	12.398	7.30746	10.8478	17.6293	12.6972	4.52175	5.53546	4	150113878	150119263	-	lncRNA	Gm13093
ENSMUSG00000056380	15.194	-1.58249	0.27177	-5.82289	5.78e-09	5.46e-08	X	71663666	71669257	+	protein_coding	Gpr50	ENSMUSG00000056380	15.3769	48.8556	28.9682	22.0681	14.1177	9.52315	22.8851	21.2149	46.1592	15.7689	4.36953	4.25939	15.0314	3.81476	5.48059	7.23187	3.71144	2.30858	9.04351	3.69031	X	71663666	71669257	+	protein_coding	Gpr50
ENSMUSG00000085222	12.2505	-1.57833	0.24823	-6.35833	2.04e-10	2.44e-09	2	114854092	115043972	+	lncRNA	Gm13974	ENSMUSG00000085222	17.0854	18.3209	16.7124	22.0681	29.4119	13.0943	20.8047	12.2394	26.7724	16.8952	9.83144	6.38909	7.51568	5.72214	1.82686	1.44637	4.6393	3.46286	3.39132	7.38061	2	114854092	115043972	+	lncRNA	Gm13974
ENSMUSG00000108976	19.7144	-1.5777	0.246408	-6.4028	1.53e-10	1.86e-09	2	181657033	181659467	+	protein_coding	Gm29797	ENSMUSG00000108976	29.8994	47.8378	34.539	27.5852	32.9414	23.8079	32.2472	34.2702	29.5419	18.0216	12.0162	18.1024	15.0314	7.62952	0	5.06231	9.2786	6.92573	6.78263	2.76773	2	181657033	181659467	+	protein_coding	Gm29797
ENSMUSG00000079330	99.6381	-1.57241	0.125436	-12.5355	4.77e-36	1.52e-33	1	132191430	132259227	+	protein_coding	Lemd1	ENSMUSG00000079330	184.522	144.531	108.074	146.201	147.06	188.082	152.914	163.191	120.014	154.31	48.0648	41.5291	60.1255	34.3328	65.7671	48.4536	53.8159	47.3258	32.7827	51.6643	1	132191430	132259227	+	protein_coding	Lemd1
ENSMUSG00000040680	64.2965	-1.56793	0.186649	-8.40042	4.45e-17	1.49e-15	17	23741196	23745833	-	protein_coding	Kremen2	ENSMUSG00000040680	86.2812	81.4261	113.644	87.3531	87.0593	122.611	133.15	74.2521	114.475	84.476	29.4943	46.8533	25.3654	18.1201	31.0567	13.7406	22.2686	28.8572	63.3045	22.1418	17	23741196	23745833	-	protein_coding	Kremen2
ENSMUSG00000097184	66.8324	-1.56103	0.188796	-8.26834	1.36e-16	4.26e-15	16	30008666	30021430	+	lncRNA	4632428C04Rik	ENSMUSG00000097184	128.14	109.925	70.1922	86.4336	112.942	94.0411	91.5405	98.7308	112.629	118.266	53.5268	51.1127	25.3654	19.0738	15.5283	19.5261	12.99	41.5544	37.3045	37.8256	16	30008666	30021430	+	lncRNA	4632428C04Rik
ENSMUSG00000111765	53.5632	-1.55435	0.319905	-4.85879	1.18e-06	7.43e-06	9	79444036	79519302	-	lncRNA	Gm10635	ENSMUSG00000111765	151.206	110.943	71.3063	115.858	142.354	153.561	33.2875	88.1234	49.852	6.75808	4.36953	2.1297	26.3049	7.62952	10.9612	5.7855	7.42288	60.023	6.78263	16.6064	9	79444036	79519302	-	lncRNA	Gm10635
ENSMUSG00000071517	11.6057	-1.53639	0.289583	-5.30554	1.12e-07	8.57e-07	6	41442215	41446145	-	protein_coding	Gm10334	ENSMUSG00000071517	22.211	22.3922	18.9407	19.3096	45.8826	14.2847	6.2414	4.89574	16.6173	18.0216	4.36953	8.51879	7.51568	2.86107	3.65373	3.61594	0	2.30858	6.78263	3.69031	6	41442215	41446145	-	protein_coding	Gm10334
ENSMUSG00000108231	36.491	-1.53524	0.189829	-8.08751	6.09e-16	1.74e-14	6	66746016	66746326	+	processed_pseudogene	Gm4045	ENSMUSG00000108231	39.2964	53.9448	60.1647	58.8484	64.7062	49.9965	80.0979	51.4053	64.6229	36.0431	21.8477	25.5564	16.9103	17.1664	12.788	30.3739	16.7015	9.2343	9.04351	11.0709	6	66746016	66746326	+	processed_pseudogene	Gm4045
ENSMUSG00000015843	1069.09	-1.53216	0.250454	-6.11753	9.5e-10	1.02e-08	1	167598383	167639623	+	protein_coding	Rxrg	ENSMUSG00000015843	543.316	1935.91	1207.75	1684.53	2583.54	1589.18	1752.79	1547.05	2404.9	1535.21	320.068	790.118	952.613	339.514	208.262	311.694	735.793	386.686	342.523	210.348	1	167598383	167639623	+	protein_coding	Rxrg
ENSMUSG00000097684	112.371	-1.52707	0.179726	-8.49666	1.95e-17	6.85e-16	13	15459979	15461295	-	lncRNA	Gm26645	ENSMUSG00000097684	98.241	134.353	109.188	116.777	231.766	235.698	182.041	192.566	212.333	197.111	52.4344	58.5667	46.0336	80.11	42.9313	47.7304	78.8681	31.1658	29.3914	70.1158	13	15459979	15461295	-	lncRNA	Gm26645
ENSMUSG00000087075	55.5929	-1.52361	0.309797	-4.91809	8.74e-07	5.65e-06	12	111406808	111412090	+	protein_coding	Lbhd2	ENSMUSG00000087075	39.2964	191.351	80.2196	73.5605	128.236	49.9965	86.3393	108.522	132.015	39.4222	10.9238	6.38909	86.4304	11.4443	8.22089	14.4637	19.4851	9.2343	3.39132	12.9161	12	111406808	111412090	+	protein_coding	Lbhd2
ENSMUSG00000047591	150.712	-1.5232	0.144006	-10.5774	3.79e-26	4.1e-24	15	75745489	75748228	-	protein_coding	Mafa	ENSMUSG00000047591	182.814	267.688	229.517	217.923	240.001	233.317	208.047	197.462	245.567	247.796	100.499	83.0582	99.5828	53.4067	87.6895	103.416	33.403	53.0972	74.6089	55.3546	15	75745489	75748228	-	protein_coding	Mafa
ENSMUSG00000113810	44.6246	-1.52219	0.265991	-5.72269	1.05e-08	9.46e-08	13	8278603	8279289	+	TEC	Gm48259	ENSMUSG00000113810	11.1055	52.927	53.4798	122.294	65.8827	111.897	135.23	56.301	62.7766	34.9168	29.4943	12.7782	27.2444	16.2127	7.30746	5.7855	23.1965	25.3943	12.4348	25.8321	13	8278603	8279289	+	TEC	Gm48259
ENSMUSG00000043144	37.8278	-1.52183	0.21296	-7.14607	8.93e-13	1.56e-11	15	99601399	99605477	+	protein_coding	Aqp6	ENSMUSG00000043144	72.6129	66.1587	34.539	44.1363	80.0004	76.1852	49.9312	48.9574	40.6201	68.7072	20.7553	25.5564	16.9103	29.5644	13.7015	9.40144	15.7736	2.30858	15.8261	24.9096	15	99601399	99605477	+	protein_coding	Aqp6
ENSMUSG00000090041	12.0316	-1.51379	0.278242	-5.44057	5.31e-08	4.28e-07	19	40615885	40616643	+	processed_pseudogene	Gm16027	ENSMUSG00000090041	19.6482	9.16043	16.7124	19.3096	32.9414	23.8079	18.7242	9.79149	18.4637	23.6533	7.64668	5.32424	7.51568	10.4906	4.56716	0	3.71144	5.77144	3.39132	0	19	40615885	40616643	+	processed_pseudogene	Gm16027
ENSMUSG00000104807	34.7869	-1.51076	0.197066	-7.66628	1.77e-14	4.09e-13	5	112675374	112680587	+	lncRNA	Gm42865	ENSMUSG00000104807	50.4019	49.8735	82.448	58.8484	62.3533	58.3293	62.414	39.9819	39.697	27.0323	12.0162	11.7133	18.7892	16.2127	31.0567	15.9101	11.1343	9.2343	22.6088	15.6838	5	112675374	112680587	+	lncRNA	Gm42865
ENSMUSG00000102548	37.7771	-1.5058	0.181027	-8.3181	8.94e-17	2.87e-15	1	166974022	166999728	-	lncRNA	Gm16701	ENSMUSG00000102548	64.0702	63.1052	56.8222	71.7215	55.2944	60.7101	52.0116	59.5649	46.1592	41.6748	20.7553	34.0752	27.2444	16.2127	19.1821	7.95506	11.1343	10.3886	18.087	19.3741	1	166974022	166999728	-	lncRNA	Gm16701
ENSMUSG00000048001	489.997	-1.50397	0.164004	-9.17032	4.72e-20	2.35e-18	4	154960922	154962371	+	protein_coding	Hes5	ENSMUSG00000048001	426.281	658.533	786.598	1122.72	811.769	863.036	949.733	635.631	626.843	507.983	219.569	170.376	262.11	307.088	205.522	428.85	262.584	208.926	134.522	211.27	4	154960922	154962371	+	protein_coding	Hes5
ENSMUSG00000039179	463.524	-1.50367	0.149677	-10.046	9.56e-24	7.83e-22	16	10357947	10395490	-	protein_coding	Tekt5	ENSMUSG00000039179	433.115	600.517	735.347	727.329	797.651	704.713	721.922	789.031	868.717	584.574	194.444	261.953	440.607	256.543	186.34	227.804	256.089	169.68	172.957	141.154	16	10357947	10395490	-	protein_coding	Tekt5
ENSMUSG00000107272	306.789	-1.50236	0.134487	-11.1711	5.65e-29	8.44e-27	5	73380559	73391102	+	transcribed_processed_pseudogene	Gm34583	ENSMUSG00000107272	426.281	506.877	411.126	444.121	556.474	460.682	474.346	558.931	350.81	403.232	146.379	157.598	202.923	238.423	93.1701	197.43	133.612	141.977	134.522	96.8706	5	73380559	73391102	+	transcribed_processed_pseudogene	Gm34583
ENSMUSG00000045573	9825.95	-1.5021	0.223927	-6.70802	1.97e-11	2.81e-10	4	4133530	4138819	-	protein_coding	Penk	ENSMUSG00000045573	5297.33	15956.5	11674.2	16319.4	21881.3	12726.5	17727.6	15243.7	21489.9	12906.8	3327.4	6874.66	8348.99	2879.19	2726.59	6022.7	6073.77	3849.55	3003.57	2189.27	4	4133530	4138819	-	protein_coding	Penk
ENSMUSG00000020098	194.196	-1.49719	0.162436	-9.21711	3.05e-20	1.57e-18	10	61089330	61094324	+	protein_coding	Pcbd1	ENSMUSG00000020098	177.688	262.599	330.906	250.106	372.943	216.652	319.351	377.788	366.504	247.796	138.733	129.912	125.888	97.2764	86.776	109.924	42.6816	64.6401	83.6524	82.1093	10	61089330	61094324	+	protein_coding	Pcbd1
ENSMUSG00000062545	67.2547	-1.49592	0.206094	-7.25845	3.92e-13	7.16e-12	4	128615442	128618619	-	protein_coding	Tlr12	ENSMUSG00000062545	47.8391	111.961	141.499	93.7896	110.589	133.324	108.184	88.9393	123.707	65.3281	54.6191	53.2424	39.4573	26.7033	23.7492	11.571	18.5572	27.7029	23.7392	40.5934	4	128615442	128618619	-	protein_coding	Tlr12
ENSMUSG00000109907	7.80631	-1.49474	0.288033	-5.18946	2.11e-07	1.53e-06	8	49818936	49949006	+	lncRNA	Gm45321	ENSMUSG00000109907	4.27135	7.12478	15.5983	12.8731	7.05886	14.2847	19.7644	11.4234	22.1564	11.2635	3.27715	0	3.75784	4.76845	2.7403	2.16956	4.6393	5.77144	2.26088	0.922577	8	49818936	49949006	+	lncRNA	Gm45321
ENSMUSG00000078601	30.7894	-1.49247	0.171716	-8.69149	3.58e-18	1.38e-16	3	108361550	108362256	+	lncRNA	Gm12525	ENSMUSG00000078601	44.422	48.8556	35.6532	62.5264	47.0591	52.3773	53.0519	48.1415	42.4665	29.285	18.5705	10.6485	14.0919	20.0275	17.3552	11.571	12.99	9.2343	18.087	19.3741	3	108361550	108362256	+	lncRNA	Gm12525
ENSMUSG00000090486	21.2507	-1.48494	0.258583	-5.74261	9.32e-09	8.48e-08	1	78497025	78512158	-	protein_coding	BC035947	ENSMUSG00000090486	19.6482	32.5704	26.7399	39.5388	35.2943	9.52315	35.3679	45.6936	64.6229	22.5269	17.4781	14.9079	8.45515	5.72214	10.0478	5.7855	6.49502	6.92573	15.8261	1.84515	1	78497025	78512158	-	protein_coding	BC035947
ENSMUSG00000028778	159.787	-1.48213	0.148951	-9.95046	2.51e-23	1.97e-21	4	130130216	130139359	-	protein_coding	Hcrtr1	ENSMUSG00000028778	223.819	275.831	173.809	226.198	221.178	244.031	264.219	235.812	228.027	295.103	127.809	117.133	64.8228	85.8321	65.7671	79.5506	43.6094	110.812	54.261	58.1223	4	130130216	130139359	-	protein_coding	Hcrtr1
ENSMUSG00000111504	47.2859	-1.47587	0.267493	-5.51741	3.44e-08	2.85e-07	9	40606415	40616386	-	lncRNA	Gm48284	ENSMUSG00000111504	58.0903	18.3209	86.9046	44.1363	70.5886	113.087	114.426	109.338	91.3953	38.2958	13.1086	6.38909	22.5471	35.2865	39.2776	29.6507	21.3408	21.9315	7.91307	3.69031	9	40606415	40616386	-	lncRNA	Gm48284
ENSMUSG00000102308	2.21166	-1.47574	0.31677	-4.65871	3.18e-06	1.86e-05	3	92532504	92534511	-	protein_coding	2310046K23Rik	ENSMUSG00000102308	6.83416	0	4.45665	5.51704	7.05886	7.14236	2.08047	6.52766	4.61592	0	0	0	0	0	0	0	0	0	0	0	3	92532504	92534511	-	protein_coding	2310046K23Rik
ENSMUSG00000080806	33.7063	-1.47134	0.264192	-5.56921	2.56e-08	2.17e-07	4	137219759	137220399	-	processed_pseudogene	Gm13005	ENSMUSG00000080806	23.9196	29.517	75.763	45.0558	49.412	108.326	63.4542	67.7244	52.6215	12.3898	14.201	10.6485	3.75784	20.0275	12.788	19.5261	10.2065	31.1658	18.087	5.53546	4	137219759	137220399	-	processed_pseudogene	Gm13005
ENSMUSG00000110446	647.775	-1.46963	0.107476	-13.674	1.45e-42	7.21e-40	8	72515357	72516420	+	processed_pseudogene	Gm18646	ENSMUSG00000110446	1227.59	1087.04	924.754	844.106	1124.71	770.185	726.083	933.455	998.886	952.89	388.888	475.987	352.298	260.357	332.489	329.773	269.079	278.183	379.827	298.915	8	72515357	72516420	+	processed_pseudogene	Gm18646
ENSMUSG00000030270	3872.36	-1.46399	0.150839	-9.70563	2.85e-22	1.94e-20	6	113282306	113305627	+	protein_coding	Cpne9	ENSMUSG00000030270	8170.24	4191.41	5846.01	4879.82	3847.08	6897.14	6395.35	6471.36	5292.62	5754.51	3401.68	2270.26	1707.94	1691.85	1110.73	1513.63	1381.58	2495.57	2206.62	1921.73	6	113282306	113305627	+	protein_coding	Cpne9
ENSMUSG00000110396	24.5426	-1.44673	0.300507	-4.8143	1.48e-06	9.14e-06	7	136167085	136173296	-	lncRNA	Gm36737	ENSMUSG00000110396	6.83416	40.713	37.8815	37.6997	40.0002	17.8559	42.6495	55.4851	94.1649	24.7796	0	23.4267	16.9103	7.62952	1.82686	11.571	16.7015	6.92573	2.26088	5.53546	7	136167085	136173296	-	lncRNA	Gm36737
ENSMUSG00000086003	108.619	-1.43716	0.142085	-10.1147	4.75e-24	3.98e-22	11	94133484	94155776	+	lncRNA	B230206L02Rik	ENSMUSG00000086003	141.809	128.246	201.663	161.833	182.354	149.99	238.213	151.768	129.246	122.772	63.3582	67.0855	62.9439	76.2952	28.3164	51.3463	51.9602	60.023	54.261	48.8966	11	94133484	94155776	+	lncRNA	B230206L02Rik
ENSMUSG00000064179	279.79	-1.43056	0.142911	-10.0101	1.38e-23	1.12e-21	7	4504569	4516382	-	protein_coding	Tnnt1	ENSMUSG00000064179	263.115	402.041	470.176	478.143	454.12	344.024	526.358	453.672	418.203	331.146	128.901	74.5394	225.471	188.831	126.967	180.797	136.395	145.44	126.609	120.858	7	4504569	4516382	-	protein_coding	Tnnt1
ENSMUSG00000086129	27.4472	-1.42924	0.214333	-6.66833	2.59e-11	3.62e-10	2	58705768	58735396	+	lncRNA	Gm13558	ENSMUSG00000086129	26.4824	21.3743	36.7673	49.6533	63.5298	54.7581	29.1265	51.4053	29.5419	51.812	14.201	19.1673	20.6681	7.62952	10.0478	7.23187	14.8458	11.5429	18.087	11.0709	2	58705768	58735396	+	lncRNA	Gm13558
ENSMUSG00000034438	7.12965	-1.42543	0.3183	-4.47828	7.52e-06	4.05e-05	5	105014149	105139540	-	protein_coding	Gbp8	ENSMUSG00000034438	1.70854	10.1783	24.5116	14.7121	8.23534	11.9039	14.5633	21.2149	3.69274	9.01078	2.18477	8.51879	1.87892	0	0.913432	2.89275	1.85572	4.61715	0	0	5	105014149	105139540	-	protein_coding	Gbp8
ENSMUSG00000028072	168.183	-1.42067	0.315023	-4.50973	6.49e-06	3.54e-05	3	87778243	87795162	-	protein_coding	Ntrk1	ENSMUSG00000028072	61.5074	380.667	159.325	291.483	447.061	177.369	303.748	243.971	578.837	144.172	19.6629	46.8533	174.74	32.4255	9.13432	148.253	77.9402	13.8515	30.5218	22.1418	3	87778243	87795162	-	protein_coding	Ntrk1
ENSMUSG00000109957	29.7631	-1.41698	0.245841	-5.76382	8.22e-09	7.54e-08	8	122339170	122343100	+	lncRNA	Gm45353	ENSMUSG00000109957	52.9647	52.927	59.0506	49.6533	23.5295	42.8542	43.6898	52.2213	44.3129	33.7904	26.2172	29.8158	6.57622	8.58321	0	15.1869	11.1343	11.5429	19.2175	11.9935	8	122339170	122343100	+	lncRNA	Gm45353
ENSMUSG00000002100	180.978	-1.41613	0.1844	-7.67966	1.6e-14	3.72e-13	2	91118143	91136516	+	protein_coding	Mybpc3	ENSMUSG00000002100	338.291	181.173	247.344	282.288	254.119	272.6	262.139	314.959	199.408	343.536	163.857	143.755	79.8542	57.2214	56.6328	39.0521	66.8059	139.669	93.8264	83.0319	2	91118143	91136516	+	protein_coding	Mybpc3
ENSMUSG00000030048	49.6548	-1.41519	0.263026	-5.3804	7.43e-08	5.85e-07	6	87383255	87388935	-	protein_coding	Gkn3	ENSMUSG00000030048	80.3014	85.4974	79.1055	37.6997	74.118	45.235	69.6956	21.2149	149.556	126.151	66.6353	21.297	27.2444	20.0275	19.1821	7.95506	12.0622	20.7772	9.04351	20.2967	6	87383255	87388935	-	protein_coding	Gkn3
ENSMUSG00000090889	12.5903	-1.41439	0.318367	-4.44262	8.89e-06	4.71e-05	14	54976932	54977025	+	protein_coding	Gm17428	ENSMUSG00000090889	0.85427	21.3743	21.1691	33.1022	22.3531	26.1887	28.0863	5.7117	33.2347	19.1479	1.09238	7.45394	4.6973	9.5369	0	5.06231	9.2786	3.46286	0	0	14	54976932	54977025	+	protein_coding	Gm17428
ENSMUSG00000019787	52.2722	-1.41313	0.29238	-4.83321	1.34e-06	8.38e-06	10	33080553	33476709	+	protein_coding	Trdn	ENSMUSG00000019787	41.0049	138.424	127.014	128.731	74.118	69.0429	70.7358	63.6447	83.0866	37.1695	10.9238	13.843	80.7936	10.4906	13.7015	29.6507	25.9801	9.2343	6.78263	11.0709	10	33080553	33476709	+	protein_coding	Trdn
ENSMUSG00000046958	9.05607	-1.40903	0.30964	-4.55054	5.35e-06	2.97e-05	7	29558578	29582169	+	transcribed_unitary_pseudogene	4930432E11Rik	ENSMUSG00000046958	6.83416	16.2852	15.5983	12.8731	16.4707	14.2847	27.0461	8.15957	26.7724	4.50539	3.27715	2.1297	1.87892	9.5369	0	5.7855	7.42288	0	2.26088	0	7	29558578	29582169	+	transcribed_unitary_pseudogene	4930432E11Rik
ENSMUSG00000103200	11.6488	-1.40398	0.244177	-5.74985	8.93e-09	8.15e-08	1	160726041	160726681	-	lncRNA	Gm37328	ENSMUSG00000103200	16.2311	20.3565	17.8266	28.5047	22.3531	11.9039	10.4023	12.2394	21.2333	16.8952	3.27715	6.38909	1.87892	5.72214	3.65373	5.7855	6.49502	8.08001	4.52175	9.22577	1	160726041	160726681	-	lncRNA	Gm37328
ENSMUSG00000035258	1638.43	-1.40319	0.272698	-5.14557	2.67e-07	1.89e-06	16	56477877	56690135	+	protein_coding	Abi3bp	ENSMUSG00000035258	2381.7	2993.43	4243.84	2011.88	2194.13	2151.04	2156.4	3036.99	1775.28	2565.82	480.648	464.274	1571.72	1225.49	160.764	1303.18	1132.92	345.132	316.523	257.399	16	56477877	56690135	+	protein_coding	Abi3bp
ENSMUSG00000081849	10.6704	-1.40078	0.296635	-4.72223	2.33e-06	1.39e-05	5	73013527	73017236	+	unitary_pseudogene	Gm15847	ENSMUSG00000081849	0.85427	21.3743	8.91329	14.7121	27.059	9.52315	19.7644	15.5032	34.1578	19.1479	0	2.1297	3.75784	3.81476	3.65373	7.23187	5.56716	5.77144	6.78263	3.69031	5	73013527	73017236	+	unitary_pseudogene	Gm15847
ENSMUSG00000072591	258.329	-1.39612	0.213304	-6.54522	5.94e-11	7.81e-10	5	128579105	128600693	-	lncRNA	Fzd10os	ENSMUSG00000072591	351.105	231.047	358.76	438.604	374.12	522.583	469.145	400.635	345.271	385.211	196.629	224.683	170.982	132.563	62.1134	52.0695	66.8059	169.68	88.1742	126.393	5	128579105	128600693	-	lncRNA	Fzd10os
ENSMUSG00000041377	52.2581	-1.39466	0.232544	-5.99739	2.01e-09	2.05e-08	6	120093349	120200339	+	protein_coding	Ninj2	ENSMUSG00000041377	41.8592	87.533	105.845	96.5481	89.4122	83.3276	82.1784	39.9819	111.705	51.812	32.7715	51.1127	30.0627	6.67583	17.3552	8.67825	29.6915	21.9315	37.3045	19.3741	6	120093349	120200339	+	protein_coding	Ninj2
ENSMUSG00000035513	3797.57	-1.39174	0.0900836	-15.4494	7.62e-54	8.57e-51	2	29194540	29253005	-	protein_coding	Ntng2	ENSMUSG00000035513	5457.93	4433.65	5502.84	6189.19	5117.67	6363.85	6103.05	5639.9	5233.54	5238.64	2566.01	2251.09	2167.34	2414.74	2163.01	2093.63	1604.27	2178.14	1782.7	1450.29	2	29194540	29253005	-	protein_coding	Ntng2
ENSMUSG00000046500	34.6948	-1.39075	0.205787	-6.75819	1.4e-11	2.03e-10	6	96831202	97060413	-	protein_coding	Tafa4	ENSMUSG00000046500	27.3366	45.8022	44.5665	62.5264	78.824	64.2813	58.253	54.6691	60.9302	21.4006	31.6791	21.297	18.7892	9.5369	12.788	17.3565	16.7015	11.5429	18.087	17.529	6	96831202	97060413	-	protein_coding	Tafa4
ENSMUSG00000063821	10.2469	-1.39059	0.261088	-5.32612	1e-07	7.75e-07	14	21676536	21714576	-	protein_coding	Dupd1	ENSMUSG00000063821	18.7939	9.16043	18.9407	7.35605	22.3531	20.2367	15.6035	14.6872	15.6941	15.7689	6.5543	4.25939	7.51568	5.72214	1.82686	4.33912	4.6393	0	2.26088	9.22577	14	21676536	21714576	-	protein_coding	Dupd1
ENSMUSG00000038676	58.7674	-1.38902	0.21296	-6.52247	6.92e-11	8.96e-10	5	31138062	31138829	-	protein_coding	Ucn	ENSMUSG00000038676	69.1958	47.8378	76.8772	89.1921	97.6476	153.561	97.7819	79.9638	106.166	63.0754	26.2172	27.6861	40.3968	61.0362	10.0478	31.0971	16.7015	17.3143	39.5653	23.987	5	31138062	31138829	-	protein_coding	Ucn
ENSMUSG00000026247	887.195	-1.38744	0.283145	-4.9001	9.58e-07	6.13e-06	1	87147654	87156521	-	protein_coding	Ecel1	ENSMUSG00000026247	463.014	1813.77	918.069	1135.59	1702.36	713.046	1584.27	1686.58	3091.75	796.327	171.504	276.861	1022.13	230.793	299.606	760.07	460.218	215.852	224.957	177.135	1	87147654	87156521	-	protein_coding	Ecel1
ENSMUSG00000022841	9377.35	-1.38722	0.0561989	-24.6841	1.59e-134	1.78e-130	16	20535477	20544909	+	protein_coding	Ap2m1	ENSMUSG00000022841	13893.8	13892.3	13716.4	13783.4	14284.8	13865.7	13623.9	13189.1	12534.1	13162.5	5310.07	5940.79	5696.89	5265.32	4843.93	5336.4	4482.49	4805.3	5684.97	4234.63	16	20535477	20544909	+	protein_coding	Ap2m1
ENSMUSG00000076497	13.4649	-1.38702	0.282508	-4.90966	9.12e-07	5.87e-06	6	41543809	41543856	+	TR_J_gene	Trbj2-7	ENSMUSG00000076497	28.1909	35.6239	23.3974	20.2291	32.9414	8.33276	12.4828	12.2394	11.0782	25.906	18.5705	6.38909	4.6973	4.76845	4.56716	3.61594	0	6.92573	5.65219	3.69031	6	41543809	41543856	+	TR_J_gene	Trbj2-7
ENSMUSG00000047586	25.2707	-1.38656	0.229093	-6.0524	1.43e-09	1.49e-08	7	28543595	28547254	-	protein_coding	Nccrp1	ENSMUSG00000047586	30.7537	37.6596	31.1965	44.1363	51.765	46.4254	36.4081	27.7425	36.0042	38.2958	9.83144	22.3618	24.426	9.5369	3.65373	2.89275	7.42288	16.16	15.8261	12.9161	7	28543595	28547254	-	protein_coding	Nccrp1
ENSMUSG00000062329	26.5079	-1.38585	0.279249	-4.96278	6.95e-07	4.57e-06	5	37735518	37739820	+	protein_coding	Cytl1	ENSMUSG00000062329	11.9598	16.2852	83.5621	39.5388	44.7061	49.9965	39.5288	42.4298	66.4693	20.2742	2.18477	12.7782	30.0627	15.259	3.65373	18.8029	7.42288	9.2343	6.78263	9.22577	5	37735518	37739820	+	protein_coding	Cytl1
ENSMUSG00000115169	27.8924	-1.38338	0.220115	-6.2848	3.28e-10	3.78e-09	15	64396378	64433598	+	lncRNA	Gm30563	ENSMUSG00000115169	47.8391	35.6239	46.7948	45.0558	40.0002	53.5677	38.4886	42.4298	20.3101	47.3066	22.94	29.8158	8.45515	13.3517	7.30746	9.40144	5.56716	21.9315	12.4348	9.22577	15	64396378	64433598	+	lncRNA	Gm30563
ENSMUSG00000110050	43.4309	-1.3833	0.211074	-6.55361	5.62e-11	7.42e-10	8	50389091	50390097	+	TEC	Gm45259	ENSMUSG00000110050	25.6281	74.3013	62.3931	106.663	58.8238	71.4236	62.414	57.117	89.5489	41.6748	18.5705	17.0376	32.8811	28.6107	14.6149	18.8029	38.0423	17.3143	22.6088	10.1483	8	50389091	50390097	+	TEC	Gm45259
ENSMUSG00000025488	15.939	-1.38289	0.246802	-5.60323	2.1e-08	1.81e-07	7	140898944	140900446	-	protein_coding	Cox8b	ENSMUSG00000025488	11.9598	24.4278	22.2832	10.1146	30.5884	38.0926	33.2875	28.5585	18.4637	25.906	4.36953	4.25939	13.1524	3.81476	9.13432	6.50869	14.8458	5.77144	6.78263	6.45804	7	140898944	140900446	-	protein_coding	Cox8b
ENSMUSG00000022715	259.872	-1.38039	0.168956	-8.17015	3.08e-16	9.14e-15	16	8409274	8425136	-	protein_coding	Tmem114	ENSMUSG00000022715	572.361	320.615	387.728	394.468	309.413	376.164	441.059	395.739	312.96	317.63	216.292	194.867	82.6725	163.081	109.612	78.1042	62.1666	168.526	153.74	140.232	16	8409274	8425136	-	protein_coding	Tmem114
ENSMUSG00000115456	34.4079	-1.38023	0.200902	-6.87017	6.41e-12	9.86e-11	15	38312292	38343139	+	lncRNA	Gm35248	ENSMUSG00000115456	56.3818	41.7309	40.1098	79.997	52.9415	61.9005	36.4081	44.8776	32.3115	66.4545	24.0324	5.32424	27.2444	25.7496	19.1821	16.6333	17.6293	16.16	10.1739	12.9161	15	38312292	38343139	+	lncRNA	Gm35248
ENSMUSG00000050424	47.091	-1.37808	0.23892	-5.76796	8.02e-09	7.38e-08	X	73033980	73037103	-	protein_coding	Pnma5	ENSMUSG00000050424	76.03	32.5704	99.1604	43.2168	56.4709	83.3276	70.7358	51.4053	90.4721	109.256	71.0049	8.51879	20.6681	21.9349	12.788	19.5261	21.3408	19.6229	18.087	15.6838	X	73033980	73037103	-	protein_coding	Pnma5
ENSMUSG00000110447	190.355	-1.3755	0.123716	-11.1183	1.02e-28	1.48e-26	8	95593421	95621509	+	lncRNA	Gm31518	ENSMUSG00000110447	234.924	220.868	350.961	294.242	215.295	328.549	345.357	261.922	229.873	296.229	72.0973	115.004	101.462	119.211	66.6805	122.942	120.622	83.1087	109.653	118.09	8	95593421	95621509	+	lncRNA	Gm31518
ENSMUSG00000096225	147.593	-1.37262	0.320094	-4.28816	1.8e-05	9.02e-05	3	154306293	154330659	-	protein_coding	Lhx8	ENSMUSG00000096225	44.422	269.724	183.837	187.579	361.178	104.755	251.736	310.88	625.919	121.645	15.2934	27.6861	185.074	15.259	11.8746	113.54	61.2387	23.0858	11.3044	25.8321	3	154306293	154330659	-	protein_coding	Lhx8
ENSMUSG00000012405	1948.94	-1.37191	0.0813981	-16.8543	9.76e-64	1.94e-60	14	18267822	18271391	-	protein_coding	Rpl15	ENSMUSG00000012405	2565.37	2881.47	2939.16	2907.48	3015.31	2804.57	2777.42	3001.09	2702.16	2640.16	1066.17	1310.83	1524.74	1028.08	1011.17	1019.69	915.798	951.133	1053.57	863.532	14	18267822	18271391	-	protein_coding	Rpl15
ENSMUSG00000072662	27.3123	-1.37149	0.21503	-6.37811	1.79e-10	2.16e-09	6	147075059	147087032	-	protein_coding	Mansc4	ENSMUSG00000072662	28.1909	53.9448	40.1098	43.2168	31.7649	36.9022	23.9254	39.9819	52.6215	57.4437	9.83144	23.4267	22.5471	5.72214	14.6149	13.7406	14.8458	16.16	13.5653	3.69031	6	147075059	147087032	-	protein_coding	Mansc4
ENSMUSG00000030769	50.5846	-1.37056	0.171347	-7.99872	1.26e-15	3.42e-14	7	123214779	123273253	+	protein_coding	Slc5a11	ENSMUSG00000030769	64.0702	107.89	77.9913	56.0899	70.5886	63.0909	90.5003	50.5893	79.3939	85.6024	17.4781	37.2697	34.76	38.1476	14.6149	24.5884	34.3308	20.7772	18.087	25.8321	7	123214779	123273253	+	protein_coding	Slc5a11
ENSMUSG00000031239	2395.78	-1.36775	0.115283	-11.8643	1.81e-32	3.9e-30	X	107397098	107403376	-	protein_coding	Itm2a	ENSMUSG00000031239	3001.05	3486.05	4250.53	3640.32	3641.2	3497.38	3591.92	3098.19	3651.2	2974.68	1930.24	1703.76	1559.5	1251.24	938.095	906.877	1078.17	1480.95	1087.48	1146.76	X	107397098	107403376	-	protein_coding	Itm2a
ENSMUSG00000097623	5.55668	-1.36592	0.325688	-4.19395	2.74e-05	0.000132752	9	69758739	69830845	+	lncRNA	B230323A14Rik	ENSMUSG00000097623	4.27135	10.1783	2.22832	10.1146	7.05886	7.14236	8.32186	25.2947	19.3869	2.25269	0	0	3.75784	0	0	2.89275	3.71144	0	4.52175	0	9	69758739	69830845	+	lncRNA	B230323A14Rik
ENSMUSG00000083827	11.0655	-1.36214	0.312045	-4.3652	1.27e-05	6.54e-05	16	43184572	43185728	+	processed_pseudogene	Gm15712	ENSMUSG00000083827	1.70854	16.2852	15.5983	34.0217	25.8825	17.8559	33.2875	13.0553	15.6941	6.75808	1.09238	8.51879	1.87892	7.62952	5.48059	0	7.42288	4.61715	4.52175	0	16	43184572	43185728	+	processed_pseudogene	Gm15712
ENSMUSG00000024749	13.2705	-1.35952	0.272749	-4.98453	6.21e-07	4.11e-06	19	20783457	20954202	-	protein_coding	Tmc1	ENSMUSG00000024749	28.1909	32.5704	15.5983	19.3096	11.7648	19.0463	40.5691	7.34361	13.8478	15.7689	9.83144	6.38909	5.63676	1.90738	6.39402	1.44637	5.56716	9.2343	11.3044	3.69031	19	20783457	20954202	-	protein_coding	Tmc1
ENSMUSG00000022595	19.0356	-1.35778	0.308754	-4.39762	1.09e-05	5.7e-05	15	74732246	74734329	-	protein_coding	Lypd2	ENSMUSG00000022595	24.7738	14.2496	46.7948	43.2168	25.8825	32.1406	22.8851	35.9021	36.0042	24.7796	21.8477	14.9079	9.39461	0	1.82686	0	5.56716	9.2343	11.3044	0	15	74732246	74734329	-	protein_coding	Lypd2
ENSMUSG00000029359	3225.36	-1.35638	0.0885322	-15.3208	5.56e-53	6.05e-50	5	118027742	118061878	+	protein_coding	Tesc	ENSMUSG00000029359	3543.51	3932.88	4894.51	5099.58	5088.26	4846.09	5152.27	5049.96	4903.04	4108.91	2015.45	2084.97	1821.61	1770.05	1511.73	1849.19	1463.23	2144.67	1876.53	1350.65	5	118027742	118061878	+	protein_coding	Tesc
ENSMUSG00000039103	707.285	-1.35554	0.188901	-7.1759	7.18e-13	1.27e-11	3	152236981	152266350	-	protein_coding	Nexn	ENSMUSG00000039103	410.904	879.402	747.603	1131.91	1485.89	1065.4	1199.39	1152.95	1385.7	978.796	338.639	612.288	578.708	288.014	214.656	319.649	410.114	303.578	321.044	321.057	3	152236981	152266350	-	protein_coding	Nexn
ENSMUSG00000029219	281.477	-1.35546	0.303279	-4.46936	7.85e-06	4.21e-05	5	73006882	73012955	+	protein_coding	Slc10a4	ENSMUSG00000029219	88.8441	566.929	308.623	438.604	661.18	228.556	621.019	437.353	868.717	277.081	53.5268	75.6042	329.751	60.0825	31.0567	257.455	154.025	71.5658	49.7393	49.8191	5	73006882	73012955	+	protein_coding	Slc10a4
ENSMUSG00000108129	14.2172	-1.35542	0.280436	-4.83325	1.34e-06	8.38e-06	6	125265475	125287286	+	lncRNA	4930417O13Rik	ENSMUSG00000108129	7.68843	28.4991	22.2832	31.2632	17.6472	16.6655	20.8047	39.9819	27.6955	9.01078	2.18477	6.38909	11.2735	13.3517	4.56716	10.8478	4.6393	0	6.78263	2.76773	6	125265475	125287286	+	lncRNA	4930417O13Rik
ENSMUSG00000020178	3353.64	-1.35536	0.287044	-4.7218	2.34e-06	1.39e-05	10	75316876	75334784	+	protein_coding	Adora2a	ENSMUSG00000020178	1172.06	5165.47	3341.37	5320.26	8436.52	4284.23	5707.76	4545.7	9637.13	4818.51	977.683	2609.94	3579.34	760.091	555.367	1887.52	2232.43	811.464	698.611	531.404	10	75316876	75334784	+	protein_coding	Adora2a
ENSMUSG00000087461	44.2605	-1.35512	0.213987	-6.33274	2.41e-10	2.84e-09	2	34018288	34107735	-	lncRNA	C230014O12Rik	ENSMUSG00000087461	30.7537	79.3904	55.7081	77.2385	94.1182	40.4734	74.8968	84.8595	75.7012	46.1802	16.3857	46.8533	31.9417	15.259	18.2686	18.8029	34.3308	15.0057	12.4348	16.6064	2	34018288	34107735	-	lncRNA	C230014O12Rik
ENSMUSG00000079605	28.7595	-1.35442	0.180562	-7.50113	6.33e-14	1.32e-12	17	26973166	27008376	+	protein_coding	Zbtb9	ENSMUSG00000079605	29.8994	53.9448	51.2514	49.6533	31.7649	39.283	56.1726	36.7181	46.1592	28.1587	15.2934	12.7782	12.213	16.2127	21.0089	15.9101	8.35074	19.6229	16.9566	13.8387	17	26973166	27008376	+	protein_coding	Zbtb9
ENSMUSG00000111655	4.08442	-1.35367	0.324584	-4.17047	3.04e-05	0.000145632	9	31463905	31515809	+	lncRNA	4930434F21Rik	ENSMUSG00000111655	4.27135	2.03565	1.11416	5.51704	4.70591	14.2847	6.2414	9.79149	12.9246	9.01078	0	3.19455	0	0	0	1.44637	3.71144	2.30858	1.13044	0	9	31463905	31515809	+	lncRNA	4930434F21Rik
ENSMUSG00000051906	21.3705	-1.35336	0.291414	-4.64412	3.42e-06	1.98e-05	8	4102786	4105835	-	protein_coding	Cd209f	ENSMUSG00000051906	17.0854	46.82	30.0824	34.0217	43.5296	27.3791	22.8851	14.6872	57.2375	41.6748	32.7715	15.9727	15.0314	1.90738	5.48059	4.33912	5.56716	2.30858	6.78263	1.84515	8	4102786	4105835	-	protein_coding	Cd209f
ENSMUSG00000108478	22.1709	-1.35305	0.263964	-5.12589	2.96e-07	2.08e-06	7	134095789	134100278	-	TEC	Gm19514	ENSMUSG00000108478	6.83416	44.7843	14.4841	49.6533	23.5295	33.331	58.253	32.6383	30.4651	45.0539	13.1086	8.51879	10.3341	17.1664	12.788	4.33912	11.1343	13.8515	11.3044	1.84515	7	134095789	134100278	-	TEC	Gm19514
ENSMUSG00000030605	11264.8	-1.35115	0.117422	-11.5068	1.22e-30	2.14e-28	7	79133767	79149060	-	protein_coding	Mfge8	ENSMUSG00000030605	14881.4	16079.6	17745.3	17917.5	15657.7	17821.4	17326.1	14873.3	15978.5	15034.5	8685.53	9199.23	6494.49	5849.94	5232.14	4148.2	4383.21	7161.2	6251.32	4575.98	7	79133767	79149060	-	protein_coding	Mfge8
ENSMUSG00000090223	1536.19	-1.35048	0.129553	-10.4242	1.92e-25	1.9e-23	16	96467605	96525793	+	protein_coding	Pcp4	ENSMUSG00000090223	1479.6	2204.61	2034.46	2421.06	2650.6	2690.29	2898.09	2184.32	1862.06	1890.01	998.438	1234.16	977.039	906.959	485.032	791.167	752.494	749.133	874.959	639.346	16	96467605	96525793	+	protein_coding	Pcp4
ENSMUSG00000058398	15.6998	-1.34611	0.278059	-4.8411	1.29e-06	8.08e-06	9	110826689	110831839	+	protein_coding	Prss43	ENSMUSG00000058398	7.68843	13.2317	18.9407	40.4583	29.4119	27.3791	16.6437	17.9511	28.6187	42.8012	8.73906	3.19455	17.8498	9.5369	1.82686	5.7855	1.85572	10.3886	3.39132	8.30319	9	110826689	110831839	+	protein_coding	Prss43
ENSMUSG00000039323	4361.88	-1.34092	0.0883798	-15.1722	5.4e-52	5.21e-49	1	72824502	72852474	+	protein_coding	Igfbp2	ENSMUSG00000039323	5606.57	6944.63	8270.42	6244.36	6283.56	6275.76	7258.74	5208.25	5610.19	5156.42	2598.78	2429.98	2998.76	2127.68	2424.25	2641.8	2313.15	2668.71	2308.36	1867.3	1	72824502	72852474	+	protein_coding	Igfbp2
ENSMUSG00000118094	29.86	-1.33994	0.234674	-5.70979	1.13e-08	1.01e-07	18	83011902	83078855	+	lncRNA	AC142100.1	ENSMUSG00000118094	35.8793	28.4991	32.3107	72.641	42.3532	52.3773	63.4542	38.35	41.5433	41.6748	5.46191	7.45394	14.0919	9.5369	29.2298	23.8652	20.4129	3.46286	22.6088	11.9935	18	83011902	83078855	+	lncRNA	AC142100.1
ENSMUSG00000110236	52.4545	-1.33828	0.237092	-5.64456	1.66e-08	1.44e-07	8	38659762	38671066	+	lncRNA	Gm40493	ENSMUSG00000110236	88.8441	44.7843	25.6257	66.2044	112.942	148.799	113.385	84.0436	61.8534	41.6748	20.7553	7.45394	52.6098	24.7959	22.8358	33.9898	28.7637	25.3943	20.3479	23.987	8	38659762	38671066	+	lncRNA	Gm40493
ENSMUSG00000039195	9792.39	-1.33672	0.130468	-10.2456	1.24e-24	1.11e-22	2	32377096	32381938	-	protein_coding	1110008P14Rik	ENSMUSG00000039195	15161.6	12455.1	12525.4	13037.7	16194.2	16454.8	17113.9	14507.7	11757.7	12675.9	7960.19	8189.75	4600.54	4837.12	4272.12	3679.58	3709.58	5717.19	6645.85	4351.79	2	32377096	32381938	-	protein_coding	1110008P14Rik
ENSMUSG00000086552	4.77512	-1.33536	0.318107	-4.19784	2.69e-05	0.000130647	11	95145051	95159047	+	lncRNA	Dlx4os	ENSMUSG00000086552	5.12562	7.12478	2.22832	10.1146	16.4707	11.9039	9.3621	2.44787	12.0014	2.25269	2.18477	2.1297	3.75784	1.90738	0	1.44637	2.78358	0	2.26088	0	11	95145051	95159047	+	lncRNA	Dlx4os
ENSMUSG00000002763	4686.88	-1.33393	0.0940517	-14.1829	1.17e-45	7.59e-43	17	46711462	46725541	+	protein_coding	Pex6	ENSMUSG00000002763	6738.48	6920.2	6924.51	6958.82	6854.15	6895.95	6666.85	6483.6	7095.6	5950.49	3223.62	3623.68	2788.32	2314.61	2432.47	2128.34	2072.84	2577.52	3173.14	1914.35	17	46711462	46725541	+	protein_coding	Pex6
ENSMUSG00000106053	60.056	-1.33179	0.243482	-5.46976	4.51e-08	3.66e-07	3	159076363	159308081	+	lncRNA	Gm20752	ENSMUSG00000106053	90.5526	76.3369	92.4754	91.0311	87.0593	169.036	107.144	72.6202	52.6215	63.0754	81.9287	53.2424	15.9708	21.9349	21.0089	13.0174	8.35074	31.1658	24.8696	27.6773	3	159076363	159308081	+	lncRNA	Gm20752
ENSMUSG00000031604	3696.39	-1.33114	0.121476	-10.9581	6.08e-28	7.95e-26	8	64718138	64733792	-	protein_coding	Msmo1	ENSMUSG00000031604	5660.39	5038.24	5615.37	5211.76	6420.03	5337.73	5506.99	4806.8	4381.44	5433.5	2841.29	3509.74	2048.02	1763.37	1398.46	1731.31	1787.06	1953.05	1763.48	1719.68	8	64718138	64733792	-	protein_coding	Msmo1
ENSMUSG00000076498	287.819	-1.32845	0.237953	-5.58282	2.37e-08	2.02e-07	6	41546729	41548352	+	TR_C_gene	Trbc2	ENSMUSG00000076498	490.351	606.624	373.244	461.592	661.18	333.31	350.558	188.486	298.189	547.405	343.008	222.553	121.19	148.776	104.131	62.9173	93.7138	146.595	78.0002	124.548	6	41546729	41548352	+	TR_C_gene	Trbc2
ENSMUSG00000036151	157.526	-1.32754	0.249619	-5.31826	1.05e-07	8.05e-07	8	70072923	70080066	+	protein_coding	Tm6sf2	ENSMUSG00000036151	231.507	295.17	376.587	170.109	192.942	190.463	241.334	301.088	188.33	186.974	126.716	199.127	40.3968	59.1288	28.3164	78.8274	65.878	101.577	37.3045	38.7482	8	70072923	70080066	+	protein_coding	Tm6sf2
ENSMUSG00000029917	36.1015	-1.32697	0.267582	-4.95912	7.08e-07	4.65e-06	6	65381104	65458150	+	protein_coding	Qrfprl	ENSMUSG00000029917	20.5025	65.1409	43.4523	56.0899	101.177	30.9502	53.0519	65.2766	79.3939	37.1695	13.1086	17.0376	54.4887	7.62952	10.9612	25.3116	19.4851	6.92573	5.65219	9.22577	6	65381104	65458150	+	protein_coding	Qrfprl
ENSMUSG00000028464	430.135	-1.32676	0.0925214	-14.34	1.23e-46	8.14e-44	4	43514710	43523765	-	protein_coding	Tpm2	ENSMUSG00000028464	469.848	486.521	620.588	640.896	656.474	551.152	747.927	723.754	657.308	630.754	237.047	273.666	254.594	265.126	192.734	248.776	275.574	240.092	185.392	244.483	4	43514710	43523765	-	protein_coding	Tpm2
ENSMUSG00000050822	1208.78	-1.32242	0.104237	-12.6867	7.01e-37	2.34e-34	5	142692511	142722490	+	protein_coding	Slc29a4	ENSMUSG00000050822	1915.27	1873.82	1770.4	1554.88	1554.13	1490.37	1798.56	1763.28	2256.26	1411.31	782.146	811.415	822.967	712.407	748.101	600.969	571.562	761.83	521.132	454.83	5	142692511	142722490	+	protein_coding	Slc29a4
ENSMUSG00000087632	52.9734	-1.32228	0.233287	-5.66805	1.44e-08	1.27e-07	1	157383930	157384329	-	processed_pseudogene	Gm6058	ENSMUSG00000087632	16.2311	74.3013	45.6806	90.1116	68.2357	124.991	140.431	92.2032	86.7794	51.812	36.0486	38.3345	15.0314	20.0275	15.5283	26.0347	41.7537	23.0858	21.4783	31.3676	1	157383930	157384329	-	processed_pseudogene	Gm6058
ENSMUSG00000020834	390.551	-1.3198	0.107056	-12.3281	6.39e-35	1.81e-32	11	78032279	78037866	+	protein_coding	Dhrs13	ENSMUSG00000020834	459.597	598.482	560.423	586.645	610.592	529.725	627.26	574.434	588.992	480.95	247.971	290.704	314.719	192.645	173.552	222.019	182.788	206.618	212.522	150.38	11	78032279	78037866	+	protein_coding	Dhrs13
ENSMUSG00000118198	16.2811	-1.31882	0.261377	-5.04566	4.52e-07	3.08e-06	18	85071835	85083451	+	lncRNA	Gm50370	ENSMUSG00000118198	10.2512	25.4456	13.3699	22.0681	41.1767	19.0463	52.0116	31.0064	15.6941	16.8952	14.201	7.45394	8.45515	8.58321	4.56716	2.89275	12.0622	5.77144	4.52175	10.1483	18	85071835	85083451	+	lncRNA	Gm50370
ENSMUSG00000035504	898.093	-1.31604	0.0736871	-17.8598	2.43e-71	5.46e-68	10	80329952	80336441	+	protein_coding	Reep6	ENSMUSG00000035504	1267.74	1081.95	1378.22	1324.09	1410.6	1340.38	1471.93	1192.11	1318.31	1073.41	547.284	616.547	540.19	436.79	529.791	546.006	463.93	465.178	525.654	431.766	10	80329952	80336441	+	protein_coding	Reep6
ENSMUSG00000117994	40.4606	-1.31068	0.201133	-6.5165	7.2e-11	9.3e-10	18	38892457	38971276	+	lncRNA	Gm5820	ENSMUSG00000117994	74.3215	83.4617	62.3931	54.2509	24.706	85.7084	61.3737	54.6691	36.9274	55.191	32.7715	38.3345	20.6681	16.2127	18.2686	14.4637	19.4851	26.5486	14.6957	14.7612	18	38892457	38971276	+	lncRNA	Gm5820
ENSMUSG00000028364	435.527	-1.30758	0.153715	-8.50652	1.79e-17	6.31e-16	4	63959784	64047015	-	protein_coding	Tnc	ENSMUSG00000028364	959.345	826.475	557.081	457.914	562.356	447.588	649.105	474.071	626.843	742.263	358.302	341.816	265.867	189.784	274.03	188.752	271.863	200.846	159.392	156.838	4	63959784	64047015	-	protein_coding	Tnc
ENSMUSG00000107902	13.9789	-1.30238	0.253309	-5.14148	2.73e-07	1.93e-06	6	98121795	98248611	+	lncRNA	Gm32592	ENSMUSG00000107902	14.5226	44.7843	13.3699	13.7926	14.1177	20.2367	24.9656	11.4234	16.6173	36.0431	7.64668	9.58364	6.57622	7.62952	6.39402	4.33912	5.56716	9.2343	9.04351	3.69031	6	98121795	98248611	+	lncRNA	Gm32592
ENSMUSG00000000202	2266.61	-1.30153	0.114829	-11.3346	8.85e-30	1.44e-27	11	114791216	114795945	-	protein_coding	Btbd17	ENSMUSG00000000202	3312.86	3411.75	3667.82	3312.98	3217.66	3405.72	3519.11	2659.2	2903.42	3110.97	1913.85	1899.69	1413.89	1047.15	881.462	1097.08	1082.81	1177.37	1229.92	1067.42	11	114791216	114795945	-	protein_coding	Btbd17
ENSMUSG00000017754	2386.95	-1.30012	0.126918	-10.2438	1.26e-24	1.13e-22	2	164839517	164857711	-	protein_coding	Pltp	ENSMUSG00000017754	4219.24	3792.42	3529.66	3357.12	2900.02	3327.15	3670.98	2982.32	3627.19	2901.47	1980.49	1348.1	1622.45	1502.06	1393.9	892.413	1207.15	1727.97	850.09	906.893	2	164839517	164857711	-	protein_coding	Pltp
ENSMUSG00000026413	43.4489	-1.29624	0.190096	-6.81887	9.18e-12	1.38e-10	1	135871394	135919207	-	protein_coding	Pkp1	ENSMUSG00000026413	64.9245	38.6774	49.0231	57.0094	63.5298	74.9948	60.3335	57.117	72.0084	97.9922	19.6629	7.45394	24.426	11.4443	23.7492	37.6057	31.5472	23.0858	24.8696	29.5225	1	135871394	135919207	-	protein_coding	Pkp1
ENSMUSG00000063594	114.175	-1.29289	0.132962	-9.72377	2.39e-22	1.65e-20	7	16891785	16895436	+	protein_coding	Gng8	ENSMUSG00000063594	140.1	170.995	161.553	186.66	176.472	197.605	179.96	138.713	159.711	129.53	63.3582	85.1879	102.401	52.453	59.3731	52.0695	79.7959	55.4058	39.5653	52.5869	7	16891785	16895436	+	protein_coding	Gng8
ENSMUSG00000090818	4.73068	-1.29172	0.320924	-4.02502	5.7e-05	0.000257455	6	41543597	41543645	+	TR_J_pseudogene	Trbj2-6	ENSMUSG00000090818	15.3769	7.12478	7.79913	11.9536	14.1177	1.19039	3.1207	3.26383	6.46229	7.88443	2.18477	1.06485	6.57622	0.95369	2.7403	0.723187	0	1.15429	0	0.922577	6	41543597	41543645	+	TR_J_pseudogene	Trbj2-6
ENSMUSG00000045027	108.335	-1.289	0.255728	-5.0405	4.64e-07	3.15e-06	17	23993533	23998100	-	protein_coding	Prss22	ENSMUSG00000045027	181.959	60.0517	118.101	222.52	118.824	227.365	224.69	175.431	99.704	197.111	146.379	87.3176	42.2757	28.6107	22.8358	40.4985	42.6816	50.7887	46.348	33.2128	17	23993533	23998100	-	protein_coding	Prss22
ENSMUSG00000038199	18.9903	-1.28717	0.200515	-6.41932	1.37e-10	1.69e-09	5	24543431	24556809	-	protein_coding	Iqca1l	ENSMUSG00000038199	29.0452	23.41	16.7124	33.1022	25.8825	40.4734	16.6437	32.6383	32.3115	27.0323	7.64668	7.45394	9.39461	13.3517	11.8746	10.1246	8.35074	12.6972	12.4348	9.22577	5	24543431	24556809	-	protein_coding	Iqca1l
ENSMUSG00000100241	264.425	-1.28604	0.249813	-5.14801	2.63e-07	1.87e-06	14	32462437	32464850	-	protein_coding	Slc18a3	ENSMUSG00000100241	110.201	549.626	262.942	320.908	577.65	224.984	471.225	371.26	779.168	286.092	96.1297	113.939	254.594	110.628	95.9104	227.804	161.448	87.7259	84.7829	101.483	14	32462437	32464850	-	protein_coding	Slc18a3
ENSMUSG00000105352	70.2492	-1.28565	0.200201	-6.42181	1.35e-10	1.66e-09	5	64477007	64483967	+	lncRNA	C030018K13Rik	ENSMUSG00000105352	127.286	112.979	81.3338	98.3871	140.001	110.707	95.7014	81.5957	72.9316	103.624	69.9125	73.4746	54.4887	25.7496	29.2298	15.9101	25.0522	32.3201	29.3914	24.9096	5	64477007	64483967	+	lncRNA	C030018K13Rik
ENSMUSG00000022382	2879.91	-1.28531	0.0891383	-14.4193	3.91e-47	2.75e-44	15	85535436	85582473	-	protein_coding	Wnt7b	ENSMUSG00000022382	4347.38	4160.87	4382	3934.57	4315.32	3465.24	3491.02	3808.07	4122.94	5019	2136.7	1971.03	1846.98	1566.91	1507.16	1881.73	1452.1	1544.44	1287.57	1357.11	15	85535436	85582473	-	protein_coding	Wnt7b
ENSMUSG00000034209	2846.14	-1.28362	0.12071	-10.6339	2.07e-26	2.33e-24	11	5058127	5060385	+	protein_coding	Rasl10a	ENSMUSG00000034209	4548.99	3497.25	5100.63	3502.4	4144.73	3892.59	4350.25	4368.63	3777.67	3544.61	2699.28	2059.42	1365.98	1381.9	1298.9	1725.53	1239.62	1400.15	1812.09	1212.27	11	5058127	5060385	+	protein_coding	Rasl10a
ENSMUSG00000114660	5.15574	-1.28303	0.291428	-4.40256	1.07e-05	5.58e-05	13	26358953	26360026	-	TEC	Gm47881	ENSMUSG00000114660	6.83416	10.1783	6.68497	11.0341	9.41182	9.52315	6.2414	9.79149	3.69274	6.75808	2.18477	2.1297	1.87892	1.90738	0	2.89275	3.71144	2.30858	2.26088	3.69031	13	26358953	26360026	-	TEC	Gm47881
ENSMUSG00000027861	142.723	-1.28158	0.199874	-6.41194	1.44e-10	1.76e-09	3	102086414	102146514	+	protein_coding	Casq2	ENSMUSG00000027861	170	139.442	248.458	263.898	271.766	211.89	249.656	221.94	145.863	157.689	73.1896	171.441	93.9461	64.8509	32.8835	39.0521	62.1666	78.4916	110.783	47.0514	3	102086414	102146514	+	protein_coding	Casq2
ENSMUSG00000021919	248.183	-1.28099	0.271319	-4.72136	2.34e-06	1.4e-05	14	32408202	32465989	-	protein_coding	Chat	ENSMUSG00000021919	93.9697	501.788	200.549	399.985	529.415	230.936	523.237	375.34	640.69	268.071	76.4668	90.5121	290.293	70.5731	63.0268	209.724	159.592	92.343	57.6524	89.4899	14	32408202	32465989	-	protein_coding	Chat
ENSMUSG00000032257	35.062	-1.27985	0.321524	-3.98058	6.87e-05	0.000305276	9	49415193	49427021	-	protein_coding	Ankk1	ENSMUSG00000032257	8.5427	100.765	23.3974	42.2973	85.8828	38.0926	44.73	73.4361	118.168	41.6748	7.64668	54.3073	20.6681	1.90738	9.13432	13.7406	5.56716	4.61715	1.13044	5.53546	9	49415193	49427021	-	protein_coding	Ankk1
ENSMUSG00000024266	8.92283	-1.27834	0.303211	-4.21601	2.49e-05	0.000121535	8	119612746	119616924	+	protein_coding	Adad2	ENSMUSG00000024266	1.70854	6.10696	8.91329	11.0341	12.9412	19.0463	29.1265	16.3191	24.0028	11.2635	2.18477	8.51879	5.63676	0	7.30746	2.89275	1.85572	2.30858	4.52175	2.76773	8	119612746	119616924	+	protein_coding	Adad2
ENSMUSG00000023571	906.476	-1.27729	0.0903054	-14.1442	2.03e-45	1.29e-42	4	155962317	155966629	+	protein_coding	C1qtnf12	ENSMUSG00000023571	1001.2	1010.7	1428.36	1306.62	1292.95	1489.18	1493.77	1446.69	1378.32	1052.01	558.208	505.803	593.739	543.603	429.313	573.488	499.189	565.601	553.915	406.856	4	155962317	155966629	+	protein_coding	C1qtnf12
ENSMUSG00000046916	29.2534	-1.27488	0.21129	-6.03378	1.6e-09	1.66e-08	10	5593774	5606904	+	protein_coding	Myct1	ENSMUSG00000046916	37.5879	46.82	35.6532	44.1363	37.6473	61.9005	30.1668	31.0064	53.5447	49.5593	17.4781	23.4267	16.9103	10.4906	6.39402	24.5884	12.99	18.4686	22.6088	3.69031	10	5593774	5606904	+	protein_coding	Myct1
ENSMUSG00000076587	5.68574	-1.27414	0.312107	-4.08238	4.46e-05	0.000205967	6	70335840	70336507	-	IG_V_gene	Igkv6-20	ENSMUSG00000076587	10.2512	6.10696	13.3699	9.19506	4.70591	7.14236	17.684	3.26383	7.38548	12.3898	4.36953	3.19455	0	4.76845	0.913432	5.7855	0.92786	0	2.26088	0	6	70335840	70336507	-	IG_V_gene	Igkv6-20
ENSMUSG00000031170	233.586	-1.2732	0.262973	-4.84156	1.29e-06	8.06e-06	X	8271132	8280179	+	protein_coding	Slc38a5	ENSMUSG00000031170	518.542	332.829	423.381	383.434	285.884	292.837	350.558	221.94	370.197	332.272	149.656	378.021	119.311	50.5456	40.191	60.0246	64.0223	90.0344	137.913	70.1158	X	8271132	8280179	+	protein_coding	Slc38a5
ENSMUSG00000031074	28.3607	-1.27205	0.232066	-5.48143	4.22e-08	3.44e-07	7	144838082	144844436	+	protein_coding	Fgf3	ENSMUSG00000031074	22.211	50.8913	20.0549	32.1827	44.7061	26.1887	37.4484	45.6936	76.6243	61.9491	26.2172	24.4915	18.7892	11.4443	13.7015	7.23187	16.7015	9.2343	11.3044	10.1483	7	144838082	144844436	+	protein_coding	Fgf3
ENSMUSG00000006218	291.432	-1.26941	0.117112	-10.8393	2.24e-27	2.77e-25	4	141368219	141384175	+	protein_coding	Fam131c	ENSMUSG00000006218	399.798	459.04	350.961	362.285	522.356	332.12	406.731	445.513	510.521	364.936	211.922	195.932	242.381	144.007	135.188	161.271	127.117	177.76	151.479	127.316	4	141368219	141384175	+	protein_coding	Fam131c
ENSMUSG00000096753	118.815	-1.2692	0.166596	-7.61844	2.57e-14	5.77e-13	12	103310974	103317065	+	protein_coding	Fam181a	ENSMUSG00000096753	134.12	105.854	162.668	183.901	194.119	186.892	196.604	143.608	236.335	168.952	63.3582	53.2424	110.856	44.8234	102.304	80.997	52.888	69.2573	48.6088	36.9031	12	103310974	103317065	+	protein_coding	Fam181a
ENSMUSG00000040706	39.8864	-1.26773	0.20702	-6.12373	9.14e-10	9.89e-09	4	141746671	141759263	+	protein_coding	Agmat	ENSMUSG00000040706	59.7989	36.6417	56.8222	57.9289	58.8238	46.4254	50.9714	96.2829	48.0056	68.7072	21.8477	33.0103	20.6681	20.0275	10.0478	22.4188	14.8458	13.8515	48.6088	11.9935	4	141746671	141759263	+	protein_coding	Agmat
ENSMUSG00000037010	1428.25	-1.26699	0.216394	-5.85502	4.77e-09	4.58e-08	X	48025145	48034853	-	protein_coding	Apln	ENSMUSG00000037010	2839.59	2306.39	2484.58	1641.32	1948.25	1765.35	1830.81	1871.81	2073.47	2144.57	1671.35	1523.8	802.299	576.983	422.919	411.494	525.169	648.71	549.393	526.791	X	48025145	48034853	-	protein_coding	Apln
ENSMUSG00000032259	1720.77	-1.26482	0.283874	-4.45558	8.37e-06	4.46e-05	9	49340626	49408177	+	protein_coding	Drd2	ENSMUSG00000032259	556.13	2997.5	1459.55	2424.74	4320.02	2022.48	2621.39	2322.21	4845.8	2729.14	533.083	1568.52	1827.25	407.226	278.597	723.911	1329.62	611.772	509.828	326.592	9	49340626	49408177	+	protein_coding	Drd2
ENSMUSG00000085230	2.69507	-1.26128	0.326564	-3.86226	0.000112341	0.000476541	11	71429827	71436180	-	lncRNA	Gm16013	ENSMUSG00000085230	5.12562	11.1961	3.34249	8.27555	2.35295	3.57118	8.32186	1.63191	1.84637	1.12635	1.09238	2.1297	0	0	0.913432	0	0	0	1.13044	1.84515	11	71429827	71436180	-	lncRNA	Gm16013
ENSMUSG00000096937	1.92013	-1.26115	0.318884	-3.95489	7.66e-05	0.00033661	10	22402882	22407470	+	lncRNA	Gm10825	ENSMUSG00000096937	1.70854	4.0713	6.68497	3.67802	7.05886	7.14236	2.08047	0	1.84637	2.25269	0	0	1.87892	0	0	0	0	0	0	0	10	22402882	22407470	+	lncRNA	Gm10825
ENSMUSG00000047904	1689.48	-1.25782	0.148419	-8.47477	2.36e-17	8.15e-16	11	113619341	113626028	+	protein_coding	Sstr2	ENSMUSG00000047904	3135.17	2746.09	2071.23	1785.68	2831.78	2211.75	2305.16	2964.37	1705.12	2418.27	1555.55	1354.49	926.308	962.273	978.286	760.793	520.529	1026.16	602.524	928.112	11	113619341	113626028	+	protein_coding	Sstr2
ENSMUSG00000026525	258.375	-1.25531	0.130043	-9.653	4.77e-22	3.18e-20	1	175662420	175692776	-	protein_coding	Opn3	ENSMUSG00000026525	451.054	396.952	294.139	344.815	430.591	305.931	440.018	328.015	288.034	400.98	230.493	179.959	133.403	168.803	88.6029	144.637	120.622	159.292	110.783	150.38	1	175662420	175692776	-	protein_coding	Opn3
ENSMUSG00000045246	560.367	-1.25498	0.22194	-5.65458	1.56e-08	1.37e-07	8	119623853	119635680	-	protein_coding	Kcng4	ENSMUSG00000045246	1247.23	741.995	669.611	765.948	732.945	784.47	637.663	882.05	819.788	917.973	445.692	603.769	254.594	240.33	112.352	164.887	182.788	217.006	527.915	258.321	8	119623853	119635680	-	protein_coding	Kcng4
ENSMUSG00000091028	2.54357	-1.25386	0.321648	-3.89824	9.69e-05	0.000416511	9	3000921	3002330	+	protein_coding	Gm10722	ENSMUSG00000091028	7.68843	1.01783	2.22832	4.59753	12.9412	3.57118	3.1207	8.97553	1.84637	1.12635	0	0	3.75784	0	0	0	0	0	0	0	9	3000921	3002330	+	protein_coding	Gm10722
ENSMUSG00000053783	318.207	-1.25326	0.101723	-12.3203	7.04e-35	1.98e-32	11	75999911	76003569	+	protein_coding	1700016K19Rik	ENSMUSG00000053783	468.14	312.473	469.062	520.44	494.12	486.871	543.002	405.531	417.28	394.222	214.107	145.884	203.863	218.395	188.167	159.101	152.169	230.858	170.696	169.754	11	75999911	76003569	+	protein_coding	1700016K19Rik
ENSMUSG00000113055	165.832	-1.2531	0.187723	-6.67524	2.47e-11	3.47e-10	12	90068098	90072373	+	TEC	Gm48700	ENSMUSG00000113055	107.638	235.118	221.718	268.496	163.53	354.737	426.495	214.597	229.873	172.331	124.532	120.328	114.614	77.2489	59.3731	47.7304	102.065	65.7944	110.783	99.6383	12	90068098	90072373	+	TEC	Gm48700
ENSMUSG00000102153	10.6052	-1.25273	0.270449	-4.63203	3.62e-06	2.08e-05	9	32525144	32526958	-	TEC	Gm37474	ENSMUSG00000102153	11.9598	32.5704	12.2558	16.5511	4.70591	22.6175	20.8047	10.6074	13.8478	13.5162	10.9238	6.38909	2.81838	6.67583	1.82686	2.89275	5.56716	3.46286	5.65219	6.45804	9	32525144	32526958	-	TEC	Gm37474
ENSMUSG00000027720	3.89285	-1.25257	0.325473	-3.84847	0.000118857	0.000501223	3	37120522	37125959	-	protein_coding	Il2	ENSMUSG00000027720	5.12562	8.14261	2.22832	5.51704	4.70591	11.9039	13.523	6.52766	5.53911	2.25269	2.18477	0	5.63676	0	0	0	0	2.30858	2.26088	0	3	37120522	37125959	-	protein_coding	Il2
ENSMUSG00000099135	10.4139	-1.25164	0.282884	-4.42457	9.66e-06	5.09e-05	1	51938973	51939095	-	snoRNA	Gm27607	ENSMUSG00000099135	11.9598	21.3743	6.68497	11.0341	16.4707	22.6175	22.8851	7.34361	19.3869	19.1479	9.83144	9.58364	9.39461	0.95369	2.7403	5.7855	5.56716	3.46286	1.13044	0.922577	1	51938973	51939095	-	snoRNA	Gm27607
ENSMUSG00000112968	1.8313	-1.25086	0.319241	-3.91822	8.92e-05	0.000387314	13	3325295	3358455	-	lncRNA	Gm48530	ENSMUSG00000112968	0	6.10696	2.22832	2.75852	2.35295	3.57118	10.4023	3.26383	2.76955	1.12635	1.09238	0	0	0.95369	0	0	0	0	0	0	13	3325295	3358455	-	lncRNA	Gm48530
ENSMUSG00000058741	7.63768	-1.25072	0.29856	-4.18919	2.8e-05	0.000135242	7	25301410	25304132	+	protein_coding	Prr19	ENSMUSG00000058741	10.2512	4.0713	15.5983	5.51704	21.1766	16.6655	13.523	9.79149	8.30866	14.6425	0	0	7.51568	7.62952	3.65373	3.61594	3.71144	0	3.39132	3.69031	7	25301410	25304132	+	protein_coding	Prr19
ENSMUSG00000024793	602.058	-1.25041	0.244428	-5.11564	3.13e-07	2.19e-06	4	152115933	152120119	+	protein_coding	Tnfrsf25	ENSMUSG00000024793	1296.78	1222.41	1119.73	480.902	881.181	654.717	860.273	1163.55	489.288	733.252	664.169	577.148	169.103	274.663	148.889	323.988	186.5	407.464	153.74	233.412	4	152115933	152120119	+	protein_coding	Tnfrsf25
ENSMUSG00000102319	11.8746	-1.24958	0.299315	-4.17479	2.98e-05	0.000143138	1	44560884	44565447	+	TEC	Gm37626	ENSMUSG00000102319	7.68843	12.2139	4.45665	13.7926	23.5295	36.9022	14.5633	20.3989	29.5419	21.4006	4.36953	10.6485	12.213	9.5369	0.913432	4.33912	0	4.61715	4.52175	1.84515	1	44560884	44565447	+	TEC	Gm37626
ENSMUSG00000022176	725.663	-1.24808	0.162875	-7.66277	1.82e-14	4.18e-13	14	54476099	54480431	+	protein_coding	Rem2	ENSMUSG00000022176	483.517	1301.8	910.27	1040.88	1503.54	799.945	993.422	1023.21	1462.32	879.677	377.964	587.796	631.318	388.152	281.337	423.788	477.848	370.526	262.262	313.676	14	54476099	54480431	+	protein_coding	Rem2
ENSMUSG00000025317	10.0048	-1.2478	0.253952	-4.91354	8.94e-07	5.77e-06	8	121916125	121944904	-	protein_coding	Car5a	ENSMUSG00000025317	7.68843	14.2496	24.5116	11.0341	8.23534	15.4751	18.7242	17.1351	16.6173	14.6425	4.36953	9.58364	5.63676	5.72214	4.56716	2.16956	5.56716	4.61715	6.78263	2.76773	8	121916125	121944904	-	protein_coding	Car5a
ENSMUSG00000026697	1068.46	-1.24636	0.216366	-5.76041	8.39e-09	7.68e-08	1	162639154	162649693	+	protein_coding	Myoc	ENSMUSG00000026697	812.411	1815.8	2113.56	1419.72	1756.48	830.895	1882.82	828.196	2617.23	1494.66	806.178	768.821	1044.68	488.289	484.119	502.615	429.599	489.418	454.436	329.36	1	162639154	162649693	+	protein_coding	Myoc
ENSMUSG00000025439	2693.24	-1.24435	0.0646958	-19.2338	1.93e-82	7.23e-79	7	97696633	97720796	+	protein_coding	Clns1a	ENSMUSG00000025439	3338.49	3484.02	3852.77	3482.17	4020.02	4075.91	4151.57	4504.9	3474.87	3590.79	1590.51	1633.48	1888.32	1596.48	1417.65	1645.25	1697.98	1529.43	1519.31	1370.95	7	97696633	97720796	+	protein_coding	Clns1a
ENSMUSG00000017817	70.1794	-1.24317	0.165842	-7.49612	6.57e-14	1.37e-12	2	163336241	163397993	-	protein_coding	Jph2	ENSMUSG00000017817	73.4672	54.9626	122.558	100.226	94.1182	122.611	116.506	107.706	147.71	65.3281	48.0648	34.0752	41.3363	53.4067	34.7104	41.9449	27.8358	27.7029	54.261	35.0579	2	163336241	163397993	-	protein_coding	Jph2
ENSMUSG00000031506	73.7705	-1.2425	0.242185	-5.13037	2.89e-07	2.04e-06	1	135132699	135145317	+	protein_coding	Ptpn7	ENSMUSG00000031506	21.3567	152.674	41.224	79.997	190.589	73.8044	111.305	106.074	173.559	137.414	27.3096	57.5018	55.4282	19.0738	24.6627	33.2666	57.5273	35.7829	31.6523	45.2063	1	135132699	135145317	+	protein_coding	Ptpn7
ENSMUSG00000086491	3.09794	-1.24153	0.326339	-3.80441	0.00014214	0.000589609	2	11385002	11387064	+	lncRNA	Gm13291	ENSMUSG00000086491	3.41708	11.1961	12.2558	6.43654	0	4.76158	2.08047	2.44787	2.76955	9.01078	2.18477	0	0	1.90738	0	0.723187	0	0	0	2.76773	2	11385002	11387064	+	lncRNA	Gm13291
ENSMUSG00000000120	240.172	-1.24129	0.310175	-4.0019	6.28e-05	0.00028102	11	95568817	95587735	-	protein_coding	Ngfr	ENSMUSG00000000120	59.7989	533.341	178.266	288.725	509.415	72.614	555.484	401.451	1015.5	175.71	43.6953	78.7988	300.627	49.5919	107.785	167.056	57.5273	53.0972	105.131	49.8191	11	95568817	95587735	-	protein_coding	Ngfr
ENSMUSG00000050493	18.9765	-1.23805	0.251307	-4.92646	8.37e-07	5.42e-06	4	129576814	129578549	-	protein_coding	Fam167b	ENSMUSG00000050493	13.6683	30.5348	22.2832	17.4706	25.8825	55.9485	45.7702	26.1106	20.3101	22.5269	13.1086	19.1673	11.2735	7.62952	7.30746	1.44637	9.2786	11.5429	9.04351	9.22577	4	129576814	129578549	-	protein_coding	Fam167b
ENSMUSG00000045672	585.859	-1.23213	0.116355	-10.5894	3.34e-26	3.66e-24	4	63214003	63334991	+	protein_coding	Col27a1	ENSMUSG00000045672	672.31	1154.21	882.416	814.682	724.71	872.559	839.468	800.454	841.021	684.819	427.122	455.755	447.183	340.467	277.683	224.188	320.112	356.675	291.653	289.689	4	63214003	63334991	+	protein_coding	Col27a1
ENSMUSG00000086296	77.8587	-1.23177	0.192161	-6.41008	1.45e-10	1.78e-09	9	106148686	106160201	+	lncRNA	D030055H07Rik	ENSMUSG00000086296	50.4019	99.7469	96.9321	185.74	150.589	139.276	146.673	49.7734	96.0112	107.003	50.2496	31.9455	55.4282	35.2865	45.6716	45.5608	38.9701	54.2515	26.0001	51.6643	9	106148686	106160201	+	lncRNA	D030055H07Rik
ENSMUSG00000109588	46.1493	-1.23166	0.254098	-4.84718	1.25e-06	7.85e-06	16	56914343	56928061	-	protein_coding	Lnp1	ENSMUSG00000109588	28.1909	65.1409	80.2196	86.4336	74.118	42.8542	48.8909	89.7553	111.705	57.4437	7.64668	8.51879	37.5784	20.0275	37.4507	28.2043	54.7437	5.77144	22.6088	15.6838	16	56914343	56928061	-	protein_coding	Lnp1
ENSMUSG00000092627	12.6434	-1.23098	0.295668	-4.16339	3.14e-05	0.000149907	1	89930233	89933290	+	lncRNA	D130058E05Rik	ENSMUSG00000092627	8.5427	21.3743	27.854	21.1486	30.5884	3.57118	12.4828	12.2394	41.5433	15.7689	2.18477	2.1297	17.8498	1.90738	5.48059	9.40144	3.71144	4.61715	6.78263	3.69031	1	89930233	89933290	+	lncRNA	D130058E05Rik
ENSMUSG00000106369	68.7005	-1.23095	0.233976	-5.26104	1.43e-07	1.07e-06	3	127479434	127481427	-	transcribed_unprocessed_pseudogene	Gm43355	ENSMUSG00000106369	29.0452	58.0161	54.5939	134.248	101.177	194.034	186.202	87.3074	71.0852	90.1078	48.0648	59.6315	23.4865	38.1476	25.5761	25.3116	25.0522	26.5486	47.4784	48.8966	3	127479434	127481427	-	transcribed_unprocessed_pseudogene	Gm43355
ENSMUSG00000117246	133.937	-1.22939	0.178567	-6.88475	5.79e-12	8.98e-11	17	66227248	66228027	-	processed_pseudogene	Gm17891	ENSMUSG00000117246	157.186	149.62	174.923	252.864	165.883	239.269	283.984	171.351	177.252	145.299	137.64	85.1879	70.4595	91.5543	32.8835	57.1318	48.2487	111.966	63.3045	62.7352	17	66227248	66228027	-	processed_pseudogene	Gm17891
ENSMUSG00000111254	83.9378	-1.22876	0.207481	-5.92229	3.17e-09	3.14e-08	9	37138552	37139624	-	TEC	Gm48717	ENSMUSG00000111254	48.6934	108.907	94.7037	217.003	76.471	173.798	177.88	97.9149	126.476	92.3605	49.1572	93.7067	41.3363	56.2677	31.0567	39.7753	47.3209	33.4743	32.7827	39.6708	9	37138552	37139624	-	TEC	Gm48717
ENSMUSG00000093460	171.002	-1.2287	0.293321	-4.18891	2.8e-05	0.00013537	17	85600650	85618398	-	lncRNA	Six3os1	ENSMUSG00000093460	79.4471	347.079	148.184	266.657	329.414	151.18	299.587	323.119	526.215	149.804	40.4182	83.0582	252.715	39.1013	44.7582	111.371	116.91	54.2515	32.7827	23.987	17	85600650	85618398	-	lncRNA	Six3os1
ENSMUSG00000030236	15.424	-1.22861	0.284001	-4.32609	1.52e-05	7.7e-05	6	141629517	141686646	+	protein_coding	Slco1b2	ENSMUSG00000030236	22.211	46.82	31.1965	17.4706	18.8236	40.4734	13.523	10.6074	14.771	18.0216	4.36953	8.51879	11.2735	16.2127	11.8746	1.44637	0.92786	10.3886	6.78263	2.76773	6	141629517	141686646	+	protein_coding	Slco1b2
ENSMUSG00000027318	679.865	-1.22577	0.169269	-7.24159	4.43e-13	8.04e-12	2	131050590	131063814	-	protein_coding	Adam33	ENSMUSG00000027318	1498.39	623.927	859.019	1024.33	448.238	1408.24	1248.28	957.934	865.024	777.18	332.084	327.973	341.964	351.912	541.665	400.646	378.567	502.115	508.697	201.122	2	131050590	131063814	-	protein_coding	Adam33
ENSMUSG00000045915	55.4563	-1.22504	0.17304	-7.0795	1.45e-12	2.44e-11	11	68587020	68597966	+	protein_coding	Ccdc42	ENSMUSG00000045915	70.0501	63.1052	82.448	68.9629	97.6476	86.8988	68.6554	80.7798	97.8576	75.4653	30.5867	34.0752	62.0044	24.7959	14.6149	26.7579	25.9801	41.5544	38.4349	18.4515	11	68587020	68597966	+	protein_coding	Ccdc42
ENSMUSG00000091898	1835.67	-1.22386	0.18033	-6.78677	1.15e-11	1.69e-10	14	31208311	31211729	+	protein_coding	Tnnc1	ENSMUSG00000091898	2848.99	2242.27	2248.38	2971.84	2780.01	2705.77	3333.95	2729.38	2005.16	2423.9	1756.55	1296.99	674.533	1324.68	385.468	1029.1	742.288	1298.57	955.22	960.402	14	31208311	31211729	+	protein_coding	Tnnc1
ENSMUSG00000058743	139.075	-1.22371	0.143783	-8.51082	1.73e-17	6.11e-16	7	45816459	45824782	-	protein_coding	Kcnj14	ENSMUSG00000058743	234.07	188.298	222.832	196.774	160.001	177.369	211.167	204.805	234.489	141.92	133.271	107.55	110.856	63.8972	72.1611	54.2391	79.7959	69.2573	58.7828	59.9675	7	45816459	45824782	-	protein_coding	Kcnj14
ENSMUSG00000044986	1483.36	-1.22277	0.0981963	-12.4523	1.36e-35	4.09e-33	15	78399555	78405907	-	protein_coding	Tst	ENSMUSG00000044986	1744.42	2002.06	2444.47	2212.33	2232.95	2317.7	2479.92	1741.25	1924.84	1794.27	1215.82	974.336	970.463	822.081	854.059	860.593	939.922	806.847	634.176	694.7	15	78399555	78405907	-	protein_coding	Tst
ENSMUSG00000107768	3.47158	-1.22184	0.325463	-3.75417	0.000173919	0.000707688	6	135312154	135319561	-	lncRNA	Gm44275	ENSMUSG00000107768	8.5427	13.2317	4.45665	8.27555	0	2.38079	3.1207	0	16.6173	4.50539	1.09238	0	0.939461	1.90738	0	0	0	2.30858	1.13044	0.922577	6	135312154	135319561	-	lncRNA	Gm44275
ENSMUSG00000057933	2.27878	-1.22178	0.326562	-3.74134	0.000183041	0.000741414	9	78331017	78355788	-	protein_coding	Gsta2	ENSMUSG00000057933	1.70854	6.10696	4.45665	3.67802	5.88238	3.57118	6.2414	1.63191	3.69274	2.25269	2.18477	0	0	1.90738	0	0	0	0	2.26088	0	9	78331017	78355788	-	protein_coding	Gsta2
ENSMUSG00000027966	951.499	-1.22114	0.137057	-8.90976	5.11e-19	2.18e-17	3	114030539	114220718	+	protein_coding	Col11a1	ENSMUSG00000027966	1273.72	1338.44	1330.31	1637.64	1175.3	1254.68	1386.63	1376.52	1643.27	1062.15	483.926	661.271	910.337	576.029	360.806	458.501	541.87	350.903	787.916	419.772	3	114030539	114220718	+	protein_coding	Col11a1
ENSMUSG00000117935	20.2305	-1.22089	0.220557	-5.53548	3.1e-08	2.59e-07	19	38703510	38704324	-	processed_pseudogene	Gm8717	ENSMUSG00000117935	43.5678	20.3565	28.9682	32.1827	21.1766	30.9502	30.1668	28.5585	38.7738	19.1479	9.83144	18.1024	15.0314	9.5369	14.6149	12.2942	8.35074	0	14.6957	8.30319	19	38703510	38704324	-	processed_pseudogene	Gm8717
ENSMUSG00000067719	2360.98	-1.21902	0.0827388	-14.7334	3.93e-49	3.4e-46	5	24581553	24581862	-	processed_pseudogene	Gm10221	ENSMUSG00000067719	2582.46	3022.94	3325.77	3301.95	3747.08	3892.59	3758.36	3702.81	2780.63	3054.65	1404.8	1788.95	1635.6	1380.94	1219.43	1363.93	1268.38	1397.84	1319.22	1271.31	5	24581553	24581862	-	processed_pseudogene	Gm10221
ENSMUSG00000032946	2830.95	-1.21728	0.15293	-7.95967	1.72e-15	4.59e-14	19	6399339	6415216	+	protein_coding	Rasgrp2	ENSMUSG00000032946	2519.24	4075.38	3387.05	3714.8	4683.55	3646.18	4384.58	4425.75	5701.59	3668.51	1311.95	1976.36	2881.33	1627	977.372	1706	2202.74	1433.63	1192.61	1103.4	19	6399339	6415216	+	protein_coding	Rasgrp2
ENSMUSG00000085950	7.67863	-1.21682	0.288513	-4.21755	2.47e-05	0.000120796	2	38424001	38455851	+	lncRNA	Gm13589	ENSMUSG00000085950	5.97989	8.14261	13.3699	17.4706	10.5883	9.52315	12.4828	13.0553	16.6173	10.1371	0	5.32424	7.51568	5.72214	5.48059	5.7855	1.85572	0	4.52175	0	2	38424001	38455851	+	lncRNA	Gm13589
ENSMUSG00000061762	2305.38	-1.21677	0.228677	-5.32091	1.03e-07	7.95e-07	6	7554878	7565834	+	protein_coding	Tac1	ENSMUSG00000061762	1383.06	3909.47	3589.83	3863.76	4629.44	2464.12	3484.78	3342.16	4421.13	2479.09	953.65	1570.65	2478.3	870.719	731.659	2100.86	1415.91	1118.5	721.22	579.378	6	7554878	7565834	+	protein_coding	Tac1
ENSMUSG00000046417	937.837	-1.21673	0.113687	-10.7025	9.91e-27	1.15e-24	11	62604883	62648523	-	protein_coding	Lrrc75a	ENSMUSG00000046417	1502.66	1413.76	1291.31	1230.3	1369.42	1342.76	1464.65	1316.14	1101.36	1184.92	872.814	732.616	587.163	560.77	464.023	381.12	443.517	584.07	456.697	456.675	11	62604883	62648523	-	protein_coding	Lrrc75a
ENSMUSG00000044254	477.689	-1.21535	0.165543	-7.34158	2.11e-13	4.03e-12	4	106442328	106464329	-	protein_coding	Pcsk9	ENSMUSG00000044254	512.562	376.596	765.429	714.456	594.121	746.377	869.635	717.226	914.876	592.459	232.678	183.154	437.789	404.365	188.167	371.718	299.699	266.64	158.261	207.58	4	106442328	106464329	-	protein_coding	Pcsk9
ENSMUSG00000034486	23.4377	-1.21349	0.295746	-4.10315	4.08e-05	0.000189847	1	89927955	89931179	-	protein_coding	Gbx2	ENSMUSG00000034486	18.7939	49.8735	30.0824	45.9753	50.5885	11.9039	33.2875	45.6936	62.7766	11.2635	2.18477	6.38909	18.7892	11.4443	5.48059	31.0971	17.6293	0	9.04351	6.45804	1	89927955	89931179	-	protein_coding	Gbx2
ENSMUSG00000031932	2069.45	-1.21101	0.136025	-8.90287	5.44e-19	2.31e-17	9	14860209	14870789	+	protein_coding	Gpr83	ENSMUSG00000031932	1793.11	2961.87	2328.6	3554.81	3503.55	2987.89	3151.91	2829.74	3595.81	2543.29	1081.46	1562.13	1918.38	987.069	1058.67	1363.93	1403.85	946.516	1037.74	778.655	9	14860209	14870789	+	protein_coding	Gpr83
ENSMUSG00000103649	87.4341	-1.21049	0.146271	-8.2757	1.28e-16	4.02e-15	1	180743209	180755836	-	lncRNA	Gm37768	ENSMUSG00000103649	84.5727	109.925	115.873	132.409	127.06	136.895	178.92	142.792	133.862	75.4653	55.7115	62.8261	66.7017	30.5181	52.9791	46.284	59.383	46.1715	49.7393	40.5934	1	180743209	180755836	-	lncRNA	Gm37768
ENSMUSG00000104621	35.2603	-1.20965	0.249033	-4.85741	1.19e-06	7.48e-06	3	152250028	152252803	-	TEC	Gm43185	ENSMUSG00000104621	9.39697	49.8735	33.4249	61.6069	56.4709	84.518	68.6554	51.4053	59.0838	43.9275	22.94	33.0103	12.213	4.76845	9.13432	24.5884	26.9079	24.24	12.4348	16.6064	3	152250028	152252803	-	TEC	Gm43185
ENSMUSG00000038775	303.949	-1.20823	0.224923	-5.37176	7.8e-08	6.11e-07	9	119052777	119071525	+	protein_coding	Vill	ENSMUSG00000038775	231.507	214.761	252.915	529.635	411.767	572.58	587.732	696.827	603.763	307.493	196.629	190.608	188.832	136.378	316.047	115.71	129.9	150.057	172.957	72.8836	9	119052777	119071525	+	protein_coding	Vill
ENSMUSG00000063163	4.02216	-1.20758	0.326118	-3.7029	0.000213148	0.000848495	16	69856873	69863744	-	protein_coding	Speer2	ENSMUSG00000063163	6.83416	12.2139	5.57081	10.1146	3.52943	2.38079	8.32186	9.79149	9.23185	0	2.18477	0	0	0	0.913432	2.89275	0.92786	0	0	5.53546	16	69856873	69863744	-	protein_coding	Speer2
ENSMUSG00000108360	4.79449	-1.20729	0.326564	-3.69696	0.000218201	0.000866972	7	24448353	24451327	+	lncRNA	Gm36159	ENSMUSG00000108360	5.12562	0	7.79913	11.0341	3.52943	19.0463	9.3621	13.0553	0.923185	12.3898	0	2.1297	3.75784	0	0	2.89275	0	1.15429	0	3.69031	7	24448353	24451327	+	lncRNA	Gm36159
ENSMUSG00000110279	215.127	-1.20593	0.241409	-4.99539	5.87e-07	3.91e-06	7	45121916	45124144	+	lncRNA	Gm45552	ENSMUSG00000110279	523.667	371.506	385.5	177.465	300.002	389.259	380.725	148.504	243.721	224.143	240.324	134.171	146.556	171.664	59.3731	49.1767	98.3531	91.1887	56.5219	110.709	7	45121916	45124144	+	lncRNA	Gm45552
ENSMUSG00000033715	86.8462	-1.20591	0.175521	-6.87042	6.4e-12	9.84e-11	13	4049010	4090688	+	protein_coding	Akr1c14	ENSMUSG00000033715	90.5526	124.175	182.723	95.6286	129.412	123.801	83.2186	171.351	144.94	90.1078	52.4344	48.983	62.0044	63.8972	51.1522	23.142	39.898	80.8001	31.6523	47.0514	13	4049010	4090688	+	protein_coding	Akr1c14
ENSMUSG00000107256	6.41256	-1.20581	0.30026	-4.01589	5.92e-05	0.000266522	5	114838874	114842075	-	TEC	Gm13821	ENSMUSG00000107256	6.83416	4.0713	8.91329	10.1146	15.2942	9.52315	11.4426	18.767	7.38548	6.75808	0	5.32424	3.75784	0	0	5.7855	3.71144	4.61715	2.26088	3.69031	5	114838874	114842075	-	TEC	Gm13821
ENSMUSG00000040013	4.33408	-1.20354	0.318417	-3.77975	0.000156988	0.000645017	5	135291703	135350044	-	protein_coding	Fkbp6	ENSMUSG00000040013	3.41708	0	0	2.75852	32.9414	8.33276	16.6437	8.15957	3.69274	4.50539	0	0	0	0	3.65373	1.44637	0	0	1.13044	0	5	135291703	135350044	-	protein_coding	Fkbp6
ENSMUSG00000096974	60.2188	-1.20302	0.143634	-8.37563	5.49e-17	1.81e-15	4	43045965	43053254	+	lncRNA	Gm26881	ENSMUSG00000096974	55.5275	99.7469	73.5347	110.341	75.2945	97.6123	109.224	84.0436	71.0852	74.3389	33.8639	43.6588	40.3968	21.9349	27.403	37.6057	36.1865	41.5544	35.0436	35.9805	4	43045965	43053254	+	lncRNA	Gm26881
ENSMUSG00000035238	45.2646	-1.20218	0.311138	-3.86382	0.000111627	0.000473754	2	163853650	163859746	+	protein_coding	Kcnk15	ENSMUSG00000035238	43.5678	229.011	31.1965	75.3995	71.7651	33.331	64.4944	75.0681	66.4693	19.1479	19.6629	12.7782	82.6725	12.398	6.39402	7.95506	14.8458	15.0057	15.8261	8.30319	2	163853650	163859746	+	protein_coding	Kcnk15
ENSMUSG00000005547	7.62157	-1.20142	0.324008	-3.708	0.000208902	0.000833855	7	26835304	26843548	+	protein_coding	Cyp2a5	ENSMUSG00000005547	3.41708	4.0713	11.1416	11.0341	21.1766	11.9039	8.32186	14.6872	13.8478	25.906	2.18477	4.25939	13.1524	0	0	3.61594	3.71144	0	0	0	7	26835304	26843548	+	protein_coding	Cyp2a5
ENSMUSG00000061702	1373.51	-1.2006	0.108349	-11.0809	1.55e-28	2.18e-26	7	25669138	25675166	-	protein_coding	Tmem91	ENSMUSG00000061702	1279.7	1930.82	1829.45	2128.66	2022.36	1926.06	2228.18	1974.62	2415.05	1549.85	695.848	792.247	1154.6	814.451	801.993	1043.56	748.783	797.613	654.524	681.784	7	25669138	25675166	-	protein_coding	Tmem91
ENSMUSG00000085496	10.2495	-1.20005	0.298717	-4.01734	5.89e-05	0.00026496	2	124123635	124129956	-	lncRNA	4930517E11Rik	ENSMUSG00000085496	5.12562	11.1961	4.45665	22.9876	16.4707	23.8079	17.684	21.2149	20.3101	14.6425	4.36953	8.51879	4.6973	7.62952	0	8.67825	9.2786	1.15429	0	2.76773	2	124123635	124129956	-	lncRNA	4930517E11Rik
ENSMUSG00000005640	55.0979	-1.19901	0.23516	-5.09869	3.42e-07	2.38e-06	3	87796950	87816101	+	protein_coding	Insrr	ENSMUSG00000005640	31.608	66.1587	69.078	96.5481	72.9416	51.1869	108.184	60.3808	163.404	82.2233	36.0486	31.9455	61.0649	30.5181	15.5283	24.5884	39.898	8.08001	35.0436	17.529	3	87796950	87816101	+	protein_coding	Insrr
ENSMUSG00000087196	16.9171	-1.19855	0.213845	-5.60477	2.09e-08	1.79e-07	2	28315015	28324050	-	lncRNA	Gm13373	ENSMUSG00000087196	29.0452	21.3743	23.3974	31.2632	17.6472	27.3791	21.8449	31.0064	26.7724	14.6425	6.5543	9.58364	12.213	15.259	9.13432	12.2942	4.6393	3.46286	7.91307	12.9161	2	28315015	28324050	-	lncRNA	Gm13373
ENSMUSG00000068220	974.184	-1.19828	0.116421	-10.2926	7.61e-25	6.98e-23	15	78926724	78930465	+	protein_coding	Lgals1	ENSMUSG00000068220	1313.87	1410.71	1783.77	1279.95	1336.48	1499.9	1892.18	1023.21	1124.44	1019.34	774.499	751.783	564.616	556.001	527.964	479.473	551.149	631.395	525.654	437.301	15	78926724	78930465	+	protein_coding	Lgals1
ENSMUSG00000043822	501.058	-1.19655	0.103339	-11.5789	5.27e-31	9.94e-29	10	80339109	80348412	-	protein_coding	Adamtsl5	ENSMUSG00000043822	752.612	544.537	652.899	644.574	711.769	736.854	823.864	660.109	766.243	725.368	347.378	401.448	294.051	347.143	280.424	183.69	267.224	332.435	293.914	254.631	10	80339109	80348412	-	protein_coding	Adamtsl5
ENSMUSG00000109868	68.1844	-1.19401	0.192815	-6.19253	5.92e-10	6.56e-09	8	108526936	108537221	-	lncRNA	Gm39244	ENSMUSG00000109868	52.9647	75.3191	84.6763	82.7555	140.001	99.9931	107.144	114.234	157.865	59.6964	37.141	45.7885	77.9752	32.4255	32.8835	35.4362	43.6094	30.0115	21.4783	32.2902	8	108526936	108537221	-	lncRNA	Gm39244
ENSMUSG00000024207	5.04852	-1.19329	0.32407	-3.6822	0.000231232	0.000913266	17	56843102	56874447	-	protein_coding	Acsbg2	ENSMUSG00000024207	0	4.0713	14.4841	11.9536	12.9412	14.2847	10.4023	3.26383	9.23185	2.25269	4.36953	2.1297	1.87892	1.90738	1.82686	0	3.71144	0	2.26088	0	17	56843102	56874447	-	protein_coding	Acsbg2
ENSMUSG00000095186	3.19543	-1.19287	0.326521	-3.65327	0.000258917	0.00100961	9	3023546	3025218	+	protein_coding	Gm10718	ENSMUSG00000095186	1.70854	1.01783	2.22832	9.19506	9.41182	2.38079	11.4426	8.97553	4.61592	3.37904	0	2.1297	0	0	0	0.723187	1.85572	1.15429	0	3.69031	9	3023546	3025218	+	protein_coding	Gm10718
ENSMUSG00000035582	12.8888	-1.19286	0.316661	-3.76699	0.000165225	0.000675433	7	97919954	98049663	+	protein_coding	Gdpd4	ENSMUSG00000035582	9.39697	44.7843	63.5072	8.27555	32.9414	8.33276	11.4426	6.52766	12.9246	6.75808	2.18477	4.25939	22.5471	1.90738	1.82686	2.89275	5.56716	4.61715	3.39132	3.69031	7	97919954	98049663	+	protein_coding	Gdpd4
ENSMUSG00000050100	2.63141	-1.19188	0.302339	-3.94221	8.07e-05	0.000353604	7	131548772	131558014	+	protein_coding	Hmx2	ENSMUSG00000050100	0	2.03565	6.68497	1.83901	4.70591	4.76158	1.04023	5.7117	25.8492	0	0	0	0	0	0	0	0	0	0	0	7	131548772	131558014	+	protein_coding	Hmx2
ENSMUSG00000079363	45.1849	-1.19103	0.209378	-5.68843	1.28e-08	1.14e-07	5	105115766	105139586	-	protein_coding	Gbp4	ENSMUSG00000079363	64.0702	41.7309	130.357	79.997	31.7649	59.5197	69.6956	53.0372	80.3171	38.2958	28.402	24.4915	33.8206	33.3792	19.1821	14.4637	38.9701	19.6229	15.8261	26.7547	5	105115766	105139586	-	protein_coding	Gbp4
ENSMUSG00000097926	29.5709	-1.18891	0.204273	-5.82022	5.88e-09	5.54e-08	18	5572823	5575055	-	lncRNA	Gm26575	ENSMUSG00000097926	44.422	55.9804	56.8222	40.4583	32.9414	46.4254	39.5288	42.4298	36.9274	25.906	18.5705	26.6212	14.0919	14.3054	11.8746	10.8478	15.7736	38.0915	10.1739	9.22577	18	5572823	5575055	-	lncRNA	Gm26575
ENSMUSG00000034185	11.8148	-1.1845	0.323506	-3.66144	0.000250798	0.000981699	4	115890664	115899227	+	protein_coding	6430628N08Rik	ENSMUSG00000034185	1.70854	12.2139	11.1416	20.2291	24.706	7.14236	12.4828	30.1904	59.0838	13.5162	2.18477	0	11.2735	1.90738	16.4418	1.44637	1.85572	6.92573	0	1.84515	4	115890664	115899227	+	protein_coding	6430628N08Rik
ENSMUSG00000104764	21.7251	-1.18321	0.28218	-4.19311	2.75e-05	0.000133191	3	103601942	103603202	+	lncRNA	Gm43066	ENSMUSG00000104764	5.97989	49.8735	26.7399	21.1486	22.3531	30.9502	60.3335	22.0308	51.6984	34.9168	3.27715	22.3618	13.1524	5.72214	1.82686	19.5261	7.42288	13.8515	5.65219	15.6838	3	103601942	103603202	+	lncRNA	Gm43066
ENSMUSG00000027377	39.6884	-1.1819	0.246591	-4.79296	1.64e-06	1.01e-05	2	127704385	127729932	-	protein_coding	Mall	ENSMUSG00000027377	116.181	65.1409	40.1098	71.7215	28.2354	48.8062	65.5347	35.9021	52.6215	54.0647	4.36953	40.4642	22.5471	9.5369	21.9224	13.0174	38.9701	11.5429	32.7827	20.2967	2	127704385	127729932	-	protein_coding	Mall
ENSMUSG00000001496	113.487	-1.17829	0.279445	-4.21653	2.48e-05	0.00012127	12	56531957	56536908	-	protein_coding	Nkx2-1	ENSMUSG00000001496	40.1507	214.761	82.448	132.409	160.001	116.659	211.167	217.861	428.358	90.1078	28.402	66.0206	125.888	41.9624	47.4985	89.6752	60.3109	39.2458	56.5219	20.2967	12	56531957	56536908	-	protein_coding	Nkx2-1
ENSMUSG00000091060	7.22143	-1.17799	0.299738	-3.93007	8.49e-05	0.000370088	1	162647192	162658219	-	protein_coding	Myocos	ENSMUSG00000091060	2.56281	8.14261	17.8266	13.7926	10.5883	7.14236	12.4828	5.7117	19.3869	13.5162	1.09238	6.38909	6.57622	3.81476	5.48059	5.06231	2.78358	1.15429	0	0.922577	1	162647192	162658219	-	protein_coding	Myocos
ENSMUSG00000085784	2.82095	-1.17521	0.325142	-3.61445	0.000300991	0.00115855	11	44659521	44662676	-	lncRNA	Gm12158	ENSMUSG00000085784	1.70854	2.03565	6.68497	3.67802	5.88238	10.7135	5.20116	4.89574	2.76955	3.37904	1.09238	0	0.939461	1.90738	3.65373	0.723187	0	1.15429	0	0	11	44659521	44662676	-	lncRNA	Gm12158
ENSMUSG00000093930	13615.1	-1.17429	0.104591	-11.2274	2.99e-29	4.61e-27	13	119690378	119708260	+	protein_coding	Hmgcs1	ENSMUSG00000093930	21687.3	18253.7	19047.7	18602.5	21651.9	18809.4	18538	17197.9	16273.9	19898	10980.6	12726	8584.79	7505.54	6209.51	7575.39	7008.13	7845.69	6678.63	7227.47	13	119690378	119708260	+	protein_coding	Hmgcs1
ENSMUSG00000045075	84.0308	-1.17369	0.183875	-6.38309	1.74e-10	2.09e-09	11	95696893	95699143	-	lncRNA	Gm9796	ENSMUSG00000045075	170	63.1052	171.581	105.743	95.2946	92.8507	127.949	121.578	155.095	86.7287	65.543	42.5939	57.3071	61.9899	23.7492	31.8202	53.8159	76.183	36.174	41.516	11	95696893	95699143	-	lncRNA	Gm9796
ENSMUSG00000117926	85.5206	-1.17337	0.144787	-8.10415	5.31e-16	1.53e-14	18	42615634	42622459	-	lncRNA	C030004G16Rik	ENSMUSG00000117926	105.929	84.4796	122.558	126.892	103.53	110.707	159.156	115.05	154.172	116.014	61.1734	73.4746	58.2466	57.2214	31.0567	35.4362	47.3209	49.6344	63.3045	35.0579	18	42615634	42622459	-	lncRNA	C030004G16Rik
ENSMUSG00000061100	12.7288	-1.17274	0.266003	-4.40875	1.04e-05	5.44e-05	16	48842550	48844461	+	protein_coding	Retnla	ENSMUSG00000061100	6.83416	22.3922	17.8266	23.9072	18.8236	11.9039	24.9656	9.79149	24.0028	27.0323	4.36953	2.1297	13.1524	3.81476	5.48059	4.33912	9.2786	13.8515	7.91307	2.76773	16	48842550	48844461	+	protein_coding	Retnla
ENSMUSG00000055972	70.2473	-1.17214	0.177293	-6.61131	3.81e-11	5.18e-10	16	87784074	87839293	+	lncRNA	2810407A14Rik	ENSMUSG00000055972	85.427	115.014	105.845	134.248	118.824	98.8027	84.2589	88.1234	88.6258	74.3389	71.0049	58.5667	59.186	31.4718	16.4418	38.3289	37.1144	21.9315	39.5653	37.8256	16	87784074	87839293	+	lncRNA	2810407A14Rik
ENSMUSG00000037735	689.814	-1.17195	0.11739	-9.98342	1.8e-23	1.44e-21	12	5375869	5416631	+	lncRNA	2810032G03Rik	ENSMUSG00000037735	939.697	942.507	887.987	978.354	856.475	984.456	978.859	1109.7	922.262	1033.99	632.49	564.37	441.546	460.632	263.982	338.452	308.977	442.092	321.044	388.405	12	5375869	5416631	+	lncRNA	2810032G03Rik
ENSMUSG00000038805	872.341	-1.17074	0.30445	-3.84544	0.000120338	0.000506834	17	85613607	85629302	+	protein_coding	Six3	ENSMUSG00000038805	277.638	1566.43	837.85	1473.97	1858.83	988.027	1386.63	1525.02	2512.91	970.911	193.352	560.11	1166.81	191.692	138.842	569.872	758.061	211.235	157.131	101.483	17	85613607	85629302	+	protein_coding	Six3
ENSMUSG00000063239	3330.12	-1.1692	0.126643	-9.23225	2.65e-20	1.38e-18	17	27422386	27521403	-	protein_coding	Grm4	ENSMUSG00000063239	4286.73	5651.99	3868.37	4309.72	5450.62	4136.62	4114.12	4576.7	5804.99	4367.97	2496.09	2563.09	2975.27	1778.63	1540.96	2272.25	1810.25	1953.05	1284.18	1360.8	17	27422386	27521403	-	protein_coding	Grm4
ENSMUSG00000103284	27.5857	-1.16688	0.227265	-5.13445	2.83e-07	2e-06	3	51829384	51830405	-	TEC	3110080O07Rik	ENSMUSG00000103284	12.814	58.0161	32.3107	45.0558	58.8238	45.235	57.2128	44.0617	20.3101	23.6533	12.0162	19.1673	25.3654	20.0275	16.4418	12.2942	12.0622	9.2343	14.6957	12.9161	3	51829384	51830405	-	TEC	3110080O07Rik
ENSMUSG00000035486	1343.58	-1.16525	0.149746	-7.78149	7.17e-15	1.76e-13	10	80356458	80365489	+	protein_coding	Plk5	ENSMUSG00000035486	1401.86	988.309	1896.3	1772.81	1502.36	2029.62	2397.74	2717.95	2568.3	1580.27	746.097	554.786	1338.73	771.535	848.578	843.237	707.029	692.573	870.438	643.036	10	80356458	80365489	+	protein_coding	Plk5
ENSMUSG00000063796	1171.18	-1.1651	0.136619	-8.52812	1.49e-17	5.31e-16	19	8591253	8611835	+	protein_coding	Slc22a8	ENSMUSG00000063796	1918.69	1608.17	2084.6	1593.5	1332.95	1302.29	1753.83	1076.25	1918.38	1801.03	1001.71	863.592	883.093	847.831	508.782	472.241	503.828	797.613	587.828	567.385	19	8591253	8611835	+	protein_coding	Slc22a8
ENSMUSG00000024670	366.448	-1.16413	0.204468	-5.69345	1.24e-08	1.11e-07	19	10789340	10830058	-	protein_coding	Cd6	ENSMUSG00000024670	477.537	317.562	445.665	520.44	617.65	638.051	752.088	528.74	439.436	482.077	369.225	319.455	120.251	199.321	164.418	146.807	90.9303	325.509	186.522	187.283	19	10789340	10830058	-	protein_coding	Cd6
ENSMUSG00000037679	14240.5	-1.16312	0.110955	-10.4828	1.04e-25	1.05e-23	12	112588783	112615557	+	protein_coding	Inf2	ENSMUSG00000037679	22281.9	19670.5	15571.5	17979.1	20994.2	18665.4	20541.5	19495.7	22903.3	20277.6	10737	11195.8	11266	7160.31	5358.19	7071.33	9123.65	8450.54	9386.03	6679.46	12	112588783	112615557	+	protein_coding	Inf2
ENSMUSG00000060204	7.10599	-1.16129	0.311546	-3.72752	0.00019337	0.000777927	5	72581637	72587551	-	protein_coding	Slc10a4l	ENSMUSG00000060204	8.5427	12.2139	8.91329	1.83901	15.2942	7.14236	18.7242	5.7117	24.926	7.88443	2.18477	4.25939	1.87892	3.81476	1.82686	7.23187	7.42288	2.30858	0	0	5	72581637	72587551	-	protein_coding	Slc10a4l
ENSMUSG00000007721	8308.36	-1.15898	0.0931356	-12.4439	1.51e-35	4.51e-33	8	70868226	70873935	-	protein_coding	Ccdc124	ENSMUSG00000007721	8860.49	10279	10844.1	11941.6	13163.6	13584.8	13852.8	12352.8	10376.6	10113.5	5831.14	6277.28	5394.38	5156.6	4378.08	4211.12	3956.39	5282.02	5840.97	4469.88	8	70868226	70873935	-	protein_coding	Ccdc124
ENSMUSG00000045010	26.4045	-1.15798	0.294112	-3.93721	8.24e-05	0.00036033	X	101790052	101794423	-	protein_coding	Gm4779	ENSMUSG00000045010	11.9598	88.5509	17.8266	22.9876	16.4707	40.4734	60.3335	93.0191	35.081	11.2635	7.64668	9.58364	11.2735	7.62952	14.6149	14.4637	6.49502	8.08001	42.9567	7.38061	X	101790052	101794423	-	protein_coding	Gm4779
ENSMUSG00000074218	71.5224	-1.15775	0.147558	-7.84607	4.29e-15	1.1e-13	7	30184143	30186078	+	protein_coding	Cox7a1	ENSMUSG00000074218	87.1355	113.997	110.302	106.663	100.001	101.183	115.466	119.13	80.3171	65.3281	41.5105	73.4746	43.2152	53.4067	34.7104	26.0347	40.8258	42.7086	41.8262	33.2128	7	30184143	30186078	+	protein_coding	Cox7a1
ENSMUSG00000071230	14.4169	-1.15732	0.255105	-4.53664	5.72e-06	3.15e-05	17	24657329	24658457	-	protein_coding	Npw	ENSMUSG00000071230	25.6281	20.3565	22.2832	11.0341	25.8825	26.1887	22.8851	22.8468	25.8492	6.75808	4.36953	10.6485	5.63676	7.62952	7.30746	10.1246	3.71144	20.7772	5.65219	2.76773	17	24657329	24658457	-	protein_coding	Npw
ENSMUSG00000115971	15.9806	-1.1573	0.321574	-3.59885	0.000319628	0.00122221	15	79843162	79846763	+	lncRNA	Gm10856	ENSMUSG00000115971	3.41708	34.6061	45.6806	42.2973	11.7648	23.8079	49.9312	8.15957	36.0042	0	4.36953	10.6485	3.75784	7.62952	7.30746	0	1.85572	2.30858	11.3044	14.7612	15	79843162	79846763	+	lncRNA	Gm10856
ENSMUSG00000032987	1.64179	-1.15725	0.303028	-3.81894	0.000134025	0.000558558	15	98452587	98460395	+	protein_coding	Olfr281	ENSMUSG00000032987	1.70854	6.10696	1.11416	0	5.88238	3.57118	7.28163	1.63191	5.53911	0	0	0	0	0	0	0	0	0	0	0	15	98452587	98460395	+	protein_coding	Olfr281
ENSMUSG00000109307	14.528	-1.1561	0.251948	-4.58865	4.46e-06	2.52e-05	7	28887126	28888483	-	lncRNA	Gm44700	ENSMUSG00000109307	16.2311	10.1783	18.9407	17.4706	29.4119	29.7598	26.0058	18.767	12.9246	31.5377	13.1086	17.0376	8.45515	9.5369	5.48059	4.33912	1.85572	5.77144	4.52175	9.22577	7	28887126	28888483	-	lncRNA	Gm44700
ENSMUSG00000073530	192.971	-1.15605	0.155864	-7.41705	1.2e-13	2.39e-12	1	158711726	158980490	-	protein_coding	Pappa2	ENSMUSG00000073530	322.06	320.615	249.572	297.92	215.295	264.267	226.771	306.8	279.725	220.764	156.211	123.522	155.95	100.137	156.197	51.3463	78.8681	77.3373	158.261	97.7931	1	158711726	158980490	-	protein_coding	Pappa2
ENSMUSG00000030093	900.343	-1.15556	0.137608	-8.39751	4.56e-17	1.52e-15	6	91363980	91411363	-	protein_coding	Wnt7a	ENSMUSG00000030093	1116.53	1551.17	1245.63	1270.76	1342.36	1090.4	1202.51	1155.4	1490.94	1111.7	742.82	730.486	883.093	402.457	514.262	468.625	559.499	401.692	343.653	382.869	6	91363980	91411363	-	protein_coding	Wnt7a
ENSMUSG00000032053	5.77909	-1.15384	0.311538	-3.70367	0.0002125	0.000846354	9	51213707	51240080	+	protein_coding	Pou2af1	ENSMUSG00000032053	5.12562	14.2496	4.45665	5.51704	17.6472	7.14236	16.6437	4.89574	7.38548	6.75808	2.18477	8.51879	1.87892	5.72214	0	1.44637	1.85572	2.30858	0	1.84515	9	51213707	51240080	+	protein_coding	Pou2af1
ENSMUSG00000110020	156.395	-1.15208	0.236954	-4.86203	1.16e-06	7.33e-06	7	45830894	45835249	+	lncRNA	Gm45441	ENSMUSG00000110020	92.2611	139.442	218.376	328.264	195.295	248.792	285.024	367.181	204.024	173.457	111.423	103.29	65.7622	81.0637	108.698	67.9796	21.3408	121.2	142.435	52.5869	7	45830894	45835249	+	lncRNA	Gm45441
ENSMUSG00000071015	8.82168	-1.15199	0.296832	-3.88094	0.000104051	0.000444451	4	34743783	34756263	-	protein_coding	Gm136	ENSMUSG00000071015	5.12562	13.2317	13.3699	18.3901	21.1766	7.14236	15.6035	4.89574	19.3869	15.7689	3.27715	4.25939	12.213	2.86107	3.65373	3.61594	9.2786	0	2.26088	0.922577	4	34743783	34756263	-	protein_coding	Gm136
ENSMUSG00000062296	27107.9	-1.15111	0.0751548	-15.3165	5.93e-53	6.26e-50	9	111311738	111395775	+	protein_coding	Trank1	ENSMUSG00000062296	35811.8	34246.8	37175.1	44002	30270.8	42772	42673.5	36999.6	37836.7	33298.2	15762	18599.7	18107.2	16729.6	15494.5	18488.3	15232.7	17616.7	18120.9	12920.7	9	111311738	111395775	+	protein_coding	Trank1
ENSMUSG00000102185	27.7322	-1.14518	0.234773	-4.87782	1.07e-06	6.81e-06	1	185487293	185498159	+	transcribed_processed_pseudogene	5033404E19Rik	ENSMUSG00000102185	41.8592	32.5704	45.6806	50.5728	38.8237	35.7118	41.6093	26.1106	56.3143	29.285	2.18477	44.7236	15.9708	12.398	9.13432	19.5261	12.99	12.6972	13.5653	12.9161	1	185487293	185498159	+	transcribed_processed_pseudogene	5033404E19Rik
ENSMUSG00000080186	29.902	-1.14459	0.20613	-5.55275	2.81e-08	2.37e-07	X	5885742	5885952	-	processed_pseudogene	Gm14448	ENSMUSG00000080186	18.7939	39.6952	47.909	36.7802	51.765	52.3773	64.4944	46.5096	34.1578	32.6641	18.5705	21.297	9.39461	27.657	8.22089	20.2492	24.1244	17.3143	11.3044	14.7612	X	5885742	5885952	-	processed_pseudogene	Gm14448
ENSMUSG00000085264	5.81228	-1.14328	0.305721	-3.73963	0.000184289	0.000745751	6	17206822	17385604	-	lncRNA	Gm15581	ENSMUSG00000085264	11.9598	2.03565	11.1416	11.9536	4.70591	9.52315	11.4426	13.0553	7.38548	5.63174	0	7.45394	4.6973	1.90738	5.48059	1.44637	1.85572	2.30858	2.26088	0	6	17206822	17385604	-	lncRNA	Gm15581
ENSMUSG00000039079	142.104	-1.14262	0.137523	-8.30864	9.68e-17	3.09e-15	8	122356966	122360746	-	protein_coding	Trhr2	ENSMUSG00000039079	306.683	225.957	148.184	133.328	212.942	157.132	185.161	208.069	253.876	146.425	93.9449	104.355	92.0671	78.2026	100.478	84.6129	71.4452	80.8001	93.8264	64.5804	8	122356966	122360746	-	protein_coding	Trhr2
ENSMUSG00000116004	48.0401	-1.14167	0.212738	-5.36654	8.03e-08	6.28e-07	15	85646082	85667675	+	lncRNA	Gm49539	ENSMUSG00000116004	13.6683	67.1765	73.5347	76.319	54.1179	76.1852	127.949	40.7979	87.7026	66.4545	22.94	29.8158	26.3049	32.4255	22.8358	31.8202	31.5472	21.9315	30.5218	26.7547	15	85646082	85667675	+	lncRNA	Gm49539
ENSMUSG00000083808	22.8442	-1.1394	0.277191	-4.11052	3.95e-05	0.000184759	10	80954453	80954710	-	processed_pseudogene	Gm3828	ENSMUSG00000083808	15.3769	50.8913	25.6257	39.5388	21.1766	29.7598	40.5691	34.2702	48.0056	32.6641	2.18477	14.9079	37.5784	11.4443	2.7403	17.3565	13.9179	9.2343	2.26088	7.38061	10	80954453	80954710	-	processed_pseudogene	Gm3828
ENSMUSG00000027971	884.848	-1.13828	0.294962	-3.85908	0.000113815	0.000482311	3	125404075	125728899	+	protein_coding	Ndst4	ENSMUSG00000027971	932.008	1609.18	2085.71	1158.58	1260.01	1038.02	991.342	1622.94	1431.86	1171.4	155.118	136.301	1118.9	539.789	306.913	925.68	796.104	110.812	160.522	145.767	3	125404075	125728899	+	protein_coding	Ndst4
ENSMUSG00000084399	30.9017	-1.13822	0.200078	-5.68887	1.28e-08	1.14e-07	10	105505803	105508599	-	transcribed_processed_pseudogene	Gm15666	ENSMUSG00000084399	16.2311	37.6596	54.5939	39.5388	48.2356	38.0926	64.4944	45.6936	43.3897	49.5593	22.94	29.8158	8.45515	20.9812	18.2686	20.2492	18.5572	15.0057	12.4348	13.8387	10	105505803	105508599	-	transcribed_processed_pseudogene	Gm15666
ENSMUSG00000097464	192.48	-1.13703	0.19973	-5.69283	1.25e-08	1.11e-07	6	4946567	4947803	+	TEC	Gm26736	ENSMUSG00000097464	70.0501	222.904	181.608	346.654	231.766	498.775	434.817	244.787	214.179	275.955	115.793	158.662	95.825	108.721	76.7283	100.523	140.107	121.2	81.3916	129.161	6	4946567	4947803	+	TEC	Gm26736
ENSMUSG00000041445	193.645	-1.13651	0.176149	-6.45197	1.1e-10	1.38e-09	14	34375464	34404287	+	protein_coding	Mmrn2	ENSMUSG00000041445	374.17	264.635	355.418	248.267	257.648	208.319	314.15	189.302	258.492	245.544	126.716	218.294	103.341	60.0825	119.66	97.6303	86.291	76.183	192.175	76.5739	14	34375464	34404287	+	protein_coding	Mmrn2
ENSMUSG00000050473	415.431	-1.13549	0.259026	-4.38369	1.17e-05	6.04e-05	10	19847915	19851459	-	protein_coding	Slc35d3	ENSMUSG00000050473	179.397	739.96	452.35	710.778	942.358	419.019	642.864	539.348	928.724	485.456	135.455	353.53	506.369	154.498	160.764	292.891	305.266	161.6	98.3481	99.6383	10	19847915	19851459	-	protein_coding	Slc35d3
ENSMUSG00000037139	331.644	-1.13402	0.12719	-8.916	4.83e-19	2.07e-17	4	135759714	135815564	+	protein_coding	Myom3	ENSMUSG00000037139	395.527	370.489	512.514	562.738	434.12	544.01	539.881	353.309	420.049	469.687	250.156	204.451	259.291	275.616	162.591	170.672	179.077	247.018	122.087	159.606	4	135759714	135815564	+	protein_coding	Myom3
ENSMUSG00000112060	4.99698	-1.1339	0.318338	-3.56194	0.000368127	0.00138893	10	10122485	10126891	+	lncRNA	Gm48279	ENSMUSG00000112060	0	6.10696	5.57081	12.8731	10.5883	11.9039	11.4426	6.52766	2.76955	11.2635	3.27715	2.1297	4.6973	1.90738	1.82686	3.61594	0	2.30858	1.13044	0	10	10122485	10126891	+	lncRNA	Gm48279
ENSMUSG00000089862	1708.74	-1.13354	0.0787317	-14.3975	5.37e-47	3.7e-44	6	8259287	8459470	+	protein_coding	Umad1	ENSMUSG00000089862	1991.3	2020.38	2474.55	2682.2	2444.72	2577.2	2567.29	2478.88	2091.01	2231.29	1340.35	1218.19	1161.17	990.884	1042.23	955.331	905.591	1136.97	912.264	953.022	6	8259287	8459470	+	protein_coding	Umad1
ENSMUSG00000038954	316.438	-1.13314	0.0978205	-11.5839	4.97e-31	9.43e-29	17	44777151	45119290	+	protein_coding	Supt3	ENSMUSG00000038954	416.029	512.984	385.5	445.96	415.296	417.828	409.852	503.446	433.897	426.886	206.46	276.861	240.502	196.46	171.725	135.959	184.644	204.309	180.87	163.296	17	44777151	45119290	+	protein_coding	Supt3
ENSMUSG00000029193	15.8198	-1.13288	0.317637	-3.56659	0.000361662	0.00136714	5	53697775	53707705	-	protein_coding	Cckar	ENSMUSG00000029193	3.41708	24.4278	17.8266	18.3901	28.2354	4.76158	29.1265	57.117	62.7766	2.25269	4.36953	4.25939	22.5471	3.81476	5.48059	10.1246	5.56716	0	4.52175	7.38061	5	53697775	53707705	-	protein_coding	Cckar
ENSMUSG00000112595	246.843	-1.13246	0.247905	-4.56811	4.92e-06	2.75e-05	10	110139738	110140169	-	processed_pseudogene	Gm47340	ENSMUSG00000112595	82.8642	261.581	210.577	501.131	270.59	586.864	700.077	344.334	345.271	257.934	182.428	242.785	88.3093	136.378	73.988	108.478	146.602	99.2687	132.261	165.141	10	110139738	110140169	-	processed_pseudogene	Gm47340
ENSMUSG00000107265	3.79599	-1.13129	0.326537	-3.46449	0.00053123	0.00193072	5	31135752	31137344	-	lncRNA	Gm15469	ENSMUSG00000107265	3.41708	0	8.91329	6.43654	3.52943	8.33276	13.523	8.15957	10.155	1.12635	0	1.06485	2.81838	3.81476	0	0	2.78358	0	0	1.84515	5	31135752	31137344	-	lncRNA	Gm15469
ENSMUSG00000072941	1308.63	-1.13118	0.11692	-9.67487	3.86e-22	2.59e-20	5	52363790	52371418	+	protein_coding	Sod3	ENSMUSG00000072941	1777.74	1799.52	2001.03	1975.1	1956.48	1767.74	2149.12	1544.61	1635.88	1508.18	1059.61	1125.54	747.811	679.027	604.692	608.201	647.646	809.156	1131.57	643.959	5	52363790	52371418	+	protein_coding	Sod3
ENSMUSG00000038216	33.2556	-1.12967	0.190725	-5.92303	3.16e-09	3.13e-08	11	98386449	98388181	+	protein_coding	Pnmt	ENSMUSG00000038216	30.7537	60.0517	33.4249	44.1363	58.8238	33.331	48.8909	63.6447	49.852	45.0539	17.4781	13.843	26.3049	26.7033	5.48059	24.5884	18.5572	25.3943	20.3479	18.4515	11	98386449	98388181	+	protein_coding	Pnmt
ENSMUSG00000111531	10.612	-1.1292	0.294114	-3.83933	0.000123372	0.000518319	10	93317402	93322725	+	lncRNA	Gm32688	ENSMUSG00000111531	12.814	6.10696	8.91329	31.2632	23.5295	21.4271	4.16093	10.6074	12.9246	27.0323	10.9238	12.7782	3.75784	5.72214	1.82686	1.44637	4.6393	2.30858	4.52175	5.53546	10	93317402	93322725	+	lncRNA	Gm32688
ENSMUSG00000071234	3297.78	-1.12763	0.262306	-4.29891	1.72e-05	8.63e-05	12	84677276	84698831	-	protein_coding	Syndig1l	ENSMUSG00000071234	1121.66	5040.27	2432.21	4435.7	7700.04	4555.64	5104.42	4424.94	7862.77	5283.69	1399.34	3087	3702.41	1141.57	844.925	1369.72	2976.57	1281.26	1432.27	759.281	12	84677276	84698831	-	protein_coding	Syndig1l
ENSMUSG00000087368	93.8079	-1.12703	0.171165	-6.58447	4.56e-11	6.13e-10	X	136741823	136803364	+	lncRNA	BC065397	ENSMUSG00000087368	159.748	141.478	102.503	148.04	123.53	153.561	137.311	144.424	89.5489	111.508	66.6353	96.9012	55.4282	49.5919	39.2776	49.8999	91.8581	50.7887	22.6088	41.516	X	136741823	136803364	+	lncRNA	BC065397
ENSMUSG00000113271	6.07855	-1.12688	0.319131	-3.5311	0.000413834	0.00154226	13	3273234	3282998	+	lncRNA	Gm40653	ENSMUSG00000113271	4.27135	10.1783	4.45665	10.1146	3.52943	11.9039	24.9656	2.44787	11.0782	12.3898	3.27715	6.38909	0	1.90738	3.65373	0	0	5.77144	3.39132	1.84515	13	3273234	3282998	+	lncRNA	Gm40653
ENSMUSG00000007944	13808.7	-1.12622	0.0836785	-13.4589	2.73e-41	1.28e-38	7	27653914	27657346	+	protein_coding	Ttc9b	ENSMUSG00000007944	16616.4	18046.1	17591.5	18842.5	20620.1	21616.4	22148.6	19446.7	20099.6	15161.8	9810.69	9166.22	6672.05	9661.84	8344.2	8897.37	6598.01	9458.23	9595.16	7781.01	7	27653914	27657346	+	protein_coding	Ttc9b
ENSMUSG00000086455	11.266	-1.12576	0.292978	-3.84248	0.000121799	0.000512285	4	10487955	10489362	-	lncRNA	Gm11815	ENSMUSG00000086455	25.6281	14.2496	16.7124	7.35605	9.41182	29.7598	23.9254	13.0553	5.53911	22.5269	3.27715	3.19455	2.81838	2.86107	8.22089	5.7855	1.85572	8.08001	19.2175	1.84515	4	10487955	10489362	-	lncRNA	Gm11815
ENSMUSG00000084458	2.95112	-1.12518	0.322691	-3.48688	0.000488695	0.00179079	15	50889024	50889114	-	miRNA	Mir1907	ENSMUSG00000084458	1.70854	2.03565	3.34249	2.75852	3.52943	8.33276	7.28163	6.52766	7.38548	4.50539	1.09238	2.1297	2.81838	0.95369	0.913432	1.44637	0	0	2.26088	0	15	50889024	50889114	-	miRNA	Mir1907
ENSMUSG00000110929	1.82919	-1.12457	0.31823	-3.53382	0.000409598	0.00152764	9	99848282	99858313	-	lncRNA	Gm47757	ENSMUSG00000110929	8.5427	4.0713	0	0.919506	2.35295	2.38079	5.20116	2.44787	0.923185	6.75808	0	0	0	0	0	0	1.85572	0	1.13044	0	9	99848282	99858313	-	lncRNA	Gm47757
ENSMUSG00000084331	16.9318	-1.12273	0.220128	-5.10032	3.39e-07	2.36e-06	X	60726388	60727448	-	processed_pseudogene	Gm8163	ENSMUSG00000084331	29.0452	18.3209	17.8266	25.7462	28.2354	42.8542	16.6437	17.1351	24.0028	20.2742	15.2934	10.6485	7.51568	15.259	10.9612	7.23187	5.56716	9.2343	11.3044	5.53546	X	60726388	60727448	-	processed_pseudogene	Gm8163
ENSMUSG00000109863	15.5225	-1.1222	0.251101	-4.46909	7.86e-06	4.22e-05	8	90893154	90894638	+	TEC	Gm45643	ENSMUSG00000109863	16.2311	24.4278	31.1965	19.3096	18.8236	40.4734	23.9254	32.6383	10.155	6.75808	10.9238	10.6485	13.1524	11.4443	4.56716	7.23187	4.6393	9.2343	4.52175	10.1483	8	90893154	90894638	+	TEC	Gm45643
ENSMUSG00000106637	66.0126	-1.12025	0.193605	-5.7863	7.2e-09	6.69e-08	5	9599871	9602607	-	TEC	Gm42455	ENSMUSG00000106637	40.1507	50.8913	82.448	103.904	96.4711	171.417	117.546	83.2276	90.4721	91.2341	61.1734	55.3721	28.1838	40.055	28.3164	39.0521	38.0423	45.0172	30.5218	26.7547	5	9599871	9602607	-	TEC	Gm42455
ENSMUSG00000115481	20.0426	-1.11981	0.309359	-3.61976	0.000294874	0.00113721	15	13452315	13453112	+	processed_pseudogene	Gm4940	ENSMUSG00000115481	6.83416	14.2496	4.45665	46.8948	16.4707	73.8044	69.6956	22.0308	32.3115	20.2742	10.9238	14.9079	9.39461	29.5644	10.0478	3.61594	1.85572	3.46286	4.52175	5.53546	15	13452315	13453112	+	processed_pseudogene	Gm4940
ENSMUSG00000038201	3.41207	-1.11883	0.322555	-3.46865	0.000523087	0.00190482	7	45405652	45409763	+	protein_coding	Kcna7	ENSMUSG00000038201	5.12562	4.0713	4.45665	3.67802	4.70591	4.76158	10.4023	8.15957	7.38548	2.25269	2.18477	0	0	1.90738	1.82686	5.06231	0	0	2.26088	0	7	45405652	45409763	+	protein_coding	Kcna7
ENSMUSG00000109953	12.3813	-1.11847	0.304455	-3.67368	0.000239078	0.000940843	8	27279440	27281070	+	TEC	5430430B14Rik	ENSMUSG00000109953	23.0653	27.4813	30.0824	7.35605	14.1177	9.52315	16.6437	23.6628	17.5405	18.0216	10.9238	20.2321	0	0	1.82686	4.33912	11.1343	3.46286	4.52175	3.69031	8	27279440	27281070	+	TEC	5430430B14Rik
ENSMUSG00000103223	4.19192	-1.11678	0.319639	-3.49387	0.000476065	0.00174849	2	11365240	11367451	-	TEC	Gm37730	ENSMUSG00000103223	0.85427	7.12478	12.2558	8.27555	4.70591	5.95197	8.32186	8.15957	3.69274	6.75808	4.36953	0	1.87892	0	1.82686	0	3.71144	0	2.26088	3.69031	2	11365240	11367451	-	TEC	Gm37730
ENSMUSG00000062393	116.578	-1.11677	0.28541	-3.91288	9.12e-05	0.000394565	X	6779305	6948363	+	protein_coding	Dgkk	ENSMUSG00000062393	52.9647	261.581	86.9046	85.5141	167.06	66.6621	108.184	385.132	409.894	100.245	48.0648	66.0206	111.796	57.2214	93.1701	52.0695	42.6816	30.0115	76.8698	29.5225	X	6779305	6948363	+	protein_coding	Dgkk
ENSMUSG00000104145	115.882	-1.11676	0.192822	-5.79169	6.97e-09	6.49e-08	1	137935188	137937346	+	TEC	D130019J16Rik	ENSMUSG00000104145	68.3416	128.246	92.4754	190.338	205.883	263.077	238.213	177.063	144.94	118.266	79.7439	101.161	95.825	78.2026	35.6238	49.1767	63.0945	58.8687	59.9132	69.1933	1	137935188	137937346	+	TEC	D130019J16Rik
ENSMUSG00000020867	6.98437	-1.11558	0.305342	-3.65355	0.000258644	0.00100879	11	94478903	94486179	-	protein_coding	Spata20	ENSMUSG00000020867	8.5427	8.14261	2.22832	11.0341	2.35295	19.0463	14.5633	17.1351	9.23185	13.5162	2.18477	8.51879	0	3.81476	3.65373	2.89275	0	4.61715	4.52175	3.69031	11	94478903	94486179	-	protein_coding	Spata20
ENSMUSG00000022219	38.418	-1.11505	0.194095	-5.74486	9.2e-09	8.37e-08	14	55754049	55758458	-	protein_coding	Cideb	ENSMUSG00000022219	46.1306	44.7843	67.9639	65.2849	54.1179	64.2813	56.1726	54.6691	34.1578	50.6856	26.2172	31.9455	19.7287	20.0275	12.788	19.5261	9.2786	16.16	48.6088	25.8321	14	55754049	55758458	-	protein_coding	Cideb
ENSMUSG00000020826	24.6363	-1.11332	0.236958	-4.69841	2.62e-06	1.55e-05	11	78920786	78960254	+	protein_coding	Nos2	ENSMUSG00000020826	66.633	36.6417	33.4249	33.1022	38.8237	35.7118	20.8047	22.8468	38.7738	24.7796	13.1086	6.38909	13.1524	22.8886	12.788	18.0797	9.2786	9.2343	31.6523	4.61288	11	78920786	78960254	+	protein_coding	Nos2
ENSMUSG00000092981	851.526	-1.11311	0.0790408	-14.0827	4.85e-45	2.98e-42	17	23823290	23823369	+	miRNA	Mir5125	ENSMUSG00000092981	1159.24	1098.23	1104.13	1316.73	923.534	1266.58	1373.11	1021.58	1225.07	1198.43	518.882	548.397	616.286	604.64	554.453	467.902	491.766	574.835	556.176	410.547	17	23823290	23823369	+	miRNA	Mir5125
ENSMUSG00000082373	24.7598	-1.1131	0.201499	-5.52412	3.31e-08	2.75e-07	1	63917847	63935932	+	unitary_pseudogene	Gm13754	ENSMUSG00000082373	49.5476	29.517	35.6532	31.2632	55.2944	39.283	33.2875	26.9266	14.771	32.6641	17.4781	21.297	12.213	14.3054	17.3552	9.40144	17.6293	11.5429	14.6957	11.0709	1	63917847	63935932	+	unitary_pseudogene	Gm13754
ENSMUSG00000110086	426.651	-1.11186	0.134316	-8.27793	1.25e-16	3.95e-15	13	56752370	56753827	-	protein_coding	Gm45623	ENSMUSG00000110086	521.959	542.501	492.459	520.44	676.474	483.3	500.352	837.172	718.238	607.101	191.167	235.332	341.024	258.45	318.788	357.255	231.965	292.035	266.783	140.232	13	56752370	56753827	-	protein_coding	Gm45623
ENSMUSG00000015467	72.6573	-1.11067	0.167024	-6.64975	2.94e-11	4.06e-10	17	34613348	34615971	-	protein_coding	Egfl8	ENSMUSG00000015467	82.0099	85.4974	148.184	124.133	115.295	89.2795	124.828	93.0191	70.1621	78.8443	65.543	40.4642	31.9417	54.3603	39.2776	42.6681	51.0323	62.3315	19.2175	35.0579	17	34613348	34615971	-	protein_coding	Egfl8
ENSMUSG00000083538	9.49947	-1.11062	0.279299	-3.97645	7e-05	0.000310142	3	57528231	57528781	+	processed_pseudogene	Gm16016	ENSMUSG00000083538	10.2512	13.2317	26.7399	15.6316	18.8236	10.7135	21.8449	3.26383	8.30866	11.2635	4.36953	0	5.63676	5.72214	5.48059	4.33912	9.2786	4.61715	6.78263	3.69031	3	57528231	57528781	+	processed_pseudogene	Gm16016
ENSMUSG00000045518	9.20176	-1.11025	0.326408	-3.40143	0.000670342	0.00238797	10	80494834	80517276	+	protein_coding	Onecut3	ENSMUSG00000045518	6.83416	20.3565	5.57081	0.919506	28.2354	4.76158	0	53.8532	22.1564	9.01078	2.18477	2.1297	3.75784	0	9.13432	5.06231	1.85572	0	4.52175	3.69031	10	80494834	80517276	+	protein_coding	Onecut3
ENSMUSG00000022463	16201.1	-1.11019	0.106909	-10.3845	2.92e-25	2.83e-23	15	82147180	82205379	+	protein_coding	Srebf2	ENSMUSG00000022463	26808.7	22544.8	20158.5	19523.9	23067.2	20209.3	21416.3	20789.8	23299.3	25144.6	13476.7	15025	11658.7	8393.43	8610.01	8741.89	7763.4	10372.4	8830.98	8187.87	15	82147180	82205379	+	protein_coding	Srebf2
ENSMUSG00000051297	3.17594	-1.10925	0.325631	-3.40646	0.000658111	0.00234762	16	92478741	92497366	+	lncRNA	2410124H12Rik	ENSMUSG00000051297	0	7.12478	6.68497	3.67802	3.52943	4.76158	9.3621	4.89574	7.38548	4.50539	2.18477	4.25939	0	0	0	1.44637	1.85572	0	0	1.84515	16	92478741	92497366	+	lncRNA	2410124H12Rik
ENSMUSG00000074575	2417.51	-1.10852	0.10321	-10.7404	6.58e-27	7.73e-25	2	168260116	168281736	-	protein_coding	Kcng1	ENSMUSG00000074575	4133.81	4060.11	3293.46	2786.1	3114.13	2408.17	2703.57	3395.2	3320.7	4024.44	1762.01	1867.74	1783.1	1400.97	1688.94	1268.47	1372.3	1467.1	1312.44	1187.36	2	168260116	168281736	-	protein_coding	Kcng1
ENSMUSG00000004864	28.7231	-1.10841	0.231709	-4.78363	1.72e-06	1.05e-05	17	28769296	28780233	+	protein_coding	Mapk13	ENSMUSG00000004864	41.0049	29.517	22.2832	40.4583	45.8826	49.9965	62.414	57.933	29.5419	29.285	8.73906	12.7782	27.2444	10.4906	10.9612	17.3565	12.0622	8.08001	41.8262	16.6064	17	28769296	28780233	+	protein_coding	Mapk13
ENSMUSG00000034872	67.7072	-1.10686	0.157187	-7.0417	1.9e-12	3.14e-11	10	81335264	81343266	-	protein_coding	Gipc3	ENSMUSG00000034872	109.347	85.4974	83.5621	115.858	87.0593	122.611	106.104	75.0681	53.5447	100.245	45.8801	46.8533	31.9417	56.2677	36.5373	42.6681	31.5472	64.6401	29.3914	29.5225	10	81335264	81343266	-	protein_coding	Gipc3
ENSMUSG00000090122	285.038	-1.10647	0.149935	-7.37966	1.59e-13	3.09e-12	X	142304751	142306294	-	protein_coding	Kcne1l	ENSMUSG00000090122	235.778	602.553	414.468	366.883	428.238	333.31	330.794	365.549	503.136	369.442	135.455	221.489	283.717	175.479	158.024	208.278	184.644	124.663	133.392	125.47	X	142304751	142306294	-	protein_coding	Kcne1l
ENSMUSG00000058620	43.4785	-1.10566	0.277543	-3.98376	6.78e-05	0.000301544	2	127363207	127367221	+	protein_coding	Adra2b	ENSMUSG00000058620	18.7939	69.2122	50.1373	87.3531	91.7652	59.5197	47.8507	59.5649	110.782	42.8012	8.73906	34.0752	58.2466	13.3517	7.30746	52.0695	25.9801	4.61715	13.5653	13.8387	2	127363207	127367221	+	protein_coding	Adra2b
ENSMUSG00000115381	15.4385	-1.10554	0.254763	-4.33949	1.43e-05	7.29e-05	15	26743231	26746137	-	TEC	Gm49266	ENSMUSG00000115381	11.1055	14.2496	15.5983	29.4242	16.4707	36.9022	36.4081	23.6628	21.2333	16.8952	2.18477	20.2321	6.57622	6.67583	5.48059	6.50869	9.2786	15.0057	5.65219	9.22577	15	26743231	26746137	-	TEC	Gm49266
ENSMUSG00000000159	9.03843	-1.10492	0.266654	-4.14365	3.42e-05	0.000162155	16	96361667	96422121	+	protein_coding	Igsf5	ENSMUSG00000000159	14.5226	15.2674	11.1416	14.7121	10.5883	9.52315	10.4023	9.79149	17.5405	16.8952	8.73906	12.7782	5.63676	2.86107	1.82686	2.16956	6.49502	5.77144	2.26088	1.84515	16	96361667	96422121	+	protein_coding	Igsf5
ENSMUSG00000021685	36.0436	-1.10468	0.325436	-3.39448	0.000687598	0.00244197	13	94875601	94885130	+	protein_coding	Otp	ENSMUSG00000021685	1.70854	26.4635	37.8815	16.5511	45.8826	17.8559	68.6554	204.805	149.556	13.5162	10.9238	18.1024	27.2444	3.81476	31.0567	10.1246	9.2786	2.30858	11.3044	13.8387	13	94875601	94885130	+	protein_coding	Otp
ENSMUSG00000000263	25.9435	-1.10453	0.253498	-4.35714	1.32e-05	6.77e-05	11	55514237	55608198	-	protein_coding	Glra1	ENSMUSG00000000263	27.3366	29.517	34.539	21.1486	64.7062	28.5695	44.73	40.7979	57.2375	24.7796	19.6629	12.7782	43.2152	6.67583	12.788	12.2942	12.99	6.92573	13.5653	4.61288	11	55514237	55608198	-	protein_coding	Glra1
ENSMUSG00000047507	1383.28	-1.10434	0.290092	-3.80687	0.000140737	0.000584292	17	25242658	25256364	-	protein_coding	Baiap3	ENSMUSG00000047507	545.024	1677.38	1710.24	1708.44	1551.77	978.504	2195.93	4118.95	4999.05	1014.84	285.112	384.41	1704.18	490.197	1352.79	948.099	680.121	393.612	550.523	376.411	17	25242658	25256364	-	protein_coding	Baiap3
ENSMUSG00000103204	10.0363	-1.10418	0.27475	-4.01884	5.85e-05	0.000263388	3	154656700	154680269	+	lncRNA	Gm38139	ENSMUSG00000103204	12.814	11.1961	10.0275	16.5511	15.2942	26.1887	18.7242	8.97553	20.3101	6.75808	5.46191	12.7782	6.57622	0	2.7403	6.50869	4.6393	4.61715	2.26088	8.30319	3	154656700	154680269	+	lncRNA	Gm38139
ENSMUSG00000071763	5.78481	-1.10383	0.302541	-3.64852	0.000263758	0.00102719	X	53686636	53690919	+	unprocessed_pseudogene	4933416I08Rik	ENSMUSG00000071763	7.68843	4.0713	10.0275	13.7926	12.9412	1.19039	13.523	9.79149	8.30866	5.63174	2.18477	1.06485	1.87892	1.90738	5.48059	1.44637	3.71144	8.08001	1.13044	1.84515	X	53686636	53690919	+	unprocessed_pseudogene	4933416I08Rik
ENSMUSG00000116557	158.591	-1.10333	0.169163	-6.5223	6.92e-11	8.97e-10	16	18207821	18213863	-	lncRNA	4933432I09Rik	ENSMUSG00000116557	396.381	232.064	217.262	175.626	144.707	211.89	158.115	261.922	219.718	184.721	116.885	129.912	52.6098	94.4153	100.478	73.0419	58.4552	137.36	88.1742	118.09	16	18207821	18213863	-	lncRNA	4933432I09Rik
ENSMUSG00000023064	133.407	-1.10284	0.202223	-5.45359	4.94e-08	3.99e-07	14	34370273	34374789	-	protein_coding	Sncg	ENSMUSG00000023064	58.0903	144.531	184.951	173.787	238.825	140.466	260.058	248.051	324.961	99.1186	53.5268	85.1879	83.612	59.1288	135.188	73.7651	66.8059	96.9602	70.0872	71.0384	14	34370273	34374789	-	protein_coding	Sncg
ENSMUSG00000041700	4.63079	-1.10116	0.315181	-3.49372	0.000476337	0.0017493	X	145290358	145349089	-	protein_coding	Lhfpl1	ENSMUSG00000041700	5.12562	4.0713	8.91329	7.35605	9.41182	4.76158	4.16093	6.52766	14.771	6.75808	2.18477	6.38909	3.75784	0	1.82686	4.33912	0	0	2.26088	0	X	145290358	145349089	-	protein_coding	Lhfpl1
ENSMUSG00000054083	125.071	-1.10095	0.136559	-8.06207	7.5e-16	2.11e-14	7	28881421	28893563	+	protein_coding	Capn12	ENSMUSG00000054083	177.688	160.817	153.754	161.833	182.354	172.607	228.851	141.161	177.252	166.699	110.331	120.328	62.9439	89.6469	52.0656	57.1318	52.888	77.3373	89.3046	66.4255	7	28881421	28893563	+	protein_coding	Capn12
ENSMUSG00000018168	17.9048	-1.10044	0.240481	-4.57599	4.74e-06	2.66e-05	11	98464901	98546031	-	protein_coding	Ikzf3	ENSMUSG00000018168	11.9598	20.3565	18.9407	34.9412	48.2356	30.9502	18.7242	18.767	30.4651	22.5269	2.18477	12.7782	16.9103	11.4443	5.48059	9.40144	10.2065	6.92573	15.8261	11.0709	11	98464901	98546031	-	protein_coding	Ikzf3
ENSMUSG00000108446	77.6207	-1.1003	0.178398	-6.16766	6.93e-10	7.6e-09	7	42561413	42578235	-	lncRNA	Gm44997	ENSMUSG00000108446	87.9898	119.086	80.2196	112.18	114.118	147.609	117.546	68.5404	117.244	117.14	57.8963	56.437	71.399	43.8698	21.0089	31.8202	72.3731	32.3201	28.261	55.3546	7	42561413	42578235	-	lncRNA	Gm44997
ENSMUSG00000097187	105.076	-1.09992	0.12301	-8.9417	3.83e-19	1.66e-17	2	84742168	84743655	-	protein_coding	Gm19426	ENSMUSG00000097187	113.618	141.478	161.553	145.282	145.883	185.701	154.995	153.4	134.785	108.129	63.3582	88.3824	74.2174	76.2952	67.594	53.5159	46.393	65.7944	76.8698	44.2837	2	84742168	84743655	-	protein_coding	Gm19426
ENSMUSG00000004952	484.436	-1.09878	0.0993117	-11.064	1.88e-28	2.62e-26	5	136083915	136111860	+	protein_coding	Rasa4	ENSMUSG00000004952	509.999	606.624	756.516	699.744	694.121	801.135	739.606	639.71	697.928	500.098	322.253	320.519	403.029	324.255	284.077	325.434	299.699	296.652	238.522	228.799	5	136083915	136111860	+	protein_coding	Rasa4
ENSMUSG00000086815	41.9102	-1.0973	0.186776	-5.87495	4.23e-09	4.09e-08	5	30103583	30106086	-	protein_coding	3110082J24Rik	ENSMUSG00000086815	54.6733	65.1409	74.6488	68.0434	63.5298	59.5197	65.5347	61.1968	40.6201	31.5377	24.0324	43.6588	31.0022	35.2865	14.6149	21.6956	26.9079	28.8572	10.1739	17.529	5	30103583	30106086	-	protein_coding	3110082J24Rik
ENSMUSG00000035946	37.6374	-1.09665	0.268185	-4.08917	4.33e-05	0.000200667	5	75075600	75077893	+	protein_coding	Gsx2	ENSMUSG00000035946	13.6683	74.3013	75.763	63.4459	60.0003	45.235	79.0577	29.3745	79.3939	25.906	17.4781	12.7782	33.8206	3.81476	25.5761	28.9275	29.6915	38.0915	9.04351	7.38061	5	75075600	75077893	+	protein_coding	Gsx2
ENSMUSG00000095616	7.21314	-1.09591	0.317436	-3.45237	0.000555682	0.00201179	18	10150976	10151140	-	snRNA	Gm26244	ENSMUSG00000095616	0.85427	10.1783	10.0275	11.0341	12.9412	26.1887	22.8851	8.97553	8.30866	1.12635	2.18477	2.1297	0.939461	3.81476	0	7.95506	3.71144	5.77144	3.39132	1.84515	18	10150976	10151140	-	snRNA	Gm26244
ENSMUSG00000020679	9.50089	-1.09574	0.313889	-3.49086	0.000481471	0.00176681	11	83850062	83905819	+	protein_coding	Hnf1b	ENSMUSG00000020679	15.3769	2.03565	15.5983	7.35605	8.23534	17.8559	13.523	29.3745	25.8492	11.2635	2.18477	0	14.0919	11.4443	1.82686	4.33912	3.71144	0	2.26088	3.69031	11	83850062	83905819	+	protein_coding	Hnf1b
ENSMUSG00000059361	3562.67	-1.09494	0.142061	-7.70756	1.28e-14	3.04e-13	2	152368754	152376638	-	protein_coding	Nrsn2	ENSMUSG00000059361	2752.46	4235.17	3839.4	5308.31	6114.15	4461.6	5360.32	6703.9	6723.56	3644.86	1975.03	2130.76	3103.98	1913.1	3060.91	2285.27	1740.67	2046.55	2346.79	1506.57	2	152368754	152376638	-	protein_coding	Nrsn2
ENSMUSG00000020599	4224.11	-1.09357	0.258852	-4.22471	2.39e-05	0.000117254	11	109225354	109298129	-	protein_coding	Rgs9	ENSMUSG00000020599	1996.43	6493.73	4234.93	6600.21	8660.05	5017.51	6682.46	5444.88	10371.1	5290.45	1530.43	3134.91	5180.19	1522.09	945.402	3034.49	3977.74	1913.81	1145.13	1306.37	11	109225354	109298129	-	protein_coding	Rgs9
ENSMUSG00000110480	10.6787	-1.09239	0.294938	-3.70379	0.000212406	0.000846139	8	48270247	48270985	-	processed_pseudogene	Gm32842	ENSMUSG00000110480	5.97989	16.2852	2.22832	11.0341	30.5884	29.7598	28.0863	8.97553	16.6173	10.1371	1.09238	4.25939	2.81838	7.62952	3.65373	8.67825	9.2786	2.30858	6.78263	7.38061	8	48270247	48270985	-	processed_pseudogene	Gm32842
ENSMUSG00000022144	50.9195	-1.09208	0.227661	-4.79697	1.61e-06	9.89e-06	15	7810845	7837575	+	protein_coding	Gdnf	ENSMUSG00000022144	27.3366	91.6043	70.1922	48.7338	115.295	47.6158	74.8968	88.9393	111.705	45.0539	18.5705	38.3345	60.1255	22.8886	16.4418	47.0072	29.6915	19.6229	20.3479	23.987	15	7810845	7837575	+	protein_coding	Gdnf
ENSMUSG00000100176	5.25009	-1.09178	0.319167	-3.42073	0.000624525	0.00223751	9	100530615	100531071	-	lncRNA	Gm28586	ENSMUSG00000100176	5.97989	10.1783	11.1416	12.8731	9.41182	8.33276	14.5633	2.44787	1.84637	5.63174	2.18477	2.1297	0	0	2.7403	1.44637	8.35074	0	1.13044	4.61288	9	100530615	100531071	-	lncRNA	Gm28586
ENSMUSG00000028523	8.55129	-1.0917	0.281608	-3.87667	0.000105897	0.000451536	4	102978605	103005594	+	protein_coding	Tctex1d1	ENSMUSG00000028523	6.83416	17.303	6.68497	11.9536	20.0001	4.76158	11.4426	12.2394	22.1564	11.2635	5.46191	4.25939	4.6973	1.90738	8.22089	2.16956	1.85572	6.92573	9.04351	1.84515	4	102978605	103005594	+	protein_coding	Tctex1d1
ENSMUSG00000085742	12.3477	-1.09152	0.249418	-4.37628	1.21e-05	6.23e-05	2	33446801	33449207	+	lncRNA	Gm13536	ENSMUSG00000085742	16.2311	23.41	14.4841	16.5511	15.2942	29.7598	16.6437	19.583	12.0014	12.3898	14.201	6.38909	3.75784	7.62952	0.913432	8.67825	5.56716	12.6972	3.39132	7.38061	2	33446801	33449207	+	lncRNA	Gm13536
ENSMUSG00000004105	207.67	-1.09031	0.162847	-6.69531	2.15e-11	3.05e-10	2	33216068	33247717	+	protein_coding	Angptl2	ENSMUSG00000004105	299.849	280.92	401.098	210.567	315.296	194.034	225.731	161.56	393.277	390.842	161.673	157.598	138.101	79.1563	152.543	104.862	88.1467	161.6	142.435	94.1028	2	33216068	33247717	+	protein_coding	Angptl2
ENSMUSG00000076617	1126.65	-1.09015	0.264735	-4.11789	3.82e-05	0.000179546	12	113418557	113422730	-	IG_C_gene	Ighm	ENSMUSG00000076617	2280.05	1711.98	990.49	1643.16	1597.66	1721.31	1432.4	1516.86	1356.16	2015.04	1678.99	1209.67	572.132	482.567	247.54	143.191	417.537	309.349	668.089	538.785	12	113418557	113422730	-	IG_C_gene	Ighm
ENSMUSG00000070436	1675.27	-1.08953	0.140991	-7.72767	1.1e-14	2.63e-13	7	99345375	99353239	-	protein_coding	Serpinh1	ENSMUSG00000070436	2554.27	3055.51	2782.06	2424.74	2225.89	1952.25	2226.1	1678.42	2176.87	1997.01	1355.65	1892.24	1195.93	800.146	805.647	734.035	771.979	937.282	1073.92	865.377	7	99345375	99353239	-	protein_coding	Serpinh1
ENSMUSG00000051314	11.2113	-1.08936	0.248405	-4.38542	1.16e-05	6e-05	7	30818347	30823775	-	protein_coding	Ffar2	ENSMUSG00000051314	20.5025	8.14261	11.1416	22.0681	14.1177	16.6655	12.4828	12.2394	18.4637	24.7796	4.36953	8.51879	8.45515	5.72214	7.30746	7.23187	1.85572	2.30858	6.78263	11.0709	7	30818347	30823775	-	protein_coding	Ffar2
ENSMUSG00000045232	5.76281	-1.08908	0.317987	-3.42492	0.000614992	0.00220804	8	84042928	84045000	-	protein_coding	Rln3	ENSMUSG00000045232	4.27135	2.03565	3.34249	5.51704	11.7648	11.9039	14.5633	2.44787	18.4637	15.7689	4.36953	1.06485	1.87892	6.67583	1.82686	2.89275	1.85572	0	0	4.61288	8	84042928	84045000	-	protein_coding	Rln3
ENSMUSG00000035085	79.8852	-1.08724	0.140586	-7.7336	1.05e-14	2.52e-13	11	83437676	83441233	+	protein_coding	1700020L24Rik	ENSMUSG00000035085	121.306	102.8	120.329	99.3066	105.883	120.23	141.472	116.682	103.397	66.4545	65.543	40.4642	71.399	52.453	46.585	28.2043	50.1044	54.2515	47.4784	43.3611	11	83437676	83441233	+	protein_coding	1700020L24Rik
ENSMUSG00000078815	93.1426	-1.08622	0.137151	-7.9199	2.38e-15	6.22e-14	7	3424194	3435667	+	protein_coding	Cacng6	ENSMUSG00000078815	74.3215	119.086	163.782	152.638	149.413	116.659	141.472	123.21	103.397	139.667	60.081	58.5667	81.7331	55.314	51.1522	65.8101	61.2387	47.3258	36.174	61.8126	7	3424194	3435667	+	protein_coding	Cacng6
ENSMUSG00000028766	372.085	-1.08456	0.131307	-8.25972	1.46e-16	4.57e-15	4	137741732	137796384	-	protein_coding	Alpl	ENSMUSG00000028766	606.531	546.573	590.506	444.121	530.591	411.876	459.783	439.801	538.217	540.647	340.823	283.25	292.172	223.164	216.483	165.61	201.346	287.418	119.826	202.967	4	137741732	137796384	-	protein_coding	Alpl
ENSMUSG00000083962	12.274	-1.08392	0.28902	-3.75034	0.000176598	0.000717812	6	145315612	145316608	-	processed_pseudogene	Gm15707	ENSMUSG00000083962	11.9598	13.2317	32.3107	18.3901	15.2942	32.1406	15.6035	23.6628	12.0014	6.75808	2.18477	9.58364	3.75784	3.81476	19.1821	9.40144	0.92786	3.46286	9.04351	2.76773	6	145315612	145316608	-	processed_pseudogene	Gm15707
ENSMUSG00000006517	1923.56	-1.08372	0.0837547	-12.9392	2.7e-38	1e-35	8	122433600	122443422	-	protein_coding	Mvd	ENSMUSG00000006517	2827.63	2396.98	2511.32	2557.15	3012.96	2704.58	2780.54	2460.93	2462.13	2529.78	1486.73	1646.26	1235.39	1239.8	1013.91	1100.69	1187.66	1233.93	896.438	1186.43	8	122433600	122443422	-	protein_coding	Mvd
ENSMUSG00000085562	36.3616	-1.08263	0.235457	-4.598	4.27e-06	2.42e-05	4	125887850	125922417	-	lncRNA	2610028E06Rik	ENSMUSG00000085562	41.8592	83.4617	49.0231	53.3313	45.8826	20.2367	33.2875	54.6691	98.7808	34.9168	13.1086	18.1024	35.6995	9.5369	16.4418	31.8202	34.3308	12.6972	27.1305	12.9161	4	125887850	125922417	-	lncRNA	2610028E06Rik
ENSMUSG00000103959	38.6459	-1.08242	0.263847	-4.10244	4.09e-05	0.000190407	5	57984211	57985452	+	TEC	Gm37720	ENSMUSG00000103959	7.68843	34.6061	21.1691	94.7091	48.2356	96.4219	68.6554	47.3255	62.7766	74.3389	39.3258	37.2697	17.8498	17.1664	14.6149	10.8478	15.7736	17.3143	33.9132	12.9161	5	57984211	57985452	+	TEC	Gm37720
ENSMUSG00000006179	49.3062	-1.08199	0.222032	-4.87313	1.1e-06	6.96e-06	13	22002172	22009742	-	protein_coding	Prss16	ENSMUSG00000006179	91.4069	76.3369	77.9913	70.802	88.2358	61.9005	73.8565	62.8287	46.1592	42.8012	50.2496	59.6315	18.7892	30.5181	10.0478	15.1869	20.4129	20.7772	49.7393	18.4515	13	22002172	22009742	-	protein_coding	Prss16
ENSMUSG00000047104	3.94753	-1.08177	0.312744	-3.45897	0.000542237	0.00196713	6	135309126	135310405	-	protein_coding	Pbp2	ENSMUSG00000047104	3.41708	16.2852	20.0549	16.5511	0	2.38079	0	3.26383	11.0782	0	2.18477	0	1.87892	0	0	0	1.85572	0	0	0	6	135309126	135310405	-	protein_coding	Pbp2
ENSMUSG00000090291	1689.83	-1.08113	0.256021	-4.22282	2.41e-05	0.000118191	19	10455370	10457473	-	protein_coding	Lrrc10b	ENSMUSG00000090291	776.531	2638.2	1387.13	2355.77	3596.49	2367.69	2582.9	2446.24	3515.49	2535.41	703.494	1490.79	2017.02	538.835	419.265	804.184	1736.03	711.041	760.785	413.314	19	10455370	10457473	-	protein_coding	Lrrc10b
ENSMUSG00000070687	181.275	-1.07901	0.250907	-4.30043	1.7e-05	8.58e-05	4	136423523	136444398	+	protein_coding	Htr1d	ENSMUSG00000070687	76.8843	248.35	228.403	251.945	335.296	227.365	279.823	276.609	404.355	259.06	49.1572	95.8364	226.41	92.508	70.3343	171.395	159.592	68.103	54.261	49.8191	4	136423523	136444398	+	protein_coding	Htr1d
ENSMUSG00000025512	3335.61	-1.07894	0.0456481	-23.6361	1.64e-123	9.23e-120	7	141493135	141539857	-	protein_coding	Chid1	ENSMUSG00000025512	4388.38	4442.81	4652.74	4706.03	4425.91	4548.5	4742.42	4350.68	4503.3	4567.34	2365.01	2248.96	2373.08	2154.39	1902.68	2095.8	2084.9	2231.24	2081.14	1847	7	141493135	141539857	-	protein_coding	Chid1
ENSMUSG00000113128	8.01941	-1.07814	0.264031	-4.0834	4.44e-05	0.00020515	13	3899208	3900248	-	TEC	Gm47813	ENSMUSG00000113128	11.9598	6.10696	13.3699	8.27555	15.2942	11.9039	15.6035	14.6872	12.9246	5.63174	2.18477	7.45394	3.75784	3.81476	6.39402	6.50869	4.6393	5.77144	2.26088	1.84515	13	3899208	3900248	-	TEC	Gm47813
ENSMUSG00000001249	98.0304	-1.07734	0.115253	-9.3476	8.97e-21	5.03e-19	7	31098724	31115290	-	protein_coding	Hpn	ENSMUSG00000001249	158.04	115.014	162.668	114.019	118.824	110.707	140.431	156.664	124.63	141.92	66.6353	59.6315	52.6098	56.2677	70.3343	82.4434	70.5173	55.4058	42.9567	60.8901	7	31098724	31115290	-	protein_coding	Hpn
ENSMUSG00000028979	174.857	-1.07675	0.304009	-3.54185	0.00039733	0.00148731	4	148602553	148615499	+	protein_coding	Masp2	ENSMUSG00000028979	46.1306	67.1765	342.048	262.979	192.942	382.116	441.059	372.892	457.9	56.3174	71.0049	54.3073	43.2152	123.026	39.2776	109.201	41.7537	118.892	230.609	44.2837	4	148602553	148615499	+	protein_coding	Masp2
ENSMUSG00000096107	28.9549	-1.07631	0.282279	-3.81294	0.000137326	0.000571397	13	3358272	3363862	+	transcribed_unprocessed_pseudogene	Gm16505	ENSMUSG00000096107	24.7738	52.927	50.1373	28.5047	34.1178	35.7118	85.2991	14.6872	71.0852	24.7796	37.141	14.9079	6.57622	10.4906	7.30746	14.4637	7.42288	45.0172	4.52175	9.22577	13	3358272	3363862	+	transcribed_unprocessed_pseudogene	Gm16505
ENSMUSG00000112169	46.7947	-1.07624	0.247134	-4.35487	1.33e-05	6.83e-05	12	46683144	46686474	-	TEC	Gm48536	ENSMUSG00000112169	39.2964	31.5526	70.1922	69.8825	78.824	73.8044	56.1726	86.4915	124.63	34.9168	22.94	44.7236	48.852	19.0738	2.7403	36.8826	19.4851	32.3201	23.7392	19.3741	12	46683144	46686474	-	TEC	Gm48536
ENSMUSG00000058523	3.90047	-1.0757	0.324506	-3.31489	0.000916781	0.00315595	4	61831318	61835233	-	protein_coding	Mup5	ENSMUSG00000058523	10.2512	4.0713	2.22832	9.19506	4.70591	13.0943	8.32186	4.89574	5.53911	0	2.18477	4.25939	1.87892	0	1.82686	0	3.71144	0	0	1.84515	4	61831318	61835233	-	protein_coding	Mup5
ENSMUSG00000058260	292.496	-1.07505	0.306749	-3.50466	0.000457187	0.00168576	12	103994742	104013755	-	protein_coding	Serpina9	ENSMUSG00000058260	50.4019	620.874	260.714	449.638	800.004	332.12	410.892	400.635	691.466	387.463	78.6516	322.649	218.894	84.8784	16.4418	114.987	309.905	177.76	68.9567	52.5869	12	103994742	104013755	-	protein_coding	Serpina9
ENSMUSG00000045318	2418.25	-1.07505	0.115717	-9.29034	1.54e-20	8.31e-19	5	35278318	35281763	+	protein_coding	Adra2c	ENSMUSG00000045318	2318.49	3071.8	2843.34	3290.91	3928.26	2818.85	3537.83	3728.11	4563.3	2961.17	1376.4	1719.73	1735.18	1250.29	1860.66	2101.58	1343.54	1347.05	1475.22	1093.25	5	35278318	35281763	+	protein_coding	Adra2c
ENSMUSG00000046480	6983.41	-1.0741	0.248993	-4.31377	1.6e-05	8.1e-05	9	45138394	45154152	+	protein_coding	Scn4b	ENSMUSG00000046480	5013.71	11043.4	5782.5	9161.04	16048.3	8043.49	8045.16	9218.68	16057	11010	4131.39	7107.86	7321.22	1970.32	1233.13	3187.09	6467.18	3159.29	3372.1	2295.37	9	45138394	45154152	+	protein_coding	Scn4b
ENSMUSG00000024907	37.3293	-1.07187	0.324778	-3.30033	0.000965719	0.00330856	19	3409914	3414544	-	protein_coding	Gal	ENSMUSG00000024907	3.41708	95.6756	53.4798	15.6316	54.1179	4.76158	33.2875	146.056	156.018	32.6641	10.9238	4.25939	35.6995	3.81476	20.0955	27.4811	7.42288	4.61715	21.4783	15.6838	19	3409914	3414544	-	protein_coding	Gal
ENSMUSG00000097870	20.3476	-1.07163	0.252037	-4.25188	2.12e-05	0.000104868	9	56606692	56614473	+	lncRNA	Gm26868	ENSMUSG00000097870	66.633	26.4635	11.1416	12.8731	36.4708	9.52315	43.6898	31.0064	31.3883	20.2742	13.1086	12.7782	9.39461	7.62952	8.22089	12.2942	12.99	15.0057	11.3044	14.7612	9	56606692	56614473	+	lncRNA	Gm26868
ENSMUSG00000030946	1172.99	-1.07112	0.0972301	-11.0164	3.19e-28	4.36e-26	7	132610637	132706420	+	protein_coding	Lhpp	ENSMUSG00000030946	1413.82	1617.33	1673.47	1727.75	1836.48	1580.84	1686.22	1487.49	1501.1	1454.11	961.297	994.569	780.692	773.443	532.531	600.969	627.233	838.013	770.959	601.52	7	132610637	132706420	+	protein_coding	Lhpp
ENSMUSG00000094627	27.7437	-1.06979	0.228504	-4.68171	2.84e-06	1.67e-05	9	22321104	22321377	-	processed_pseudogene	Gm10182	ENSMUSG00000094627	7.68843	48.8556	53.4798	34.0217	31.7649	53.5677	48.8909	51.4053	37.8506	22.5269	17.4781	13.843	17.8498	11.4443	19.1821	11.571	18.5572	21.9315	23.7392	9.22577	9	22321104	22321377	-	processed_pseudogene	Gm10182
ENSMUSG00000032128	4015.29	-1.0696	0.187911	-5.69207	1.26e-08	1.12e-07	9	37415668	37433246	-	protein_coding	Robo3	ENSMUSG00000032128	9143.25	4163.93	3803.75	5439.8	3542.37	6428.13	6947.72	5442.43	4771.02	5993.29	3647.47	3567.24	1893.95	2962.16	1499.86	1638.02	1517.98	2784.14	3014.88	2104.4	9	37415668	37433246	-	protein_coding	Robo3
ENSMUSG00000038537	28.7743	-1.06907	0.253262	-4.22119	2.43e-05	0.000118981	2	172248491	172251114	+	protein_coding	Mc3r	ENSMUSG00000038537	18.7939	53.9448	31.1965	48.7338	44.7061	21.4271	39.5288	66.9085	52.6215	31.5377	34.9562	21.297	20.6681	17.1664	3.65373	14.4637	21.3408	18.4686	11.3044	2.76773	2	172248491	172251114	+	protein_coding	Mc3r
ENSMUSG00000054435	29.6693	-1.06896	0.22945	-4.65879	3.18e-06	1.86e-05	6	48684548	48692060	+	protein_coding	Gimap4	ENSMUSG00000054435	64.0702	36.6417	53.4798	36.7802	34.1178	54.7581	52.0116	35.9021	35.081	13.5162	17.4781	34.0752	18.7892	13.3517	9.13432	7.23187	16.7015	13.8515	31.6523	14.7612	6	48684548	48692060	+	protein_coding	Gimap4
ENSMUSG00000028871	611.512	-1.06835	0.130117	-8.21071	2.2e-16	6.67e-15	4	124986429	125009099	+	protein_coding	Rspo1	ENSMUSG00000028871	877.335	554.715	708.607	793.534	667.062	1108.26	919.566	1248.41	704.39	781.685	550.561	441.912	372.026	330.931	412.871	280.597	356.298	460.561	302.957	357.96	4	124986429	125009099	+	protein_coding	Rspo1
ENSMUSG00000035711	762.676	-1.06774	0.144902	-7.36869	1.72e-13	3.34e-12	13	55523230	55529296	-	protein_coding	Dok3	ENSMUSG00000035711	1193.41	1431.06	1232.26	845.945	941.182	945.173	874.836	1244.33	938.879	810.97	534.175	866.787	418.06	378.615	327.009	401.369	377.639	446.709	661.306	383.792	13	55523230	55529296	-	protein_coding	Dok3
ENSMUSG00000075020	279.723	-1.06676	0.12707	-8.39508	4.66e-17	1.55e-15	2	94160635	94264918	-	lncRNA	Mir670hg	ENSMUSG00000075020	298.14	595.428	397.756	346.654	437.649	326.168	423.375	350.862	337.886	308.619	185.705	203.386	206.681	199.321	184.513	138.129	137.323	240.092	125.479	151.303	2	94160635	94264918	-	lncRNA	Mir670hg
ENSMUSG00000049620	7.41423	-1.06613	0.298136	-3.57597	0.000348929	0.0013236	17	23833346	23836056	-	protein_coding	Prss33	ENSMUSG00000049620	10.2512	19.3387	6.68497	11.0341	9.41182	14.2847	11.4426	3.26383	19.3869	5.63174	2.18477	1.06485	3.75784	1.90738	3.65373	6.50869	12.0622	2.30858	2.26088	1.84515	17	23833346	23836056	-	protein_coding	Prss33
ENSMUSG00000022269	389.207	-1.06585	0.0984884	-10.8221	2.71e-27	3.31e-25	15	26309047	26409576	+	protein_coding	2011-03-01	ENSMUSG00000022269	486.934	564.893	538.14	503.889	561.179	601.149	598.134	598.913	490.211	353.673	346.285	264.082	234.865	281.339	233.839	236.482	220.831	223.932	194.435	250.941	15	26309047	26409576	+	protein_coding	2011-03-01
ENSMUSG00000034689	6.38665	-1.06469	0.309869	-3.43594	0.000590507	0.00212699	14	95881253	95882780	+	protein_coding	Spertl	ENSMUSG00000034689	8.5427	4.0713	0	11.0341	7.05886	14.2847	6.2414	18.767	11.0782	15.7689	4.36953	0	0.939461	3.81476	7.30746	4.33912	1.85572	2.30858	2.26088	3.69031	14	95881253	95882780	+	protein_coding	Spertl
ENSMUSG00000020814	835.685	-1.06442	0.107304	-9.91967	3.42e-23	2.63e-21	11	116803061	116828046	-	protein_coding	Mxra7	ENSMUSG00000020814	1086.63	719.603	1127.53	1296.5	1178.83	1246.34	1084.96	1445.88	1211.22	982.175	675.093	514.322	641.652	503.548	466.764	384.013	480.631	599.075	600.263	468.669	11	116803061	116828046	-	protein_coding	Mxra7
ENSMUSG00000103329	9.78641	-1.06408	0.268305	-3.96592	7.31e-05	0.000322923	1	6861236	6864151	-	TEC	Gm42492	ENSMUSG00000103329	15.3769	29.517	16.7124	11.0341	15.2942	14.2847	6.2414	11.4234	11.0782	10.1371	2.18477	6.38909	5.63676	0	7.30746	5.06231	7.42288	4.61715	6.78263	9.22577	1	6861236	6864151	-	TEC	Gm42492
ENSMUSG00000049598	46.0601	-1.06368	0.194494	-5.46897	4.53e-08	3.67e-07	1	172555937	172563717	+	protein_coding	Vsig8	ENSMUSG00000049598	48.6934	39.6952	72.4205	96.5481	58.8238	66.6621	89.46	44.0617	81.2403	42.8012	28.402	29.8158	17.8498	50.5456	26.4895	40.4985	26.9079	16.16	19.2175	24.9096	1	172555937	172563717	+	protein_coding	Vsig8
ENSMUSG00000107042	57.5369	-1.06269	0.159413	-6.66626	2.62e-11	3.66e-10	6	127776083	127778321	-	TEC	4921513H07Rik	ENSMUSG00000107042	75.1757	50.8913	66.8497	104.824	78.824	94.0411	117.546	91.3872	48.0056	63.0754	46.9725	37.2697	35.6995	32.4255	43.8447	37.6057	28.7637	39.2458	26.0001	32.2902	6	127776083	127778321	-	TEC	4921513H07Rik
ENSMUSG00000109857	75.4706	-1.06161	0.163668	-6.48636	8.79e-11	1.12e-09	16	13462545	13467237	+	lncRNA	Gm32817	ENSMUSG00000109857	89.6983	121.121	104.731	79.997	90.5887	111.897	106.104	103.627	107.089	123.898	63.3582	57.5018	86.4304	44.8234	31.0567	44.1144	51.9602	32.3201	20.3479	38.7482	16	13462545	13467237	+	lncRNA	Gm32817
ENSMUSG00000044681	9.74963	-1.06125	0.321759	-3.29826	0.000972863	0.00333134	5	28200818	28245806	-	protein_coding	Cnpy1	ENSMUSG00000044681	1.70854	18.3209	6.68497	3.67802	16.4707	9.52315	4.16093	45.6936	35.081	11.2635	0	0	5.63676	1.90738	1.82686	8.67825	7.42288	4.61715	6.78263	5.53546	5	28200818	28245806	-	protein_coding	Cnpy1
ENSMUSG00000066158	2.83593	-1.06106	0.326487	-3.24994	0.00115428	0.00388169	8	45060701	45065418	-	lncRNA	AY512931	ENSMUSG00000066158	1.70854	2.03565	4.45665	6.43654	7.05886	0	6.2414	3.26383	9.23185	6.75808	0	2.1297	0	0	0	1.44637	0	0	2.26088	3.69031	8	45060701	45065418	-	lncRNA	AY512931
ENSMUSG00000040258	362.585	-1.05824	0.16138	-6.55742	5.47e-11	7.26e-10	10	127525472	127534559	-	protein_coding	Nxph4	ENSMUSG00000040258	322.06	548.608	481.318	322.747	642.356	411.876	447.3	667.453	649.922	486.582	172.596	298.158	419.939	202.182	215.57	177.904	270.007	156.983	196.696	161.451	10	127525472	127534559	-	protein_coding	Nxph4
ENSMUSG00000013936	26.0199	-1.05721	0.216485	-4.88352	1.04e-06	6.63e-06	5	122100950	122113472	+	protein_coding	Myl2	ENSMUSG00000013936	27.3366	33.5883	25.6257	39.5388	49.412	66.6621	41.6093	32.6383	28.6187	18.0216	15.2934	19.1673	18.7892	20.9812	12.788	14.4637	7.42288	27.7029	12.4348	8.30319	5	122100950	122113472	+	protein_coding	Myl2
ENSMUSG00000052848	427.931	-1.05614	0.119363	-8.84816	8.9e-19	3.7e-17	5	111581421	111604932	+	lncRNA	C130026L21Rik	ENSMUSG00000052848	626.18	588.303	560.423	575.611	494.12	579.722	638.703	548.323	576.067	636.386	408.551	360.984	245.199	277.524	204.609	219.126	180.933	302.423	338.001	197.431	5	111581421	111604932	+	lncRNA	C130026L21Rik
ENSMUSG00000044364	326.923	-1.05577	0.102564	-10.2938	7.52e-25	6.93e-23	2	151702007	151712157	+	protein_coding	Tmem74b	ENSMUSG00000044364	360.502	387.792	398.87	491.016	447.061	526.154	513.875	398.187	457.9	459.55	264.357	250.239	258.352	195.506	200.042	188.029	187.428	242.4	157.131	154.07	2	151702007	151712157	+	protein_coding	Tmem74b
ENSMUSG00000043366	73.8125	-1.05503	0.278665	-3.78601	0.000153087	0.000630447	7	102738510	102759471	-	protein_coding	Olfr78	ENSMUSG00000043366	164.02	55.9804	140.384	213.325	75.2945	35.7118	165.397	35.0862	93.2417	88.9814	50.2496	38.3345	15.9708	35.2865	21.0089	26.0347	17.6293	63.4858	73.4785	67.3481	7	102738510	102759471	-	protein_coding	Olfr78
ENSMUSG00000090222	2.569	-1.0525	0.32571	-3.23141	0.00123182	0.00410724	1	173776528	173798270	-	unprocessed_pseudogene	Ifi203-ps	ENSMUSG00000090222	9.39697	7.12478	4.45665	0.919506	0	2.38079	2.08047	4.07979	6.46229	6.75808	0	1.06485	0	1.90738	0	2.89275	1.85572	0	0	0	1	173776528	173798270	-	unprocessed_pseudogene	Ifi203-ps
ENSMUSG00000017400	6222.07	-1.05245	0.10074	-10.4471	1.51e-25	1.51e-23	11	98036622	98053462	-	protein_coding	Stac2	ENSMUSG00000017400	11519	7978.74	7361.27	7810.28	8755.34	8887.48	8210.56	7347.69	7135.3	9447.8	5319.9	4748.16	3895.94	3651.68	2857.22	3971.02	3381.12	3926.89	4762.54	3473.5	11	98036622	98053462	-	protein_coding	Stac2
ENSMUSG00000105876	12.5568	-1.05223	0.226469	-4.64626	3.38e-06	1.96e-05	3	149005495	149007443	+	lncRNA	Gm43572	ENSMUSG00000105876	19.6482	24.4278	8.91329	22.0681	15.2942	15.4751	15.6035	17.9511	17.5405	19.1479	6.5543	6.38909	7.51568	10.4906	10.0478	10.8478	5.56716	9.2343	5.65219	2.76773	3	149005495	149007443	+	lncRNA	Gm43572
ENSMUSG00000019489	3.00705	-1.05211	0.326474	-3.22266	0.00127005	0.0042193	17	57145996	57149777	-	protein_coding	Cd70	ENSMUSG00000019489	0.85427	4.0713	8.91329	9.19506	5.88238	0	5.20116	3.26383	9.23185	2.25269	2.18477	2.1297	1.87892	1.90738	0.913432	0	0	0	2.26088	0	17	57145996	57149777	-	protein_coding	Cd70
ENSMUSG00000093874	1.68713	-1.05061	0.321853	-3.26425	0.00109753	0.0037108	13	62136929	62137062	+	snoRNA	Gm24539	ENSMUSG00000093874	1.70854	1.01783	3.34249	2.75852	0	8.33276	4.16093	3.26383	2.76955	2.25269	1.09238	2.1297	0	0	0.913432	0	0	0	0	0	13	62136929	62137062	+	snoRNA	Gm24539
ENSMUSG00000111293	91.0615	-1.05051	0.143565	-7.31729	2.53e-13	4.78e-12	10	42861381	42864699	-	lncRNA	Gm34006	ENSMUSG00000111293	103.367	91.6043	138.156	162.753	123.53	107.135	150.834	159.112	128.323	77.718	34.9562	83.0582	58.2466	68.6657	62.1134	49.8999	51.0323	62.3315	57.6524	50.7417	10	42861381	42864699	-	lncRNA	Gm34006
ENSMUSG00000105152	111.14	-1.0503	0.146884	-7.15052	8.65e-13	1.51e-11	5	112649366	112652112	+	lncRNA	Gm42864	ENSMUSG00000105152	155.477	98.7291	196.092	164.592	101.177	146.418	169.558	174.615	138.478	171.205	79.7439	105.42	50.7309	74.3878	73.988	47.7304	51.9602	62.3315	98.3481	61.8126	5	112649366	112652112	+	lncRNA	Gm42864
ENSMUSG00000095366	3.87287	-1.0496	0.316959	-3.31148	0.000928032	0.00319175	Y	90752426	90755467	-	lncRNA	Gm21860	ENSMUSG00000095366	5.12562	5.08913	5.57081	1.83901	14.1177	3.57118	4.16093	4.07979	4.61592	11.2635	3.27715	3.19455	1.87892	0	0.913432	1.44637	0	1.15429	3.39132	2.76773	Y	90752426	90755467	-	lncRNA	Gm21860
ENSMUSG00000101464	117.04	-1.04894	0.138091	-7.59599	3.05e-14	6.72e-13	9	105545436	105545827	-	processed_pseudogene	Gm7436	ENSMUSG00000101464	148.643	146.567	162.668	145.282	204.707	135.705	181.001	137.897	150.479	182.468	109.238	100.096	80.7936	101.091	71.2477	49.1767	53.8159	71.5658	47.4784	60.8901	9	105545436	105545827	-	processed_pseudogene	Gm7436
ENSMUSG00000005716	4349.64	-1.04866	0.118896	-8.81995	1.15e-18	4.68e-17	15	78191113	78206400	-	protein_coding	Pvalb	ENSMUSG00000005716	5687.73	4063.16	5386.97	5256.82	6337.68	7135.22	7405.42	7179.61	5032.28	5646.38	3479.24	3123.2	2397.5	2938.32	2070.75	2394.47	1974.49	3645.24	3468.18	2370.1	15	78191113	78206400	-	protein_coding	Pvalb
ENSMUSG00000045319	274.221	-1.04839	0.116111	-9.02925	1.73e-19	8e-18	2	6097606	6130211	-	protein_coding	Proser2	ENSMUSG00000045319	436.532	434.612	427.838	301.598	268.237	390.449	379.685	367.181	347.118	369.442	219.569	217.229	187.892	185.016	189.994	108.478	128.045	199.692	176.348	149.457	2	6097606	6130211	-	protein_coding	Proser2
ENSMUSG00000028584	185.513	-1.04788	0.116237	-9.01502	1.97e-19	9e-18	4	143349756	143371032	+	protein_coding	Lrrc38	ENSMUSG00000028584	260.552	244.278	230.631	221.601	252.943	279.743	246.535	261.922	288.957	230.901	156.211	151.208	117.433	110.628	75.8148	133.066	73.3009	143.132	134.522	96.8706	4	143349756	143371032	+	protein_coding	Lrrc38
ENSMUSG00000024987	10.7813	-1.0475	0.270433	-3.87341	0.000107324	0.00045704	19	37697797	37701536	+	protein_coding	Cyp26a1	ENSMUSG00000024987	18.7939	22.3922	14.4841	6.43654	22.3531	9.52315	18.7242	17.1351	20.3101	4.50539	4.36953	8.51879	9.39461	5.72214	3.65373	4.33912	9.2786	9.2343	0	6.45804	19	37697797	37701536	+	protein_coding	Cyp26a1
ENSMUSG00000049588	23.7918	-1.04712	0.207606	-5.0438	4.56e-07	3.11e-06	11	55049730	55078131	-	protein_coding	Ccdc69	ENSMUSG00000049588	27.3366	23.41	24.5116	17.4706	30.5884	64.2813	44.73	39.1659	27.6955	31.5377	19.6629	14.9079	9.39461	14.3054	10.9612	14.4637	20.4129	11.5429	14.6957	14.7612	11	55049730	55078131	-	protein_coding	Ccdc69
ENSMUSG00000107168	93.6534	-1.04655	0.195006	-5.36676	8.02e-08	6.27e-07	5	36618700	36621255	+	TEC	Gm42507	ENSMUSG00000107168	45.2763	124.175	88.0188	152.638	127.06	208.319	223.65	125.657	108.013	91.2341	75.3744	59.6315	66.7017	73.4341	39.2776	31.8202	61.2387	53.0972	62.1741	56.2772	5	36618700	36621255	+	TEC	Gm42507
ENSMUSG00000022505	2017.58	-1.04582	0.119873	-8.72443	2.68e-18	1.05e-16	16	10281748	10313968	-	protein_coding	Emp2	ENSMUSG00000022505	2304.82	3155.26	2997.09	2969.08	2676.48	2842.66	2860.64	2278.15	2550.76	2778.7	1599.25	2175.49	1447.71	1219.77	936.268	1045.01	1041.99	1416.31	1032.09	1024.06	16	10281748	10313968	-	protein_coding	Emp2
ENSMUSG00000092695	4.96757	-1.0454	0.308033	-3.39379	0.000689333	0.00244736	3	27584899	27584995	-	miRNA	Mir3092	ENSMUSG00000092695	4.27135	10.1783	3.34249	6.43654	11.7648	4.76158	14.5633	4.89574	7.38548	6.75808	7.64668	2.1297	0	0.95369	3.65373	1.44637	0.92786	1.15429	3.39132	3.69031	3	27584899	27584995	-	miRNA	Mir3092
ENSMUSG00000030069	48.1456	-1.04469	0.224674	-4.64978	3.32e-06	1.93e-05	6	99711298	99726392	-	protein_coding	Prok2	ENSMUSG00000030069	25.6281	116.032	141.499	46.8948	76.471	46.4254	40.5691	70.9883	69.2389	39.4222	17.4781	22.3618	47.9125	27.657	31.9701	28.9275	32.4751	21.9315	35.0436	23.987	6	99711298	99726392	-	protein_coding	Prok2
ENSMUSG00000101997	27.5692	-1.04469	0.193915	-5.38734	7.15e-08	5.65e-07	1	90453393	90454501	-	lncRNA	Gm28722	ENSMUSG00000101997	53.819	36.6417	49.0231	32.1827	38.8237	27.3791	20.8047	47.3255	41.5433	33.7904	20.7553	17.0376	20.6681	19.0738	8.22089	24.5884	20.4129	13.8515	7.91307	17.529	1	90453393	90454501	-	lncRNA	Gm28722
ENSMUSG00000047557	999.581	-1.04408	0.0835427	-12.4976	7.7e-36	2.36e-33	3	67457997	67463926	-	protein_coding	Lxn	ENSMUSG00000047557	1265.17	1330.3	1354.82	1361.79	1440.01	1377.29	1303.41	1454.04	1302.61	1327.96	746.097	773.08	873.698	596.056	689.641	634.959	582.696	510.195	553.915	513.875	3	67457997	67463926	-	protein_coding	Lxn
ENSMUSG00000097084	7.22286	-1.04384	0.277066	-3.76749	0.0001649	0.000674649	8	121127939	121130644	+	protein_coding	Foxl1	ENSMUSG00000097084	10.2512	6.10696	11.1416	10.1146	11.7648	14.2847	6.2414	8.97553	16.6173	9.01078	0	6.38909	7.51568	1.90738	1.82686	4.33912	3.71144	4.61715	2.26088	7.38061	8	121127939	121130644	+	protein_coding	Foxl1
ENSMUSG00000007594	5376.6	-1.04197	0.116525	-8.94197	3.82e-19	1.66e-17	8	70083456	70090862	+	protein_coding	Hapln4	ENSMUSG00000007594	9643	6268.79	7302.22	6884.34	6689.45	7881.6	7344.04	7597.38	6202.88	7141.04	4820.68	4716.21	2364.62	2620.74	2795.1	3030.88	2774.3	3678.71	4212.01	3563.91	8	70083456	70090862	+	protein_coding	Hapln4
ENSMUSG00000110660	5.23583	-1.04124	0.323279	-3.22088	0.001278	0.00424267	9	3494378	3497463	-	processed_pseudogene	Gm5362	ENSMUSG00000110660	0.85427	16.2852	2.22832	14.7121	14.1177	9.52315	5.20116	10.6074	1.84637	6.75808	6.5543	0	3.75784	1.90738	1.82686	2.16956	0	0	4.52175	1.84515	9	3494378	3497463	-	processed_pseudogene	Gm5362
ENSMUSG00000100475	29.5061	-1.04118	0.19379	-5.37272	7.76e-08	6.08e-07	13	96133368	96134335	+	lncRNA	Gm29543	ENSMUSG00000100475	22.211	48.8556	46.7948	40.4583	52.9415	41.6638	39.5288	43.2457	36.9274	36.0431	25.1248	23.4267	25.3654	17.1664	14.6149	24.5884	24.1244	6.92573	9.04351	11.0709	13	96133368	96134335	+	lncRNA	Gm29543
ENSMUSG00000021700	25810.8	-1.04099	0.0626019	-16.6288	4.31e-62	8.08e-59	13	110054186	110280996	-	protein_coding	Rab3c	ENSMUSG00000021700	32170.1	35150.6	35284.4	36983.4	34963.7	36652.2	34199.7	34925.4	33466.4	34355.8	17705.3	20851.9	17450.5	16231.8	17014.5	17046.3	13908.6	15926.9	18327.8	13600.6	13	110054186	110280996	-	protein_coding	Rab3c
ENSMUSG00000073888	6374.89	-1.04054	0.112022	-9.28866	1.56e-20	8.41e-19	4	41769466	41774247	-	protein_coding	Ccl27a	ENSMUSG00000073888	9105.66	7838.28	7699.97	8448.42	9174.17	10479	9904.06	8909.44	7112.22	7747.02	5937.1	5461.61	3489.16	4774.17	3112.06	3315.09	3016.47	4373.6	4160.01	3440.29	4	41769466	41774247	-	protein_coding	Ccl27a
ENSMUSG00000102740	47.4372	-1.04052	0.199465	-5.21655	1.82e-07	1.34e-06	1	141356788	141357277	+	TEC	Gm37599	ENSMUSG00000102740	64.9245	46.82	95.8179	57.9289	67.0592	52.3773	85.2991	65.2766	71.0852	47.3066	28.402	68.1503	25.3654	33.3792	20.0955	14.4637	18.5572	27.7029	38.4349	20.2967	1	141356788	141357277	+	TEC	Gm37599
ENSMUSG00000085078	26.3824	-1.0402	0.207483	-5.01341	5.35e-07	3.59e-06	11	80507409	80509106	-	lncRNA	C030013C21Rik	ENSMUSG00000085078	20.5025	28.4991	36.7673	39.5388	22.3531	70.2332	48.8909	30.1904	40.6201	28.1587	16.3857	24.4915	12.213	21.9349	11.8746	12.2942	15.7736	10.3886	18.087	18.4515	11	80507409	80509106	-	lncRNA	C030013C21Rik
ENSMUSG00000118296	3.25434	-1.04003	0.326411	-3.18626	0.00144127	0.00471297	18	38582849	38583455	+	processed_pseudogene	Gm19100	ENSMUSG00000118296	2.56281	0	5.57081	1.83901	7.05886	11.9039	8.32186	5.7117	7.38548	2.25269	3.27715	0	0	1.90738	1.82686	0	0	1.15429	3.39132	0.922577	18	38582849	38583455	+	processed_pseudogene	Gm19100
ENSMUSG00000060969	55.024	-1.0392	0.176887	-5.87491	4.23e-09	4.09e-08	13	71957920	71963723	-	protein_coding	Irx1	ENSMUSG00000060969	41.0049	79.3904	61.2789	71.7215	101.177	54.7581	58.253	83.2276	136.631	67.5808	30.5867	42.5939	43.2152	29.5644	38.3641	28.9275	35.2587	20.7772	42.9567	33.2128	13	71957920	71963723	-	protein_coding	Irx1
ENSMUSG00000113125	4.53461	-1.03833	0.311485	-3.33347	0.000857704	0.00296893	12	105027641	105027963	-	processed_pseudogene	Gm47650	ENSMUSG00000113125	3.41708	7.12478	14.4841	6.43654	2.35295	4.76158	4.16093	8.15957	12.9246	4.50539	2.18477	3.19455	1.87892	1.90738	0	1.44637	1.85572	2.30858	1.13044	6.45804	12	105027641	105027963	-	processed_pseudogene	Gm47650
ENSMUSG00000024379	10.1256	-1.03832	0.24537	-4.23163	2.32e-05	0.000114017	18	32815382	32819797	+	protein_coding	Tslp	ENSMUSG00000024379	10.2512	13.2317	13.3699	18.3901	16.4707	11.9039	14.5633	9.79149	14.771	20.2742	6.5543	6.38909	7.51568	3.81476	1.82686	8.67825	5.56716	2.30858	11.3044	5.53546	18	32815382	32819797	+	protein_coding	Tslp
ENSMUSG00000053137	3894.05	-1.0368	0.126816	-8.17562	2.94e-16	8.77e-15	15	89142485	89149628	-	protein_coding	Mapk11	ENSMUSG00000053137	6375.41	5322.21	4964.7	5045.33	4271.79	5574.62	5953.25	5963.01	4276.19	5110.24	3350.34	3353.21	2126	2903.03	1771.14	1635.13	1618.19	3230.85	2629.4	2407	15	89142485	89149628	-	protein_coding	Mapk11
ENSMUSG00000041064	40.8453	-1.03645	0.201471	-5.1444	2.68e-07	1.9e-06	9	65587159	65595967	+	protein_coding	Pif1	ENSMUSG00000041064	29.0452	72.2656	62.3931	75.3995	47.0591	38.0926	83.2186	56.301	50.7752	49.5593	25.1248	54.3073	22.5471	23.8423	17.3552	20.9724	35.2587	15.0057	18.087	20.2967	9	65587159	65595967	+	protein_coding	Pif1
ENSMUSG00000021278	565.995	-1.03599	0.1531	-6.76676	1.32e-11	1.93e-10	12	111271094	111276426	+	protein_coding	Amn	ENSMUSG00000021278	660.35	525.198	591.62	805.487	817.651	930.888	936.21	894.289	724.7	834.623	209.737	178.895	403.029	366.217	464.023	538.775	256.089	430.549	439.741	311.831	12	111271094	111276426	+	protein_coding	Amn
ENSMUSG00000024378	1322.1	-1.03563	0.0985504	-10.5087	7.88e-26	8.18e-24	18	33199354	33213862	-	protein_coding	Stard4	ENSMUSG00000024378	2062.21	1724.2	1592.14	1628.45	2062.36	1543.94	1718.46	1640.07	1723.59	2173.85	1128.43	1192.63	901.882	676.166	706.996	773.087	726.514	831.087	828.611	807.255	18	33199354	33213862	-	protein_coding	Stard4
ENSMUSG00000092470	36.6672	-1.03551	0.162756	-6.36235	1.99e-10	2.38e-09	16	17835276	17891671	-	protein_coding	Gm20518	ENSMUSG00000092470	39.2964	61.0696	56.8222	47.8143	60.0003	47.6158	54.0921	44.8776	51.6984	36.0431	28.402	30.8806	17.8498	20.0275	18.2686	20.9724	14.8458	28.8572	37.3045	16.6064	16	17835276	17891671	-	protein_coding	Gm20518
ENSMUSG00000051669	184.802	-1.03509	0.237972	-4.34963	1.36e-05	6.99e-05	16	5211822	5222299	-	protein_coding	AU021092	ENSMUSG00000051669	293.869	258.528	307.509	243.669	202.354	278.552	251.736	202.357	296.342	254.554	203.183	221.489	148.435	118.258	52.0656	32.5434	42.6816	96.9602	115.305	75.6513	16	5211822	5222299	-	protein_coding	AU021092
ENSMUSG00000084124	3.00985	-1.03446	0.320173	-3.23095	0.00123377	0.00411244	2	38490103	38490238	+	processed_pseudogene	Gm13588	ENSMUSG00000084124	2.56281	6.10696	6.68497	3.67802	3.52943	5.95197	7.28163	4.89574	3.69274	2.25269	3.27715	3.19455	1.87892	1.90738	0	1.44637	1.85572	0	0	0	2	38490103	38490238	+	processed_pseudogene	Gm13588
ENSMUSG00000073412	87.644	-1.03442	0.175012	-5.91057	3.41e-09	3.36e-08	17	35185094	35188439	-	protein_coding	Lst1	ENSMUSG00000073412	93.9697	94.6578	89.1329	163.672	92.9417	157.132	138.351	159.928	119.091	90.1078	103.776	80.9285	49.7914	41.0087	31.9701	43.3912	53.8159	45.0172	59.9132	44.2837	17	35185094	35188439	-	protein_coding	Lst1
ENSMUSG00000083833	178.701	-1.0324	0.297971	-3.46479	0.000530654	0.00192925	5	115801676	115802159	-	processed_pseudogene	Gm13841	ENSMUSG00000083833	42.7135	202.547	199.435	583.886	515.297	330.93	276.702	65.2766	190.176	218.511	63.3582	51.1127	162.527	62.9436	31.0567	33.2666	171.654	126.972	136.783	108.864	5	115801676	115802159	-	processed_pseudogene	Gm13841
ENSMUSG00000092748	5.72104	-1.03107	0.315519	-3.26784	0.00108371	0.00366886	12	113425149	113425227	-	miRNA	Gm22175	ENSMUSG00000092748	20.5025	10.1783	2.22832	8.27555	2.35295	5.95197	6.2414	6.52766	9.23185	14.6425	5.46191	6.38909	1.87892	3.81476	0.913432	0	0	3.46286	4.52175	1.84515	12	113425149	113425227	-	miRNA	Gm22175
ENSMUSG00000059412	230.627	-1.03043	0.141284	-7.29327	3.03e-13	5.63e-12	9	45399668	45410278	+	protein_coding	Fxyd2	ENSMUSG00000059412	194.773	328.758	259.6	418.375	367.061	292.837	372.403	244.787	324.038	330.02	188.982	212.97	184.134	109.674	106.872	101.969	161.448	120.046	162.783	131.006	9	45399668	45410278	+	protein_coding	Fxyd2
ENSMUSG00000112113	2.87185	-1.0301	0.32602	-3.15961	0.00157982	0.00511989	10	14771939	14774519	+	lncRNA	Gm47698	ENSMUSG00000112113	1.70854	5.08913	5.57081	1.83901	3.52943	8.33276	8.32186	4.89574	2.76955	4.50539	0	0	3.75784	3.81476	0	1.44637	1.85572	0	0	0	10	14771939	14774519	+	lncRNA	Gm47698
ENSMUSG00000019865	213.521	-1.03	0.233477	-4.41156	1.03e-05	5.37e-05	10	14705590	14770850	+	protein_coding	Nmbr	ENSMUSG00000019865	252.01	465.146	460.149	275.852	307.06	210.7	192.443	346.782	260.338	214.006	93.9449	62.8261	244.26	136.378	200.955	159.101	187.428	63.4858	75.7394	61.8126	10	14705590	14770850	+	protein_coding	Nmbr
ENSMUSG00000103932	78.7919	-1.02977	0.18177	-5.66523	1.47e-08	1.29e-07	16	77539881	77542205	+	TEC	Gm36963	ENSMUSG00000103932	36.7336	74.3013	94.7037	120.455	124.707	163.084	135.23	108.522	108.936	113.761	37.141	73.4746	42.2757	47.6845	53.8925	34.713	44.5373	68.103	37.3045	56.2772	16	77539881	77542205	+	TEC	Gm36963
ENSMUSG00000019539	227.434	-1.02954	0.173345	-5.93928	2.86e-09	2.85e-08	7	45082912	45092221	-	protein_coding	Rcn3	ENSMUSG00000019539	150.351	326.722	483.546	368.722	340.002	242.84	318.311	292.113	371.12	216.259	194.444	227.878	153.132	124.933	137.928	103.416	100.209	146.595	176.348	73.8061	7	45082912	45092221	-	protein_coding	Rcn3
ENSMUSG00000025081	46.8166	-1.0279	0.206258	-4.98354	6.24e-07	4.14e-06	19	56826208	56870012	+	protein_coding	Tdrd1	ENSMUSG00000025081	29.0452	61.0696	67.9639	63.4459	58.8238	32.1406	101.943	94.651	82.1635	56.3174	17.4781	21.297	22.5471	19.0738	39.2776	44.1144	38.9701	18.4686	36.174	31.3676	19	56826208	56870012	+	protein_coding	Tdrd1
ENSMUSG00000108325	238.269	-1.02776	0.0998077	-10.2974	7.24e-25	6.7e-23	7	55275935	55278158	+	TEC	Gm44898	ENSMUSG00000108325	332.311	261.581	385.5	285.047	301.178	357.118	355.76	319.039	278.802	339.031	166.042	176.765	139.98	175.479	93.1701	162.717	167.943	178.915	136.783	152.225	7	55275935	55278158	+	TEC	Gm44898
ENSMUSG00000029790	300.973	-1.02746	0.113103	-9.0843	1.04e-19	4.99e-18	6	30653456	30693749	-	protein_coding	Cep41	ENSMUSG00000029790	465.577	516.038	435.637	325.505	342.355	361.88	368.242	409.61	436.666	403.232	216.292	286.444	212.318	184.062	141.582	141.745	210.624	214.698	191.044	155.915	6	30653456	30693749	-	protein_coding	Cep41
ENSMUSG00000113984	100.034	-1.02685	0.196825	-5.21704	1.82e-07	1.33e-06	13	9328629	9330247	+	TEC	Gm48890	ENSMUSG00000113984	46.9848	126.21	104.731	126.892	112.942	208.319	250.696	147.688	151.402	101.371	69.9125	91.577	58.2466	85.8321	40.191	63.6405	45.4651	60.023	38.4349	70.1158	13	9328629	9330247	+	TEC	Gm48890
ENSMUSG00000044139	16.8067	-1.02678	0.226397	-4.53528	5.75e-06	3.17e-05	7	127885840	127890970	-	protein_coding	Prss53	ENSMUSG00000044139	29.0452	42.7487	17.8266	10.1146	15.2942	32.1406	26.0058	19.583	18.4637	22.5269	13.1086	7.45394	9.39461	9.5369	9.13432	8.67825	15.7736	11.5429	11.3044	6.45804	7	127885840	127890970	-	protein_coding	Prss53
ENSMUSG00000021456	2.46582	-1.0258	0.326551	-3.14132	0.00168186	0.00541172	13	62836876	62858422	-	protein_coding	Fbp2	ENSMUSG00000021456	0	6.10696	5.57081	6.43654	7.05886	3.57118	5.20116	2.44787	1.84637	2.25269	2.18477	2.1297	1.87892	1.90738	0	0.723187	0	0	0	0	13	62836876	62858422	-	protein_coding	Fbp2
ENSMUSG00000004366	16045.5	-1.02568	0.0948211	-10.817	2.86e-27	3.49e-25	16	23889572	23890958	-	protein_coding	Sst	ENSMUSG00000004366	23532.6	21022.2	21323.9	21630.5	23137.8	24487.6	24864.7	19723.3	19268.7	17318.7	11615.3	12065.8	8587.61	11254.5	13172.6	9794.13	7751.34	12163.9	10411.3	7783.78	16	23889572	23890958	-	protein_coding	Sst
ENSMUSG00000026839	1184.93	-1.02554	0.0742599	-13.8101	2.22e-43	1.15e-40	2	58567297	58792971	+	protein_coding	Upp2	ENSMUSG00000026839	1511.2	1353.71	1862.88	1580.63	1531.77	1674.88	1560.35	1697.19	1501.1	1665.87	808.363	893.408	792.905	659	787.378	767.302	701.462	654.481	998.177	696.545	2	58567297	58792971	+	protein_coding	Upp2
ENSMUSG00000075277	6.28223	-1.02428	0.300426	-3.40943	0.000650984	0.00232417	2	74748421	74762896	-	lncRNA	Haglr	ENSMUSG00000075277	8.5427	2.03565	12.2558	8.27555	10.5883	9.52315	9.3621	12.2394	10.155	9.01078	6.5543	6.38909	7.51568	3.81476	1.82686	0	1.85572	2.30858	3.39132	0	2	74748421	74762896	-	lncRNA	Haglr
ENSMUSG00000047261	22122.7	-1.02414	0.0805775	-12.71	5.21e-37	1.81e-34	16	42248441	42340651	-	protein_coding	Gap43	ENSMUSG00000047261	23269.5	29167.8	32117.9	30192.9	33221.4	29118.2	31728.1	31229.1	31335.7	26317.1	16451.3	17697.8	16620	15678.7	13042	14782.7	11835.8	14196.6	12646.2	11806.2	16	42248441	42340651	-	protein_coding	Gap43
ENSMUSG00000002104	56.6921	-1.02402	0.191635	-5.34359	9.11e-08	7.08e-07	2	91035619	91045729	+	protein_coding	Rapsn	ENSMUSG00000002104	44.422	75.3191	81.3338	123.214	112.942	89.2795	58.253	70.9883	68.3157	55.191	39.3258	24.4915	76.0963	29.5644	32.8835	32.5434	33.403	35.7829	23.7392	26.7547	2	91035619	91045729	+	protein_coding	Rapsn
ENSMUSG00000024011	112.608	-1.02257	0.250841	-4.07656	4.57e-05	0.000210618	17	29317679	29330593	+	protein_coding	Pi16	ENSMUSG00000024011	38.4421	215.779	206.12	159.075	192.942	86.8988	190.363	124.841	284.341	86.7287	24.0324	44.7236	111.796	66.7583	59.3731	105.585	57.5273	54.2515	78.0002	64.5804	17	29317679	29330593	+	protein_coding	Pi16
ENSMUSG00000082149	17.3565	-1.02211	0.281961	-3.62501	0.000288952	0.00111693	4	137222640	137223322	-	processed_pseudogene	Gm13002	ENSMUSG00000082149	19.6482	9.16043	23.3974	8.27555	15.2942	51.1869	27.0461	39.1659	42.4665	13.5162	5.46191	7.45394	3.75784	11.4443	11.8746	5.06231	8.35074	28.8572	10.1739	5.53546	4	137222640	137223322	-	processed_pseudogene	Gm13002
ENSMUSG00000090907	11.4048	-1.02165	0.27022	-3.78081	0.00015632	0.000642431	13	92415016	92427224	-	lncRNA	C030017D09Rik	ENSMUSG00000090907	12.814	14.2496	14.4841	20.2291	18.8236	19.0463	14.5633	17.1351	16.6173	13.5162	12.0162	13.843	1.87892	1.90738	3.65373	5.06231	2.78358	4.61715	18.087	2.76773	13	92415016	92427224	-	lncRNA	C030017D09Rik
ENSMUSG00000031220	6.26339	-1.0216	0.323679	-3.15622	0.00159829	0.00517231	X	100402220	100442717	-	protein_coding	Awat2	ENSMUSG00000031220	6.83416	6.10696	4.45665	2.75852	14.1177	9.52315	17.684	8.15957	24.0028	4.50539	0	10.6485	0	3.81476	1.82686	4.33912	5.56716	0	0	0.922577	X	100402220	100442717	-	protein_coding	Awat2
ENSMUSG00000006342	805.208	-1.02118	0.108784	-9.38715	6.16e-21	3.54e-19	10	75636705	75644008	-	protein_coding	Susd2	ENSMUSG00000006342	867.938	983.22	1246.75	789.856	1041.18	1035.64	1342.94	1191.3	1402.32	960.774	643.413	520.711	664.199	522.622	361.719	573.488	443.517	527.509	515.48	469.592	10	75636705	75644008	-	protein_coding	Susd2
ENSMUSG00000087292	10.7737	-1.021	0.261338	-3.90682	9.35e-05	0.00040349	5	115359077	115422863	+	lncRNA	Gm13832	ENSMUSG00000087292	8.5427	10.1783	11.1416	10.1146	20.0001	23.8079	22.8851	13.0553	13.8478	19.1479	6.5543	1.06485	4.6973	2.86107	8.22089	5.06231	4.6393	13.8515	5.65219	10.1483	5	115359077	115422863	+	lncRNA	Gm13832
ENSMUSG00000117395	3.61463	-1.02073	0.323596	-3.15435	0.00160857	0.00520108	18	4010255	4011157	+	processed_pseudogene	Gm7378	ENSMUSG00000117395	3.41708	8.14261	4.45665	3.67802	9.41182	4.76158	6.2414	12.2394	1.84637	2.25269	2.18477	2.1297	0	1.90738	1.82686	0	0	0	2.26088	5.53546	18	4010255	4011157	+	processed_pseudogene	Gm7378
ENSMUSG00000073433	4954.2	-1.02051	0.0829818	-12.298	9.29e-35	2.57e-32	17	26199182	26207786	-	protein_coding	Arhgdig	ENSMUSG00000073433	5982.45	6133.42	6375.23	6816.3	7743.57	7312.59	7475.11	6599.46	5773.6	6412.29	4080.05	3667.34	3030.7	3762.31	3068.22	2876.12	2431.92	3642.93	2862.27	3038.05	17	26199182	26207786	-	protein_coding	Arhgdig
ENSMUSG00000117674	22.8997	-1.01858	0.209635	-4.85884	1.18e-06	7.43e-06	18	40242773	40258495	-	lncRNA	Gm31087	ENSMUSG00000117674	32.4622	22.3922	33.4249	39.5388	17.6472	28.5695	35.3679	24.4787	43.3897	37.1695	17.4781	23.4267	14.0919	7.62952	6.39402	10.8478	13.9179	12.6972	26.0001	11.0709	18	40242773	40258495	-	lncRNA	Gm31087
ENSMUSG00000024208	3624.97	-1.01833	0.0885441	-11.5008	1.31e-30	2.27e-28	17	27122662	27133916	-	protein_coding	Uqcc2	ENSMUSG00000024208	3704.97	4016.34	4870	5083.03	5617.68	5466.29	5807.62	5648.87	4418.36	4119.05	2690.54	2745.18	2742.29	2570.2	2101.81	2034.33	2195.32	2286.64	2044.96	2335.96	17	27122662	27133916	-	protein_coding	Uqcc2
ENSMUSG00000037169	717.78	-1.01732	0.147109	-6.91542	4.66e-12	7.34e-11	12	12936092	12941914	-	protein_coding	Mycn	ENSMUSG00000037169	1231.86	939.453	896.9	692.388	1004.71	898.747	1029.83	1099.91	876.102	1063.27	820.379	639.974	551.463	373.847	304.173	418.002	385.062	467.487	258.87	403.166	12	12936092	12941914	-	protein_coding	Mycn
ENSMUSG00000109372	2187.89	-1.01578	0.112503	-9.02893	1.73e-19	8.02e-18	8	35765789	35818047	+	protein_coding	Gm19410	ENSMUSG00000109372	3588.79	2694.19	2358.68	3061.95	2865.9	3358.1	3142.54	2789.76	2482.44	3149.27	1919.32	1878.39	941.34	1633.67	1219.43	1651.76	1112.5	1498.27	1183.57	1227.95	8	35765789	35818047	+	protein_coding	Gm19410
ENSMUSG00000086783	4.73197	-1.01546	0.321009	-3.16336	0.00155961	0.00506071	2	168289018	168295121	-	lncRNA	Gm14262	ENSMUSG00000086783	9.39697	9.16043	15.5983	9.19506	0	3.57118	4.16093	0.815957	12.9246	7.88443	3.27715	2.1297	2.81838	3.81476	0.913432	1.44637	1.85572	1.15429	4.52175	0	2	168289018	168295121	-	lncRNA	Gm14262
ENSMUSG00000023484	113.926	-1.01442	0.201852	-5.02557	5.02e-07	3.39e-06	15	99055173	99058978	+	protein_coding	Prph	ENSMUSG00000023484	190.502	163.87	100.275	130.57	229.413	215.461	140.431	107.706	94.1649	193.732	72.0973	100.096	50.7309	64.8509	155.283	52.0695	30.6194	71.5658	68.9567	46.1288	15	99055173	99058978	+	protein_coding	Prph
ENSMUSG00000018459	1363.35	-1.01385	0.120721	-8.39823	4.53e-17	1.51e-15	2	165405027	165473230	-	protein_coding	Slc13a3	ENSMUSG00000018459	1471.91	2148.63	2179.3	1599.94	1889.42	1468.95	1830.81	1276.16	2512.91	2011.66	1091.29	1002.02	1211.9	712.407	675.94	728.25	817.445	1020.39	880.611	737.139	2	165405027	165473230	-	protein_coding	Slc13a3
ENSMUSG00000106670	17.7554	-1.01296	0.259049	-3.91031	9.22e-05	0.000398285	8	14350177	14350285	+	miRNA	Gm44347	ENSMUSG00000106670	13.6683	25.4456	21.1691	27.5852	9.41182	32.1406	59.2933	26.9266	19.3869	14.6425	15.2934	7.45394	4.6973	14.3054	4.56716	7.23187	7.42288	19.6229	14.6957	10.1483	8	14350177	14350285	+	miRNA	Gm44347
ENSMUSG00000056586	28.0249	-1.01227	0.186436	-5.4296	5.65e-08	4.53e-07	5	150507054	150518164	-	protein_coding	Zar1l	ENSMUSG00000056586	21.3567	26.4635	30.0824	36.7802	40.0002	60.7101	55.1323	45.6936	34.1578	33.7904	14.201	18.1024	17.8498	19.0738	25.5761	16.6333	19.4851	16.16	13.5653	15.6838	5	150507054	150518164	-	protein_coding	Zar1l
ENSMUSG00000054871	5643.9	-1.01222	0.128742	-7.86237	3.77e-15	9.7e-14	9	123259052	123260764	-	protein_coding	Tmem158	ENSMUSG00000054871	5143.56	7344.63	6557.96	8513.71	9775.35	6924.52	7897.45	7461.11	10020.2	6563.23	4075.68	5002.66	5272.25	3058.48	2848.99	4174.96	3652.06	3331.27	2731.14	2528.78	9	123259052	123260764	-	protein_coding	Tmem158
ENSMUSG00000031130	6.63374	-1.01206	0.324626	-3.11763	0.00182314	0.00580807	X	57043073	57048758	+	protein_coding	Brs3	ENSMUSG00000031130	0	6.10696	8.91329	11.0341	9.41182	7.14236	4.16093	26.1106	29.5419	9.01078	0	0	9.39461	0	5.48059	0	0	0	4.52175	1.84515	X	57043073	57048758	+	protein_coding	Brs3
ENSMUSG00000114498	1.96644	-1.01134	0.323088	-3.13024	0.00174663	0.00559388	14	20057851	20058297	-	processed_pseudogene	Gm48339	ENSMUSG00000114498	4.27135	6.10696	2.22832	5.51704	0	3.57118	5.20116	3.26383	3.69274	0	2.18477	0	0	0	0	1.44637	0	0	0	1.84515	14	20057851	20058297	-	processed_pseudogene	Gm48339
ENSMUSG00000085141	9.14849	-1.01095	0.267244	-3.78286	0.000155035	0.000637537	2	36202313	36212903	+	lncRNA	Gm13429	ENSMUSG00000085141	10.2512	6.10696	14.4841	7.35605	16.4707	17.8559	10.4023	7.34361	23.0796	16.8952	5.46191	5.32424	1.87892	8.58321	6.39402	7.23187	2.78358	3.46286	7.91307	3.69031	2	36202313	36212903	+	lncRNA	Gm13429
ENSMUSG00000089877	3.05006	-1.01066	0.323592	-3.12327	0.00178853	0.0057113	1	44644278	44644698	+	processed_pseudogene	Gm16102	ENSMUSG00000089877	0	0	2.22832	7.35605	5.88238	7.14236	10.4023	3.26383	11.0782	4.50539	2.18477	3.19455	0	1.90738	0	0	1.85572	0	0	0	1	44644278	44644698	+	processed_pseudogene	Gm16102
ENSMUSG00000081273	1.41941	-1.01048	0.308727	-3.27305	0.00106392	0.00360729	9	82202647	82203398	+	processed_pseudogene	Gm15896	ENSMUSG00000081273	0	0	2.22832	8.27555	1.17648	2.38079	4.16093	3.26383	1.84637	3.37904	0	0	0	0.95369	0	0.723187	0	0	0	0	9	82202647	82203398	+	processed_pseudogene	Gm15896
ENSMUSG00000114531	2.64629	-1.01042	0.324404	-3.11469	0.00184137	0.00585565	13	60029710	60116669	+	lncRNA	A530065N20Rik	ENSMUSG00000114531	1.70854	4.0713	2.22832	3.67802	3.52943	2.38079	4.16093	9.79149	5.53911	4.50539	2.18477	0	2.81838	1.90738	0	1.44637	0	0	1.13044	1.84515	13	60029710	60116669	+	lncRNA	A530065N20Rik
ENSMUSG00000025350	179.574	-1.01025	0.100012	-10.1013	5.45e-24	4.54e-22	10	128913592	128922888	-	protein_coding	Rdh5	ENSMUSG00000025350	184.522	249.367	247.344	188.499	283.531	249.983	294.386	226.02	253.876	236.533	148.564	119.263	108.977	111.582	142.495	93.2912	115.982	108.503	105.131	123.625	10	128913592	128922888	-	protein_coding	Rdh5
ENSMUSG00000026389	686.942	-1.00971	0.130912	-7.71292	1.23e-14	2.92e-13	1	120190756	120272705	-	protein_coding	Steap3	ENSMUSG00000026389	880.752	1107.39	1021.69	760.431	956.476	758.281	831.146	829.012	1073.66	1052.01	521.067	724.097	612.528	406.272	286.818	356.531	329.39	372.835	469.132	389.327	1	120190756	120272705	-	protein_coding	Steap3
ENSMUSG00000102326	86.4716	-1.00945	0.189678	-5.32193	1.03e-07	7.91e-07	1	157347338	157350043	-	TEC	Gm37788	ENSMUSG00000102326	50.4019	145.549	64.6214	111.26	91.7652	171.417	181.001	126.473	108.013	131.783	50.2496	74.5394	54.4887	65.8046	25.5761	47.7304	39.898	71.5658	50.8697	66.4255	1	157347338	157350043	-	TEC	Gm37788
ENSMUSG00000102501	7.16964	-1.00913	0.291488	-3.46199	0.000536192	0.00194771	1	106072583	106075894	-	TEC	Gm37372	ENSMUSG00000102501	3.41708	15.2674	7.79913	11.0341	9.41182	11.9039	8.32186	9.79149	11.0782	15.7689	4.36953	6.38909	0	3.81476	8.22089	2.89275	0	2.30858	7.91307	3.69031	1	106072583	106075894	-	TEC	Gm37372
ENSMUSG00000104724	111.178	-1.00908	0.270595	-3.7291	0.000192162	0.000773716	3	138976311	138978081	-	TEC	Gm43162	ENSMUSG00000104724	36.7336	68.1943	150.412	60.6874	74.118	336.881	257.978	170.535	169.866	254.554	44.7877	50.0479	45.0941	52.453	43.8447	82.4434	54.7437	108.503	91.5655	70.1158	3	138976311	138978081	-	TEC	Gm43162
ENSMUSG00000031738	14.948	-1.00782	0.321577	-3.134	0.00172443	0.00553224	8	92674287	92680956	+	protein_coding	Irx6	ENSMUSG00000031738	1.70854	24.4278	40.1098	50.5728	37.6473	2.38079	22.8851	19.583	24.0028	6.75808	13.1086	2.1297	20.6681	9.5369	1.82686	8.67825	1.85572	9.2343	0	1.84515	8	92674287	92680956	+	protein_coding	Irx6
ENSMUSG00000111361	37.1281	-1.0077	0.240728	-4.18604	2.84e-05	0.000136894	10	34178234	34179928	-	TEC	Gm47445	ENSMUSG00000111361	15.3769	43.7665	50.1373	67.1239	41.1767	102.374	81.1382	60.3808	40.6201	15.7689	17.4781	37.2697	14.0919	23.8423	23.7492	15.1869	26.9079	23.0858	13.5653	29.5225	10	34178234	34179928	-	TEC	Gm47445
ENSMUSG00000116590	232.04	-1.00622	0.174107	-5.77932	7.5e-09	6.95e-08	17	17340819	17374206	-	lncRNA	AC154200.1	ENSMUSG00000116590	168.291	354.203	297.481	320.908	364.708	354.737	450.421	239.891	348.964	257.934	102.684	220.424	120.251	245.098	59.3731	135.959	150.313	158.137	162.783	128.238	17	17340819	17374206	-	lncRNA	AC154200.1
ENSMUSG00000066704	5.35984	-1.00593	0.30678	-3.27899	0.00104178	0.00353896	7	26757141	26772630	+	protein_coding	Cyp2b19	ENSMUSG00000066704	6.83416	7.12478	3.34249	4.59753	3.52943	7.14236	21.8449	9.79149	7.38548	7.88443	2.18477	2.1297	5.63676	6.67583	2.7403	2.16956	0	1.15429	2.26088	2.76773	7	26757141	26772630	+	protein_coding	Cyp2b19
ENSMUSG00000080892	2.1271	-1.00579	0.315447	-3.18847	0.00143027	0.00468016	7	42951723	42952207	+	processed_pseudogene	Gm9266	ENSMUSG00000080892	1.70854	8.14261	2.22832	3.67802	4.70591	2.38079	6.2414	0	0	9.01078	2.18477	0	0	0	0	0	0	0	2.26088	0	7	42951723	42952207	+	processed_pseudogene	Gm9266
ENSMUSG00000055027	188.265	-1.00508	0.172297	-5.83342	5.43e-09	5.15e-08	6	71213939	71322233	-	protein_coding	Smyd1	ENSMUSG00000055027	177.688	256.492	198.321	298.839	330.59	236.888	246.535	363.101	312.96	138.541	154.026	91.577	167.224	144.961	45.6716	135.959	100.209	106.194	111.913	147.612	6	71213939	71322233	-	protein_coding	Smyd1
ENSMUSG00000081434	37.7798	-1.00452	0.239764	-4.18961	2.79e-05	0.000135026	2	152353614	152354566	+	processed_pseudogene	Gm14165	ENSMUSG00000081434	47.8391	40.713	80.2196	73.5605	61.1768	47.6158	70.7358	48.9574	36.9274	18.0216	28.402	15.9727	48.852	10.4906	20.0955	11.571	12.99	36.9372	11.3044	33.2128	2	152353614	152354566	+	processed_pseudogene	Gm14165
ENSMUSG00000085235	6.41295	-1.00416	0.321855	-3.11991	0.00180906	0.00576756	11	83817681	83849493	-	lncRNA	Gm12576	ENSMUSG00000085235	6.83416	4.0713	13.3699	11.0341	10.5883	16.6655	10.4023	7.34361	18.4637	0	4.36953	2.1297	5.63676	9.5369	0	1.44637	0	0	4.52175	1.84515	11	83817681	83849493	-	lncRNA	Gm12576
ENSMUSG00000051517	36.8167	-1.00272	0.215707	-4.64851	3.34e-06	1.94e-05	4	43496141	43499695	-	protein_coding	Arhgef39	ENSMUSG00000051517	29.8994	50.8913	40.1098	45.9753	81.1769	52.3773	61.3737	44.8776	55.3911	46.1802	12.0162	25.5564	34.76	18.1201	17.3552	23.8652	52.888	18.4686	15.8261	9.22577	4	43496141	43499695	-	protein_coding	Arhgef39
ENSMUSG00000041722	3.27465	-1.00266	0.323806	-3.09647	0.00195839	0.00617888	1	21368330	21370845	+	protein_coding	Khdc1c	ENSMUSG00000041722	9.39697	3.05348	6.68497	3.67802	3.52943	5.95197	0	10.6074	4.61592	3.37904	2.18477	4.25939	1.87892	0	1.82686	1.44637	0	1.15429	0	1.84515	1	21368330	21370845	+	protein_coding	Khdc1c
ENSMUSG00000030351	530.49	-1.00205	0.19414	-5.16147	2.45e-07	1.75e-06	6	127887588	127953977	+	protein_coding	Tspan11	ENSMUSG00000030351	906.38	359.293	680.753	640.896	580.003	874.94	734.404	1205.98	545.602	721.989	511.235	472.793	345.722	222.21	286.818	151.869	315.472	394.766	265.653	393.018	6	127887588	127953977	+	protein_coding	Tspan11
ENSMUSG00000057719	327.049	-1.00198	0.286333	-3.49933	0.000466423	0.00171625	18	42053666	42158960	+	protein_coding	Sh3rf2	ENSMUSG00000057719	124.723	505.86	332.02	446.88	704.71	399.972	586.691	424.298	738.548	439.275	115.793	351.4	491.338	57.2214	90.4298	191.645	258.873	143.132	79.1307	59.0449	18	42053666	42158960	+	protein_coding	Sh3rf2
ENSMUSG00000112679	12.3531	-1.0019	0.239578	-4.18192	2.89e-05	0.000139122	10	14296920	14324756	+	lncRNA	Gm40603	ENSMUSG00000112679	13.6683	19.3387	26.7399	18.3901	7.05886	13.0943	15.6035	18.767	15.6941	23.6533	6.5543	2.1297	5.63676	13.3517	5.48059	7.95506	5.56716	6.92573	11.3044	10.1483	10	14296920	14324756	+	lncRNA	Gm40603
ENSMUSG00000024846	297.691	-1.00146	0.138007	-7.25655	3.97e-13	7.26e-12	19	5344704	5349574	-	protein_coding	Cst6	ENSMUSG00000024846	332.311	335.883	402.212	388.032	515.297	436.875	485.789	385.132	340.655	390.842	186.797	271.536	226.41	193.599	149.803	132.343	113.199	205.463	302.957	158.683	19	5344704	5349574	-	protein_coding	Cst6
ENSMUSG00000044265	3.41654	-0.999883	0.309549	-3.23012	0.00123737	0.00412288	7	104153012	104164831	-	protein_coding	Olfm5	ENSMUSG00000044265	22.211	2.03565	4.45665	16.5511	4.70591	2.38079	0	0.815957	7.38548	2.25269	0	0	0	0	0	0	0	0	0	5.53546	7	104153012	104164831	-	protein_coding	Olfm5
ENSMUSG00000026437	2207.45	-0.998978	0.0867725	-11.5126	1.14e-30	2.02e-28	1	132112236	132139684	-	protein_coding	Cdk18	ENSMUSG00000026437	2990.8	2688.08	3116.31	2832.08	3275.31	2701	2703.57	3044.34	3124.98	3071.55	1641.85	1885.85	1812.22	1522.09	1405.77	1128.17	1554.17	1231.62	1270.61	1148.61	1	132112236	132139684	-	protein_coding	Cdk18
ENSMUSG00000113178	21.7618	-0.998058	0.295747	-3.3747	0.000738957	0.00260654	12	101221996	101222417	-	processed_pseudogene	Mylf-ps	ENSMUSG00000113178	5.12562	5.08913	26.7399	28.5047	4.70591	58.3293	43.6898	63.6447	24.926	55.191	7.64668	8.51879	7.51568	15.259	12.788	15.9101	5.56716	23.0858	14.6957	8.30319	12	101221996	101222417	-	processed_pseudogene	Mylf-ps
ENSMUSG00000030805	3566.07	-0.997681	0.0833095	-11.9756	4.77e-33	1.12e-30	7	127824293	127849019	+	protein_coding	Stx4a	ENSMUSG00000030805	4191.9	5128.83	5017.07	4912	5103.56	5173.45	5492.43	4640.35	3965.08	4078.5	2810.7	2748.37	2498.97	2664.61	2045.17	1787	2113.66	2592.53	2107.14	2250.16	7	127824293	127849019	+	protein_coding	Stx4a
ENSMUSG00000011263	86.4058	-0.995898	0.194592	-5.11789	3.09e-07	2.17e-06	7	19463330	19496762	+	protein_coding	Exoc3l2	ENSMUSG00000011263	93.1154	33.5883	93.5896	95.6286	155.295	174.988	191.403	101.995	99.704	141.92	51.342	47.9182	40.3968	55.314	84.9492	60.7477	52.888	38.0915	49.7393	65.503	7	19463330	19496762	+	protein_coding	Exoc3l2
ENSMUSG00000087322	27.408	-0.995393	0.247265	-4.02561	5.68e-05	0.000256944	11	75860968	75861494	+	lncRNA	Gm16075	ENSMUSG00000087322	9.39697	50.8913	27.854	60.6874	32.9414	38.0926	43.6898	23.6628	56.3143	39.4222	18.5705	12.7782	20.6681	15.259	10.9612	17.3565	39.898	6.92573	13.5653	9.22577	11	75860968	75861494	+	lncRNA	Gm16075
ENSMUSG00000037278	889.738	-0.994877	0.0750034	-13.2644	3.72e-40	1.61e-37	11	78541816	78550777	-	protein_coding	Tmem97	ENSMUSG00000037278	1186.58	1070.75	1290.2	1234.9	1375.3	1128.49	1329.42	1108.89	1055.2	1104.95	737.358	643.169	669.835	591.288	530.704	573.488	484.343	529.818	625.132	524.946	11	78541816	78550777	-	protein_coding	Tmem97
ENSMUSG00000038704	294.901	-0.994732	0.105978	-9.38619	6.22e-21	3.57e-19	7	44465390	44467758	+	protein_coding	Aspdh	ENSMUSG00000038704	488.642	434.612	377.701	293.322	390.59	392.83	349.518	307.616	538.217	377.326	195.537	254.499	174.74	205.043	159.851	183.69	194.851	186.995	222.696	169.754	7	44465390	44467758	+	protein_coding	Aspdh
ENSMUSG00000086954	9.34689	-0.993393	0.298443	-3.32859	0.000872877	0.00301836	2	124217678	124222331	-	lncRNA	4930583P06Rik	ENSMUSG00000086954	3.41708	13.2317	2.22832	4.59753	9.41182	30.9502	30.1668	19.583	13.8478	9.01078	4.36953	5.32424	4.6973	5.72214	7.30746	5.06231	6.49502	5.77144	1.13044	4.61288	2	124217678	124222331	-	lncRNA	4930583P06Rik
ENSMUSG00000020374	3003.87	-0.992887	0.0941427	-10.5466	5.27e-26	5.59e-24	11	49901834	49980994	+	protein_coding	Rasgef1c	ENSMUSG00000020374	4132.1	3276.38	4265.01	4086.28	3769.43	4258.04	4586.39	3727.29	4097.09	3983.89	2655.58	2500.26	2095	1900.7	1485.24	2003.95	1494.78	2246.24	1818.88	1694.77	11	49901834	49980994	+	protein_coding	Rasgef1c
ENSMUSG00000109353	183.913	-0.99286	0.205014	-4.8429	1.28e-06	8.01e-06	7	91304694	91306191	+	TEC	Gm45183	ENSMUSG00000109353	55.5275	186.262	166.01	297.92	217.648	411.876	469.145	248.867	219.718	244.417	108.146	143.755	101.462	125.887	67.594	99.7999	114.127	143.132	113.044	143.922	7	91304694	91306191	+	TEC	Gm45183
ENSMUSG00000041324	1184.96	-0.992503	0.133174	-7.45269	9.15e-14	1.86e-12	13	16011850	16031621	+	protein_coding	Inhba	ENSMUSG00000041324	2050.25	1750.66	1626.68	1425.23	1438.83	1816.54	1319.02	1746.15	1432.78	1327.96	1046.5	1065.91	1102.93	774.396	511.522	527.204	750.639	794.15	506.436	685.475	13	16011850	16031621	+	protein_coding	Inhba
ENSMUSG00000001128	898.015	-0.991814	0.105701	-9.38321	6.4e-21	3.66e-19	X	20925453	20931555	-	protein_coding	Cfp	ENSMUSG00000001128	1194.27	1443.28	1339.22	1087.78	1014.12	1355.86	1325.26	1223.94	1019.2	1021.6	746.097	732.616	498.854	599.871	426.573	669.672	501.972	631.395	699.741	428.998	X	20925453	20931555	-	protein_coding	Cfp
ENSMUSG00000052276	14.2796	-0.991736	0.286717	-3.45893	0.000542317	0.0019672	16	27307488	27351212	+	protein_coding	Ostn	ENSMUSG00000052276	14.5226	43.7665	24.5116	23.9072	16.4707	39.283	21.8449	7.34361	7.38548	5.63174	16.3857	5.32424	3.75784	7.62952	5.48059	7.95506	1.85572	13.8515	11.3044	7.38061	16	27307488	27351212	+	protein_coding	Ostn
ENSMUSG00000084628	39.2487	-0.991395	0.239046	-4.14729	3.36e-05	0.000159825	2	127473016	127473308	-	misc_RNA	Gm22613	ENSMUSG00000084628	29.0452	27.4813	57.9364	66.2044	35.2943	98.8027	108.184	53.8532	42.4665	25.906	18.5705	27.6861	22.5471	25.7496	14.6149	17.3565	41.7537	19.6229	11.3044	40.5934	2	127473016	127473308	-	misc_RNA	Gm22613
ENSMUSG00000040703	313.717	-0.991319	0.128775	-7.69809	1.38e-14	3.26e-13	7	25802474	25816913	-	protein_coding	Cyp2s1	ENSMUSG00000040703	355.376	472.271	308.623	354.929	444.708	395.211	433.777	430.009	565.912	453.918	175.874	217.229	306.264	244.145	192.734	180.797	205.057	132.743	264.523	140.232	7	25802474	25816913	-	protein_coding	Cyp2s1
ENSMUSG00000102403	25.6609	-0.990729	0.223851	-4.42585	9.61e-06	5.06e-05	1	146477646	146482355	-	TEC	Gm38187	ENSMUSG00000102403	23.9196	20.3565	32.3107	55.1704	47.0591	33.331	42.6495	35.9021	45.2361	19.1479	8.73906	13.843	18.7892	20.0275	19.1821	21.6956	22.2686	6.92573	4.52175	22.1418	1	146477646	146482355	-	TEC	Gm38187
ENSMUSG00000025993	692.604	-0.990727	0.0952006	-10.4067	2.31e-25	2.27e-23	1	45908067	45926523	-	protein_coding	Slc40a1	ENSMUSG00000025993	1049.9	863.116	1144.24	983.871	810.593	901.128	1060	771.079	820.711	857.15	523.251	498.349	528.916	564.585	369.026	449.099	385.99	485.955	331.218	453.908	1	45908067	45926523	-	protein_coding	Slc40a1
ENSMUSG00000024937	2715.82	-0.990226	0.107646	-9.19893	3.62e-20	1.83e-18	19	5707375	5726317	-	protein_coding	Ehbp1l1	ENSMUSG00000024937	3145.42	3477.91	3793.72	3155.74	3551.78	3706.89	4227.51	3660.38	3737.05	3910.68	2192.41	1917.79	2374.02	1593.62	1455.1	2152.21	1339.83	1498.27	2225.83	1200.27	19	5707375	5726317	-	protein_coding	Ehbp1l1
ENSMUSG00000070858	2102.78	-0.989228	0.0877055	-11.279	1.67e-29	2.64e-27	5	33983432	33985013	+	protein_coding	Gm1673	ENSMUSG00000070858	2116.88	2523.19	2793.2	2848.63	3095.31	3097.41	3400.52	3127.56	2664.31	2419.39	1691.01	1549.35	1578.29	1566.91	1276.98	1355.98	1110.65	1349.36	1338.44	1152.3	5	33983432	33985013	+	protein_coding	Gm1673
ENSMUSG00000007877	678.607	-0.988842	0.14963	-6.60858	3.88e-11	5.27e-10	11	98383810	98384953	+	protein_coding	Tcap	ENSMUSG00000007877	753.466	668.712	988.261	822.958	943.534	979.694	1221.23	1238.62	655.461	870.666	598.626	552.656	379.542	468.262	312.394	301.569	299.699	532.127	673.741	310.908	11	98383810	98384953	+	protein_coding	Tcap
ENSMUSG00000034911	389.467	-0.9888	0.104859	-9.42983	4.11e-21	2.43e-19	8	71384271	71395802	-	protein_coding	Ushbp1	ENSMUSG00000034911	603.114	574.054	597.191	511.245	407.061	540.439	641.824	461.832	469.901	402.106	317.883	326.909	262.11	302.32	210.089	203.216	207.841	244.709	255.479	250.018	8	71384271	71395802	-	protein_coding	Ushbp1
ENSMUSG00000066197	67.7625	-0.988717	0.251653	-3.92889	8.53e-05	0.000371807	7	119140746	119184603	-	protein_coding	Gpr139	ENSMUSG00000066197	27.3366	113.997	75.763	44.1363	160.001	109.516	62.414	99.5468	153.249	101.371	43.6953	36.2049	78.9147	20.9812	29.2298	63.6405	70.5173	13.8515	15.8261	35.0579	7	119140746	119184603	-	protein_coding	Gpr139
ENSMUSG00000026043	549.943	-0.988585	0.165992	-5.95563	2.59e-09	2.6e-08	1	45311537	45349706	+	protein_coding	Col3a1	ENSMUSG00000026043	494.622	681.943	1206.64	797.212	702.357	496.394	711.519	497.734	1032.12	815.475	500.311	570.759	454.699	297.551	295.952	245.161	236.604	391.304	302.957	267.547	1	45311537	45349706	+	protein_coding	Col3a1
ENSMUSG00000088212	2.84752	-0.988141	0.326084	-3.03033	0.00244289	0.00753495	19	34796177	34796338	+	snRNA	Gm22082	ENSMUSG00000088212	0	2.03565	8.91329	8.27555	4.70591	5.95197	7.28163	0	5.53911	4.50539	1.09238	1.06485	0.939461	1.90738	0	2.89275	0	0	0	1.84515	19	34796177	34796338	+	snRNA	Gm22082
ENSMUSG00000004891	949.318	-0.987361	0.11988	-8.23623	1.78e-16	5.48e-15	3	87971077	87980451	+	protein_coding	Nes	ENSMUSG00000004891	1914.42	1565.42	1146.47	1192.6	804.71	866.607	1325.26	1070.54	1387.55	1449.61	681.647	566.499	721.506	549.326	522.483	602.415	669.915	711.041	548.263	690.087	3	87971077	87980451	+	protein_coding	Nes
ENSMUSG00000037995	527.346	-0.986187	0.103938	-9.48824	2.35e-21	1.43e-19	1	172481787	172498878	+	protein_coding	Igsf9	ENSMUSG00000037995	817.536	670.747	701.922	618.828	598.827	647.574	794.738	695.195	869.64	633.007	460.986	392.929	428.394	355.726	310.567	296.507	279.286	425.932	269.044	279.541	1	172481787	172498878	+	protein_coding	Igsf9
ENSMUSG00000057836	33.0155	-0.985989	0.231227	-4.26416	2.01e-05	9.97e-05	X	73086292	73097095	-	protein_coding	Xlr3a	ENSMUSG00000057836	28.1909	19.3387	46.7948	23.9072	70.5886	69.0429	70.7358	58.7489	51.6984	16.8952	26.2172	17.0376	29.1233	21.9349	29.2298	15.1869	12.0622	18.4686	20.3479	14.7612	X	73086292	73097095	-	protein_coding	Xlr3a
ENSMUSG00000055409	3433.4	-0.985836	0.0984095	-10.0177	1.27e-23	1.04e-21	7	49974863	50866608	+	protein_coding	Nell1	ENSMUSG00000055409	6307.07	4292.17	4851.06	3704.69	4311.79	4155.67	4272.24	5135.63	4217.11	4628.16	3213.79	2475.77	2619.22	2038.99	1840.57	2398.09	2237.07	1896.49	2013.31	2059.19	7	49974863	50866608	+	protein_coding	Nell1
ENSMUSG00000032291	130.343	-0.985255	0.206166	-4.77894	1.76e-06	1.08e-05	9	54764747	54773110	+	protein_coding	Crabp1	ENSMUSG00000032291	90.5526	223.922	227.289	159.994	202.354	159.513	191.403	190.934	230.796	105.877	54.6191	76.6691	187.892	68.6657	67.594	91.1216	129.9	58.8687	52.0002	36.9031	9	54764747	54773110	+	protein_coding	Crabp1
ENSMUSG00000027994	99.843	-0.985216	0.159689	-6.1696	6.85e-10	7.51e-09	3	129914959	129970206	-	protein_coding	Mcub	ENSMUSG00000027994	101.658	236.136	167.124	116.777	132.942	107.135	159.156	122.394	102.474	102.498	54.6191	57.5018	90.1882	92.508	65.7671	68.7028	48.2487	72.7201	42.9567	55.3546	3	129914959	129970206	-	protein_coding	Mcub
ENSMUSG00000020361	12476.2	-0.984925	0.0857811	-11.4818	1.63e-30	2.76e-28	11	53259813	53300457	-	protein_coding	Hspa4	ENSMUSG00000020361	19831.9	18749.4	15551.5	14729.6	16406	15121.6	15062.6	17445.2	15788.3	17755.7	9776.83	11549.3	9076.13	7405.4	7389.66	6878.96	7352.36	7649.46	8443.24	7560.52	11	53259813	53300457	-	protein_coding	Hspa4
ENSMUSG00000112589	9.30387	-0.98457	0.291764	-3.37454	0.000739379	0.00260776	10	10131271	10131640	+	processed_pseudogene	Gm48280	ENSMUSG00000112589	5.97989	9.16043	16.7124	22.9876	7.05886	20.2367	17.684	13.0553	16.6173	4.50539	0	1.06485	4.6973	2.86107	4.56716	7.23187	8.35074	9.2343	11.3044	2.76773	10	10131271	10131640	+	processed_pseudogene	Gm48280
ENSMUSG00000102665	12.9921	-0.984225	0.230458	-4.27073	1.95e-05	9.7e-05	8	120109440	120110965	+	TEC	Gm38379	ENSMUSG00000102665	10.2512	21.3743	22.2832	21.1486	17.6472	16.6655	22.8851	20.3989	12.9246	13.5162	6.5543	10.6485	11.2735	7.62952	5.48059	9.40144	7.42288	6.92573	13.5653	1.84515	8	120109440	120110965	+	TEC	Gm38379
ENSMUSG00000029595	25.8429	-0.984219	0.315745	-3.11713	0.00182619	0.00581504	5	120431698	120441223	+	protein_coding	Lhx5	ENSMUSG00000029595	13.6683	30.5348	31.1965	10.1146	54.1179	26.1887	56.1726	110.154	105.243	18.0216	0	0	37.5784	0	3.65373	10.1246	5.56716	0	4.52175	0	5	120431698	120441223	+	protein_coding	Lhx5
ENSMUSG00000094497	405.776	-0.982907	0.292154	-3.36434	0.000767256	0.00269286	1	43189155	43189638	+	processed_pseudogene	Gm8210	ENSMUSG00000094497	159.748	535.376	508.058	1199.96	1087.06	623.766	606.456	190.118	444.052	486.582	108.146	107.55	379.542	109.674	67.594	92.568	298.771	453.635	321.044	335.818	1	43189155	43189638	+	processed_pseudogene	Gm8210
ENSMUSG00000043557	2552.19	-0.981616	0.126488	-7.76055	8.46e-15	2.06e-13	17	29827948	29970087	-	protein_coding	Mdga1	ENSMUSG00000043557	3562.3	4552.74	3219.93	3245.86	3043.55	2647.44	3220.56	3694.65	4146.95	2862.05	1429.93	1918.86	2777.05	1501.11	1716.34	1482.53	1387.15	1584.84	2012.18	1037.9	17	29827948	29970087	-	protein_coding	Mdga1
ENSMUSG00000109770	89.9189	-0.980877	0.150631	-6.5118	7.43e-11	9.57e-10	15	93001823	93007017	+	lncRNA	Gm30085	ENSMUSG00000109770	140.1	96.6935	133.699	147.121	92.9417	142.847	130.029	88.9393	113.552	122.772	83.0211	75.6042	60.1255	55.314	76.7283	42.6681	50.1044	33.4743	75.7394	36.9031	15	93001823	93007017	+	lncRNA	Gm30085
ENSMUSG00000085336	22.5244	-0.980647	0.240979	-4.06942	4.71e-05	0.000216283	11	117426177	117438866	+	lncRNA	Gm11732	ENSMUSG00000085336	20.5025	19.3387	25.6257	22.9876	30.5884	32.1406	41.6093	56.301	45.2361	18.0216	8.73906	8.51879	13.1524	8.58321	31.9701	13.0174	14.8458	4.61715	18.087	16.6064	11	117426177	117438866	+	lncRNA	Gm11732
ENSMUSG00000023964	31.3339	-0.980505	0.324557	-3.02106	0.00251892	0.00773693	6	3685679	3764714	-	protein_coding	Calcr	ENSMUSG00000023964	0	32.5704	42.3381	20.2291	43.5296	2.38079	27.0461	147.688	180.021	24.7796	0	9.58364	24.426	7.62952	25.5761	14.4637	9.2786	6.92573	4.52175	3.69031	6	3685679	3764714	-	protein_coding	Calcr
ENSMUSG00000040866	21.5453	-0.980023	0.195476	-5.01352	5.34e-07	3.59e-06	7	19054689	19074447	+	protein_coding	Rsph6a	ENSMUSG00000040866	28.1909	37.6596	20.0549	30.3437	32.9414	17.8559	19.7644	44.0617	30.4651	30.4114	8.73906	14.9079	16.9103	15.259	12.788	11.571	9.2786	19.6229	18.087	11.9935	7	19054689	19074447	+	protein_coding	Rsph6a
ENSMUSG00000097125	9.47003	-0.979523	0.298131	-3.28555	0.00101783	0.00346599	17	29446918	29491925	-	lncRNA	Gm26885	ENSMUSG00000097125	21.3567	12.2139	8.91329	19.3096	15.2942	21.4271	12.4828	7.34361	6.46229	12.3898	10.9238	2.1297	8.45515	3.81476	1.82686	2.16956	0.92786	0	9.04351	12.9161	17	29446918	29491925	-	lncRNA	Gm26885
ENSMUSG00000037843	16815.6	-0.977785	0.100841	-9.69629	3.13e-22	2.11e-20	2	157914652	157944719	+	protein_coding	Vstm2l	ENSMUSG00000037843	21746.3	20334.1	19370.8	25200.9	26359	20966.4	23476	24953.6	24662.9	17253.4	15504.2	11634.5	11180.5	12130.9	9635.79	11617.3	8173.52	13536.3	9699.16	8877.03	2	157914652	157944719	+	protein_coding	Vstm2l
ENSMUSG00000048240	16493.7	-0.977078	0.199614	-4.89483	9.84e-07	6.28e-06	10	80948623	81014945	-	protein_coding	Gng7	ENSMUSG00000048240	11122.6	26950	16835	22713.6	28844.9	19004.6	21877.1	20859.1	35122.6	21156.2	8246.4	13766.4	19601.8	8666.18	7097.37	10738.6	13543	10140.4	7230.28	6358.4	10	80948623	81014945	-	protein_coding	Gng7
ENSMUSG00000023945	295.954	-0.976304	0.289109	-3.37695	0.000732955	0.00258835	17	54273589	54299034	-	protein_coding	Slc5a7	ENSMUSG00000023945	129.849	600.517	216.147	354.01	667.062	265.458	479.547	469.991	730.239	326.641	102.684	163.987	418.06	112.535	45.6716	351.469	242.171	87.7259	87.0438	68.2707	17	54273589	54299034	-	protein_coding	Slc5a7
ENSMUSG00000110124	109.386	-0.975366	0.101977	-9.56457	1.13e-21	7.09e-20	7	12793827	12794869	-	processed_pseudogene	Gm4247	ENSMUSG00000110124	171.708	139.442	150.412	127.811	112.942	139.276	149.794	157.48	145.863	165.573	72.0973	79.8636	67.6412	62.9436	72.1611	91.8448	76.0845	72.7201	50.8697	81.1868	7	12793827	12794869	-	processed_pseudogene	Gm4247
ENSMUSG00000081683	352.434	-0.97531	0.152549	-6.39342	1.62e-10	1.97e-09	5	128600843	128604093	+	protein_coding	Fzd10	ENSMUSG00000081683	499.748	293.134	398.87	502.97	450.591	590.435	424.415	323.935	707.16	545.152	375.78	237.461	271.504	241.284	139.755	229.974	180.933	275.875	165.044	194.664	5	128600843	128604093	+	protein_coding	Fzd10
ENSMUSG00000107561	17.4602	-0.975087	0.278672	-3.49905	0.000466925	0.00171772	6	88445686	88446513	+	lncRNA	Gm44264	ENSMUSG00000107561	9.39697	11.1961	15.5983	38.6193	24.706	40.4734	40.5691	25.2947	21.2333	20.2742	3.27715	20.2321	9.39461	18.1201	0	5.7855	12.0622	10.3886	12.4348	10.1483	6	88445686	88446513	+	lncRNA	Gm44264
ENSMUSG00000107927	155.114	-0.974838	0.192091	-5.07488	3.88e-07	2.67e-06	6	86039933	86041767	+	TEC	Gm44090	ENSMUSG00000107927	103.367	69.2122	254.029	319.069	185.883	217.842	231.972	137.081	242.798	344.662	129.994	99.0309	85.4909	132.563	76.7283	103.416	111.343	79.6459	75.7394	102.406	6	86039933	86041767	+	TEC	Gm44090
ENSMUSG00000032380	167.451	-0.974368	0.11816	-8.24615	1.64e-16	5.07e-15	9	66158222	66272242	+	protein_coding	Dapk2	ENSMUSG00000032380	287.889	220.868	212.805	193.096	234.119	258.315	210.127	226.836	161.557	228.648	126.716	159.727	91.1277	93.4616	116.919	81.7202	106.704	144.286	97.2177	96.8706	9	66158222	66272242	+	protein_coding	Dapk2
ENSMUSG00000103160	19.8688	-0.974278	0.281616	-3.4596	0.00054098	0.0019632	14	21992435	21996100	+	TEC	C130012C08Rik	ENSMUSG00000103160	8.5427	36.6417	15.5983	42.2973	42.3532	26.1887	33.2875	26.9266	32.3115	19.1479	6.5543	5.32424	36.639	5.72214	11.8746	18.8029	12.99	2.30858	10.1739	3.69031	14	21992435	21996100	+	TEC	C130012C08Rik
ENSMUSG00000002664	19.7583	-0.973909	0.223948	-4.34882	1.37e-05	7.01e-05	17	56999456	57000018	-	protein_coding	Pspn	ENSMUSG00000002664	29.8994	18.3209	38.9957	11.9536	35.2943	29.7598	38.4886	21.2149	25.8492	22.5269	13.1086	4.25939	12.213	20.9812	10.9612	15.1869	14.8458	4.61715	14.6957	11.9935	17	56999456	57000018	-	protein_coding	Pspn
ENSMUSG00000027955	386.222	-0.973544	0.142526	-6.83064	8.45e-12	1.27e-10	3	79884532	79946280	+	protein_coding	Gask1b	ENSMUSG00000027955	726.129	466.164	504.715	515.843	403.532	434.494	483.708	455.304	456.977	729.873	428.214	257.693	252.715	266.08	179.033	180.074	292.276	311.658	189.914	190.051	3	79884532	79946280	+	protein_coding	Gask1b
ENSMUSG00000090610	569.786	-0.973239	0.0866719	-11.229	2.94e-29	4.57e-27	10	93778659	93779719	+	processed_pseudogene	Gm3571	ENSMUSG00000090610	832.059	718.585	831.165	708.02	937.652	673.763	695.916	709.883	672.079	803.086	432.584	494.09	420.878	396.735	338.883	387.628	374.855	357.829	287.131	322.902	10	93778659	93779719	+	processed_pseudogene	Gm3571
ENSMUSG00000030589	106.646	-0.972463	0.151096	-6.43608	1.23e-10	1.52e-09	7	29134850	29153961	+	protein_coding	Rasgrp4	ENSMUSG00000030589	154.623	185.244	168.238	131.489	104.706	128.563	175.799	105.258	131.092	145.299	98.3144	111.809	71.399	71.5268	46.585	55.6854	62.1666	51.9429	87.0438	46.1288	7	29134850	29153961	+	protein_coding	Rasgrp4
ENSMUSG00000106676	16.1976	-0.971855	0.297038	-3.27182	0.00106858	0.00362163	6	33039123	33042119	-	TEC	Gm42895	ENSMUSG00000106676	0	13.2317	8.91329	24.8267	21.1766	38.0926	38.4886	37.534	21.2333	30.4114	13.1086	17.0376	1.87892	10.4906	6.39402	7.23187	10.2065	9.2343	3.39132	11.0709	6	33039123	33042119	-	TEC	Gm42895
ENSMUSG00000101086	2.72494	-0.971698	0.326181	-2.97901	0.00289178	0.00872654	14	32685647	32689250	+	lncRNA	Gm28651	ENSMUSG00000101086	1.70854	0	8.91329	5.51704	7.05886	4.76158	7.28163	3.26383	3.69274	2.25269	2.18477	0	3.75784	0	0	0	0	0	2.26088	1.84515	14	32685647	32689250	+	lncRNA	Gm28651
ENSMUSG00000042258	263.727	-0.971566	0.321375	-3.02315	0.00250158	0.00768997	13	116298280	116309689	-	protein_coding	Isl1	ENSMUSG00000042258	75.1757	389.827	255.143	536.072	600.003	241.65	440.018	399.003	781.014	291.724	34.9562	71.3449	420.878	51.4993	23.7492	361.594	193.923	40.4001	15.8261	50.7417	13	116298280	116309689	-	protein_coding	Isl1
ENSMUSG00000087382	3.67057	-0.970862	0.32216	-3.0136	0.0025817	0.007906	2	173110817	173133204	+	lncRNA	Ctcflos	ENSMUSG00000087382	1.70854	18.3209	5.57081	3.67802	4.70591	3.57118	2.08047	18.767	3.69274	0	0	1.06485	1.87892	0	0	1.44637	0	6.92573	0	0	2	173110817	173133204	+	lncRNA	Ctcflos
ENSMUSG00000074207	23.934	-0.970097	0.241615	-4.01505	5.94e-05	0.000267297	3	138260990	138290698	+	protein_coding	Adh1	ENSMUSG00000074207	28.1909	14.2496	61.2789	65.2849	31.7649	20.2367	32.2472	31.0064	18.4637	27.0323	18.5705	18.1024	17.8498	15.259	8.22089	8.67825	7.42288	13.8515	27.1305	13.8387	3	138260990	138290698	+	protein_coding	Adh1
ENSMUSG00000117220	242.173	-0.970066	0.167169	-5.80289	6.52e-09	6.1e-08	17	66231948	66236369	-	lncRNA	Gm49932	ENSMUSG00000117220	351.105	258.528	307.509	394.468	248.237	409.496	415.053	321.487	230.796	322.135	294.943	199.127	153.132	163.081	73.988	92.568	118.766	190.457	153.74	144.845	17	66231948	66236369	-	lncRNA	Gm49932
ENSMUSG00000016252	5253.39	-0.969437	0.10053	-9.64326	5.25e-22	3.46e-20	2	174461071	174464105	-	protein_coding	Atp5e	ENSMUSG00000016252	4810.39	6363.45	6942.34	7434.21	7565.92	8489.89	8723.39	7400.73	6433.68	5774.78	4046.19	4507.5	3855.55	3467.62	2823.42	3036.66	2956.16	3630.23	3811.84	2993.76	2	174461071	174464105	-	protein_coding	Atp5e
ENSMUSG00000109751	46.6729	-0.969388	0.202852	-4.7788	1.76e-06	1.08e-05	8	46763250	46764973	-	lncRNA	Gm45479	ENSMUSG00000109751	27.3366	73.2835	45.6806	68.0434	44.7061	98.8027	90.5003	75.0681	65.5461	45.0539	51.342	42.5939	20.6681	32.4255	20.0955	18.8029	37.1144	25.3943	21.4783	29.5225	8	46763250	46764973	-	lncRNA	Gm45479
ENSMUSG00000020150	1435.81	-0.969145	0.13268	-7.3044	2.79e-13	5.23e-12	10	80258150	80261012	-	protein_coding	Gamt	ENSMUSG00000020150	1578.69	1968.48	2046.72	1812.35	2415.31	2035.57	2253.14	1861.2	1720.82	1507.05	1034.49	1503.57	1326.52	829.71	757.235	548.176	917.653	716.813	1062.61	820.171	10	80258150	80261012	-	protein_coding	Gamt
ENSMUSG00000042448	6.34396	-0.968373	0.315522	-3.06912	0.00214692	0.00670724	2	74762979	74765142	+	protein_coding	Hoxd1	ENSMUSG00000042448	3.41708	12.2139	8.91329	5.51704	16.4707	9.52315	12.4828	9.79149	13.8478	2.25269	7.64668	8.51879	7.51568	1.90738	1.82686	0	0.92786	0	2.26088	1.84515	2	74762979	74765142	+	protein_coding	Hoxd1
ENSMUSG00000028214	120.151	-0.967745	0.175213	-5.52323	3.33e-08	2.76e-07	4	11704456	11714752	+	protein_coding	Gem	ENSMUSG00000028214	145.226	271.76	215.033	103.904	198.825	146.418	135.23	139.529	137.555	126.151	101.592	138.43	99.5828	58.1751	52.9791	72.3187	60.3109	71.5658	81.3916	47.0514	4	11704456	11714752	+	protein_coding	Gem
ENSMUSG00000028175	3.93173	-0.967141	0.314656	-3.07365	0.00211458	0.00661846	3	159495432	159529955	+	protein_coding	Depdc1a	ENSMUSG00000028175	5.12562	8.14261	3.34249	10.1146	7.05886	9.52315	4.16093	3.26383	3.69274	4.50539	0	2.1297	5.63676	0.95369	0	2.89275	2.78358	3.46286	0	1.84515	3	159495432	159529955	+	protein_coding	Depdc1a
ENSMUSG00000086909	8.32815	-0.966596	0.300539	-3.21621	0.00129897	0.00430352	11	46636515	46645006	-	lncRNA	Gm4926	ENSMUSG00000086909	5.12562	15.2674	24.5116	17.4706	25.8825	2.38079	10.4023	9.79149	5.53911	4.50539	4.36953	6.38909	1.87892	5.72214	3.65373	2.89275	11.1343	4.61715	2.26088	2.76773	11	46636515	46645006	-	lncRNA	Gm4926
ENSMUSG00000044927	2529.27	-0.966517	0.0806199	-11.9886	4.08e-33	9.7e-31	6	87980420	87981637	-	protein_coding	H1f10	ENSMUSG00000044927	2553.41	2898.77	3292.35	3518.03	3825.9	3936.63	3970.57	3306.26	3424.09	2854.16	1883.27	1787.88	1814.1	1579.31	1750.14	1679.96	1486.43	1717.58	1917.22	1389.4	6	87980420	87981637	-	protein_coding	H1f10
ENSMUSG00000010064	5093.53	-0.966012	0.0969302	-9.96606	2.15e-23	1.7e-21	9	107650633	107669530	-	protein_coding	Slc38a3	ENSMUSG00000010064	6905.06	7453.54	7506.11	6944.11	6930.63	6582.88	6570.11	4881.87	7102.98	6850.44	4289.79	3789.8	4285.82	3449.5	2486.36	2817.54	3207.61	3984.6	2680.27	3151.52	9	107650633	107669530	-	protein_coding	Slc38a3
ENSMUSG00000005973	1284.08	-0.965949	0.126697	-7.62408	2.46e-14	5.54e-13	2	105386290	105399319	-	protein_coding	Rcn1	ENSMUSG00000005973	1118.24	1787.3	1694.64	1812.35	2025.89	1566.56	1829.77	1803.27	1983.92	1517.19	1154.65	1296.99	954.492	747.693	728.919	598.799	724.659	806.847	951.829	577.533	2	105386290	105399319	-	protein_coding	Rcn1
ENSMUSG00000114149	8.67621	-0.96586	0.28747	-3.35986	0.000779811	0.00273096	12	106131977	106145400	-	lncRNA	Gm47646	ENSMUSG00000114149	18.7939	10.1783	14.4841	5.51704	4.70591	23.8079	16.6437	9.79149	9.23185	11.2635	4.36953	0	4.6973	1.90738	3.65373	11.571	3.71144	4.61715	9.04351	5.53546	12	106131977	106145400	-	lncRNA	Gm47646
ENSMUSG00000029819	7806.67	-0.964156	0.110033	-8.76241	1.91e-18	7.62e-17	6	49822709	49829507	+	protein_coding	Npy	ENSMUSG00000029819	10505.8	9812.86	11879.2	9830.44	9908.29	12506.3	12263.3	9483.05	8680.71	9052.45	6289.94	6172.93	4287.7	5814.65	4736.14	5055.08	3419.16	7121.96	5518.8	3794.56	6	49822709	49829507	+	protein_coding	Npy
ENSMUSG00000030230	21.5851	-0.963929	0.245439	-3.92737	8.59e-05	0.000373931	6	139989672	140041457	-	protein_coding	Plcz1	ENSMUSG00000030230	24.7738	19.3387	50.1373	33.1022	34.1178	20.2367	32.2472	31.0064	40.6201	12.3898	9.83144	8.51879	19.7287	12.398	13.7015	15.1869	9.2786	13.8515	29.3914	1.84515	6	139989672	140041457	-	protein_coding	Plcz1
ENSMUSG00000001029	106.443	-0.963794	0.106914	-9.01464	1.98e-19	9.02e-18	11	106377655	106388075	-	protein_coding	Icam2	ENSMUSG00000001029	154.623	113.997	162.668	161.833	128.236	149.99	161.236	129.737	126.476	125.025	67.7277	87.3176	53.5493	82.971	69.4208	58.5782	62.1666	75.0287	88.1742	70.1158	11	106377655	106388075	-	protein_coding	Icam2
ENSMUSG00000021541	227.352	-0.962667	0.137817	-6.98512	2.85e-12	4.62e-11	13	56773112	56895993	-	protein_coding	Trpc7	ENSMUSG00000021541	224.673	332.829	372.13	369.641	254.119	263.077	291.265	302.72	409.894	218.511	136.548	151.208	240.502	127.794	175.379	166.333	154.025	124.663	141.305	90.4125	13	56773112	56895993	-	protein_coding	Trpc7
ENSMUSG00000098931	12.2161	-0.962408	0.318304	-3.02355	0.0024983	0.00768319	12	93927337	93927464	+	miRNA	Mir8099-2	ENSMUSG00000098931	5.12562	2.03565	2.22832	22.9876	0	29.7598	46.8105	48.1415	25.8492	28.1587	1.09238	1.06485	19.7287	2.86107	1.82686	0	0.92786	3.46286	2.26088	0	12	93927337	93927464	+	miRNA	Mir8099-2
ENSMUSG00000010044	218.275	-0.961023	0.169039	-5.68521	1.31e-08	1.16e-07	9	107547297	107551319	+	protein_coding	Zmynd10	ENSMUSG00000010044	132.412	311.455	311.965	406.422	367.061	322.597	341.196	246.419	259.415	235.407	101.592	139.495	128.706	82.971	116.919	108.478	253.306	180.069	162.783	156.838	9	107547297	107551319	+	protein_coding	Zmynd10
ENSMUSG00000105683	93.4182	-0.959912	0.175269	-5.47679	4.33e-08	3.53e-07	3	158488990	158490021	+	TEC	Gm43487	ENSMUSG00000105683	44.422	107.89	93.5896	144.362	104.706	169.036	174.759	148.504	136.631	134.035	84.1135	61.7612	54.4887	69.6194	47.4985	82.4434	54.7437	68.103	45.2175	42.4385	3	158488990	158490021	+	TEC	Gm43487
ENSMUSG00000085068	3.56771	-0.959652	0.317713	-3.0205	0.00252358	0.00774911	8	110805637	110807477	+	lncRNA	Gm15895	ENSMUSG00000085068	1.70854	5.08913	5.57081	5.51704	9.41182	5.95197	7.28163	5.7117	2.76955	4.50539	5.46191	0	1.87892	1.90738	0	0.723187	3.71144	2.30858	0	1.84515	8	110805637	110807477	+	lncRNA	Gm15895
ENSMUSG00000112257	85.0972	-0.959477	0.227927	-4.20958	2.56e-05	0.000124667	10	52801492	52801700	+	TEC	Gm47623	ENSMUSG00000112257	27.3366	105.854	96.9321	137.926	98.8241	204.748	188.282	96.2829	119.091	90.1078	84.1135	99.0309	50.7309	41.0087	22.8358	47.7304	69.5895	33.4743	37.3045	50.7417	10	52801492	52801700	+	TEC	Gm47623
ENSMUSG00000090206	6.13784	-0.959067	0.316951	-3.02592	0.00247881	0.0076318	8	95310565	95326323	+	protein_coding	Tepp	ENSMUSG00000090206	7.68843	14.2496	4.45665	12.8731	8.23534	4.76158	15.6035	4.07979	7.38548	12.3898	8.73906	4.25939	3.75784	7.62952	0	4.33912	0	2.30858	0	0	8	95310565	95326323	+	protein_coding	Tepp
ENSMUSG00000112712	121.991	-0.958088	0.197061	-4.86188	1.16e-06	7.33e-06	10	130469510	130470609	-	processed_pseudogene	Gm18755	ENSMUSG00000112712	162.311	111.961	110.302	201.372	278.825	120.23	179.96	135.449	223.411	126.151	75.3744	107.55	92.0671	128.748	45.6716	53.5159	30.6194	117.737	71.2176	67.3481	10	130469510	130470609	-	processed_pseudogene	Gm18755
ENSMUSG00000010122	131.105	-0.957521	0.273067	-3.50655	0.00045396	0.00167532	11	61343400	61378345	-	protein_coding	Slc47a1	ENSMUSG00000010122	149.497	144.531	513.629	140.684	211.766	123.801	97.7819	175.431	154.172	129.53	155.118	159.727	120.251	35.2865	42.9313	29.6507	45.4651	55.4058	70.0872	67.3481	11	61343400	61378345	-	protein_coding	Slc47a1
ENSMUSG00000018634	2112.74	-0.957231	0.119849	-7.98699	1.38e-15	3.74e-14	11	104132854	104175523	+	protein_coding	Crhr1	ENSMUSG00000018634	3390.6	2627.01	2689.59	2803.57	2577.66	3229.54	3155.03	2720.4	2237.8	2682.96	1933.52	1705.89	1554.81	1600.29	1133.57	1086.95	1056.83	1875.72	878.351	1314.67	11	104132854	104175523	+	protein_coding	Crhr1
ENSMUSG00000058537	3.71101	-0.956943	0.312698	-3.06028	0.00221132	0.00689249	10	58222971	58224930	-	protein_coding	AW822073	ENSMUSG00000058537	0	2.03565	0	7.35605	29.4119	5.95197	9.3621	8.97553	0	3.37904	0	0	0	0	0	2.89275	1.85572	1.15429	0	1.84515	10	58222971	58224930	-	protein_coding	AW822073
ENSMUSG00000063018	459.526	-0.956438	0.130131	-7.34981	1.98e-13	3.81e-12	X	7411816	7445143	-	lncRNA	2010204K13Rik	ENSMUSG00000063018	394.673	500.77	724.205	637.218	595.297	657.097	701.117	730.282	738.548	442.654	308.052	436.588	381.421	255.589	302.346	230.697	248.666	255.098	400.175	250.018	X	7411816	7445143	-	lncRNA	2010204K13Rik
ENSMUSG00000032193	1527.67	-0.955768	0.12225	-7.81816	5.36e-15	1.35e-13	9	21723482	21749919	+	protein_coding	Ldlr	ENSMUSG00000032193	2353.51	1956.26	1928.61	1726.83	2465.9	1748.69	1909.87	1425.48	2121.48	2693.1	1251.87	1560	1035.29	897.422	685.074	1061.64	908.375	1119.66	829.742	874.603	9	21723482	21749919	+	protein_coding	Ldlr
ENSMUSG00000050304	9.08022	-0.955519	0.295867	-3.22956	0.00123983	0.00412904	18	37637377	37638723	-	protein_coding	Slc25a2	ENSMUSG00000050304	2.56281	19.3387	14.4841	15.6316	11.7648	8.33276	28.0863	4.07979	12.9246	13.5162	6.5543	2.1297	5.63676	9.5369	9.13432	4.33912	5.56716	3.46286	4.52175	0	18	37637377	37638723	-	protein_coding	Slc25a2
ENSMUSG00000087211	5.46743	-0.955051	0.326373	-2.92626	0.00343066	0.0101807	11	84525659	84535831	+	lncRNA	Lhx1os	ENSMUSG00000087211	0	5.08913	6.68497	2.75852	11.7648	7.14236	5.20116	31.0064	18.4637	0	0	0	3.75784	1.90738	3.65373	4.33912	1.85572	3.46286	2.26088	0	11	84525659	84535831	+	lncRNA	Lhx1os
ENSMUSG00000021678	10.9242	-0.954862	0.271704	-3.51434	0.000440844	0.00163313	13	95511731	95525227	-	protein_coding	F2rl1	ENSMUSG00000021678	20.5025	26.4635	20.0549	7.35605	9.41182	7.14236	12.4828	10.6074	19.3869	20.2742	2.18477	4.25939	4.6973	9.5369	7.30746	8.67825	14.8458	6.92573	4.52175	1.84515	13	95511731	95525227	-	protein_coding	F2rl1
ENSMUSG00000031349	1305.22	-0.954625	0.0788928	-12.1003	1.05e-33	2.61e-31	X	72918556	72958514	+	protein_coding	Nsdhl	ENSMUSG00000031349	1824.72	1646.84	1809.4	1660.63	1774.13	1528.47	1788.16	1636.81	1682.97	1922.67	1138.26	1101.05	996.768	898.376	782.811	788.997	755.278	803.384	833.133	731.603	X	72918556	72958514	+	protein_coding	Nsdhl
ENSMUSG00000105041	15.8219	-0.953706	0.254482	-3.74764	0.000178505	0.000724518	5	13525722	13528408	+	TEC	Gm42676	ENSMUSG00000105041	11.9598	14.2496	22.2832	14.7121	16.4707	35.7118	38.4886	20.3989	25.8492	19.1479	6.5543	23.4267	12.213	15.259	5.48059	4.33912	7.42288	4.61715	6.78263	11.0709	5	13525722	13528408	+	TEC	Gm42676
ENSMUSG00000109844	6.86542	-0.951677	0.301975	-3.1515	0.00162433	0.00524851	9	47242325	47368649	-	lncRNA	Gm31816	ENSMUSG00000109844	13.6683	10.1783	8.91329	11.0341	4.70591	15.4751	10.4023	12.2394	8.30866	4.50539	2.18477	4.25939	3.75784	0.95369	10.0478	5.7855	0	0	9.04351	1.84515	9	47242325	47368649	-	lncRNA	Gm31816
ENSMUSG00000038077	5235.82	-0.951635	0.0968438	-9.8265	8.66e-23	6.28e-21	6	126708328	126740674	-	protein_coding	Kcna6	ENSMUSG00000038077	7223.7	7325.29	6248.22	6659.06	7388.27	6962.61	6938.35	6663.92	6494.61	7474.44	4979.08	4932.38	3491.98	3363.67	2674.53	2927.46	2951.52	3600.22	3489.66	2927.34	6	126708328	126740674	-	protein_coding	Kcna6
ENSMUSG00000025739	820.059	-0.951564	0.0936575	-10.16	2.99e-24	2.59e-22	17	25717170	25719406	+	protein_coding	Gng13	ENSMUSG00000025739	810.702	968.97	1121.96	1148.46	1235.3	1401.09	1221.23	1153.76	916.723	884.183	599.718	601.639	538.311	648.509	536.185	506.954	426.816	618.698	557.306	504.649	17	25717170	25719406	+	protein_coding	Gng13
ENSMUSG00000063694	758.501	-0.951515	0.0860463	-11.0582	2e-28	2.76e-26	6	50562562	50566538	-	protein_coding	Cycs	ENSMUSG00000063694	909.797	939.453	1013.89	1036.28	970.593	1088.02	1099.53	1170.9	889.027	917.973	606.272	692.152	542.069	514.993	420.179	444.76	408.258	534.435	516.61	454.83	6	50562562	50566538	-	protein_coding	Cycs
ENSMUSG00000027887	202.133	-0.951009	0.127914	-7.43474	1.05e-13	2.11e-12	3	108211471	108226648	-	protein_coding	Sypl2	ENSMUSG00000027887	297.286	300.259	280.769	237.233	231.766	263.077	269.42	245.603	237.259	323.262	198.814	188.478	159.708	131.609	104.131	79.5506	104.848	147.749	131.131	110.709	3	108211471	108226648	-	protein_coding	Sypl2
ENSMUSG00000109556	11.6723	-0.950913	0.26395	-3.60262	0.000315021	0.00120705	6	82803768	82805083	-	lncRNA	Gm38843	ENSMUSG00000109556	5.12562	11.1961	24.5116	28.5047	16.4707	30.9502	13.523	14.6872	10.155	7.88443	5.46191	9.58364	5.63676	10.4906	7.30746	6.50869	4.6393	3.46286	9.04351	8.30319	6	82803768	82805083	-	lncRNA	Gm38843
ENSMUSG00000049422	3880.07	-0.950263	0.079986	-11.8804	1.5e-32	3.28e-30	10	75933129	75937747	+	protein_coding	Chchd10	ENSMUSG00000049422	4500.29	4609.73	4817.64	5215.44	6032.97	5428.2	5807.62	5722.31	4771.94	4404.02	2976.74	3254.18	2852.2	2754.26	2319.2	2225.25	2261.19	2510.58	2858.88	2278.76	10	75933129	75937747	+	protein_coding	Chchd10
ENSMUSG00000017652	37.6265	-0.94976	0.184236	-5.15514	2.53e-07	1.8e-06	2	165055626	165072948	+	protein_coding	Cd40	ENSMUSG00000017652	77.7385	34.6061	47.909	62.5264	36.4708	71.4236	47.8507	52.2213	40.6201	34.9168	30.5867	23.4267	33.8206	19.0738	18.2686	20.2492	34.3308	13.8515	20.3479	32.2902	2	165055626	165072948	+	protein_coding	Cd40
ENSMUSG00000105008	7.16665	-0.949427	0.27743	-3.42222	0.00062112	0.00222643	3	127863183	127863858	-	TEC	Gm43652	ENSMUSG00000105008	9.39697	8.14261	3.34249	11.0341	11.7648	11.9039	13.523	8.15957	15.6941	7.88443	2.18477	0	5.63676	7.62952	1.82686	3.61594	3.71144	5.77144	5.65219	6.45804	3	127863183	127863858	-	TEC	Gm43652
ENSMUSG00000104225	1.58748	-0.94929	0.322586	-2.94276	0.00325305	0.00969538	18	37618905	37619766	+	lncRNA	4930517L18Rik	ENSMUSG00000104225	0	2.03565	3.34249	3.67802	2.35295	2.38079	3.1207	5.7117	0.923185	3.37904	0	1.06485	0.939461	1.90738	0.913432	0	0	0	0	0	18	37618905	37619766	+	lncRNA	4930517L18Rik
ENSMUSG00000053093	317.921	-0.949173	0.218873	-4.33664	1.45e-05	7.38e-05	14	54970683	54994626	-	protein_coding	Myh7	ENSMUSG00000053093	165.728	460.057	406.669	444.121	450.591	441.636	417.133	547.507	617.611	375.074	107.054	307.741	293.112	102.999	184.513	245.884	291.348	207.772	212.522	79.3416	14	54970683	54994626	-	protein_coding	Myh7
ENSMUSG00000110027	58.1215	-0.948936	0.212644	-4.46255	8.1e-06	4.33e-05	7	136268323	136318513	+	lncRNA	C030029H02Rik	ENSMUSG00000110027	44.422	54.9626	75.763	94.7091	105.883	88.0892	114.426	67.7244	72.9316	69.8335	46.9725	67.0855	67.6412	26.7033	21.0089	13.7406	41.7537	24.24	24.8696	39.6708	7	136268323	136318513	+	lncRNA	C030029H02Rik
ENSMUSG00000029875	2167.07	-0.948826	0.127526	-7.44024	1.01e-13	2.03e-12	15	98167157	98170134	+	protein_coding	Ccdc184	ENSMUSG00000029875	3165.92	2704.36	2587.08	2461.52	3289.43	2677.2	2875.2	3360.11	2919.11	2770.81	2239.38	2090.3	1660.97	1391.43	1068.72	980.642	970.541	1642.55	1212.96	1273.16	15	98167157	98170134	+	protein_coding	Ccdc184
ENSMUSG00000087410	18.6471	-0.948383	0.278774	-3.40198	0.000669003	0.0023837	11	67112460	67120080	-	lncRNA	2310065F04Rik	ENSMUSG00000087410	41.8592	12.2139	32.3107	30.3437	14.1177	40.4734	10.4023	26.9266	26.7724	25.906	27.3096	19.1673	9.39461	7.62952	5.48059	0.723187	9.2786	18.4686	6.78263	7.38061	11	67112460	67120080	-	lncRNA	2310065F04Rik
ENSMUSG00000095891	1.93912	-0.948271	0.301028	-3.15011	0.00163209	0.00526904	9	3025416	3033289	+	protein_coding	Gm10717	ENSMUSG00000095891	0	4.0713	0	9.19506	8.23534	0	5.20116	3.26383	0.923185	5.63174	0	0	0	0	0	0	0	0	2.26088	0	9	3025416	3033289	+	protein_coding	Gm10717
ENSMUSG00000022018	1319.2	-0.948245	0.0988128	-9.59638	8.28e-22	5.33e-20	14	79288755	79301645	-	protein_coding	Rgcc	ENSMUSG00000022018	1601.76	1799.52	1599.94	1782	1972.95	2102.24	1639.41	1563.37	1686.66	1721.06	1132.8	1268.23	919.732	833.525	790.119	655.208	862.91	963.83	676.002	812.79	14	79288755	79301645	-	protein_coding	Rgcc
ENSMUSG00000082082	6.9456	-0.94765	0.323606	-2.92841	0.00340704	0.0101159	4	145446739	145450888	+	transcribed_unprocessed_pseudogene	Gm13230	ENSMUSG00000082082	0.85427	0	12.2558	13.7926	4.70591	26.1887	20.8047	22.8468	13.8478	0	0	0	0	4.76845	0	0.723187	1.85572	6.92573	5.65219	3.69031	4	145446739	145450888	+	transcribed_unprocessed_pseudogene	Gm13230
ENSMUSG00000056708	6814.68	-0.946772	0.141853	-6.67432	2.48e-11	3.48e-10	1	155096360	155099636	-	protein_coding	Ier5	ENSMUSG00000056708	12048.6	10180.3	8629.18	6584.58	9709.46	7825.65	9348.57	11960.3	6405.06	8088.3	7253.42	6713.87	4149.6	3899.64	3674.74	3211.68	3179.78	4959.97	3686.36	4784.48	1	155096360	155099636	-	protein_coding	Ier5
ENSMUSG00000002012	4894.35	-0.946278	0.10345	-9.14718	5.84e-20	2.88e-18	X	73655993	73660117	-	protein_coding	Pnck	ENSMUSG00000002012	4588.28	5780.23	6660.46	6509.18	6295.33	6441.22	7373.17	7745.88	7763.06	5668.91	2621.72	2942.18	3740.93	3946.37	4120.49	3999.95	2649.97	3285.1	3234.18	2520.48	X	73655993	73660117	-	protein_coding	Pnck
ENSMUSG00000117011	203.017	-0.945962	0.170075	-5.56204	2.67e-08	2.26e-07	17	43146040	43158291	-	lncRNA	E130008D07Rik	ENSMUSG00000117011	114.472	357.257	356.532	287.805	261.178	238.079	265.259	247.235	378.506	215.132	88.483	149.079	178.498	144.007	102.304	192.368	175.366	117.737	110.783	80.2642	17	43146040	43158291	-	lncRNA	E130008D07Rik
ENSMUSG00000117916	15.3412	-0.945919	0.249591	-3.78987	0.000150727	0.000621715	17	27235074	27248066	-	lncRNA	9630028I04Rik	ENSMUSG00000117916	18.7939	20.3565	33.4249	16.5511	30.5884	4.76158	22.8851	17.9511	22.1564	24.7796	0	9.58364	5.63676	13.3517	10.9612	11.571	9.2786	10.3886	9.04351	14.7612	17	27235074	27248066	-	lncRNA	9630028I04Rik
ENSMUSG00000052125	1380.34	-0.945829	0.0787698	-12.0075	3.24e-33	7.77e-31	12	33111710	33147597	-	lncRNA	F730043M19Rik	ENSMUSG00000052125	1724.77	1645.82	1946.44	1676.26	1596.48	1776.07	1883.86	2058.66	1969.15	1954.21	862.982	1052.07	1163.05	1027.12	964.584	826.603	862.91	792.996	1081.83	740.829	12	33111710	33147597	-	lncRNA	F730043M19Rik
ENSMUSG00000114017	3.40929	-0.94544	0.326516	-2.89554	0.00378509	0.0111104	13	6995653	7076316	-	lncRNA	Gm40662	ENSMUSG00000114017	1.70854	8.14261	4.45665	5.51704	3.52943	2.38079	9.3621	2.44787	10.155	6.75808	1.09238	4.25939	0	0.95369	0.913432	6.50869	0	0	0	0	13	6995653	7076316	-	lncRNA	Gm40662
ENSMUSG00000039194	1209.67	-0.945219	0.138592	-6.82018	9.09e-12	1.36e-10	7	79374869	79387048	-	protein_coding	Rlbp1	ENSMUSG00000039194	1360.85	1652.95	1997.69	1430.75	1723.54	1774.88	1697.66	1268	1478.02	1714.3	1063.98	1272.49	1146.14	759.137	582.77	511.293	799.815	798.767	540.35	619.972	7	79374869	79387048	-	protein_coding	Rlbp1
ENSMUSG00000067818	810.346	-0.944661	0.130031	-7.26487	3.73e-13	6.86e-12	2	156775419	156781658	+	protein_coding	Myl9	ENSMUSG00000067818	877.335	1087.04	1554.26	1252.37	994.123	1139.21	1269.08	871.442	915.799	805.338	656.522	815.674	557.1	589.381	369.026	383.289	506.611	590.995	541.48	430.843	2	156775419	156781658	+	protein_coding	Myl9
ENSMUSG00000100807	9.54603	-0.943381	0.312803	-3.0159	0.00256221	0.00785204	9	101770368	101862489	-	lncRNA	Gm29521	ENSMUSG00000100807	8.5427	31.5526	26.7399	14.7121	22.3531	13.0943	7.28163	3.26383	12.9246	0	9.83144	5.32424	8.45515	3.81476	3.65373	1.44637	9.2786	1.15429	5.65219	1.84515	9	101770368	101862489	-	lncRNA	Gm29521
ENSMUSG00000041735	4.14159	-0.943148	0.320468	-2.94304	0.0032501	0.0096883	4	144703190	144721404	-	protein_coding	AAdacl4fm3	ENSMUSG00000041735	0.85427	0	1.11416	5.51704	15.2942	20.2367	9.3621	10.6074	7.38548	0	0	0	0	1.90738	0	0.723187	0	3.46286	4.52175	1.84515	4	144703190	144721404	-	protein_coding	AAdacl4fm3
ENSMUSG00000025499	12802.2	-0.942731	0.0678834	-13.8875	7.54e-44	4.11e-41	7	141189104	141194005	-	protein_coding	Hras	ENSMUSG00000025499	13973.3	15383.4	16349.2	17647.2	19051.9	18065.4	18851.1	16914.8	16740.1	15860.1	10011.7	9757.21	9463.19	9439.63	7330.29	8018.7	7851.55	9227.38	7841.85	8266.29	7	141189104	141194005	-	protein_coding	Hras
ENSMUSG00000050201	95.5772	-0.941912	0.191386	-4.92152	8.59e-07	5.55e-06	11	115307162	115332303	+	protein_coding	Otop2	ENSMUSG00000050201	137.537	174.048	170.467	137.006	135.295	109.516	102.983	132.185	98.7808	87.8551	58.9887	35.14	143.737	34.3328	40.191	45.5608	53.8159	73.8744	80.2611	59.9675	11	115307162	115332303	+	protein_coding	Otop2
ENSMUSG00000046321	3109.95	-0.941405	0.145684	-6.46194	1.03e-10	1.3e-09	7	121391858	121501770	+	protein_coding	Hs3st2	ENSMUSG00000046321	5348.58	4914.06	3699.02	3964.91	4274.14	4144.95	3865.51	3775.43	3134.21	4281.25	3661.67	3220.1	1813.16	2029.45	1178.33	1677.07	1469.73	2093.88	1762.35	1891.28	7	121391858	121501770	+	protein_coding	Hs3st2
ENSMUSG00000092603	64.1052	-0.94112	0.198774	-4.73461	2.19e-06	1.32e-05	6	110738349	110738481	+	processed_pseudogene	Gm20386	ENSMUSG00000092603	25.6281	72.2656	66.8497	110.341	72.9416	133.324	128.989	77.5159	87.7026	88.9814	43.6953	71.3449	38.5179	38.1476	31.0567	45.5608	22.2686	42.7086	41.8262	42.4385	6	110738349	110738481	+	processed_pseudogene	Gm20386
ENSMUSG00000020218	97.234	-0.940908	0.184732	-5.09337	3.52e-07	2.44e-06	10	121033959	121100650	+	protein_coding	Wif1	ENSMUSG00000020218	140.955	141.478	149.298	110.341	163.53	152.37	128.989	97.9149	96.0112	123.898	123.439	83.0582	58.2466	57.2214	60.2865	54.9622	18.5572	88.8802	46.348	48.8966	10	121033959	121100650	+	protein_coding	Wif1
ENSMUSG00000092622	6.87312	-0.940679	0.317484	-2.96291	0.00304743	0.00914553	9	73101835	73104438	+	protein_coding	Khdc3	ENSMUSG00000092622	7.68843	10.1783	21.1691	6.43654	4.70591	3.57118	22.8851	16.3191	8.30866	1.12635	1.09238	4.25939	7.51568	7.62952	2.7403	4.33912	0	0	5.65219	1.84515	9	73101835	73104438	+	protein_coding	Khdc3
ENSMUSG00000027643	5.9014	-0.940144	0.314079	-2.99333	0.00275947	0.00838347	2	157329496	157347506	-	protein_coding	Ghrh	ENSMUSG00000027643	10.2512	13.2317	4.45665	8.27555	2.35295	3.57118	4.16093	11.4234	14.771	14.6425	0	1.06485	3.75784	0	9.13432	4.33912	3.71144	2.30858	5.65219	0.922577	2	157329496	157347506	-	protein_coding	Ghrh
ENSMUSG00000030854	12421.5	-0.939995	0.0782157	-12.018	2.86e-33	6.89e-31	7	47077794	47133684	-	protein_coding	Ptpn5	ENSMUSG00000030854	15452.9	17631.8	13440.1	16312	18181.3	14568	15789.7	17009.4	19165.3	16290.4	8772.93	10576.1	9650.14	7420.66	8047.34	7876.96	7386.69	9818.37	7993.33	7045.72	7	47077794	47133684	-	protein_coding	Ptpn5
ENSMUSG00000027602	14970.8	-0.939452	0.0665676	-14.1128	3.17e-45	1.98e-42	2	155276296	155278073	+	protein_coding	Map1lc3a	ENSMUSG00000027602	16982.9	18225.2	19935.7	19838.3	21723.6	21293.8	22046.7	19638.5	18653.9	18922.6	11993.3	11583.4	10649.7	10841.6	9381.86	9551.14	8402.7	10998.1	9843.86	8908.4	2	155276296	155278073	+	protein_coding	Map1lc3a
ENSMUSG00000079061	7.34725	-0.939024	0.279682	-3.35747	0.000786604	0.00275047	12	74315109	74316394	-	protein_coding	Gm11042	ENSMUSG00000079061	11.9598	10.1783	5.57081	10.1146	4.70591	10.7135	16.6437	8.15957	17.5405	7.88443	7.64668	4.25939	2.81838	0.95369	8.22089	5.06231	4.6393	1.15429	2.26088	6.45804	12	74315109	74316394	-	protein_coding	Gm11042
ENSMUSG00000108111	15.7701	-0.938389	0.264137	-3.55266	0.00038136	0.00143341	6	90486392	90519480	+	lncRNA	Gm45901	ENSMUSG00000108111	22.211	18.3209	21.1691	21.1486	22.3531	45.235	20.8047	26.1106	12.9246	7.88443	18.5705	18.1024	0.939461	6.67583	8.22089	5.06231	5.56716	10.3886	13.5653	10.1483	6	90486392	90519480	+	lncRNA	Gm45901
ENSMUSG00000006235	423.908	-0.938323	0.0967117	-9.70227	2.95e-22	2e-20	9	21958896	21963506	-	protein_coding	Epor	ENSMUSG00000006235	513.416	464.129	549.282	490.097	542.356	621.386	659.508	568.722	630.535	558.668	337.546	340.752	386.118	289.922	229.271	258.178	279.286	262.023	289.392	207.58	9	21958896	21963506	-	protein_coding	Epor
ENSMUSG00000105686	88.4156	-0.937721	0.149475	-6.27344	3.53e-10	4.04e-09	5	99274094	99279284	+	lncRNA	Gm35394	ENSMUSG00000105686	102.512	91.6043	155.983	133.328	148.236	133.324	127.949	101.995	72.9316	110.382	61.1734	47.9182	58.2466	43.8698	80.382	44.1144	87.2188	60.023	40.6958	66.4255	5	99274094	99279284	+	lncRNA	Gm35394
ENSMUSG00000038370	10152.3	-0.937308	0.146497	-6.39816	1.57e-10	1.92e-09	1	171173261	171196268	-	protein_coding	Pcp4l1	ENSMUSG00000038370	8095.06	18375.8	14168.8	14466.6	16534.2	11989.6	14242.9	11847.7	15253.8	10075.2	5735.01	7098.28	12194.2	6116.02	4779.08	7504.52	8268.16	6096.95	5663.5	4540.92	1	171173261	171196268	-	protein_coding	Pcp4l1
ENSMUSG00000099267	20.2925	-0.936073	0.203771	-4.59375	4.35e-06	2.47e-05	15	78891839	78891913	+	miRNA	Mir6955	ENSMUSG00000099267	39.2964	26.4635	28.9682	14.7121	18.8236	24.9983	26.0058	41.6138	24.926	28.1587	14.201	8.51879	13.1524	18.1201	10.0478	15.9101	12.99	6.92573	13.5653	18.4515	15	78891839	78891913	+	miRNA	Mir6955
ENSMUSG00000031552	49.5918	-0.93576	0.262583	-3.56367	0.000365699	0.00138054	8	24602245	24674755	-	protein_coding	Adam18	ENSMUSG00000031552	97.3867	52.927	33.4249	76.319	107.059	91.6603	82.1784	47.3255	67.3925	31.5377	13.1086	1.06485	34.76	33.3792	27.403	15.1869	27.8358	47.3258	41.8262	62.7352	8	24602245	24674755	-	protein_coding	Adam18
ENSMUSG00000022738	4.70876	-0.93568	0.32445	-2.8839	0.00392785	0.0114815	16	17913106	17915059	-	protein_coding	Gsc2	ENSMUSG00000022738	1.70854	10.1783	8.91329	7.35605	15.2942	5.95197	2.08047	8.15957	10.155	2.25269	4.36953	0	7.51568	3.81476	0	0	1.85572	2.30858	2.26088	0	16	17913106	17915059	-	protein_coding	Gsc2
ENSMUSG00000022840	19879.3	-0.935376	0.135408	-6.90781	4.92e-12	7.71e-11	16	35154876	35305738	+	protein_coding	Adcy5	ENSMUSG00000022840	18354.8	29726.6	19641.6	24781.6	32131.9	21396.1	25473.2	24755.3	41619.9	25916.1	11356.4	17913.9	19815.1	10451.5	11126.5	15004.7	14525.6	11914.6	12041.4	9639.08	16	35154876	35305738	+	protein_coding	Adcy5
ENSMUSG00000083421	360.373	-0.93535	0.24994	-3.7423	0.000182341	0.00073911	X	87771338	87772352	-	processed_pseudogene	Gm14776	ENSMUSG00000083421	103.367	426.469	295.253	662.044	409.414	947.554	932.049	462.648	393.277	324.388	238.139	372.697	185.074	273.709	129.707	184.413	229.181	135.052	206.87	296.147	X	87771338	87772352	-	processed_pseudogene	Gm14776
ENSMUSG00000069554	9.39177	-0.935027	0.292711	-3.19437	0.00140136	0.00459939	19	38051773	38054528	-	lncRNA	I830134H01Rik	ENSMUSG00000069554	25.6281	20.3565	8.91329	11.0341	7.05886	2.38079	4.16093	9.79149	16.6173	27.0323	10.9238	5.32424	3.75784	5.72214	3.65373	2.89275	3.71144	9.2343	2.26088	7.38061	19	38051773	38054528	-	lncRNA	I830134H01Rik
ENSMUSG00000037984	3716.97	-0.93494	0.132448	-7.05891	1.68e-12	2.79e-11	6	55677821	55681263	-	protein_coding	Neurod6	ENSMUSG00000037984	7093	5523.74	4117.94	4376.85	4995.32	5121.07	4773.63	4530.19	3222.84	5537.12	3869.22	3425.62	2012.32	2204.93	1924.6	1859.31	1944.79	2831.47	2312.88	2662.56	6	55677821	55681263	-	protein_coding	Neurod6
ENSMUSG00000031872	1077.92	-0.934842	0.104094	-8.98077	2.69e-19	1.22e-17	8	104170441	104219122	+	protein_coding	Bean1	ENSMUSG00000031872	1224.17	1345.57	1461.78	1430.75	1394.13	1703.45	1541.63	1476.07	1310.92	1347.11	935.08	1053.14	714.93	842.108	561.761	603.861	604.037	808.001	645.48	554.469	8	104170441	104219122	+	protein_coding	Bean1
ENSMUSG00000079523	11103.9	-0.934777	0.10156	-9.20419	3.44e-20	1.75e-18	6	72957346	72958748	-	protein_coding	Tmsb10	ENSMUSG00000079523	10944	13489.2	14390.5	14714.9	17380.1	17016.7	17736	15058.5	12939.4	12956.4	9158.54	10226.8	8035.21	8211.27	5985.72	6778.44	5718.4	6906.1	7814.72	6616.72	6	72957346	72958748	-	protein_coding	Tmsb10
ENSMUSG00000038400	5674.24	-0.934062	0.0881386	-10.5977	3.06e-26	3.37e-24	2	173224457	173276533	-	protein_coding	Pmepa1	ENSMUSG00000038400	7632.9	7509.52	6691.66	6671.02	8248.28	7697.09	7438.71	7664.29	7412.25	7838.25	5048.99	4598.02	4201.27	3876.75	2799.67	3078.61	3615.87	4551.36	3207.05	3703.22	2	173224457	173276533	-	protein_coding	Pmepa1
ENSMUSG00000079434	336.905	-0.933738	0.127934	-7.2986	2.91e-13	5.43e-12	1	87509888	87597845	+	protein_coding	Neu2	ENSMUSG00000079434	534.773	351.15	316.422	517.682	288.237	527.345	633.502	463.464	384.968	443.781	310.237	280.055	224.531	216.488	212.83	195.984	200.418	253.943	177.479	204.812	1	87509888	87597845	+	protein_coding	Neu2
ENSMUSG00000044894	8743.83	-0.933729	0.0941648	-9.9159	3.55e-23	2.72e-21	11	53427921	53430831	-	protein_coding	Uqcrq	ENSMUSG00000044894	9097.12	10466.3	10776.2	11644.6	12329.5	13136	14636.1	12400.1	10884.4	9965.92	7292.75	7314.44	6529.25	6746.4	5041.23	5011.69	4648.58	5677.94	6159.76	5118.46	11	53427921	53430831	-	protein_coding	Uqcrq
ENSMUSG00000037628	42.5359	-0.933648	0.146091	-6.39086	1.65e-10	2e-09	14	46760540	46771669	+	protein_coding	Cdkn3	ENSMUSG00000037628	64.9245	41.7309	66.8497	53.3313	65.8827	44.0446	70.7358	54.6691	49.852	52.9383	37.141	22.3618	30.0627	20.9812	24.6627	28.9275	38.9701	28.8572	31.6523	22.1418	14	46760540	46771669	+	protein_coding	Cdkn3
ENSMUSG00000087500	2.84084	-0.933508	0.326565	-2.85857	0.00425554	0.012322	4	47197486	47208459	-	lncRNA	Gm12426	ENSMUSG00000087500	12.814	3.05348	2.22832	3.67802	5.88238	2.38079	0	3.26383	3.69274	7.88443	4.36953	1.06485	0	0	1.82686	1.44637	0	2.30858	0	0.922577	4	47197486	47208459	-	lncRNA	Gm12426
ENSMUSG00000032091	26.7075	-0.933246	0.217544	-4.28992	1.79e-05	8.96e-05	9	45172725	45204092	-	protein_coding	Tmprss4	ENSMUSG00000032091	49.5476	15.2674	36.7673	17.4706	23.5295	64.2813	38.4886	46.5096	40.6201	30.4114	9.83144	13.843	16.9103	21.9349	18.2686	25.3116	21.3408	13.8515	12.4348	17.529	9	45172725	45204092	-	protein_coding	Tmprss4
ENSMUSG00000090589	46.207	-0.932082	0.159446	-5.84575	5.04e-09	4.82e-08	2	180099912	180101502	+	lncRNA	Gm17180	ENSMUSG00000090589	62.3617	65.1409	80.2196	56.0899	69.4121	63.0909	60.3335	53.0372	56.3143	49.5593	39.3258	28.7509	34.76	27.657	17.3552	39.0521	33.403	21.9315	49.7393	16.6064	2	180099912	180101502	+	lncRNA	Gm17180
ENSMUSG00000087636	55.0963	-0.931807	0.212815	-4.37849	1.2e-05	6.18e-05	16	60397919	60398322	-	processed_pseudogene	Gm4660	ENSMUSG00000087636	25.6281	43.7665	52.3656	93.7896	90.5887	91.6603	116.506	62.8287	111.705	57.4437	16.3857	28.7509	37.5784	52.453	49.3253	50.6231	33.403	27.7029	27.1305	32.2902	16	60397919	60398322	-	processed_pseudogene	Gm4660
ENSMUSG00000090200	19.1431	-0.930703	0.276057	-3.37142	0.000747828	0.00263453	10	83139149	83142038	-	lncRNA	1700025N21Rik	ENSMUSG00000090200	5.12562	9.16043	18.9407	41.3778	27.059	47.6158	55.1323	17.9511	28.6187	16.8952	7.64668	10.6485	13.1524	18.1201	1.82686	11.571	14.8458	15.0057	10.1739	11.9935	10	83139149	83142038	-	lncRNA	1700025N21Rik
ENSMUSG00000117548	30.1687	-0.930349	0.175745	-5.29375	1.2e-07	9.09e-07	18	6014253	6015021	-	TEC	Gm41662	ENSMUSG00000117548	27.3366	30.5348	43.4523	38.6193	58.8238	41.6638	39.5288	39.9819	34.1578	48.4329	21.8477	18.1024	18.7892	28.6107	17.3552	10.1246	16.7015	19.6229	29.3914	20.2967	18	6014253	6015021	-	TEC	Gm41662
ENSMUSG00000103603	8.11481	-0.930276	0.305827	-3.04184	0.0023514	0.00728336	1	37132272	37133264	-	lncRNA	Gm37020	ENSMUSG00000103603	15.3769	6.10696	15.5983	13.7926	16.4707	5.95197	12.4828	6.52766	16.6173	9.01078	2.18477	2.1297	9.39461	2.86107	9.13432	2.89275	13.9179	0	0	1.84515	1	37132272	37133264	-	lncRNA	Gm37020
ENSMUSG00000077567	9.29966	-0.929749	0.287068	-3.23878	0.00120043	0.00401526	15	53613066	53613198	-	snoRNA	Gm23200	ENSMUSG00000077567	3.41708	10.1783	17.8266	10.1146	24.706	7.14236	17.684	11.4234	14.771	13.5162	7.64668	9.58364	2.81838	0.95369	5.48059	0.723187	3.71144	8.08001	7.91307	8.30319	15	53613066	53613198	-	snoRNA	Gm23200
ENSMUSG00000032060	4352.96	-0.929391	0.118445	-7.84661	4.27e-15	1.09e-13	9	50751324	50756636	+	protein_coding	Cryab	ENSMUSG00000032060	4888.99	6299.33	5316.78	5518.87	7535.33	6586.45	6470.25	5600.73	4469.14	4842.17	3816.79	4469.17	3200.74	2702.76	2859.04	1857.15	2598.94	2665.25	2589.83	2771.42	9	50751324	50756636	+	protein_coding	Cryab
ENSMUSG00000099907	111.703	-0.929232	0.1672	-5.5576	2.74e-08	2.31e-07	12	117144529	117151651	-	lncRNA	Gm10421	ENSMUSG00000099907	105.929	139.442	153.754	168.27	157.648	155.942	134.19	152.584	199.408	123.898	69.9125	105.42	106.159	41.0087	54.8059	114.264	100.209	43.8629	52.0002	55.3546	12	117144529	117151651	-	lncRNA	Gm10421
ENSMUSG00000031901	698.314	-0.929021	0.0668014	-13.9072	5.73e-44	3.17e-41	8	105991336	106053840	+	protein_coding	Dus2	ENSMUSG00000031901	861.104	879.402	799.968	992.147	947.064	952.315	1039.19	953.038	874.256	879.677	500.311	526.035	560.858	482.567	454.889	435.359	521.457	489.418	375.306	441.914	8	105991336	106053840	+	protein_coding	Dus2
ENSMUSG00000094832	70.4025	-0.928916	0.181021	-5.13155	2.87e-07	2.03e-06	5	22775629	22778702	+	TEC	Gm21846	ENSMUSG00000094832	33.3165	92.6222	82.448	139.765	58.8238	107.135	137.311	93.0191	123.707	73.2126	43.6953	58.5667	54.4887	59.1288	40.191	43.3912	37.1144	45.0172	46.348	38.7482	5	22775629	22778702	+	TEC	Gm21846
ENSMUSG00000115959	11.8275	-0.92883	0.263483	-3.52519	0.000423172	0.00157253	2	75302071	75303225	-	processed_pseudogene	Gm18494	ENSMUSG00000115959	29.8994	12.2139	24.5116	11.0341	17.6472	13.0943	10.4023	13.8713	12.0014	19.1479	4.36953	13.843	2.81838	1.90738	4.56716	13.7406	5.56716	11.5429	7.91307	6.45804	2	75302071	75303225	-	processed_pseudogene	Gm18494
ENSMUSG00000035268	7681.07	-0.927801	0.0709842	-13.0705	4.85e-39	2e-36	2	163658385	163726158	+	protein_coding	Pkig	ENSMUSG00000035268	8261.64	9580.8	11540.5	10446.5	10369.5	10651.6	11133.6	10330	10228.9	8416.07	5919.62	6054.73	5615.16	5580.04	4898.74	5005.9	4592.91	5512.88	5158.19	4324.12	2	163658385	163726158	+	protein_coding	Pkig
ENSMUSG00000074121	22.5571	-0.927606	0.213229	-4.35027	1.36e-05	6.97e-05	7	45413694	45417179	+	protein_coding	Ntf5	ENSMUSG00000074121	20.5025	16.2852	33.4249	45.0558	34.1178	34.5214	26.0058	31.8223	31.3883	30.4114	24.0324	12.7782	17.8498	12.398	12.788	7.23187	18.5572	12.6972	23.7392	5.53546	7	45413694	45417179	+	protein_coding	Ntf5
ENSMUSG00000046922	613.595	-0.92748	0.234742	-3.95107	7.78e-05	0.000341718	10	41069976	41072285	-	protein_coding	Gpr6	ENSMUSG00000046922	270.804	994.416	601.647	811.924	1394.13	649.955	813.462	792.294	1335.85	693.83	287.297	652.752	682.988	270.848	265.809	431.743	559.499	300.115	257.74	204.812	10	41069976	41072285	-	protein_coding	Gpr6
ENSMUSG00000000402	80.3234	-0.926834	0.18276	-5.07133	3.95e-07	2.72e-06	X	166523006	166585720	-	protein_coding	Egfl6	ENSMUSG00000000402	63.216	87.533	100.275	143.443	141.177	116.659	105.064	133.817	97.8576	84.476	93.9449	42.5939	84.5515	47.6845	37.4507	40.4985	32.4751	71.5658	30.5218	51.6643	X	166523006	166585720	-	protein_coding	Egfl6
ENSMUSG00000035835	4261.17	-0.925362	0.0768448	-12.042	2.14e-33	5.23e-31	10	79860474	79874634	-	protein_coding	Plppr3	ENSMUSG00000035835	4658.33	5380.23	6161.31	5839.78	5655.32	5394.87	6232.03	6086.22	6076.4	4520.03	2749.53	2901.71	3674.23	2813.39	3160.47	3197.21	2703.78	3061.17	2621.49	2335.96	10	79860474	79874634	-	protein_coding	Plppr3
ENSMUSG00000021534	922.275	-0.924797	0.0951838	-9.71591	2.58e-22	1.77e-20	13	68597420	68614231	+	protein_coding	1700001L19Rik	ENSMUSG00000021534	1088.34	1208.16	1222.24	1229.38	1247.07	1409.43	1303.41	1291.66	1035.81	1103.82	729.712	724.097	564.616	653.278	474.985	734.035	474.136	599.075	836.524	515.72	13	68597420	68614231	+	protein_coding	1700001L19Rik
ENSMUSG00000103774	8.82318	-0.924592	0.311851	-2.96485	0.00302831	0.00909543	2	11181011	11181940	+	TEC	Gm36932	ENSMUSG00000103774	0	4.0713	17.8266	28.5047	10.5883	22.6175	18.7242	4.07979	14.771	7.88443	8.73906	5.32424	3.75784	6.67583	3.65373	2.89275	3.71144	1.15429	2.26088	9.22577	2	11181011	11181940	+	TEC	Gm36932
ENSMUSG00000090003	7.81941	-0.924351	0.290538	-3.18151	0.00146507	0.00478337	8	58523293	58524326	+	lncRNA	Gm15882	ENSMUSG00000090003	3.41708	4.0713	7.79913	16.5511	11.7648	26.1887	13.523	13.0553	5.53911	9.01078	4.36953	6.38909	5.63676	2.86107	4.56716	3.61594	5.56716	6.92573	0	5.53546	8	58523293	58524326	+	lncRNA	Gm15882
ENSMUSG00000086951	4.28978	-0.922924	0.320402	-2.88052	0.00397022	0.0115903	11	72266420	72268575	+	lncRNA	1700051A21Rik	ENSMUSG00000086951	7.68843	4.0713	4.45665	12.8731	8.23534	7.14236	10.4023	1.63191	6.46229	1.12635	0	2.1297	1.87892	4.76845	1.82686	0	4.6393	4.61715	0	1.84515	11	72266420	72268575	+	lncRNA	1700051A21Rik
ENSMUSG00000073234	8.27028	-0.922074	0.28238	-3.26536	0.00109324	0.0036974	5	5573798	5576203	+	protein_coding	Gm8773	ENSMUSG00000073234	13.6683	13.2317	8.91329	11.0341	16.4707	9.52315	8.32186	16.3191	10.155	9.01078	3.27715	10.6485	3.75784	8.58321	3.65373	8.67825	1.85572	0	0	8.30319	5	5573798	5576203	+	protein_coding	Gm8773
ENSMUSG00000085893	4.22872	-0.921879	0.324849	-2.83787	0.00454157	0.0130539	11	29601783	29602613	-	processed_pseudogene	Gm12091	ENSMUSG00000085893	6.83416	6.10696	2.22832	7.35605	4.70591	1.19039	13.523	8.15957	4.61592	10.1371	2.18477	2.1297	0	0	0	2.89275	9.2786	2.30858	0	0.922577	11	29601783	29602613	-	processed_pseudogene	Gm12091
ENSMUSG00000024330	3474.29	-0.921858	0.114074	-8.0812	6.41e-16	1.83e-14	17	34039436	34066685	+	protein_coding	Col11a2	ENSMUSG00000024330	3745.12	5002.61	4467.79	4724.42	4830.61	5318.68	4819.4	3743.61	4605.77	4547.06	2787.76	3559.79	3103.98	2674.15	1920.03	1814.48	2023.66	2098.5	1760.09	1938.33	17	34039436	34066685	+	protein_coding	Col11a2
ENSMUSG00000100980	149	-0.921371	0.109237	-8.43458	3.32e-17	1.13e-15	1	91798527	91802937	-	lncRNA	Gm29100	ENSMUSG00000100980	228.944	166.923	225.061	185.74	170.589	199.986	191.403	183.59	183.714	227.522	142.01	110.744	91.1277	91.5543	76.7283	131.62	96.4974	110.812	76.8698	88.5674	1	91798527	91802937	-	lncRNA	Gm29100
ENSMUSG00000003872	2875.26	-0.921214	0.0852012	-10.8122	3.01e-27	3.64e-25	7	45367890	45370583	-	protein_coding	Lin7b	ENSMUSG00000003872	3724.62	3326.26	3666.71	3764.46	4082.37	4196.14	4290.96	3768.09	3439.79	3517.58	2563.82	2175.49	1978.5	2394.72	1501.68	1935.97	1624.68	2104.27	1769.14	1680.01	7	45367890	45370583	-	protein_coding	Lin7b
ENSMUSG00000062038	342.936	-0.920481	0.0994709	-9.25378	2.17e-20	1.14e-18	5	13121447	13121766	-	processed_pseudogene	Gm10108	ENSMUSG00000062038	427.989	420.362	395.527	485.499	483.532	557.104	486.829	452.04	396.046	404.359	246.878	321.584	271.504	251.774	233.839	183.69	186.5	233.166	249.827	170.677	5	13121447	13121766	-	processed_pseudogene	Gm10108
ENSMUSG00000028339	412.434	-0.920384	0.118086	-7.79415	6.48e-15	1.61e-13	4	47208160	47313167	+	protein_coding	Col15a1	ENSMUSG00000028339	703.918	577.107	621.702	471.707	456.473	497.585	437.938	509.157	623.15	536.141	386.703	312.001	303.446	301.366	298.692	159.824	230.109	322.046	238.522	261.089	4	47208160	47313167	+	protein_coding	Col15a1
ENSMUSG00000072770	308.787	-0.920362	0.117495	-7.83321	4.76e-15	1.21e-13	6	125049688	125063267	+	protein_coding	Acrbp	ENSMUSG00000072770	334.019	511.966	543.711	346.654	296.472	442.827	425.455	390.843	418.203	360.431	220.661	319.455	197.287	209.812	155.283	189.475	240.316	198.537	194.435	179.902	6	125049688	125063267	+	protein_coding	Acrbp
ENSMUSG00000032899	9.21588	-0.920043	0.274191	-3.35548	0.000792263	0.0027668	6	131299141	131353597	-	protein_coding	Styk1	ENSMUSG00000032899	3.41708	22.3922	8.91329	16.5511	14.1177	7.14236	13.523	13.0553	15.6941	13.5162	2.18477	8.51879	12.213	1.90738	7.30746	5.06231	3.71144	4.61715	6.78263	3.69031	6	131299141	131353597	-	protein_coding	Styk1
ENSMUSG00000059040	8111.83	-0.918767	0.23822	-3.8568	0.000114882	0.000486282	18	48045334	48048412	+	protein_coding	Eno1b	ENSMUSG00000059040	4585.72	3927.79	15451.2	9737.57	10113	15185.9	16797.7	15107.4	14896.5	4613.52	4267.94	3993.18	3569.01	7643.83	3281.05	7015.64	2866.16	7029.61	8568.72	3585.13	18	48045334	48048412	+	protein_coding	Eno1b
ENSMUSG00000062704	24.1709	-0.918628	0.200404	-4.58388	4.56e-06	2.57e-05	8	88174559	88175034	+	lncRNA	9430002A10Rik	ENSMUSG00000062704	29.8994	20.3565	43.4523	31.2632	34.1178	46.4254	31.207	29.3745	36.9274	20.2742	24.0324	24.4915	15.0314	16.2127	6.39402	8.67825	18.5572	15.0057	16.9566	14.7612	8	88174559	88175034	+	lncRNA	9430002A10Rik
ENSMUSG00000001467	4477.14	-0.91776	0.107434	-8.54253	1.31e-17	4.74e-16	5	4081144	4104746	-	protein_coding	Cyp51	ENSMUSG00000001467	6383.96	6308.49	5863.83	5622.78	6955.33	5696.04	5591.25	5631.74	4825.49	6037.22	4178.36	4734.32	3116.19	2804.8	2355.74	2670.01	2503.37	3051.94	2480.18	2731.75	5	4081144	4104746	-	protein_coding	Cyp51
ENSMUSG00000028927	1910.55	-0.917688	0.146139	-6.27956	3.4e-10	3.89e-09	4	140906343	140952586	+	protein_coding	Padi2	ENSMUSG00000028927	2209.14	2715.56	2370.94	2124.98	2989.43	2612.91	2749.34	2257.75	3040.97	2217.78	1709.58	2307.53	1741.76	979.44	1232.22	718.848	1194.16	1040.01	1066	932.725	4	140906343	140952586	+	protein_coding	Padi2
ENSMUSG00000036040	790.468	-0.916747	0.0780265	-11.7492	7.13e-32	1.47e-29	2	27079378	27108981	+	protein_coding	Adamtsl2	ENSMUSG00000036040	1156.68	935.382	1006.09	1025.25	1047.06	1143.97	1130.73	1015.87	887.181	1017.09	696.94	658.076	571.192	582.705	474.985	468.625	522.385	507.887	506.436	454.83	2	27079378	27108981	+	protein_coding	Adamtsl2
ENSMUSG00000060771	926.413	-0.916724	0.0923338	-9.92836	3.13e-23	2.42e-21	1	37754775	37866429	-	protein_coding	Tsga10	ENSMUSG00000060771	1301.91	1359.82	1169.87	1199.04	1209.42	1264.2	1073.52	1290.03	1093.05	1205.19	675.093	946.65	779.752	570.307	569.068	544.56	626.305	584.07	496.262	570.152	1	37754775	37866429	-	protein_coding	Tsga10
ENSMUSG00000038227	1.61843	-0.916715	0.284894	-3.21774	0.00129206	0.00428186	6	52223099	52231089	-	protein_coding	Hoxa9	ENSMUSG00000038227	1.70854	0	0	0	9.41182	5.95197	9.3621	1.63191	0.923185	3.37904	0	0	0	0	0	0	0	0	0	0	6	52223099	52231089	-	protein_coding	Hoxa9
ENSMUSG00000049561	1.34444	-0.916448	0.312766	-2.93014	0.00338811	0.010065	17	37207949	37213118	-	protein_coding	Olfr95	ENSMUSG00000049561	1.70854	0	2.22832	1.83901	0	4.76158	4.16093	3.26383	3.69274	2.25269	0	0	0	0	1.82686	0	0	1.15429	0	0	17	37207949	37213118	-	protein_coding	Olfr95
ENSMUSG00000051067	3302.37	-0.916245	0.084474	-10.8465	2.07e-27	2.59e-25	10	80832800	80844039	-	protein_coding	Lingo3	ENSMUSG00000051067	4387.53	4661.64	3817.12	3776.41	4604.73	3627.13	4248.31	4576.7	5203.99	4427.67	2331.14	2822.91	2652.1	1847.3	1860.66	2153.65	2120.16	2647.94	2355.83	1924.5	10	80832800	80844039	-	protein_coding	Lingo3
ENSMUSG00000032502	72.6322	-0.916087	0.217595	-4.21005	2.55e-05	0.00012448	9	111561436	111690348	-	protein_coding	Stac	ENSMUSG00000032502	38.4421	150.638	111.416	102.985	96.4711	58.3293	105.064	109.338	149.556	58.5701	34.9562	19.1673	88.3093	43.8698	48.4119	67.2564	62.1666	25.3943	36.174	46.1288	9	111561436	111690348	-	protein_coding	Stac
ENSMUSG00000079559	54.3314	-0.915982	0.166695	-5.49494	3.91e-08	3.2e-07	9	51270257	51278569	-	protein_coding	Colca2	ENSMUSG00000079559	85.427	50.8913	86.9046	55.1704	69.4121	70.2332	86.3393	74.2521	71.0852	70.9599	30.5867	57.5018	42.2757	37.1939	18.2686	34.713	38.9701	35.7829	53.1306	17.529	9	51270257	51278569	-	protein_coding	Colca2
ENSMUSG00000086891	6.42909	-0.915829	0.312063	-2.93476	0.00333806	0.00992858	10	93726725	93728207	-	lncRNA	Gm15963	ENSMUSG00000086891	2.56281	12.2139	7.79913	16.5511	14.1177	14.2847	2.08047	11.4234	6.46229	5.63174	3.27715	6.38909	2.81838	1.90738	0	0	3.71144	4.61715	9.04351	3.69031	10	93726725	93728207	-	lncRNA	Gm15963
ENSMUSG00000030043	387.569	-0.915165	0.206837	-4.42457	9.66e-06	5.09e-05	6	82402333	82560104	+	protein_coding	Tacr1	ENSMUSG00000030043	203.316	679.908	385.5	496.533	634.121	372.593	534.68	616.048	854.869	429.138	154.026	172.505	444.365	221.256	277.683	356.531	318.256	205.463	219.305	175.29	6	82402333	82560104	+	protein_coding	Tacr1
ENSMUSG00000072884	14.6483	-0.914619	0.215851	-4.23726	2.26e-05	0.000111392	12	100187967	100193540	+	lncRNA	Gm10433	ENSMUSG00000072884	24.7738	16.2852	16.7124	19.3096	18.8236	14.2847	18.7242	17.9511	32.3115	16.8952	15.2934	8.51879	14.0919	10.4906	6.39402	6.50869	7.42288	11.5429	10.1739	6.45804	12	100187967	100193540	+	lncRNA	Gm10433
ENSMUSG00000025196	23.3158	-0.913809	0.224108	-4.07753	4.55e-05	0.000209852	19	43956306	43986556	-	protein_coding	Cpn1	ENSMUSG00000025196	17.0854	44.7843	25.6257	20.2291	61.1768	19.0463	24.9656	42.4298	25.8492	33.7904	10.9238	9.58364	21.6076	15.259	13.7015	11.571	20.4129	19.6229	20.3479	8.30319	19	43956306	43986556	-	protein_coding	Cpn1
ENSMUSG00000035852	29.229	-0.913367	0.214247	-4.26315	2.02e-05	0.000100092	10	79820988	79830490	+	protein_coding	Misp	ENSMUSG00000035852	30.7537	67.1765	38.9957	26.6657	50.5885	33.331	35.3679	36.7181	36.9274	38.2958	7.64668	30.8806	7.51568	16.2127	17.3552	36.1594	16.7015	15.0057	19.2175	23.0644	10	79820988	79830490	+	protein_coding	Misp
ENSMUSG00000007805	27.7022	-0.913147	0.208433	-4.38101	1.18e-05	6.11e-05	1	91801460	91848028	+	protein_coding	Twist2	ENSMUSG00000007805	39.2964	24.4278	47.909	45.9753	28.2354	57.1389	50.9714	21.2149	24.0028	32.6641	16.3857	12.7782	16.9103	26.7033	25.5761	8.67825	16.7015	26.5486	18.087	13.8387	1	91801460	91848028	+	protein_coding	Twist2
ENSMUSG00000024365	1.64372	-0.91255	0.325038	-2.80752	0.00499248	0.0141977	17	34801347	34804561	-	protein_coding	Cyp21a1	ENSMUSG00000024365	1.70854	2.03565	2.22832	3.67802	2.35295	2.38079	4.16093	3.26383	3.69274	1.12635	0	2.1297	0	0	0	0	1.85572	0	2.26088	0	17	34801347	34804561	-	protein_coding	Cyp21a1
ENSMUSG00000001366	5026.74	-0.912475	0.118556	-7.69654	1.4e-14	3.3e-13	9	78081498	78109065	-	protein_coding	Fbxo9	ENSMUSG00000001366	7198.93	6541.57	6585.81	6779.52	6604.74	6191.24	5906.44	6342.43	6422.6	7584.82	5369.06	4799.27	4045.32	3449.5	2481.79	2386.52	2733.48	3392.45	2996.79	2722.52	9	78081498	78109065	-	protein_coding	Fbxo9
ENSMUSG00000075012	10499.1	-0.912315	0.0660856	-13.8051	2.38e-43	1.21e-40	2	102449365	102452499	-	protein_coding	Fjx1	ENSMUSG00000075012	15852.7	13005.8	14210	13700.6	14290.7	13700.2	13369.1	12341.4	13088	13880	8397.15	7118.51	8263.5	7280.47	6490.85	7873.34	6938.54	7980.75	5671.41	6528.15	2	102449365	102452499	-	protein_coding	Fjx1
ENSMUSG00000107804	24.4407	-0.912141	0.308829	-2.95355	0.00314144	0.00939427	6	103526251	103529843	+	TEC	Gm44439	ENSMUSG00000107804	20.5025	56.9983	42.3381	2.75852	1.17648	32.1406	41.6093	57.117	65.5461	32.6641	13.1086	37.2697	17.8498	3.81476	3.65373	7.23187	18.5572	18.4686	6.78263	9.22577	6	103526251	103529843	+	TEC	Gm44439
ENSMUSG00000069855	6.74338	-0.910815	0.282577	-3.22325	0.00126745	0.0042119	11	61301630	61342860	-	protein_coding	Slc47a2	ENSMUSG00000069855	8.5427	5.08913	10.0275	9.19506	16.4707	9.52315	9.3621	7.34361	7.38548	11.2635	8.73906	10.6485	3.75784	3.81476	1.82686	2.89275	1.85572	2.30858	1.13044	3.69031	11	61301630	61342860	-	protein_coding	Slc47a2
ENSMUSG00000039997	36.0734	-0.91072	0.221291	-4.11549	3.86e-05	0.000181244	1	173920406	173942672	-	protein_coding	Ifi203	ENSMUSG00000039997	27.3366	63.1052	57.9364	67.1239	27.059	38.0926	67.6151	35.9021	76.6243	24.7796	38.2334	38.3345	21.6076	24.7959	29.2298	13.0174	13.9179	13.8515	22.6088	20.2967	1	173920406	173942672	-	protein_coding	Ifi203
ENSMUSG00000076492	2.55139	-0.910488	0.32656	-2.78812	0.0053015	0.014988	6	41542753	41542803	+	TR_J_gene	Trbj2-1	ENSMUSG00000076492	4.27135	7.12478	2.22832	3.67802	9.41182	0	0	1.63191	2.76955	9.01078	1.09238	2.1297	0	1.90738	0.913432	0.723187	0.92786	1.15429	1.13044	0.922577	6	41542753	41542803	+	TR_J_gene	Trbj2-1
ENSMUSG00000000560	7867.88	-0.910067	0.157262	-5.78693	7.17e-09	6.66e-08	5	70957596	71095849	-	protein_coding	Gabra2	ENSMUSG00000000560	5656.97	10737	11872.5	12724.1	11454.2	13577.6	12159.3	11292.8	7923.7	6778.36	4924.46	5544.67	7923.41	6781.69	3628.15	3339.68	6817.91	3642.93	4122.71	6455.27	5	70957596	71095849	-	protein_coding	Gabra2
ENSMUSG00000093651	331.492	-0.910002	0.0979882	-9.28685	1.59e-20	8.54e-19	6	6735426	6736492	-	processed_pseudogene	Gm5873	ENSMUSG00000093651	445.075	443.772	438.98	376.997	592.944	385.688	430.656	370.445	382.199	482.077	288.389	298.158	248.957	191.692	200.955	203.216	222.686	202	223.827	201.122	6	6735426	6736492	-	processed_pseudogene	Gm5873
ENSMUSG00000029298	199.086	-0.909726	0.147359	-6.17355	6.68e-10	7.34e-09	5	105077629	105139539	-	protein_coding	Gbp9	ENSMUSG00000029298	250.301	189.316	436.751	227.118	225.884	282.123	339.116	247.235	264.954	168.952	144.195	97.9661	160.648	152.59	151.63	110.648	123.405	131.589	88.1742	189.128	5	105077629	105139539	-	protein_coding	Gbp9
ENSMUSG00000052730	2.05905	-0.909498	0.311319	-2.92143	0.00348426	0.0103209	6	48589444	48590584	+	lncRNA	Gm5111	ENSMUSG00000052730	4.27135	2.03565	4.45665	9.19506	7.05886	0	0	0	1.84637	7.88443	0	0	0	0	0	1.44637	1.85572	0	1.13044	0	6	48589444	48590584	+	lncRNA	Gm5111
ENSMUSG00000064851	6.72571	-0.909191	0.311527	-2.9185	0.00351724	0.0104083	5	7177705	7177856	-	snRNA	Gm24525	ENSMUSG00000064851	3.41708	4.0713	6.68497	12.8731	4.70591	21.4271	19.7644	11.4234	8.30866	4.50539	3.27715	9.58364	2.81838	0.95369	1.82686	0	3.71144	8.08001	3.39132	3.69031	5	7177705	7177856	-	snRNA	Gm24525
ENSMUSG00000105156	13.0706	-0.908842	0.251586	-3.61246	0.000303311	0.00116642	5	22563956	22564252	+	processed_pseudogene	Gm9057	ENSMUSG00000105156	12.814	18.3209	18.9407	24.8267	18.8236	20.2367	18.7242	19.583	17.5405	9.01078	8.73906	10.6485	13.1524	16.2127	10.0478	8.67825	3.71144	4.61715	6.78263	0	5	22563956	22564252	+	processed_pseudogene	Gm9057
ENSMUSG00000064023	72.7039	-0.908833	0.155422	-5.84751	4.99e-09	4.77e-08	7	43797576	43803826	+	protein_coding	Klk8	ENSMUSG00000064023	109.347	88.5509	104.731	90.1116	83.5299	104.755	131.069	82.4117	86.7794	79.9707	65.543	80.9285	43.2152	34.3328	35.6238	52.0695	42.6816	25.3943	67.8263	45.2063	7	43797576	43803826	+	protein_coding	Klk8
ENSMUSG00000019312	117.655	-0.908798	0.146015	-6.22403	4.85e-10	5.45e-09	11	98446393	98455373	+	protein_coding	Grb7	ENSMUSG00000019312	114.472	140.46	142.613	161.833	180.001	171.417	195.564	119.13	177.252	152.057	51.342	101.161	130.585	72.4805	84.9492	62.9173	99.281	81.9544	61.0437	52.5869	11	98446393	98455373	+	protein_coding	Grb7
ENSMUSG00000103476	6.49486	-0.908073	0.32527	-2.79175	0.00524235	0.0148422	3	63481111	63483879	-	protein_coding	Strit1	ENSMUSG00000103476	1.70854	8.14261	0	6.43654	40.0002	21.4271	4.16093	3.26383	12.9246	6.75808	2.18477	8.51879	3.75784	0	0	0	3.71144	5.77144	1.13044	0	3	63481111	63483879	-	protein_coding	Strit1
ENSMUSG00000020441	1179.39	-0.908046	0.101963	-8.90564	5.31e-19	2.26e-17	11	59208320	59210738	+	protein_coding	2310033P09Rik	ENSMUSG00000020441	1246.38	1491.12	1616.65	1766.37	1570.6	1937.96	1859.94	1325.93	1365.39	1293.05	946.003	964.753	1050.32	893.608	673.199	620.495	786.825	777.99	671.48	729.758	11	59208320	59210738	+	protein_coding	2310033P09Rik
ENSMUSG00000001494	8.14166	-0.907772	0.281894	-3.22026	0.00128073	0.00425102	11	101962457	101967015	-	protein_coding	Sost	ENSMUSG00000001494	6.83416	14.2496	13.3699	16.5511	21.1766	2.38079	12.4828	13.0553	6.46229	6.75808	6.5543	10.6485	3.75784	1.90738	1.82686	4.33912	6.49502	5.77144	4.52175	3.69031	11	101962457	101967015	-	protein_coding	Sost
ENSMUSG00000032532	25636.1	-0.906415	0.109122	-8.30643	9.86e-17	3.14e-15	9	121489823	121495694	-	protein_coding	Cck	ENSMUSG00000032532	34515.9	31329.7	35704.4	36908	34970.8	36428.4	39689	32344.5	23770.2	30838.3	23623.9	21601.5	13483.1	20352.7	14121.7	15294	12503.8	21072.7	18643.2	15527	9	121489823	121495694	-	protein_coding	Cck
ENSMUSG00000034224	20.4146	-0.906378	0.247321	-3.66478	0.000247552	0.000970896	8	119479601	119501698	-	protein_coding	Slc38a8	ENSMUSG00000034224	24.7738	41.7309	18.9407	16.5511	21.1766	19.0463	8.32186	40.7979	54.4679	31.5377	22.94	8.51879	15.9708	17.1664	10.9612	10.1246	11.1343	16.16	12.4348	5.53546	8	119479601	119501698	-	protein_coding	Slc38a8
ENSMUSG00000015806	3445.48	-0.905859	0.100078	-9.05148	1.41e-19	6.6e-18	5	45434020	45450236	-	protein_coding	Qdpr	ENSMUSG00000015806	3477.73	4218.89	4633.8	4743.73	5641.21	5212.74	5122.11	4528.56	3957.69	3633.6	2973.47	3186.03	2629.55	2132.45	2043.35	1911.38	2168.41	2018.85	2425.92	2250.16	5	45434020	45450236	-	protein_coding	Qdpr
ENSMUSG00000038742	459.175	-0.905618	0.123465	-7.33499	2.22e-13	4.22e-12	9	20873807	20879727	-	protein_coding	Angptl6	ENSMUSG00000038742	485.225	575.072	625.045	560.899	698.827	729.712	652.226	628.287	583.453	496.719	376.872	495.155	354.177	352.865	229.271	217.679	282.997	296.652	325.566	216.806	9	20873807	20879727	-	protein_coding	Angptl6
ENSMUSG00000084168	16.4928	-0.9056	0.233129	-3.88455	0.000102519	0.000438514	11	97768059	97768371	+	processed_pseudogene	Atp5l2-ps	ENSMUSG00000084168	10.2512	22.3922	15.5983	22.0681	22.3531	32.1406	29.1265	13.8713	35.081	20.2742	18.5705	10.6485	16.9103	7.62952	7.30746	10.1246	8.35074	6.92573	14.6957	5.53546	11	97768059	97768371	+	processed_pseudogene	Atp5l2-ps
ENSMUSG00000022097	43.0703	-0.905516	0.178259	-5.07978	3.78e-07	2.61e-06	14	70520948	70524081	-	protein_coding	Sftpc	ENSMUSG00000022097	58.0903	43.7665	69.078	60.6874	62.3533	32.1406	67.6151	85.6755	37.8506	55.191	34.9562	21.297	14.0919	25.7496	33.797	42.6681	25.0522	27.7029	35.0436	28.5999	14	70520948	70524081	-	protein_coding	Sftpc
ENSMUSG00000094392	1076.24	-0.904424	0.110338	-8.19683	2.47e-16	7.47e-15	3	86672032	86672168	-	processed_pseudogene	Gm3788	ENSMUSG00000094392	1056.73	1303.84	1448.41	1356.27	1760.01	1680.84	1757.99	1378.15	1147.52	1231.1	874.999	1028.64	829.544	781.072	550.799	600.969	620.738	745.67	740.437	631.043	3	86672032	86672168	-	processed_pseudogene	Gm3788
ENSMUSG00000030507	1.25863	-0.904303	0.304202	-2.9727	0.00295191	0.00889209	7	49631498	49636849	-	protein_coding	Dbx1	ENSMUSG00000030507	3.41708	0	2.22832	1.83901	4.70591	4.76158	1.04023	1.63191	3.69274	0	0	0	0	0	0	0	1.85572	0	0	0	7	49631498	49636849	-	protein_coding	Dbx1
ENSMUSG00000024672	19.0833	-0.903095	0.224675	-4.01957	5.83e-05	0.00026278	19	11321038	11336146	-	protein_coding	Ms4a7	ENSMUSG00000024672	30.7537	14.2496	28.9682	36.7802	36.4708	26.1887	22.8851	13.8713	31.3883	15.7689	12.0162	19.1673	6.57622	12.398	10.9612	14.4637	5.56716	13.8515	9.04351	20.2967	19	11321038	11336146	-	protein_coding	Ms4a7
ENSMUSG00000044689	33.0562	-0.902642	0.190715	-4.73293	2.21e-06	1.32e-05	1	63964726	63968999	+	lncRNA	Gm13749	ENSMUSG00000044689	55.5275	49.8735	38.9957	35.8607	43.5296	40.4734	26.0058	43.2457	38.7738	67.5808	38.2334	24.4915	23.4865	18.1201	6.39402	25.3116	19.4851	20.7772	23.7392	21.2193	1	63964726	63968999	+	lncRNA	Gm13749
ENSMUSG00000112311	7.9952	-0.902426	0.30058	-3.00229	0.00267961	0.00816806	10	81887012	81887964	+	processed_pseudogene	Gm8153	ENSMUSG00000112311	20.5025	1.01783	16.7124	2.75852	5.88238	19.0463	18.7242	8.15957	11.0782	10.1371	3.27715	1.06485	4.6973	6.67583	1.82686	5.06231	8.35074	6.92573	3.39132	4.61288	10	81887012	81887964	+	processed_pseudogene	Gm8153
ENSMUSG00000032338	663.811	-0.901617	0.145646	-6.19046	6e-10	6.65e-09	9	58823411	58863175	+	protein_coding	Hcn4	ENSMUSG00000032338	807.285	863.116	992.718	749.397	1005.89	632.099	772.893	932.639	1202.91	794.075	403.089	284.315	834.241	417.716	347.104	631.343	450.012	393.612	414.871	346.889	9	58823411	58863175	+	protein_coding	Hcn4
ENSMUSG00000078650	3.58342	-0.901434	0.32134	-2.80524	0.00502795	0.0142852	11	101367560	101377903	+	protein_coding	G6pc	ENSMUSG00000078650	5.12562	6.10696	6.68497	5.51704	8.23534	2.38079	2.08047	8.15957	7.38548	2.25269	0	2.1297	0	3.81476	0	5.7855	1.85572	2.30858	0	1.84515	11	101367560	101377903	+	protein_coding	G6pc
ENSMUSG00000105891	14.5554	-0.901267	0.249248	-3.61594	0.000299258	0.0011532	3	102262404	102445132	+	lncRNA	A230001M10Rik	ENSMUSG00000105891	17.0854	26.4635	30.0824	16.5511	32.9414	14.2847	13.523	13.0553	16.6173	18.0216	15.2934	12.7782	14.0919	5.72214	9.13432	3.61594	10.2065	4.61715	2.26088	14.7612	3	102262404	102445132	+	lncRNA	A230001M10Rik
ENSMUSG00000034898	1086.58	-0.901264	0.188313	-4.786	1.7e-06	1.04e-05	9	79805093	80012851	-	protein_coding	Filip1	ENSMUSG00000034898	908.089	1332.33	1480.72	1603.62	1505.89	1093.97	1562.43	1598.46	2379.05	997.944	476.279	523.906	1352.82	677.12	846.751	1045.01	731.154	534.435	603.654	477.895	9	79805093	80012851	-	protein_coding	Filip1
ENSMUSG00000058186	2.89738	-0.901263	0.320254	-2.81421	0.00488966	0.0139404	4	145670684	145704441	+	protein_coding	Zfp980	ENSMUSG00000058186	0	0	2.22832	4.59753	4.70591	15.4751	6.2414	9.79149	3.69274	2.25269	0	0	0	1.90738	0	3.61594	0	2.30858	1.13044	0	4	145670684	145704441	+	protein_coding	Zfp980
ENSMUSG00000062365	5.15808	-0.901074	0.31407	-2.86903	0.00411737	0.0119743	6	127233761	127234619	+	processed_pseudogene	Gm4968	ENSMUSG00000062365	6.83416	3.05348	8.91329	9.19506	3.52943	9.52315	18.7242	10.6074	1.84637	3.37904	2.18477	2.1297	0	4.76845	2.7403	5.7855	4.6393	3.46286	0	1.84515	6	127233761	127234619	+	processed_pseudogene	Gm4968
ENSMUSG00000100789	22.288	-0.900703	0.218636	-4.11964	3.79e-05	0.000178415	12	103312366	103314769	-	lncRNA	Gm29508	ENSMUSG00000100789	23.9196	30.5348	40.1098	34.9412	36.4708	35.7118	35.3679	19.583	26.7724	16.8952	8.73906	24.4915	19.7287	11.4443	20.0955	13.0174	24.1244	9.2343	9.04351	5.53546	12	103312366	103314769	-	lncRNA	Gm29508
ENSMUSG00000109648	114.608	-0.900577	0.253454	-3.55322	0.00038055	0.00143069	8	29108836	29112776	-	TEC	Svet1	ENSMUSG00000109648	29.0452	63.1052	116.987	181.143	96.4711	241.65	315.191	186.038	201.254	134.035	61.1734	89.4473	38.5179	91.5543	107.785	66.5332	64.0223	69.2573	63.3045	75.6513	8	29108836	29112776	-	TEC	Svet1
ENSMUSG00000116056	132.457	-0.900502	0.204959	-4.39357	1.12e-05	5.8e-05	15	102657110	102660468	+	lncRNA	Gm4544	ENSMUSG00000116056	82.0099	229.011	274.084	231.716	102.353	257.125	167.477	149.32	74.778	202.742	148.564	120.328	71.399	95.369	69.4208	48.4536	91.8581	79.6459	97.2177	56.2772	15	102657110	102660468	+	lncRNA	Gm4544
ENSMUSG00000033061	1289.77	-0.900387	0.113909	-7.90447	2.69e-15	6.97e-14	1	75272198	75278415	-	protein_coding	Resp18	ENSMUSG00000033061	1338.64	1438.19	1556.48	1446.38	1827.07	1710.6	1901.55	2480.51	1885.14	1329.09	929.618	850.814	854.909	790.609	1239.53	897.476	646.718	848.401	1087.48	736.216	1	75272198	75278415	-	protein_coding	Resp18
ENSMUSG00000084088	28.4365	-0.900032	0.226924	-3.96623	7.3e-05	0.000322597	4	127046382	127046602	+	processed_pseudogene	Gm12941	ENSMUSG00000084088	61.5074	61.0696	41.224	15.6316	28.2354	30.9502	17.684	44.0617	41.5433	40.5485	19.6629	42.5939	15.0314	13.3517	17.3552	16.6333	15.7736	18.4686	13.5653	13.8387	4	127046382	127046602	+	processed_pseudogene	Gm12941
ENSMUSG00000078941	385.551	-0.899726	0.142112	-6.33111	2.43e-10	2.86e-09	13	100650978	100666359	+	protein_coding	Ak6	ENSMUSG00000078941	521.959	460.057	555.967	537.911	510.591	540.439	588.772	585.041	404.355	369.442	404.182	437.653	266.807	217.441	153.457	183.69	233.821	260.869	229.479	249.096	13	100650978	100666359	+	protein_coding	Ak6
ENSMUSG00000028610	229.457	-0.899637	0.168161	-5.34986	8.8e-08	6.85e-07	4	107676289	107684230	-	protein_coding	Dmrtb1	ENSMUSG00000028610	265.678	309.419	358.76	214.245	289.413	451.159	366.162	314.959	155.095	311.998	160.58	185.284	224.531	226.025	130.621	76.6579	124.333	128.126	185.392	110.709	4	107676289	107684230	-	protein_coding	Dmrtb1
ENSMUSG00000042269	41.3363	-0.899183	0.151254	-5.94487	2.77e-09	2.76e-08	8	120166396	120177466	-	protein_coding	Fam92b	ENSMUSG00000042269	58.9446	68.1943	63.5072	53.3313	56.4709	47.6158	57.2128	57.117	38.7738	42.8012	22.94	28.7509	33.8206	30.5181	15.5283	21.6956	25.0522	31.1658	37.3045	35.9805	8	120166396	120177466	-	protein_coding	Fam92b
ENSMUSG00000110216	7.4441	-0.89861	0.279453	-3.2156	0.00130173	0.00431139	8	91710232	91714413	-	lncRNA	Gm36325	ENSMUSG00000110216	9.39697	6.10696	14.4841	9.19506	7.05886	7.14236	10.4023	17.9511	10.155	11.2635	2.18477	4.25939	1.87892	12.398	1.82686	4.33912	1.85572	6.92573	4.52175	5.53546	8	91710232	91714413	-	lncRNA	Gm36325
ENSMUSG00000094815	2.72068	-0.897955	0.318876	-2.816	0.00486252	0.0138759	13	62543433	62543503	-	snoRNA	Gm22615	ENSMUSG00000094815	1.70854	0	1.11416	6.43654	1.17648	10.7135	14.5633	3.26383	3.69274	3.37904	0	4.25939	0	0	0	0	0	0	2.26088	1.84515	13	62543433	62543503	-	snoRNA	Gm22615
ENSMUSG00000031851	1248.68	-0.89791	0.0823963	-10.8975	1.19e-27	1.52e-25	8	125729962	125748235	+	protein_coding	Ntpcr	ENSMUSG00000031851	1489.85	1330.3	1616.65	1672.58	1796.48	1890.35	1845.37	1695.56	1458.63	1512.68	893.569	1195.82	869.001	933.663	746.274	777.426	811.877	775.681	889.655	772.197	8	125729962	125748235	+	protein_coding	Ntpcr
ENSMUSG00000002980	996.025	-0.897908	0.0990867	-9.06184	1.28e-19	6.05e-18	7	19756130	19771016	-	protein_coding	Bcam	ENSMUSG00000002980	1161.81	1111.47	1419.44	1336.96	1212.95	1364.19	1601.96	1263.92	1412.47	1143.24	823.657	789.053	787.268	808.729	524.31	596.63	518.674	632.55	851.22	560.004	7	19756130	19771016	-	protein_coding	Bcam
ENSMUSG00000020846	1115.03	-0.896781	0.0613246	-14.6235	1.99e-48	1.6e-45	11	76019193	76027782	-	protein_coding	Rflnb	ENSMUSG00000020846	1506.08	1319.1	1555.37	1585.23	1311.77	1555.84	1566.59	1361.02	1346.93	1425.96	793.07	838.036	794.784	721.943	674.113	819.371	779.402	884.184	815.046	646.726	11	76019193	76027782	-	protein_coding	Rflnb
ENSMUSG00000037577	16.2254	-0.894874	0.254752	-3.51272	0.000443537	0.00164224	17	32183769	32189549	-	protein_coding	Ephx3	ENSMUSG00000037577	18.7939	7.12478	27.854	22.0681	18.8236	21.4271	35.3679	21.2149	22.1564	27.0323	4.36953	15.9727	5.63676	12.398	3.65373	13.0174	20.4129	13.8515	2.26088	11.0709	17	32183769	32189549	-	protein_coding	Ephx3
ENSMUSG00000058258	541.109	-0.894168	0.13703	-6.52534	6.78e-11	8.81e-10	13	8885500	8892451	+	protein_coding	Idi1	ENSMUSG00000058258	811.556	719.603	678.524	793.534	882.358	620.195	576.289	550.771	620.38	856.024	470.817	629.326	462.215	331.884	235.665	344.237	351.659	318.583	262.262	306.295	13	8885500	8892451	+	protein_coding	Idi1
ENSMUSG00000046341	17008.5	-0.893822	0.0946965	-9.43881	3.77e-21	2.24e-19	4	69925629	69926079	-	processed_pseudogene	Gm11223	ENSMUSG00000046341	22502.3	21613.5	22068.2	24643.7	24136.6	22536.5	23762	20491.9	17283.9	23158.8	16839.1	14919.6	12438.5	11798.1	9838.58	10537.6	8900.96	11488.6	10952.8	10258.1	4	69925629	69926079	-	processed_pseudogene	Gm11223
ENSMUSG00000062319	67.2146	-0.893668	0.225738	-3.95888	7.53e-05	0.000331505	2	6950452	6951680	-	lncRNA	Gm10115	ENSMUSG00000062319	23.0653	66.1587	60.1647	107.582	68.2357	173.798	158.115	97.0989	86.7794	63.0754	56.8039	75.6042	32.8811	24.7959	29.2298	49.1767	51.0323	36.9372	44.0871	39.6708	2	6950452	6951680	-	lncRNA	Gm10115
ENSMUSG00000055839	5133.68	-0.893575	0.0793229	-11.265	1.95e-29	3.08e-27	17	23824737	23829136	-	protein_coding	Elob	ENSMUSG00000055839	5079.49	5932.91	6627.03	7274.21	7343.57	7651.85	8296.9	6991.12	6338.59	5428.99	3647.47	3972.95	3854.61	3953.05	3412.58	3265.91	3135.24	3566.75	3650.19	3250.24	17	23824737	23829136	-	protein_coding	Elob
ENSMUSG00000064264	2013.97	-0.893192	0.081156	-11.0059	3.58e-28	4.86e-26	7	24507005	24515682	+	protein_coding	Zfp428	ENSMUSG00000064264	2127.99	2540.49	2472.32	2727.25	2831.78	2998.6	3140.46	2719.59	2549.84	2162.59	1644.04	1498.24	1613.05	1492.53	1313.52	1308.97	1166.32	1516.73	1320.35	1134.77	7	24507005	24515682	+	protein_coding	Zfp428
ENSMUSG00000024107	32.6893	-0.892797	0.186264	-4.79318	1.64e-06	1.01e-05	17	88716480	88791990	-	protein_coding	Lhcgr	ENSMUSG00000024107	33.3165	42.7487	34.539	54.2509	42.3532	44.0446	35.3679	39.9819	56.3143	51.812	24.0324	21.297	33.8206	32.4255	17.3552	23.142	19.4851	3.46286	23.7392	20.2967	17	88716480	88791990	-	protein_coding	Lhcgr
ENSMUSG00000107108	41.6446	-0.892529	0.171634	-5.2002	1.99e-07	1.45e-06	5	114855024	114859383	-	lncRNA	Gm9936	ENSMUSG00000107108	74.3215	50.8913	44.5665	41.3778	61.1768	40.4734	66.5749	43.2457	60.007	66.4545	41.5105	39.3994	19.7287	17.1664	29.2298	17.3565	32.4751	23.0858	36.174	27.6773	5	114855024	114859383	-	lncRNA	Gm9936
ENSMUSG00000112106	57.716	-0.892509	0.213007	-4.19004	2.79e-05	0.000134813	10	119654063	119656395	+	TEC	Gm47026	ENSMUSG00000112106	20.5025	40.713	35.6532	102.065	85.8828	96.4219	118.587	80.7798	101.55	90.1078	50.2496	27.6861	42.2757	41.0087	38.3641	34.713	32.4751	53.0972	27.1305	35.0579	10	119654063	119656395	+	TEC	Gm47026
ENSMUSG00000048497	808.358	-0.892196	0.0880654	-10.1311	4.02e-24	3.41e-22	11	62648663	62666354	+	protein_coding	Mmgt2	ENSMUSG00000048497	1018.29	1052.43	1189.92	1118.12	1220.01	971.361	1133.85	938.351	934.263	970.911	698.033	664.466	653.865	652.324	429.313	488.875	486.199	552.904	512.089	481.585	11	62648663	62666354	+	protein_coding	Mmgt2
ENSMUSG00000062939	44.6175	-0.892086	0.164636	-5.41854	6.01e-08	4.8e-07	1	51987147	52107189	+	protein_coding	Stat4	ENSMUSG00000062939	80.3014	44.7843	55.7081	76.319	45.8826	60.7101	71.7761	47.3255	64.6229	39.4222	38.2334	40.4642	30.0627	27.657	34.7104	24.5884	19.4851	40.4001	30.5218	19.3741	1	51987147	52107189	+	protein_coding	Stat4
ENSMUSG00000111524	3.38419	-0.891839	0.323739	-2.75481	0.00587267	0.0163845	10	84092265	84096249	+	lncRNA	Gm34113	ENSMUSG00000111524	8.5427	4.0713	4.45665	1.83901	2.35295	0	8.32186	9.79149	5.53911	5.63174	4.36953	2.1297	1.87892	0	1.82686	0	1.85572	2.30858	0	2.76773	10	84092265	84096249	+	lncRNA	Gm34113
ENSMUSG00000086119	1917.98	-0.891813	0.0937246	-9.51526	1.81e-21	1.12e-19	9	118890074	118926455	-	lncRNA	Gm2415	ENSMUSG00000086119	2121.15	2094.69	2192.67	2577.38	2740.01	3005.74	2728.53	2457.66	2779.71	2342.8	1610.17	1597.27	1635.6	1343.75	1289.77	990.044	1406.64	1227.01	1165.48	1053.58	9	118890074	118926455	-	lncRNA	Gm2415
ENSMUSG00000102316	103.083	-0.891729	0.214846	-4.15055	3.32e-05	0.000157898	1	9191066	9192116	-	TEC	Gm37629	ENSMUSG00000102316	35.8793	97.7113	75.763	207.808	156.471	223.794	238.213	133.817	120.937	90.1078	73.1896	90.5121	52.6098	99.1838	52.0656	65.0869	64.0223	50.7887	49.7393	83.9545	1	9191066	9192116	-	TEC	Gm37629
ENSMUSG00000114774	7.19776	-0.891582	0.315572	-2.82529	0.00472382	0.0135155	14	29786827	29852408	-	lncRNA	Gm35281	ENSMUSG00000114774	3.41708	8.14261	15.5983	13.7926	11.7648	7.14236	8.32186	13.8713	20.3101	2.25269	2.18477	11.7133	7.51568	1.90738	0.913432	0	3.71144	0	6.78263	4.61288	14	29786827	29852408	-	lncRNA	Gm35281
ENSMUSG00000098438	0.990378	-0.891312	0.285593	-3.12091	0.00180291	0.00575129	17	85599532	85599872	+	processed_pseudogene	Gm27178	ENSMUSG00000098438	0	1.01783	0	2.75852	2.35295	4.76158	1.04023	2.44787	0.923185	4.50539	0	0	0	0	0	0	0	0	0	0	17	85599532	85599872	+	processed_pseudogene	Gm27178
ENSMUSG00000109793	12.0596	-0.891134	0.251246	-3.54686	0.000389855	0.00146208	8	22958206	22958441	-	processed_pseudogene	Gm10043	ENSMUSG00000109793	7.68843	13.2317	17.8266	10.1146	10.5883	30.9502	19.7644	11.4234	25.8492	16.8952	9.83144	9.58364	4.6973	9.5369	11.8746	6.50869	8.35074	6.92573	6.78263	2.76773	8	22958206	22958441	-	processed_pseudogene	Gm10043
ENSMUSG00000031790	2658.75	-0.891094	0.118465	-7.522	5.39e-14	1.14e-12	8	95352267	95375080	+	protein_coding	Mmp15	ENSMUSG00000031790	3667.38	3750.69	2616.05	3263.33	3489.43	3266.44	3327.7	3183.05	4628.85	3613.32	2812.89	2476.84	2093.12	1423.86	1372.89	1429.74	1546.74	1784.53	1805.31	1622.81	8	95352267	95375080	+	protein_coding	Mmp15
ENSMUSG00000005447	541.553	-0.890059	0.084143	-10.5779	3.77e-26	4.09e-24	7	25295048	25297986	-	protein_coding	Pafah1b3	ENSMUSG00000005447	694.521	695.175	777.685	609.632	710.592	695.19	755.209	813.509	692.389	617.238	441.323	367.373	509.188	394.828	361.719	346.407	362.793	367.063	276.957	342.276	7	25295048	25297986	-	protein_coding	Pafah1b3
ENSMUSG00000036052	15727.2	-0.890055	0.121686	-7.31437	2.59e-13	4.88e-12	4	42949813	42959425	+	protein_coding	Dnajb5	ENSMUSG00000036052	26631	24533.7	21351.8	14699.2	20418.9	17240.5	19842.4	26169.4	15269.5	19787.7	14066.6	14138	10381	12302.6	9062.16	7964.46	7629.79	12533.3	9627.94	10893.8	4	42949813	42959425	+	protein_coding	Dnajb5
ENSMUSG00000091568	4.60783	-0.889067	0.324865	-2.73673	0.00620531	0.0171932	14	6016758	6093942	-	protein_coding	Gm8206	ENSMUSG00000091568	3.41708	16.2852	10.0275	5.51704	7.05886	7.14236	0	4.89574	11.0782	4.50539	2.18477	4.25939	3.75784	1.90738	5.48059	0	4.6393	0	0	0	14	6016758	6093942	-	protein_coding	Gm8206
ENSMUSG00000010797	253.972	-0.888484	0.185704	-4.7844	1.71e-06	1.05e-05	6	17988939	18030585	-	protein_coding	Wnt2	ENSMUSG00000010797	215.276	351.15	379.929	376.078	382.355	251.173	339.116	333.726	467.132	269.197	229.4	318.39	247.078	88.6932	79.4686	141.022	134.54	147.749	218.175	109.787	6	17988939	18030585	-	protein_coding	Wnt2
ENSMUSG00000071671	17.9813	-0.88845	0.204206	-4.35076	1.36e-05	6.96e-05	16	10801380	10801713	+	processed_pseudogene	Gm10343	ENSMUSG00000071671	17.9397	15.2674	31.1965	20.2291	31.7649	33.331	23.9254	24.4787	20.3101	22.5269	15.2934	12.7782	9.39461	7.62952	17.3552	17.3565	7.42288	10.3886	9.04351	11.9935	16	10801380	10801713	+	processed_pseudogene	Gm10343
ENSMUSG00000030844	1194.7	-0.887277	0.11113	-7.98415	1.41e-15	3.82e-14	7	128373620	128418758	-	protein_coding	Rgs10	ENSMUSG00000030844	1150.7	1581.7	1363.73	1646.84	1717.66	1662.98	1702.86	1741.25	1774.36	1267.14	1115.32	1129.8	978.918	823.988	611.999	631.343	745.071	700.653	825.22	722.378	7	128373620	128418758	-	protein_coding	Rgs10
ENSMUSG00000027863	3.51435	-0.886161	0.326467	-2.7144	0.00663961	0.0182631	3	101275898	101287939	-	protein_coding	Cd2	ENSMUSG00000027863	1.70854	12.2139	8.91329	1.83901	4.70591	1.19039	8.32186	6.52766	5.53911	3.37904	0	4.25939	1.87892	5.72214	1.82686	0	0	0	2.26088	0	3	101275898	101287939	-	protein_coding	Cd2
ENSMUSG00000097304	6.06387	-0.88595	0.320085	-2.76786	0.00564263	0.0158159	3	37734729	37735104	+	processed_pseudogene	Rpl31-ps15	ENSMUSG00000097304	3.41708	8.14261	14.4841	1.83901	17.6472	2.38079	20.8047	1.63191	11.0782	7.88443	9.83144	3.19455	1.87892	1.90738	3.65373	0	1.85572	4.61715	2.26088	2.76773	3	37734729	37735104	+	processed_pseudogene	Rpl31-ps15
ENSMUSG00000091955	2338.92	-0.885945	0.104133	-8.50781	1.77e-17	6.25e-16	7	24862212	24862697	+	protein_coding	Gm9844	ENSMUSG00000091955	2188.64	2708.43	3127.45	3143.79	3536.49	3485.47	3734.44	3050.86	2854.49	2696.48	2028.55	2124.37	1717.33	1785.31	1219.43	1437.7	1250.76	1657.56	1671.92	1358.96	7	24862212	24862697	+	protein_coding	Gm9844
ENSMUSG00000112343	29.8944	-0.885167	0.294235	-3.00836	0.00262658	0.00802524	12	56488320	56529427	-	lncRNA	Sfta3-ps	ENSMUSG00000112343	3.41708	39.6952	24.5116	29.4242	64.7062	16.6655	44.73	62.8287	106.166	28.1587	8.73906	14.9079	34.76	14.3054	15.5283	28.9275	36.1865	9.2343	11.3044	3.69031	12	56488320	56529427	-	lncRNA	Sfta3-ps
ENSMUSG00000111945	14.76	-0.885162	0.301112	-2.93964	0.00328593	0.00978905	10	123583587	123584833	+	processed_pseudogene	Gm19169	ENSMUSG00000111945	5.97989	17.303	15.5983	22.0681	0	47.6158	28.0863	39.1659	12.0014	21.4006	8.73906	12.7782	13.1524	1.90738	11.8746	4.33912	11.1343	4.61715	4.52175	12.9161	10	123583587	123584833	+	processed_pseudogene	Gm19169
ENSMUSG00000060730	19.6916	-0.885083	0.27996	-3.16146	0.00156981	0.00509135	5	108517178	108517532	+	processed_pseudogene	Gm10086	ENSMUSG00000060730	11.9598	18.3209	11.1416	11.0341	18.8236	49.9965	41.6093	45.6936	21.2333	42.8012	17.4781	14.9079	20.6681	9.5369	5.48059	13.0174	3.71144	23.0858	2.26088	11.0709	5	108517178	108517532	+	processed_pseudogene	Gm10086
ENSMUSG00000117713	74.6372	-0.884194	0.195684	-4.51847	6.23e-06	3.41e-05	18	61484765	61489220	+	lncRNA	Gm46637	ENSMUSG00000117713	142.663	129.264	67.9639	115.858	101.177	66.6621	68.6554	127.289	81.2403	87.8551	102.684	67.0855	43.2152	24.7959	46.585	23.142	47.3209	54.2515	45.2175	49.8191	18	61484765	61489220	+	lncRNA	Gm46637
ENSMUSG00000105218	227.326	-0.883868	0.152308	-5.80316	6.51e-09	6.09e-08	5	99730853	99753973	-	lncRNA	Gm38413	ENSMUSG00000105218	199.045	325.704	246.23	387.112	254.119	340.453	351.599	332.095	325.884	226.396	107.054	205.516	170.042	173.572	200.955	198.153	166.087	83.1087	163.914	89.4899	5	99730853	99753973	-	lncRNA	Gm38413
ENSMUSG00000094462	4.13965	-0.883121	0.322349	-2.73964	0.00615057	0.0170597	7	42578465	42578588	-	protein_coding	Gm21028	ENSMUSG00000094462	8.5427	10.1783	4.45665	11.0341	3.52943	2.38079	4.16093	4.07979	2.76955	10.1371	1.09238	6.38909	3.75784	4.76845	0	0	0	3.46286	1.13044	0.922577	7	42578465	42578588	-	protein_coding	Gm21028
ENSMUSG00000062713	14.365	-0.883026	0.26162	-3.37523	0.00073755	0.00260294	16	94084930	94127032	+	protein_coding	Sim2	ENSMUSG00000062713	7.68843	7.12478	28.9682	22.0681	14.1177	22.6175	16.6437	26.1106	33.2347	16.8952	10.9238	4.25939	11.2735	10.4906	3.65373	3.61594	14.8458	15.0057	11.3044	6.45804	16	94084930	94127032	+	protein_coding	Sim2
ENSMUSG00000001334	8069.39	-0.882476	0.0850056	-10.3814	3.01e-25	2.91e-23	4	129136998	129144593	+	protein_coding	Fndc5	ENSMUSG00000001334	9644.71	9442.37	9971.75	10641.4	11283.6	11284.9	11298	10823.7	9947.32	10684.5	7074.27	6739.43	6590.32	5707.84	4035.54	4872.11	4654.14	5716.03	6041.06	4934.86	4	129136998	129144593	+	protein_coding	Fndc5
ENSMUSG00000086688	681.429	-0.882341	0.0812692	-10.857	1.85e-27	2.33e-25	11	99932161	99933109	+	processed_pseudogene	Gm11560	ENSMUSG00000086688	913.214	1060.57	968.207	830.314	972.946	838.037	877.957	851.859	753.319	798.58	509.05	601.639	503.551	494.965	365.373	506.954	441.661	510.195	430.697	399.476	11	99932161	99933109	+	processed_pseudogene	Gm11560
ENSMUSG00000091742	52.6735	-0.882028	0.188991	-4.66704	3.06e-06	1.79e-05	17	46439577	46440097	-	processed_pseudogene	Gm5093	ENSMUSG00000091742	46.9848	80.4083	60.1647	96.5481	47.0591	90.4699	93.621	74.2521	63.6998	42.8012	46.9725	55.3721	16.9103	41.0087	21.0089	28.9275	34.3308	47.3258	40.6958	24.9096	17	46439577	46440097	-	processed_pseudogene	Gm5093
ENSMUSG00000090226	11.045	-0.882023	0.268259	-3.28795	0.00100919	0.00344003	5	22334441	22336118	+	lncRNA	Gm16110	ENSMUSG00000090226	5.12562	4.0713	7.79913	14.7121	22.3531	26.1887	24.9656	18.767	11.0782	16.8952	4.36953	4.25939	6.57622	5.72214	5.48059	9.40144	8.35074	11.5429	6.78263	6.45804	5	22334441	22336118	+	lncRNA	Gm16110
ENSMUSG00000072214	12306.1	-0.880904	0.0675003	-13.0504	6.32e-39	2.54e-36	16	18620501	18629954	-	protein_coding	2005-09-01	ENSMUSG00000072214	15877.5	14508.1	16174.3	16443.5	16607.1	17640.4	17434.3	15628.8	14485.7	15075	10589.6	9854.11	8444.81	8320.95	7313.85	8011.47	7157.51	9506.71	9011.85	8036.57	16	18620501	18629954	-	protein_coding	2005-09-01
ENSMUSG00000036639	221.393	-0.880726	0.0911836	-9.65882	4.51e-22	3.01e-20	5	140321655	140338137	+	protein_coding	Nudt1	ENSMUSG00000036639	240.05	252.421	278.54	313.552	330.59	303.55	269.42	317.407	283.418	291.724	148.564	205.516	179.437	142.1	143.409	121.495	171.654	126.972	165.044	142.999	5	140321655	140338137	+	protein_coding	Nudt1
ENSMUSG00000058173	126.984	-0.880585	0.141341	-6.23021	4.66e-10	5.25e-09	9	15493431	15545260	+	protein_coding	Smco4	ENSMUSG00000058173	133.266	132.317	209.462	158.155	183.53	170.226	194.524	172.167	165.25	146.425	57.8963	104.355	139.98	100.137	120.573	70.1492	78.8681	60.023	76.8698	65.503	9	15493431	15545260	+	protein_coding	Smco4
ENSMUSG00000049796	674.477	-0.880543	0.115111	-7.6495	2.02e-14	4.61e-13	3	19693400	19695396	-	protein_coding	Crh	ENSMUSG00000049796	940.551	888.562	880.188	903.874	956.476	930.888	1133.85	855.123	590.838	720.862	584.425	664.466	372.966	502.595	402.823	427.404	347.947	559.83	427.306	398.553	3	19693400	19695396	-	protein_coding	Crh
ENSMUSG00000113919	13.3919	-0.880344	0.292385	-3.01091	0.00260466	0.00796622	13	45246631	45267711	-	lncRNA	Gm34466	ENSMUSG00000113919	6.83416	12.2139	34.539	11.9536	16.4707	19.0463	16.6437	35.0862	30.4651	4.50539	2.18477	2.1297	9.39461	7.62952	25.5761	6.50869	5.56716	6.92573	6.78263	7.38061	13	45246631	45267711	-	lncRNA	Gm34466
ENSMUSG00000019301	18.4922	-0.880023	0.231383	-3.80332	0.000142771	0.000592081	11	101078410	101080527	+	protein_coding	Hsd17b1	ENSMUSG00000019301	31.608	27.4813	50.1373	20.2291	25.8825	28.5695	21.8449	13.0553	15.6941	14.6425	12.0162	13.843	12.213	11.4443	12.788	10.1246	18.5572	2.30858	13.5653	13.8387	11	101078410	101080527	+	protein_coding	Hsd17b1
ENSMUSG00000014551	1756.52	-0.878917	0.109595	-8.01966	1.06e-15	2.92e-14	6	92169524	92184033	-	protein_coding	Mrps25	ENSMUSG00000014551	1949.44	2378.66	2348.65	2345.66	2642.37	2284.37	2576.66	2247.96	2058.7	2065.72	1529.34	1840.06	1279.55	1197.83	879.635	905.431	1005.8	1139.28	1451.48	1003.76	6	92169524	92184033	-	protein_coding	Mrps25
ENSMUSG00000039913	3410.36	-0.878887	0.127345	-6.90163	5.14e-12	8.03e-11	2	136081103	136387967	-	protein_coding	Pak7	ENSMUSG00000039913	5075.22	3790.38	4319.6	4690.4	4292.96	5247.26	4555.18	4402.9	3538.57	4656.32	3986.1	3541.69	2413.47	1914.06	1706.29	1849.19	2114.59	1993.45	2043.83	2075.8	2	136081103	136387967	-	protein_coding	Pak7
ENSMUSG00000044469	393.105	-0.878425	0.103887	-8.45559	2.78e-17	9.52e-16	17	56162476	56173955	+	protein_coding	Tnfaip8l1	ENSMUSG00000044469	504.019	541.483	533.683	592.162	523.532	494.014	478.507	487.942	457.9	504.604	375.78	388.67	249.897	300.412	216.483	234.313	212.48	240.092	307.479	218.651	17	56162476	56173955	+	protein_coding	Tnfaip8l1
ENSMUSG00000009356	66.6853	-0.878378	0.149023	-5.89423	3.76e-09	3.68e-08	11	87806427	87828289	-	protein_coding	Lpo	ENSMUSG00000009356	60.6531	72.2656	63.5072	74.48	87.0593	74.9948	109.224	89.7553	123.707	118.266	56.8039	52.1776	63.8833	41.0087	33.797	36.8826	47.3209	43.8629	40.6958	43.3611	11	87806427	87828289	-	protein_coding	Lpo
ENSMUSG00000053368	117.896	-0.87794	0.204402	-4.29517	1.75e-05	8.77e-05	5	150018674	150082184	+	protein_coding	Rxfp2	ENSMUSG00000053368	218.693	136.389	142.613	204.13	168.236	138.086	171.638	176.247	72.0084	137.414	133.271	70.28	39.4573	119.211	31.0567	44.1144	67.7338	117.737	64.435	105.174	5	150018674	150082184	+	protein_coding	Rxfp2
ENSMUSG00000113121	357.415	-0.877636	0.128011	-6.85592	7.09e-12	1.08e-10	13	68998792	69031550	+	lncRNA	Gm35161	ENSMUSG00000113121	567.235	349.114	472.405	386.193	342.355	547.581	680.312	487.942	402.509	433.644	265.449	290.704	195.408	231.747	197.301	313.14	165.159	315.121	257.74	247.251	13	68998792	69031550	+	lncRNA	Gm35161
ENSMUSG00000058101	6.1861	-0.877115	0.306317	-2.86342	0.00419092	0.0121578	15	33403984	33405976	-	transcribed_processed_pseudogene	1700084J12Rik	ENSMUSG00000058101	2.56281	4.0713	8.91329	9.19506	1.17648	7.14236	26.0058	8.15957	13.8478	6.75808	6.5543	4.25939	3.75784	3.81476	1.82686	2.16956	1.85572	2.30858	5.65219	3.69031	15	33403984	33405976	-	transcribed_processed_pseudogene	1700084J12Rik
ENSMUSG00000105283	4.39796	-0.876912	0.319301	-2.74635	0.00602632	0.0167593	5	96910340	96922175	-	lncRNA	Gm33370	ENSMUSG00000105283	11.9598	5.08913	7.79913	7.35605	4.70591	5.95197	8.32186	1.63191	2.76955	9.01078	0	4.25939	3.75784	3.81476	0	2.89275	1.85572	0	6.78263	0	5	96910340	96922175	-	lncRNA	Gm33370
ENSMUSG00000111446	67.0368	-0.876848	0.140217	-6.25349	4.01e-10	4.56e-09	9	22092512	22092772	+	processed_pseudogene	Gm6581	ENSMUSG00000111446	72.6129	63.1052	69.078	90.1116	95.2946	110.707	113.385	86.4915	84.0098	93.4868	43.6953	74.5394	46.0336	44.8234	39.2776	51.3463	31.5472	39.2458	38.4349	53.5095	9	22092512	22092772	+	processed_pseudogene	Gm6581
ENSMUSG00000079669	169.419	-0.876837	0.108807	-8.05864	7.71e-16	2.17e-14	9	117252535	117254696	+	lncRNA	Gm17396	ENSMUSG00000079669	172.562	203.565	194.978	269.415	172.942	251.173	227.811	239.891	256.645	217.385	101.592	162.922	149.374	107.767	122.4	104.139	115.055	105.04	118.696	95.0254	9	117252535	117254696	+	lncRNA	Gm17396
ENSMUSG00000032611	56.065	-0.876586	0.184088	-4.76178	1.92e-06	1.16e-05	9	108392804	108410934	+	protein_coding	1700102P08Rik	ENSMUSG00000032611	62.3617	97.7113	84.6763	47.8143	111.765	69.0429	58.253	88.9393	72.0084	49.5593	21.8477	59.6315	46.0336	27.657	32.8835	47.7304	50.1044	28.8572	19.2175	45.2063	9	108392804	108410934	+	protein_coding	1700102P08Rik
ENSMUSG00000049916	78.1413	-0.876269	0.126462	-6.92908	4.24e-12	6.71e-11	16	17113397	17125167	-	protein_coding	2610318N02Rik	ENSMUSG00000049916	72.6129	143.513	105.845	102.985	89.4122	95.2315	116.506	110.97	103.397	78.8443	57.8963	66.0206	62.0044	49.5919	52.9791	38.3289	62.1666	49.6344	48.6088	56.2772	16	17113397	17125167	-	protein_coding	2610318N02Rik
ENSMUSG00000004341	9.14712	-0.875944	0.307214	-2.85125	0.00435476	0.0125747	13	21312124	21319624	+	protein_coding	Gpx6	ENSMUSG00000004341	3.41708	14.2496	13.3699	11.9536	15.2942	4.76158	9.3621	16.3191	26.7724	14.6425	2.18477	21.297	7.51568	2.86107	3.65373	3.61594	3.71144	2.30858	5.65219	0	13	21312124	21319624	+	protein_coding	Gpx6
ENSMUSG00000020428	4.84104	-0.875769	0.320025	-2.73657	0.00620839	0.0171989	11	42306436	42321072	-	protein_coding	Gabra6	ENSMUSG00000020428	1.70854	0	2.22832	7.35605	2.35295	2.38079	2.08047	21.2149	36.9274	4.50539	0	2.1297	0	0	5.48059	4.33912	1.85572	0	2.26088	0	11	42306436	42321072	-	protein_coding	Gabra6
ENSMUSG00000117187	440.397	-0.875295	0.0996099	-8.78723	1.53e-18	6.19e-17	17	74438284	74438639	-	processed_pseudogene	Gm4708	ENSMUSG00000117187	447.637	531.305	576.022	584.806	622.356	728.521	651.186	621.759	527.139	437.023	377.964	391.864	338.206	285.153	270.376	241.545	274.647	305.886	323.305	271.238	17	74438284	74438639	-	processed_pseudogene	Gm4708
ENSMUSG00000093738	27.5343	-0.874654	0.322576	-2.71146	0.00669869	0.0184016	3	154330820	154334254	+	lncRNA	AI606473	ENSMUSG00000093738	13.6683	66.1587	27.854	25.7462	65.8827	11.9039	33.2875	57.117	114.475	33.7904	0	6.38909	43.2152	3.81476	0	15.9101	18.5572	0	0	12.9161	3	154330820	154334254	+	lncRNA	AI606473
ENSMUSG00000032908	555.641	-0.874628	0.14965	-5.84449	5.08e-09	4.85e-08	1	78310344	78420289	+	protein_coding	Sgpp2	ENSMUSG00000032908	779.094	779.655	567.108	605.035	922.358	684.477	677.192	727.018	767.167	769.295	519.974	633.585	406.786	213.627	384.555	195.261	340.525	324.355	482.697	333.05	1	78310344	78420289	+	protein_coding	Sgpp2
ENSMUSG00000117901	782.083	-0.874507	0.079503	-10.9997	3.84e-28	5.18e-26	19	7087468	7088421	-	lncRNA	AC109619.1	ENSMUSG00000117901	882.461	952.685	1007.2	962.723	1023.53	1140.4	1191.07	1100.73	949.957	941.626	572.409	589.926	513.885	625.621	584.596	522.141	442.589	698.344	474.784	464.979	19	7087468	7088421	-	lncRNA	AC109619.1
ENSMUSG00000113390	8.45561	-0.874038	0.284531	-3.07186	0.00212732	0.00665462	12	106094822	106098971	-	lncRNA	Gm32635	ENSMUSG00000113390	5.12562	26.4635	7.79913	9.19506	15.2942	11.9039	6.2414	13.0553	11.0782	11.2635	7.64668	4.25939	4.6973	0	6.39402	8.67825	1.85572	9.2343	3.39132	5.53546	12	106094822	106098971	-	lncRNA	Gm32635
ENSMUSG00000030484	2.06756	-0.873882	0.30782	-2.83894	0.00452638	0.013018	7	24349195	24355109	+	protein_coding	Lypd5	ENSMUSG00000030484	1.70854	0	0	0	9.41182	2.38079	10.4023	1.63191	3.69274	7.88443	0	0	1.87892	0	0.913432	1.44637	0	0	0	0	7	24349195	24355109	+	protein_coding	Lypd5
ENSMUSG00000081656	130.225	-0.873859	0.202356	-4.31841	1.57e-05	7.95e-05	4	76927310	76927655	+	processed_pseudogene	Gm11246	ENSMUSG00000081656	73.4672	104.836	106.96	204.13	160.001	334.501	315.191	196.646	117.244	114.887	92.8525	116.068	77.0358	116.35	56.6328	70.1492	77.9402	87.7259	96.0873	85.7996	4	76927310	76927655	+	processed_pseudogene	Gm11246
ENSMUSG00000104882	220.562	-0.873359	0.130061	-6.71502	1.88e-11	2.68e-10	5	27860017	27860438	-	processed_pseudogene	Gm43096	ENSMUSG00000104882	256.281	317.562	309.737	275.852	318.825	298.789	327.673	273.346	261.261	238.786	182.428	269.407	177.558	133.517	102.304	128.727	106.704	128.126	165.044	139.309	5	27860017	27860438	-	processed_pseudogene	Gm43096
ENSMUSG00000104169	2.3243	-0.873275	0.326515	-2.67453	0.00748335	0.0202994	1	159209134	159211141	-	unprocessed_pseudogene	Gm7430	ENSMUSG00000104169	3.41708	0	7.79913	1.83901	4.70591	4.76158	4.16093	3.26383	1.84637	4.50539	0	0	2.81838	0.95369	0	0	0	2.30858	2.26088	1.84515	1	159209134	159211141	-	unprocessed_pseudogene	Gm7430
ENSMUSG00000071379	2959.32	-0.873215	0.148327	-5.88709	3.93e-09	3.83e-08	12	17690855	17791933	+	protein_coding	Hpcal1	ENSMUSG00000071379	3246.22	3222.44	3722.41	4102.84	3829.43	3573.56	4220.22	4930.01	4750.71	3157.15	1713.95	1858.16	2199.28	1834.9	4189	1732.76	1652.52	1477.49	2503.92	1269.47	12	17690855	17791933	+	protein_coding	Hpcal1
ENSMUSG00000020467	269.439	-0.872294	0.144113	-6.05286	1.42e-09	1.49e-08	11	28853203	28926743	+	protein_coding	Efemp1	ENSMUSG00000020467	306.683	357.257	530.341	349.412	440.002	278.552	278.782	307.616	320.345	354.799	247.971	239.591	262.11	134.47	144.322	111.371	165.159	147.749	224.957	187.283	11	28853203	28926743	+	protein_coding	Efemp1
ENSMUSG00000098128	271.298	-0.871701	0.13689	-6.36788	1.92e-10	2.3e-09	12	81228283	81243258	+	lncRNA	Gm3693	ENSMUSG00000098128	360.502	385.756	373.244	378.836	322.355	373.784	327.673	306.8	273.263	440.402	286.204	321.584	166.285	145.915	152.543	168.503	151.241	186.995	178.609	125.47	12	81228283	81243258	+	lncRNA	Gm3693
ENSMUSG00000003476	98.6352	-0.871611	0.171919	-5.0699	3.98e-07	2.74e-06	6	55090048	55133016	-	protein_coding	Crhr2	ENSMUSG00000003476	116.181	142.496	133.699	117.697	135.295	134.515	157.075	93.8351	183.714	84.476	63.3582	57.5018	72.3385	49.5919	131.534	95.4607	44.5373	60.023	58.7828	40.5934	6	55090048	55133016	-	protein_coding	Crhr2
ENSMUSG00000086191	173.798	-0.871571	0.149249	-5.8397	5.23e-09	4.98e-08	11	95700105	95712754	-	lncRNA	Zfp652os	ENSMUSG00000086191	197.336	204.583	231.746	276.771	267.06	296.408	238.213	175.431	250.183	137.414	128.901	93.7067	131.524	188.831	62.1134	105.585	90.9303	133.897	133.392	131.928	11	95700105	95712754	-	lncRNA	Zfp652os
ENSMUSG00000056629	6721.28	-0.871399	0.0793961	-10.9753	5.02e-28	6.7e-26	19	6977740	6980501	-	protein_coding	Fkbp2	ENSMUSG00000056629	7280.94	8159.91	8374.04	9140.81	9030.64	9720.76	10386.7	9558.94	8331.74	7210.87	5355.95	5696.94	4815.68	5290.12	3840.98	4451.22	4051.96	4902.26	4669.84	4155.29	19	6977740	6980501	-	protein_coding	Fkbp2
ENSMUSG00000118257	101.556	-0.871201	0.117539	-7.41202	1.24e-13	2.48e-12	18	38601533	38789045	+	lncRNA	9630014M24Rik	ENSMUSG00000118257	128.14	157.763	123.672	126.892	117.648	151.18	141.472	147.688	108.013	118.266	88.483	92.6418	74.2174	74.3878	42.9313	60.7477	77.9402	80.8001	61.0437	57.1998	18	38601533	38789045	+	lncRNA	9630014M24Rik
ENSMUSG00000052135	1753.54	-0.870988	0.106371	-8.18822	2.65e-16	7.97e-15	4	120267078	120287349	-	protein_coding	Foxo6	ENSMUSG00000052135	2334.72	2557.8	2338.63	1639.48	2992.96	1862.97	2248.98	2563.74	2243.34	2027.42	1338.17	1514.21	1263.57	1000.42	1581.15	1409.49	1116.22	1083.88	1036.61	917.041	4	120267078	120287349	-	protein_coding	Foxo6
ENSMUSG00000093105	7.96933	-0.870596	0.293559	-2.96566	0.00302032	0.00907629	6	117935468	117935593	-	miRNA	Gm25535	ENSMUSG00000093105	5.97989	7.12478	2.22832	11.9536	9.41182	15.4751	27.0461	11.4234	8.30866	12.3898	4.36953	5.32424	7.51568	7.62952	1.82686	2.89275	4.6393	9.2343	0	4.61288	6	117935468	117935593	-	miRNA	Gm25535
ENSMUSG00000042834	6668.27	-0.870231	0.131411	-6.62222	3.54e-11	4.84e-10	18	33437018	33464029	-	protein_coding	Nrep	ENSMUSG00000042834	10042.8	8420.47	7566.27	7838.79	9180.05	10540.9	8732.75	8204.45	6565.69	9919.74	7326.61	6883.18	5148.24	3845.28	3967.03	2974.47	3550.92	4796.07	3514.53	4347.18	18	33437018	33464029	-	protein_coding	Nrep
ENSMUSG00000085402	3.49023	-0.86956	0.324837	-2.67691	0.00743039	0.0201752	11	32903136	32926160	-	lncRNA	Gm12111	ENSMUSG00000085402	0	13.2317	11.1416	7.35605	7.05886	3.57118	4.16093	2.44787	7.38548	0	0	0	4.6973	3.81476	0.913432	2.16956	1.85572	0	0	0	11	32903136	32926160	-	lncRNA	Gm12111
ENSMUSG00000044933	2727.04	-0.869512	0.079705	-10.9091	1.04e-27	1.34e-25	15	78537007	78544685	-	protein_coding	Sstr3	ENSMUSG00000044933	3712.66	3273.33	3769.21	3462.86	3563.55	3587.85	3717.79	4048.78	2917.26	3305.83	2493.91	1980.62	1843.22	2174.41	1618.6	1694.43	1534.68	2191.99	1777.05	1872.83	15	78537007	78544685	-	protein_coding	Sstr3
ENSMUSG00000026308	24.8115	-0.869016	0.262355	-3.31237	0.000925082	0.00318226	1	91351015	91362416	+	protein_coding	Klhl30	ENSMUSG00000026308	39.2964	52.927	62.3931	29.4242	50.5885	19.0463	26.0058	22.8468	22.1564	13.5162	19.6629	10.6485	43.2152	11.4443	9.13432	13.0174	11.1343	8.08001	6.78263	24.9096	1	91351015	91362416	+	protein_coding	Klhl30
ENSMUSG00000001864	304.166	-0.868577	0.137626	-6.31114	2.77e-10	3.22e-09	2	31950138	31973442	+	protein_coding	Aif1l	ENSMUSG00000001864	356.23	418.326	446.779	392.629	456.473	436.875	406.731	310.88	396.97	349.168	264.357	292.833	275.262	154.498	235.665	124.388	265.368	202	119.826	178.057	2	31950138	31973442	+	protein_coding	Aif1l
ENSMUSG00000075046	5.99374	-0.866982	0.326482	-2.65553	0.00791847	0.0213187	10	58229978	58232675	-	protein_coding	Duxf3	ENSMUSG00000075046	4.27135	0	2.22832	1.83901	43.5296	9.52315	15.6035	8.97553	1.84637	4.50539	2.18477	2.1297	0	5.72214	1.82686	1.44637	5.56716	2.30858	4.52175	1.84515	10	58229978	58232675	-	protein_coding	Duxf3
ENSMUSG00000057729	85.8371	-0.866809	0.172553	-5.02344	5.08e-07	3.42e-06	10	79874475	79883174	+	protein_coding	Prtn3	ENSMUSG00000057729	62.3617	102.8	145.955	117.697	141.177	71.4236	130.029	116.682	151.402	88.9814	37.141	29.8158	62.9439	97.2764	62.1134	62.9173	52.888	61.1772	71.2176	50.7417	10	79874475	79883174	+	protein_coding	Prtn3
ENSMUSG00000001053	906.765	-0.866498	0.0781254	-11.0911	1.39e-28	1.96e-26	11	51643062	51650842	-	protein_coding	N4bp3	ENSMUSG00000001053	1207.94	1279.41	1166.53	984.791	1365.89	1057.07	1107.85	1259.84	1134.59	1187.17	675.093	745.394	657.622	669.491	567.241	794.783	618.883	612.927	523.393	519.411	11	51643062	51650842	-	protein_coding	N4bp3
ENSMUSG00000047497	37.4441	-0.865176	0.210755	-4.10513	4.04e-05	0.000188466	15	11064789	11349231	+	protein_coding	Adamts12	ENSMUSG00000047497	61.5074	54.9626	72.4205	42.2973	47.0591	28.5695	59.2933	15.5032	58.1607	56.3174	39.3258	30.8806	30.0627	22.8886	12.788	15.9101	18.5572	35.7829	22.6088	23.987	15	11064789	11349231	+	protein_coding	Adamts12
ENSMUSG00000063229	19243.5	-0.865031	0.0729979	-11.8501	2.15e-32	4.59e-30	7	46841474	46855627	+	protein_coding	Ldha	ENSMUSG00000063229	26435.4	25392.7	25775	24697.9	26259	24681.6	25411.8	25231	21067.1	24179.3	16497.2	17220.7	12438.5	13924.8	13202.7	13205.4	10379	13948.4	12634.9	12287.8	7	46841474	46855627	+	protein_coding	Ldha
ENSMUSG00000037465	2044.94	-0.864644	0.180198	-4.7983	1.6e-06	9.83e-06	15	38291462	38300706	-	protein_coding	Klf10	ENSMUSG00000037465	2836.18	3090.12	3525.21	1879.47	3155.31	2122.47	2820.07	3319.31	1594.34	2560.19	2399.96	2084.97	1157.42	1250.29	1008.43	1080.44	859.198	1609.08	1053.57	1492.73	15	38291462	38300706	-	protein_coding	Klf10
ENSMUSG00000097532	18.1689	-0.86449	0.206727	-4.18181	2.89e-05	0.000139171	3	95427670	95431087	+	transcribed_unprocessed_pseudogene	Gm4349	ENSMUSG00000097532	19.6482	22.3922	28.9682	15.6316	21.1766	28.5695	21.8449	25.2947	32.3115	24.7796	3.27715	11.7133	15.0314	8.58321	12.788	11.571	10.2065	24.24	12.4348	12.9161	3	95427670	95431087	+	transcribed_unprocessed_pseudogene	Gm4349
ENSMUSG00000113154	133.527	-0.86415	0.153537	-5.62827	1.82e-08	1.58e-07	12	37938462	37941308	+	TEC	Gm48713	ENSMUSG00000113154	104.221	197.458	154.868	168.27	194.119	190.463	229.891	206.437	154.172	147.551	56.8039	100.096	134.343	112.535	59.3731	100.523	100.209	116.583	53.1306	89.4899	12	37938462	37941308	+	TEC	Gm48713
ENSMUSG00000021194	14561.2	-0.864011	0.0625611	-13.8107	2.2e-43	1.15e-40	12	102554968	102565028	+	protein_coding	Chga	ENSMUSG00000021194	18620.5	16171.2	18663.3	17972.7	20320.1	19289.1	20689.2	20524.6	16250.8	19826	12576.6	10553.7	11141.1	9996.58	9010.09	10361.8	9293.44	10073.5	10379.7	9509.92	12	102554968	102565028	+	protein_coding	Chga
ENSMUSG00000046908	34.7341	-0.863978	0.194461	-4.44294	8.87e-06	4.71e-05	14	55765961	55768494	+	protein_coding	Ltb4r1	ENSMUSG00000046908	33.3165	33.5883	46.7948	53.3313	43.5296	76.1852	47.8507	53.0372	39.697	31.5377	24.0324	15.9727	18.7892	23.8423	27.403	23.8652	30.6194	10.3886	45.2175	15.6838	14	55765961	55768494	+	protein_coding	Ltb4r1
ENSMUSG00000113167	176.136	-0.863443	0.11423	-7.55878	4.07e-14	8.72e-13	12	14128115	14130648	-	TEC	Gm48482	ENSMUSG00000113167	240.05	205.601	246.23	233.555	220.001	259.506	241.334	260.29	180.944	203.869	103.776	76.6691	113.675	108.721	122.4	187.306	115.055	143.132	137.913	122.703	12	14128115	14130648	-	TEC	Gm48482
ENSMUSG00000112734	40.7572	-0.863224	0.21674	-3.98277	6.81e-05	0.000302761	10	53337752	53345085	-	lncRNA	Gm47644	ENSMUSG00000112734	23.9196	43.7665	34.539	79.997	27.059	89.2795	87.3796	57.117	62.7766	36.0431	28.402	13.843	15.9708	33.3792	22.8358	28.2043	37.1144	33.4743	30.5218	29.5225	10	53337752	53345085	-	lncRNA	Gm47644
ENSMUSG00000115647	9.06444	-0.863121	0.256403	-3.36627	0.000761912	0.00267745	15	26672936	26674753	-	TEC	Gm49265	ENSMUSG00000115647	8.5427	14.2496	11.1416	20.2291	7.05886	19.0463	12.4828	8.15957	14.771	6.75808	8.73906	6.38909	5.63676	5.72214	7.30746	4.33912	7.42288	6.92573	4.52175	1.84515	15	26672936	26674753	-	TEC	Gm49265
ENSMUSG00000025056	3.53501	-0.863082	0.325948	-2.64791	0.00809905	0.0217407	X	86191763	86195947	+	protein_coding	Nr0b1	ENSMUSG00000025056	3.41708	0	2.22832	7.35605	2.35295	9.52315	4.16093	8.15957	5.53911	11.2635	0	2.1297	5.63676	3.81476	1.82686	1.44637	0	0	0	1.84515	X	86191763	86195947	+	protein_coding	Nr0b1
ENSMUSG00000027329	973.308	-0.862241	0.0968214	-8.90547	5.32e-19	2.26e-17	2	131170260	131187282	-	protein_coding	Spef1	ENSMUSG00000027329	1203.67	1387.3	1187.7	1201.79	1261.18	1367.76	1277.41	1321.85	1321.08	1085.8	711.141	933.872	699.898	647.556	613.826	603.861	637.44	603.692	937.133	462.211	2	131170260	131187282	-	protein_coding	Spef1
ENSMUSG00000044988	3.73177	-0.861951	0.297043	-2.90178	0.00371053	0.0109181	13	3940687	3945349	-	protein_coding	Ucn3	ENSMUSG00000044988	0	0	4.45665	1.83901	4.70591	2.38079	4.16093	36.7181	14.771	0	0	0	3.75784	0	0	0	0	0	0	1.84515	13	3940687	3945349	-	protein_coding	Ucn3
ENSMUSG00000082192	404.186	-0.861532	0.0874176	-9.85535	6.5e-23	4.78e-21	X	49660959	49661299	+	processed_pseudogene	Gm14719	ENSMUSG00000082192	445.929	499.753	540.368	488.258	636.474	561.866	560.686	523.844	527.139	448.286	356.117	354.595	323.174	242.237	261.242	246.607	258.873	263.178	305.218	239.87	X	49660959	49661299	+	processed_pseudogene	Gm14719
ENSMUSG00000047420	123.187	-0.861335	0.248783	-3.46219	0.000535802	0.0019465	6	35312667	35326141	-	protein_coding	Fam180a	ENSMUSG00000047420	91.4069	132.317	316.422	222.52	177.648	73.8044	151.874	83.2276	200.331	209.501	147.472	155.468	88.3093	58.1751	42.9313	50.6231	48.2487	101.577	56.5219	55.3546	6	35312667	35326141	-	protein_coding	Fam180a
ENSMUSG00000056797	14.5421	-0.861241	0.300568	-2.86538	0.00416508	0.0120933	8	34327909	34328353	+	processed_pseudogene	Gm4889	ENSMUSG00000056797	11.1055	13.2317	11.1416	28.5047	35.2943	38.0926	16.6437	33.4542	13.8478	3.37904	0	4.25939	15.0314	14.3054	5.48059	2.89275	16.7015	3.46286	10.1739	13.8387	8	34327909	34328353	+	processed_pseudogene	Gm4889
ENSMUSG00000079499	826.252	-0.861179	0.0987924	-8.71706	2.86e-18	1.12e-16	2	29245106	29253006	-	lncRNA	6530402F18Rik	ENSMUSG00000079499	1403.57	951.667	1054	959.045	987.064	1036.83	893.56	1117.05	1185.37	1120.72	707.864	773.08	626.62	599.871	587.337	547.453	458.363	566.755	539.219	409.624	2	29245106	29253006	-	lncRNA	6530402F18Rik
ENSMUSG00000104210	65.8236	-0.860952	0.215606	-3.99317	6.52e-05	0.000290772	1	180473354	180477087	-	TEC	Gm37984	ENSMUSG00000104210	26.4824	67.1765	77.9913	92.8701	68.2357	130.943	205.966	65.2766	76.6243	63.0754	36.0486	74.5394	34.76	46.7308	37.4507	39.7753	44.5373	42.7086	37.3045	47.974	1	180473354	180477087	-	TEC	Gm37984
ENSMUSG00000111533	2.99296	-0.860772	0.325532	-2.6442	0.00818839	0.0219421	9	120674404	120682399	+	lncRNA	Gm39458	ENSMUSG00000111533	0	2.03565	6.68497	5.51704	3.52943	8.33276	5.20116	2.44787	2.76955	9.01078	3.27715	2.1297	0.939461	1.90738	0	2.89275	0	0	2.26088	0.922577	9	120674404	120682399	+	lncRNA	Gm39458
ENSMUSG00000020163	7889.88	-0.859418	0.101701	-8.45047	2.9e-17	9.89e-16	10	80402996	80406830	-	protein_coding	Uqcr11	ENSMUSG00000020163	7720.04	9060.69	9961.72	11052.5	11057.7	12151.5	13136.1	10482.6	8905.04	8746.09	6659.17	7166.43	5727.89	6324.87	4280.34	4923.46	4295.06	5542.89	5716.63	4886.89	10	80402996	80406830	-	protein_coding	Uqcr11
ENSMUSG00000081470	9.49568	-0.859321	0.311359	-2.7599	0.00578189	0.0161633	2	149356686	149357405	+	processed_pseudogene	Gm14131	ENSMUSG00000081470	8.5427	12.2139	8.91329	4.59753	0	9.52315	26.0058	35.9021	16.6173	13.5162	4.36953	4.25939	9.39461	5.72214	3.65373	11.571	3.71144	4.61715	6.78263	0	2	149356686	149357405	+	processed_pseudogene	Gm14131
ENSMUSG00000031147	36.8948	-0.858931	0.183356	-4.6845	2.81e-06	1.65e-05	X	7673163	7681251	-	protein_coding	Magix	ENSMUSG00000031147	44.422	40.713	70.1922	38.6193	42.3532	65.4717	72.8163	36.7181	39.697	34.9168	28.402	23.4267	16.9103	42.9161	25.5761	29.6507	20.4129	28.8572	19.2175	16.6064	X	7673163	7681251	-	protein_coding	Magix
ENSMUSG00000028836	231.301	-0.858755	0.182819	-4.69731	2.64e-06	1.56e-05	4	134343180	134354484	+	protein_coding	Slc30a2	ENSMUSG00000028836	432.26	351.15	295.253	331.942	281.178	303.55	256.938	224.388	203.101	358.178	259.987	289.639	122.13	109.674	102.304	98.3535	107.632	154.675	238.522	105.174	4	134343180	134354484	+	protein_coding	Slc30a2
ENSMUSG00000086693	87.269	-0.858111	0.173111	-4.95701	7.16e-07	4.69e-06	13	40956413	41001151	-	lncRNA	A730081D07Rik	ENSMUSG00000086693	118.743	112.979	98.0462	120.455	131.765	127.372	81.1382	128.105	110.782	112.635	101.592	96.9012	60.1255	48.6382	30.1433	31.8202	48.2487	41.5544	82.522	61.8126	13	40956413	41001151	-	lncRNA	A730081D07Rik
ENSMUSG00000106304	38.268	-0.857372	0.177933	-4.81851	1.45e-06	8.96e-06	5	108364036	108364974	-	lncRNA	Gm42518	ENSMUSG00000106304	51.2562	33.5883	50.1373	36.7802	45.8826	59.5197	45.7702	52.2213	50.7752	75.4653	25.1248	48.983	32.8811	14.3054	21.9224	20.2492	23.1965	33.4743	22.6088	21.2193	5	108364036	108364974	-	lncRNA	Gm42518
ENSMUSG00000080059	119.157	-0.857024	0.146185	-5.86259	4.56e-09	4.38e-08	4	147821776	147822202	-	processed_pseudogene	Rps19-ps3	ENSMUSG00000080059	103.367	129.264	162.668	173.787	131.765	160.703	225.731	189.302	151.402	123.898	57.8963	75.6042	64.8228	90.6006	72.1611	79.5506	73.3009	96.9602	144.696	75.6513	4	147821776	147822202	-	processed_pseudogene	Rps19-ps3
ENSMUSG00000101360	10.5123	-0.856857	0.261803	-3.2729	0.0010645	0.00360888	7	143322772	143364625	-	lncRNA	4933417O13Rik	ENSMUSG00000101360	10.2512	6.10696	17.8266	14.7121	21.1766	14.2847	16.6437	13.8713	16.6173	11.2635	8.73906	8.51879	3.75784	1.90738	11.8746	7.23187	11.1343	2.30858	10.1739	1.84515	7	143322772	143364625	-	lncRNA	4933417O13Rik
ENSMUSG00000117767	61.6494	-0.856267	0.181451	-4.719	2.37e-06	1.41e-05	18	74936279	74938320	+	processed_pseudogene	Gm18786	ENSMUSG00000117767	107.638	81.4261	90.2471	70.802	55.2944	86.8988	95.7014	66.9085	75.7012	76.5916	71.0049	41.5291	29.1233	45.7771	29.2298	26.7579	35.2587	85.4173	29.3914	32.2902	18	74936279	74938320	+	processed_pseudogene	Gm18786
ENSMUSG00000000094	19.749	-0.855924	0.201405	-4.24977	2.14e-05	0.000105765	11	85886421	85916097	+	protein_coding	Tbx4	ENSMUSG00000000094	25.6281	37.6596	26.7399	22.0681	27.059	22.6175	32.2472	22.0308	18.4637	27.0323	8.73906	6.38909	17.8498	8.58321	12.788	16.6333	14.8458	23.0858	7.91307	16.6064	11	85886421	85916097	+	protein_coding	Tbx4
ENSMUSG00000028416	9577.14	-0.855217	0.0796406	-10.7385	6.72e-27	7.87e-25	4	40936397	40948294	-	protein_coding	Bag1	ENSMUSG00000028416	10080.4	11582.9	12122.1	13834.9	14287.1	13195.5	13735.2	12180.6	11762.3	10969.5	7953.64	8385.68	7030.92	7275.7	5400.21	5765.97	6229.65	6393.6	7064.11	6292.9	4	40936397	40948294	-	protein_coding	Bag1
ENSMUSG00000044217	26.8722	-0.855194	0.215987	-3.95947	7.51e-05	0.000330769	15	99590781	99594829	+	protein_coding	Aqp5	ENSMUSG00000044217	34.1708	34.6061	34.539	26.6657	49.412	30.9502	43.6898	38.35	24.0028	39.4222	20.7553	24.4915	5.63676	18.1201	12.788	15.9101	13.9179	39.2458	6.78263	23.987	15	99590781	99594829	+	protein_coding	Aqp5
ENSMUSG00000105402	21.8311	-0.854603	0.293885	-2.90795	0.00363806	0.0107301	5	64593856	64610700	-	lncRNA	Gm3716	ENSMUSG00000105402	5.97989	34.6061	54.5939	42.2973	63.5298	15.4751	34.3277	35.0862	9.23185	9.01078	15.2934	10.6485	21.6076	21.9349	6.39402	5.7855	20.4129	6.92573	2.26088	21.2193	5	64593856	64610700	-	lncRNA	Gm3716
ENSMUSG00000110373	277.557	-0.854422	0.17544	-4.87017	1.12e-06	7.05e-06	4	76451230	76490113	+	lncRNA	Gm42303	ENSMUSG00000110373	130.703	275.831	295.253	338.378	329.414	561.866	522.197	519.765	318.499	345.789	209.737	285.379	168.163	209.812	114.179	180.797	179.077	146.595	220.435	199.277	4	76451230	76490113	+	lncRNA	Gm42303
ENSMUSG00000029378	6.41893	-0.853301	0.311234	-2.74167	0.00611271	0.0169645	5	91139598	91148432	+	protein_coding	Areg	ENSMUSG00000029378	3.41708	18.3209	11.1416	10.1146	11.7648	11.9039	10.4023	8.15957	1.84637	4.50539	6.5543	2.1297	5.63676	0.95369	9.13432	1.44637	1.85572	2.30858	6.78263	0	5	91139598	91148432	+	protein_coding	Areg
ENSMUSG00000062380	30012.3	-0.852645	0.0828886	-10.2866	8.1e-25	7.39e-23	8	123411423	123422015	+	protein_coding	Tubb3	ENSMUSG00000062380	36243.2	36121.6	39725.4	38755.3	42862.6	40034.1	40808.3	40007.2	34864.1	38247.4	27289.9	23052.9	23120.1	23829.9	16734.1	22475.2	17180.3	21928	15706.3	21259.9	8	123411423	123422015	+	protein_coding	Tubb3
ENSMUSG00000104348	62.0064	-0.851682	0.186246	-4.57289	4.81e-06	2.7e-05	1	193281270	193283843	+	TEC	Gm37691	ENSMUSG00000104348	93.9697	95.6756	115.873	115.858	56.4709	99.9931	56.1726	89.7553	57.2375	33.7904	43.6953	31.9455	58.2466	57.2214	52.0656	49.1767	31.5472	39.2458	27.1305	35.0579	1	193281270	193283843	+	TEC	Gm37691
ENSMUSG00000019139	2790.96	-0.850795	0.0834254	-10.1983	2.02e-24	1.77e-22	8	70594372	70597290	+	protein_coding	Isyna1	ENSMUSG00000019139	2858.39	3595.98	4115.71	3467.46	3832.96	3214.06	3999.7	3617.14	4279.89	3053.53	1854.87	2259.61	2499.9	1921.69	2088.11	1653.21	1912.32	1751.05	2138.79	1704.92	8	70594372	70597290	+	protein_coding	Isyna1
ENSMUSG00000112056	136.286	-0.850575	0.214808	-3.9597	7.5e-05	0.000330506	12	44373196	44374262	+	TEC	Gm48181	ENSMUSG00000112056	65.7788	146.567	133.699	208.728	181.177	299.979	337.035	166.455	169.866	95.7395	83.0211	105.42	33.8206	130.656	46.585	115.71	98.3531	109.657	100.609	96.8706	12	44373196	44374262	+	TEC	Gm48181
ENSMUSG00000118029	111.287	-0.84995	0.126894	-6.69812	2.11e-11	2.99e-10	19	47252242	47254332	+	TEC	AC132288.1	ENSMUSG00000118029	190.502	152.674	158.211	131.489	135.295	96.4219	133.15	160.744	143.094	141.92	80.8363	112.874	90.1882	72.4805	68.5074	83.8897	89.0745	69.2573	44.0871	71.0384	19	47252242	47254332	+	TEC	AC132288.1
ENSMUSG00000035048	1363.94	-0.849621	0.110755	-7.67118	1.7e-14	3.95e-13	9	102626295	102634425	+	protein_coding	Anapc13	ENSMUSG00000035048	1283.97	1615.29	1982.09	1836.25	1976.48	1995.1	2132.48	1850.59	1639.58	1341.48	1149.19	1309.76	1010.86	1049.06	724.352	749.945	824.867	943.053	1103.31	761.126	9	102626295	102634425	+	protein_coding	Anapc13
ENSMUSG00000046997	292.856	-0.849237	0.116193	-7.30886	2.69e-13	5.06e-12	9	96943481	97018843	-	protein_coding	Spsb4	ENSMUSG00000046997	300.703	467.182	430.066	353.09	441.179	317.835	426.495	348.414	430.204	278.208	213.015	181.024	302.506	185.016	176.292	209.724	195.778	262.023	159.392	178.98	9	96943481	97018843	-	protein_coding	Spsb4
ENSMUSG00000115681	5.32763	-0.848273	0.314421	-2.69789	0.00697798	0.0190943	15	60120539	60187408	-	lncRNA	Gm2682	ENSMUSG00000115681	2.56281	4.0713	6.68497	7.35605	2.35295	10.7135	7.28163	16.3191	11.0782	7.88443	4.36953	3.19455	1.87892	9.5369	3.65373	2.16956	0	0	4.52175	0.922577	15	60120539	60187408	-	lncRNA	Gm2682
ENSMUSG00000110316	32.5437	-0.847834	0.266456	-3.18189	0.00146315	0.00477758	7	46511450	46512780	-	lncRNA	Gm45311	ENSMUSG00000110316	5.97989	60.0517	52.3656	82.7555	29.4119	39.283	36.4081	66.9085	43.3897	23.6533	29.4943	24.4915	17.8498	19.0738	21.9224	11.571	4.6393	42.7086	26.0001	12.9161	7	46511450	46512780	-	lncRNA	Gm45311
ENSMUSG00000020895	533.52	-0.847568	0.0891546	-9.50672	1.97e-21	1.21e-19	11	69070805	69073293	+	protein_coding	Tmem107	ENSMUSG00000020895	651.808	693.14	771	686.871	728.239	672.573	789.537	625.023	714.545	551.91	446.785	489.83	460.336	363.356	358.979	292.168	374.855	334.743	343.653	321.057	11	69070805	69073293	+	protein_coding	Tmem107
ENSMUSG00000099839	15.771	-0.847317	0.309036	-2.74181	0.00611023	0.016959	1	87142873	87146983	-	lncRNA	Gm29374	ENSMUSG00000099839	3.41708	26.4635	17.8266	21.1486	36.4708	2.38079	31.207	30.1904	40.6201	14.6425	1.09238	6.38909	14.0919	5.72214	6.39402	27.4811	12.99	6.92573	9.04351	0.922577	1	87142873	87146983	-	lncRNA	Gm29374
ENSMUSG00000028640	17.0487	-0.84731	0.292649	-2.89531	0.00378782	0.0111155	2	172549592	172558622	+	protein_coding	Tfap2c	ENSMUSG00000028640	15.3769	56.9983	16.7124	16.5511	27.059	27.3791	21.8449	23.6628	23.0796	7.88443	6.5543	5.32424	88.3093	5.72214	20.0955	0	25.9801	6.92573	6.78263	11.0709	2	172549592	172558622	+	protein_coding	Tfap2c
ENSMUSG00000070423	5.59422	-0.846999	0.326565	-2.59367	0.00949587	0.0249952	7	102702214	102712064	+	protein_coding	Olfr558	ENSMUSG00000070423	16.2311	10.1783	12.2558	18.3901	4.70591	0	10.4023	0	5.53911	7.88443	4.36953	6.38909	0.939461	0	2.7403	0	0	2.30858	6.78263	2.76773	7	102702214	102712064	+	protein_coding	Olfr558
ENSMUSG00000033170	499.158	-0.846879	0.0855576	-9.89835	4.23e-23	3.2e-21	15	78775137	78803042	-	protein_coding	Card10	ENSMUSG00000033170	794.471	720.621	647.328	474.465	581.18	583.293	619.979	665.821	699.774	649.902	338.639	392.929	437.789	375.754	301.433	322.542	315.472	365.909	377.566	318.289	15	78775137	78803042	-	protein_coding	Card10
ENSMUSG00000086691	155.301	-0.845796	0.141645	-5.97125	2.35e-09	2.37e-08	X	29564013	29564208	-	processed_pseudogene	Gm15432	ENSMUSG00000086691	153.769	185.244	233.974	210.567	238.825	238.079	231.972	188.486	164.327	171.205	148.564	145.884	124.009	99.1838	67.594	80.2738	85.3631	69.2573	145.827	123.625	X	29564013	29564208	-	processed_pseudogene	Gm15432
ENSMUSG00000104363	2.86355	-0.845758	0.326177	-2.59294	0.00951586	0.0250401	1	176031078	176032723	-	TEC	Gm38081	ENSMUSG00000104363	1.70854	4.0713	6.68497	1.83901	2.35295	9.52315	2.08047	6.52766	7.38548	2.25269	2.18477	0	0	1.90738	1.82686	0	0	6.92573	0	0	1	176031078	176032723	-	TEC	Gm38081
ENSMUSG00000092111	1.47865	-0.844406	0.295445	-2.85808	0.00426213	0.0123389	17	22942983	22965658	+	protein_coding	Vmn2r113	ENSMUSG00000092111	3.41708	0	2.22832	5.51704	9.41182	0	2.08047	1.63191	0	3.37904	0	0	0	1.90738	0	0	0	0	0	0	17	22942983	22965658	+	protein_coding	Vmn2r113
ENSMUSG00000021388	80.5597	-0.844337	0.120799	-6.98962	2.76e-12	4.49e-11	13	49544442	49567565	+	protein_coding	Aspn	ENSMUSG00000021388	76.03	85.4974	141.499	118.616	107.059	111.897	93.621	101.995	105.243	100.245	62.2658	66.0206	63.8833	57.2214	38.3641	45.5608	55.6716	58.8687	64.435	57.1998	13	49544442	49567565	+	protein_coding	Aspn
ENSMUSG00000004837	366.037	-0.844304	0.0981563	-8.60163	7.86e-18	2.9e-16	11	61653264	61672784	+	protein_coding	Grap	ENSMUSG00000004837	431.406	541.483	538.14	469.868	391.767	490.442	585.651	421.85	421.896	432.517	298.22	325.844	285.596	286.107	170.812	272.642	231.037	235.475	246.436	243.56	11	61653264	61672784	+	protein_coding	Grap
ENSMUSG00000116581	8.56078	-0.843961	0.274533	-3.07418	0.00211085	0.006608	16	30913330	30935629	-	lncRNA	Gm46565	ENSMUSG00000116581	14.5226	8.14261	8.91329	9.19506	4.70591	19.0463	13.523	11.4234	15.6941	11.2635	4.36953	1.06485	1.87892	12.398	5.48059	2.89275	9.2786	8.08001	5.65219	3.69031	16	30913330	30935629	-	lncRNA	Gm46565
ENSMUSG00000063767	25.5439	-0.843949	0.233613	-3.61259	0.000303155	0.00116595	3	90654016	90658669	+	protein_coding	S100a7a	ENSMUSG00000063767	46.1306	43.7665	22.2832	30.3437	31.7649	36.9022	39.5288	35.0862	20.3101	32.6641	28.402	40.4642	9.39461	11.4443	7.30746	9.40144	19.4851	24.24	9.04351	12.9161	3	90654016	90658669	+	protein_coding	S100a7a
ENSMUSG00000078695	1281.31	-0.843901	0.121728	-6.93266	4.13e-12	6.55e-11	11	97685825	97688621	+	protein_coding	Cisd3	ENSMUSG00000078695	1217.33	1257.02	1920.81	1714.88	1785.89	2126.04	2168.89	1683.32	1466.94	1243.49	992.976	1045.68	934.763	1111.05	585.51	770.918	760.845	820.699	1166.61	852.461	11	97685825	97688621	+	protein_coding	Cisd3
ENSMUSG00000027562	6542.41	-0.843667	0.105181	-8.02111	1.05e-15	2.89e-14	3	14886272	14900770	+	protein_coding	Car2	ENSMUSG00000027562	8406.87	9168.58	9313.28	8799.67	9776.52	8786.3	8381.16	7563.92	6926.66	7382.08	5993.9	6461.5	5679.04	4420.35	3602.58	3452.5	4377.64	4606.76	3558.62	4190.34	3	14886272	14900770	+	protein_coding	Car2
ENSMUSG00000062310	36.0453	-0.843562	0.27083	-3.11473	0.00184116	0.00585553	1	88499870	88510066	-	protein_coding	Glrp1	ENSMUSG00000062310	58.0903	48.8556	55.7081	28.5047	25.8825	70.2332	32.2472	57.933	81.2403	31.5377	6.5543	7.45394	49.7914	38.1476	5.48059	18.8029	25.9801	18.4686	10.1739	49.8191	1	88499870	88510066	-	protein_coding	Glrp1
ENSMUSG00000108057	126.645	-0.843512	0.184475	-4.57251	4.82e-06	2.7e-05	6	77323905	77324805	-	TEC	Gm44234	ENSMUSG00000108057	79.4471	149.62	120.329	185.74	144.707	265.458	257.978	166.455	164.327	123.898	80.8363	145.884	51.6703	107.767	57.5462	63.6405	69.5895	115.429	84.7829	97.7931	6	77323905	77324805	-	TEC	Gm44234
ENSMUSG00000048776	295.56	-0.843064	0.127261	-6.62469	3.48e-11	4.77e-10	6	147252100	147264183	-	protein_coding	Pthlh	ENSMUSG00000048776	323.768	341.99	377.701	347.573	388.237	428.542	482.668	385.132	396.97	353.673	274.188	264.082	228.289	244.145	193.648	162.717	124.333	279.338	133.392	180.825	6	147252100	147264183	-	protein_coding	Pthlh
ENSMUSG00000066809	28.4592	-0.842773	0.205891	-4.0933	4.25e-05	0.000197477	9	25101403	25101481	-	processed_pseudogene	Gm10180	ENSMUSG00000066809	22.211	33.5883	33.4249	66.2044	41.1767	38.0926	30.1668	39.1659	48.0056	22.5269	22.94	20.2321	31.0022	20.0275	6.39402	22.4188	14.8458	18.4686	22.6088	15.6838	9	25101403	25101481	-	processed_pseudogene	Gm10180
ENSMUSG00000018451	12607.8	-0.842034	0.0717123	-11.7418	7.78e-32	1.59e-29	11	71031940	71033513	-	protein_coding	6330403K07Rik	ENSMUSG00000018451	13733.2	16328	17577	15337.4	16868.3	15291.8	17387.5	17383.2	17823	14546.8	8680.07	8676.39	10640.3	8319.04	9431.18	8568.32	8231.97	8539.42	11368.8	7423.98	11	71031940	71033513	-	protein_coding	6330403K07Rik
ENSMUSG00000069805	10.3202	-0.841672	0.285582	-2.94721	0.00320652	0.00957446	13	62864752	62888282	-	protein_coding	Fbp1	ENSMUSG00000069805	19.6482	20.3565	4.45665	12.8731	10.5883	22.6175	8.32186	11.4234	8.30866	22.5269	8.73906	13.843	3.75784	4.76845	5.48059	3.61594	3.71144	4.61715	15.8261	0.922577	13	62864752	62888282	-	protein_coding	Fbp1
ENSMUSG00000117149	1.83939	-0.8414	0.305421	-2.75489	0.0058712	0.0163818	17	54354717	54355159	-	processed_pseudogene	Gm49919	ENSMUSG00000117149	1.70854	2.03565	3.34249	9.19506	8.23534	0	4.16093	4.07979	0	0	2.18477	0	0	0	0	0	0	0	0	1.84515	17	54354717	54355159	-	processed_pseudogene	Gm49919
ENSMUSG00000028031	132.813	-0.840928	0.141483	-5.94369	2.79e-09	2.78e-08	3	132085291	132180304	+	protein_coding	Dkk2	ENSMUSG00000028031	134.12	209.672	179.38	171.028	169.413	207.129	160.196	141.977	169.866	177.963	126.716	142.69	90.1882	106.813	63.9402	47.7304	76.0845	99.2687	97.2177	84.8771	3	132085291	132180304	+	protein_coding	Dkk2
ENSMUSG00000023078	2.46015	-0.840644	0.325243	-2.58466	0.00974742	0.0255498	5	95956950	95961068	+	protein_coding	Cxcl13	ENSMUSG00000023078	0	4.0713	4.45665	6.43654	2.35295	2.38079	0	8.97553	3.69274	6.75808	0	2.1297	1.87892	0	0	1.44637	1.85572	0	0	2.76773	5	95956950	95961068	+	protein_coding	Cxcl13
ENSMUSG00000049649	752.45	-0.840502	0.157834	-5.32522	1.01e-07	7.78e-07	4	133209339	133212536	-	protein_coding	Gpr3	ENSMUSG00000049649	1265.17	1226.48	930.325	684.112	1060.01	833.276	1036.07	1188.03	660.077	903.33	807.271	718.773	425.576	462.54	426.573	292.168	392.485	746.824	356.088	633.81	4	133209339	133212536	-	protein_coding	Gpr3
ENSMUSG00000038690	7437.49	-0.84047	0.0817204	-10.2847	8.26e-25	7.51e-23	5	145183697	145192062	-	protein_coding	Atp5j2	ENSMUSG00000038690	7157.93	8352.28	9099.36	9471.83	11197.7	10695.7	11533.1	10369.2	9299.24	8590.65	6011.38	6357.15	5648.04	5385.49	4493.17	4799.79	4700.54	5141.2	5402.36	5043.73	5	145183697	145192062	-	protein_coding	Atp5j2
ENSMUSG00000028443	675.986	-0.839858	0.0950519	-8.83579	9.94e-19	4.1e-17	4	41465150	41480926	+	protein_coding	Nudt2	ENSMUSG00000028443	615.074	763.369	926.983	941.574	971.77	959.458	1002.78	928.559	713.622	889.814	511.235	576.083	503.551	519.761	412.871	451.992	410.114	423.624	598.002	399.476	4	41465150	41480926	+	protein_coding	Nudt2
ENSMUSG00000057604	647.196	-0.838867	0.125876	-6.66425	2.66e-11	3.71e-10	6	112273757	112330425	+	protein_coding	Lmcd1	ENSMUSG00000057604	826.933	735.888	775.457	1037.2	1065.89	998.741	896.681	635.631	542.833	854.898	612.827	586.732	511.067	420.577	355.325	339.175	392.485	394.766	574.263	386.56	6	112273757	112330425	+	protein_coding	Lmcd1
ENSMUSG00000113743	426.593	-0.838079	0.0903852	-9.2723	1.82e-20	9.68e-19	13	96376929	96377630	+	processed_pseudogene	Gm8712	ENSMUSG00000113743	447.637	486.521	632.844	643.654	562.356	546.391	595.013	589.121	553.911	434.77	287.297	342.881	353.237	354.773	274.03	276.981	293.204	298.961	336.871	221.418	13	96376929	96377630	+	processed_pseudogene	Gm8712
ENSMUSG00000009734	363.35	-0.837586	0.159508	-5.25107	1.51e-07	1.13e-06	13	18121097	18397686	-	protein_coding	Pou6f2	ENSMUSG00000009734	367.336	397.97	319.764	455.155	501.179	657.097	575.249	473.255	448.668	528.257	473.002	368.438	232.047	200.275	144.322	202.492	271.863	206.618	262.262	181.748	13	18121097	18397686	-	protein_coding	Pou6f2
ENSMUSG00000030590	901.049	-0.836826	0.0791297	-10.5754	3.88e-26	4.17e-24	7	29152509	29156234	-	protein_coding	Fam98c	ENSMUSG00000030590	1190	1129.79	1108.59	1232.14	1192.95	1260.63	1235.8	1061.56	1040.43	1133.11	775.592	783.729	660.441	685.703	501.474	566.256	558.572	756.058	604.785	543.398	7	29152509	29156234	-	protein_coding	Fam98c
ENSMUSG00000030862	211.583	-0.83642	0.101339	-8.25364	1.54e-16	4.78e-15	7	132032686	132154739	-	protein_coding	Cpxm2	ENSMUSG00000030862	249.447	252.421	308.623	293.322	295.296	252.364	300.627	252.947	270.493	250.049	207.553	184.219	164.406	149.729	99.5641	128.004	151.241	135.052	122.087	164.219	7	132032686	132154739	-	protein_coding	Cpxm2
ENSMUSG00000085019	1.23092	-0.836095	0.305903	-2.7332	0.0062722	0.0173586	1	62131194	62136109	-	lncRNA	Pard3bos2	ENSMUSG00000085019	0	2.03565	1.11416	4.59753	1.17648	0	4.16093	4.89574	1.84637	2.25269	1.09238	0	0	0	0	1.44637	0	0	0	0	1	62131194	62136109	-	lncRNA	Pard3bos2
ENSMUSG00000083859	1.10415	-0.835737	0.302947	-2.75869	0.00580344	0.0162169	11	12936833	12937938	-	processed_pseudogene	Gm12003	ENSMUSG00000083859	1.70854	4.0713	2.22832	3.67802	2.35295	2.38079	0	1.63191	1.84637	0	2.18477	0	0	0	0	0	0	0	0	0	11	12936833	12937938	-	processed_pseudogene	Gm12003
ENSMUSG00000117244	2.06611	-0.83544	0.321174	-2.60121	0.00928958	0.0245156	17	53196450	53198567	+	processed_pseudogene	Gm9210	ENSMUSG00000117244	1.70854	4.0713	2.22832	3.67802	9.41182	7.14236	2.08047	1.63191	0	2.25269	0	0	0	3.81476	0	1.44637	1.85572	0	0	0	17	53196450	53198567	+	processed_pseudogene	Gm9210
ENSMUSG00000067702	5.62732	-0.834989	0.310548	-2.68876	0.00717186	0.0195661	6	125278273	125286042	-	protein_coding	Tuba3a	ENSMUSG00000067702	4.27135	2.03565	8.91329	12.8731	11.7648	5.95197	12.4828	4.89574	9.23185	7.88443	0	4.25939	4.6973	0.95369	1.82686	7.23187	5.56716	0	6.78263	0.922577	6	125278273	125286042	-	protein_coding	Tuba3a
ENSMUSG00000076493	3.39593	-0.834066	0.32528	-2.56415	0.0103429	0.0268872	6	41542956	41543007	+	TR_J_gene	Trbj2-2	ENSMUSG00000076493	6.83416	5.08913	12.2558	7.35605	4.70591	2.38079	3.1207	1.63191	3.69274	3.37904	7.64668	4.25939	0.939461	0	1.82686	0.723187	0	1.15429	0	0.922577	6	41542956	41543007	+	TR_J_gene	Trbj2-2
ENSMUSG00000096826	2.89124	-0.833939	0.323121	-2.58089	0.00985467	0.0257869	4	42655250	42655998	+	protein_coding	Ccl27b	ENSMUSG00000096826	5.97989	4.0713	4.45665	2.75852	1.17648	3.57118	3.1207	8.97553	2.76955	5.63174	4.36953	0	3.75784	0	0.913432	1.44637	0.92786	0	1.13044	2.76773	4	42655250	42655998	+	protein_coding	Ccl27b
ENSMUSG00000028937	17973.4	-0.833295	0.0698703	-11.9263	8.63e-33	1.93e-30	4	152178133	152271855	+	protein_coding	Acot7	ENSMUSG00000028937	22251.2	23393.7	23132.2	22307.2	25196.6	23173.4	24488.1	23875.7	21843.5	21139.3	15783.8	15161.3	13206.9	14050.7	12375.2	11866.1	9956.86	13416.3	11626.6	11224.1	4	152178133	152271855	+	protein_coding	Acot7
ENSMUSG00000108077	129.466	-0.833127	0.196373	-4.24257	2.21e-05	0.000109011	6	77380259	77382459	-	TEC	6330415B21Rik	ENSMUSG00000108077	58.0903	112.979	123.672	207.808	135.295	245.221	312.07	165.639	202.177	132.909	97.2221	140.56	72.3385	83.9247	54.8059	85.3361	63.0945	105.04	106.261	84.8771	6	77380259	77382459	-	TEC	6330415B21Rik
ENSMUSG00000037438	29.1827	-0.833115	0.170057	-4.89903	9.63e-07	6.16e-06	15	99898288	99898556	-	processed_pseudogene	Uqcrh-ps1	ENSMUSG00000037438	34.1708	32.5704	33.4249	45.0558	40.0002	41.6638	52.0116	41.6138	31.3883	27.0323	21.8477	17.0376	20.6681	28.6107	17.3552	14.4637	18.5572	32.3201	13.5653	20.2967	15	99898288	99898556	-	processed_pseudogene	Uqcrh-ps1
ENSMUSG00000114040	3.19706	-0.832418	0.325613	-2.55646	0.0105743	0.0274017	12	18013611	18013714	+	unprocessed_pseudogene	Gm48319	ENSMUSG00000114040	1.70854	2.03565	4.45665	6.43654	1.17648	7.14236	4.16093	4.89574	11.0782	4.50539	6.5543	4.25939	0	0	1.82686	0.723187	0.92786	0	1.13044	0.922577	12	18013611	18013714	+	unprocessed_pseudogene	Gm48319
ENSMUSG00000090071	70110.4	-0.832234	0.0907796	-9.16764	4.83e-20	2.41e-18	1	74854933	74857732	+	protein_coding	Cdk5r2	ENSMUSG00000090071	101857	83022	85731.4	92279.8	88565.2	97136.1	92530.8	87058.5	84545.3	88903.7	67474.3	61076.5	45778	51630.9	38269.1	45137	36032.5	57646.3	52288.4	45244.1	1	74854933	74857732	+	protein_coding	Cdk5r2
ENSMUSG00000109846	3.91641	-0.831768	0.318923	-2.60805	0.00910585	0.0240775	8	34658105	34659369	-	lncRNA	Gm45627	ENSMUSG00000109846	4.27135	4.0713	5.57081	7.35605	9.41182	8.33276	7.28163	6.52766	3.69274	0	2.18477	0	2.81838	0	0	1.44637	3.71144	2.30858	5.65219	3.69031	8	34658105	34659369	-	lncRNA	Gm45627
ENSMUSG00000045731	612.723	-0.831446	0.103914	-8.00132	1.23e-15	3.37e-14	14	65400672	65425472	-	protein_coding	Pnoc	ENSMUSG00000045731	897.837	867.188	701.922	661.125	780.004	948.744	805.14	747.417	802.248	673.556	557.115	575.018	396.452	458.725	428.4	311.694	314.544	509.041	391.132	427.153	14	65400672	65425472	-	protein_coding	Pnoc
ENSMUSG00000036699	4037.9	-0.831185	0.188744	-4.40378	1.06e-05	5.55e-05	X	36195903	36199158	+	protein_coding	Zcchc12	ENSMUSG00000036699	2820.8	5190.91	5752.42	4981.88	6014.15	3768.79	5585.01	7255.49	7803.68	3604.31	1930.24	2267.06	4863.59	2690.36	3524.93	3712.12	2821.62	2153.9	1951.14	2065.65	X	36195903	36199158	+	protein_coding	Zcchc12
ENSMUSG00000104524	135.406	-0.831154	0.167803	-4.95316	7.3e-07	4.78e-06	1	135523087	135525338	-	TEC	Gm37333	ENSMUSG00000104524	70.0501	150.638	196.092	141.604	132.942	185.701	249.656	214.597	257.569	162.194	121.254	97.9661	111.796	102.045	56.6328	110.648	87.2188	106.194	71.2176	82.1093	1	135523087	135525338	-	TEC	Gm37333
ENSMUSG00000083748	2.77736	-0.831072	0.32423	-2.56322	0.0103706	0.0269447	11	104679104	104680655	-	processed_pseudogene	Gm11662	ENSMUSG00000083748	1.70854	0	10.0275	9.19506	4.70591	7.14236	6.2414	3.26383	1.84637	0	3.27715	2.1297	0	0	0	0	1.85572	2.30858	0	1.84515	11	104679104	104680655	-	processed_pseudogene	Gm11662
ENSMUSG00000032609	3121.15	-0.830468	0.0702389	-11.8235	2.95e-32	6.27e-30	9	108447635	108461581	-	protein_coding	Klhdc8b	ENSMUSG00000032609	3644.31	3958.33	4738.53	4017.32	4021.2	3724.74	4463.64	4157.3	3887.53	3438.74	2587.85	2311.79	2488.63	2400.44	2089.93	2195.6	2110.88	2458.63	1768.01	1959.55	9	108447635	108461581	-	protein_coding	Klhdc8b
ENSMUSG00000029546	13.2011	-0.830465	0.316649	-2.62267	0.00872436	0.0231851	5	139543493	139548179	+	protein_coding	Uncx	ENSMUSG00000029546	0	20.3565	13.3699	4.59753	11.7648	9.52315	26.0058	70.9883	59.0838	4.50539	4.36953	4.25939	13.1524	0	7.30746	7.95506	0	0	6.78263	0	5	139543493	139548179	+	protein_coding	Uncx
ENSMUSG00000003072	11576.5	-0.830167	0.069559	-11.9347	7.8e-33	1.78e-30	10	80138631	80145818	+	protein_coding	Atp5d	ENSMUSG00000003072	12482.6	14195.6	14210	15848.6	16290.7	16508.4	16157.9	15710.4	13375.1	13755	9526.67	9998.93	8064.33	8148.33	7610.71	7597.81	7043.38	9066.93	8497.51	7440.58	10	80138631	80145818	+	protein_coding	Atp5d
ENSMUSG00000075010	19.3307	-0.830053	0.254127	-3.26629	0.00108965	0.00368747	19	11047611	11055808	-	lncRNA	AW112010	ENSMUSG00000075010	11.9598	42.7487	38.9957	18.3901	14.1177	36.9022	36.4081	14.6872	25.8492	19.1479	2.18477	21.297	9.39461	15.259	14.6149	10.8478	13.9179	6.92573	23.7392	9.22577	19	11047611	11055808	-	lncRNA	AW112010
ENSMUSG00000082078	61.4066	-0.829716	0.2022	-4.10345	4.07e-05	0.000189654	11	30568181	30568898	-	processed_pseudogene	Gm12098	ENSMUSG00000082078	20.5025	90.5865	66.8497	62.5264	68.2357	148.799	100.903	78.3319	102.474	66.4545	34.9562	63.8909	36.639	40.055	25.5761	45.5608	38.0423	47.3258	45.2175	45.2063	11	30568181	30568898	-	processed_pseudogene	Gm12098
ENSMUSG00000084202	58.1222	-0.829469	0.238914	-3.47184	0.00051691	0.00188415	X	77289831	77290815	-	processed_pseudogene	Gm5398	ENSMUSG00000084202	18.7939	45.8022	57.9364	79.0775	91.7652	140.466	126.908	62.0127	76.6243	73.2126	64.4506	47.9182	18.7892	60.0825	23.7492	44.1144	24.1244	54.2515	33.9132	18.4515	X	77289831	77290815	-	processed_pseudogene	Gm5398
ENSMUSG00000091133	28.0929	-0.828597	0.206603	-4.01058	6.06e-05	0.00027175	13	69610497	69614901	-	lncRNA	Gm17108	ENSMUSG00000091133	49.5476	43.7665	46.7948	22.9876	30.5884	27.3791	11.4426	48.1415	51.6984	36.0431	18.5705	24.4915	16.9103	20.0275	10.9612	22.4188	17.6293	21.9315	14.6957	25.8321	13	69610497	69614901	-	lncRNA	Gm17108
ENSMUSG00000003559	663.494	-0.828473	0.100004	-8.28438	1.19e-16	3.75e-15	19	46707457	46741099	+	protein_coding	As3mt	ENSMUSG00000003559	730.401	829.528	880.188	924.103	944.711	691.619	877.957	848.595	978.576	822.233	589.887	597.38	520.461	426.3	378.161	349.3	388.773	443.246	609.306	439.147	19	46707457	46741099	+	protein_coding	As3mt
ENSMUSG00000068617	245.622	-0.828448	0.109497	-7.56598	3.85e-14	8.3e-13	16	14906605	14981371	+	protein_coding	Efcab1	ENSMUSG00000068617	245.175	307.383	397.756	416.536	275.296	302.36	296.466	350.862	313.883	256.807	125.624	212.97	205.742	174.525	190.907	188.752	166.087	139.669	198.957	146.69	16	14906605	14981371	+	protein_coding	Efcab1
ENSMUSG00000042770	1241.01	-0.82817	0.11113	-7.45228	9.17e-14	1.87e-12	6	135137521	135198022	-	protein_coding	Hebp1	ENSMUSG00000042770	1119.95	1503.33	2123.59	1813.27	1787.07	1501.09	1613.4	1626.2	1687.58	1200.69	1079.27	1192.63	900.003	877.395	749.014	645.083	935.283	741.053	958.612	765.739	6	135137521	135198022	-	protein_coding	Hebp1
ENSMUSG00000045055	498.352	-0.827934	0.100648	-8.22604	1.93e-16	5.94e-15	10	128776370	128777250	-	processed_pseudogene	Rpsa-ps2	ENSMUSG00000045055	458.743	549.626	622.816	753.995	723.533	764.233	777.054	633.999	606.532	516.993	348.47	445.107	399.271	392.92	327.009	323.988	306.194	376.298	366.262	274.005	10	128776370	128777250	-	processed_pseudogene	Rpsa-ps2
ENSMUSG00000099741	5.01006	-0.82789	0.322479	-2.56727	0.0102503	0.0266814	1	51317527	51318552	-	processed_pseudogene	Gm5253	ENSMUSG00000099741	9.39697	1.01783	4.45665	1.83901	4.70591	14.2847	14.5633	6.52766	7.38548	9.01078	7.64668	0	0	0	1.82686	1.44637	6.49502	2.30858	4.52175	2.76773	1	51317527	51318552	-	processed_pseudogene	Gm5253
ENSMUSG00000023942	951.903	-0.827604	0.0821944	-10.0689	7.59e-24	6.23e-22	17	45585199	45599606	-	protein_coding	Slc29a1	ENSMUSG00000023942	1056.73	1304.85	1192.15	1239.49	1216.48	1127.3	1388.71	1103.17	1432.78	1156.76	748.282	718.773	876.517	679.027	542.579	742.713	675.482	602.538	698.611	535.095	17	45585199	45599606	-	protein_coding	Slc29a1
ENSMUSG00000089890	5.74996	-0.827475	0.318182	-2.60063	0.00930527	0.0245471	6	8354055	8364136	-	lncRNA	Gm16055	ENSMUSG00000089890	0	7.12478	8.91329	10.1146	10.5883	13.0943	10.4023	2.44787	13.8478	6.75808	5.46191	0	1.87892	1.90738	4.56716	5.06231	0.92786	0	4.52175	7.38061	6	8354055	8364136	-	lncRNA	Gm16055
ENSMUSG00000088359	14.5521	-0.827104	0.284897	-2.90317	0.0036941	0.0108754	5	23674288	23674381	-	rRNA	Gm24009	ENSMUSG00000088359	4.27135	13.2317	8.91329	18.3901	22.3531	41.6638	33.2875	23.6628	22.1564	11.2635	14.201	5.32424	11.2735	13.3517	6.39402	1.44637	15.7736	3.46286	6.78263	13.8387	5	23674288	23674381	-	rRNA	Gm24009
ENSMUSG00000085042	153.713	-0.826868	0.155747	-5.30903	1.1e-07	8.44e-07	5	135012113	135013253	-	transcribed_unitary_pseudogene	Abhd11os	ENSMUSG00000085042	140.1	157.763	106.96	249.186	309.413	201.177	198.684	226.836	213.256	188.1	114.7	106.485	162.527	100.137	88.6029	70.8724	144.746	99.2687	109.653	85.7996	5	135012113	135013253	-	transcribed_unitary_pseudogene	Abhd11os
ENSMUSG00000056829	3.16934	-0.826714	0.324762	-2.5456	0.0109091	0.0281618	19	16872318	16873805	-	protein_coding	Foxb2	ENSMUSG00000056829	0	4.0713	1.11416	1.83901	4.70591	4.76158	8.32186	9.79149	11.0782	4.50539	0	2.1297	0	0	3.65373	2.89275	0	0	4.52175	0	19	16872318	16873805	-	protein_coding	Foxb2
ENSMUSG00000114547	340.357	-0.826462	0.0807327	-10.237	1.35e-24	1.21e-22	13	112593742	112595084	-	processed_pseudogene	Gm3226	ENSMUSG00000114547	446.783	417.309	444.551	467.109	475.297	430.923	437.938	468.359	356.349	420.128	301.498	308.806	222.652	281.339	216.483	224.911	208.768	217.006	223.827	237.102	13	112593742	112595084	-	processed_pseudogene	Gm3226
ENSMUSG00000108352	9.91478	-0.826394	0.261545	-3.15966	0.00157951	0.00511938	7	30926667	30927147	-	unprocessed_pseudogene	Usf2-ps1	ENSMUSG00000108352	4.27135	22.3922	8.91329	18.3901	17.6472	13.0943	16.6437	8.15957	10.155	13.5162	8.73906	10.6485	6.57622	6.67583	6.39402	4.33912	5.56716	2.30858	10.1739	3.69031	7	30926667	30927147	-	unprocessed_pseudogene	Usf2-ps1
ENSMUSG00000027170	1650.88	-0.826307	0.0634079	-13.0316	8.09e-39	3.21e-36	2	104999655	105017080	-	protein_coding	Eif3m	ENSMUSG00000027170	1876.83	2000.03	2236.12	2292.33	2288.25	2083.19	2143.92	2291.21	1987.62	1958.72	1048.69	1130.87	1474.01	1139.66	1164.63	1324.88	1269.31	1085.03	1148.53	1073.88	2	104999655	105017080	-	protein_coding	Eif3m
ENSMUSG00000116652	382.033	-0.826156	0.100852	-8.19175	2.57e-16	7.76e-15	16	17833120	17835008	+	protein_coding	B830017H08Rik	ENSMUSG00000116652	457.034	378.631	464.605	476.304	608.239	615.434	537.8	434.089	457.9	483.203	281.835	247.045	240.502	280.385	365.373	317.479	249.594	264.332	287.131	193.741	16	17833120	17835008	+	protein_coding	B830017H08Rik
ENSMUSG00000109509	39.3301	-0.826073	0.181474	-4.55202	5.31e-06	2.95e-05	7	30484700	30485097	-	processed_pseudogene	Rps12-ps4	ENSMUSG00000109509	15.3769	53.9448	64.6214	45.9753	51.765	58.3293	60.3335	61.1968	44.3129	56.3174	34.9562	26.6212	27.2444	22.8886	17.3552	25.3116	25.9801	30.0115	37.3045	26.7547	7	30484700	30485097	-	processed_pseudogene	Rps12-ps4
ENSMUSG00000103532	60.0068	-0.825316	0.136984	-6.02488	1.69e-09	1.75e-08	2	129196085	129197126	-	TEC	Gm4430	ENSMUSG00000103532	63.216	61.0696	56.8222	83.675	57.6474	95.2315	99.8624	79.1478	80.3171	97.9922	49.1572	48.983	39.4573	55.314	43.8447	39.7753	37.1144	30.0115	41.8262	39.6708	2	129196085	129197126	-	TEC	Gm4430
ENSMUSG00000021492	41.7116	-0.824299	0.176024	-4.68288	2.83e-06	1.66e-05	13	55417957	55426793	-	protein_coding	F12	ENSMUSG00000021492	46.9848	37.6596	53.4798	42.2973	48.2356	65.4717	63.4542	75.0681	58.1607	52.9383	21.8477	9.58364	28.1838	34.3328	24.6627	43.3912	35.2587	39.2458	22.6088	31.3676	13	55417957	55426793	-	protein_coding	F12
ENSMUSG00000031491	12.9125	-0.824114	0.260892	-3.15883	0.00158403	0.00513109	8	27403211	27413944	-	protein_coding	Chrna6	ENSMUSG00000031491	15.3769	26.4635	13.3699	11.0341	11.7648	7.14236	27.0461	18.767	20.3101	21.4006	13.1086	14.9079	11.2735	5.72214	10.9612	1.44637	9.2786	9.2343	2.26088	7.38061	8	27403211	27413944	-	protein_coding	Chrna6
ENSMUSG00000109413	39.9939	-0.824078	0.238808	-3.4508	0.000558919	0.00202199	8	23696004	23697635	+	TEC	Gm45165	ENSMUSG00000109413	24.7738	36.6417	18.9407	72.641	43.5296	109.516	95.7014	54.6691	39.697	34.9168	26.2172	18.1024	19.7287	38.1476	13.7015	26.7579	26.9079	40.4001	19.2175	39.6708	8	23696004	23697635	+	TEC	Gm45165
ENSMUSG00000029149	186.68	-0.823926	0.145588	-5.65929	1.52e-08	1.34e-07	5	31251690	31253202	+	protein_coding	Krtcap3	ENSMUSG00000029149	348.542	264.635	229.517	219.762	175.295	242.84	234.052	217.045	259.415	219.638	150.749	238.526	152.193	157.359	97.7372	87.5057	105.776	106.194	109.653	117.167	5	31251690	31253202	+	protein_coding	Krtcap3
ENSMUSG00000036138	4382.58	-0.823496	0.0836656	-9.8427	7.37e-23	5.4e-21	9	119339675	119350299	+	protein_coding	Acaa1a	ENSMUSG00000036138	5660.39	5854.54	5607.58	5673.35	5321.21	5743.65	6073.92	5648.06	5305.54	5306.22	3612.51	4263.65	3147.19	3269.25	2458.05	2313.48	2818.84	3211.23	3526.97	2836	9	119339675	119350299	+	protein_coding	Acaa1a
ENSMUSG00000051515	530.875	-0.823137	0.0896492	-9.18176	4.24e-20	2.13e-18	7	93079864	93081867	+	protein_coding	Fam181b	ENSMUSG00000051515	492.914	703.318	705.264	760.431	828.24	710.665	717.761	623.391	694.235	573.311	389.981	448.301	432.152	391.967	332.489	285.659	413.825	371.681	392.262	349.657	7	93079864	93081867	+	protein_coding	Fam181b
ENSMUSG00000039349	4961.25	-0.82287	0.0918295	-8.96085	3.22e-19	1.41e-17	1	184871925	184883218	-	protein_coding	C130074G19Rik	ENSMUSG00000039349	6447.17	4768.51	6510.05	6973.53	6230.62	7582.81	7513.6	6015.24	5138.45	6475.37	4679.77	3692.89	3525.8	3439.01	3011.59	3171.9	3061.01	4410.53	3361.92	3215.18	1	184871925	184883218	-	protein_coding	C130074G19Rik
ENSMUSG00000109416	30.8848	-0.822601	0.196918	-4.17737	2.95e-05	0.000141679	7	6753042	6754464	+	TEC	Gm44863	ENSMUSG00000109416	16.2311	41.7309	34.539	58.8484	41.1767	39.283	66.5749	34.2702	38.7738	32.6641	25.1248	29.8158	21.6076	24.7959	24.6627	22.4188	12.99	11.5429	20.3479	20.2967	7	6753042	6754464	+	TEC	Gm44863
ENSMUSG00000031111	322.909	-0.822203	0.26401	-3.11429	0.00184388	0.0058625	X	49782535	49797749	-	protein_coding	Igsf1	ENSMUSG00000031111	153.769	468.2	315.308	297	540.003	172.607	434.817	801.27	936.11	221.89	173.689	141.625	465.972	175.479	280.424	270.472	181.861	116.583	161.653	149.457	X	49782535	49797749	-	protein_coding	Igsf1
ENSMUSG00000004415	665.861	-0.822139	0.169045	-4.86343	1.15e-06	7.28e-06	5	136741758	136883209	-	protein_coding	Col26a1	ENSMUSG00000004415	779.948	548.608	463.491	1235.82	938.829	824.943	871.715	1248.41	975.806	751.274	854.243	654.882	425.576	437.744	453.062	296.507	373.928	479.029	403.566	299.837	5	136741758	136883209	-	protein_coding	Col26a1
ENSMUSG00000007039	1123.56	-0.821496	0.103134	-7.96533	1.65e-15	4.41e-14	17	35059034	35062095	+	protein_coding	Ddah2	ENSMUSG00000007039	1037.08	1483.99	1825	1542.01	1807.07	1537.99	1540.58	1201.9	1287.84	1168.02	796.347	843.36	1024.95	910.774	697.862	841.067	862.91	759.521	593.48	709.462	17	35059034	35062095	+	protein_coding	Ddah2
ENSMUSG00000026826	1859.15	-0.821356	0.139938	-5.86943	4.37e-09	4.22e-08	2	57106829	57124003	-	protein_coding	Nr4a2	ENSMUSG00000026826	2370.6	2374.59	2221.64	2308.88	2658.84	2495.07	2156.4	2941.53	2223.95	2241.43	1009.36	1473.75	1285.18	1139.66	2812.46	1254.73	977.036	1083.88	1183.57	970.551	2	57106829	57124003	-	protein_coding	Nr4a2
ENSMUSG00000030834	197.116	-0.821119	0.196704	-4.17439	2.99e-05	0.000143314	7	45967554	46030302	-	protein_coding	Abcc6	ENSMUSG00000030834	550.15	281.938	305.28	151.718	158.824	204.748	290.225	112.602	275.109	244.417	187.89	143.755	120.251	189.784	94.0835	134.513	144.746	70.4116	113.044	168.832	7	45967554	46030302	-	protein_coding	Abcc6
ENSMUSG00000068184	1093.33	-0.82097	0.0998503	-8.22201	2e-16	6.12e-15	13	108002714	108158623	-	protein_coding	Ndufaf2	ENSMUSG00000068184	1108.84	1343.53	1283.51	1370.06	1596.48	1711.79	1695.58	1651.5	1248.15	1021.6	1006.08	927.483	817.331	770.582	646.71	656.654	675.482	750.287	812.785	772.197	13	108002714	108158623	-	protein_coding	Ndufaf2
ENSMUSG00000105828	210.117	-0.820526	0.264267	-3.10491	0.00190338	0.00602671	5	49217300	49217688	-	TEC	Gm43048	ENSMUSG00000105828	51.2562	184.227	163.782	355.849	187.06	540.439	624.14	236.628	243.721	236.533	155.118	257.693	99.5828	123.98	83.1223	96.1839	165.159	98.1145	130	169.754	5	49217300	49217688	-	TEC	Gm43048
ENSMUSG00000104871	311.434	-0.820189	0.166318	-4.93144	8.16e-07	5.3e-06	5	57945041	57946912	+	TEC	Gm42639	ENSMUSG00000104871	188.794	306.366	372.13	550.784	330.59	598.768	580.45	382.684	399.739	325.514	289.481	239.591	188.832	230.793	137.928	136.682	177.221	283.955	261.131	247.251	5	57945041	57946912	+	TEC	Gm42639
ENSMUSG00000116735	134.288	-0.820103	0.158029	-5.18957	2.11e-07	1.52e-06	16	81290161	81292956	+	TEC	Gm49555	ENSMUSG00000116735	66.633	163.87	115.873	181.143	192.942	277.362	234.052	164.823	168.02	174.584	77.5592	100.096	102.401	115.397	91.3432	90.3984	101.137	100.423	79.1307	88.5674	16	81290161	81292956	+	TEC	Gm49555
ENSMUSG00000107035	171.599	-0.82007	0.118557	-6.91708	4.61e-12	7.26e-11	6	37686238	37687195	-	processed_pseudogene	Ybx1-ps2	ENSMUSG00000107035	251.155	227.993	226.175	246.428	263.531	197.605	228.851	195.83	194.792	175.71	145.287	153.338	123.069	158.313	95.9104	141.745	133.612	101.577	72.3481	98.7157	6	37686238	37687195	-	processed_pseudogene	Ybx1-ps2
ENSMUSG00000052374	1779.54	-0.819202	0.120964	-6.77229	1.27e-11	1.86e-10	13	12269425	12340760	-	protein_coding	Actn2	ENSMUSG00000052374	1584.67	2585.28	1887.39	2166.36	2735.31	2029.62	2357.17	2197.37	2932.96	2411.51	1292.29	1629.22	1713.58	1219.77	793.772	1169.39	1578.29	1238.55	1082.96	985.312	13	12269425	12340760	-	protein_coding	Actn2
ENSMUSG00000082203	5.82686	-0.818778	0.301677	-2.71409	0.00664586	0.0182788	12	108440529	108441270	-	processed_pseudogene	Gm15636	ENSMUSG00000082203	2.56281	11.1961	6.68497	14.7121	1.17648	9.52315	7.28163	11.4234	11.0782	5.63174	1.09238	5.32424	1.87892	5.72214	0.913432	6.50869	5.56716	2.30858	2.26088	3.69031	12	108440529	108441270	-	processed_pseudogene	Gm15636
ENSMUSG00000046717	24.2611	-0.8181	0.215565	-3.79514	0.000147559	0.000609989	6	138657088	138658544	-	protein_coding	Igbp1b	ENSMUSG00000046717	30.7537	24.4278	26.7399	38.6193	32.9414	16.6655	54.0921	31.0064	40.6201	22.5269	15.2934	10.6485	22.5471	14.3054	16.4418	21.6956	17.6293	9.2343	31.6523	7.38061	6	138657088	138658544	-	protein_coding	Igbp1b
ENSMUSG00000024925	1210.6	-0.818095	0.106627	-7.67249	1.69e-14	3.92e-13	19	5601872	5607019	+	protein_coding	Rnaseh2c	ENSMUSG00000024925	1113.97	1490.1	1605.51	1766.37	1995.3	1793.92	1489.61	1645.79	1454.94	1181.54	987.514	1115.96	713.051	891.7	829.396	609.647	951.056	928.047	726.872	921.654	19	5601872	5607019	+	protein_coding	Rnaseh2c
ENSMUSG00000044576	1260.19	-0.816702	0.0791653	-10.3164	5.94e-25	5.54e-23	5	30105160	30118378	+	protein_coding	Garem2	ENSMUSG00000044576	1623.11	1760.84	1563.17	1620.17	1634.13	1541.56	1503.14	1422.21	1838.06	1618.56	1068.35	1146.84	1082.26	726.712	834.877	818.648	917.653	861.099	740.437	881.983	5	30105160	30118378	+	protein_coding	Garem2
ENSMUSG00000057766	1413.26	-0.816605	0.106893	-7.63949	2.18e-14	4.95e-13	18	12252361	12305797	-	protein_coding	Ankrd29	ENSMUSG00000057766	1797.38	1864.66	1642.27	1771.89	1869.42	2077.24	1882.82	1941.16	1618.34	1663.61	1285.73	1364.07	1096.35	939.385	687.814	783.212	770.124	1089.65	1274	846.003	18	12252361	12305797	-	protein_coding	Ankrd29
ENSMUSG00000115912	53.5981	-0.816602	0.164471	-4.96501	6.87e-07	4.52e-06	15	100825678	100832391	-	lncRNA	Gm35569	ENSMUSG00000115912	73.4672	59.0339	77.9913	71.7215	45.8826	63.0909	67.6151	66.0925	62.7766	104.75	67.7277	36.2049	45.0941	40.055	21.9224	28.9275	37.1144	34.6286	42.9567	24.9096	15	100825678	100832391	-	lncRNA	Gm35569
ENSMUSG00000030030	2390.35	-0.816571	0.0956787	-8.53451	1.41e-17	5.06e-16	6	83156403	83162945	+	protein_coding	1700003E16Rik	ENSMUSG00000030030	2925.87	3081.98	3106.28	3161.26	3085.9	3364.05	3211.2	3057.39	2930.19	2704.36	2176.03	2441.7	1728.61	1557.38	1438.66	1352.36	1364.88	1731.43	2011.05	1376.48	6	83156403	83162945	+	protein_coding	1700003E16Rik
ENSMUSG00000110529	98.1698	-0.816237	0.150957	-5.40709	6.41e-08	5.09e-07	8	71983902	71987153	+	TEC	Gm45694	ENSMUSG00000110529	120.452	120.103	113.644	126.892	127.06	154.751	108.184	103.627	170.789	123.898	50.2496	34.0752	110.856	77.2489	65.7671	79.5506	97.4253	61.1772	67.8263	49.8191	8	71983902	71987153	+	TEC	Gm45694
ENSMUSG00000118376	11.8983	-0.815892	0.302326	-2.69872	0.00696067	0.0190546	18	66504177	66511745	+	lncRNA	Gm9926	ENSMUSG00000118376	11.9598	19.3387	11.1416	18.3901	35.2943	19.0463	20.8047	6.52766	6.46229	15.7689	17.4781	10.6485	2.81838	2.86107	1.82686	4.33912	1.85572	8.08001	21.4783	1.84515	18	66504177	66511745	+	lncRNA	Gm9926
ENSMUSG00000031750	4058.01	-0.81509	0.0725972	-11.2276	2.99e-29	4.61e-27	8	110741828	110805924	-	protein_coding	Il34	ENSMUSG00000031750	5575.82	5006.69	5442.68	5098.66	5227.09	5071.08	5242.77	5380.42	4723.01	5109.11	3698.81	3403.26	2942.39	3110.94	2428.82	2846.47	2350.27	3092.34	3003.57	2406.08	8	110741828	110805924	-	protein_coding	Il34
ENSMUSG00000033007	1592.09	-0.814951	0.141792	-5.74749	9.06e-09	8.25e-08	1	75450435	75474343	+	protein_coding	Asic4	ENSMUSG00000033007	1031.1	2177.13	1606.62	2088.2	2651.78	1734.4	2168.89	2123.12	3090.82	1847.21	868.444	1104.25	1687.27	1086.25	992.9	1447.1	1207.15	1051.56	1054.7	822.938	1	75450435	75474343	+	protein_coding	Asic4
ENSMUSG00000104646	6.18139	-0.814783	0.297843	-2.73561	0.00622639	0.0172446	3	95415025	95415425	-	processed_pseudogene	Gm9173	ENSMUSG00000104646	3.41708	2.03565	6.68497	12.8731	11.7648	11.9039	8.32186	13.0553	11.0782	4.50539	2.18477	6.38909	5.63676	5.72214	7.30746	2.89275	1.85572	2.30858	0	3.69031	3	95415025	95415425	-	processed_pseudogene	Gm9173
ENSMUSG00000067341	1.60678	-0.814729	0.314733	-2.58864	0.00963562	0.0253019	17	34325664	34341412	+	protein_coding	H2-Eb2	ENSMUSG00000067341	0	4.0713	2.22832	5.51704	7.05886	2.38079	2.08047	1.63191	0	2.25269	0	2.1297	0.939461	0	0	0	0	0	0	1.84515	17	34325664	34341412	+	protein_coding	H2-Eb2
ENSMUSG00000113031	47.3178	-0.813998	0.187683	-4.33709	1.44e-05	7.37e-05	12	74314200	74317162	-	lncRNA	Gm34552	ENSMUSG00000113031	39.2964	46.82	44.5665	61.6069	68.2357	96.4219	85.2991	46.5096	60.007	67.5808	28.402	54.3073	44.1546	36.2402	35.6238	23.142	43.6094	17.3143	26.0001	21.2193	12	74314200	74317162	-	lncRNA	Gm34552
ENSMUSG00000112571	8.15122	-0.813864	0.30715	-2.64973	0.0080557	0.0216381	10	105532983	105534493	-	TEC	Gm48207	ENSMUSG00000112571	3.41708	5.08913	1.11416	27.5852	16.4707	14.2847	11.4426	9.79149	15.6941	9.01078	2.18477	4.25939	2.81838	9.5369	0	3.61594	6.49502	9.2343	4.52175	6.45804	10	105532983	105534493	-	TEC	Gm48207
ENSMUSG00000070167	21.5661	-0.813376	0.193156	-4.21097	2.54e-05	0.000123989	19	8888537	8888685	-	snoRNA	Snora57	ENSMUSG00000070167	19.6482	17.303	37.8815	26.6657	31.7649	30.9502	40.5691	24.4787	25.8492	25.906	15.2934	20.2321	16.9103	20.0275	10.0478	11.571	16.7015	9.2343	19.2175	11.0709	19	8888537	8888685	-	snoRNA	Snora57
ENSMUSG00000113966	15.4012	-0.813315	0.245069	-3.31871	0.000904333	0.00311758	12	108960911	108963832	+	TEC	Gm47980	ENSMUSG00000113966	22.211	41.7309	13.3699	16.5511	15.2942	20.2367	22.8851	19.583	18.4637	13.5162	4.36953	9.58364	3.75784	19.0738	8.22089	5.7855	16.7015	16.16	11.3044	9.22577	12	108960911	108963832	+	TEC	Gm47980
ENSMUSG00000034881	74.4651	-0.813168	0.157302	-5.16947	2.35e-07	1.68e-06	10	81328730	81335172	+	protein_coding	Tbxa2r	ENSMUSG00000034881	89.6983	63.1052	102.503	97.4676	75.2945	126.182	122.747	90.5712	104.32	90.1078	45.8801	76.6691	59.186	57.2214	33.797	59.3014	62.1666	33.4743	70.0872	29.5225	10	81328730	81335172	+	protein_coding	Tbxa2r
ENSMUSG00000023020	4770.42	-0.812443	0.100337	-8.09711	5.63e-16	1.62e-14	15	99725646	99729532	+	protein_coding	Cox14	ENSMUSG00000023020	5144.41	5781.25	6319.53	6001.62	6617.68	6670.97	6568.03	6585.59	5668.36	5738.74	4328.02	4734.32	4003.98	3243.5	2752.17	2709.78	2660.17	3334.74	3883.06	2662.56	15	99725646	99729532	+	protein_coding	Cox14
ENSMUSG00000060962	104.655	-0.812345	0.211468	-3.84146	0.000122306	0.000514161	7	30763755	30781063	+	protein_coding	Dmkn	ENSMUSG00000060962	105.929	134.353	115.873	169.189	247.06	144.038	118.587	109.338	137.555	86.7287	148.564	133.106	35.6995	67.712	34.7104	47.0072	51.9602	83.1087	74.6089	47.974	7	30763755	30781063	+	protein_coding	Dmkn
ENSMUSG00000022832	5.74838	-0.812259	0.324455	-2.50346	0.0122987	0.031266	16	34649920	34678618	+	protein_coding	Ropn1	ENSMUSG00000022832	13.6683	4.0713	8.91329	12.8731	7.05886	0	12.4828	12.2394	1.84637	11.2635	1.09238	6.38909	1.87892	7.62952	0	0	3.71144	0	3.39132	6.45804	16	34649920	34678618	+	protein_coding	Ropn1
ENSMUSG00000115512	1.78108	-0.811656	0.317828	-2.55376	0.0106568	0.0275866	14	103010245	103010786	+	processed_pseudogene	Rpl17-ps7	ENSMUSG00000115512	1.70854	0	4.45665	1.83901	0	4.76158	2.08047	4.07979	6.46229	4.50539	0	0	0	1.90738	0	2.89275	0.92786	0	0	0	14	103010245	103010786	+	processed_pseudogene	Rpl17-ps7
ENSMUSG00000059674	1196.18	-0.8116	0.0833579	-9.73633	2.11e-22	1.47e-20	14	54631230	54641364	-	protein_coding	Cdh24	ENSMUSG00000059674	1584.67	2011.22	1335.88	1362.71	1465.89	1445.14	1371.03	1546.24	1704.2	1465.38	903.401	924.289	1024.01	1038.57	696.949	907.6	765.484	834.55	754.002	782.345	14	54631230	54641364	-	protein_coding	Cdh24
ENSMUSG00000021631	312.192	-0.811527	0.105897	-7.66333	1.81e-14	4.17e-13	17	53866714	53867020	-	processed_pseudogene	Mrps36-ps1	ENSMUSG00000021631	437.386	405.095	451.235	433.087	370.59	399.972	419.214	351.678	326.807	403.232	341.916	271.536	234.865	237.469	187.254	209.724	156.808	185.84	222.696	197.431	17	53866714	53867020	-	processed_pseudogene	Mrps36-ps1
ENSMUSG00000063430	4735.55	-0.81141	0.0606697	-13.3742	8.55e-41	3.85e-38	5	113490332	113589725	+	protein_coding	Wscd2	ENSMUSG00000063430	6514.66	5691.68	5920.66	5780.01	5651.8	5553.19	6108.25	6209.43	6949.74	6060.87	3519.66	3255.24	3790.72	3064.21	3592.53	4063.59	2966.37	3578.29	3444.45	2995.61	5	113490332	113589725	+	protein_coding	Wscd2
ENSMUSG00000042655	14.1512	-0.81128	0.30383	-2.67018	0.007581	0.0205264	13	104845282	104863893	-	protein_coding	Shisal2b	ENSMUSG00000042655	13.6683	18.3209	21.1691	9.19506	9.41182	30.9502	16.6437	41.6138	31.3883	4.50539	8.73906	4.25939	18.7892	17.1664	16.4418	1.44637	5.56716	0	4.52175	9.22577	13	104845282	104863893	-	protein_coding	Shisal2b
ENSMUSG00000085718	6.59773	-0.811239	0.301443	-2.69119	0.00711978	0.0194382	11	53501183	53501759	+	processed_pseudogene	Rpl9-ps3	ENSMUSG00000085718	5.97989	8.14261	11.1416	11.9536	10.5883	7.14236	9.3621	20.3989	6.46229	0	4.36953	8.51879	3.75784	0	3.65373	5.06231	5.56716	4.61715	3.39132	1.84515	11	53501183	53501759	+	processed_pseudogene	Rpl9-ps3
ENSMUSG00000054312	1958.87	-0.810789	0.0997448	-8.12864	4.34e-16	1.26e-14	3	95862633	95871519	-	protein_coding	Mrps21	ENSMUSG00000054312	1965.67	2362.37	2711.87	2654.61	2608.25	2701	2930.34	2650.23	2259.03	2230.17	1756.55	1969.97	1360.34	1450.56	1096.12	1140.47	1135.7	1426.7	1573.57	1193.81	3	95862633	95871519	-	protein_coding	Mrps21
ENSMUSG00000034932	1132.87	-0.810237	0.0832561	-9.73186	2.21e-22	1.53e-20	10	81264712	81266934	-	protein_coding	Mrpl54	ENSMUSG00000034932	1196.83	1399.51	1372.65	1473.97	1608.24	1537.99	1749.67	1486.67	1418.01	1231.1	967.851	979.661	919.732	748.647	747.187	698.599	681.049	857.636	894.177	688.242	10	81264712	81266934	-	protein_coding	Mrpl54
ENSMUSG00000020331	12235.3	-0.810023	0.0558298	-14.5088	1.07e-47	8.18e-45	10	79716633	79736108	+	protein_coding	Hcn2	ENSMUSG00000020331	15537.5	15245	13259.6	15274.8	16560.1	16451.2	16489.8	15218.4	16832.4	15187.7	10375.5	9468.63	9295.96	8253.24	8302.18	8497.45	7971.24	9573.66	9024.29	7887.11	10	79716633	79736108	+	protein_coding	Hcn2
ENSMUSG00000098222	4.73111	-0.809984	0.326563	-2.48033	0.0131262	0.0330929	15	18163880	18164752	+	processed_pseudogene	Gm8318	ENSMUSG00000098222	0	6.10696	4.45665	9.19506	7.05886	4.76158	14.5633	0	12.0014	13.5162	2.18477	6.38909	3.75784	1.90738	0	0	0	4.61715	2.26088	1.84515	15	18163880	18164752	+	processed_pseudogene	Gm8318
ENSMUSG00000043441	224.619	-0.809957	0.283025	-2.86179	0.00421257	0.0122112	3	62529076	62605140	-	protein_coding	Gpr149	ENSMUSG00000043441	101.658	324.686	286.34	365.963	451.767	179.749	333.915	258.658	562.22	186.974	73.1896	110.744	346.661	97.2764	47.4985	357.255	167.015	76.183	82.522	82.1093	3	62529076	62605140	-	protein_coding	Gpr149
ENSMUSG00000037060	767.675	-0.809112	0.0695026	-11.6415	2.54e-31	4.89e-29	7	105480082	105482300	-	protein_coding	Cavin3	ENSMUSG00000037060	1025.12	972.024	1078.51	1013.3	997.652	968.981	1070.4	894.289	851.177	924.731	649.968	701.735	567.434	510.224	530.704	529.373	540.942	567.91	469.132	489.888	7	105480082	105482300	-	protein_coding	Cavin3
ENSMUSG00000092090	581.021	-0.809058	0.157329	-5.14247	2.71e-07	1.92e-06	6	28981633	29028922	+	lncRNA	Gm3294	ENSMUSG00000092090	1062.71	863.116	746.488	507.567	598.827	605.911	845.709	820.037	626.843	817.728	553.838	490.895	418.06	538.835	265.809	326.881	319.184	630.241	203.479	378.256	6	28981633	29028922	+	lncRNA	Gm3294
ENSMUSG00000053310	281731	-0.808974	0.125207	-6.46112	1.04e-10	1.31e-09	9	37544491	37552904	-	protein_coding	Nrgn	ENSMUSG00000053310	365901	306077	334588	422575	343875	440085	441021	333160	281799	346996	298383	272335	160878	198486	141319	156348	141247	221369	245893	182285	9	37544491	37552904	-	protein_coding	Nrgn
ENSMUSG00000059895	8150.91	-0.808965	0.0552939	-14.6303	1.8e-48	1.48e-45	15	73723144	73758766	+	protein_coding	Ptp4a3	ENSMUSG00000059895	11229.4	10716.7	9892.64	9552.75	10774.2	10483.8	10292.1	9586.68	10372.9	11031.4	6844.87	6431.69	6331.96	6544.22	5560.97	5498.39	5398.29	5900.72	5298.36	5276.22	15	73723144	73758766	+	protein_coding	Ptp4a3
ENSMUSG00000022490	7518.94	-0.808771	0.0848245	-9.53463	1.5e-21	9.41e-20	15	103530278	103538003	-	protein_coding	Ppp1r1a	ENSMUSG00000022490	7470.59	7705.96	10179	10242.4	9851.82	11537.3	12069.8	9947.33	9380.48	7685.07	6069.28	5314.66	5209.31	6448.85	4955.37	5215.63	5191.38	5906.49	4972.8	5025.28	15	103530278	103538003	-	protein_coding	Ppp1r1a
ENSMUSG00000026785	83.5737	-0.808608	0.17771	-4.55015	5.36e-06	2.97e-05	2	30077683	30091022	+	protein_coding	Pkn3	ENSMUSG00000026785	126.432	118.068	120.329	81.836	97.6476	159.513	146.673	73.4361	90.4721	67.5808	57.8963	73.4746	43.2152	87.7395	42.0179	41.9449	50.1044	45.0172	102.87	45.2063	2	30077683	30091022	+	protein_coding	Pkn3
ENSMUSG00000104727	3.66108	-0.808179	0.326443	-2.47571	0.013297	0.0334712	5	128448903	128449782	+	lncRNA	Gm42500	ENSMUSG00000104727	0.85427	6.10696	0	11.0341	4.70591	7.14236	4.16093	4.89574	12.9246	3.37904	3.27715	1.06485	0	7.62952	1.82686	1.44637	0.92786	0	0	1.84515	5	128448903	128449782	+	lncRNA	Gm42500
ENSMUSG00000030450	44.792	-0.807109	0.168762	-4.78252	1.73e-06	1.06e-05	7	56239759	56536518	+	protein_coding	Oca2	ENSMUSG00000030450	46.9848	72.2656	67.9639	51.4923	68.2357	52.3773	62.414	57.933	56.3143	43.9275	43.6953	20.2321	43.2152	26.7033	36.5373	30.3739	40.8258	35.7829	9.04351	29.5225	7	56239759	56536518	+	protein_coding	Oca2
ENSMUSG00000031505	2871.72	-0.806525	0.06058	-13.3134	1.93e-40	8.59e-38	8	11497505	11514960	+	protein_coding	Naxd	ENSMUSG00000031505	3243.66	3433.13	3795.95	3578.72	3688.26	3819.97	4194.22	3796.65	3612.42	3439.86	2144.35	2415.08	2218.07	2247.85	1963.88	1878.12	1775	2023.47	2299.31	1866.37	8	11497505	11514960	+	protein_coding	Naxd
ENSMUSG00000048038	684.334	-0.806503	0.268555	-3.00312	0.00267227	0.00814789	2	26243468	26294557	-	protein_coding	Ccdc187	ENSMUSG00000048038	323.768	1063.63	876.845	1169.61	900.005	702.332	1087.04	823.301	1654.35	584.574	211.922	373.762	995.828	276.57	333.403	875.057	761.773	266.64	177.479	228.799	2	26243468	26294557	-	protein_coding	Ccdc187
ENSMUSG00000091511	148.735	-0.80647	0.149907	-5.3798	7.46e-08	5.87e-07	10	130471051	130497396	-	protein_coding	Vmn2r87	ENSMUSG00000091511	217.839	129.264	158.211	229.876	216.472	224.984	215.328	140.345	180.944	200.49	136.548	138.43	112.735	155.452	60.2865	78.1042	67.7338	114.274	105.131	92.2577	10	130471051	130497396	-	protein_coding	Vmn2r87
ENSMUSG00000005628	38.2918	-0.806097	0.249365	-3.23259	0.00122671	0.00409143	3	95124475	95129209	+	protein_coding	Tmod4	ENSMUSG00000005628	19.6482	21.3743	17.8266	52.4118	36.4708	54.7581	96.7417	66.0925	63.6998	78.8443	25.1248	15.9727	47.9125	17.1664	19.1821	24.5884	25.9801	42.7086	28.261	11.0709	3	95124475	95129209	+	protein_coding	Tmod4
ENSMUSG00000080807	2.2088	-0.805806	0.322759	-2.49662	0.0125385	0.0318098	4	154043732	154044423	-	processed_pseudogene	Gm13117	ENSMUSG00000080807	6.83416	4.0713	6.68497	8.27555	1.17648	0	2.08047	1.63191	0	4.50539	0	1.06485	0	1.90738	1.82686	0	1.85572	0	2.26088	0	4	154043732	154044423	-	processed_pseudogene	Gm13117
ENSMUSG00000045912	1642.9	-0.805681	0.0806228	-9.99321	1.63e-23	1.31e-21	10	79606853	79614025	-	protein_coding	C2cd4c	ENSMUSG00000045912	2085.27	1687.56	2226.1	1964.98	2215.31	2193.9	2146	2071.72	2155.64	2221.16	1531.52	1268.23	1127.35	992.792	1108.91	1443.48	982.604	1308.96	1119.13	1007.45	10	79606853	79614025	-	protein_coding	C2cd4c
ENSMUSG00000086591	3.28982	-0.805145	0.324701	-2.47965	0.0131513	0.0331438	11	69448547	69453676	+	lncRNA	Dnah2os	ENSMUSG00000086591	2.56281	6.10696	2.22832	0	7.05886	5.95197	3.1207	8.97553	10.155	2.25269	0	2.1297	0.939461	0.95369	0.913432	1.44637	3.71144	0	4.52175	2.76773	11	69448547	69453676	+	lncRNA	Dnah2os
ENSMUSG00000087416	32.8233	-0.804665	0.163945	-4.90813	9.2e-07	5.91e-06	4	129135090	129136910	+	lncRNA	Gm15906	ENSMUSG00000087416	44.422	46.82	50.1373	38.6193	25.8825	44.0446	41.6093	33.4542	55.3911	42.8012	21.8477	33.0103	21.6076	22.8886	16.4418	28.9275	21.3408	32.3201	19.2175	15.6838	4	129135090	129136910	+	lncRNA	Gm15906
ENSMUSG00000100555	136.852	-0.804454	0.182938	-4.39742	1.1e-05	5.7e-05	1	111804933	111807775	-	processed_pseudogene	Gm8173	ENSMUSG00000100555	68.3416	156.745	128.129	274.932	144.707	267.839	251.736	149.32	179.098	152.057	99.4068	138.43	68.5806	107.767	58.4596	96.9071	90.9303	132.743	91.5655	79.3416	1	111804933	111807775	-	processed_pseudogene	Gm8173
ENSMUSG00000103710	2.89571	-0.804371	0.322009	-2.49797	0.0124905	0.0317053	9	87729284	87732090	+	TEC	D030062O11Rik	ENSMUSG00000103710	8.5427	3.05348	3.34249	0	3.52943	5.95197	2.08047	0	5.53911	14.6425	0	5.32424	0.939461	0.95369	0	2.16956	0	0	0	1.84515	9	87729284	87732090	+	TEC	D030062O11Rik
ENSMUSG00000002458	1189.03	-0.804312	0.0834051	-9.64343	5.24e-22	3.46e-20	2	181688418	181693977	-	protein_coding	Rgs19	ENSMUSG00000002458	1600.05	1506.38	1491.86	1617.41	1555.3	1555.84	1414.72	1526.66	1513.1	1387.66	1144.82	1126.61	857.728	934.616	769.11	723.911	769.196	844.939	750.611	690.087	2	181688418	181693977	-	protein_coding	Rgs19
ENSMUSG00000083359	2.29419	-0.804251	0.315466	-2.5494	0.0107907	0.0278924	4	94497031	94497608	+	processed_pseudogene	Gm12656	ENSMUSG00000083359	0	0	0	6.43654	2.35295	9.52315	3.1207	3.26383	9.23185	4.50539	1.09238	0	1.87892	0	0	2.16956	0	2.30858	0	0	4	94497031	94497608	+	processed_pseudogene	Gm12656
ENSMUSG00000033036	160.604	-0.803897	0.247838	-3.24364	0.00118012	0.00395823	5	43913143	43913917	+	protein_coding	Gm7879	ENSMUSG00000033036	76.8843	179.137	267.399	91.9506	195.295	276.171	328.714	360.653	88.6258	263.565	80.8363	70.28	92.0671	160.22	166.245	78.1042	74.2288	175.452	119.826	66.4255	5	43913143	43913917	+	protein_coding	Gm7879
ENSMUSG00000031347	1420.83	-0.803651	0.0983918	-8.16786	3.14e-16	9.3e-15	X	72913531	72918411	-	protein_coding	Cetn2	ENSMUSG00000031347	1723.06	1847.35	1882.93	1838.09	1975.3	1826.06	1826.65	1775.52	1625.73	1829.19	1270.44	1470.56	1168.69	839.247	827.569	811.416	903.735	931.51	1224.26	819.248	X	72913531	72918411	-	protein_coding	Cetn2
ENSMUSG00000001383	14557.4	-0.803317	0.0585012	-13.7316	6.56e-43	3.31e-40	18	36793875	36799666	+	protein_coding	Zmat2	ENSMUSG00000001383	16572	16161	18459.4	19476.1	20977.8	19603.4	18928.1	20022	16749.3	18441.7	11459.1	11553.6	10877.1	10194	9569.11	9831.01	9837.17	9791.82	12171.4	10473.1	18	36793875	36799666	+	protein_coding	Zmat2
ENSMUSG00000073125	218.168	-0.803081	0.227473	-3.53045	0.00041486	0.00154522	X	73192206	73202930	+	protein_coding	Xlr3b	ENSMUSG00000073125	169.145	274.813	475.747	190.338	276.472	317.835	278.782	184.406	353.58	344.662	99.4068	212.97	351.358	125.887	145.236	108.478	167.943	96.9602	126.609	62.7352	X	73192206	73202930	+	protein_coding	Xlr3b
ENSMUSG00000114311	7.02926	-0.80305	0.296556	-2.70792	0.00677068	0.0185827	13	107063692	107099252	+	lncRNA	Gm31452	ENSMUSG00000114311	10.2512	23.41	3.34249	11.9536	7.05886	5.95197	9.3621	11.4234	1.84637	12.3898	2.18477	2.1297	1.87892	1.90738	6.39402	7.95506	6.49502	3.46286	5.65219	5.53546	13	107063692	107099252	+	lncRNA	Gm31452
ENSMUSG00000104626	21.9796	-0.802955	0.236284	-3.39826	0.000678151	0.00241197	5	13548693	13552728	+	TEC	Gm42675	ENSMUSG00000104626	11.1055	26.4635	17.8266	57.0094	23.5295	38.0926	45.7702	19.583	26.7724	23.6533	17.4781	14.9079	7.51568	22.8886	8.22089	15.1869	16.7015	18.4686	9.04351	19.3741	5	13548693	13552728	+	TEC	Gm42675
ENSMUSG00000029373	39.407	-0.802831	0.190723	-4.20941	2.56e-05	0.000124739	5	90772434	90773383	+	protein_coding	Pf4	ENSMUSG00000029373	36.7336	47.8378	71.3063	75.3995	40.0002	39.283	39.5288	26.9266	79.3939	54.0647	38.2334	29.8158	31.9417	26.7033	27.403	21.6956	20.4129	40.4001	22.6088	18.4515	5	90772434	90773383	+	protein_coding	Pf4
ENSMUSG00000108532	19.8903	-0.802635	0.25141	-3.19253	0.00141031	0.0046247	7	94042690	94709171	+	lncRNA	Gm32647	ENSMUSG00000108532	10.2512	12.2139	31.1965	23.9072	15.2942	24.9983	27.0461	51.4053	39.697	28.1587	19.6629	11.7133	25.3654	11.4443	16.4418	17.3565	8.35074	4.61715	11.3044	7.38061	7	94042690	94709171	+	lncRNA	Gm32647
ENSMUSG00000064982	11.81	-0.802488	0.266476	-3.01148	0.00259976	0.00795338	7	30356731	30356924	-	snRNA	Gm25259	ENSMUSG00000064982	8.5427	13.2317	15.5983	16.5511	22.3531	10.7135	30.1668	8.97553	19.3869	12.3898	15.2934	12.7782	8.45515	14.3054	3.65373	3.61594	4.6393	2.30858	6.78263	6.45804	7	30356731	30356924	-	snRNA	Gm25259
ENSMUSG00000083860	12.0725	-0.802487	0.266709	-3.00885	0.00262236	0.0080138	2	15127599	15128683	+	processed_pseudogene	Gm13313	ENSMUSG00000083860	13.6683	12.2139	15.5983	9.19506	14.1177	28.5695	12.4828	16.3191	16.6173	22.5269	19.6629	12.7782	7.51568	5.72214	7.30746	2.89275	7.42288	0	11.3044	5.53546	2	15127599	15128683	+	processed_pseudogene	Gm13313
ENSMUSG00000046470	402.786	-0.801903	0.155209	-5.16659	2.38e-07	1.7e-06	2	181669835	181671640	-	protein_coding	Sox18	ENSMUSG00000046470	738.089	612.731	366.559	507.567	282.354	630.909	745.847	425.93	482.826	390.842	337.546	249.175	344.782	367.171	197.301	225.634	233.821	401.692	221.566	293.379	2	181669835	181671640	-	protein_coding	Sox18
ENSMUSG00000097652	22.3989	-0.80178	0.276786	-2.89675	0.00377045	0.0110722	14	54968677	54974349	+	lncRNA	Mhrt	ENSMUSG00000097652	5.12562	18.3209	16.7124	33.1022	31.7649	38.0926	44.73	35.0862	44.3129	34.9168	9.83144	18.1024	40.3968	10.4906	2.7403	11.571	22.2686	10.3886	13.5653	6.45804	14	54968677	54974349	+	lncRNA	Mhrt
ENSMUSG00000031848	2715.15	-0.801546	0.0671384	-11.9387	7.44e-33	1.71e-30	8	70673247	70678752	+	protein_coding	Lsm4	ENSMUSG00000031848	2819.94	3297.76	3498.47	3524.47	3907.08	3656.89	3759.4	3645.7	3291.15	3179.68	2130.15	1974.23	2353.35	2183.95	1915.47	1750.11	1749.02	1833.01	2091.31	1741.82	8	70673247	70678752	+	protein_coding	Lsm4
ENSMUSG00000093674	17023.4	-0.801212	0.0811939	-9.86788	5.74e-23	4.26e-21	10	128548113	128549305	-	protein_coding	Rpl41	ENSMUSG00000093674	16474.6	21593.2	23814.1	24702.5	24210.7	22873.4	24708.7	19097.5	21719.8	17828.9	13409	15063.3	12449.7	13841.9	11307.4	11376.5	10958	11960.7	12556.9	10522	10	128548113	128549305	-	protein_coding	Rpl41
ENSMUSG00000022342	6136.4	-0.800726	0.106182	-7.54106	4.66e-14	9.9e-13	15	45106283	45114920	-	protein_coding	Kcnv1	ENSMUSG00000022342	10916.7	7793.49	7243.17	7829.59	6596.51	8053.02	7125.6	8095.11	6424.44	8328.21	6270.28	5706.52	4517.87	4373.62	4132.37	3719.35	3663.19	4610.23	3245.49	4083.32	15	45106283	45114920	-	protein_coding	Kcnv1
ENSMUSG00000070667	10.9525	-0.800195	0.272704	-2.9343	0.00334299	0.00994237	4	137395298	137395676	+	processed_pseudogene	Rpl31-ps10	ENSMUSG00000070667	10.2512	18.3209	16.7124	7.35605	10.5883	14.2847	28.0863	13.0553	14.771	13.5162	13.1086	6.38909	1.87892	14.3054	3.65373	4.33912	1.85572	4.61715	9.04351	12.9161	4	137395298	137395676	+	processed_pseudogene	Rpl31-ps10
ENSMUSG00000023908	427.271	-0.799963	0.07278	-10.9915	4.2e-28	5.65e-26	17	23726335	23736735	+	protein_coding	Pkmyt1	ENSMUSG00000023908	485.225	483.467	548.168	581.128	665.886	570.199	529.479	526.292	580.683	474.192	278.558	304.547	346.661	319.486	368.113	323.265	262.584	300.115	308.61	288.767	17	23726335	23736735	+	protein_coding	Pkmyt1
ENSMUSG00000037991	17.1356	-0.799945	0.255042	-3.13652	0.00170966	0.00549162	16	10835058	10892966	+	protein_coding	Rmi2	ENSMUSG00000037991	13.6683	36.6417	20.0549	16.5511	23.5295	21.4271	22.8851	17.1351	36.9274	18.0216	24.0324	29.8158	9.39461	6.67583	5.48059	6.50869	8.35074	6.92573	11.3044	7.38061	16	10835058	10892966	+	protein_coding	Rmi2
ENSMUSG00000105543	20.362	-0.799508	0.265468	-3.01169	0.00259798	0.00795083	5	22863811	22868545	-	TEC	Gm43169	ENSMUSG00000105543	3.41708	23.41	17.8266	25.7462	17.6472	48.8062	49.9312	16.3191	42.4665	27.0323	17.4781	8.51879	11.2735	13.3517	20.0955	16.6333	13.9179	13.8515	15.8261	3.69031	5	22863811	22868545	-	TEC	Gm43169
ENSMUSG00000029755	614.839	-0.798165	0.160917	-4.96009	7.05e-07	4.62e-06	6	6877804	6882085	-	protein_coding	Dlx5	ENSMUSG00000029755	514.27	1052.43	782.142	667.561	1054.12	582.103	731.284	820.853	1133.67	578.942	443.507	325.844	769.418	411.04	316.047	545.283	570.634	357.829	343.653	296.147	6	6877804	6882085	-	protein_coding	Dlx5
ENSMUSG00000035285	6400.39	-0.798108	0.069367	-11.5056	1.24e-30	2.16e-28	7	4922027	4925006	+	protein_coding	Nat14	ENSMUSG00000035285	6709.43	7998.08	8576.82	8107.28	8937.7	8617.26	8494.54	8517.78	7951.39	7545.4	5199.74	5601.1	5154.82	4712.18	4241.06	4060.7	4005.57	4387.45	5141.23	4048.27	7	4922027	4925006	+	protein_coding	Nat14
ENSMUSG00000059187	2576.15	-0.797566	0.10892	-7.3225	2.43e-13	4.61e-12	6	96113153	96657198	+	protein_coding	Tafa1	ENSMUSG00000059187	3204.37	2809.2	3488.44	3542.86	2716.49	3368.81	3380.76	3808.89	2852.64	3723.7	2473.15	2601.43	1695.73	1632.72	1778.45	1537.5	1324.98	2119.27	2073.22	1390.32	6	96113153	96657198	+	protein_coding	Tafa1
ENSMUSG00000033191	725.068	-0.79746	0.118392	-6.73577	1.63e-11	2.35e-10	4	118471190	118490061	-	protein_coding	Tie1	ENSMUSG00000033191	1429.19	1022.92	1031.71	1019.73	757.651	860.655	867.554	709.067	826.251	742.263	607.365	644.233	495.096	606.547	364.459	449.099	421.248	556.367	599.132	490.811	4	118471190	118490061	-	protein_coding	Tie1
ENSMUSG00000098613	1.79395	-0.797293	0.325694	-2.44798	0.0143659	0.035788	11	102999847	102999921	-	miRNA	Mir6931	ENSMUSG00000098613	4.27135	4.0713	2.22832	0.919506	4.70591	4.76158	0	1.63191	1.84637	3.37904	0	1.06485	1.87892	1.90738	0	0	0.92786	1.15429	1.13044	0	11	102999847	102999921	-	miRNA	Mir6931
ENSMUSG00000092626	19.679	-0.797249	0.202437	-3.93825	8.21e-05	0.000358856	11	22858930	22861264	+	lncRNA	9130230N09Rik	ENSMUSG00000092626	16.2311	36.6417	32.3107	15.6316	30.5884	19.0463	28.0863	27.7425	21.2333	29.285	13.1086	13.843	12.213	14.3054	18.2686	10.8478	21.3408	10.3886	6.78263	15.6838	11	22858930	22861264	+	lncRNA	9130230N09Rik
ENSMUSG00000037601	3098.15	-0.797241	0.0752714	-10.5915	3.26e-26	3.59e-24	11	93956978	93968521	-	protein_coding	Nme1	ENSMUSG00000037601	3444.42	3818.88	3870.6	4275.7	3970.61	4325.89	4655.04	4061.02	3360.39	3652.74	2822.72	2694.07	2145.73	2048.53	2174.88	2070.49	1851.08	2321.27	2283.49	2115.47	11	93956978	93968521	-	protein_coding	Nme1
ENSMUSG00000113927	49.4925	-0.797064	0.210234	-3.79132	0.000149849	0.000618395	12	98444816	98448334	-	TEC	5330409N07Rik	ENSMUSG00000113927	22.211	52.927	42.3381	80.9165	70.5886	86.8988	101.943	72.6202	48.9288	65.3281	32.7715	52.1776	44.1546	55.314	17.3552	21.6956	27.8358	39.2458	26.0001	28.5999	12	98444816	98448334	-	TEC	5330409N07Rik
ENSMUSG00000112015	97.9252	-0.796929	0.213786	-3.72769	0.000193246	0.000777674	10	90813082	90814389	+	TEC	Gm47592	ENSMUSG00000112015	38.4421	111.961	54.5939	167.35	94.1182	219.032	248.616	113.418	117.244	112.635	66.6353	70.28	54.4887	85.8321	74.9014	47.0072	64.0223	100.423	52.0002	65.503	10	90813082	90814389	+	TEC	Gm47592
ENSMUSG00000032766	359.784	-0.796658	0.120631	-6.6041	4e-11	5.41e-10	6	4003903	4008445	+	protein_coding	Gng11	ENSMUSG00000032766	342.562	506.877	483.546	490.097	454.12	499.965	559.645	425.93	468.978	367.189	280.742	342.881	353.237	246.052	180.86	216.956	230.109	210.08	340.262	195.586	6	4003903	4008445	+	protein_coding	Gng11
ENSMUSG00000043870	62.821	-0.796571	0.137049	-5.81231	6.16e-09	5.79e-08	16	22230390	22230919	+	processed_pseudogene	Gm5809	ENSMUSG00000043870	79.4471	76.3369	88.0188	85.5141	98.8241	64.2813	84.2589	84.0436	84.0098	59.6964	57.8963	60.6964	45.0941	34.3328	38.3641	52.7927	46.393	57.7144	28.261	30.445	16	22230390	22230919	+	processed_pseudogene	Gm5809
ENSMUSG00000067768	20.2761	-0.796375	0.280666	-2.83744	0.00454763	0.0130702	X	73214332	73222453	+	protein_coding	Xlr4b	ENSMUSG00000067768	28.1909	37.6596	32.3107	21.1486	3.52943	4.76158	41.6093	18.767	58.1607	27.0323	13.1086	19.1673	15.9708	13.3517	3.65373	16.6333	8.35074	19.6229	16.9566	5.53546	X	73214332	73222453	+	protein_coding	Xlr4b
ENSMUSG00000029471	28982.9	-0.796341	0.105437	-7.55278	4.26e-14	9.08e-13	5	122731169	122779409	-	protein_coding	Camkk2	ENSMUSG00000029471	43308.1	33763.3	32605.9	35438.7	33299	38725.9	35678.9	38224.3	35226.9	43609.9	28049.1	26944.9	20394.8	20079	13527.9	19174.6	15455.4	25417.4	21659.2	19074.3	5	122731169	122779409	-	protein_coding	Camkk2
ENSMUSG00000098977	1.46744	-0.796067	0.299452	-2.65842	0.0078509	0.0211519	2	26206701	26209283	+	lncRNA	Gm27196	ENSMUSG00000098977	3.41708	10.1783	0	0	2.35295	4.76158	0	1.63191	1.84637	2.25269	2.18477	0	0	0	0	0.723187	0	0	0	0	2	26206701	26209283	+	lncRNA	Gm27196
ENSMUSG00000082494	25.5596	-0.795514	0.184935	-4.3016	1.7e-05	8.54e-05	2	80499229	80499511	+	processed_pseudogene	Gm13687	ENSMUSG00000082494	21.3567	46.82	24.5116	27.5852	41.1767	39.283	30.1668	37.534	28.6187	33.7904	12.0162	18.1024	22.5471	19.0738	22.8358	15.1869	18.5572	12.6972	28.261	11.0709	2	80499229	80499511	+	processed_pseudogene	Gm13687
ENSMUSG00000103899	100.694	-0.794969	0.196307	-4.04963	5.13e-05	0.000233861	6	28796462	28799713	+	TEC	Gm37940	ENSMUSG00000103899	146.934	103.818	137.042	106.663	123.53	142.847	153.954	130.553	132.939	126.151	55.7115	92.6418	32.8811	37.1939	69.4208	73.7651	37.1144	84.263	172.957	53.5095	6	28796462	28799713	+	TEC	Gm37940
ENSMUSG00000037771	8614.42	-0.794752	0.099307	-8.00298	1.21e-15	3.32e-14	2	158610766	158615748	+	protein_coding	Slc32a1	ENSMUSG00000037771	9520.84	11850.5	10206.8	9781.7	12797.7	9093.42	10515.7	10963.2	14907.6	10184.4	6666.81	6404	8977.49	5280.58	5302.47	6689.48	5895.62	6498.64	5882.8	4868.44	2	158610766	158615748	+	protein_coding	Slc32a1
ENSMUSG00000112448	60.1442	-0.794743	0.193685	-4.10327	4.07e-05	0.000189779	12	44409789	44411469	+	TEC	Gm48182	ENSMUSG00000112448	21.3567	61.0696	41.224	83.675	100.001	109.516	115.466	78.3319	87.7026	82.2233	31.6791	55.3721	43.2152	46.7308	44.7582	47.7304	42.6816	33.4743	40.6958	35.9805	12	44409789	44411469	+	TEC	Gm48182
ENSMUSG00000086814	2.15967	-0.794597	0.324363	-2.44971	0.014297	0.03564	7	132154170	132155301	+	lncRNA	Gm15677	ENSMUSG00000086814	1.70854	4.0713	1.11416	0	7.05886	2.38079	6.2414	2.44787	3.69274	5.63174	0	0	0	0	0	2.16956	1.85572	0	1.13044	3.69031	7	132154170	132155301	+	lncRNA	Gm15677
ENSMUSG00000035557	13.4954	-0.794188	0.249263	-3.18615	0.0014418	0.00471379	11	100256216	100261029	-	protein_coding	Krt17	ENSMUSG00000035557	11.9598	24.4278	6.68497	18.3901	15.2942	26.1887	12.4828	27.7425	14.771	20.2742	13.1086	19.1673	12.213	7.62952	7.30746	7.95506	7.42288	2.30858	9.04351	5.53546	11	100256216	100261029	-	protein_coding	Krt17
ENSMUSG00000118501	41.4819	-0.79415	0.203257	-3.90712	9.34e-05	0.0004031	18	37703538	37705054	+	unprocessed_pseudogene	AC020971.1	ENSMUSG00000118501	19.6482	71.2478	45.6806	67.1239	50.5885	78.566	80.0979	38.35	52.6215	36.0431	20.7553	27.6861	31.9417	43.8698	30.1433	33.9898	31.5472	34.6286	20.3479	14.7612	18	37703538	37705054	+	unprocessed_pseudogene	AC020971.1
ENSMUSG00000110698	16.654	-0.794029	0.201062	-3.94917	7.84e-05	0.000344299	8	126029247	126046808	-	lncRNA	Gm45875	ENSMUSG00000110698	24.7738	28.4991	21.1691	17.4706	17.6472	15.4751	26.0058	20.3989	20.3101	23.6533	10.9238	19.1673	9.39461	11.4443	9.13432	10.8478	11.1343	19.6229	6.78263	9.22577	8	126029247	126046808	-	lncRNA	Gm45875
ENSMUSG00000006021	1757.73	-0.79397	0.103438	-7.67583	1.64e-14	3.83e-13	7	16119894	16127516	+	protein_coding	Kptn	ENSMUSG00000006021	1864.02	1746.59	2014.4	2240.84	2280.01	2542.68	2753.5	2238.99	2509.22	2222.28	1583.95	1590.88	1636.54	1403.83	941.748	1053.68	1148.69	1175.06	1154.18	1053.58	7	16119894	16127516	+	protein_coding	Kptn
ENSMUSG00000110147	2.90752	-0.793783	0.324343	-2.44736	0.0143907	0.0358366	8	49989906	49995544	+	TEC	Gm45324	ENSMUSG00000110147	0	7.12478	0	5.51704	2.35295	2.38079	10.4023	8.15957	7.38548	2.25269	3.27715	0	1.87892	0	0	1.44637	3.71144	0	2.26088	0	8	49989906	49995544	+	TEC	Gm45324
ENSMUSG00000084756	1.79602	-0.793588	0.322894	-2.45774	0.0139816	0.0349544	2	103912023	103918960	+	lncRNA	Gm13881	ENSMUSG00000084756	3.41708	2.03565	4.45665	5.51704	0	2.38079	1.04023	0	5.53911	4.50539	0	0	1.87892	0.95369	1.82686	1.44637	0	0	0	0.922577	2	103912023	103918960	+	lncRNA	Gm13881
ENSMUSG00000032537	4261.18	-0.793558	0.101734	-7.80034	6.17e-15	1.54e-13	9	101922127	102354693	-	protein_coding	Ephb1	ENSMUSG00000032537	5402.4	6043.85	4831.01	5303.71	6125.92	5243.69	5101.3	4655.04	5423.71	6188.15	4110.64	4181.66	3525.8	2974.56	2241.56	2443.65	2857.81	3405.15	2500.53	2663.48	9	101922127	102354693	-	protein_coding	Ephb1
ENSMUSG00000021478	1846.86	-0.7929	0.224661	-3.52932	0.000416632	0.00155114	13	54051182	54055705	-	protein_coding	Drd1	ENSMUSG00000021478	1009.75	2669.76	1705.78	2402.67	3651.78	1792.73	2282.27	2301	3890.3	2454.31	959.112	1874.13	2354.29	833.525	762.716	1637.3	1710.97	1033.09	702.002	909.661	13	54051182	54055705	-	protein_coding	Drd1
ENSMUSG00000049036	1796.36	-0.792793	0.0735716	-10.7758	4.48e-27	5.38e-25	12	113185929	113189523	+	protein_coding	Tmem121	ENSMUSG00000049036	2081.86	2090.61	2314.11	2234.4	2405.9	2381.98	2443.51	2431.55	2263.65	2187.37	1607.99	1600.47	1475.89	1209.28	1130.83	1253.28	1074.46	1350.52	1289.83	1099.71	12	113185929	113189523	+	protein_coding	Tmem121
ENSMUSG00000059305	2.35277	-0.792595	0.321198	-2.46762	0.0136014	0.0341303	16	16868402	16870843	-	protein_coding	Vpreb1	ENSMUSG00000059305	0	8.14261	4.45665	0	11.7648	3.57118	3.1207	1.63191	1.84637	3.37904	1.09238	3.19455	0	0	0	0	1.85572	1.15429	0	1.84515	16	16868402	16870843	-	protein_coding	Vpreb1
ENSMUSG00000048582	16.8128	-0.792578	0.230054	-3.44518	0.000570688	0.00206192	14	57034459	57058100	-	protein_coding	Gja3	ENSMUSG00000048582	18.7939	26.4635	20.0549	25.7462	18.8236	14.2847	33.2875	19.583	18.4637	24.7796	13.1086	10.6485	16.9103	20.0275	9.13432	14.4637	3.71144	16.16	9.04351	2.76773	14	57034459	57058100	-	protein_coding	Gja3
ENSMUSG00000042115	2278.69	-0.792509	0.087058	-9.10323	8.77e-20	4.23e-18	1	132298625	132307357	+	protein_coding	Klhdc8a	ENSMUSG00000042115	2432.96	2690.11	2756.44	2861.5	3482.37	2950.99	2948.02	2891.75	3332.7	2655.93	1641.85	1572.78	2285.71	1820.59	1428.61	1760.24	1643.24	1635.63	1198.26	1584.06	1	132298625	132307357	+	protein_coding	Klhdc8a
ENSMUSG00000022053	45.5559	-0.792502	0.189833	-4.17472	2.98e-05	0.000143145	14	67233291	67430918	+	protein_coding	Ebf2	ENSMUSG00000022053	33.3165	21.3743	65.7355	64.3654	56.4709	54.7581	58.253	88.1234	67.3925	78.8443	46.9725	19.1673	34.76	28.6107	27.403	23.142	34.3308	33.4743	39.5653	35.0579	14	67233291	67430918	+	protein_coding	Ebf2
ENSMUSG00000029608	36836.3	-0.792293	0.091911	-8.62022	6.68e-18	2.49e-16	5	120940498	121010092	-	protein_coding	Rph3a	ENSMUSG00000029608	56502.3	49179.3	42241.2	43257.2	48868.5	45361.2	42274	43526.4	42925.3	54838.5	34475.6	35103.8	24902.3	25890.8	20650	24188.4	21981.9	30861	24529.4	25169.7	5	120940498	121010092	-	protein_coding	Rph3a
ENSMUSG00000118164	155.212	-0.792211	0.137274	-5.771	7.88e-09	7.25e-08	18	75767142	75767274	+	processed_pseudogene	Gm20570	ENSMUSG00000118164	150.351	187.28	166.01	193.096	256.472	185.701	253.817	213.781	188.33	191.479	120.162	178.895	108.977	152.59	102.304	98.3535	64.9502	92.343	110.783	88.5674	18	75767142	75767274	+	processed_pseudogene	Gm20570
ENSMUSG00000031344	148.536	-0.792191	0.26977	-2.93654	0.00331898	0.00987618	X	72825177	72842602	+	protein_coding	Gabrq	ENSMUSG00000031344	63.216	201.53	202.777	108.502	152.942	99.9931	118.587	429.193	495.75	113.761	64.4506	80.9285	153.132	77.2489	131.534	104.862	70.5173	128.126	126.609	47.0514	X	72825177	72842602	+	protein_coding	Gabrq
ENSMUSG00000034880	1395.73	-0.792141	0.0826637	-9.5827	9.45e-22	6.02e-20	8	71464958	71465747	+	protein_coding	Mrpl34	ENSMUSG00000034880	1447.99	1695.7	1797.14	1886.83	1925.89	1940.34	1957.72	1877.52	1665.43	1556.61	1185.24	1363.01	999.586	1075.76	870.501	812.863	950.128	969.602	1019.66	917.041	8	71464958	71465747	+	protein_coding	Mrpl34
ENSMUSG00000049556	36545.6	-0.7921	0.100134	-7.91044	2.56e-15	6.68e-14	9	56618474	56796468	-	protein_coding	Lingo1	ENSMUSG00000049556	64642.6	42015.9	41115.9	41818.2	41003.7	46626.5	46897.9	51652.5	43074	46778.3	34029.9	28477.2	22672	25241.3	27506.2	26532.3	18251.9	34196.9	23512	24867.1	9	56618474	56796468	-	protein_coding	Lingo1
ENSMUSG00000061086	2511.74	-0.791952	0.15671	-5.05361	4.34e-07	2.96e-06	11	104550662	104595753	+	protein_coding	Myl4	ENSMUSG00000061086	4163.71	3130.83	2241.69	2899.2	3114.13	3596.18	4115.16	3119.4	2628.31	3249.51	2610.79	1791.08	1116.08	2609.3	843.098	1951.16	1280.45	2541.74	1506.87	1726.14	11	104550662	104595753	+	protein_coding	Myl4
ENSMUSG00000074006	124.033	-0.791801	0.326558	-2.42469	0.0153215	0.0377811	7	98143358	98145502	-	protein_coding	Omp	ENSMUSG00000074006	35.8793	773.548	207.234	23.9072	530.591	79.7564	47.8507	44.8776	57.2375	69.8335	22.94	21.297	293.112	24.7959	31.0567	28.9275	63.0945	34.6286	38.4349	51.6643	7	98143358	98145502	-	protein_coding	Omp
ENSMUSG00000046337	11.9608	-0.790741	0.288283	-2.74293	0.0060894	0.0169068	1	36562691	36683183	-	protein_coding	Fam178b	ENSMUSG00000046337	15.3769	17.303	16.7124	12.8731	14.1177	28.5695	27.0461	2.44787	17.5405	10.1371	6.5543	19.1673	15.9708	2.86107	4.56716	4.33912	4.6393	9.2343	7.91307	1.84515	1	36562691	36683183	-	protein_coding	Fam178b
ENSMUSG00000058927	1960.71	-0.79047	0.0809526	-9.7646	1.6e-22	1.13e-20	19	24875685	24876631	+	protein_coding	Gm10053	ENSMUSG00000058927	2747.33	2471.28	2501.29	2476.23	2544.72	2556.97	2535.05	2604.54	2163.95	2322.53	1846.13	1895.43	1416.71	1487.76	1273.32	1316.2	1230.34	1408.23	1193.74	1222.41	19	24875685	24876631	+	protein_coding	Gm10053
ENSMUSG00000029061	75.3605	-0.790312	0.224086	-3.52682	0.000420587	0.00156396	4	155650654	155653384	-	protein_coding	Mmp23	ENSMUSG00000029061	152.06	254.456	70.1922	90.1116	49.412	59.5197	40.5691	87.3074	85.8562	94.6132	69.9125	84.123	54.4887	49.5919	45.6716	37.6057	48.2487	35.7829	39.5653	58.1223	4	155650654	155653384	-	protein_coding	Mmp23
ENSMUSG00000036188	2726.16	-0.790118	0.0704872	-11.2094	3.67e-29	5.6e-27	12	36157113	36197291	+	protein_coding	Ankmy2	ENSMUSG00000036188	3273.56	3194.96	3207.67	3515.27	3507.08	3524.76	3641.86	3602.45	3405.63	3752.99	2278.71	2246.83	2573.18	1942.67	1667.93	1844.13	1834.38	2005	1787.22	1716.92	12	36157113	36197291	+	protein_coding	Ankmy2
ENSMUSG00000093688	3.17172	-0.789661	0.325355	-2.42708	0.015221	0.0375715	5	109527459	109529470	-	processed_pseudogene	Gm8488	ENSMUSG00000093688	5.12562	11.1961	2.22832	0	7.05886	7.14236	3.1207	4.89574	3.69274	2.25269	2.18477	1.06485	1.87892	3.81476	1.82686	0	0	0	2.26088	3.69031	5	109527459	109529470	-	processed_pseudogene	Gm8488
ENSMUSG00000020734	6229.27	-0.789426	0.0837456	-9.42648	4.24e-21	2.51e-19	11	115249168	115267243	-	protein_coding	Grin2c	ENSMUSG00000020734	7847.32	8207.75	8054.27	8500.83	6958.86	8128.01	8464.37	7790.76	8065.87	7169.2	5085.04	5856.67	5215.89	4800.88	3130.33	4067.93	3959.18	4768.36	4597.49	3916.34	11	115249168	115267243	-	protein_coding	Grin2c
ENSMUSG00000040690	1486.56	-0.788923	0.0883731	-8.92718	4.37e-19	1.87e-17	4	130047839	130099283	+	protein_coding	Col16a1	ENSMUSG00000040690	1839.24	1911.48	1888.5	2067.05	1611.77	1912.96	2012.85	1681.69	2067.93	1908.03	1070.54	1125.54	1313.37	1189.25	1397.55	838.174	908.375	1014.62	1167.74	804.487	4	130047839	130099283	+	protein_coding	Col16a1
ENSMUSG00000039097	24.5157	-0.788743	0.241715	-3.26312	0.00110194	0.0037231	19	29331169	29334670	-	protein_coding	Rln1	ENSMUSG00000039097	26.4824	24.4278	44.5665	25.7462	18.8236	26.1887	49.9312	35.9021	55.3911	15.7689	15.2934	4.25939	27.2444	15.259	23.7492	26.7579	13.9179	6.92573	22.6088	11.0709	19	29331169	29334670	-	protein_coding	Rln1
ENSMUSG00000032024	1342.89	-0.788559	0.113152	-6.96902	3.19e-12	5.14e-11	9	40685961	40785319	+	protein_coding	Clmp	ENSMUSG00000032024	1732.46	1962.37	1877.36	2216.93	1428.24	1383.24	1428.24	1746.96	1673.73	1666.99	1089.11	1143.65	1469.32	805.868	729.832	734.035	970.541	1030.78	795.829	972.396	9	40685961	40785319	+	protein_coding	Clmp
ENSMUSG00000043583	18.7065	-0.788272	0.211129	-3.73361	0.000188756	0.000762	2	170579417	170602017	-	protein_coding	4930470P17Rik	ENSMUSG00000043583	24.7738	21.3743	16.7124	18.3901	35.2943	28.5695	22.8851	32.6383	22.1564	20.2742	17.4781	12.7782	7.51568	17.1664	20.0955	13.0174	9.2786	6.92573	20.3479	6.45804	2	170579417	170602017	-	protein_coding	4930470P17Rik
ENSMUSG00000000215	2.51889	-0.788122	0.322	-2.44759	0.0143817	0.0358194	7	142678655	142743381	-	protein_coding	Ins2	ENSMUSG00000000215	1.70854	14.2496	2.22832	1.83901	7.05886	0	6.2414	4.89574	1.84637	0	2.18477	2.1297	1.87892	0	0	0	1.85572	0	2.26088	0	7	142678655	142743381	-	protein_coding	Ins2
ENSMUSG00000097330	43.9947	-0.7881	0.158476	-4.97299	6.59e-07	4.35e-06	18	37746558	37768242	-	lncRNA	Gm26672	ENSMUSG00000097330	49.5476	59.0339	47.909	79.0775	45.8826	65.4717	65.5347	69.3564	49.852	31.5377	30.5867	42.5939	34.76	35.2865	24.6627	31.8202	21.3408	31.1658	39.5653	24.9096	18	37746558	37768242	-	lncRNA	Gm26672
ENSMUSG00000020205	1689.98	-0.787916	0.0837676	-9.40597	5.16e-21	3.01e-19	10	111506285	111508645	+	protein_coding	Phlda1	ENSMUSG00000020205	1724.77	2131.33	2221.64	2154.4	2507.07	2264.13	2276.03	2291.21	2051.32	1852.84	1502.03	1483.33	1303.03	1306.56	1084.24	1114.43	1094.87	1378.22	942.786	1115.4	10	111506285	111508645	+	protein_coding	Phlda1
ENSMUSG00000023004	11698.9	-0.78787	0.0815891	-9.65656	4.61e-22	3.08e-20	15	98931424	98934565	-	protein_coding	Tuba1b	ENSMUSG00000023004	12749.1	13788.5	15603.8	15936	15607.1	16939.3	16916.3	15455.9	12008.8	13634.4	10607	9776.37	8193.98	9108.7	7420.72	8523.49	6450.48	8799.14	7766.11	8692.52	15	98931424	98934565	-	protein_coding	Tuba1b
ENSMUSG00000090207	41.0058	-0.787229	0.202294	-3.89152	9.96e-05	0.000427285	9	106891546	106895182	+	lncRNA	4930524O07Rik	ENSMUSG00000090207	41.8592	76.3369	96.9321	37.6997	91.7652	38.0926	35.3679	29.3745	44.3129	40.5485	43.6953	28.7509	23.4865	29.5644	26.4895	23.142	32.4751	21.9315	26.0001	32.2902	9	106891546	106895182	+	lncRNA	4930524O07Rik
ENSMUSG00000029882	4.21684	-0.78718	0.323771	-2.43129	0.0150452	0.0372165	6	41030267	41035509	-	protein_coding	2210010C04Rik	ENSMUSG00000029882	3.41708	2.03565	8.91329	1.83901	7.05886	8.33276	10.4023	6.52766	1.84637	11.2635	2.18477	4.25939	0	0	0	2.89275	5.56716	0	2.26088	5.53546	6	41030267	41035509	-	protein_coding	2210010C04Rik
ENSMUSG00000018677	4873.11	-0.786931	0.0732501	-10.7431	6.39e-27	7.54e-25	11	102402984	102407946	-	protein_coding	Slc25a39	ENSMUSG00000018677	5441.7	6041.82	6306.16	5992.42	7016.51	6600.73	6721.98	6119.68	6004.39	5612.59	4336.76	4253.01	4053.77	3632.61	3032.59	2940.48	3326.38	3442.09	3443.32	3143.22	11	102402984	102407946	-	protein_coding	Slc25a39
ENSMUSG00000052584	5265.91	-0.786909	0.0690447	-11.3971	4.32e-30	7.12e-28	14	76532813	76556889	-	protein_coding	Serp2	ENSMUSG00000052584	5397.28	5770.06	6960.17	6759.29	7327.1	7153.08	7561.45	7367.28	6548.15	5982.03	4361.88	4278.56	4023.71	4048.41	3663.78	3819.88	3256.79	3827.62	3872.88	3338.81	14	76532813	76556889	-	protein_coding	Serp2
ENSMUSG00000041012	93.4539	-0.78685	0.134766	-5.83866	5.26e-09	5e-08	9	114789344	114844156	-	protein_coding	Cmtm8	ENSMUSG00000041012	115.326	112.979	116.987	129.65	116.471	176.178	115.466	133.001	110.782	66.4545	88.483	77.7339	60.1255	87.7395	65.7671	52.0695	60.3109	68.103	50.8697	64.5804	9	114789344	114844156	-	protein_coding	Cmtm8
ENSMUSG00000026875	47.275	-0.78681	0.189965	-4.14186	3.44e-05	0.000163358	2	34941749	34961772	-	protein_coding	Traf1	ENSMUSG00000026875	51.2562	85.4974	62.3931	61.6069	64.7062	57.1389	71.7761	48.9574	85.8562	20.2742	34.9562	38.3345	43.2152	26.7033	27.403	22.4188	34.3308	30.0115	56.5219	22.1418	2	34941749	34961772	-	protein_coding	Traf1
ENSMUSG00000026023	49.726	-0.786766	0.191345	-4.11177	3.93e-05	0.000183835	1	59256905	59352993	+	protein_coding	Cdk15	ENSMUSG00000026023	74.3215	65.1409	43.4523	75.3995	76.471	80.9468	45.7702	53.8532	72.9316	54.0647	26.2172	60.6964	21.6076	46.7308	39.2776	29.6507	20.4129	13.8515	53.1306	40.5934	1	59256905	59352993	+	protein_coding	Cdk15
ENSMUSG00000000409	123.871	-0.786398	0.122439	-6.4228	1.34e-10	1.65e-09	4	129548343	129573641	-	protein_coding	Lck	ENSMUSG00000000409	122.161	135.371	158.211	125.972	189.413	190.463	209.087	147.688	163.404	140.793	71.0049	55.3721	107.099	85.8321	101.391	99.0767	82.5795	108.503	82.522	101.483	4	129548343	129573641	-	protein_coding	Lck
ENSMUSG00000068696	9778.59	-0.786107	0.173944	-4.51932	6.2e-06	3.4e-05	3	116249653	116253503	-	protein_coding	Gpr88	ENSMUSG00000068696	7107.52	12415.4	9220.8	11640.9	17768.3	10664.7	12396.5	13193.2	19905.7	11521.4	6956.29	10673	9705.57	5256.74	4910.61	6784.22	7238.23	6185.83	7506.11	4520.63	3	116249653	116253503	-	protein_coding	Gpr88
ENSMUSG00000040616	335.234	-0.785825	0.125348	-6.26916	3.63e-10	4.15e-09	4	142030991	142084304	-	protein_coding	Tmem51	ENSMUSG00000040616	304.974	391.863	494.688	514.923	496.473	486.871	423.375	409.61	411.74	341.283	306.96	349.27	310.961	234.608	201.868	185.859	178.149	268.949	186.522	205.735	4	142030991	142084304	-	protein_coding	Tmem51
ENSMUSG00000091957	14508.6	-0.785229	0.212876	-3.68868	0.000225422	0.000893245	18	61259007	61259972	-	transcribed_processed_pseudogene	Rps2-ps10	ENSMUSG00000091957	11531.8	23932.1	26225.1	16445.4	26750.7	18188	15347.6	14036.9	23957.6	12202.8	4286.51	11507.8	10057.9	18611.3	9044.8	15422.7	8249.6	10500.6	4600.88	9270.97	18	61259007	61259972	-	transcribed_processed_pseudogene	Rps2-ps10
ENSMUSG00000038539	1781.25	-0.785031	0.118567	-6.62097	3.57e-11	4.87e-10	7	44812255	44816658	-	protein_coding	Atf5	ENSMUSG00000038539	1874.27	2521.16	2591.54	2712.54	2296.48	2666.48	2523.6	1926.47	1845.45	1741.33	1456.15	1928.44	1436.44	1081.48	1293.42	914.109	1062.4	1157.75	1572.44	1023.14	7	44812255	44816658	-	protein_coding	Atf5
ENSMUSG00000075316	342.78	-0.784978	0.123533	-6.35442	2.09e-10	2.49e-09	2	66480079	66634962	-	protein_coding	Scn9a	ENSMUSG00000075316	313.517	334.865	324.221	426.651	440.002	469.015	535.72	537.716	586.222	403.232	243.601	284.315	295.93	167.849	230.185	282.766	280.214	210.08	293.914	195.586	2	66480079	66634962	-	protein_coding	Scn9a
ENSMUSG00000030495	2288.74	-0.784386	0.120354	-6.5173	7.16e-11	9.25e-10	7	35186384	35201114	+	protein_coding	Slc7a10	ENSMUSG00000030495	3405.12	3114.55	2896.82	2535.08	2741.19	2668.86	2593.3	2755.49	3365.93	3090.7	2361.73	2337.34	2085.6	1409.55	1125.35	1171.56	1317.56	1686.41	1755.57	1357.11	7	35186384	35201114	+	protein_coding	Slc7a10
ENSMUSG00000097666	37.5321	-0.784382	0.213455	-3.6747	0.000238133	0.000937669	18	77729495	77732739	-	lncRNA	A330094K24Rik	ENSMUSG00000097666	12.814	41.7309	61.2789	42.2973	64.7062	42.8542	70.7358	48.9574	61.8534	41.6748	18.5705	29.8158	32.8811	18.1201	23.7492	32.5434	44.5373	30.0115	15.8261	15.6838	18	77729495	77732739	-	lncRNA	A330094K24Rik
ENSMUSG00000024227	211.845	-0.783944	0.1458	-5.37683	7.58e-08	5.96e-07	17	58878807	58991375	-	protein_coding	Pdzph1	ENSMUSG00000024227	237.487	268.706	266.285	275.852	241.178	310.693	332.875	300.272	239.105	235.407	247.971	181.024	177.558	142.1	62.1134	110.648	151.241	173.143	125.479	157.761	17	58878807	58991375	-	protein_coding	Pdzph1
ENSMUSG00000033467	2641.82	-0.783761	0.0982802	-7.97476	1.53e-15	4.11e-14	5	109554708	109558993	-	protein_coding	Crlf2	ENSMUSG00000033467	3288.08	3338.47	4441.05	2813.69	3434.14	3874.73	4202.54	3117.77	2586.76	2483.6	2015.45	1978.49	2413.47	1981.77	1666.1	1742.16	1610.76	2092.72	1920.61	1834.08	5	109554708	109558993	-	protein_coding	Crlf2
ENSMUSG00000020928	126.153	-0.78276	0.152838	-5.12151	3.03e-07	2.13e-06	11	102835848	102838040	+	protein_coding	Higd1b	ENSMUSG00000020928	186.231	176.084	189.407	164.592	115.295	224.984	168.518	155.032	111.705	121.645	74.282	146.949	91.1277	85.8321	77.6417	68.7028	59.383	80.8001	139.044	85.7996	11	102835848	102838040	+	protein_coding	Higd1b
ENSMUSG00000031972	695.484	-0.782478	0.0818051	-9.56515	1.12e-21	7.07e-20	8	123891768	123894751	-	protein_coding	Acta1	ENSMUSG00000031972	892.712	687.033	750.945	962.723	864.711	930.888	1076.64	975.885	841.945	838.002	526.528	528.165	410.544	518.807	616.567	464.286	436.094	526.355	566.35	494.501	8	123891768	123894751	-	protein_coding	Acta1
ENSMUSG00000104394	185.471	-0.782398	0.103285	-7.57514	3.59e-14	7.79e-13	1	187236456	187240357	+	TEC	Gm37254	ENSMUSG00000104394	172.562	221.886	191.636	247.347	252.943	249.983	318.311	231.732	191.099	281.587	139.825	133.106	149.374	119.211	127.88	120.049	136.395	122.354	137.913	164.219	1	187236456	187240357	+	TEC	Gm37254
ENSMUSG00000024114	63.0977	-0.78229	0.287453	-2.72145	0.00649962	0.0179116	17	23836784	23844172	-	protein_coding	Prss41	ENSMUSG00000024114	58.0903	98.7291	115.873	69.8825	134.118	63.0909	86.3393	46.5096	126.476	55.191	2.18477	36.2049	68.5806	70.5731	45.6716	70.1492	39.898	33.4743	6.78263	34.1353	17	23836784	23844172	-	protein_coding	Prss41
ENSMUSG00000068396	2160.88	-0.782102	0.119847	-6.52582	6.76e-11	8.78e-10	6	71124609	71124963	+	processed_pseudogene	Rpl34-ps1	ENSMUSG00000068396	1530.85	1949.14	3102.94	2437.61	3230.61	3799.74	3037.48	2936.63	2586.76	2912.73	1496.56	1606.86	1593.33	1672.77	1292.51	1840.51	1285.09	1929.97	1667.4	1308.21	6	71124609	71124963	+	processed_pseudogene	Rpl34-ps1
ENSMUSG00000107373	2.68644	-0.781961	0.322034	-2.42819	0.0151743	0.0374701	5	73015198	73017685	+	TEC	Gm42668	ENSMUSG00000107373	0	11.1961	3.34249	8.27555	1.17648	4.76158	4.16093	3.26383	6.46229	0	0	0	1.87892	1.90738	0	0.723187	0.92786	0	5.65219	0	5	73015198	73017685	+	TEC	Gm42668
ENSMUSG00000028174	40.994	-0.781931	0.183905	-4.25182	2.12e-05	0.000104878	3	159599174	159625321	+	protein_coding	Rpe65	ENSMUSG00000028174	44.422	31.5526	40.1098	51.4923	76.471	77.3756	79.0577	47.3255	46.1592	34.9168	40.4182	19.1673	29.1233	33.3792	34.7104	20.2492	38.0423	21.9315	22.6088	31.3676	3	159599174	159625321	+	protein_coding	Rpe65
ENSMUSG00000038718	977.366	-0.781266	0.24407	-3.20099	0.00136958	0.00451131	2	34171456	34373142	-	protein_coding	Pbx3	ENSMUSG00000038718	673.165	2253.47	1396.04	1059.27	1563.54	959.458	991.342	1202.72	1817.75	930.363	505.773	576.083	1854.5	490.197	518.829	564.809	998.377	449.018	345.914	396.708	2	34171456	34373142	-	protein_coding	Pbx3
ENSMUSG00000021124	11863.6	-0.780813	0.0873085	-8.94314	3.78e-19	1.64e-17	12	79156016	79172667	-	protein_coding	Vti1b	ENSMUSG00000021124	13047.3	14468.4	15637.3	15556.2	16455.4	15528.7	16221.4	15433.8	13517.3	14661.7	11317.1	11375.8	9176.65	8551.74	6575.8	7026.49	7327.31	8623.68	8717.94	8051.33	12	79156016	79172667	-	protein_coding	Vti1b
ENSMUSG00000071658	18699.5	-0.78064	0.0635457	-12.2847	1.09e-34	3e-32	19	8836932	8839194	-	protein_coding	Gng3	ENSMUSG00000071658	20826.2	22028.8	22199.7	22913.2	26328.4	25889.9	26545.7	25241.6	22286.6	22577.6	16980	14568.2	14185.9	14221.4	12099.3	12330.3	12452.8	13789.1	13192.2	13332.2	19	8836932	8839194	-	protein_coding	Gng3
ENSMUSG00000093910	685.249	-0.780134	0.0909667	-8.57604	9.82e-18	3.59e-16	5	143287037	143293623	-	protein_coding	Zfp853	ENSMUSG00000093910	927.737	751.156	825.594	808.246	810.593	933.269	873.796	887.761	916.723	957.395	664.169	618.677	548.645	471.123	445.755	451.269	343.308	549.441	489.48	430.843	5	143287037	143293623	-	protein_coding	Zfp853
ENSMUSG00000058022	15.7803	-0.780036	0.218789	-3.56524	0.000363524	0.00137341	13	41763147	41847684	-	protein_coding	Adtrp	ENSMUSG00000058022	20.5025	13.2317	16.7124	22.0681	27.059	19.0463	20.8047	12.2394	24.926	28.1587	17.4781	18.1024	7.51568	11.4443	12.788	7.23187	4.6393	11.5429	9.04351	11.0709	13	41763147	41847684	-	protein_coding	Adtrp
ENSMUSG00000034254	11416.5	-0.779782	0.0838136	-9.30376	1.36e-20	7.38e-19	17	34604261	34613449	+	protein_coding	Agpat1	ENSMUSG00000034254	13969.9	14515.2	14213.4	14400.4	15068.3	14766.8	14913.8	14777	14434	13712.2	10526.2	11037.2	8673.1	8141.65	6716.46	6843.52	6996.99	8953.81	9005.07	6664.69	17	34604261	34613449	+	protein_coding	Agpat1
ENSMUSG00000028393	2085.5	-0.779737	0.148637	-5.2459	1.56e-07	1.15e-06	4	62509168	62519918	-	protein_coding	Alad	ENSMUSG00000028393	2604.67	2500.8	2799.89	1625.69	2834.13	3041.46	3220.56	2894.2	1695.89	3442.12	1163.39	1812.37	2126.94	1699.48	1752.88	901.092	1041.99	1800.69	1749.92	1001.92	4	62509168	62519918	-	protein_coding	Alad
ENSMUSG00000066537	72.1983	-0.779684	0.152927	-5.09841	3.43e-07	2.38e-06	7	41395944	41448696	-	protein_coding	Vmn2r57	ENSMUSG00000066537	70.0501	86.5152	66.8497	118.616	64.7062	163.084	65.5347	107.706	83.0866	96.8659	63.3582	55.3721	55.4282	45.7771	56.6328	43.3912	47.3209	51.9429	56.5219	45.2063	7	41395944	41448696	-	protein_coding	Vmn2r57
ENSMUSG00000015092	7483.11	-0.779659	0.0704836	-11.0616	1.93e-28	2.67e-26	2	25557846	25562082	+	protein_coding	Edf1	ENSMUSG00000015092	7957.52	8615.9	9416.89	10045.6	10263.6	10415.9	10917.2	10223.1	8844.11	8093.93	6039.78	6067.51	5634.88	5918.6	5105.17	5027.6	4588.27	6079.63	5585.5	4821.39	2	25557846	25562082	+	protein_coding	Edf1
ENSMUSG00000107512	303.405	-0.779596	0.145813	-5.34654	8.97e-08	6.97e-07	6	77428677	77433509	-	TEC	Gm44433	ENSMUSG00000107512	201.608	318.58	319.764	460.672	318.825	494.014	583.571	345.15	442.206	390.842	227.216	293.898	196.347	226.978	179.946	168.503	155.88	295.498	217.044	231.567	6	77428677	77433509	-	TEC	Gm44433
ENSMUSG00000090958	274.419	-0.779455	0.144367	-5.39912	6.7e-08	5.31e-07	7	98489282	98502181	+	protein_coding	Lrrc32	ENSMUSG00000090958	509.999	290.08	378.815	321.827	320.002	320.216	355.76	228.468	417.28	360.431	261.079	194.867	182.255	125.887	176.292	164.887	158.664	175.452	345.914	200.199	7	98489282	98502181	+	protein_coding	Lrrc32
ENSMUSG00000042106	97.5916	-0.779274	0.10954	-7.11403	1.13e-12	1.94e-11	9	107984222	107985879	-	protein_coding	Inka1	ENSMUSG00000042106	115.326	132.317	158.211	137.006	112.942	140.466	138.351	117.498	98.7808	90.1078	67.7277	66.0206	84.5515	72.4805	69.4208	71.5956	63.0945	88.8802	58.7828	68.2707	9	107984222	107985879	-	protein_coding	Inka1
ENSMUSG00000027581	31903	-0.779175	0.0752958	-10.3482	4.27e-25	4.04e-23	2	181306458	181314500	-	protein_coding	Stmn3	ENSMUSG00000027581	34562.9	36975.6	38575.6	41260.1	44395.5	44339.8	46543.1	44512.1	34996.1	38077.3	28710	25924.8	23929	24538.4	20846.3	22137.5	18451.4	25225.8	22813.4	21246	2	181306458	181314500	-	protein_coding	Stmn3
ENSMUSG00000054690	252.628	-0.779072	0.141763	-5.49558	3.89e-08	3.19e-07	3	137341066	137432185	+	protein_coding	Emcn	ENSMUSG00000054690	316.934	369.471	401.098	403.663	291.766	330.93	346.398	280.689	271.416	210.627	216.292	232.137	172.861	180.247	190.907	104.139	119.694	138.515	269.044	205.735	3	137341066	137432185	+	protein_coding	Emcn
ENSMUSG00000022351	4141.15	-0.778971	0.082688	-9.42061	4.48e-21	2.63e-19	15	59315076	59331192	+	protein_coding	Sqle	ENSMUSG00000022351	6465.97	5358.85	5012.61	4680.29	5983.56	4594.92	4960.87	4859.02	4885.49	5697.06	3732.67	3731.23	3346.36	2978.37	2753.08	2750.28	2965.44	2764.52	2340.01	2962.39	15	59315076	59331192	+	protein_coding	Sqle
ENSMUSG00000099492	162.425	-0.778943	0.111693	-6.97394	3.08e-12	4.97e-11	1	29484603	29485915	-	processed_pseudogene	Gm5525	ENSMUSG00000099492	157.186	181.173	231.746	240.911	202.354	240.46	237.173	205.621	186.483	180.216	139.825	174.635	124.009	110.628	102.304	95.4607	115.055	108.503	124.348	90.4125	1	29484603	29485915	-	processed_pseudogene	Gm5525
ENSMUSG00000059824	6163.02	-0.778886	0.0827973	-9.40715	5.1e-21	2.98e-19	7	45705087	45710203	+	protein_coding	Dbp	ENSMUSG00000059824	6841.85	6707.47	8048.7	6751.01	8809.46	7736.37	8333.31	7141.26	9362.02	8399.17	4965.97	4217.87	5520.27	4159.04	3819.06	4277.65	4901.88	4103.49	5456.63	3707.84	7	45705087	45710203	+	protein_coding	Dbp
ENSMUSG00000087011	15.3284	-0.778085	0.246994	-3.15022	0.00163148	0.00526808	4	124957646	124987009	-	lncRNA	Gm12930	ENSMUSG00000087011	16.2311	8.14261	24.5116	13.7926	16.4707	29.7598	24.9656	27.7425	21.2333	18.0216	4.36953	9.58364	6.57622	14.3054	16.4418	5.7855	6.49502	20.7772	15.8261	5.53546	4	124957646	124987009	-	lncRNA	Gm12930
ENSMUSG00000082935	301.669	-0.778064	0.0783451	-9.93124	3.04e-23	2.37e-21	1	21511932	21513056	-	processed_pseudogene	Gm7658	ENSMUSG00000082935	310.954	417.309	396.642	401.824	414.12	383.307	376.564	416.138	333.27	376.2	209.737	264.082	206.681	225.071	242.059	250.223	235.676	173.143	195.566	204.812	1	21511932	21513056	-	processed_pseudogene	Gm7658
ENSMUSG00000024747	110.848	-0.777161	0.190487	-4.07986	4.51e-05	0.000208043	19	20692952	20727562	-	protein_coding	Aldh1a7	ENSMUSG00000024747	162.311	173.03	147.069	184.821	172.942	173.798	120.667	93.0191	88.6258	112.635	113.608	59.6315	69.5201	92.508	45.6716	125.111	30.6194	122.354	64.435	64.5804	19	20692952	20727562	-	protein_coding	Aldh1a7
ENSMUSG00000114135	4.88821	-0.777012	0.314141	-2.47345	0.0133816	0.0336563	12	36539356	36539812	+	processed_pseudogene	Gm7252	ENSMUSG00000114135	1.70854	6.10696	8.91329	2.75852	4.70591	13.0943	8.32186	11.4234	3.69274	7.88443	1.09238	0	1.87892	3.81476	3.65373	4.33912	0	4.61715	7.91307	1.84515	12	36539356	36539812	+	processed_pseudogene	Gm7252
ENSMUSG00000059518	2932.18	-0.776788	0.0958156	-8.10712	5.18e-16	1.5e-14	5	136982163	136988021	-	protein_coding	Znhit1	ENSMUSG00000059518	3083.06	3490.13	3607.66	4010.88	4405.91	4098.53	4423.07	3910.07	3195.14	2967.92	2656.67	2748.37	2116.6	2050.43	2012.29	1716.12	1977.27	2047.71	2463.23	1662.48	5	136982163	136988021	-	protein_coding	Znhit1
ENSMUSG00000108429	1.73297	-0.776472	0.319296	-2.43182	0.015023	0.0371781	7	95474945	95475312	+	processed_pseudogene	Gm44603	ENSMUSG00000108429	1.70854	2.03565	2.22832	1.83901	0	5.95197	1.04023	6.52766	4.61592	2.25269	0	0	0	0	0.913432	0	1.85572	0	0	3.69031	7	95474945	95475312	+	processed_pseudogene	Gm44603
ENSMUSG00000023132	3.76361	-0.776145	0.316637	-2.45121	0.0142376	0.0355156	13	113093824	113100981	-	protein_coding	Gzma	ENSMUSG00000023132	0	4.0713	13.3699	5.51704	8.23534	17.8559	4.16093	6.52766	1.84637	0	2.18477	8.51879	0	0	0	0.723187	0	0	2.26088	0	13	113093824	113100981	-	protein_coding	Gzma
ENSMUSG00000060438	588.185	-0.77613	0.0992229	-7.82208	5.2e-15	1.31e-13	3	95622277	95622772	+	processed_pseudogene	Rps10-ps1	ENSMUSG00000060438	513.416	656.498	852.334	822.958	747.063	917.794	899.801	844.516	612.995	594.711	458.801	463.209	470.67	470.169	370.853	394.86	410.114	400.538	490.61	371.798	3	95622277	95622772	+	processed_pseudogene	Rps10-ps1
ENSMUSG00000033307	6487.9	-0.776105	0.0656818	-11.8161	3.22e-32	6.8e-30	10	75859352	75860240	-	protein_coding	Mif	ENSMUSG00000033307	7079.33	7491.2	8407.46	8377.62	9067.11	8876.77	9284.08	8661.38	7720.6	7120.77	5540.57	5324.24	4798.76	5074.59	4666.72	4404.93	4126.19	5029.23	4435.84	4270.61	10	75859352	75860240	-	protein_coding	Mif
ENSMUSG00000024395	1020.71	-0.776071	0.134755	-5.75914	8.45e-09	7.73e-08	18	31922289	31958619	+	protein_coding	Lims2	ENSMUSG00000024395	1300.2	1730.3	1570.97	1220.18	1391.77	1299.91	1412.64	1152.95	1046.89	878.551	943.819	1176.66	675.472	829.71	534.358	439.698	627.233	769.91	730.263	682.707	18	31922289	31958619	+	protein_coding	Lims2
ENSMUSG00000060534	1395.5	-0.776056	0.127322	-6.09522	1.09e-09	1.17e-08	18	71253633	72351069	-	protein_coding	Dcc	ENSMUSG00000060534	1515.47	1982.73	1331.42	1706.6	1945.89	1621.32	1952.52	1658.84	2234.11	1812.29	1275.9	1465.23	1381.01	757.23	788.292	786.105	823.94	1110.42	1076.18	684.552	18	71253633	72351069	-	protein_coding	Dcc
ENSMUSG00000027560	2316.76	-0.775263	0.118834	-6.5239	6.85e-11	8.89e-10	2	170731806	170879769	+	protein_coding	Dok5	ENSMUSG00000027560	3126.63	2697.24	3080.66	2845.87	3030.6	3256.92	3265.29	2504.99	2370.74	3272.04	2640.29	2107.34	1838.52	1878.77	1544.61	1201.94	1418.7	1650.63	1047.92	1555.46	2	170731806	170879769	+	protein_coding	Dok5
ENSMUSG00000001525	38738.7	-0.774909	0.0719335	-10.7726	4.64e-27	5.53e-25	17	35833920	35838306	-	protein_coding	Tubb5	ENSMUSG00000001525	48932.6	48764	48934	50127.8	53133.2	48976.4	52029.3	48331.6	44600.9	46366.1	36195	32369.3	29009.6	31625.3	24205.9	29038.9	22560.9	28625.2	23920.1	27027.8	17	35833920	35838306	-	protein_coding	Tubb5
ENSMUSG00000036596	16.5373	-0.774736	0.27208	-2.84745	0.00440707	0.0127008	5	35502217	35525698	-	protein_coding	Cpz	ENSMUSG00000036596	25.6281	20.3565	35.6532	23.9072	15.2942	4.76158	16.6437	19.583	31.3883	27.0323	10.9238	17.0376	22.5471	7.62952	3.65373	7.23187	24.1244	4.61715	9.04351	3.69031	5	35502217	35525698	-	protein_coding	Cpz
ENSMUSG00000030792	1073.88	-0.774301	0.197962	-3.91135	9.18e-05	0.000396809	7	45207518	45212147	-	protein_coding	Dkkl1	ENSMUSG00000030792	740.652	977.113	1201.07	1843.61	1380.01	1617.75	1761.11	2029.29	1014.58	1290.79	858.613	583.537	614.407	962.273	791.945	662.44	290.42	1321.66	729.133	807.255	7	45207518	45212147	-	protein_coding	Dkkl1
ENSMUSG00000086939	23.9045	-0.774004	0.207324	-3.7333	0.000188987	0.000762748	2	33489781	33503632	+	lncRNA	Gm13530	ENSMUSG00000086939	17.0854	27.4813	41.224	27.5852	45.8826	41.6638	38.4886	23.6628	17.5405	29.285	21.8477	9.58364	16.9103	17.1664	22.8358	8.67825	15.7736	12.6972	21.4783	21.2193	2	33489781	33503632	+	lncRNA	Gm13530
ENSMUSG00000032492	609.69	-0.773988	0.0838683	-9.22861	2.74e-20	1.42e-18	9	110722084	110747145	-	protein_coding	Pth1r	ENSMUSG00000032492	644.974	678.89	767.657	767.787	911.77	776.137	896.681	615.232	776.399	889.814	407.459	498.349	524.219	445.373	400.083	539.498	432.383	402.846	416.001	402.243	9	110722084	110747145	-	protein_coding	Pth1r
ENSMUSG00000090356	25.2433	-0.773845	0.202281	-3.82559	0.000130457	0.000544762	16	21152654	21154000	-	protein_coding	Teddm3	ENSMUSG00000090356	39.2964	21.3743	31.1965	29.4242	28.2354	60.7101	29.1265	28.5585	25.8492	32.6641	19.6629	18.1024	20.6681	29.5644	23.7492	13.0174	15.7736	19.6229	9.04351	9.22577	16	21152654	21154000	-	protein_coding	Teddm3
ENSMUSG00000018486	7.86779	-0.773709	0.290944	-2.65931	0.00783009	0.0211093	11	103727363	103749821	-	protein_coding	Wnt9b	ENSMUSG00000018486	13.6683	7.12478	15.5983	7.35605	7.05886	9.52315	15.6035	22.8468	7.38548	0	6.5543	5.32424	5.63676	7.62952	1.82686	5.7855	3.71144	6.92573	2.26088	5.53546	11	103727363	103749821	-	protein_coding	Wnt9b
ENSMUSG00000052087	3487.83	-0.773126	0.0783328	-9.86976	5.63e-23	4.2e-21	13	55369731	55384687	+	protein_coding	Rgs14	ENSMUSG00000052087	4172.25	4164.94	5109.55	4580.06	4621.2	3746.17	4284.72	4780.69	4822.72	3857.74	2406.52	2242.57	2900.11	2714.2	2741.21	3311.48	2655.53	2220.85	2229.22	2194.81	13	55369731	55384687	+	protein_coding	Rgs14
ENSMUSG00000102796	676.126	-0.773033	0.0994428	-7.77364	7.63e-15	1.86e-13	4	132104829	132109363	-	TEC	Gm37711	ENSMUSG00000102796	1108.84	1075.84	822.251	700.664	868.24	783.279	678.232	854.307	854.869	821.107	581.148	600.575	433.091	515.946	422.919	466.456	367.432	524.047	591.219	452.063	4	132104829	132109363	-	TEC	Gm37711
ENSMUSG00000062252	240.315	-0.772863	0.125037	-6.18109	6.37e-10	7.02e-09	17	28575640	28585679	+	protein_coding	Lhfpl5	ENSMUSG00000062252	183.668	291.098	329.792	239.072	338.825	285.695	328.714	333.726	455.13	269.197	164.95	210.84	223.592	172.618	139.755	167.779	138.251	165.063	208.001	160.528	17	28575640	28585679	+	protein_coding	Lhfpl5
ENSMUSG00000112466	348.775	-0.772853	0.150967	-5.11936	3.07e-07	2.15e-06	10	107199911	107205775	-	lncRNA	Gm29674	ENSMUSG00000112466	539.044	299.241	383.272	583.886	340.002	623.766	461.863	392.475	347.118	479.824	430.399	290.704	189.771	292.783	179.033	220.572	163.303	289.726	226.088	242.638	10	107199911	107205775	-	lncRNA	Gm29674
ENSMUSG00000030592	2285.11	-0.772346	0.113686	-6.79366	1.09e-11	1.62e-10	7	29003343	29125179	-	protein_coding	Ryr1	ENSMUSG00000030592	2140.8	3457.55	2712.98	3273.44	2625.9	2959.32	3644.98	2652.68	3413.94	2127.67	1290.1	1535.51	1465.56	2147.71	1531.83	2027.09	1345.4	1973.83	2023.48	1352.5	7	29003343	29125179	-	protein_coding	Ryr1
ENSMUSG00000020773	365.794	-0.77141	0.0904232	-8.53111	1.45e-17	5.2e-16	11	116105751	116127210	-	protein_coding	Trim47	ENSMUSG00000020773	495.476	517.056	501.373	460.672	455.297	432.113	533.639	328.015	495.75	412.243	292.759	265.147	260.231	341.421	300.519	241.545	208.768	248.172	249.827	275.85	11	116105751	116127210	-	protein_coding	Trim47
ENSMUSG00000112039	180.891	-0.771289	0.167908	-4.59351	4.36e-06	2.47e-05	10	108698763	108700160	-	protein_coding	Gm5136	ENSMUSG00000112039	97.3867	152.674	203.892	313.552	208.236	361.88	357.84	217.861	206.793	194.858	160.58	122.458	120.251	153.544	117.833	98.3535	118.766	166.217	142.435	102.406	10	108698763	108700160	-	protein_coding	Gm5136
ENSMUSG00000093507	57.7178	-0.770639	0.216634	-3.55733	0.000374642	0.00141115	3	96254618	96256277	-	lncRNA	Gm20627	ENSMUSG00000093507	46.9848	51.9091	36.7673	87.3531	23.5295	71.4236	104.023	101.179	124.63	99.1186	42.6029	47.9182	60.1255	45.7771	28.3164	19.5261	33.403	48.4801	40.6958	40.5934	3	96254618	96256277	-	lncRNA	Gm20627
ENSMUSG00000059857	1630.8	-0.770614	0.119767	-6.43428	1.24e-10	1.54e-09	3	109780039	110144011	-	protein_coding	Ntng1	ENSMUSG00000059857	1736.73	2023.44	2012.18	1830.74	1891.77	2053.43	2505.92	2175.34	2425.21	2054.46	1190.7	1052.07	1816.92	1110.1	1806.77	916.278	1051.27	963.83	1151.92	846.925	3	109780039	110144011	-	protein_coding	Ntng1
ENSMUSG00000022844	271.213	-0.770503	0.0946742	-8.13847	4e-16	1.17e-14	16	35397311	35490873	-	protein_coding	Pdia5	ENSMUSG00000022844	351.105	354.203	332.02	369.641	274.119	349.976	362.001	329.647	411.74	296.229	182.428	269.407	237.684	188.831	168.071	168.503	182.788	241.246	177.479	177.135	16	35397311	35490873	-	protein_coding	Pdia5
ENSMUSG00000105700	699.611	-0.770428	0.213682	-3.60549	0.000311567	0.00119449	5	49408791	49411832	-	TEC	Gm42772	ENSMUSG00000105700	272.512	529.27	726.433	1350.75	807.063	1342.76	1651.89	839.62	822.558	717.483	514.512	744.329	380.482	616.084	358.979	467.902	416.609	500.961	447.654	484.353	5	49408791	49411832	-	TEC	Gm42772
ENSMUSG00000114491	9.7955	-0.770229	0.271583	-2.83607	0.00456726	0.0131176	13	39791437	39844840	+	lncRNA	A230103O09Rik	ENSMUSG00000114491	10.2512	6.10696	6.68497	15.6316	10.5883	22.6175	15.6035	12.2394	21.2333	9.01078	10.9238	12.7782	6.57622	6.67583	1.82686	7.95506	1.85572	4.61715	9.04351	3.69031	13	39791437	39844840	+	lncRNA	A230103O09Rik
ENSMUSG00000024256	1859.21	-0.770105	0.13996	-5.5023	3.75e-08	3.08e-07	17	93199016	93206537	+	protein_coding	Adcyap1	ENSMUSG00000024256	2964.32	2837.7	2577.06	2319.91	1976.48	2329.6	2218.82	1961.56	1700.51	2785.46	2040.57	1842.19	1189.36	1304.65	945.402	934.358	1271.17	1718.73	795.829	1470.59	17	93199016	93206537	+	protein_coding	Adcyap1
ENSMUSG00000048400	19.6967	-0.769294	0.190359	-4.04128	5.32e-05	0.000241566	8	95559068	95576340	-	protein_coding	Prss54	ENSMUSG00000048400	26.4824	17.303	22.2832	23.9072	23.5295	24.9983	28.0863	33.4542	23.0796	29.285	12.0162	11.7133	9.39461	10.4906	17.3552	15.9101	11.1343	19.6229	23.7392	10.1483	8	95559068	95576340	-	protein_coding	Prss54
ENSMUSG00000002274	3591.12	-0.769221	0.0961575	-7.9996	1.25e-15	3.41e-14	17	25793220	25797136	-	protein_coding	Metrn	ENSMUSG00000002274	4010.8	4968.01	4387.57	4807.18	4722.38	4916.33	4702.89	4163.83	4261.42	4523.41	3303.37	3447.98	3313.48	2403.3	1881.67	1979.36	2597.08	2368.6	2733.4	2330.43	17	25793220	25797136	-	protein_coding	Metrn
ENSMUSG00000083306	27.0145	-0.769094	0.246418	-3.12109	0.00180181	0.00574879	2	102311913	102312207	-	processed_pseudogene	Gm13868	ENSMUSG00000083306	8.5427	26.4635	21.1691	50.5728	31.7649	61.9005	61.3737	40.7979	29.5419	22.5269	8.73906	21.297	20.6681	11.4443	18.2686	13.0174	35.2587	18.4686	13.5653	24.9096	2	102311913	102312207	-	processed_pseudogene	Gm13868
ENSMUSG00000043168	192.885	-0.769065	0.18774	-4.09643	4.2e-05	0.000195038	18	21651447	21656105	+	lncRNA	4930426D05Rik	ENSMUSG00000043168	195.628	272.777	420.039	269.415	261.178	186.892	192.443	278.241	181.867	221.89	103.776	79.8636	202.923	247.959	83.1223	203.939	157.736	113.12	107.392	77.4964	18	21651447	21656105	+	lncRNA	4930426D05Rik
ENSMUSG00000109097	13.9416	-0.768097	0.251767	-3.05082	0.00228217	0.00709038	7	70178867	70337852	-	lncRNA	Gm29683	ENSMUSG00000109097	17.0854	24.4278	31.1965	10.1146	27.059	10.7135	8.32186	19.583	24.0028	11.2635	7.64668	7.45394	13.1524	11.4443	21.0089	7.23187	7.42288	4.61715	6.78263	8.30319	7	70178867	70337852	-	lncRNA	Gm29683
ENSMUSG00000104213	16.0297	-0.767761	0.276676	-2.77495	0.005521	0.0155266	12	113406603	113416324	-	IG_C_gene	Ighd	ENSMUSG00000104213	17.0854	13.2317	8.91329	35.8607	22.3531	27.3791	15.6035	31.0064	14.771	27.0323	25.1248	22.3618	12.213	3.81476	7.30746	3.61594	3.71144	8.08001	4.52175	16.6064	12	113406603	113416324	-	IG_C_gene	Ighd
ENSMUSG00000101501	6.095	-0.767296	0.294107	-2.6089	0.00908341	0.0240201	1	52522238	52522701	+	processed_pseudogene	Rps27a-ps1	ENSMUSG00000101501	7.68843	1.01783	13.3699	13.7926	8.23534	15.4751	8.32186	4.07979	5.53911	5.63174	3.27715	5.32424	3.75784	5.72214	5.48059	5.7855	1.85572	2.30858	3.39132	1.84515	1	52522238	52522701	+	processed_pseudogene	Rps27a-ps1
ENSMUSG00000041930	910.13	-0.767292	0.100864	-7.60716	2.8e-14	6.23e-13	5	114568015	114613220	+	protein_coding	Fam222a	ENSMUSG00000041930	1045.63	1256	1137.56	997.664	1657.66	952.315	1051.68	991.388	1341.39	1092.56	753.744	803.961	772.237	539.789	590.99	745.606	681.977	684.493	535.828	570.152	5	114568015	114613220	+	protein_coding	Fam222a
ENSMUSG00000076609	7.21833	-0.767029	0.320677	-2.39191	0.016761	0.0408295	6	70726434	70726966	+	IG_C_gene	Igkc	ENSMUSG00000076609	4.27135	3.05348	33.4249	9.19506	3.52943	5.95197	9.3621	11.4234	14.771	7.88443	9.83144	6.38909	3.75784	5.72214	0	7.95506	0	2.30858	0	5.53546	6	70726434	70726966	+	IG_C_gene	Igkc
ENSMUSG00000115299	4.7194	-0.766899	0.311147	-2.46475	0.0137108	0.0343692	14	34218075	34218385	+	processed_pseudogene	Gm49168	ENSMUSG00000115299	1.70854	7.12478	6.68497	5.51704	11.7648	9.52315	4.16093	4.89574	7.38548	6.75808	9.83144	0	1.87892	0	1.82686	2.89275	3.71144	4.61715	2.26088	1.84515	14	34218075	34218385	+	processed_pseudogene	Gm49168
ENSMUSG00000020866	8803.05	-0.766872	0.0942765	-8.13428	4.14e-16	1.21e-14	11	94408390	94474198	-	protein_coding	Cacna1g	ENSMUSG00000020866	16627.5	10648.5	10045.3	9187.7	9360.05	10814.7	10986.9	11425.8	10538.2	11728.7	7562.57	5693.75	6364.85	6575.69	6066.1	7383.02	5471.59	7932.27	5515.41	6132.37	11	94408390	94474198	-	protein_coding	Cacna1g
ENSMUSG00000009876	108.444	-0.76685	0.175773	-4.36274	1.28e-05	6.6e-05	2	152754172	152765037	+	protein_coding	Cox4i2	ENSMUSG00000009876	95.6782	132.317	122.558	159.994	172.942	128.563	211.167	155.848	105.243	103.624	90.6678	143.755	35.6995	82.0174	85.8626	70.1492	68.6616	62.3315	93.8264	47.974	2	152754172	152765037	+	protein_coding	Cox4i2
[truncated: 13,125 more rows]
