# Supplementary material for: Reduction of RAD23A extends lifespan and mitigates pathology in TDP-43 mice
Source: bioRxiv preprint, doi:10.1101/2024.09.10.612226, version 1 (2024-09-14)
Supplement: S3 [file 612226_file10.xlsx]

## Sheet: Col_description
Supplemental Figure 3 -Contains differentially expressed genes between Tar4.4;rad23aKD and Tar4.4;rad23SCR.
GeneID	Gene Identifiers
Mean_normalised_counts,	mean normalised counts, averaged over all samples from both conditions
log2FoldChange	the logarithm (to basis 2) of the fold change (See the note in inputs section)
Std_Error	standard error estimate for the log2 fold change estimate
Wald statistic	Wald statistic
pValue	p value for the statistical significance of this change
Adj_pValue	p value adjusted for multiple testing with the Benjamini-Hochberg procedure which controls false discovery rate (FDR)
Tar4.4_rad23a SCR_C1
Tar4.4_rad23a SCR_C2
Tar4.4_rad23a SCR_C3
Tar4.4_rad23a SCR_C4
Tar4.4_rad23a SCR_C5
Tar4.4_rad23a SCR_C6
Tar4.4_rad23a SCR_C7
Tar4.4_rad23a SCR_C8
Tar4.4_rad23a SCR_C9
Tar4.4_rad23a SCR_C10
Tar4.4_rad23a KD_D1
Tar4.4_rad23a KD_D2
Tar4.4_rad23a KD_D3
Tar4.4_rad23a KD_D4
Tar4.4_rad23a KD_D5
Tar4.4_rad23a KD_D6
Tar4.4_rad23a KD_D7
Tar4.4_rad23a KD_D8
Tar4.4_rad23a KD_D9
Tar4.4_rad23a KD_D10

## Sheet: DEG_DvsC
GeneID	Mean_normalised_counts,	log2FoldChange	Std_Error	Wald statistic	pValue	Adj_pValue	Chrom	Start	End	Strand	Transcript	GeneName	GeneID	Tar4.4_rad23a SCR_C1	Tar4.4_rad23a SCR_C2	Tar4.4_rad23a SCR_C3	Tar4.4_rad23a SCR_C4	Tar4.4_rad23a SCR_C5	Tar4.4_rad23a SCR_C6	Tar4.4_rad23a SCR_C7	Tar4.4_rad23a SCR_C8	Tar4.4_rad23a SCR_C9	Tar4.4_rad23a SCR_C10	Tar4.4_rad23a KD_D1	Tar4.4_rad23a KD_D2	Tar4.4_rad23a KD_D3	Tar4.4_rad23a KD_D4	Tar4.4_rad23a KD_D5	Tar4.4_rad23a KD_D6	Tar4.4_rad23a KD_D7	Tar4.4_rad23a KD_D8	Tar4.4_rad23a KD_D9	Tar4.4_rad23a KD_D10	Chrom	Start	End	Strand	Transcript	GeneName
ENSMUSG00000003813	2456.7	-1.63337	0.106999	-15.2653	1.3e-52	3.99e-48	8	84834018	84840665	-	protein_coding	Rad23a	ENSMUSG00000003813	4390.53	4139.72	4144.22	3563.76	3730.06	3242.08	3412.37	3652.19	3976.43	3501.09	1172.76	846.81	1416.37	868.777	1108.28	1266.8	1186.95	1062.4	767.692	1684.71	8	84834018	84840665	-	protein_coding	Rad23a
ENSMUSG00000021886	29.3765	-1.53821	0.229839	-6.69255	2.19e-11	3.84e-09	12	98268634	98276644	+	protein_coding	Gpr65	ENSMUSG00000021886	12.5015	44.0917	30.2971	69.0396	49.37	71.2909	52.4158	22.4954	110.24	47.8727	4.73366	17.6534	7.83065	6.88413	8.9051	5.77569	14.7562	0	10.5945	0.78213	12	98268634	98276644	+	protein_coding	Gpr65
ENSMUSG00000025229	17.6134	-1.53134	0.220191	-6.9546	3.54e-12	8.47e-10	19	46135684	46148326	-	protein_coding	Pitx3	ENSMUSG00000025229	11.2514	9.79816	11.9024	28.4925	53.5717	49.7378	49.2066	26.4651	20.7511	31.9151	5.91707	5.51668	7.83065	8.26096	3.23822	5.13395	7.37809	6.31755	4.88976	4.69278	19	46135684	46148326	-	protein_coding	Pitx3
ENSMUSG00000032092	20.5757	-1.49104	0.209099	-7.13081	9.98e-13	2.94e-10	9	45039798	45054015	+	protein_coding	Mpzl2	ENSMUSG00000032092	35.0042	26.9449	36.7894	27.3967	19.9581	47.251	34.2307	37.0512	38.9083	30.8513	9.46732	9.93002	4.89416	2.75365	17.8102	12.1931	0	10.5293	4.0748	5.47491	9	45039798	45054015	+	protein_coding	Mpzl2
ENSMUSG00000044177	176.747	-1.4599	0.209662	-6.96308	3.33e-12	8.1e-10	11	94235955	94246005	-	protein_coding	Wfikkn2	ENSMUSG00000044177	155.019	173.917	340.843	138.079	735.298	179.056	385.095	242.156	302.188	190.427	54.4371	49.6501	58.7299	74.3486	90.6701	102.037	31.3569	84.234	86.3857	61.0062	11	94235955	94246005	-	protein_coding	Wfikkn2
ENSMUSG00000082310	62.4186	-1.45888	0.214106	-6.81383	9.5e-12	1.92e-09	4	123838103	123839502	+	processed_pseudogene	Gm12904	ENSMUSG00000082310	22.5027	28.1697	68.1686	116.162	180.673	144.24	106.971	89.9815	92.0831	162.767	9.46732	32.5484	16.6401	34.4206	16.1911	17.9688	21.212	38.9582	18.7441	30.5031	4	123838103	123839502	+	processed_pseudogene	Gm12904
ENSMUSG00000006014	239.768	-1.45343	0.204832	-7.09573	1.29e-12	3.65e-10	1	150449411	150466165	-	protein_coding	Prg4	ENSMUSG00000006014	222.527	238.83	269.428	140.271	366.598	441.009	487.787	265.975	1042.74	344.684	108.874	88.2669	111.587	110.146	67.193	105.246	90.3816	104.24	123.874	65.6989	1	150449411	150466165	-	protein_coding	Prg4
ENSMUSG00000025044	57.3571	-1.45301	0.233438	-6.22441	4.83e-10	4.83e-08	8	39581684	39642673	-	protein_coding	Msr1	ENSMUSG00000025044	22.5027	107.78	27.051	36.1636	119.749	163.306	170.084	31.7582	210.105	127.661	9.46732	7.72335	19.5766	13.7683	1.61911	8.34267	11.9894	12.6351	31.7834	14.0783	8	39581684	39642673	-	protein_coding	Msr1
ENSMUSG00000104875	11.2286	-1.4515	0.230279	-6.30324	2.91e-10	3.19e-08	5	143334634	143335425	+	lncRNA	Gm43397	ENSMUSG00000104875	7.50091	3.67431	10.8204	24.1091	35.7145	24.04	32.0913	14.5558	15.5633	24.4683	0	6.06835	3.91533	6.88413	1.61911	3.85046	2.76678	2.10585	3.25984	1.56426	5	143334634	143335425	+	lncRNA	Gm43397
ENSMUSG00000034533	254.833	-1.45128	0.230433	-6.29806	3.01e-10	3.28e-08	9	119608455	119719322	-	protein_coding	Scn10a	ENSMUSG00000034533	188.773	144.523	350.581	512.866	733.197	495.721	490.997	297.733	604.376	534.047	26.0351	169.362	92.0102	121.161	17.8102	15.4018	100.526	46.3287	66.8267	88.3807	9	119608455	119719322	-	protein_coding	Scn10a
ENSMUSG00000007107	36.2624	-1.43773	0.212014	-6.78132	1.19e-11	2.3e-09	1	172223512	172258414	-	protein_coding	Atp1a4	ENSMUSG00000007107	20.0024	24.4954	56.2661	25.2049	86.1349	75.4357	104.832	34.4047	59.6595	95.7454	11.8341	11.0334	23.492	22.0292	16.1911	11.5514	10.1449	9.47633	17.9291	9.38556	1	172223512	172258414	-	protein_coding	Atp1a4
ENSMUSG00000087265	3.84679	-1.41795	0.231324	-6.12972	8.8e-10	7.78e-08	11	100291670	100293711	+	lncRNA	Gm12349	ENSMUSG00000087265	7.50091	7.34862	7.57428	5.47933	5.25213	2.48689	10.6971	2.64651	15.5633	8.5107	0	1.10334	1.95766	0	0	0	0	0	0.81496	0	11	100291670	100293711	+	lncRNA	Gm12349
ENSMUSG00000048368	86.1861	-1.414	0.14211	-9.95004	2.52e-23	1.29e-19	13	49582461	49592822	+	protein_coding	Omd	ENSMUSG00000048368	85.0103	91.8577	121.189	105.203	118.698	171.596	132.644	124.386	145.258	195.746	30.7688	46.3401	31.3226	52.3194	38.0491	54.5482	32.2791	48.4346	46.4527	51.6206	13	49582461	49592822	+	protein_coding	Omd
ENSMUSG00000015090	43856.9	-1.40224	0.128107	-10.9459	6.96e-28	1.07e-23	2	25466708	25470046	-	protein_coding	Ptgds	ENSMUSG00000015090	55750.5	46966.2	61668.7	59291.9	95086.6	56562.7	71130.3	64405.6	74662.5	65711.1	16289.7	23310.7	25696.3	24477.2	20752.1	26163.9	11022.9	26519	29114.4	22555.9	2	25466708	25470046	-	protein_coding	Ptgds
ENSMUSG00000037254	278.039	-1.37987	0.157548	-8.75837	1.98e-18	3.3e-15	2	10094592	10131396	-	protein_coding	Itih2	ENSMUSG00000037254	317.538	292.72	500.985	329.856	301.472	552.09	473.881	445.938	543.42	417.025	144.377	134.607	77.3277	96.3778	170.006	183.539	66.4028	193.738	125.504	193.968	2	10094592	10131396	-	protein_coding	Itih2
ENSMUSG00000038393	1808.64	-1.37944	0.133764	-10.3125	6.19e-25	3.79e-21	3	96557956	96561883	+	protein_coding	Txnip	ENSMUSG00000038393	1892.73	2654.08	2186.8	2248.72	2655.48	2008.58	2622.93	2686.21	5208.53	2639.38	876.91	837.983	1098.25	1086.32	937.464	1078.77	776.544	767.582	707.385	1202.13	3	96557956	96561883	+	protein_coding	Txnip
ENSMUSG00000066382	10.4095	-1.37689	0.227426	-6.05423	1.41e-09	1.1e-07	9	106514572	106516010	+	protein_coding	Iqcf5	ENSMUSG00000066382	13.7517	11.0229	14.0665	28.4925	16.8068	19.8951	32.0913	15.8791	6.48472	14.8937	2.36683	4.96501	1.95766	4.13048	0	1.28349	3.68904	2.10585	5.70472	8.60343	9	106514572	106516010	+	protein_coding	Iqcf5
ENSMUSG00000085511	123.871	-1.37415	0.219758	-6.25302	4.03e-10	4.17e-08	11	118114854	118118279	+	lncRNA	Gm11738	ENSMUSG00000085511	93.7613	50.2155	86.5632	233.42	274.161	363.086	254.591	191.872	221.778	230.853	22.4849	80.5435	78.3065	63.334	20.2389	29.5202	39.6572	46.3287	51.3425	45.3636	11	118114854	118118279	+	lncRNA	Gm11738
ENSMUSG00000002289	627.979	-1.37368	0.157072	-8.74549	2.22e-18	3.4e-15	17	33773749	33781830	-	protein_coding	Angptl4	ENSMUSG00000002289	508.811	614.834	515.051	865.735	1235.3	988.954	857.907	1079.78	1651.01	1094.69	241.417	346.999	362.168	302.902	303.583	285.576	329.247	252.702	238.783	484.139	17	33773749	33781830	-	protein_coding	Angptl4
ENSMUSG00000039109	182.865	-1.37212	0.190069	-7.2191	5.23e-13	1.72e-10	13	36867177	37050244	-	protein_coding	F13a1	ENSMUSG00000039109	196.274	363.757	228.311	132.6	160.715	332.415	393.653	194.519	517.481	295.747	87.5727	78.3368	43.0686	53.6962	87.4319	94.9781	38.735	105.293	99.4251	153.298	13	36867177	37050244	-	protein_coding	F13a1
ENSMUSG00000019232	3603.42	-1.37107	0.212766	-6.44403	1.16e-10	1.54e-08	3	130617447	130637521	+	protein_coding	Etnppl	ENSMUSG00000019232	4378.03	4638.2	6864.46	4612.5	5636.58	4475.58	7971.47	4431.59	6897.15	7339.42	546.737	1960.63	2106.45	1988.14	265.534	713.619	1581.68	1431.98	2029.25	2199.35	3	130617447	130637521	+	protein_coding	Etnppl
ENSMUSG00000108739	22.5157	-1.3539	0.228314	-5.92998	3.03e-09	2.05e-07	7	35057263	35066733	-	lncRNA	Gm45096	ENSMUSG00000108739	11.2514	6.12385	31.3792	71.2313	59.8743	58.8565	47.0672	15.8791	20.7511	50.0004	3.55024	7.72335	12.7248	13.7683	8.09555	5.13395	6.45583	11.5822	6.51968	2.34639	7	35057263	35066733	-	lncRNA	Gm45096
ENSMUSG00000108354	15.3612	-1.35359	0.229117	-5.90786	3.47e-09	2.27e-07	7	128192049	128203328	-	lncRNA	4931431B13Rik	ENSMUSG00000108354	16.252	4.89908	17.3126	29.5884	44.1179	35.6455	35.3004	9.2628	23.345	40.4258	8.2839	9.93002	0.978832	4.13048	1.61911	2.56697	4.6113	5.26463	9.77952	3.91065	7	128192049	128203328	-	lncRNA	4931431B13Rik
ENSMUSG00000035948	66.6079	-1.34853	0.199799	-6.74941	1.48e-11	2.76e-09	10	106933516	107123668	-	protein_coding	Acss3	ENSMUSG00000035948	41.255	60.0137	133.091	86.5735	111.345	108.594	106.971	58.2233	206.214	120.214	18.9346	45.2368	57.7511	27.5365	10.5242	25.028	29.5123	31.5878	28.5236	25.0282	10	106933516	107123668	-	protein_coding	Acss3
ENSMUSG00000002831	1430.91	-1.33719	0.233178	-5.73462	9.77e-09	5.31e-07	17	56100590	56109803	-	protein_coding	Plin4	ENSMUSG00000002831	612.574	807.123	909.996	2768.16	5699.61	3047.27	3337.49	1581.29	2405.83	3421.3	164.495	562.15	1008.2	777.907	168.387	171.346	289.59	166.362	435.189	283.913	17	56100590	56109803	-	protein_coding	Plin4
ENSMUSG00000069516	306.291	-1.32713	0.167069	-7.9436	1.96e-15	1.28e-12	10	117277330	117282321	-	protein_coding	Lyz2	ENSMUSG00000069516	337.541	373.555	378.714	266.296	343.489	668.145	833.304	248.772	521.372	605.324	170.412	129.642	173.253	122.538	161.101	197.657	100.526	187.421	198.035	108.716	10	117277330	117282321	-	protein_coding	Lyz2
ENSMUSG00000040809	11.8845	-1.32549	0.233334	-5.68066	1.34e-08	6.93e-07	3	106147553	106167564	-	protein_coding	Chil3	ENSMUSG00000040809	10.0012	12.2477	20.5588	30.6843	8.4034	63.0013	19.2548	5.29303	591.407	34.0428	0	2.75834	0	0	4.85733	3.85046	1.84452	4.2117	7.33464	1.56426	3	106147553	106167564	-	protein_coding	Chil3
ENSMUSG00000104728	62.7248	-1.32535	0.19276	-6.87564	6.17e-12	1.36e-09	5	43752908	43754271	-	TEC	Gm42462	ENSMUSG00000104728	45.0054	37.9679	58.4302	106.299	147.06	144.24	85.5767	129.679	132.288	72.341	26.0351	33.6517	34.2591	31.667	34.8109	14.1184	23.9788	20.0056	30.1535	46.9278	5	43752908	43754271	-	TEC	Gm42462
ENSMUSG00000111000	132.537	-1.32304	0.152766	-8.66056	4.69e-18	6.26e-15	9	121775023	121778146	-	TEC	Gm47108	ENSMUSG00000111000	116.264	102.881	129.845	243.282	263.657	266.097	239.615	223.63	156.93	219.151	52.0702	92.1285	80.2642	71.595	55.8593	65.4578	60.8692	66.3343	61.122	83.6879	9	121775023	121778146	-	TEC	Gm47108
ENSMUSG00000030144	6.75839	-1.32123	0.23314	-5.66711	1.45e-08	7.41e-07	6	123262110	123275265	+	protein_coding	Clec4d	ENSMUSG00000030144	2.5003	7.34862	8.65632	4.38347	14.706	25.6979	19.2548	3.96977	25.9389	8.5107	2.36683	1.655	1.95766	0	1.61911	1.28349	3.68904	0	1.62992	0	6	123262110	123275265	+	protein_coding	Clec4d
ENSMUSG00000032484	22.6132	-1.31889	0.212695	-6.20083	5.62e-10	5.42e-08	9	110419746	110423012	+	protein_coding	Ngp	ENSMUSG00000032484	25.003	46.5412	30.2971	59.1768	17.8572	56.3696	22.4639	17.2023	906.564	61.7026	14.201	6.06835	7.83065	5.5073	4.85733	10.2679	13.8339	15.7939	8.96456	10.1677	9	110419746	110423012	+	protein_coding	Ngp
ENSMUSG00000029321	25.5661	-1.31442	0.233467	-5.63001	1.8e-08	8.85e-07	5	103605710	103629403	-	protein_coding	Slc10a6	ENSMUSG00000029321	7.50091	11.0229	12.9845	35.0677	60.9247	71.2909	33.161	37.0512	150.446	22.3406	7.10049	6.62001	11.746	11.0146	8.09555	6.41744	10.1449	5.26463	0	3.12852	5	103605710	103629403	-	protein_coding	Slc10a6
ENSMUSG00000105590	161.278	-1.29908	0.187756	-6.91901	4.55e-12	1.06e-09	5	108550080	108553354	-	TEC	Gm43364	ENSMUSG00000105590	97.5118	96.7568	168.798	252.049	367.649	321.638	310.216	244.803	191.948	385.109	93.4897	97.0935	109.629	90.8705	48.5733	35.9376	83.9257	78.9694	88.0157	62.5704	5	108550080	108553354	-	TEC	Gm43364
ENSMUSG00000101389	40.2504	-1.28934	0.224966	-5.73127	9.97e-09	5.4e-07	19	11375522	11392790	+	protein_coding	Ms4a4a	ENSMUSG00000101389	18.7523	15.922	29.2151	60.2727	40.9666	90.3571	90.9253	54.2535	185.463	63.8303	18.9346	20.4117	8.80948	6.88413	21.858	24.3863	14.7562	16.8468	6.51968	15.6426	19	11375522	11392790	+	protein_coding	Ms4a4a
ENSMUSG00000050108	25.4131	-1.28349	0.212481	-6.04047	1.54e-09	1.19e-07	10	85959339	86011895	-	protein_coding	Bpifc	ENSMUSG00000050108	26.2532	12.2477	23.8049	61.3685	63.0255	43.9351	52.4158	21.1721	45.3931	46.8089	7.10049	16.55	19.5766	11.0146	3.23822	6.41744	11.9894	10.5293	9.77952	15.6426	10	85959339	86011895	-	protein_coding	Bpifc
ENSMUSG00000054545	25.6615	-1.28326	0.230966	-5.55604	2.76e-08	1.28e-06	1	88134808	88218997	+	protein_coding	Ugt1a6a	ENSMUSG00000054545	13.7517	13.4725	24.8869	58.0809	27.3111	92.015	34.2307	22.4954	46.69	92.5539	11.8341	16.55	21.5343	8.26096	3.23822	1.92523	7.37809	4.2117	7.33464	5.47491	1	88134808	88218997	+	protein_coding	Ugt1a6a
ENSMUSG00000105203	24.4105	-1.27669	0.215708	-5.91861	3.25e-09	2.16e-07	10	62577693	62579069	+	lncRNA	4933428P19Rik	ENSMUSG00000105203	13.7517	20.8211	36.7894	47.1223	68.2777	55.5406	48.1369	23.8186	24.642	44.6812	3.55024	21.515	16.6401	8.26096	4.04777	6.41744	11.0671	8.4234	11.4094	13.2962	10	62577693	62579069	+	lncRNA	4933428P19Rik
ENSMUSG00000040533	217.277	-1.27612	0.218627	-5.83696	5.32e-09	3.25e-07	4	130944384	130955475	+	protein_coding	Matn1	ENSMUSG00000040533	142.517	176.367	267.264	147.942	421.221	293.453	482.439	156.144	974.006	364.896	80.4722	102.61	89.0737	150.074	69.6217	103.321	124.505	53.6992	69.2716	76.6488	4	130944384	130955475	+	protein_coding	Matn1
ENSMUSG00000086407	18.594	-1.27308	0.210225	-6.05579	1.4e-09	1.09e-07	2	150606232	150610254	+	lncRNA	Gm14123	ENSMUSG00000086407	15.0018	13.4725	33.5433	48.2181	27.3111	25.6979	36.3701	34.4047	12.9694	41.4897	5.91707	9.37835	7.83065	8.26096	8.9051	3.20872	9.22261	4.2117	16.2992	10.1677	2	150606232	150610254	+	lncRNA	Gm14123
ENSMUSG00000062585	33.8172	-1.2711	0.202504	-6.27691	3.45e-10	3.68e-08	4	135895393	135920207	+	protein_coding	Cnr2	ENSMUSG00000062585	32.5039	36.7431	35.7073	39.4512	44.1179	75.4357	78.0888	50.2838	88.1923	38.2982	21.3015	23.1701	3.91533	13.7683	8.09555	28.2367	9.22261	14.741	16.2992	18.7711	4	135895393	135920207	+	protein_coding	Cnr2
ENSMUSG00000024087	355.464	-1.26708	0.15602	-8.12128	4.61e-16	3.82e-13	17	79701536	79715061	-	protein_coding	Cyp1b1	ENSMUSG00000024087	283.784	427.445	612.435	425.196	647.062	458.417	526.297	539.889	756.119	531.919	217.748	124.125	188.914	121.161	236.39	268.249	94.0706	265.337	172.771	211.957	17	79701536	79715061	-	protein_coding	Cyp1b1
ENSMUSG00000087530	99.9731	-1.26649	0.225271	-5.62206	1.89e-08	9.18e-07	7	128001898	128005190	-	lncRNA	Gm15533	ENSMUSG00000087530	53.7565	28.1697	55.1841	151.23	288.867	348.165	208.593	148.205	153.039	169.15	20.118	57.3735	48.9416	55.073	34.0013	37.2211	29.5123	47.3816	33.4134	32.0673	7	128001898	128005190	-	lncRNA	Gm15533
ENSMUSG00000112124	20.0534	-1.25049	0.214757	-5.82278	5.79e-09	3.49e-07	12	32929150	32929947	-	processed_pseudogene	Gm19056	ENSMUSG00000112124	13.7517	11.0229	17.3126	32.876	46.2187	53.8827	42.7884	31.7582	24.642	36.1705	7.10049	11.585	8.80948	22.0292	4.04777	7.70092	9.22261	4.2117	7.33464	8.60343	12	32929150	32929947	-	processed_pseudogene	Gm19056
ENSMUSG00000092495	44.9315	-1.24972	0.208218	-6.00197	1.95e-09	1.45e-07	15	65857868	65858356	+	lncRNA	Gm20405	ENSMUSG00000092495	28.7535	24.4954	32.4612	69.0396	153.362	87.8702	73.8099	60.8698	84.3014	75.5325	21.3015	21.515	21.5343	22.0292	13.7624	29.5202	8.30035	13.688	23.6338	32.8495	15	65857868	65858356	+	lncRNA	Gm20405
ENSMUSG00000000731	64.4858	-1.24847	0.215209	-5.80119	6.58e-09	3.88e-07	10	78030021	78043610	-	protein_coding	Aire	ENSMUSG00000000731	42.5051	29.3945	47.6098	130.408	182.774	155.845	135.853	68.8094	114.131	94.6816	24.8517	39.1684	50.8992	48.1889	9.71466	21.1775	26.7456	14.741	34.2283	17.989	10	78030021	78043610	-	protein_coding	Aire
ENSMUSG00000008845	215.521	-1.24606	0.158241	-7.87442	3.42e-15	2.02e-12	6	124304655	124330527	+	protein_coding	Cd163	ENSMUSG00000008845	262.532	293.945	337.597	210.406	219.539	348.994	411.838	300.379	440.961	323.407	164.495	134.607	64.6029	56.4499	82.5746	108.455	106.982	126.351	124.689	191.622	6	124304655	124330527	+	protein_coding	Cd163
ENSMUSG00000021922	22.6588	-1.24427	0.217689	-5.71583	1.09e-08	5.84e-07	14	30886475	30902353	+	protein_coding	Itih4	ENSMUSG00000021922	18.7523	28.1697	22.7229	17.5339	30.4623	43.9351	58.834	11.9093	84.3014	38.2982	8.2839	8.82669	15.6613	2.75365	7.28599	9.62615	16.6007	8.4234	11.4094	9.38556	14	30886475	30902353	+	protein_coding	Itih4
ENSMUSG00000031289	24.627	-1.24221	0.193495	-6.41986	1.36e-10	1.73e-08	X	147383475	147429192	-	protein_coding	Il13ra2	ENSMUSG00000031289	17.5021	28.1697	68.1686	40.5471	31.5128	40.6192	19.2548	25.1419	53.1747	45.745	11.8341	15.4467	13.7036	16.5219	12.9529	9.62615	14.7562	6.31755	10.5945	10.9498	X	147383475	147429192	-	protein_coding	Il13ra2
ENSMUSG00000022548	7736.02	-1.23867	0.117503	-10.5416	5.55e-26	4.26e-22	16	31296191	31314808	-	protein_coding	Apod	ENSMUSG00000022548	6894.58	6979.96	11479.4	10716.5	13733.3	10928.2	14829.4	9919.14	14405.2	10783.1	4932.47	5321.39	4124.8	4151.13	3876.15	4238.72	3439.11	4127.47	5332.28	4508.2	16	31296191	31314808	-	protein_coding	Apod
ENSMUSG00000078597	8.93462	-1.23614	0.227868	-5.42479	5.8e-08	2.25e-06	4	115411623	115439034	+	protein_coding	Cyp4a12b	ENSMUSG00000078597	5.0006	14.6972	12.9845	6.5752	18.9077	22.382	31.0216	13.2326	7.78167	10.6384	4.73366	3.86168	3.91533	5.5073	1.61911	1.28349	1.84452	6.31755	3.25984	3.12852	4	115411623	115439034	+	protein_coding	Cyp4a12b
ENSMUSG00000089997	260.969	-1.22965	0.225305	-5.45773	4.82e-08	1.95e-06	6	87675589	87722801	-	protein_coding	1810020O05Rik	ENSMUSG00000089997	158.769	83.2843	283.495	461.36	593.49	893.623	653.592	332.138	261.983	431.918	73.3717	200.255	204.576	130.798	49.3828	78.2927	92.2261	72.6518	95.3503	68.8275	6	87675589	87722801	-	protein_coding	1810020O05Rik
ENSMUSG00000114165	20.3386	-1.22716	0.217424	-5.6441	1.66e-08	8.25e-07	13	64152580	64154596	+	TEC	Gm47513	ENSMUSG00000114165	20.0024	11.0229	18.3947	38.3553	39.9162	62.1723	28.8822	27.7884	22.0481	46.8089	3.55024	8.27502	20.5555	16.5219	6.47644	8.34267	7.37809	4.2117	10.5945	5.47491	13	64152580	64154596	+	TEC	Gm47513
ENSMUSG00000064689	5.29571	-1.22124	0.23184	-5.26758	1.38e-07	4.54e-06	7	16953394	16953501	-	snRNA	Gm25815	ENSMUSG00000064689	3.75045	3.67431	6.49224	6.5752	15.7564	10.7765	8.55767	2.64651	24.642	11.7022	0	2.75834	0	4.13048	0	0.641744	0.922261	2.10585	0	0.78213	7	16953394	16953501	-	snRNA	Gm25815
ENSMUSG00000109293	302.526	-1.21674	0.198514	-6.12925	8.83e-10	7.78e-08	3	89361974	89377549	+	protein_coding	Dcst2	ENSMUSG00000109293	202.524	161.67	327.858	561.084	741.6	612.605	647.174	367.866	319.048	604.26	127.809	191.429	248.623	185.872	88.2415	127.065	144.795	138.986	140.173	111.845	3	89361974	89377549	+	protein_coding	Dcst2
ENSMUSG00000072963	6.57866	-1.21664	0.233537	-5.20962	1.89e-07	5.89e-06	11	53454803	53457110	-	lncRNA	Gm10447	ENSMUSG00000072963	6.25075	7.34862	4.32816	5.47933	19.9581	10.7765	17.1153	9.2628	6.48472	25.5321	2.36683	0	3.91533	0	3.23822	1.28349	1.84452	0	3.25984	3.12852	11	53454803	53457110	-	lncRNA	Gm10447
ENSMUSG00000023393	108.833	-1.21609	0.183043	-6.64372	3.06e-11	4.96e-09	2	180725262	180742280	+	protein_coding	Slc17a9	ENSMUSG00000023393	82.51	61.2385	96.3016	190.681	265.758	320.809	167.944	170.7	115.428	136.171	50.8868	59.5801	68.5182	64.7108	52.6211	52.623	47.9576	45.2758	64.3818	62.5704	2	180725262	180742280	+	protein_coding	Slc17a9
ENSMUSG00000024105	4.43337	-1.21432	0.233473	-5.20111	1.98e-07	6.09e-06	17	66554504	66594621	-	protein_coding	Themis3	ENSMUSG00000024105	12.5015	4.89908	6.49224	8.76693	4.2017	11.6055	6.41826	7.93954	5.18778	9.57454	0	2.20667	0	0	0	1.28349	1.84452	1.05293	0	4.69278	17	66554504	66594621	-	protein_coding	Themis3
ENSMUSG00000108333	41.8471	-1.20607	0.20229	-5.96209	2.49e-09	1.76e-07	7	35056026	35056379	+	lncRNA	Gm45095	ENSMUSG00000108333	25.003	30.6192	29.2151	75.6148	139.707	82.8964	62.0431	67.4861	44.0961	72.341	23.6683	20.4117	32.3014	28.9133	19.4293	17.9688	11.9894	22.1114	15.4842	15.6426	7	35056026	35056379	+	lncRNA	Gm45095
ENSMUSG00000118358	25.0718	-1.20604	0.221107	-5.45454	4.91e-08	1.97e-06	18	35888768	35890337	-	lncRNA	Gm36315	ENSMUSG00000118358	21.2526	26.9449	24.8869	52.6016	51.4708	56.3696	68.4614	19.8489	15.5633	54.2557	5.91707	15.4467	17.619	8.26096	6.47644	1.92523	10.1449	15.7939	20.374	7.8213	18	35888768	35890337	-	lncRNA	Gm36315
ENSMUSG00000036814	874.495	-1.2047	0.111836	-10.7721	4.66e-27	4.76e-23	9	123634769	123678885	-	protein_coding	Slc6a20a	ENSMUSG00000036814	890.107	919.802	1314.68	1238.33	1336.14	1489.65	1228.03	1451.61	1254.15	1274.48	397.627	404.924	695.949	470.874	516.496	682.815	360.604	539.098	523.204	501.346	9	123634769	123678885	-	protein_coding	Slc6a20a
ENSMUSG00000023267	42.4909	-1.20353	0.229586	-5.24219	1.59e-07	5.1e-06	4	33062998	33095865	+	protein_coding	Gabrr2	ENSMUSG00000023267	13.7517	48.9908	21.6408	39.4512	186.976	55.5406	105.901	41.021	66.1442	106.384	5.91707	17.1017	35.2379	16.5219	26.7153	18.6106	3.68904	21.0585	9.77952	9.38556	4	33062998	33095865	+	protein_coding	Gabrr2
ENSMUSG00000054901	239.925	-1.20164	0.161682	-7.43211	1.07e-13	4.2e-11	17	80307406	80400081	+	protein_coding	Arhgef33	ENSMUSG00000054901	212.526	159.22	215.326	430.676	488.448	527.221	492.066	284.5	263.28	404.258	144.377	164.949	130.185	101.885	103.623	137.975	110.671	143.198	121.429	162.683	17	80307406	80400081	+	protein_coding	Arhgef33
ENSMUSG00000107015	25.4262	-1.20045	0.21397	-5.61038	2.02e-08	9.68e-07	5	31581078	31581709	+	TEC	2900076G11Rik	ENSMUSG00000107015	17.5021	17.1468	33.5433	52.6016	43.0674	60.5144	71.6705	33.0814	23.345	37.2343	8.2839	20.9634	18.5978	15.1451	4.04777	4.49221	11.0671	14.741	8.96456	12.5141	5	31581078	31581709	+	TEC	2900076G11Rik
ENSMUSG00000032068	15.1128	-1.1993	0.227888	-5.26266	1.42e-07	4.64e-06	9	50494524	50505482	+	protein_coding	Plet1	ENSMUSG00000032068	7.50091	6.12385	12.9845	19.7256	55.6725	41.4482	35.3004	19.8489	24.642	18.0852	4.73366	4.96501	0.978832	11.0146	8.09555	7.05918	4.6113	4.2117	9.77952	5.47491	9	50494524	50505482	+	protein_coding	Plet1
ENSMUSG00000041559	1631.84	-1.1977	0.148598	-8.06001	7.63e-16	5.85e-13	1	134037253	134048277	+	protein_coding	Fmod	ENSMUSG00000041559	2117.76	1669.36	2784.09	2298.03	2486.36	2405.65	2553.4	2568.44	2273.54	2300.02	740.817	1134.23	573.595	421.309	889.701	1225.09	565.346	1358.27	1292.53	979.227	1	134037253	134048277	+	protein_coding	Fmod
ENSMUSG00000070806	31.2936	-1.19701	0.196682	-6.08604	1.16e-09	9.48e-08	4	119422813	119467444	+	protein_coding	Zmynd12	ENSMUSG00000070806	28.7535	19.5963	42.1996	44.9305	64.076	62.1723	91.995	30.4349	36.3145	47.8727	16.5678	27.5834	14.6825	12.3914	9.71466	18.6106	13.8339	11.5822	12.2244	20.3354	4	119422813	119467444	+	protein_coding	Zmynd12
ENSMUSG00000018566	307.749	-1.19679	0.219423	-5.45425	4.92e-08	1.97e-06	11	69942538	69948188	-	protein_coding	Slc2a4	ENSMUSG00000018566	182.522	127.376	367.894	587.385	661.768	949.993	601.177	393.007	287.922	615.962	85.2058	217.909	268.2	165.219	88.2415	64.1744	130.961	132.669	111.649	115.755	11	69942538	69948188	-	protein_coding	Slc2a4
ENSMUSG00000029304	322.003	-1.18505	0.231341	-5.12255	3.01e-07	8.46e-06	5	104435117	104441050	+	protein_coding	Spp1	ENSMUSG00000029304	277.533	778.953	391.699	307.939	447.481	296.769	367.98	296.41	1771.63	296.811	110.058	122.47	207.512	139.059	29.9535	26.3115	92.2261	128.457	204.555	146.258	5	104435117	104441050	+	protein_coding	Spp1
ENSMUSG00000029843	632.386	-1.18313	0.152725	-7.74679	9.42e-15	4.98e-12	6	35267956	35308131	-	protein_coding	Slc13a4	ENSMUSG00000029843	870.105	897.756	1059.32	732.039	1010.51	882.847	868.604	988.473	1041.45	731.921	289.937	295.142	254.496	224.423	448.493	621.208	154.94	506.457	407.48	362.126	6	35267956	35308131	-	protein_coding	Slc13a4
ENSMUSG00000039004	738.778	-1.17979	0.163641	-7.20964	5.61e-13	1.81e-10	13	38345106	38500302	+	protein_coding	Bmp6	ENSMUSG00000039004	950.115	1083.92	1468.33	931.487	1119.75	1043.67	1223.75	1045.37	927.316	878.73	433.13	408.234	254.496	172.103	469.542	739.93	192.753	586.479	451.488	394.976	13	38345106	38500302	+	protein_coding	Bmp6
ENSMUSG00000027322	46.1593	-1.17811	0.184572	-6.38294	1.74e-10	2.1e-08	2	131069219	131086765	-	protein_coding	Siglec1	ENSMUSG00000027322	37.5045	57.5642	43.2816	64.6561	79.8323	77.9226	97.3435	54.2535	95.9739	69.1495	9.46732	24.2734	34.2591	20.6524	14.572	16.6853	16.6007	42.117	34.2283	32.8495	2	131069219	131086765	-	protein_coding	Siglec1
ENSMUSG00000052769	30.2103	-1.17742	0.176788	-6.66009	2.74e-11	4.53e-09	3	115715149	115716728	+	lncRNA	Gm9889	ENSMUSG00000052769	20.0024	35.5183	56.2661	58.0809	63.0255	32.3296	55.6249	39.6977	33.7206	45.745	26.0351	15.4467	17.619	9.63778	19.4293	12.8349	11.0671	14.741	15.4842	21.8996	3	115715149	115716728	+	lncRNA	Gm9889
ENSMUSG00000024677	131.87	-1.17437	0.162487	-7.22746	4.92e-13	1.68e-10	19	11516511	11531256	+	protein_coding	Ms4a6b	ENSMUSG00000024677	112.514	180.041	119.024	153.421	188.026	234.597	216.081	107.184	338.503	252.13	68.638	73.3718	72.4335	79.8559	61.5262	103.321	76.5476	48.4346	58.6771	93.0735	19	11516511	11531256	+	protein_coding	Ms4a6b
ENSMUSG00000022938	6.812	-1.17148	0.233533	-5.01634	5.27e-07	1.33e-05	16	97470964	97514816	-	protein_coding	Fam3b	ENSMUSG00000022938	10.0012	4.89908	6.49224	21.9173	8.4034	9.11861	11.7668	18.5256	12.9694	12.7661	0	7.17168	1.95766	1.37683	0	1.92523	3.68904	0	3.25984	0	16	97470964	97514816	-	protein_coding	Fam3b
ENSMUSG00000097494	275.875	-1.16933	0.167784	-6.96925	3.19e-12	7.81e-10	12	32919383	32953789	-	lncRNA	4933406C10Rik	ENSMUSG00000097494	231.278	194.738	273.756	520.537	552.524	542.143	473.881	332.138	405.944	456.387	117.158	183.154	211.428	214.785	96.337	82.7849	163.24	149.515	189.071	126.705	12	32919383	32953789	-	lncRNA	4933406C10Rik
ENSMUSG00000026580	9.81058	-1.16925	0.232197	-5.03562	4.76e-07	1.22e-05	1	164115263	164150026	+	protein_coding	Selp	ENSMUSG00000026580	5.0006	52.6651	15.1486	9.8628	8.4034	14.0924	9.62738	10.5861	40.2053	6.38303	4.73366	3.31001	3.91533	1.37683	5.66688	0	0	2.10585	0	3.12852	1	164115263	164150026	+	protein_coding	Selp
ENSMUSG00000118295	48.0372	-1.1692	0.154914	-7.54739	4.44e-14	2e-11	17	31293120	31296689	-	transcribed_processed_pseudogene	Gm8437	ENSMUSG00000118295	73.7589	33.0688	83.3171	72.3272	64.076	65.4882	100.553	79.3954	42.7992	73.4048	21.3015	24.2734	29.3649	24.7829	25.9058	24.3863	32.2791	28.429	39.933	21.8996	17	31293120	31296689	-	transcribed_processed_pseudogene	Gm8437
ENSMUSG00000117255	364.219	-1.16747	0.210686	-5.54126	3e-08	1.35e-06	17	28799493	28801623	-	lncRNA	Gm49864	ENSMUSG00000117255	262.532	169.018	444.719	718.889	987.4	801.608	684.614	378.452	359.254	703.197	145.56	251.561	308.332	246.452	119.005	106.529	182.608	105.293	184.996	124.359	17	28799493	28801623	-	lncRNA	Gm49864
ENSMUSG00000066279	25.4382	-1.16547	0.233035	-5.00128	5.7e-07	1.42e-05	7	102111265	102116828	-	protein_coding	Chrna10	ENSMUSG00000066279	15.0018	6.12385	109.286	28.4925	60.9247	82.0675	65.2523	11.9093	25.9389	32.979	2.36683	23.1701	10.7671	5.5073	0.809555	1.28349	9.22261	6.31755	9.77952	1.56426	7	102111265	102116828	-	protein_coding	Chrna10
ENSMUSG00000024669	25.2541	-1.16528	0.196633	-5.92617	3.1e-09	2.08e-07	19	10717115	10739002	-	protein_coding	Cd5	ENSMUSG00000024669	18.7523	20.8211	27.051	36.1636	53.5717	43.9351	68.4614	37.0512	35.0175	31.9151	21.3015	15.9984	7.83065	19.2756	10.5242	6.41744	11.0671	10.5293	11.4094	17.989	19	10717115	10739002	-	protein_coding	Cd5
ENSMUSG00000024215	106.707	-1.15825	0.181965	-6.36524	1.95e-10	2.31e-08	17	27714351	27728955	-	protein_coding	Spdef	ENSMUSG00000024215	107.513	66.1375	85.4812	213.694	195.379	270.242	170.084	153.498	129.694	161.703	41.4195	61.7868	68.5182	67.4645	27.5249	36.5794	51.6466	82.1282	70.9015	72.7381	17	27714351	27728955	-	protein_coding	Spdef
ENSMUSG00000023045	34.9066	-1.15739	0.222005	-5.21334	1.85e-07	5.78e-06	15	102150525	102163469	+	protein_coding	Soat2	ENSMUSG00000023045	8.75106	67.3623	29.2151	43.8347	52.5213	55.5406	52.4158	38.3745	145.258	46.8089	10.6507	14.3434	16.6401	31.667	8.09555	10.9096	8.30035	11.5822	31.7834	14.0783	15	102150525	102163469	+	protein_coding	Soat2
ENSMUSG00000028862	1045.35	-1.15738	0.209486	-5.52483	3.3e-08	1.46e-06	4	133240817	133252929	+	protein_coding	Map3k6	ENSMUSG00000028862	546.316	935.724	637.322	2061.33	2001.06	2111.37	1437.69	1553.5	2867.55	1593.63	257.984	604.628	816.346	670.514	549.688	605.164	531.222	253.755	295.015	577.212	4	133240817	133252929	+	protein_coding	Map3k6
ENSMUSG00000032496	9.78834	-1.15432	0.233528	-4.94295	7.7e-07	1.8e-05	9	111019270	111042767	+	protein_coding	Ltf	ENSMUSG00000032496	13.7517	48.9908	23.8049	12.0545	8.4034	18.2372	8.55767	2.64651	409.835	21.2768	3.55024	4.41334	0	5.5073	8.09555	1.28349	1.84452	2.10585	1.62992	3.12852	9	111019270	111042767	+	protein_coding	Ltf
ENSMUSG00000027596	5.49819	-1.14988	0.233477	-4.92502	8.44e-07	1.94e-05	2	154791401	155051012	+	protein_coding	a	ENSMUSG00000027596	2.5003	6.12385	14.0665	4.38347	13.6555	14.0924	4.27884	7.93954	14.2664	10.6384	0	1.10334	3.91533	2.75365	0	2.56697	0	2.10585	2.44488	3.12852	2	154791401	155051012	+	protein_coding	a
ENSMUSG00000042087	202.044	-1.14935	0.217889	-5.27495	1.33e-07	4.38e-06	6	117905807	117907760	-	TEC	4933440N22Rik	ENSMUSG00000042087	157.519	113.904	233.721	360.54	464.288	423.601	432.163	264.651	186.76	450.003	84.0224	128.539	191.851	140.436	44.5255	26.3115	106.06	76.8635	83.9409	71.1739	6	117905807	117907760	-	TEC	4933440N22Rik
ENSMUSG00000040340	20.3288	-1.14213	0.229803	-4.97002	6.69e-07	1.61e-05	8	3470861	3487181	+	protein_coding	Tex45	ENSMUSG00000040340	21.2526	8.57339	6.49224	9.8628	76.6811	72.9488	38.5095	37.0512	29.8297	22.3406	10.6507	12.1367	13.7036	6.88413	6.47644	7.05918	5.53356	9.47633	4.0748	7.03917	8	3470861	3487181	+	protein_coding	Tex45
ENSMUSG00000108720	7.77713	-1.14171	0.232407	-4.91253	8.99e-07	2.04e-05	7	128744178	128745276	-	lncRNA	Gm44672	ENSMUSG00000108720	2.5003	2.44954	8.65632	33.9719	34.664	7.46068	19.2548	5.29303	9.07861	11.7022	1.18341	4.41334	0.978832	4.13048	0.809555	1.28349	0	2.10585	3.25984	2.34639	7	128744178	128745276	-	lncRNA	Gm44672
ENSMUSG00000087221	166.183	-1.13933	0.160721	-7.08891	1.35e-12	3.8e-10	15	4020113	4027405	-	lncRNA	BC037032	ENSMUSG00000087221	145.018	95.532	246.705	294.788	299.371	328.27	319.843	191.872	177.681	274.47	79.2888	123.574	130.185	68.8413	71.2408	79.5762	102.371	106.345	101.87	86.8165	15	4020113	4027405	-	lncRNA	BC037032
ENSMUSG00000116482	19.6895	-1.13821	0.233497	-4.87461	1.09e-06	2.4e-05	15	98691862	98696191	-	lncRNA	Gm34152	ENSMUSG00000116482	17.5021	6.12385	10.8204	31.7801	47.2691	66.3171	37.4398	27.7884	38.9083	42.5535	3.55024	8.27502	14.6825	16.5219	0	0	6.45583	7.37048	6.51968	3.91065	15	98691862	98696191	-	lncRNA	Gm34152
ENSMUSG00000032921	76.3767	-1.13799	0.197031	-5.77568	7.66e-09	4.38e-07	11	68921834	68927081	-	protein_coding	Odf4	ENSMUSG00000032921	51.2562	39.1926	77.9069	135.887	173.32	222.991	116.598	129.679	75.2228	102.128	39.0527	60.1318	60.6876	44.0584	34.8109	23.1028	23.9788	41.0641	34.2283	42.235	11	68921834	68927081	-	protein_coding	Odf4
ENSMUSG00000005251	54.2755	-1.13713	0.220436	-5.15856	2.49e-07	7.26e-06	16	97741932	97763787	-	protein_coding	Ripk4	ENSMUSG00000005251	53.7565	28.1697	136.337	59.1768	149.16	80.4095	124.086	37.0512	98.5678	64.8941	8.2839	24.2734	43.0686	41.3048	21.0484	3.85046	40.5795	18.9527	22.8189	29.721	16	97741932	97763787	-	protein_coding	Ripk4
ENSMUSG00000060878	30.0438	-1.1368	0.194571	-5.8426	5.14e-09	3.16e-07	19	11886564	11898079	+	protein_coding	Olfr1420	ENSMUSG00000060878	21.2526	15.922	40.0355	58.0809	50.4204	56.3696	64.1826	44.9907	40.2053	50.0004	15.3844	18.7567	23.492	12.3914	20.2389	8.34267	11.0671	7.37048	22.8189	19.5533	19	11886564	11898079	+	protein_coding	Olfr1420
ENSMUSG00000029082	49.6841	-1.13493	0.221947	-5.11351	3.16e-07	8.78e-06	5	43818884	43843986	+	protein_coding	Bst1	ENSMUSG00000029082	31.2538	86.9586	59.5122	41.6429	53.5717	66.3171	64.1826	43.6675	250.31	69.1495	15.3844	38.6168	27.4073	23.406	42.0968	29.5202	11.9894	7.37048	20.374	10.9498	5	43818884	43843986	+	protein_coding	Bst1
ENSMUSG00000116950	13.2197	-1.13469	0.232971	-4.87053	1.11e-06	2.44e-05	17	15547815	15550462	+	processed_pseudogene	Gm18564	ENSMUSG00000116950	5.0006	7.34862	5.4102	18.6297	39.9162	48.9089	18.1851	11.9093	38.9083	22.3406	2.36683	6.06835	7.83065	5.5073	1.61911	4.49221	2.76678	4.2117	11.4094	1.56426	17	15547815	15550462	+	processed_pseudogene	Gm18564
ENSMUSG00000013584	433.127	-1.12615	0.168422	-6.68647	2.29e-11	3.96e-09	9	71215788	71296243	+	protein_coding	Aldh1a2	ENSMUSG00000013584	562.568	614.834	841.828	494.236	660.718	643.276	551.97	590.173	652.363	589.366	255.618	226.184	182.063	130.798	357.014	441.52	82.0812	315.878	290.941	179.108	9	71215788	71296243	+	protein_coding	Aldh1a2
ENSMUSG00000020583	38.6894	-1.12586	0.210412	-5.35073	8.76e-08	3.13e-06	12	8947928	8972028	+	protein_coding	Matn3	ENSMUSG00000020583	22.5027	26.9449	22.7229	63.5603	79.8323	111.081	66.322	74.1024	32.4236	79.7879	13.0176	29.7901	31.3226	19.2756	19.4293	10.2679	11.0671	17.8997	24.4488	17.989	12	8947928	8972028	+	protein_coding	Matn3
ENSMUSG00000048498	12.303	-1.12473	0.222417	-5.05684	4.26e-07	1.12e-05	11	115051916	115062177	-	protein_coding	Cd300e	ENSMUSG00000048498	13.7517	14.6972	29.2151	35.0677	18.9077	16.5793	16.0456	11.9093	7.78167	25.5321	2.36683	8.82669	13.7036	8.26096	1.61911	6.41744	3.68904	2.10585	4.88976	4.69278	11	115051916	115062177	-	protein_coding	Cd300e
ENSMUSG00000015519	6.23701	-1.12168	0.222676	-5.03728	4.72e-07	1.22e-05	10	28972287	28986303	-	protein_coding	2310057J18Rik	ENSMUSG00000015519	2.5003	1.22477	2.16408	27.3967	13.6555	29.0137	6.41826	3.96977	7.78167	23.4044	0	1.10334	0	0	0	1.28349	0	0	3.25984	1.56426	10	28972287	28986303	-	protein_coding	2310057J18Rik
ENSMUSG00000048534	54.3022	-1.12083	0.22408	-5.00191	5.68e-07	1.41e-05	9	45079182	45108534	+	protein_coding	Jaml	ENSMUSG00000048534	45.0054	29.3945	21.6408	211.502	89.2862	172.425	36.3701	34.4047	141.367	57.4473	16.5678	31.4451	30.3438	19.2756	36.43	19.8941	26.7456	25.2702	13.8543	27.3746	9	45079182	45108534	+	protein_coding	Jaml
ENSMUSG00000040552	301.371	-1.11828	0.16743	-6.67907	2.4e-11	4.14e-09	6	122847137	122856161	-	protein_coding	C3ar1	ENSMUSG00000040552	275.033	451.94	401.437	339.719	422.271	544.629	574.434	269.944	483.76	536.174	164.495	152.26	264.285	256.09	72.8599	143.751	170.618	107.398	266.492	129.834	6	122847137	122856161	-	protein_coding	C3ar1
ENSMUSG00000020229	29.6841	-1.11342	0.217028	-5.13032	2.89e-07	8.23e-06	10	76147450	76189265	+	protein_coding	Slc5a4a	ENSMUSG00000020229	33.7541	19.5963	31.3792	67.9437	35.7145	54.7116	67.3917	55.5768	25.9389	56.3834	9.46732	19.86	25.4496	16.5219	1.61911	3.85046	17.523	20.0056	12.2244	18.7711	10	76147450	76189265	+	protein_coding	Slc5a4a
ENSMUSG00000079419	54.137	-1.11269	0.232342	-4.78901	1.68e-06	3.39e-05	19	11469365	11482192	+	protein_coding	Ms4a6c	ENSMUSG00000079419	18.7523	101.656	48.6918	46.0264	68.2777	83.7254	90.9253	30.4349	316.455	68.0856	8.2839	13.7917	22.5131	37.1743	23.4771	40.4298	11.9894	24.2173	11.4094	16.4247	19	11469365	11482192	+	protein_coding	Ms4a6c
ENSMUSG00000027261	35.9352	-1.11197	0.224208	-4.95955	7.07e-07	1.68e-05	2	134497360	134554368	-	protein_coding	Hao1	ENSMUSG00000027261	31.2538	9.79816	27.051	56.9851	66.1768	109.423	77.0191	41.021	59.6595	75.5325	10.6507	25.9284	30.3438	15.1451	11.3338	3.85046	12.9117	12.6351	32.5984	9.38556	2	134497360	134554368	-	protein_coding	Hao1
ENSMUSG00000030787	96.5769	-1.11154	0.117761	-9.43892	3.77e-21	1.28e-17	7	110850606	110863239	-	protein_coding	Lyve1	ENSMUSG00000030787	112.514	94.3072	129.845	124.929	132.354	144.24	170.084	124.386	159.524	153.193	49.7034	49.6501	48.9416	46.8121	63.1453	60.3239	70.0918	56.858	54.6023	86.0343	7	110850606	110863239	-	protein_coding	Lyve1
ENSMUSG00000108373	13.5146	-1.10979	0.233262	-4.7577	1.96e-06	3.83e-05	7	79577754	79579079	-	lncRNA	Gm45168	ENSMUSG00000108373	10.0012	7.34862	32.4612	35.0677	23.1094	24.8689	43.8581	7.93954	15.5633	27.6598	11.8341	5.51668	3.91533	2.75365	0	0	7.37809	0	1.62992	9.38556	7	79577754	79579079	-	lncRNA	Gm45168
ENSMUSG00000048153	9.53952	-1.10939	0.231865	-4.78463	1.71e-06	3.45e-05	14	54278252	54284939	-	protein_coding	Olfr49	ENSMUSG00000048153	7.50091	9.79816	6.49224	12.0545	25.2102	25.6979	13.9062	5.29303	15.5633	30.8513	7.10049	1.10334	1.95766	2.75365	1.61911	2.56697	9.22261	4.2117	1.62992	6.25704	14	54278252	54284939	-	protein_coding	Olfr49
ENSMUSG00000116690	17.617	-1.10646	0.219733	-5.03548	4.77e-07	1.22e-05	16	31412466	31416491	+	lncRNA	Gm49736	ENSMUSG00000116690	8.75106	11.0229	12.9845	21.9173	58.8238	41.4482	29.9519	30.4349	25.9389	26.596	11.8341	8.82669	14.6825	2.75365	8.09555	5.77569	10.1449	3.15878	10.5945	8.60343	16	31412466	31416491	+	lncRNA	Gm49736
ENSMUSG00000106188	14.3295	-1.10632	0.21802	-5.07438	3.89e-07	1.04e-05	5	145265878	145266377	-	processed_pseudogene	Gm9710	ENSMUSG00000106188	11.2514	11.0229	8.65632	14.2463	21.0085	33.9875	29.9519	39.6977	23.345	22.3406	7.10049	5.51668	6.85182	13.7683	4.85733	3.20872	2.76678	9.47633	8.1496	9.38556	5	145265878	145266377	-	processed_pseudogene	Gm9710
ENSMUSG00000021176	20.963	-1.10523	0.203408	-5.43358	5.52e-08	2.17e-06	12	99693044	99884439	-	protein_coding	Efcab11	ENSMUSG00000021176	35.0042	24.4954	21.6408	17.5339	40.9666	35.6455	52.4158	10.5861	42.7992	28.7236	9.46732	15.4467	6.85182	11.0146	8.09555	17.9688	12.9117	12.6351	4.88976	10.1677	12	99693044	99884439	-	protein_coding	Efcab11
ENSMUSG00000030972	42.0274	-1.10501	0.202683	-5.45193	4.98e-08	1.98e-06	7	119519462	119545551	+	protein_coding	Acsm5	ENSMUSG00000030972	55.0066	61.2385	61.6763	85.4776	14.706	58.0275	89.8556	60.8698	62.2534	72.341	14.201	35.8584	19.5766	1.37683	21.0484	24.3863	33.2014	23.1644	22.8189	23.4639	7	119519462	119545551	+	protein_coding	Acsm5
ENSMUSG00000108353	69.6646	-1.10384	0.230331	-4.7924	1.65e-06	3.35e-05	7	127993268	127996598	+	TEC	Gm45205	ENSMUSG00000108353	37.5045	23.2706	25.969	107.395	246.85	213.873	108.041	113.8	97.2709	127.661	13.0176	35.3067	64.6029	27.5365	36.43	25.028	18.4452	25.2702	16.2992	29.721	7	127993268	127996598	+	TEC	Gm45205
ENSMUSG00000085307	49.5199	-1.10343	0.210587	-5.23975	1.61e-07	5.15e-06	11	96918940	96922493	-	lncRNA	Gm11525	ENSMUSG00000085307	33.7541	39.1926	41.1175	72.3272	85.0845	148.385	98.4133	48.9605	62.2534	107.448	7.10049	31.4451	57.7511	34.4206	17.0006	19.2523	22.1343	15.7939	21.189	27.3746	11	96918940	96922493	-	lncRNA	Gm11525
ENSMUSG00000070419	18.8327	-1.10325	0.230831	-4.77948	1.76e-06	3.51e-05	5	145345278	145390926	+	protein_coding	Cyp3a57	ENSMUSG00000070419	11.2514	0	16.2306	23.0132	78.7819	53.8827	84.507	11.9093	18.1572	30.8513	2.36683	4.96501	13.7036	8.26096	2.42866	1.92523	1.84452	6.31755	0	6.25704	5	145345278	145390926	+	protein_coding	Cyp3a57
ENSMUSG00000086321	30.4524	-1.10246	0.194962	-5.65475	1.56e-08	7.87e-07	4	83378316	83390668	-	lncRNA	Gm11413	ENSMUSG00000086321	40.0048	20.8211	27.051	79.9983	35.7145	58.0275	59.9037	42.3442	24.642	53.1919	17.7512	21.515	15.6613	26.1597	12.1433	11.5514	17.523	24.2173	12.2244	8.60343	4	83378316	83390668	-	lncRNA	Gm11413
ENSMUSG00000087032	5.60538	-1.10026	0.22729	-4.84076	1.29e-06	2.75e-05	2	103177786	103186681	+	lncRNA	Gm13874	ENSMUSG00000087032	0	3.67431	6.49224	5.47933	21.0085	16.5793	21.3942	5.29303	7.78167	13.8299	0	2.20667	0	2.75365	0	0.641744	1.84452	0	0	3.12852	2	103177786	103186681	+	lncRNA	Gm13874
ENSMUSG00000033688	61.6179	-1.09975	0.202987	-5.41782	6.03e-08	2.31e-06	9	103250520	103305082	-	protein_coding	1300017J02Rik	ENSMUSG00000033688	37.5045	39.1926	60.5943	117.258	133.404	122.687	114.459	67.4861	88.1923	124.469	20.118	49.0984	67.5394	46.8121	20.2389	17.9688	25.8233	26.3231	19.559	33.6316	9	103250520	103305082	-	protein_coding	1300017J02Rik
ENSMUSG00000056600	16.2943	-1.09919	0.220336	-4.98869	6.08e-07	1.49e-05	17	37083870	37088499	-	protein_coding	Olfr90	ENSMUSG00000056600	12.5015	13.4725	15.1486	28.4925	26.2606	55.5406	32.0913	31.7582	6.48472	25.5321	4.73366	7.72335	5.87299	9.63778	14.572	7.05918	3.68904	9.47633	4.88976	10.9498	17	37083870	37088499	-	protein_coding	Olfr90
ENSMUSG00000045467	108.719	-1.09793	0.121416	-9.04267	1.53e-19	3.6e-16	7	80246375	80260821	+	protein_coding	Ttll13	ENSMUSG00000045467	135.016	90.6329	133.091	176.435	189.077	180.714	192.548	134.972	140.07	139.363	60.3541	79.9918	54.8146	50.9426	77.7173	60.9656	80.2367	61.0697	65.1968	71.1739	7	80246375	80260821	+	protein_coding	Ttll13
ENSMUSG00000048373	210.373	-1.09771	0.170125	-6.45233	1.1e-10	1.49e-08	5	43978857	43981779	-	protein_coding	Fgfbp1	ENSMUSG00000048373	211.276	171.468	331.104	306.843	273.111	421.114	297.379	304.349	376.114	304.258	111.241	164.949	56.7722	68.8413	144.101	191.24	71.0141	172.68	146.693	82.9058	5	43978857	43981779	-	protein_coding	Fgfbp1
ENSMUSG00000026592	29.5761	-1.09658	0.215887	-5.07941	3.79e-07	1.01e-05	1	157099138	157108680	-	protein_coding	Tex35	ENSMUSG00000026592	17.5021	14.6972	19.4767	23.0132	53.5717	89.5281	47.0672	51.607	84.3014	43.6174	14.201	9.93002	13.7036	8.26096	12.1433	12.1931	15.6784	18.9527	15.4842	26.5924	1	157099138	157108680	-	protein_coding	Tex35
ENSMUSG00000041219	781.033	-1.09554	0.185043	-5.92046	3.21e-09	2.14e-07	2	113831491	113848661	-	protein_coding	Arhgap11a	ENSMUSG00000041219	655.079	567.068	1131.81	999.431	1289.92	1119.1	2058.12	885.259	621.237	1917.04	454.431	524.084	498.225	461.237	341.632	367.077	560.735	321.142	528.909	319.109	2	113831491	113848661	-	protein_coding	Arhgap11a
ENSMUSG00000034115	66.353	-1.09394	0.210623	-5.19385	2.06e-07	6.29e-06	9	119753758	119825456	-	protein_coding	Scn11a	ENSMUSG00000034115	68.7583	40.4174	77.9069	106.299	126.051	137.608	102.692	104.537	80.4106	140.427	35.5024	44.6851	46.9839	44.0584	5.66688	7.70092	42.424	25.2702	31.7834	57.8776	9	119753758	119825456	-	protein_coding	Scn11a
ENSMUSG00000108170	8.6269	-1.09141	0.225679	-4.83609	1.32e-06	2.79e-05	6	52713343	52713955	-	TEC	Gm43966	ENSMUSG00000108170	3.75045	9.79816	18.3947	21.9173	13.6555	14.9214	16.0456	9.2628	9.07861	15.9576	2.36683	4.96501	3.91533	4.13048	1.61911	0.641744	5.53356	6.31755	2.44488	7.8213	6	52713343	52713955	-	TEC	Gm43966
ENSMUSG00000086459	13.0986	-1.08977	0.222961	-4.88773	1.02e-06	2.27e-05	11	23497752	23499661	+	lncRNA	1700030C12Rik	ENSMUSG00000086459	15.0018	6.12385	10.8204	23.0132	28.3615	24.04	21.3942	19.8489	24.642	26.596	3.55024	3.86168	13.7036	4.13048	0	4.49221	9.22261	6.31755	10.5945	6.25704	11	23497752	23499661	+	lncRNA	1700030C12Rik
ENSMUSG00000028435	16.3048	-1.08832	0.232794	-4.67502	2.94e-06	5.38e-05	4	41092721	41098183	-	protein_coding	Aqp3	ENSMUSG00000028435	12.5015	17.1468	8.65632	40.5471	32.5632	45.593	35.3004	15.8791	32.4236	21.2768	11.8341	5.51668	1.95766	13.7683	0	3.85046	11.0671	5.26463	0	10.9498	4	41092721	41098183	-	protein_coding	Aqp3
ENSMUSG00000097819	13.4127	-1.08767	0.233163	-4.66485	3.09e-06	5.57e-05	1	59488479	59492605	-	lncRNA	Gm26813	ENSMUSG00000097819	6.25075	2.44954	10.8204	24.1091	42.017	40.6192	22.4639	27.7884	32.4236	8.5107	0	4.41334	9.78832	11.0146	1.61911	6.41744	3.68904	4.2117	6.51968	3.12852	1	59488479	59492605	-	lncRNA	Gm26813
ENSMUSG00000116946	421.247	-1.08727	0.196872	-5.52271	3.34e-08	1.47e-06	16	31233589	31248313	+	lncRNA	Gm41442	ENSMUSG00000116946	345.042	197.188	603.779	627.932	803.575	994.757	959.529	415.503	507.105	673.409	163.311	418.164	262.327	262.974	146.529	166.212	240.71	170.574	217.594	248.717	16	31233589	31248313	+	lncRNA	Gm41442
ENSMUSG00000085182	7.41835	-1.08716	0.231984	-4.68635	2.78e-06	5.13e-05	2	68476081	68477752	+	lncRNA	Gm13596	ENSMUSG00000085182	7.50091	3.67431	8.65632	24.1091	13.6555	20.7241	10.6971	10.5861	3.89083	15.9576	1.18341	6.62001	0.978832	2.75365	4.04777	5.13395	1.84452	3.15878	1.62992	1.56426	2	68476081	68477752	+	lncRNA	Gm13596
ENSMUSG00000105052	22.8316	-1.08507	0.23232	-4.67058	3e-06	5.46e-05	5	25919631	25926290	-	lncRNA	Gm21655	ENSMUSG00000105052	20.0024	4.89908	15.1486	51.5057	49.37	48.0799	56.6946	56.9001	23.345	39.362	11.8341	19.3084	11.746	12.3914	0	2.56697	14.7562	8.4234	3.25984	7.03917	5	25919631	25926290	-	lncRNA	Gm21655
ENSMUSG00000029491	37.5209	-1.08368	0.218557	-4.95836	7.11e-07	1.68e-05	5	108388390	108432397	+	protein_coding	Pde6b	ENSMUSG00000029491	37.5045	26.9449	23.8049	50.4099	76.6811	101.134	111.25	43.6675	53.1747	40.4258	16.5678	29.2384	39.1533	13.7683	6.47644	5.77569	23.9788	14.741	13.0394	22.6818	5	108388390	108432397	+	protein_coding	Pde6b
ENSMUSG00000111308	7.2369	-1.07947	0.233025	-4.63241	3.61e-06	6.29e-05	9	41228881	41232191	+	TEC	Gm48710	ENSMUSG00000111308	7.50091	15.922	2.16408	4.38347	26.2606	8.28964	14.9759	13.2326	11.6725	12.7661	0	2.20667	5.87299	5.5073	1.61911	2.56697	1.84452	0	3.25984	4.69278	9	41228881	41232191	+	TEC	Gm48710
ENSMUSG00000073739	83.4491	-1.07693	0.184495	-5.8372	5.31e-09	3.25e-07	4	139175404	139180655	-	lncRNA	Gm16287	ENSMUSG00000073739	62.5075	44.0917	74.6608	127.121	181.724	106.107	207.524	117.77	90.7861	184.044	42.6029	64.5451	47.9627	42.6816	39.6682	42.9968	45.1908	31.5878	49.7125	65.6989	4	139175404	139180655	-	lncRNA	Gm16287
ENSMUSG00000034990	97.265	-1.07558	0.231108	-4.65402	3.26e-06	5.79e-05	7	121081649	121163097	+	protein_coding	Otoa	ENSMUSG00000034990	61.2574	166.569	115.778	136.983	202.732	173.254	171.153	121.74	207.511	177.661	10.6507	49.0984	138.015	70.2181	17.8102	23.7445	39.6572	6.31755	29.3386	25.8103	7	121081649	121163097	+	protein_coding	Otoa
ENSMUSG00000111792	52.7763	-1.07453	0.206848	-5.19478	2.05e-07	6.27e-06	9	120068995	120070622	+	lncRNA	Gm33858	ENSMUSG00000111792	48.7559	25.7202	84.3992	112.874	150.211	65.4882	70.6008	97.921	40.2053	79.7879	30.7688	19.86	46.0051	16.5219	51.8115	23.7445	11.0671	16.8468	28.5236	34.4137	9	120068995	120070622	+	lncRNA	Gm33858
ENSMUSG00000097016	20.9917	-1.07435	0.204401	-5.2561	1.47e-07	4.79e-06	7	84152139	84195115	+	lncRNA	Gm26708	ENSMUSG00000097016	32.5039	9.79816	21.6408	21.9173	33.6136	35.6455	36.3701	18.5256	51.8778	45.745	9.46732	7.17168	5.87299	12.3914	16.1911	10.9096	12.9117	6.31755	11.4094	19.5533	7	84152139	84195115	+	lncRNA	Gm26708
ENSMUSG00000104978	17.23	-1.0732	0.213006	-5.03835	4.7e-07	1.21e-05	5	142622602	142622831	-	processed_pseudogene	Gm31274	ENSMUSG00000104978	11.2514	4.89908	16.2306	29.5884	37.8153	29.8427	24.6033	37.0512	20.7511	43.6174	10.6507	11.0334	11.746	5.5073	10.5242	5.77569	8.30035	12.6351	6.51968	6.25704	5	142622602	142622831	-	processed_pseudogene	Gm31274
ENSMUSG00000021390	268.172	-1.07275	0.161048	-6.66107	2.72e-11	4.53e-09	13	49608045	49624501	+	protein_coding	Ogn	ENSMUSG00000021390	361.294	338.036	484.754	339.719	302.523	302.572	444.999	411.533	386.49	404.258	121.892	166.052	92.989	99.1315	239.628	257.339	63.636	165.309	203.74	177.544	13	49608045	49624501	+	protein_coding	Ogn
ENSMUSG00000046589	13.5983	-1.07065	0.233518	-4.58487	4.54e-06	7.62e-05	8	4226826	4237470	+	protein_coding	Lrrc8e	ENSMUSG00000046589	6.25075	3.67431	19.4767	23.0132	30.4623	48.9089	26.7427	3.96977	19.4542	42.5535	0	4.41334	13.7036	5.5073	3.23822	3.85046	5.53356	0	6.51968	4.69278	8	4226826	4237470	+	protein_coding	Lrrc8e
ENSMUSG00000025644	80.3991	-1.06787	0.199146	-5.36224	8.22e-08	2.97e-06	9	109093843	109097796	-	lncRNA	Gm7628	ENSMUSG00000025644	73.7589	45.3165	87.6453	121.641	232.144	167.451	157.247	59.5466	106.349	114.895	50.8868	51.3051	78.3065	46.8121	25.9058	23.7445	39.6572	22.1114	58.6771	44.5814	9	109093843	109097796	-	lncRNA	Gm7628
ENSMUSG00000086266	14.1558	-1.06683	0.204809	-5.20888	1.9e-07	5.9e-06	7	142659692	142670356	+	lncRNA	Igf2os	ENSMUSG00000086266	18.7523	25.7202	36.7894	16.438	16.8068	17.4082	18.1851	19.8489	15.5633	23.4044	7.10049	8.27502	1.95766	5.5073	10.5242	14.7601	2.76678	7.37048	7.33464	8.60343	7	142659692	142670356	+	lncRNA	Igf2os
ENSMUSG00000058470	16.442	-1.06434	0.212699	-5.00399	5.62e-07	1.4e-05	19	11485937	11512577	+	protein_coding	Gm8369	ENSMUSG00000058470	16.252	9.79816	21.6408	28.4925	38.8657	33.9875	27.8124	11.9093	25.9389	28.7236	7.10049	14.895	11.746	11.0146	1.61911	7.70092	3.68904	8.4234	11.4094	7.8213	19	11485937	11512577	+	protein_coding	Gm8369
ENSMUSG00000103047	200.13	-1.06372	0.158296	-6.71985	1.82e-11	3.31e-09	15	8652105	8655073	-	TEC	Gm37310	ENSMUSG00000103047	122.515	157.995	260.772	333.144	360.296	219.675	258.87	336.107	437.07	318.088	95.8566	100.955	137.036	133.552	137.624	111.022	79.3144	98.975	142.618	161.119	15	8652105	8655073	-	TEC	Gm37310
ENSMUSG00000026068	26.03	-1.06369	0.227913	-4.6671	3.05e-06	5.52e-05	1	40515361	40551705	+	protein_coding	Il18rap	ENSMUSG00000026068	15.0018	44.0917	21.6408	18.6297	46.2187	54.7116	32.0913	2.64651	191.948	35.1067	2.36683	11.0334	11.746	2.75365	0	1.92523	9.22261	4.2117	9.77952	5.47491	1	40515361	40551705	+	protein_coding	Il18rap
ENSMUSG00000027875	1179.06	-1.06334	0.122487	-8.68122	3.92e-18	5.45e-15	3	98280434	98310738	+	protein_coding	Hmgcs2	ENSMUSG00000027875	985.119	1655.89	1495.38	1350.11	1831.94	1889.21	1943.66	1374.86	2339.69	1387.24	695.848	1063.06	666.584	649.862	578.832	569.868	744.264	858.134	815.775	685.928	3	98280434	98310738	+	protein_coding	Hmgcs2
ENSMUSG00000001444	27.961	-1.06297	0.232729	-4.5674	4.94e-06	8.13e-05	11	97098070	97115331	-	protein_coding	Tbx21	ENSMUSG00000001444	10.0012	7.34862	194.767	36.1636	18.9077	43.9351	54.5552	15.8791	27.2358	38.2982	20.118	15.4467	9.78832	11.0146	8.09555	9.62615	9.22261	7.37048	8.1496	13.2962	11	97098070	97115331	-	protein_coding	Tbx21
ENSMUSG00000038300	48.7443	-1.06171	0.173833	-6.10767	1.01e-09	8.54e-08	7	45180994	45181838	+	protein_coding	Pth2	ENSMUSG00000038300	48.7559	50.2155	71.4147	89.8611	60.9247	69.633	94.1344	70.1326	66.1442	65.958	27.2185	21.515	35.2379	39.928	21.858	8.34267	23.0565	27.3761	45.6377	37.5423	7	45180994	45181838	+	protein_coding	Pth2
ENSMUSG00000030108	671.307	-1.0614	0.136259	-7.78959	6.72e-15	3.74e-12	6	121300226	121337733	+	protein_coding	Slc6a13	ENSMUSG00000030108	816.349	873.261	1119.91	933.679	865.551	908.545	1018.36	893.199	1024.59	848.943	305.321	322.726	388.596	301.525	515.686	702.709	201.053	458.022	478.381	449.725	6	121300226	121337733	+	protein_coding	Slc6a13
ENSMUSG00000068105	58.2523	-1.06102	0.149126	-7.11492	1.12e-12	3.26e-10	15	82221742	82224369	-	protein_coding	Tnfrsf13c	ENSMUSG00000068105	68.7583	55.1146	66.0045	79.9983	108.194	87.8702	84.507	68.8094	88.1923	100.001	30.7688	36.4101	36.2168	68.8413	25.9058	28.8785	45.1908	23.1644	30.1535	32.0673	15	82221742	82224369	-	protein_coding	Tnfrsf13c
ENSMUSG00000044276	14.3978	-1.061	0.201671	-5.26105	1.43e-07	4.68e-06	15	74709160	74710374	+	lncRNA	4933427E11Rik	ENSMUSG00000044276	17.5021	22.0458	12.9845	30.6843	32.5632	20.7241	17.1153	17.2023	18.1572	21.2768	0	9.93002	9.78832	8.26096	10.5242	4.49221	8.30035	7.37048	6.51968	12.5141	15	74709160	74710374	+	lncRNA	4933427E11Rik
ENSMUSG00000039981	12.9695	-1.06045	0.225133	-4.71033	2.47e-06	4.65e-05	10	7832469	7870396	+	protein_coding	Zc3h12d	ENSMUSG00000039981	2.5003	17.1468	12.9845	19.7256	27.3111	19.8951	19.2548	23.8186	33.7206	21.2768	2.36683	11.585	3.91533	16.5219	2.42866	5.13395	5.53356	6.31755	3.25984	4.69278	10	7832469	7870396	+	protein_coding	Zc3h12d
ENSMUSG00000097817	11.3463	-1.05241	0.219643	-4.79144	1.66e-06	3.36e-05	7	30193953	30200889	+	lncRNA	Gm26810	ENSMUSG00000097817	8.75106	6.12385	25.969	17.5339	29.4119	17.4082	26.7427	15.8791	7.78167	13.8299	4.73366	5.51668	10.7671	5.5073	4.85733	3.85046	1.84452	8.4234	6.51968	5.47491	7	30193953	30200889	+	lncRNA	Gm26810
ENSMUSG00000049130	136.735	-1.05202	0.213821	-4.92009	8.65e-07	1.98e-05	7	16246742	16259540	-	protein_coding	C5ar1	ENSMUSG00000049130	82.51	282.922	110.368	94.2445	227.942	173.254	222.5	129.679	465.603	232.981	54.4371	73.9235	158.571	79.8559	51.8115	57.7569	70.0918	50.5404	76.6062	39.1065	7	16246742	16259540	-	protein_coding	C5ar1
ENSMUSG00000116949	21.219	-1.05042	0.233224	-4.5039	6.67e-06	0.000104056	17	15535064	15536704	-	processed_pseudogene	Gm7177	ENSMUSG00000116949	25.003	7.34862	12.9845	38.3553	47.2691	46.422	56.6946	11.9093	32.4236	62.7664	4.73366	13.24	11.746	15.1451	0	5.13395	14.7562	0	11.4094	7.03917	17	15535064	15536704	-	processed_pseudogene	Gm7177
ENSMUSG00000022598	20.8851	-1.05014	0.224681	-4.67394	2.95e-06	5.4e-05	15	74714838	74717069	+	protein_coding	Psca	ENSMUSG00000022598	12.5015	8.57339	28.1331	42.7388	54.6221	43.1061	36.3701	19.8489	32.4236	38.2982	9.46732	11.0334	24.4708	12.3914	3.23822	6.41744	17.523	2.10585	8.96456	5.47491	15	74714838	74717069	+	protein_coding	Psca
ENSMUSG00000065296	3.30828	-1.04989	0.227734	-4.61015	4.02e-06	6.9e-05	10	94184491	94184573	-	snRNA	Gm26122	ENSMUSG00000065296	6.25075	3.67431	4.32816	4.38347	7.35298	2.48689	7.48797	0	16.8603	6.38303	0	0.551668	0.978832	1.37683	0	0.641744	1.84452	0	0	1.56426	10	94184491	94184573	-	snRNA	Gm26122
ENSMUSG00000040283	19.1832	-1.04958	0.214955	-4.88278	1.05e-06	2.32e-05	11	49165584	49187159	-	protein_coding	Btnl9	ENSMUSG00000040283	13.7517	22.0458	19.4767	40.5471	34.664	19.0662	32.0913	11.9093	38.9083	53.1919	9.46732	20.4117	8.80948	5.5073	6.47644	12.8349	11.0671	10.5293	9.77952	3.12852	11	49165584	49187159	-	protein_coding	Btnl9
ENSMUSG00000075463	73.2425	-1.0493	0.124236	-8.44604	3.01e-17	3.3e-14	14	122913029	122937469	+	lncRNA	4930594M22Rik	ENSMUSG00000075463	80.0097	100.431	82.2351	89.8611	119.749	130.976	123.017	91.3047	90.7861	101.065	36.6858	52.9601	46.9839	30.2902	53.4306	53.2647	31.3569	57.9109	44.8228	47.7099	14	122913029	122937469	+	lncRNA	4930594M22Rik
ENSMUSG00000007080	181.244	-1.04865	0.140611	-7.45777	8.8e-14	3.5e-11	5	110286305	110337474	+	protein_coding	Pole	ENSMUSG00000007080	160.019	161.67	234.803	207.119	315.128	367.231	343.377	228.924	199.73	289.364	101.774	103.714	119.417	111.523	144.101	139.9	85.7703	86.3399	90.4605	134.526	5	110286305	110337474	+	protein_coding	Pole
ENSMUSG00000112664	6.078	-1.04665	0.233135	-4.48947	7.14e-06	0.000110074	12	8453503	8454918	-	TEC	Gm48076	ENSMUSG00000112664	2.5003	4.89908	3.24612	10.9587	16.8068	6.63171	22.4639	6.61629	18.1572	8.5107	1.18341	1.655	1.95766	6.88413	0	1.28349	4.6113	0	1.62992	1.56426	12	8453503	8454918	-	TEC	Gm48076
ENSMUSG00000111366	2.95259	-1.04628	0.224654	-4.65732	3.2e-06	5.73e-05	10	93618861	93634323	+	lncRNA	Gm47156	ENSMUSG00000111366	3.75045	8.57339	0	5.47933	9.45383	8.28964	7.48797	2.64651	6.48472	2.12768	0	0	0	0	0	0.641744	0.922261	0	1.62992	1.56426	10	93618861	93634323	+	lncRNA	Gm47156
ENSMUSG00000026114	22.2762	-1.04544	0.218194	-4.7913	1.66e-06	3.36e-05	1	37214433	37263384	+	protein_coding	Cnga3	ENSMUSG00000026114	16.252	22.0458	35.7073	39.4512	21.0085	42.2772	43.8581	26.4651	33.7206	53.1919	7.10049	24.8251	11.746	8.26096	11.3338	20.5358	11.0671	2.10585	12.2244	2.34639	1	37214433	37263384	+	protein_coding	Cnga3
ENSMUSG00000112630	33.1263	-1.04497	0.18326	-5.70212	1.18e-08	6.21e-07	10	25615631	25621563	-	lncRNA	Gm36908	ENSMUSG00000112630	35.0042	28.1697	89.8094	60.2727	53.5717	43.1061	38.5095	39.6977	37.6114	44.6812	23.6683	17.1017	32.3014	11.0146	20.2389	15.4018	11.9894	11.5822	26.8937	21.8996	10	25615631	25621563	-	lncRNA	Gm36908
ENSMUSG00000111489	14.3845	-1.04438	0.217727	-4.79673	1.61e-06	3.28e-05	9	14089619	14118301	+	lncRNA	1700019J19Rik	ENSMUSG00000111489	5.0006	11.0229	17.3126	30.6843	21.0085	24.8689	31.0216	13.2326	33.7206	25.5321	10.6507	7.17168	7.83065	11.0146	6.47644	5.77569	10.1449	0	8.96456	6.25704	9	14089619	14118301	+	lncRNA	1700019J19Rik
ENSMUSG00000090891	31.0648	-1.04101	0.187815	-5.54274	2.98e-08	1.35e-06	6	87104745	87112997	+	protein_coding	D6Ertd527e	ENSMUSG00000090891	25.003	30.6192	37.8714	60.2727	38.8657	35.6455	52.4158	59.5466	32.4236	68.0856	18.9346	12.6884	12.7248	19.2756	9.71466	9.62615	20.2897	32.6407	21.189	23.4639	6	87104745	87112997	+	protein_coding	D6Ertd527e
ENSMUSG00000116733	55.6879	-1.04071	0.154541	-6.73418	1.65e-11	3.03e-09	16	23127792	23128922	+	lncRNA	6330408M09Rik	ENSMUSG00000116733	50.006	60.0137	90.8914	92.0528	73.5298	98.6467	109.11	68.8094	53.1747	77.6602	47.3366	39.7201	36.2168	15.1451	38.0491	21.1775	31.3569	38.9582	37.4882	34.4137	16	23127792	23128922	+	lncRNA	6330408M09Rik
ENSMUSG00000103785	79.6456	-1.03831	0.16947	-6.12678	8.97e-10	7.87e-08	9	108823937	108825098	-	lncRNA	Gm35025	ENSMUSG00000103785	67.5081	62.4632	86.5632	127.121	178.572	123.516	130.505	92.628	99.8648	146.81	26.0351	54.0635	63.624	59.2035	35.6204	51.3395	51.6466	70.546	28.5236	36.7601	9	108823937	108825098	-	lncRNA	Gm35025
ENSMUSG00000047798	376.381	-1.03663	0.230669	-4.49402	6.99e-06	0.000108069	11	115116213	115133992	-	protein_coding	Cd300lf	ENSMUSG00000047798	371.295	494.807	255.362	555.604	786.769	788.345	504.903	120.416	1491.49	489.366	24.8517	144.537	349.443	247.829	154.625	157.227	132.806	141.092	79.8661	236.985	11	115116213	115133992	-	protein_coding	Cd300lf
ENSMUSG00000045102	67.574	-1.0347	0.186776	-5.53976	3.03e-08	1.36e-06	5	34007178	34169448	-	protein_coding	Poln	ENSMUSG00000045102	50.006	50.2155	68.1686	123.833	112.396	143.411	126.226	59.5466	62.2534	164.895	27.2185	61.2351	51.8781	33.0438	40.4777	47.489	35.0459	25.2702	39.933	28.9388	5	34007178	34169448	-	protein_coding	Poln
ENSMUSG00000097786	10.1636	-1.0327	0.224238	-4.60539	4.12e-06	7.02e-05	3	30792569	30793564	-	lncRNA	4933429H19Rik	ENSMUSG00000097786	8.75106	4.89908	19.4767	19.7256	30.4623	18.2372	8.55767	7.93954	12.9694	21.2768	5.91707	2.75834	7.83065	6.88413	4.04777	2.56697	1.84452	6.31755	7.33464	5.47491	3	30792569	30793564	-	lncRNA	4933429H19Rik
ENSMUSG00000023224	444.412	-1.03189	0.14935	-6.90916	4.88e-12	1.11e-09	2	84765386	84775444	-	protein_coding	Serping1	ENSMUSG00000023224	436.303	458.064	652.47	503.003	788.87	668.145	568.016	465.787	1088.14	520.217	253.251	237.217	375.871	329.061	282.535	308.679	135.572	206.373	325.984	284.695	2	84765386	84775444	-	protein_coding	Serping1
ENSMUSG00000026581	6.19739	-1.03152	0.227484	-4.53449	5.77e-06	9.23e-05	1	164061981	164084181	+	protein_coding	Sell	ENSMUSG00000026581	12.5015	9.79816	1.08204	14.2463	2.10085	4.97378	6.41826	5.29303	38.9083	14.8937	2.36683	2.20667	0	1.37683	3.23822	1.28349	0	0	3.25984	0	1	164061981	164084181	+	protein_coding	Sell
ENSMUSG00000099512	2.61745	-1.03102	0.222921	-4.62505	3.75e-06	6.48e-05	9	90825301	90828860	-	lncRNA	Gm28703	ENSMUSG00000099512	2.5003	1.22477	8.65632	4.38347	8.4034	2.48689	8.55767	5.29303	3.89083	3.19151	0	1.655	0	0	0	0	0	2.10585	0	0	9	90825301	90828860	-	lncRNA	Gm28703
ENSMUSG00000108290	5.81875	-1.03064	0.232935	-4.42459	9.66e-06	0.000139812	6	129522561	129525584	+	TEC	Gm44120	ENSMUSG00000108290	3.75045	4.89908	0	10.9587	16.8068	18.2372	11.7668	2.64651	18.1572	9.57454	2.36683	1.10334	1.95766	2.75365	1.61911	2.56697	1.84452	2.10585	3.25984	0	6	129522561	129525584	+	TEC	Gm44120
ENSMUSG00000038357	12.0539	-1.02819	0.230965	-4.45173	8.52e-06	0.000126794	9	109847378	109849617	-	protein_coding	Camp	ENSMUSG00000038357	12.5015	19.5963	16.2306	10.9587	2.10085	14.0924	8.55767	5.29303	88.1923	28.7236	9.46732	5.51668	3.91533	4.13048	0	3.85046	0	3.15878	2.44488	2.34639	9	109847378	109849617	-	protein_coding	Camp
ENSMUSG00000118056	11.3629	-1.02722	0.220093	-4.66722	3.05e-06	5.52e-05	18	38023528	38061296	+	lncRNA	Gm30093	ENSMUSG00000118056	8.75106	4.89908	16.2306	10.9587	24.1598	30.6717	22.4639	26.4651	15.5633	9.57454	3.55024	7.72335	7.83065	5.5073	3.23822	7.05918	2.76678	6.31755	5.70472	7.8213	18	38023528	38061296	+	lncRNA	Gm30093
ENSMUSG00000074971	342.388	-1.02642	0.135464	-7.5771	3.53e-14	1.67e-11	2	110360916	110363183	-	protein_coding	Fibin	ENSMUSG00000074971	260.031	376.004	445.801	456.976	550.423	678.922	483.509	455.2	488.948	502.132	163.311	249.906	235.898	326.308	155.435	170.704	186.297	221.114	167.882	272.963	2	110360916	110363183	-	protein_coding	Fibin
ENSMUSG00000034127	26.9628	-1.02529	0.207269	-4.94668	7.55e-07	1.77e-05	10	115816831	115849893	+	protein_coding	Tspan8	ENSMUSG00000034127	27.5033	36.7431	47.6098	26.3008	44.1179	40.6192	39.5792	44.9907	37.6114	47.8727	26.0351	8.82669	9.78832	2.75365	25.9058	29.5202	3.68904	9.47633	14.6693	15.6426	10	115816831	115849893	+	protein_coding	Tspan8
ENSMUSG00000006542	13.4618	-1.02491	0.223846	-4.57863	4.68e-06	7.79e-05	1	74738921	74749221	-	protein_coding	Prkag3	ENSMUSG00000006542	6.25075	6.12385	24.8869	15.3421	10.5043	23.211	28.8822	22.4954	36.3145	29.7875	2.36683	7.17168	10.7671	2.75365	3.23822	7.70092	7.37809	4.2117	7.33464	12.5141	1	74738921	74749221	-	protein_coding	Prkag3
ENSMUSG00000106915	16.1508	-1.02337	0.233533	-4.38213	1.18e-05	0.000163567	5	120255257	120256391	+	TEC	Gm42655	ENSMUSG00000106915	2.5003	1.22477	10.8204	27.3967	29.4119	42.2772	49.2066	37.0512	23.345	38.2982	9.46732	11.585	2.93649	6.88413	8.09555	4.49221	9.22261	0	4.88976	3.91065	5	120255257	120256391	+	TEC	Gm42655
ENSMUSG00000058396	181.668	-1.02294	0.126505	-8.08619	6.16e-16	4.96e-13	10	127747275	127751732	-	protein_coding	Gpr182	ENSMUSG00000058396	190.023	273.124	279.166	167.668	305.674	340.704	221.43	201.135	297	208.512	84.0224	105.369	84.1795	130.798	110.909	130.274	121.738	95.8162	144.248	141.566	10	127747275	127751732	-	protein_coding	Gpr182
ENSMUSG00000053914	147.742	-1.02262	0.160321	-6.3786	1.79e-10	2.14e-08	9	14462547	14500482	-	protein_coding	Kdm4d	ENSMUSG00000053914	118.764	83.2843	192.603	220.269	290.968	228.794	293.1	144.235	224.371	254.257	89.9395	111.437	92.989	89.4937	57.4784	75.7257	87.6148	121.086	99.4251	78.9952	9	14462547	14500482	-	protein_coding	Kdm4d
ENSMUSG00000049037	21.6962	-1.02133	0.210321	-4.85604	1.2e-06	2.58e-05	6	122921847	122934619	+	protein_coding	Clec4a1	ENSMUSG00000049037	17.5021	19.5963	12.9845	24.1091	31.5128	43.9351	45.9975	54.2535	45.3931	23.4044	7.10049	13.7917	5.87299	5.5073	13.7624	19.8941	7.37809	8.4234	16.2992	17.2069	6	122921847	122934619	+	protein_coding	Clec4a1
ENSMUSG00000026822	510.355	-1.01755	0.214514	-4.74351	2.1e-06	4.06e-05	2	32384632	32388252	-	protein_coding	Lcn2	ENSMUSG00000026822	40.0048	2888.01	135.255	272.871	271.01	826.477	213.942	89.9815	4719.58	258.513	11.8341	70.6135	84.1795	82.6096	67.193	63.5326	19.3675	8.4234	58.6771	25.0282	2	32384632	32388252	-	protein_coding	Lcn2
ENSMUSG00000067882	25.5531	-1.01678	0.185904	-5.4694	4.52e-08	1.87e-06	17	23550964	23555704	-	polymorphic_pseudogene	Casp16	ENSMUSG00000067882	42.5051	15.922	23.8049	46.0264	43.0674	43.1061	51.346	38.3745	19.4542	39.362	9.46732	21.515	15.6613	11.0146	13.7624	17.3271	17.523	7.37048	20.374	14.0783	17	23550964	23555704	-	polymorphic_pseudogene	Casp16
ENSMUSG00000035860	263.426	-1.01571	0.176609	-5.75122	8.86e-09	4.9e-07	12	33033795	33092875	-	protein_coding	Cdhr3	ENSMUSG00000035860	231.278	188.614	334.351	362.732	555.675	456.759	440.72	272.591	422.804	425.535	175.145	214.599	137.036	181.741	72.8599	56.4734	179.841	165.309	220.039	174.415	12	33033795	33092875	-	protein_coding	Cdhr3
ENSMUSG00000090308	9.11926	-1.01465	0.233339	-4.34838	1.37e-05	0.000185573	10	86655957	86657380	+	processed_pseudogene	Gm5174	ENSMUSG00000090308	13.7517	11.0229	2.16408	16.438	16.8068	18.2372	6.41826	30.4349	16.8603	14.8937	2.36683	9.37835	6.85182	0	4.85733	0	1.84452	2.10585	3.25984	4.69278	10	86655957	86657380	+	processed_pseudogene	Gm5174
ENSMUSG00000059108	26.0125	-1.01395	0.22975	-4.41327	1.02e-05	0.000145751	7	141015698	141017924	-	protein_coding	Ifitm6	ENSMUSG00000059108	7.50091	26.9449	12.9845	30.6843	24.1598	33.9875	44.9278	27.7884	160.821	30.8513	16.5678	15.4467	7.83065	13.7683	11.3338	10.2679	10.1449	8.4234	19.559	6.25704	7	141015698	141017924	-	protein_coding	Ifitm6
ENSMUSG00000112991	9.02845	-1.0129	0.232354	-4.35929	1.3e-05	0.000178049	12	111703081	111705550	+	lncRNA	Gm36635	ENSMUSG00000112991	12.5015	18.3715	5.4102	30.6843	11.5547	18.2372	16.0456	5.29303	12.9694	10.6384	4.73366	2.75834	12.7248	1.37683	1.61911	1.28349	5.53356	0	5.70472	3.12852	12	111703081	111705550	+	lncRNA	Gm36635
ENSMUSG00000111340	73.0756	-1.01287	0.18029	-5.61803	1.93e-08	9.33e-07	9	123644193	123646987	-	TEC	Gm47171	ENSMUSG00000111340	42.5051	57.5642	48.6918	108.491	153.362	133.463	120.877	109.83	132.288	119.15	27.2185	38.0651	41.1109	52.3194	40.4777	55.1899	25.8233	58.9638	56.2322	39.8886	9	123644193	123646987	-	TEC	Gm47171
ENSMUSG00000118626	4.26429	-1.0127	0.226283	-4.47535	7.63e-06	0.000116263	8	88109785	88110972	+	processed_pseudogene	AC127285.1	ENSMUSG00000118626	5.0006	12.2477	2.16408	4.38347	4.2017	6.63171	8.55767	5.29303	20.7511	6.38303	0	2.20667	1.95766	5.5073	0	0	0	0	0	0	8	88109785	88110972	+	processed_pseudogene	AC127285.1
ENSMUSG00000101750	40.0476	-1.01246	0.204803	-4.94359	7.67e-07	1.79e-05	11	49285281	49295891	+	protein_coding	Olfr1392	ENSMUSG00000101750	26.2532	23.2706	31.3792	73.4231	59.8743	98.6467	58.834	59.5466	79.1136	65.958	28.4019	33.6517	19.5766	28.9133	7.28599	8.98441	29.5123	25.2702	20.374	22.6818	11	49285281	49295891	+	protein_coding	Olfr1392
ENSMUSG00000078838	68.6535	-1.01187	0.197514	-5.12301	3.01e-07	8.45e-06	17	26860270	26886202	-	lncRNA	Gm17382	ENSMUSG00000078838	45.0054	23.2706	62.7583	94.2445	167.018	111.081	170.084	76.7489	101.162	129.788	27.2185	47.9951	40.1321	24.7829	38.8586	32.7289	60.8692	37.9053	40.748	40.6708	17	26860270	26886202	-	lncRNA	Gm17382
ENSMUSG00000106858	197.704	-1.01142	0.220083	-4.59562	4.31e-06	7.29e-05	6	17914995	17920600	+	TEC	Gm43844	ENSMUSG00000106858	140.017	63.688	159.06	259.72	485.297	467.536	441.79	306.996	193.245	414.897	81.6556	190.325	152.698	134.929	76.9077	66.0996	115.283	48.4346	74.1613	81.3416	6	17914995	17920600	+	TEC	Gm43844
ENSMUSG00000009628	103.629	-1.00981	0.176034	-5.73647	9.67e-09	5.26e-07	8	33516737	33585582	+	protein_coding	Tex15	ENSMUSG00000009628	63.7577	75.9357	240.213	116.162	160.715	159.99	240.685	88.6582	127.101	175.533	78.1054	89.9219	74.3912	64.7108	53.4306	47.489	58.1024	54.7521	50.5275	52.4027	8	33516737	33585582	+	protein_coding	Tex15
ENSMUSG00000092539	12.2672	-1.00914	0.209559	-4.81553	1.47e-06	3.05e-05	17	26861420	26898531	+	lncRNA	Gm20468	ENSMUSG00000092539	16.252	11.0229	14.0665	19.7256	26.2606	14.0924	18.1851	13.2326	19.4542	25.5321	5.91707	8.27502	9.78832	9.63778	0	8.98441	9.22261	5.26463	6.51968	3.91065	17	26861420	26898531	+	lncRNA	Gm20468
ENSMUSG00000108391	70.6999	-1.00842	0.182658	-5.52082	3.37e-08	1.49e-06	4	152006758	152009619	-	TEC	Gm9768	ENSMUSG00000108391	56.2568	36.7431	81.153	110.683	158.614	153.358	126.226	88.6582	81.7075	100.001	39.0527	55.7185	50.8992	44.0584	34.0013	26.9532	60.8692	23.1644	35.0433	50.8385	4	152006758	152009619	-	TEC	Gm9768
ENSMUSG00000107365	2.9887	-1.00688	0.229866	-4.38028	1.19e-05	0.000164515	6	39240113	39242541	+	lncRNA	Gm43479	ENSMUSG00000107365	2.5003	1.22477	3.24612	5.47933	8.4034	9.11861	5.34855	6.61629	3.89083	6.38303	0	0.551668	1.95766	0	0	2.56697	0.922261	0	0	1.56426	6	39240113	39242541	+	lncRNA	Gm43479
ENSMUSG00000046694	82.1416	-1.00587	0.225502	-4.46059	8.17e-06	0.000122833	4	133480131	133487938	+	protein_coding	Tent5b	ENSMUSG00000046694	52.5063	39.1926	43.2816	151.23	276.262	187.346	147.62	134.972	102.459	101.065	18.9346	33.6517	74.3912	61.9572	37.2395	26.3115	14.7562	30.5348	48.8976	60.224	4	133480131	133487938	+	protein_coding	Tent5b
ENSMUSG00000086943	84.5484	-1.00546	0.174245	-5.7704	7.91e-09	4.47e-07	11	73015855	73018841	-	lncRNA	4732414G09Rik	ENSMUSG00000086943	60.0072	61.2385	103.876	151.23	122.9	138.437	175.432	132.326	85.5984	147.873	66.2712	66.2001	64.6029	55.073	27.5249	30.8037	47.9576	31.5878	58.6771	63.3526	11	73015855	73018841	-	lncRNA	4732414G09Rik
ENSMUSG00000003617	1147.08	-1.00384	0.13265	-7.56761	3.8e-14	1.74e-11	3	19957053	20009145	+	protein_coding	Cp	ENSMUSG00000003617	926.362	1643.64	1210.8	1285.45	1548.33	1742.48	1485.83	1231.95	2971.3	1604.27	607.092	797.712	740.975	709.065	742.362	840.042	536.756	750.736	789.696	776.655	3	19957053	20009145	+	protein_coding	Cp
ENSMUSG00000057000	16.3288	-1.00333	0.218607	-4.58964	4.44e-06	7.47e-05	X	136072098	136085255	-	protein_coding	Nxf3	ENSMUSG00000057000	10.0012	7.34862	22.7229	19.7256	27.3111	33.1586	27.8124	31.7582	32.4236	29.7875	4.73366	15.9984	18.5978	5.5073	4.04777	8.34267	9.22261	2.10585	8.1496	7.8213	X	136072098	136085255	-	protein_coding	Nxf3
ENSMUSG00000101741	39.0083	-1.00133	0.211956	-4.72423	2.31e-06	4.4e-05	1	51696323	51746943	-	lncRNA	Gm28055	ENSMUSG00000101741	41.255	14.6972	81.153	77.8065	45.1683	63.8302	74.8797	46.314	38.9083	81.9155	30.7688	29.2384	29.3649	23.406	4.85733	6.41744	21.212	28.429	16.2992	24.246	1	51696323	51746943	-	lncRNA	Gm28055
ENSMUSG00000083803	12.3318	-0.999827	0.220103	-4.54255	5.56e-06	8.95e-05	4	44382921	44383337	+	processed_pseudogene	Gm12455	ENSMUSG00000083803	21.2526	12.2477	16.2306	13.1504	13.6555	19.0662	21.3942	35.7279	12.9694	17.0214	7.10049	9.37835	3.91533	5.5073	1.61911	1.28349	11.0671	6.31755	13.0394	4.69278	4	44382921	44383337	+	processed_pseudogene	Gm12455
ENSMUSG00000112916	13.5418	-0.998865	0.231252	-4.31939	1.56e-05	0.000206243	12	32930123	32930718	+	processed_pseudogene	Gm18622	ENSMUSG00000112916	11.2514	4.89908	16.2306	21.9173	40.9666	35.6455	32.0913	13.2326	5.18778	28.7236	2.36683	9.37835	8.80948	2.75365	0.809555	6.41744	10.1449	3.15878	10.5945	6.25704	12	32930123	32930718	+	processed_pseudogene	Gm18622
ENSMUSG00000109703	8.9198	-0.996839	0.23007	-4.33276	1.47e-05	0.000196294	7	141051588	141053022	+	transcribed_processed_pseudogene	Gm45299	ENSMUSG00000109703	7.50091	13.4725	9.73836	14.2463	7.35298	23.211	17.1153	5.29303	11.6725	27.6598	2.36683	5.51668	4.89416	0	5.66688	2.56697	2.76678	8.4234	8.1496	0.78213	7	141051588	141053022	+	transcribed_processed_pseudogene	Gm45299
ENSMUSG00000044359	12.7871	-0.996439	0.226908	-4.39138	1.13e-05	0.00015805	X	100590153	100594869	-	protein_coding	P2ry4	ENSMUSG00000044359	7.50091	2.44954	0	8.76693	37.8153	44.7641	37.4398	37.0512	23.345	25.5321	0	4.41334	3.91533	5.5073	3.23822	0	0	2.10585	4.0748	7.8213	X	100590153	100594869	-	protein_coding	P2ry4
ENSMUSG00000104708	22.4572	-0.995537	0.216106	-4.60671	4.09e-06	6.98e-05	5	143770039	143773745	+	TEC	Gm42503	ENSMUSG00000104708	15.0018	19.5963	25.969	12.0545	57.7734	43.1061	45.9975	29.1117	35.0175	44.6812	7.10049	15.4467	23.492	15.1451	16.1911	3.85046	5.53356	8.4234	15.4842	10.1677	5	143770039	143773745	+	TEC	Gm42503
ENSMUSG00000033576	38.4567	-0.995288	0.21541	-4.62043	3.83e-06	6.6e-05	15	77044728	77057106	+	protein_coding	Apol6	ENSMUSG00000033576	17.5021	24.4954	59.5122	55.8892	86.1349	94.5019	79.1585	26.4651	32.4236	85.107	9.46732	24.8251	35.2379	27.5365	6.47644	17.9688	23.0565	18.9527	15.4842	28.9388	15	77044728	77057106	+	protein_coding	Apol6
ENSMUSG00000102780	82.3986	-0.994837	0.149464	-6.65601	2.81e-11	4.61e-09	3	106725598	106730276	+	TEC	Gm38253	ENSMUSG00000102780	80.0097	55.1146	99.5477	105.203	175.421	139.266	134.783	131.002	93.38	117.022	52.0702	53.5118	35.2379	39.928	70.4313	59.6822	57.1802	51.5933	53.7873	43.7993	3	106725598	106730276	+	TEC	Gm38253
ENSMUSG00000088071	17.3989	-0.994772	0.217897	-4.56533	4.99e-06	8.19e-05	15	86212553	86212657	-	snRNA	Gm22818	ENSMUSG00000088071	18.7523	29.3945	28.1331	26.3008	12.6051	5.80275	39.5792	15.8791	51.8778	27.6598	10.6507	10.4817	11.746	9.63778	6.47644	7.05918	12.9117	5.26463	13.8543	3.91065	15	86212553	86212657	-	snRNA	Gm22818
ENSMUSG00000094942	78.1804	-0.994191	0.150297	-6.61486	3.72e-11	5.82e-09	13	62368327	62383177	-	protein_coding	Gm3604	ENSMUSG00000094942	71.2586	44.0917	88.7273	115.066	113.446	157.503	125.156	136.295	92.0831	126.597	48.52	47.9951	54.8146	57.8267	46.9542	51.9812	37.8127	57.9109	48.8976	40.6708	13	62368327	62383177	-	protein_coding	Gm3604
ENSMUSG00000101605	13.7791	-0.992147	0.231564	-4.28454	1.83e-05	0.000233638	11	105994674	106005443	+	protein_coding	Ace3	ENSMUSG00000101605	5.0006	2.44954	9.73836	29.5884	35.7145	33.9875	45.9975	10.5861	16.8603	23.4044	3.55024	8.82669	13.7036	5.5073	6.47644	3.20872	3.68904	5.26463	7.33464	4.69278	11	105994674	106005443	+	protein_coding	Ace3
ENSMUSG00000110378	43.2546	-0.991622	0.164892	-6.01376	1.81e-09	1.36e-07	8	64945589	64947718	-	TEC	Gm45242	ENSMUSG00000110378	46.2556	47.766	49.7739	58.0809	58.8238	73.7778	52.4158	71.4559	79.1136	58.5111	26.0351	28.1351	32.3014	28.9133	24.2866	11.5514	23.0565	40.0112	40.748	14.0783	8	64945589	64947718	-	TEC	Gm45242
ENSMUSG00000114424	57.4396	-0.991111	0.16306	-6.07818	1.22e-09	9.86e-08	14	29958070	29961381	-	lncRNA	Gm47414	ENSMUSG00000114424	33.7541	61.2385	77.9069	113.97	86.1349	95.3309	101.622	68.8094	60.9564	92.5539	46.1532	48.5468	40.1321	33.0438	30.7631	29.5202	44.2685	20.0056	37.4882	26.5924	14	29958070	29961381	-	lncRNA	Gm47414
ENSMUSG00000112301	27.3267	-0.989927	0.187408	-5.2822	1.28e-07	4.24e-06	10	115315645	115316374	+	TEC	Gm10752	ENSMUSG00000112301	18.7523	35.5183	35.7073	64.6561	58.8238	23.211	39.5792	46.314	33.7206	29.7875	10.6507	22.6184	11.746	8.26096	17.0006	14.7601	12.9117	24.2173	18.7441	19.5533	10	115315645	115316374	+	TEC	Gm10752
ENSMUSG00000000318	50.6297	-0.989434	0.19831	-4.98934	6.06e-07	1.49e-05	11	70156196	70170834	+	protein_coding	Clec10a	ENSMUSG00000000318	56.2568	105.33	99.5477	87.6693	44.1179	41.4482	48.1369	52.9303	143.961	42.5535	23.6683	27.5834	17.619	13.7683	22.6675	40.4298	19.3675	40.0112	45.6377	39.8886	11	70156196	70170834	+	protein_coding	Clec10a
ENSMUSG00000047671	14.2109	-0.989148	0.216614	-4.5664	4.96e-06	8.17e-05	4	117126793	117128738	+	protein_coding	Tctex1d4	ENSMUSG00000047671	32.5039	25.7202	32.4612	13.1504	28.3615	16.5793	21.3942	15.8791	15.5633	6.38303	10.6507	11.0334	4.89416	9.63778	2.42866	7.70092	1.84452	10.5293	7.33464	10.1677	4	117126793	117128738	+	protein_coding	Tctex1d4
ENSMUSG00000107994	137.696	-0.988314	0.148354	-6.66185	2.7e-11	4.53e-09	6	115675967	115677780	+	lncRNA	D830050J10Rik	ENSMUSG00000107994	136.266	84.5091	149.322	248.762	226.892	222.991	227.848	190.549	154.336	240.427	95.8566	91.0252	122.354	86.74	55.0497	65.4578	90.3816	86.3399	89.6456	89.1629	6	115675967	115677780	+	lncRNA	D830050J10Rik
ENSMUSG00000071537	115.175	-0.987589	0.174429	-5.66183	1.5e-08	7.57e-07	6	38625692	38637242	-	protein_coding	Klrg2	ENSMUSG00000071537	103.763	89.4082	113.614	149.038	173.32	163.306	143.341	125.709	312.564	224.47	44.9697	61.7868	88.0948	104.639	38.8586	48.7725	77.4699	90.5516	69.2716	80.5594	6	38625692	38637242	-	protein_coding	Klrg2
ENSMUSG00000108553	25.8692	-0.985566	0.201166	-4.89927	9.62e-07	2.16e-05	7	25584223	25594776	+	lncRNA	Gm38569	ENSMUSG00000108553	16.252	15.922	24.8869	40.5471	40.9666	58.0275	51.346	38.3745	40.2053	41.4897	2.36683	13.7917	22.5131	16.5219	8.9051	12.8349	18.4452	22.1114	14.6693	17.2069	7	25584223	25594776	+	lncRNA	Gm38569
ENSMUSG00000025407	432.791	-0.98431	0.153283	-6.42151	1.35e-10	1.72e-08	10	127329881	127341974	-	protein_coding	Gli1	ENSMUSG00000025407	466.306	496.032	611.353	519.441	829.836	600.17	737.03	486.959	582.328	598.941	169.228	306.176	387.617	408.917	208.865	124.498	283.134	232.696	391.996	214.304	10	127329881	127341974	-	protein_coding	Gli1
ENSMUSG00000036292	252.732	-0.98392	0.155922	-6.31034	2.78e-10	3.1e-08	16	43980349	44063345	-	protein_coding	Gramd1c	ENSMUSG00000036292	172.521	175.142	218.572	447.114	415.968	524.734	459.975	285.824	386.49	380.854	115.975	184.257	202.618	172.103	152.196	155.944	176.152	143.198	143.433	141.566	16	43980349	44063345	-	protein_coding	Gramd1c
ENSMUSG00000036587	48.4433	-0.983337	0.207975	-4.72815	2.27e-06	4.34e-05	2	25423266	25426374	+	protein_coding	Fut7	ENSMUSG00000036587	32.5039	34.2935	24.8869	84.3817	121.849	93.6729	82.3676	104.537	33.7206	85.107	17.7512	29.7901	41.1109	12.3914	30.7631	23.7445	42.424	14.741	23.6338	35.1959	2	25423266	25426374	+	protein_coding	Fut7
ENSMUSG00000022996	931.16	-0.983144	0.233059	-4.21843	2.46e-05	0.000297299	15	98770711	98778150	-	protein_coding	Wnt10b	ENSMUSG00000022996	602.573	274.348	856.976	2051.46	1789.92	2746.36	2441.08	1492.63	614.752	1763.84	139.643	841.845	809.494	671.891	122.243	148.885	510.932	244.279	239.598	260.449	15	98770711	98778150	-	protein_coding	Wnt10b
ENSMUSG00000116665	8.16723	-0.982913	0.232617	-4.22546	2.38e-05	0.000289656	16	34943174	34958994	-	lncRNA	E130310I04Rik	ENSMUSG00000116665	5.0006	1.22477	10.8204	23.0132	9.45383	25.6979	18.1851	6.61629	18.1572	9.57454	0	4.41334	4.89416	4.13048	4.85733	4.49221	0.922261	6.31755	2.44488	3.12852	16	34943174	34958994	-	lncRNA	E130310I04Rik
ENSMUSG00000037159	14.7641	-0.982879	0.210511	-4.66901	3.03e-06	5.49e-05	6	40439087	40466813	+	protein_coding	Wee2	ENSMUSG00000037159	20.0024	11.0229	20.5588	26.3008	24.1598	14.9214	26.7427	15.8791	27.2358	26.596	16.5678	4.96501	7.83065	1.37683	2.42866	10.2679	6.45583	6.31755	15.4842	10.1677	6	40439087	40466813	+	protein_coding	Wee2
ENSMUSG00000107622	10.0072	-0.982468	0.229535	-4.28026	1.87e-05	0.00023703	6	89269510	89285725	-	lncRNA	4930512J16Rik	ENSMUSG00000107622	20.0024	6.12385	4.32816	21.9173	25.2102	31.5006	4.27884	11.9093	19.4542	8.5107	2.36683	7.72335	3.91533	2.75365	2.42866	5.77569	5.53356	5.26463	4.88976	6.25704	6	89269510	89285725	-	lncRNA	4930512J16Rik
ENSMUSG00000105928	124.339	-0.982399	0.143782	-6.83256	8.34e-12	1.73e-09	12	115892883	115894303	+	processed_pseudogene	Gm9256	ENSMUSG00000105928	157.519	129.826	183.947	132.6	205.883	208.899	180.781	145.558	176.385	176.597	81.6556	84.4052	73.4124	38.5511	46.1446	129.632	71.9363	105.293	71.7165	86.0343	12	115892883	115894303	+	processed_pseudogene	Gm9256
ENSMUSG00000027656	21.4084	-0.981193	0.198601	-4.94053	7.79e-07	1.81e-05	2	163820860	163833146	+	protein_coding	Ccn5	ENSMUSG00000027656	42.5051	28.1697	22.7229	13.1504	44.1179	29.8427	52.4158	26.4651	20.7511	23.4044	14.201	10.4817	10.7671	8.26096	9.71466	14.7601	15.6784	18.9527	17.1142	4.69278	2	163820860	163833146	+	protein_coding	Ccn5
ENSMUSG00000021903	591.139	-0.981074	0.191341	-5.12736	2.94e-07	8.33e-06	14	32028988	32062197	+	protein_coding	Galnt15	ENSMUSG00000021903	311.288	509.504	494.493	756.148	1452.74	1172.98	838.652	644.426	1264.52	875.539	339.64	323.829	268.2	282.249	436.35	373.495	397.494	233.749	263.232	584.251	14	32028988	32062197	+	protein_coding	Galnt15
ENSMUSG00000045794	10.5503	-0.980799	0.230142	-4.26172	2.03e-05	0.000252519	2	181696792	181698442	-	protein_coding	Lkaaear1	ENSMUSG00000045794	7.50091	2.44954	9.73836	24.1091	13.6555	31.5006	17.1153	22.4954	11.6725	19.1491	7.10049	3.31001	3.91533	15.1451	1.61911	2.56697	3.68904	3.15878	4.0748	7.03917	2	181696792	181698442	-	protein_coding	Lkaaear1
ENSMUSG00000025727	26.1511	-0.980219	0.219842	-4.45874	8.24e-06	0.000123491	17	25946386	25952565	-	protein_coding	A930017K11Rik	ENSMUSG00000025727	30.0036	19.5963	35.7073	27.3967	109.244	27.3558	27.8124	31.7582	31.1267	45.745	7.10049	21.515	25.4496	5.5073	8.09555	12.8349	7.37809	8.4234	26.8937	14.0783	17	25946386	25952565	-	protein_coding	A930017K11Rik
ENSMUSG00000118449	174.225	-0.979035	0.142204	-6.88473	5.79e-12	1.3e-09	12	4589796	4593029	-	lncRNA	AC241534.1	ENSMUSG00000118449	190.023	126.151	188.275	232.324	288.867	293.453	274.915	292.44	189.354	294.683	86.3893	137.917	169.338	134.929	81.765	89.2024	113.438	89.4986	105.945	105.588	12	4589796	4593029	-	lncRNA	AC241534.1
ENSMUSG00000078122	8.9877	-0.978737	0.232473	-4.21011	2.55e-05	0.000306659	X	96239925	96243636	+	lncRNA	F630028O10Rik	ENSMUSG00000078122	7.50091	14.6972	11.9024	6.5752	4.2017	12.4345	25.673	13.2326	18.1572	26.596	2.36683	7.72335	0	5.5073	5.66688	7.70092	0	4.2117	3.25984	2.34639	X	96239925	96243636	+	lncRNA	F630028O10Rik
ENSMUSG00000084876	13.0512	-0.978025	0.230099	-4.25046	2.13e-05	0.000263097	19	6409399	6418606	-	lncRNA	Gm14965	ENSMUSG00000084876	5.0006	6.12385	15.1486	20.8215	38.8657	43.9351	21.3942	5.29303	25.9389	15.9576	9.46732	4.41334	2.93649	8.26096	4.04777	9.62615	1.84452	8.4234	5.70472	7.8213	19	6409399	6418606	-	lncRNA	Gm14965
ENSMUSG00000013928	19.6065	-0.976819	0.210309	-4.64469	3.41e-06	6.02e-05	7	30280093	30290237	+	protein_coding	Thap8	ENSMUSG00000013928	12.5015	8.57339	30.2971	48.2181	46.2187	31.5006	36.3701	15.8791	29.8297	21.2768	21.3015	10.4817	10.7671	11.0146	6.47644	6.41744	11.0671	14.741	10.5945	8.60343	7	30280093	30290237	+	protein_coding	Thap8
ENSMUSG00000027555	69.7509	-0.976034	0.162797	-5.9954	2.03e-09	1.5e-07	3	14641726	14663002	+	protein_coding	Car13	ENSMUSG00000027555	86.2604	64.9128	120.106	66.8479	77.7315	67.1461	163.666	72.7791	133.585	108.511	35.5024	47.9951	27.4073	28.9133	55.0497	48.7725	34.1236	52.6463	53.7873	49.2742	3	14641726	14663002	+	protein_coding	Car13
ENSMUSG00000090317	22.2878	-0.975529	0.20016	-4.87374	1.1e-06	2.41e-05	9	78447864	78448786	-	lncRNA	Gm17324	ENSMUSG00000090317	13.7517	9.79816	29.2151	44.9305	33.6136	54.7116	48.1369	23.8186	24.642	32.979	13.0176	17.6534	14.6825	12.3914	12.9529	9.62615	17.523	11.5822	9.77952	10.9498	9	78447864	78448786	-	lncRNA	Gm17324
ENSMUSG00000086765	70.1961	-0.974953	0.201917	-4.82849	1.38e-06	2.89e-05	4	11122804	11126998	+	lncRNA	Gm11827	ENSMUSG00000086765	43.7553	67.3623	62.7583	132.6	112.396	100.305	120.877	100.568	136.179	121.278	21.3015	59.0285	64.6029	59.2035	16.1911	19.8941	63.636	17.8997	29.3386	54.7491	4	11122804	11126998	+	lncRNA	Gm11827
ENSMUSG00000086050	23.2678	-0.974717	0.19596	-4.97407	6.56e-07	1.58e-05	11	117257648	117263437	-	lncRNA	Gm16045	ENSMUSG00000086050	26.2532	22.0458	28.1331	46.0264	52.5213	35.6455	32.0913	21.1721	20.7511	43.6174	9.46732	12.1367	19.5766	12.3914	4.85733	10.2679	19.3675	8.4234	17.9291	22.6818	11	117257648	117263437	-	lncRNA	Gm16045
ENSMUSG00000070369	94.3122	-0.974036	0.22479	-4.3331	1.47e-05	0.000196162	7	128154375	128223816	+	protein_coding	Itgad	ENSMUSG00000070369	81.2598	40.4174	124.435	126.025	259.455	114.397	186.129	67.4861	153.039	251.066	34.319	89.9219	99.8408	48.1889	14.572	21.8193	53.4911	32.6407	42.3779	45.3636	7	128154375	128223816	+	protein_coding	Itgad
ENSMUSG00000111748	8.65391	-0.973865	0.217875	-4.46983	7.83e-06	0.000118473	9	37312135	37324436	+	lncRNA	Gm34885	ENSMUSG00000111748	11.2514	11.0229	10.8204	9.8628	7.35298	21.5531	10.6971	13.2326	15.5633	14.8937	2.36683	7.17168	6.85182	6.88413	5.66688	1.92523	5.53356	3.15878	5.70472	1.56426	9	37312135	37324436	+	lncRNA	Gm34885
ENSMUSG00000090124	42.4241	-0.973818	0.176074	-5.53072	3.19e-08	1.42e-06	1	88095061	88220002	+	protein_coding	Ugt1a7c	ENSMUSG00000090124	25.003	62.4632	56.2661	56.9851	51.4708	72.9488	71.6705	60.8698	73.9259	57.4473	34.319	22.6184	40.1321	16.5219	23.4771	42.9968	11.0671	18.9527	21.189	28.1567	1	88095061	88220002	+	protein_coding	Ugt1a7c
ENSMUSG00000086910	7.10878	-0.973794	0.233284	-4.17428	2.99e-05	0.000350603	11	59375460	59379905	+	lncRNA	Gm15755	ENSMUSG00000086910	7.50091	8.57339	4.32816	1.09587	12.6051	20.7241	11.7668	22.4954	11.6725	10.6384	3.55024	3.31001	1.95766	5.5073	1.61911	0	3.68904	6.31755	3.25984	1.56426	11	59375460	59379905	+	lncRNA	Gm15755
ENSMUSG00000081835	4.22286	-0.973237	0.218194	-4.46042	8.18e-06	0.000122833	11	121165470	121165925	-	processed_pseudogene	Gm11790	ENSMUSG00000081835	0	0	3.24612	5.47933	14.706	23.211	8.55767	5.29303	5.18778	12.7661	0	0.551668	0.978832	0	0.809555	0	0	2.10585	0	1.56426	11	121165470	121165925	-	processed_pseudogene	Gm11790
ENSMUSG00000100188	10.6819	-0.972847	0.22635	-4.29798	1.72e-05	0.000221664	3	104661342	104664139	-	lncRNA	Gm29561	ENSMUSG00000100188	10.0012	3.67431	18.3947	14.2463	10.5043	23.211	19.2548	22.4954	9.07861	27.6598	2.36683	4.41334	10.7671	12.3914	3.23822	2.56697	1.84452	6.31755	6.51968	4.69278	3	104661342	104664139	-	lncRNA	Gm29561
ENSMUSG00000061923	5.42344	-0.972501	0.233527	-4.16441	3.12e-05	0.000362101	15	38219202	38226735	+	protein_coding	Odf1	ENSMUSG00000061923	2.5003	7.34862	8.65632	10.9587	4.2017	4.97378	14.9759	9.2628	14.2664	9.57454	2.36683	2.20667	4.89416	0	4.85733	0	3.68904	2.10585	1.62992	0	15	38219202	38226735	+	protein_coding	Odf1
ENSMUSG00000108624	21.6007	-0.971729	0.204126	-4.76044	1.93e-06	3.79e-05	7	35118043	35119605	-	lncRNA	Gm45091	ENSMUSG00000108624	31.2538	15.922	38.9535	23.0132	33.6136	53.0537	42.7884	14.5558	27.2358	24.4683	21.3015	8.27502	13.7036	22.0292	10.5242	5.13395	8.30035	8.4234	13.0394	16.4247	7	35118043	35119605	-	lncRNA	Gm45091
ENSMUSG00000079507	20.5877	-0.970809	0.22961	-4.22807	2.36e-05	0.000286989	17	35320404	35325099	+	protein_coding	H2-Q1	ENSMUSG00000079507	57.5069	15.922	9.73836	21.9173	48.3196	18.2372	12.8365	31.7582	63.5503	32.979	4.73366	8.27502	7.83065	5.5073	9.71466	3.85046	5.53356	33.6936	7.33464	12.5141	17	35320404	35325099	+	protein_coding	H2-Q1
ENSMUSG00000079243	28.3751	-0.970226	0.190915	-5.08197	3.74e-07	1e-05	9	120013754	120023598	-	protein_coding	Xirp1	ENSMUSG00000079243	42.5051	19.5963	46.5277	40.5471	59.8743	40.6192	34.2307	47.6373	19.4542	45.745	8.2839	13.7917	31.3226	27.5365	23.4771	15.4018	11.0671	12.6351	16.2992	10.9498	9	120013754	120023598	-	protein_coding	Xirp1
ENSMUSG00000033855	278.718	-0.970155	0.104592	-9.27561	1.77e-20	5.41e-17	17	88597683	88662586	+	protein_coding	Ston1	ENSMUSG00000033855	257.531	307.417	374.386	349.582	406.515	473.339	381.886	336.107	461.712	388.301	215.381	190.325	170.317	184.495	192.674	226.535	125.427	174.786	160.547	197.097	17	88597683	88662586	+	protein_coding	Ston1
ENSMUSG00000108967	2.32541	-0.969653	0.218793	-4.43182	9.34e-06	0.000136107	7	145162995	145166957	+	lncRNA	Gm45181	ENSMUSG00000108967	1.25015	3.67431	1.08204	7.67107	5.25213	10.7765	6.41826	2.64651	2.59389	2.12768	0	0	0	0	0.809555	0.641744	0	0	0	1.56426	7	145162995	145166957	+	lncRNA	Gm45181
ENSMUSG00000101581	11.5036	-0.969531	0.227399	-4.26356	2.01e-05	0.000250546	9	96765561	96782477	+	lncRNA	C430002N11Rik	ENSMUSG00000101581	5.0006	6.12385	15.1486	23.0132	21.0085	22.382	26.7427	10.5861	11.6725	30.8513	2.36683	7.72335	13.7036	6.88413	4.85733	3.85046	1.84452	5.26463	2.44488	8.60343	9	96765561	96782477	+	lncRNA	C430002N11Rik
ENSMUSG00000113391	30.0094	-0.968843	0.216139	-4.4825	7.38e-06	0.000113159	13	8797301	8798402	-	TEC	Gm48327	ENSMUSG00000113391	13.7517	17.1468	22.7229	44.9305	66.1768	72.9488	59.9037	22.4954	57.0656	58.5111	7.10049	19.86	30.3438	13.7683	12.1433	7.70092	16.6007	22.1114	12.2244	22.6818	13	8797301	8798402	-	TEC	Gm48327
ENSMUSG00000085049	31.4635	-0.968682	0.201478	-4.80787	1.53e-06	3.15e-05	7	112526971	112535683	-	lncRNA	Parvaos	ENSMUSG00000085049	18.7523	45.3165	37.8714	46.0264	61.9751	48.0799	49.2066	26.4651	53.1747	58.5111	14.201	16.55	33.2803	24.7829	4.85733	12.1931	11.0671	14.741	34.2283	17.989	7	112526971	112535683	-	lncRNA	Parvaos
ENSMUSG00000098221	136.326	-0.968377	0.149088	-6.49534	8.28e-11	1.18e-08	8	121654053	121654517	+	lncRNA	Gm27030	ENSMUSG00000098221	126.265	104.105	196.931	221.365	232.144	227.136	265.288	154.821	114.131	214.895	60.3541	105.92	112.566	81.2327	76.9077	70.5918	88.537	68.4401	96.1653	108.716	8	121654053	121654517	+	lncRNA	Gm27030
ENSMUSG00000059089	22.3782	-0.967294	0.231539	-4.17768	2.95e-05	0.000346047	1	171018919	171029761	+	protein_coding	Fcgr4	ENSMUSG00000059089	10.0012	88.1834	8.65632	17.5339	4.2017	31.5006	34.2307	7.93954	155.633	14.8937	11.8341	5.51668	1.95766	19.2756	1.61911	5.13395	5.53356	6.31755	9.77952	7.8213	1	171018919	171029761	+	protein_coding	Fcgr4
ENSMUSG00000009248	62.2566	-0.967109	0.209486	-4.61658	3.9e-06	6.71e-05	7	142966828	142969264	-	protein_coding	Ascl2	ENSMUSG00000009248	66.258	33.0688	70.3326	96.4363	116.597	143.411	111.25	48.9605	86.8953	119.15	33.1356	56.2701	63.624	46.8121	9.71466	14.7601	36.8904	14.741	43.1929	33.6316	7	142966828	142969264	-	protein_coding	Ascl2
ENSMUSG00000097513	9.26897	-0.967085	0.226535	-4.26902	1.96e-05	0.000246395	6	4593803	4596651	-	TEC	Gm26696	ENSMUSG00000097513	5.0006	4.89908	16.2306	19.7256	13.6555	8.28964	20.3245	26.4651	5.18778	18.0852	7.10049	4.96501	1.95766	9.63778	4.85733	2.56697	3.68904	3.15878	4.88976	4.69278	6	4593803	4596651	-	TEC	Gm26696
ENSMUSG00000038630	1640.29	-0.966966	0.120424	-8.0297	9.77e-16	6.96e-13	4	58943627	58958355	+	protein_coding	Zkscan16	ENSMUSG00000038630	1671.45	1439.1	2023.42	1727.09	2914.93	3222.18	2812.27	1746.7	1905.21	2615.98	1105.31	1283.18	997.429	1130.37	959.322	1162.2	876.148	950.791	1145.02	1117.66	4	58943627	58958355	+	protein_coding	Zkscan16
ENSMUSG00000022032	49.352	-0.966446	0.216455	-4.46488	8.01e-06	0.00012077	14	65666402	65764826	+	protein_coding	Scara5	ENSMUSG00000022032	43.7553	53.8899	73.5788	43.8347	54.6221	137.608	59.9037	33.0814	154.336	62.7664	14.201	35.8584	17.619	37.1743	35.6204	18.6106	35.0459	12.6351	8.1496	54.7491	14	65666402	65764826	+	protein_coding	Scara5
ENSMUSG00000117488	12.1261	-0.965853	0.233527	-4.13593	3.54e-05	0.000399785	17	23902565	23925497	-	lncRNA	Gm41545	ENSMUSG00000117488	1.25015	6.12385	19.4767	42.7388	22.0589	39.7903	14.9759	14.5558	2.59389	30.8513	4.73366	3.31001	5.87299	0	8.09555	5.13395	5.53356	1.05293	7.33464	7.03917	17	23902565	23925497	-	lncRNA	Gm41545
ENSMUSG00000113159	10.8044	-0.964155	0.227634	-4.23554	2.28e-05	0.000278941	12	100862785	100864689	+	TEC	Gm48771	ENSMUSG00000113159	7.50091	4.89908	12.9845	9.8628	16.8068	23.211	11.7668	11.9093	37.6114	24.4683	9.46732	5.51668	10.7671	9.63778	4.04777	3.20872	3.68904	3.15878	2.44488	3.12852	12	100862785	100864689	+	TEC	Gm48771
ENSMUSG00000042828	330.348	-0.962759	0.174406	-5.52023	3.39e-08	1.49e-06	7	128003948	128011033	+	protein_coding	Trim72	ENSMUSG00000042828	276.283	229.032	175.291	534.783	649.163	909.374	544.482	414.18	368.332	459.578	179.879	242.734	250.581	169.35	219.389	175.838	177.996	227.432	167.067	236.203	7	128003948	128011033	+	protein_coding	Trim72
ENSMUSG00000110998	13.2907	-0.962726	0.221182	-4.35265	1.35e-05	0.000182716	9	61138514	61145259	+	lncRNA	I730028E13Rik	ENSMUSG00000110998	25.003	24.4954	10.8204	19.7256	12.6051	17.4082	12.8365	27.7884	27.2358	17.0214	7.10049	8.82669	2.93649	13.7683	4.85733	2.56697	4.6113	7.37048	1.62992	17.2069	9	61138514	61145259	+	lncRNA	I730028E13Rik
ENSMUSG00000021751	6.88436	-0.961333	0.226472	-4.24483	2.19e-05	0.000268939	14	8225510	8259353	-	protein_coding	Acox2	ENSMUSG00000021751	15.0018	11.0229	8.65632	9.8628	16.8068	4.14482	11.7668	7.93954	6.48472	10.6384	4.73366	3.86168	2.93649	8.26096	1.61911	4.49221	1.84452	2.10585	0.81496	4.69278	14	8225510	8259353	-	protein_coding	Acox2
ENSMUSG00000036330	68.7838	-0.961301	0.176188	-5.45612	4.87e-08	1.96e-06	8	69037710	69089235	-	protein_coding	Slc18a1	ENSMUSG00000036330	63.7577	56.3394	125.517	105.203	72.4794	102.792	127.295	76.7489	76.5197	144.682	22.4849	51.3051	69.497	26.1597	29.144	30.1619	39.6572	48.4346	66.8267	40.6708	8	69037710	69089235	-	protein_coding	Slc18a1
ENSMUSG00000094772	110.576	-0.961073	0.199963	-4.80624	1.54e-06	3.17e-05	13	4609333	4615025	+	transcribed_processed_pseudogene	Rpl29-ps2	ENSMUSG00000094772	145.018	105.33	160.142	108.491	224.791	119.371	284.543	103.214	63.5503	247.874	87.5727	78.3368	60.6876	57.8267	33.1917	36.5794	90.3816	40.0112	125.504	39.1065	13	4609333	4615025	+	transcribed_processed_pseudogene	Rpl29-ps2
ENSMUSG00000057969	208.211	-0.960042	0.132158	-7.26433	3.75e-13	1.33e-10	9	107597673	107609229	-	protein_coding	Sema3b	ENSMUSG00000057969	247.53	289.046	377.632	278.35	396.01	283.506	284.543	173.347	272.358	206.385	170.412	136.262	143.888	128.045	108.48	139.9	89.4593	118.981	198.85	121.23	9	107597673	107609229	-	protein_coding	Sema3b
ENSMUSG00000102997	137.379	-0.96001	0.161066	-5.96037	2.52e-09	1.77e-07	4	123113348	123116764	-	TEC	Gm17244	ENSMUSG00000102997	108.763	104.105	219.654	189.585	286.766	242.058	223.569	154.821	156.93	191.491	66.2712	107.024	150.74	93.6242	65.5739	64.1744	103.293	69.4931	83.9409	65.6989	4	123113348	123116764	-	TEC	Gm17244
ENSMUSG00000086124	36.2138	-0.959931	0.20695	-4.63847	3.51e-06	6.15e-05	14	45660769	45668498	-	lncRNA	A530076I17Rik	ENSMUSG00000086124	22.5027	18.3715	63.8404	59.1768	72.4794	46.422	87.7162	21.1721	49.2839	74.4687	15.3844	25.3767	21.5343	24.7829	10.5242	8.98441	30.4346	29.4819	22.0039	20.3354	14	45660769	45668498	-	lncRNA	A530076I17Rik
ENSMUSG00000105437	15.0124	-0.959379	0.230786	-4.15701	3.22e-05	0.000372341	5	29886727	29891964	-	lncRNA	Gm42450	ENSMUSG00000105437	10.0012	4.89908	11.9024	23.0132	42.017	33.1586	20.3245	18.5256	33.7206	29.7875	9.46732	2.75834	11.746	13.7683	0	3.85046	3.68904	11.5822	9.77952	6.25704	5	29886727	29891964	-	lncRNA	Gm42450
ENSMUSG00000059901	130.88	-0.959248	0.217452	-4.41132	1.03e-05	0.000146974	10	61197111	61273438	-	protein_coding	Adamts14	ENSMUSG00000059901	71.2586	91.8577	47.6098	219.173	332.985	254.492	204.314	136.295	378.708	164.895	37.8693	54.6151	110.608	85.3632	90.6701	58.3987	75.6254	48.4346	66.8267	87.5986	10	61197111	61273438	-	protein_coding	Adamts14
ENSMUSG00000085862	19.5149	-0.958264	0.23013	-4.16401	3.13e-05	0.000362594	2	50296809	50433967	+	lncRNA	Gm13483	ENSMUSG00000085862	40.0048	31.844	22.7229	48.2181	4.2017	18.2372	57.7643	26.4651	6.48472	40.4258	7.10049	8.27502	6.85182	2.75365	8.9051	4.49221	18.4452	18.9527	4.0748	14.0783	2	50296809	50433967	+	lncRNA	Gm13483
ENSMUSG00000046070	19.0195	-0.956955	0.222155	-4.3076	1.65e-05	0.000215042	17	24865996	24882010	+	protein_coding	Igfals	ENSMUSG00000046070	11.2514	15.922	8.65632	17.5339	39.9162	49.7378	35.3004	22.4954	47.987	30.8513	0	13.24	9.78832	15.1451	13.7624	6.41744	9.22261	8.4234	12.2244	12.5141	17	24865996	24882010	+	protein_coding	Igfals
ENSMUSG00000040740	934.298	-0.956826	0.141512	-6.76146	1.37e-11	2.57e-09	4	141618823	141623821	-	protein_coding	Slc25a34	ENSMUSG00000040740	667.581	852.439	838.581	1254.77	1585.09	1867.66	1496.52	1071.84	1617.29	1393.63	494.667	801.022	435.58	670.514	708.36	562.167	676.939	574.897	609.59	506.82	4	141618823	141623821	-	protein_coding	Slc25a34
ENSMUSG00000117539	4.80493	-0.956561	0.207703	-4.60543	4.12e-06	7.02e-05	17	75861022	75889039	+	lncRNA	Gm4710	ENSMUSG00000117539	0	3.67431	0	8.76693	22.0589	24.8689	14.9759	3.96977	5.18778	10.6384	0	0	1.95766	0	0	0	0	0	0	0	17	75861022	75889039	+	lncRNA	Gm4710
ENSMUSG00000028150	86.3456	-0.955934	0.20454	-4.67358	2.96e-06	5.4e-05	3	94372793	94398276	+	protein_coding	Rorc	ENSMUSG00000028150	46.2556	58.7889	117.942	120.545	176.471	80.4095	193.617	117.77	143.961	169.15	33.1356	69.5102	102.777	88.1169	33.1917	28.8785	43.3463	22.1114	48.0826	32.8495	3	94372793	94398276	+	protein_coding	Rorc
ENSMUSG00000110389	26.0107	-0.954122	0.215582	-4.42581	9.61e-06	0.000139227	4	120644218	120648137	-	lncRNA	Gm45579	ENSMUSG00000110389	31.2538	15.922	21.6408	51.5057	39.9162	29.8427	57.7643	44.9907	15.5633	67.0218	17.7512	19.3084	3.91533	22.0292	11.3338	4.49221	14.7562	10.5293	19.559	21.1175	4	120644218	120648137	-	lncRNA	Gm45579
ENSMUSG00000105698	16.2723	-0.954059	0.194063	-4.91623	8.82e-07	2.01e-05	3	152106438	152107383	+	lncRNA	Gm31881	ENSMUSG00000105698	20.0024	13.4725	21.6408	21.9173	21.0085	33.9875	20.3245	19.8489	27.2358	28.7236	10.6507	14.3434	11.746	6.88413	8.09555	4.49221	17.523	5.26463	7.33464	10.9498	3	152106438	152107383	+	lncRNA	Gm31881
ENSMUSG00000113338	19.9792	-0.953382	0.219421	-4.34499	1.39e-05	0.000187802	13	15807242	15827537	+	lncRNA	A530046M15Rik	ENSMUSG00000113338	15.0018	20.8211	32.4612	33.9719	29.4119	66.3171	17.1153	29.1117	23.345	23.4044	9.46732	17.6534	13.7036	16.5219	4.04777	8.34267	1.84452	5.26463	12.2244	19.5533	13	15807242	15827537	+	lncRNA	A530046M15Rik
ENSMUSG00000056032	13.5734	-0.953368	0.219543	-4.34251	1.41e-05	0.000189596	11	116752166	116759373	+	lncRNA	BC018473	ENSMUSG00000056032	5.0006	4.89908	23.8049	31.7801	14.706	14.9214	22.4639	29.1117	19.4542	30.8513	10.6507	3.31001	5.87299	11.0146	9.71466	7.70092	9.22261	4.2117	6.51968	6.25704	11	116752166	116759373	+	lncRNA	BC018473
ENSMUSG00000036892	4.32689	-0.952438	0.229838	-4.14395	3.41e-05	0.000388209	7	30493621	30513402	+	protein_coding	Prodh2	ENSMUSG00000036892	6.25075	4.89908	5.4102	5.47933	17.8572	2.48689	8.55767	9.2628	11.6725	1.06384	0	1.10334	1.95766	5.5073	0	0	0	1.05293	1.62992	2.34639	7	30493621	30513402	+	protein_coding	Prodh2
ENSMUSG00000111090	54.4255	-0.95163	0.199627	-4.76704	1.87e-06	3.7e-05	10	29362147	29365345	+	TEC	Gm30698	ENSMUSG00000111090	40.0048	26.9449	44.3637	97.5321	97.6896	103.621	129.435	60.8698	72.6289	91.4901	30.7688	31.9967	56.7722	53.6962	16.1911	19.2523	38.735	23.1644	23.6338	29.721	10	29362147	29365345	+	TEC	Gm30698
ENSMUSG00000066682	7.42028	-0.950214	0.233416	-4.0709	4.68e-05	0.000501828	5	137865826	137871815	-	protein_coding	Pilrb2	ENSMUSG00000066682	2.5003	6.12385	9.73836	4.38347	26.2606	10.7765	27.8124	6.61629	12.9694	12.7661	3.55024	9.37835	0	1.37683	3.23822	1.28349	2.76678	2.10585	1.62992	3.12852	5	137865826	137871815	-	protein_coding	Pilrb2
ENSMUSG00000023349	14.8228	-0.94906	0.232082	-4.08933	4.33e-05	0.000468069	6	123229842	123247021	+	protein_coding	Clec4n	ENSMUSG00000023349	22.5027	48.9908	8.65632	26.3008	15.7564	16.5793	12.8365	18.5256	37.6114	21.2768	7.10049	2.20667	1.95766	2.75365	9.71466	14.1184	0	4.2117	8.1496	17.2069	6	123229842	123247021	+	protein_coding	Clec4n
ENSMUSG00000085693	6.14191	-0.948738	0.232865	-4.0742	4.62e-05	0.00049581	2	28092031	28093514	-	lncRNA	Gm13371	ENSMUSG00000085693	6.25075	7.34862	9.73836	8.76693	9.45383	19.8951	14.9759	7.93954	7.78167	3.19151	1.18341	0	2.93649	0	3.23822	4.49221	3.68904	6.31755	4.0748	1.56426	2	28092031	28093514	-	lncRNA	Gm13371
ENSMUSG00000073490	34.0199	-0.947564	0.218632	-4.33405	1.46e-05	0.000195487	1	173723426	173741747	-	protein_coding	Ifi207	ENSMUSG00000073490	32.5039	48.9908	22.7229	33.9719	42.017	72.9488	39.5792	11.9093	146.555	42.5535	11.8341	12.1367	27.4073	22.0292	8.09555	21.1775	21.212	25.2702	17.9291	19.5533	1	173723426	173741747	-	protein_coding	Ifi207
ENSMUSG00000031163	15.4849	-0.945439	0.21236	-4.45206	8.51e-06	0.000126717	X	8004199	8018492	-	protein_coding	Glod5	ENSMUSG00000031163	21.2526	7.34862	11.9024	19.7256	31.5128	34.8165	35.3004	22.4954	16.8603	21.2768	3.55024	15.9984	11.746	12.3914	8.9051	10.9096	4.6113	6.31755	6.51968	6.25704	X	8004199	8018492	-	protein_coding	Glod5
ENSMUSG00000109304	37.5227	-0.945022	0.194158	-4.86727	1.13e-06	2.47e-05	7	120629761	120634886	-	TEC	Gm45112	ENSMUSG00000109304	27.5033	22.0458	40.0355	49.314	78.7819	86.2123	84.507	33.0814	36.3145	64.8941	13.0176	24.8251	31.3226	31.667	20.2389	16.6853	26.7456	27.3761	17.1142	18.7711	7	120629761	120634886	-	TEC	Gm45112
ENSMUSG00000033872	14.1248	-0.944552	0.232454	-4.06339	4.84e-05	0.000516641	4	117145256	117148637	+	unitary_pseudogene	Best4-ps	ENSMUSG00000033872	15.0018	3.67431	17.3126	27.3967	16.8068	38.1324	27.8124	25.1419	23.345	23.4044	3.55024	15.9984	16.6401	6.88413	0	3.20872	7.37809	2.10585	2.44488	6.25704	4	117145256	117148637	+	unitary_pseudogene	Best4-ps
ENSMUSG00000117292	27.2326	-0.943705	0.217959	-4.32973	1.49e-05	0.000198584	17	73250985	73260656	+	lncRNA	E330032C10Rik	ENSMUSG00000117292	15.0018	7.34862	30.2971	60.2727	46.2187	68.804	53.4855	23.8186	42.7992	45.745	14.201	30.3417	16.6401	24.7829	10.5242	7.70092	10.1449	12.6351	10.5945	13.2962	17	73250985	73260656	+	lncRNA	E330032C10Rik
ENSMUSG00000109468	6.19577	-0.943048	0.232371	-4.05837	4.94e-05	0.000525863	7	99141592	99141996	+	TEC	Gm45185	ENSMUSG00000109468	7.50091	4.89908	12.9845	6.5752	8.4034	13.2634	12.8365	10.5861	9.07861	10.6384	2.36683	9.93002	3.91533	1.37683	3.23822	1.28349	1.84452	0	1.62992	1.56426	7	99141592	99141996	+	TEC	Gm45185
ENSMUSG00000117315	15.1175	-0.942792	0.199659	-4.72202	2.34e-06	4.43e-05	17	71144537	71181987	+	lncRNA	1600022D10Rik	ENSMUSG00000117315	13.7517	17.1468	14.0665	25.2049	27.3111	29.8427	18.1851	18.5256	18.1572	27.6598	14.201	5.51668	7.83065	13.7683	7.28599	7.70092	15.6784	8.4234	8.96456	3.12852	17	71144537	71181987	+	lncRNA	1600022D10Rik
ENSMUSG00000044083	23.0223	-0.941522	0.229782	-4.09745	4.18e-05	0.000455592	2	153779930	153844751	+	protein_coding	Efcab8	ENSMUSG00000044083	11.2514	2.44954	8.65632	42.7388	53.5717	54.7116	34.2307	47.6373	45.3931	46.8089	3.55024	20.4117	16.6401	9.63778	12.1433	5.13395	11.0671	9.47633	17.1142	7.8213	2	153779930	153844751	+	protein_coding	Efcab8
ENSMUSG00000114452	14.957	-0.941512	0.223051	-4.22105	2.43e-05	0.000294205	13	60483503	60488808	-	lncRNA	A530001N23Rik	ENSMUSG00000114452	27.5033	12.2477	10.8204	19.7256	29.4119	20.7241	47.0672	9.2628	19.4542	22.3406	11.8341	9.93002	11.746	9.63778	1.61911	1.28349	8.30035	6.31755	8.96456	10.9498	13	60483503	60488808	-	lncRNA	A530001N23Rik
ENSMUSG00000110735	56.5122	-0.940839	0.16747	-5.61794	1.93e-08	9.33e-07	9	123643165	123645489	+	TEC	Gm47173	ENSMUSG00000110735	42.5051	62.4632	41.1175	94.2445	73.5298	114.397	51.346	109.83	101.162	81.9155	28.4019	36.4101	46.9839	34.4206	39.6682	41.0716	21.212	43.1699	36.6732	29.721	9	123643165	123645489	+	TEC	Gm47173
ENSMUSG00000074398	11.5778	-0.94076	0.207744	-4.52847	5.94e-06	9.47e-05	3	96555764	96566801	-	lncRNA	Gm15441	ENSMUSG00000074398	7.50091	14.6972	15.1486	20.8215	19.9581	25.6979	10.6971	19.8489	9.07861	21.2768	4.73366	5.51668	6.85182	1.37683	8.9051	7.70092	9.22261	10.5293	6.51968	5.47491	3	96555764	96566801	-	lncRNA	Gm15441
ENSMUSG00000043085	142.081	-0.940375	0.198894	-4.72803	2.27e-06	4.34e-05	4	141613375	141618633	-	protein_coding	Tmem82	ENSMUSG00000043085	92.5112	79.61	102.794	208.215	340.338	408.679	229.988	194.519	158.227	179.789	65.0878	168.81	60.6876	101.885	99.5752	73.1588	95.9151	54.7521	67.6417	59.4419	4	141613375	141618633	-	protein_coding	Tmem82
ENSMUSG00000085022	10.4265	-0.94018	0.228163	-4.12065	3.78e-05	0.000420729	4	82065430	82102808	+	lncRNA	Gm5860	ENSMUSG00000085022	5.0006	14.6972	29.2151	17.5339	12.6051	9.11861	26.7427	5.29303	18.1572	18.0852	9.46732	7.17168	5.87299	0	2.42866	7.70092	1.84452	6.31755	8.1496	3.12852	4	82065430	82102808	+	lncRNA	Gm5860
ENSMUSG00000100084	62.6778	-0.939937	0.185073	-5.07874	3.8e-07	1.02e-05	15	99972157	99973287	-	lncRNA	2310068J16Rik	ENSMUSG00000100084	45.0054	36.7431	100.63	116.162	119.749	97.8178	111.25	67.4861	72.6289	96.8093	53.2537	42.4784	48.9416	59.2035	24.2866	16.0436	49.8021	30.5348	34.2283	30.5031	15	99972157	99973287	-	lncRNA	2310068J16Rik
ENSMUSG00000110125	21.2377	-0.939834	0.226645	-4.14673	3.37e-05	0.000385387	7	142591743	142620804	+	lncRNA	Gm33148	ENSMUSG00000110125	6.25075	12.2477	21.6408	17.5339	47.2691	66.3171	43.8581	23.8186	31.1267	45.745	16.5678	12.1367	7.83065	2.75365	17.8102	22.461	5.53356	6.31755	8.1496	9.38556	7	142591743	142620804	+	lncRNA	Gm33148
ENSMUSG00000030711	1748.68	-0.938668	0.15354	-6.11352	9.75e-10	8.27e-08	7	126672864	126676432	-	protein_coding	Sult1a1	ENSMUSG00000030711	1397.67	2531.6	2052.63	2578.57	1994.76	2442.96	2346.94	2225.72	3803.94	2319.17	589.34	1545.77	1453.56	1510.38	724.551	812.447	1515.27	806.541	1037.44	1284.26	7	126672864	126676432	-	protein_coding	Sult1a1
ENSMUSG00000040170	84.2883	-0.938186	0.182757	-5.13351	2.84e-07	8.12e-06	1	162874316	162898726	-	protein_coding	Fmo2	ENSMUSG00000040170	50.006	150.647	87.6453	130.408	59.8743	138.437	125.156	82.0419	199.73	140.427	31.9522	67.8551	41.1109	71.595	32.3822	45.5638	67.325	33.6936	60.307	69.6096	1	162874316	162898726	-	protein_coding	Fmo2
ENSMUSG00000045709	22.6477	-0.937415	0.195238	-4.80139	1.58e-06	3.22e-05	6	29985234	29993778	+	transcribed_unitary_pseudogene	Smkr-ps	ENSMUSG00000045709	30.0036	42.8669	22.7229	30.6843	32.5632	39.7903	33.161	13.2326	49.2839	23.4044	10.6507	20.9634	8.80948	13.7683	25.9058	11.5514	7.37809	10.5293	16.2992	9.38556	6	29985234	29993778	+	transcribed_unitary_pseudogene	Smkr-ps
ENSMUSG00000105852	103.34	-0.937256	0.198056	-4.73228	2.22e-06	4.27e-05	3	105959502	105984600	+	lncRNA	Gm42890	ENSMUSG00000105852	62.5075	44.0917	124.435	169.859	232.144	196.465	201.105	144.235	90.7861	180.852	26.0351	70.0618	78.3065	100.508	35.6204	47.489	51.6466	69.4931	87.2007	53.967	3	105959502	105984600	+	lncRNA	Gm42890
ENSMUSG00000085400	2.76889	-0.937042	0.218923	-4.28023	1.87e-05	0.00023703	1	62456724	62499261	-	lncRNA	Pard3bos3	ENSMUSG00000085400	2.5003	0	4.32816	2.19173	14.706	4.97378	4.27884	5.29303	9.07861	3.19151	0	1.10334	0.978832	2.75365	0	0	0	0	0	0	1	62456724	62499261	-	lncRNA	Pard3bos3
ENSMUSG00000086674	15.7163	-0.935315	0.205834	-4.54402	5.52e-06	8.9e-05	11	62761235	62765554	+	lncRNA	Zfp286os	ENSMUSG00000086674	8.75106	24.4954	15.1486	28.4925	19.9581	38.9613	28.8822	14.5558	19.4542	23.4044	4.73366	13.24	12.7248	8.26096	4.85733	4.49221	9.22261	11.5822	10.5945	12.5141	11	62761235	62765554	+	lncRNA	Zfp286os
ENSMUSG00000117270	15.0716	-0.935081	0.231198	-4.0445	5.24e-05	0.000551277	16	96097203	96114862	+	lncRNA	Gm49953	ENSMUSG00000117270	10.0012	2.44954	16.2306	26.3008	35.7145	38.9613	22.4639	30.4349	10.3756	36.1705	0	15.9984	11.746	11.0146	4.04777	7.05918	7.37809	6.31755	4.0748	4.69278	16	96097203	96114862	+	lncRNA	Gm49953
ENSMUSG00000046186	117.272	-0.934807	0.189969	-4.92083	8.62e-07	1.98e-05	9	78615545	78716253	+	protein_coding	Cd109	ENSMUSG00000046186	102.512	95.532	177.455	129.312	280.464	139.266	252.451	137.619	127.101	182.98	52.0702	66.2001	111.587	156.958	40.4777	39.7881	51.6466	63.1755	88.0157	50.8385	9	78615545	78716253	+	protein_coding	Cd109
ENSMUSG00000086127	8.71079	-0.934641	0.232177	-4.02555	5.68e-05	0.000588721	4	33303568	33310137	-	lncRNA	Gm11934	ENSMUSG00000086127	12.5015	2.44954	10.8204	19.7256	4.2017	14.9214	11.7668	10.5861	28.5328	18.0852	4.73366	4.41334	1.95766	2.75365	3.23822	0	9.22261	3.15878	4.88976	6.25704	4	33303568	33310137	-	lncRNA	Gm11934
ENSMUSG00000085024	79.3765	-0.934506	0.136096	-6.86653	6.58e-12	1.43e-09	13	23427974	23431022	-	lncRNA	C230035I16Rik	ENSMUSG00000085024	86.2604	57.5642	101.712	118.354	128.152	91.1861	155.108	101.891	110.24	114.895	52.0702	58.4768	52.8569	52.3194	38.8586	37.2211	64.5583	45.2758	60.307	60.224	13	23427974	23431022	-	lncRNA	C230035I16Rik
ENSMUSG00000039376	111.444	-0.932409	0.189117	-4.93032	8.21e-07	1.9e-05	14	20658945	20668354	-	protein_coding	Synpo2l	ENSMUSG00000039376	102.512	40.4174	85.4812	165.476	264.707	201.438	208.593	164.084	118.022	193.619	53.2537	94.3352	112.566	78.4791	45.3351	56.4734	56.2579	64.2284	58.6771	64.9168	14	20658945	20668354	-	protein_coding	Synpo2l
ENSMUSG00000056071	21.0257	-0.931609	0.225259	-4.13572	3.54e-05	0.000400003	3	90692631	90695721	-	protein_coding	S100a9	ENSMUSG00000056071	10.0012	58.7889	17.3126	41.6429	14.706	48.9089	29.9519	15.8791	1207.46	56.3834	7.10049	26.4801	11.746	13.7683	4.85733	10.2679	9.22261	4.2117	13.0394	9.38556	3	90692631	90695721	-	protein_coding	S100a9
ENSMUSG00000032369	57.2119	-0.929026	0.14455	-6.427	1.3e-10	1.69e-08	9	92249749	92272278	+	protein_coding	Plscr1	ENSMUSG00000032369	62.5075	63.688	81.153	85.4776	98.74	72.9488	75.9494	60.8698	102.459	65.958	36.6858	34.7551	19.5766	41.3048	51.0019	25.6697	31.3569	35.7995	52.9724	45.3636	9	92249749	92272278	+	protein_coding	Plscr1
ENSMUSG00000017697	124.621	-0.928802	0.180086	-5.15753	2.5e-07	7.28e-06	2	163726583	163750239	-	protein_coding	Ada	ENSMUSG00000017697	56.2568	116.353	96.3016	224.653	243.699	143.411	188.269	165.407	236.044	241.491	66.2712	89.9219	115.502	106.016	55.0497	72.517	67.325	68.4401	45.6377	93.8556	2	163726583	163750239	-	protein_coding	Ada
ENSMUSG00000025216	2.64915	-0.927362	0.224476	-4.13122	3.61e-05	0.000405816	19	45232683	45235812	-	protein_coding	Lbx1	ENSMUSG00000025216	5.0006	4.89908	2.16408	2.19173	4.2017	6.63171	2.13942	7.93954	2.59389	9.57454	0	1.10334	0	0	0	1.28349	0	0	3.25984	0	19	45232683	45235812	-	protein_coding	Lbx1
ENSMUSG00000112023	26.1755	-0.927289	0.229995	-4.03178	5.54e-05	0.000577239	10	51480631	51486703	+	protein_coding	Lilr4b	ENSMUSG00000112023	12.5015	17.1468	11.9024	24.1091	31.5128	63.8302	58.834	21.1721	119.319	32.979	14.201	8.27502	10.7671	11.0146	6.47644	10.2679	7.37809	12.6351	36.6732	12.5141	10	51480631	51486703	+	protein_coding	Lilr4b
ENSMUSG00000109674	108.249	-0.926742	0.158051	-5.86356	4.53e-09	2.85e-07	8	27228685	27240332	+	lncRNA	Gm45470	ENSMUSG00000109674	83.7601	74.7109	113.614	177.53	192.228	152.529	181.851	211.721	136.179	139.363	86.3893	69.5102	75.37	79.8559	64.7644	34.0124	81.1589	60.0167	83.9409	66.4811	8	27228685	27240332	+	lncRNA	Gm45470
ENSMUSG00000105006	34.3698	-0.926618	0.207686	-4.46162	8.13e-06	0.000122441	5	96996205	96997364	-	lncRNA	Gm9484	ENSMUSG00000105006	25.003	31.844	34.6253	72.3272	42.017	62.1723	72.7402	31.7582	23.345	89.3624	14.201	20.9634	25.4496	33.0438	33.1917	10.2679	14.7562	7.37048	17.9291	25.0282	5	96996205	96997364	-	lncRNA	Gm9484
ENSMUSG00000020798	78.6445	-0.924872	0.160586	-5.75937	8.44e-09	4.72e-07	11	72494918	72550506	-	protein_coding	Spns3	ENSMUSG00000020798	57.5069	79.61	76.8249	139.175	153.362	109.423	141.202	72.7791	112.834	122.341	39.0527	57.3735	49.9204	59.2035	28.3344	38.5046	58.1024	48.4346	54.6023	74.3024	11	72494918	72550506	-	protein_coding	Spns3
ENSMUSG00000028970	350.412	-0.92471	0.111794	-8.27157	1.32e-16	1.23e-13	5	8798146	8866315	+	protein_coding	Abcb1b	ENSMUSG00000028970	391.297	380.903	315.956	458.072	675.424	513.129	531.646	386.391	526.56	473.408	243.783	219.012	297.565	235.437	170.816	203.433	239.788	232.696	268.122	244.807	5	8798146	8866315	+	protein_coding	Abcb1b
ENSMUSG00000040966	47.4764	-0.924195	0.174096	-5.30852	1.11e-07	3.75e-06	17	12584131	12628488	+	protein_coding	Slc22a2	ENSMUSG00000040966	65.0078	75.9357	95.2196	35.0677	61.9751	51.3958	84.507	71.4559	62.2534	48.9366	21.3015	25.3767	29.3649	13.7683	26.7153	51.3395	20.2897	38.9582	26.0787	44.5814	17	12584131	12628488	+	protein_coding	Slc22a2
ENSMUSG00000049291	19.5145	-0.923045	0.217793	-4.23817	2.25e-05	0.000276247	11	59372668	59375657	-	protein_coding	Prss38	ENSMUSG00000049291	11.2514	8.57339	8.65632	30.6843	39.9162	36.4744	36.3701	25.1419	36.3145	46.8089	11.8341	9.93002	21.5343	11.0146	5.66688	7.05918	7.37809	9.47633	9.77952	16.4247	11	59372668	59375657	-	protein_coding	Prss38
ENSMUSG00000040380	47.8796	-0.922145	0.174478	-5.28516	1.26e-07	4.18e-06	14	55878912	55884392	-	protein_coding	Cbln3	ENSMUSG00000040380	26.2532	29.3945	80.071	76.7107	81.9332	98.6467	73.8099	52.9303	59.6595	72.341	30.7688	29.2384	31.3226	48.1889	23.4771	39.1464	25.8233	25.2702	24.4488	28.1567	14	55878912	55884392	-	protein_coding	Cbln3
ENSMUSG00000071714	128.991	-0.921684	0.219796	-4.19335	2.75e-05	0.000326496	15	78282506	78305721	-	protein_coding	Csf2rb2	ENSMUSG00000071714	110.013	417.646	120.106	117.258	168.068	117.713	101.622	96.5978	486.354	128.724	132.542	50.7534	68.5182	70.2181	92.2892	47.489	41.5017	74.7577	77.4212	60.224	15	78282506	78305721	-	protein_coding	Csf2rb2
ENSMUSG00000020419	7.32132	-0.921477	0.231126	-3.98691	6.69e-05	0.000670682	11	4345813	4441105	-	protein_coding	Hormad2	ENSMUSG00000020419	7.50091	9.79816	12.9845	15.3421	12.6051	6.63171	11.7668	7.93954	16.8603	8.5107	2.36683	3.86168	3.91533	11.0146	0	1.92523	3.68904	0	8.1496	1.56426	11	4345813	4441105	-	protein_coding	Hormad2
ENSMUSG00000116860	7.12442	-0.921392	0.229459	-4.01549	5.93e-05	0.000608604	17	8362106	8362445	-	processed_pseudogene	Gm46593	ENSMUSG00000116860	2.5003	0	6.49224	6.5752	25.2102	17.4082	18.1851	2.64651	18.1572	22.3406	2.36683	3.86168	2.93649	4.13048	0	1.28349	0.922261	4.2117	3.25984	0	17	8362106	8362445	-	processed_pseudogene	Gm46593
ENSMUSG00000020804	87.9046	-0.921091	0.131827	-6.98714	2.81e-12	7.11e-10	11	116586431	116597680	+	protein_coding	Aanat	ENSMUSG00000020804	97.5118	62.4632	127.681	109.587	132.354	125.174	175.432	112.477	103.756	128.724	48.52	73.3718	58.7299	52.3194	42.9064	53.9065	63.636	63.1755	69.2716	57.0955	11	116586431	116597680	+	protein_coding	Aanat
ENSMUSG00000101505	12.8095	-0.920468	0.224061	-4.1081	3.99e-05	0.000439456	14	61292979	61318146	-	lncRNA	1700109G14Rik	ENSMUSG00000101505	10.0012	11.0229	14.0665	36.1636	12.6051	26.5269	19.2548	13.2326	20.7511	22.3406	14.201	7.72335	6.85182	12.3914	0.809555	4.49221	0.922261	5.26463	8.96456	8.60343	14	61292979	61318146	-	lncRNA	1700109G14Rik
ENSMUSG00000112806	82.4127	-0.920394	0.175105	-5.25624	1.47e-07	4.79e-06	10	62781756	62783187	-	TEC	Gm48146	ENSMUSG00000112806	80.0097	93.0825	99.5477	121.641	113.446	79.5806	162.596	67.4861	186.76	122.341	43.7863	73.9235	62.6452	55.073	39.6682	23.7445	77.4699	29.4819	63.5669	52.4027	10	62781756	62783187	-	TEC	Gm48146
ENSMUSG00000108308	6.22162	-0.92006	0.228382	-4.0286	5.61e-05	0.000582723	6	91599231	91605514	+	lncRNA	Gm45218	ENSMUSG00000108308	5.0006	0	4.32816	8.76693	19.9581	20.7241	17.1153	7.93954	12.9694	8.5107	2.36683	2.20667	5.87299	2.75365	0	0	1.84452	0	4.0748	0	6	91599231	91605514	+	lncRNA	Gm45218
ENSMUSG00000064642	2.18264	-0.91968	0.215678	-4.26414	2.01e-05	0.00025021	8	121666627	121666706	-	snoRNA	Gm23299	ENSMUSG00000064642	2.5003	0	2.16408	5.47933	2.10085	7.46068	3.20913	6.61629	7.78167	3.19151	2.36683	0	0	0	0	0	0	0	0	0.78213	8	121666627	121666706	-	snoRNA	Gm23299
ENSMUSG00000112148	48.0404	-0.919609	0.225015	-4.08689	4.37e-05	0.000472286	10	51490955	51496611	+	protein_coding	Lilrb4a	ENSMUSG00000112148	30.0036	39.1926	40.0355	43.8347	55.6725	109.423	151.899	41.021	132.288	60.6388	18.9346	20.4117	36.2168	37.1743	11.3338	20.5358	12.9117	9.47633	74.1613	15.6426	10	51490955	51496611	+	protein_coding	Lilrb4a
ENSMUSG00000017897	220.385	-0.919368	0.130637	-7.03758	1.96e-12	5.21e-10	2	165595031	165771727	+	protein_coding	Eya2	ENSMUSG00000017897	236.279	232.706	515.051	223.557	279.413	312.519	351.934	255.389	267.171	269.151	163.311	167.155	120.396	133.552	165.149	193.807	103.293	152.674	136.913	128.269	2	165595031	165771727	+	protein_coding	Eya2
ENSMUSG00000047230	32.116	-0.918625	0.226979	-4.04719	5.18e-05	0.000547123	X	139800827	139811386	+	protein_coding	Cldn2	ENSMUSG00000047230	35.0042	29.3945	63.8404	8.76693	116.597	32.3296	79.1585	23.8186	54.4717	29.7875	16.5678	11.0334	11.746	38.5511	9.71466	25.6697	3.68904	16.8468	22.8189	12.5141	X	139800827	139811386	+	protein_coding	Cldn2
ENSMUSG00000100211	10.6863	-0.918286	0.232576	-3.94833	7.87e-05	0.000765101	12	99626052	99627974	-	lncRNA	1700064M15Rik	ENSMUSG00000100211	7.50091	4.89908	22.7229	37.2595	13.6555	3.31586	23.5336	13.2326	16.8603	21.2768	10.6507	9.93002	1.95766	0	4.04777	2.56697	6.45583	4.2117	6.51968	3.12852	12	99626052	99627974	-	lncRNA	1700064M15Rik
ENSMUSG00000031257	25.9737	-0.916326	0.21296	-4.30282	1.69e-05	0.000218212	X	134086420	134221956	-	protein_coding	Nox1	ENSMUSG00000031257	17.5021	8.57339	20.5588	48.2181	65.1264	58.0275	36.3701	44.9907	32.4236	38.2982	10.6507	27.5834	24.4708	11.0146	10.5242	8.98441	18.4452	10.5293	14.6693	12.5141	X	134086420	134221956	-	protein_coding	Nox1
ENSMUSG00000117575	10.9144	-0.915972	0.228368	-4.01095	6.05e-05	0.000618416	17	29430797	29437448	-	lncRNA	Gm36486	ENSMUSG00000117575	6.25075	14.6972	19.4767	13.1504	10.5043	26.5269	26.7427	18.5256	12.9694	12.7661	11.8341	4.96501	0.978832	5.5073	15.3815	1.92523	2.76678	2.10585	6.51968	4.69278	17	29430797	29437448	-	lncRNA	Gm36486
ENSMUSG00000035385	16.8336	-0.915554	0.221207	-4.13891	3.49e-05	0.00039566	11	82035570	82037453	+	protein_coding	Ccl2	ENSMUSG00000035385	10.0012	42.8669	15.1486	18.6297	30.4623	16.5793	17.1153	13.2326	59.6595	19.1491	11.8341	4.96501	11.746	16.5219	6.47644	3.85046	7.37809	6.31755	12.2244	12.5141	11	82035570	82037453	+	protein_coding	Ccl2
ENSMUSG00000022622	227.764	-0.912447	0.152747	-5.97359	2.32e-09	1.68e-07	15	89568325	89574585	+	protein_coding	Acr	ENSMUSG00000022622	166.27	127.376	233.721	358.348	367.649	389.613	328.401	418.149	391.677	281.917	128.992	126.884	164.444	176.234	143.291	139.9	110.671	141.092	196.405	164.247	15	89568325	89574585	+	protein_coding	Acr
ENSMUSG00000117131	3.19795	-0.912203	0.218545	-4.17398	2.99e-05	0.000350935	17	28528742	28530734	-	lncRNA	Gm41506	ENSMUSG00000117131	0	4.89908	4.32816	5.47933	7.35298	13.2634	6.41826	1.32326	3.89083	11.7022	0	2.75834	0.978832	0	0	0	0	0	0	1.56426	17	28528742	28530734	-	lncRNA	Gm41506
ENSMUSG00000024066	278.943	-0.911848	0.200128	-4.55632	5.21e-06	8.5e-05	17	73883894	73950196	-	protein_coding	Xdh	ENSMUSG00000024066	182.522	264.55	213.162	328.76	579.835	421.943	468.533	256.712	824.857	348.939	106.507	179.292	161.507	301.525	182.959	109.738	163.24	96.8691	180.921	206.482	17	73883894	73950196	-	protein_coding	Xdh
ENSMUSG00000114902	30.9612	-0.911827	0.219544	-4.15327	3.28e-05	0.000376908	14	61558797	61559661	+	processed_pseudogene	Gm4118	ENSMUSG00000114902	22.5027	19.5963	22.7229	81.0941	47.2691	61.3433	83.4373	39.6977	10.3756	57.4473	18.9346	24.2734	35.2379	12.3914	8.09555	11.5514	11.0671	21.0585	15.4842	15.6426	14	61558797	61559661	+	processed_pseudogene	Gm4118
ENSMUSG00000045506	25.8617	-0.911368	0.188841	-4.82611	1.39e-06	2.92e-05	17	63863299	63863791	-	protein_coding	A930002H24Rik	ENSMUSG00000045506	20.0024	29.3945	18.3947	44.9305	63.0255	45.593	49.2066	22.4954	27.2358	35.1067	14.201	16.55	18.5978	19.2756	9.71466	13.4766	12.9117	15.7939	16.2992	25.0282	17	63863299	63863791	-	protein_coding	A930002H24Rik
ENSMUSG00000106209	202.555	-0.910837	0.113369	-8.03423	9.42e-16	6.87e-13	5	121385521	121387101	+	lncRNA	Gm42918	ENSMUSG00000106209	197.524	192.289	207.752	307.939	301.472	324.954	309.146	300.379	239.935	302.13	134.909	161.639	115.502	129.422	107.671	115.514	153.095	122.139	174.401	153.298	5	121385521	121387101	+	lncRNA	Gm42918
ENSMUSG00000086245	54.571	-0.910163	0.138278	-6.58214	4.64e-11	7.04e-09	11	48843647	48853493	-	lncRNA	Gm16170	ENSMUSG00000086245	53.7565	63.688	48.6918	87.6693	94.5383	82.8964	88.7859	66.1629	53.1747	89.3624	35.5024	43.0301	44.0474	34.4206	25.0962	37.8629	36.8904	32.6407	30.9685	42.235	11	48843647	48853493	-	lncRNA	Gm16170
ENSMUSG00000000411	13.8507	-0.910033	0.196603	-4.62879	3.68e-06	6.38e-05	4	129489013	129491022	-	protein_coding	Tssk3	ENSMUSG00000000411	12.5015	18.3715	23.8049	8.76693	23.1094	17.4082	24.6033	26.4651	22.0481	14.8937	4.73366	7.17168	8.80948	13.7683	9.71466	7.05918	9.22261	5.26463	13.0394	6.25704	4	129489013	129491022	-	protein_coding	Tssk3
ENSMUSG00000109198	60.9365	-0.908537	0.222895	-4.07609	4.58e-05	0.000492332	7	44894304	44898099	-	TEC	D7Bwg0826e	ENSMUSG00000109198	35.0042	28.1697	33.5433	106.299	200.631	121.029	29.9519	127.033	116.725	87.2347	39.0527	57.3735	22.5131	19.2756	12.1433	59.0404	31.3569	40.0112	17.9291	34.4137	7	44894304	44898099	-	TEC	D7Bwg0826e
ENSMUSG00000026358	23.1248	-0.908275	0.231925	-3.91624	8.99e-05	0.000857091	1	144242295	144249242	-	protein_coding	Rgs1	ENSMUSG00000026358	27.5033	14.6972	19.4767	24.1091	29.4119	14.9214	17.1153	21.1721	147.852	34.0428	9.46732	7.72335	27.4073	16.5219	6.47644	3.85046	7.37809	6.31755	11.4094	15.6426	1	144242295	144249242	-	protein_coding	Rgs1
ENSMUSG00000108318	9.49332	-0.908167	0.225766	-4.02261	5.76e-05	0.000594886	7	79602005	79603676	-	TEC	Gm45170	ENSMUSG00000108318	3.75045	9.79816	10.8204	27.3967	23.1094	6.63171	19.2548	15.8791	10.3756	12.7661	4.73366	6.62001	5.87299	2.75365	1.61911	5.13395	1.84452	6.31755	8.1496	7.03917	7	79602005	79603676	-	TEC	Gm45170
ENSMUSG00000085287	160.666	-0.907471	0.124468	-7.29078	3.08e-13	1.12e-10	17	87274885	87282814	-	lncRNA	4833418N02Rik	ENSMUSG00000085287	133.766	150.647	207.752	216.982	257.354	246.202	295.24	186.579	166.009	270.215	102.957	106.472	138.994	119.784	87.4319	107.813	126.35	94.7633	100.24	97.7663	17	87274885	87282814	-	lncRNA	4833418N02Rik
ENSMUSG00000101905	24.7231	-0.906985	0.194732	-4.65761	3.2e-06	5.73e-05	1	156939837	156940196	+	lncRNA	4930439D14Rik	ENSMUSG00000101905	17.5021	15.922	22.7229	49.314	39.9162	52.2247	37.4398	29.1117	28.5328	48.9366	14.201	19.86	7.83065	19.2756	15.3815	10.9096	12.9117	16.8468	10.5945	25.0282	1	156939837	156940196	+	lncRNA	4930439D14Rik
ENSMUSG00000108220	15.1744	-0.906224	0.190883	-4.74753	2.06e-06	4e-05	6	128165495	128166922	-	TEC	Gm44056	ENSMUSG00000108220	23.7529	19.5963	17.3126	15.3421	16.8068	14.9214	28.8822	18.5256	33.7206	21.2768	11.8341	7.72335	5.87299	5.5073	9.71466	8.98441	16.6007	6.31755	11.4094	9.38556	6	128165495	128166922	-	TEC	Gm44056
ENSMUSG00000090576	89.6312	-0.906151	0.15116	-5.99464	2.04e-09	1.5e-07	6	108656916	108659537	+	lncRNA	Gm17055	ENSMUSG00000090576	66.258	67.3623	142.829	129.312	128.152	168.28	140.132	107.184	121.913	127.661	86.3893	59.5801	73.4124	57.8267	58.2879	40.4298	55.3356	68.4401	57.8621	35.978	6	108656916	108659537	+	lncRNA	Gm17055
ENSMUSG00000086425	57.0765	-0.906144	0.165845	-5.46379	4.66e-08	1.9e-06	2	28095476	28127731	+	lncRNA	F730016J06Rik	ENSMUSG00000086425	45.0054	33.0688	89.8094	93.1487	125.001	87.0412	108.041	62.1931	66.1442	61.7026	28.4019	36.4101	36.2168	45.4353	32.3822	41.0716	29.5123	36.8524	48.8976	35.1959	2	28095476	28127731	+	lncRNA	F730016J06Rik
ENSMUSG00000097888	34.2321	-0.905346	0.186278	-4.86019	1.17e-06	2.55e-05	18	5162838	5165731	-	lncRNA	Gm26682	ENSMUSG00000097888	18.7523	28.1697	53.02	59.1768	57.7734	53.0537	69.5311	43.6675	31.1267	56.3834	15.3844	29.7901	23.492	13.7683	27.5249	20.5358	18.4452	26.3231	29.3386	9.38556	18	5162838	5165731	-	lncRNA	Gm26682
ENSMUSG00000097662	14.236	-0.904668	0.22297	-4.05735	4.96e-05	0.000527054	15	3996038	4015858	+	lncRNA	Gm2093	ENSMUSG00000097662	15.0018	12.2477	12.9845	35.0677	25.2102	16.5793	26.7427	18.5256	19.4542	25.5321	5.91707	17.1017	5.87299	2.75365	1.61911	5.13395	7.37809	18.9527	3.25984	9.38556	15	3996038	4015858	+	lncRNA	Gm2093
ENSMUSG00000109015	126.89	-0.90413	0.14971	-6.03922	1.55e-09	1.2e-07	7	28167274	28169627	-	TEC	Gm31024	ENSMUSG00000109015	130.016	74.7109	130.927	201.639	218.488	225.478	231.057	136.295	169.9	181.916	63.9044	108.679	101.798	86.74	99.5752	71.2335	95.9151	74.7577	64.3818	70.3917	7	28167274	28169627	-	TEC	Gm31024
ENSMUSG00000029287	625.799	-0.904053	0.0997507	-9.06312	1.27e-19	3.24e-16	5	107106569	107289629	-	protein_coding	Tgfbr3	ENSMUSG00000029287	562.568	658.926	907.832	714.505	923.324	895.281	901.765	815.126	1127.05	741.495	476.916	412.648	354.337	355.221	392.634	464.622	403.95	440.123	450.673	516.988	5	107106569	107289629	-	protein_coding	Tgfbr3
ENSMUSG00000097462	81.3904	-0.903773	0.175124	-5.16076	2.46e-07	7.19e-06	6	92940328	93272979	+	lncRNA	9530026P05Rik	ENSMUSG00000097462	56.2568	78.3852	96.3016	89.8611	184.875	145.898	105.901	100.568	141.367	106.384	36.6858	48.5468	49.9204	66.0876	17.0006	47.489	56.2579	65.2814	63.5669	71.1739	6	92940328	93272979	+	lncRNA	9530026P05Rik
ENSMUSG00000020698	26.4634	-0.903721	0.2103	-4.29729	1.73e-05	0.000222171	11	82719249	82764321	-	protein_coding	Cct6b	ENSMUSG00000020698	18.7523	7.34862	30.2971	46.0264	43.0674	48.9089	45.9975	55.5768	47.987	28.7236	17.7512	14.3434	25.4496	17.8987	12.9529	9.62615	27.6678	6.31755	8.1496	16.4247	11	82719249	82764321	-	protein_coding	Cct6b
ENSMUSG00000099757	24.0762	-0.901989	0.227211	-3.96983	7.19e-05	0.000712657	19	11470165	11484578	-	lncRNA	BE692007	ENSMUSG00000099757	10.0012	51.4403	12.9845	27.3967	34.664	35.6455	20.3245	31.7582	93.38	36.1705	15.3844	4.41334	14.6825	20.6524	20.2389	19.8941	1.84452	11.5822	7.33464	11.732	19	11470165	11484578	-	lncRNA	BE692007
ENSMUSG00000097702	6.29346	-0.901149	0.232539	-3.87526	0.00010651	0.000982899	8	120598551	120599277	+	lncRNA	Gm26739	ENSMUSG00000097702	8.75106	4.89908	2.16408	13.1504	12.6051	11.6055	10.6971	6.61629	9.07861	15.9576	3.55024	0	0.978832	1.37683	4.85733	2.56697	5.53356	4.2117	5.70472	1.56426	8	120598551	120599277	+	lncRNA	Gm26739
ENSMUSG00000033182	46.308	-0.899936	0.196555	-4.57855	4.68e-06	7.79e-05	6	88545113	88637950	-	protein_coding	Kbtbd12	ENSMUSG00000033182	75.0091	53.8899	35.7073	54.7933	69.3281	56.3696	80.2282	60.8698	67.4411	86.1709	18.9346	31.4451	41.1109	38.5511	14.572	8.34267	44.2685	35.7995	42.3779	10.9498	6	88545113	88637950	-	protein_coding	Kbtbd12
ENSMUSG00000087600	6.58657	-0.899755	0.233523	-3.85296	0.000116698	0.00105781	2	173276697	173278428	+	lncRNA	Pmepa1os	ENSMUSG00000087600	12.5015	2.44954	10.8204	4.38347	14.706	21.5531	4.27884	15.8791	7.78167	8.5107	4.73366	1.655	0	2.75365	3.23822	5.13395	0.922261	0	6.51968	3.91065	2	173276697	173278428	+	lncRNA	Pmepa1os
ENSMUSG00000045942	26.6235	-0.899652	0.208946	-4.30566	1.66e-05	0.000216198	11	51253650	51263046	-	protein_coding	BC049762	ENSMUSG00000045942	27.5033	12.2477	37.8714	40.5471	43.0674	24.04	40.649	41.021	44.0961	63.8303	3.55024	25.9284	20.5555	27.5365	9.71466	8.98441	12.9117	8.4234	22.0039	17.989	11	51253650	51263046	-	protein_coding	BC049762
ENSMUSG00000004328	1691.53	-0.898874	0.175308	-5.12741	2.94e-07	8.33e-06	7	17031506	17062427	-	protein_coding	Hif3a	ENSMUSG00000004328	1173.89	1262.74	1464	2773.64	3058.84	2508.45	3061.51	2393.77	2763.79	2520.23	670.996	1308.56	1211.79	1460.81	1181.95	1090.96	1067.98	773.9	598.995	1483.7	7	17031506	17062427	-	protein_coding	Hif3a
ENSMUSG00000117907	1.87311	-0.898707	0.211333	-4.25256	2.11e-05	0.000261162	18	66036826	66038283	+	lncRNA	Gm50142	ENSMUSG00000117907	5.0006	0	2.16408	2.19173	4.2017	6.63171	4.27884	1.32326	7.78167	2.12768	0	0	0.978832	0	0	0	0	0	0	0.78213	18	66036826	66038283	+	lncRNA	Gm50142
ENSMUSG00000107300	201.011	-0.898668	0.215673	-4.16681	3.09e-05	0.000359269	5	66688881	66691393	+	TEC	Gm43279	ENSMUSG00000107300	135.016	127.376	147.158	225.749	443.28	284.335	216.081	341.4	714.617	224.47	101.774	120.264	142.909	159.712	40.4777	59.6822	120.816	154.78	132.838	127.487	5	66688881	66691393	+	TEC	Gm43279
ENSMUSG00000117698	236.05	-0.898385	0.139496	-6.44021	1.19e-10	1.57e-08	19	43675177	43677176	+	lncRNA	BC037704	ENSMUSG00000117698	201.274	173.917	330.022	344.102	471.641	406.192	320.913	252.742	254.201	389.365	166.861	189.774	193.809	130.798	143.291	127.065	130.039	147.41	202.11	145.476	19	43675177	43677176	+	lncRNA	BC037704
ENSMUSG00000056054	17.7171	-0.897826	0.231351	-3.8808	0.000104115	0.000965446	3	90668977	90670035	+	protein_coding	S100a8	ENSMUSG00000056054	16.252	48.9908	19.4767	50.4099	8.4034	66.3171	10.6971	2.64651	1149.09	29.7875	7.10049	14.3434	3.91533	13.7683	8.09555	7.70092	7.37809	8.4234	11.4094	6.25704	3	90668977	90670035	+	protein_coding	S100a8
ENSMUSG00000037406	52.7436	-0.897695	0.192039	-4.67455	2.95e-06	5.38e-05	8	25024928	25038962	-	protein_coding	Htra4	ENSMUSG00000037406	32.5039	48.9908	50.8559	78.9024	81.9332	72.9488	70.6008	79.3954	121.913	88.2986	31.9522	42.4784	69.497	27.5365	21.0484	13.4766	36.8904	20.0056	37.4882	28.1567	8	25024928	25038962	-	protein_coding	Htra4
ENSMUSG00000035493	223.612	-0.896998	0.134912	-6.64875	2.96e-11	4.82e-09	13	56609522	56639562	+	protein_coding	Tgfbi	ENSMUSG00000035493	211.276	291.495	279.166	236.707	280.464	268.584	375.468	246.126	562.874	221.278	186.979	148.95	162.486	150.074	120.624	176.479	123.583	140.039	140.988	148.605	13	56609522	56639562	+	protein_coding	Tgfbi
ENSMUSG00000111246	99.7243	-0.896506	0.162594	-5.51379	3.51e-08	1.52e-06	9	31278020	31280992	-	lncRNA	4930517E14Rik	ENSMUSG00000111246	81.2598	55.1146	121.189	200.544	204.833	169.109	155.108	116.447	116.725	121.278	57.9873	80.5435	69.497	86.74	55.8593	57.7569	66.4028	52.6463	46.4527	78.9952	9	31278020	31280992	-	lncRNA	4930517E14Rik
ENSMUSG00000083496	27.7906	-0.896257	0.206089	-4.34888	1.37e-05	0.000185306	4	79327707	79328456	+	processed_pseudogene	Gm11263	ENSMUSG00000083496	33.7541	52.6651	47.6098	47.1223	31.5128	43.1061	36.3701	39.6977	41.5022	17.0214	33.1356	26.4801	8.80948	11.0146	12.9529	28.2367	5.53356	8.4234	8.96456	21.8996	4	79327707	79328456	+	processed_pseudogene	Gm11263
ENSMUSG00000100876	93.4555	-0.895568	0.114055	-7.85205	4.09e-15	2.32e-12	6	134897960	134901108	+	lncRNA	2810454H06Rik	ENSMUSG00000100876	87.5106	91.8577	100.63	138.079	138.656	145.898	151.899	109.83	121.913	144.682	59.1707	58.4768	80.2642	71.595	55.0497	64.8161	58.1024	52.6463	67.6417	70.3917	6	134897960	134901108	+	lncRNA	2810454H06Rik
ENSMUSG00000006522	3200.22	-0.895358	0.13525	-6.62003	3.59e-11	5.67e-09	14	30908571	30923760	-	protein_coding	Itih3	ENSMUSG00000006522	3782.96	3338.72	4032.76	3379.65	5217.46	3420.31	5700.48	2778.84	5658.57	5225.57	1521.87	2577.94	2222.93	2931.26	1704.11	1384.88	2301.04	1869.99	2197.95	2757.01	14	30908571	30923760	-	protein_coding	Itih3
ENSMUSG00000110489	1.95611	-0.895176	0.214569	-4.17198	3.02e-05	0.000352681	8	95808551	95818274	-	lncRNA	Gm31659	ENSMUSG00000110489	1.25015	3.67431	3.24612	5.47933	3.15128	5.80275	7.48797	5.29303	0	1.06384	0	0	0.978832	0	0	0.641744	0	1.05293	0	0	8	95808551	95818274	-	lncRNA	Gm31659
ENSMUSG00000020395	58.9491	-0.895128	0.151645	-5.90277	3.57e-09	2.33e-07	11	46325149	46389515	-	protein_coding	Itk	ENSMUSG00000020395	82.51	53.8899	81.153	76.7107	75.6306	111.91	89.8556	76.7489	70.035	71.2771	30.7688	45.7884	21.5343	37.1743	24.2866	40.4298	29.5123	54.7521	44.0078	61.0062	11	46325149	46389515	-	protein_coding	Itk
ENSMUSG00000082806	41.7083	-0.894612	0.215986	-4.142	3.44e-05	0.000391007	11	85111125	85111793	-	processed_pseudogene	Rpl13-ps1	ENSMUSG00000082806	31.2538	11.0229	51.9379	43.8347	108.194	97.8178	66.322	75.4257	29.8297	77.6602	22.4849	35.8584	39.1533	6.88413	13.7624	16.6853	26.7456	33.6936	25.2638	20.3354	11	85111125	85111793	-	processed_pseudogene	Rpl13-ps1
ENSMUSG00000050675	89.8603	-0.894332	0.154961	-5.77133	7.86e-09	4.46e-07	11	70639121	70642036	+	protein_coding	Gp1ba	ENSMUSG00000050675	76.2592	58.7889	76.8249	159.997	132.354	184.859	160.456	137.619	108.943	108.511	49.7034	69.5102	64.6029	53.6962	64.7644	51.9812	59.0247	53.6992	50.5275	75.0845	11	70639121	70642036	+	protein_coding	Gp1ba
ENSMUSG00000015340	106.628	-0.894149	0.172353	-5.1879	2.13e-07	6.47e-06	X	9435251	9487771	-	protein_coding	Cybb	ENSMUSG00000015340	107.513	117.578	100.63	121.641	98.74	168.28	201.105	119.093	278.843	129.788	47.3366	60.1318	80.2642	77.1023	46.9542	46.8473	48.8798	98.975	112.464	70.3917	X	9435251	9487771	-	protein_coding	Cybb
ENSMUSG00000118433	5.1417	-0.894034	0.225036	-3.97286	7.1e-05	0.000705021	4	42273496	42275109	+	unprocessed_pseudogene	Gm50471	ENSMUSG00000118433	6.25075	4.89908	5.4102	8.76693	4.2017	11.6055	10.6971	10.5861	0	25.5321	1.18341	1.10334	1.95766	8.26096	0	0	0	0	0.81496	1.56426	4	42273496	42275109	+	unprocessed_pseudogene	Gm50471
ENSMUSG00000040026	6.42744	-0.893581	0.228955	-3.90286	9.51e-05	0.000898195	7	46711997	46715700	-	protein_coding	Saa3	ENSMUSG00000040026	2.5003	26.9449	7.57428	15.3421	7.35298	35.6455	2.13942	2.64651	870.25	4.25535	1.18341	1.655	1.95766	5.5073	1.61911	0	2.76678	2.10585	1.62992	3.12852	7	46711997	46715700	-	protein_coding	Saa3
ENSMUSG00000100490	42.6473	-0.893241	0.163839	-5.45194	4.98e-08	1.98e-06	7	39489437	39498801	+	unprocessed_pseudogene	Gm28455	ENSMUSG00000100490	33.7541	53.8899	54.102	46.0264	102.942	69.633	67.3917	50.2838	51.8778	43.6174	21.3015	27.0317	34.2591	28.9133	23.4771	19.8941	36.8904	18.9527	35.8582	32.8495	7	39489437	39498801	+	unprocessed_pseudogene	Gm28455
ENSMUSG00000033644	250.84	-0.892781	0.141388	-6.31441	2.71e-10	3.06e-08	14	70372476	70429383	-	protein_coding	Piwil2	ENSMUSG00000033644	225.027	180.041	216.408	467.935	371.851	386.297	391.514	414.18	338.503	347.875	123.075	195.29	175.211	177.611	136.005	116.156	214.887	176.891	172.771	189.276	14	70372476	70429383	-	protein_coding	Piwil2
ENSMUSG00000116164	71.0636	-0.892498	0.161761	-5.51737	3.44e-08	1.5e-06	15	100613172	100613843	-	lncRNA	1110013H19Rik	ENSMUSG00000116164	62.5075	64.9128	77.9069	135.887	133.404	98.6467	118.738	84.6885	62.2534	115.958	49.7034	65.0968	54.8146	44.0584	23.4771	38.5046	43.3463	52.6463	60.307	34.4137	15	100613172	100613843	-	lncRNA	1110013H19Rik
ENSMUSG00000069540	32.6079	-0.891702	0.174053	-5.12315	3e-07	8.45e-06	10	88729540	88731101	-	transcribed_processed_pseudogene	Gm4925	ENSMUSG00000069540	47.5057	20.8211	31.3792	58.0809	73.5298	49.7378	57.7643	41.021	33.7206	26.596	23.6683	21.515	25.4496	24.7829	18.6198	16.6853	26.7456	17.8997	16.2992	20.3354	10	88729540	88731101	-	transcribed_processed_pseudogene	Gm4925
ENSMUSG00000073489	42.0441	-0.89152	0.221831	-4.01891	5.85e-05	0.000601868	1	173747292	173766943	-	protein_coding	Ifi204	ENSMUSG00000073489	25.003	46.5412	17.3126	81.0941	108.194	63.8302	24.6033	75.4257	123.21	40.4258	18.9346	17.6534	16.6401	24.7829	11.3338	16.6853	13.8339	34.7465	21.189	59.4419	1	173747292	173766943	-	protein_coding	Ifi204
ENSMUSG00000024134	71.7132	-0.889963	0.1593	-5.5867	2.31e-08	1.09e-06	17	85684276	85688274	-	protein_coding	Six2	ENSMUSG00000024134	117.514	117.578	95.2196	76.7107	86.1349	90.3571	124.086	86.0117	83.0045	89.3624	35.5024	54.0635	32.3014	27.5365	74.479	66.7413	20.2897	63.1755	47.2677	46.9278	17	85684276	85688274	-	protein_coding	Six2
ENSMUSG00000046352	512.574	-0.887052	0.116066	-7.64268	2.13e-14	1.07e-11	14	57098599	57104702	-	protein_coding	Gjb2	ENSMUSG00000046352	771.343	792.426	925.145	438.347	535.717	668.145	809.77	530.626	677.005	605.324	368.042	323.829	391.533	392.395	387.777	376.703	217.654	321.142	383.031	335.534	14	57098599	57104702	-	protein_coding	Gjb2
ENSMUSG00000022952	167.908	-0.885618	0.143645	-6.16532	7.03e-10	6.47e-08	16	92601465	92826149	-	protein_coding	Runx1	ENSMUSG00000022952	173.771	290.27	149.322	177.53	227.942	236.255	203.245	156.144	425.398	194.682	101.774	110.885	93.9678	132.175	119.005	128.99	121.738	102.134	82.3109	130.616	16	92601465	92826149	-	protein_coding	Runx1
ENSMUSG00000087433	25.4024	-0.885505	0.167704	-5.28016	1.29e-07	4.28e-06	2	151540730	151542348	-	lncRNA	Gm14167	ENSMUSG00000087433	25.003	19.5963	35.7073	35.0677	43.0674	26.5269	36.3701	41.021	40.2053	37.2343	18.9346	10.4817	11.746	22.0292	15.3815	10.2679	20.2897	20.0056	19.559	19.5533	2	151540730	151542348	-	lncRNA	Gm14167
ENSMUSG00000049709	31.2482	-0.884577	0.200962	-4.40172	1.07e-05	0.000152207	7	108921851	108930178	-	protein_coding	Nlrp10	ENSMUSG00000049709	25.003	31.844	75.7428	28.4925	35.7145	43.9351	60.9734	26.4651	36.3145	67.0218	35.5024	20.9634	23.492	15.1451	4.85733	12.8349	25.8233	18.9527	17.1142	18.7711	7	108921851	108930178	-	protein_coding	Nlrp10
ENSMUSG00000061728	5.06425	-0.883944	0.23354	-3.78498	0.000153719	0.0013278	17	34532876	34547651	-	unprocessed_pseudogene	Btnl7-ps	ENSMUSG00000061728	0	4.89908	4.32816	15.3421	7.35298	12.4345	8.55767	10.5861	3.89083	11.7022	0	1.655	4.89416	0	3.23822	1.92523	2.76678	2.10585	3.25984	2.34639	17	34532876	34547651	-	unprocessed_pseudogene	Btnl7-ps
ENSMUSG00000028784	130.884	-0.883316	0.214237	-4.12309	3.74e-05	0.000417217	4	129929248	129957115	+	protein_coding	Spocd1	ENSMUSG00000028784	95.0115	72.2614	66.0045	299.172	297.27	185.688	195.757	211.721	274.952	151.065	26.0351	60.1318	120.396	108.769	78.5268	109.738	43.3463	73.7048	66.0117	82.1237	4	129929248	129957115	+	protein_coding	Spocd1
ENSMUSG00000018924	7.072	-0.883207	0.232743	-3.79478	0.000147775	0.00128661	11	70344151	70352031	-	protein_coding	Alox15	ENSMUSG00000018924	7.50091	7.34862	12.9845	9.8628	18.9077	25.6979	6.41826	9.2628	7.78167	7.44687	7.10049	2.75834	1.95766	0	0	6.41744	1.84452	0	8.1496	0	11	70344151	70352031	-	protein_coding	Alox15
ENSMUSG00000012428	38.0538	-0.882817	0.228326	-3.86648	0.000110417	0.00101376	5	7960456	7982213	+	protein_coding	Steap4	ENSMUSG00000012428	20.0024	51.4403	15.1486	98.628	119.749	79.5806	42.7884	55.5768	99.8648	54.2557	11.8341	19.86	15.6613	13.7683	0	29.5202	1.84452	0	26.0787	5.47491	5	7960456	7982213	+	protein_coding	Steap4
ENSMUSG00000087597	14.2254	-0.881583	0.23274	-3.78784	0.000151961	0.00131669	18	56769716	56801688	+	lncRNA	Gm15345	ENSMUSG00000087597	17.5021	6.12385	19.4767	31.7801	26.2606	26.5269	39.5792	25.1419	9.07861	12.7661	14.201	9.93002	9.78832	16.5219	2.42866	0	7.37809	5.26463	1.62992	3.12852	18	56769716	56801688	+	lncRNA	Gm15345
ENSMUSG00000073752	221.308	-0.880847	0.15927	-5.53052	3.19e-08	1.42e-06	4	130306555	130308674	-	lncRNA	Gm10570	ENSMUSG00000073752	175.021	140.848	189.357	435.059	390.758	396.245	331.61	236.863	302.188	362.769	130.176	134.607	190.872	166.596	159.482	99.4703	156.784	108.451	191.516	127.487	4	130306555	130308674	-	lncRNA	Gm10570
ENSMUSG00000031936	5.40771	-0.880596	0.223703	-3.93645	8.27e-05	0.000797223	9	15051840	15112108	-	protein_coding	Hephl1	ENSMUSG00000031936	1.25015	4.89908	17.3126	10.9587	4.2017	14.0924	18.1851	9.2628	10.3756	3.19151	0	4.41334	0	5.5073	0	0	3.68904	0	0.81496	0	9	15051840	15112108	-	protein_coding	Hephl1
ENSMUSG00000038521	154.068	-0.880561	0.155807	-5.65161	1.59e-08	7.96e-07	6	124530344	124542359	-	protein_coding	C1s1	ENSMUSG00000038521	227.527	181.266	128.763	231.228	120.799	258.637	143.341	259.358	330.721	178.725	101.774	108.127	91.0313	63.334	101.194	95.6198	71.9363	164.256	117.354	106.37	6	124530344	124542359	-	protein_coding	C1s1
ENSMUSG00000113303	97.4236	-0.880484	0.174412	-5.0483	4.46e-07	1.16e-05	12	81781357	81783031	+	lncRNA	4930423D22Rik	ENSMUSG00000113303	115.014	71.0366	107.122	159.997	147.06	108.594	144.411	145.558	108.943	205.321	49.7034	65.6485	75.37	108.769	30.7631	30.1619	75.6254	78.9694	76.6062	43.7993	12	81781357	81783031	+	lncRNA	4930423D22Rik
ENSMUSG00000085010	11.6718	-0.880358	0.232361	-3.78876	0.000151403	0.0013126	2	155592318	155594955	+	lncRNA	Gssos1	ENSMUSG00000085010	6.25075	15.922	20.5588	15.3421	3.15128	50.5668	19.2548	5.29303	24.642	13.8299	8.2839	2.75834	4.89416	8.26096	7.28599	3.20872	3.68904	10.5293	8.1496	1.56426	2	155592318	155594955	+	lncRNA	Gssos1
ENSMUSG00000074037	48.9586	-0.879711	0.218775	-4.02108	5.79e-05	0.00059759	8	123407106	123410744	+	protein_coding	Mc1r	ENSMUSG00000074037	57.5069	37.9679	104.958	85.4776	71.4289	58.8565	117.668	41.021	32.4236	89.3624	11.8341	38.0651	43.0686	42.6816	11.3338	4.49221	31.3569	20.0056	55.4173	24.246	8	123407106	123410744	+	protein_coding	Mc1r
ENSMUSG00000073795	25.3239	-0.879596	0.176207	-4.99184	5.98e-07	1.48e-05	7	139972302	139978755	-	protein_coding	Spef1l	ENSMUSG00000073795	16.252	20.8211	36.7894	37.2595	31.5128	45.593	48.1369	31.7582	41.5022	32.979	17.7512	24.2734	18.5978	12.3914	9.71466	11.5514	15.6784	17.8997	20.374	15.6426	7	139972302	139978755	-	protein_coding	Spef1l
ENSMUSG00000101986	11.3411	-0.879592	0.232768	-3.77884	0.000157559	0.00135371	1	81554156	81557483	-	processed_pseudogene	Gm6198	ENSMUSG00000101986	17.5021	2.44954	12.9845	6.5752	14.706	33.9875	19.2548	13.2326	29.8297	21.2768	7.10049	2.20667	3.91533	0	5.66688	8.34267	7.37809	14.741	4.88976	0.78213	1	81554156	81557483	-	processed_pseudogene	Gm6198
ENSMUSG00000050035	62.802	-0.879093	0.165049	-5.32624	1e-07	3.48e-06	10	85096286	85102495	-	protein_coding	Fhl4	ENSMUSG00000050035	68.7583	46.5412	83.3171	83.2859	116.597	111.081	127.295	76.7489	41.5022	88.2986	44.9697	45.7884	50.8992	26.1597	32.3822	40.4298	47.9576	25.2702	44.0078	54.7491	10	85096286	85102495	-	protein_coding	Fhl4
ENSMUSG00000044951	43.9907	-0.879013	0.21079	-4.1701	3.04e-05	0.000354928	13	32700826	32783954	-	protein_coding	Mylk4	ENSMUSG00000044951	27.5033	7.34862	46.5277	73.4231	115.547	106.936	68.4614	29.1117	67.4411	73.4048	28.4019	27.5834	27.4073	27.5365	27.5249	21.1775	20.2897	37.9053	22.8189	23.4639	13	32700826	32783954	-	protein_coding	Mylk4
ENSMUSG00000097115	16.4022	-0.878977	0.212987	-4.1269	3.68e-05	0.000411706	7	12948591	12961768	-	lncRNA	1810019N24Rik	ENSMUSG00000097115	20.0024	24.4954	15.1486	32.876	28.3615	21.5531	32.0913	13.2326	11.6725	29.7875	2.36683	7.72335	8.80948	19.2756	11.3338	3.85046	20.2897	11.5822	7.33464	6.25704	7	12948591	12961768	-	lncRNA	1810019N24Rik
ENSMUSG00000116919	39.8593	-0.878871	0.157398	-5.58376	2.35e-08	1.1e-06	16	55883071	55884491	-	processed_pseudogene	Gm17809	ENSMUSG00000116919	61.2574	29.3945	42.1996	82.19	64.076	43.9351	38.5095	70.1326	53.1747	46.8089	28.4019	27.0317	20.5555	33.0438	20.2389	19.8941	33.2014	30.5348	24.4488	28.1567	16	55883071	55884491	-	processed_pseudogene	Gm17809
ENSMUSG00000021213	12.2102	-0.877829	0.207647	-4.2275	2.36e-05	0.000287496	13	4191149	4205596	+	protein_coding	Akr1c13	ENSMUSG00000021213	17.5021	17.1468	17.3126	13.1504	12.6051	23.211	24.6033	10.5861	12.9694	21.2768	7.10049	9.93002	1.95766	8.26096	14.572	3.85046	7.37809	6.31755	9.77952	4.69278	13	4191149	4205596	+	protein_coding	Akr1c13
ENSMUSG00000065952	9.85575	-0.877068	0.231737	-3.78475	0.000153862	0.00132865	8	3567989	3584939	+	protein_coding	C330021F23Rik	ENSMUSG00000065952	3.75045	12.2477	10.8204	6.5752	23.1094	27.3558	24.6033	10.5861	14.2664	13.8299	8.2839	2.20667	0.978832	4.13048	6.47644	6.41744	8.30035	4.2117	8.96456	0	8	3567989	3584939	+	protein_coding	C330021F23Rik
ENSMUSG00000071713	233.591	-0.877059	0.215717	-4.06578	4.79e-05	0.000511734	15	78325751	78353847	+	protein_coding	Csf2rb	ENSMUSG00000071713	167.52	581.765	183.947	195.064	237.396	282.677	211.802	198.489	1019.4	225.534	197.63	113.644	153.677	107.392	157.863	136.691	100.526	96.8691	147.508	156.426	15	78325751	78353847	+	protein_coding	Csf2rb
ENSMUSG00000082932	13.6935	-0.876687	0.21529	-4.07212	4.66e-05	0.000499387	4	96444595	96507386	-	protein_coding	Cyp2j8	ENSMUSG00000082932	8.75106	12.2477	9.73836	26.3008	42.017	14.9214	10.6971	22.4954	27.2358	19.1491	9.46732	10.4817	9.78832	5.5073	6.47644	3.85046	11.0671	8.4234	9.77952	5.47491	4	96444595	96507386	-	protein_coding	Cyp2j8
ENSMUSG00000047040	26.4271	-0.874388	0.198478	-4.40547	1.06e-05	0.000150251	11	96928103	96937830	+	protein_coding	Prr15l	ENSMUSG00000047040	22.5027	20.8211	27.051	23.0132	54.6221	60.5144	38.5095	30.4349	35.0175	51.0642	11.8341	22.0667	32.3014	15.1451	9.71466	19.2523	14.7562	20.0056	8.96456	10.9498	11	96928103	96937830	+	protein_coding	Prr15l
ENSMUSG00000086822	269.735	-0.874203	0.172233	-5.0757	3.86e-07	1.03e-05	2	131820005	131847683	-	lncRNA	5330413P13Rik	ENSMUSG00000086822	245.03	184.94	396.027	318.897	384.456	361.428	607.595	330.814	346.284	456.387	157.394	286.316	258.412	205.147	80.1459	94.9781	165.085	177.944	202.11	135.309	2	131820005	131847683	-	lncRNA	5330413P13Rik
ENSMUSG00000031448	48.0547	-0.874077	0.18288	-4.7795	1.76e-06	3.51e-05	8	13221662	13254162	-	protein_coding	Adprhl1	ENSMUSG00000031448	32.5039	25.7202	56.2661	59.1768	100.841	87.8702	78.0888	74.1024	72.6289	63.8303	30.7688	28.6867	52.8569	33.0438	17.8102	27.595	19.3675	28.429	27.7086	43.7993	8	13221662	13254162	-	protein_coding	Adprhl1
ENSMUSG00000086754	13.4755	-0.87389	0.223551	-3.90913	9.26e-05	0.000878998	2	155826787	155827953	+	lncRNA	Gm16098	ENSMUSG00000086754	3.75045	13.4725	33.5433	21.9173	18.9077	23.211	38.5095	13.2326	12.9694	12.7661	10.6507	6.06835	8.80948	12.3914	3.23822	3.85046	2.76678	12.6351	9.77952	7.03917	2	155826787	155827953	+	lncRNA	Gm16098
ENSMUSG00000000732	379.824	-0.873813	0.138549	-6.3069	2.85e-10	3.15e-08	10	78069301	78083913	+	protein_coding	Icosl	ENSMUSG00000000732	248.78	486.233	517.215	442.73	613.448	486.602	595.828	460.494	754.822	419.152	269.818	250.457	405.236	301.525	183.769	241.296	228.721	191.632	245.303	253.41	10	78069301	78083913	+	protein_coding	Icosl
ENSMUSG00000103843	6.47965	-0.873787	0.228803	-3.81895	0.000134021	0.0011864	3	41562278	41563698	-	lncRNA	Gm31266	ENSMUSG00000103843	3.75045	12.2477	8.65632	10.9587	7.35298	10.7765	13.9062	9.2628	12.9694	5.31919	1.18341	2.75834	3.91533	4.13048	0	3.20872	5.53356	4.2117	1.62992	7.8213	3	41562278	41563698	-	lncRNA	Gm31266
ENSMUSG00000096002	12.4486	-0.872642	0.231219	-3.7741	0.000160589	0.00137666	7	12562850	12608788	-	protein_coding	Vmn2r53	ENSMUSG00000096002	17.5021	12.2477	12.9845	6.5752	18.9077	29.8427	36.3701	13.2326	7.78167	29.7875	11.8341	12.1367	3.91533	2.75365	0	3.85046	5.53356	12.6351	3.25984	7.8213	7	12562850	12608788	-	protein_coding	Vmn2r53
ENSMUSG00000045667	128.794	-0.872271	0.184544	-4.72662	2.28e-06	4.36e-05	11	72389163	72411713	-	protein_coding	Smtnl2	ENSMUSG00000045667	91.261	94.3072	142.829	168.763	302.523	252.834	288.822	86.0117	120.616	197.874	120.708	82.1985	87.116	121.161	72.8599	53.9065	96.8374	71.5989	60.307	63.3526	11	72389163	72411713	-	protein_coding	Smtnl2
ENSMUSG00000056316	147.263	-0.8722	0.131932	-6.611	3.82e-11	5.94e-09	10	29143281	29144194	-	TEC	Gm9996	ENSMUSG00000056316	135.016	128.601	152.568	201.639	268.909	227.965	220.36	215.691	143.961	248.938	85.2058	138.469	117.46	92.2473	93.0988	82.1432	98.6819	102.134	110.835	81.3416	10	29143281	29144194	-	TEC	Gm9996
ENSMUSG00000086405	18.9289	-0.871934	0.216897	-4.02003	5.82e-05	0.000599447	2	30629654	30689210	+	lncRNA	9330198N18Rik	ENSMUSG00000086405	16.252	8.57339	14.0665	28.4925	40.9666	54.7116	36.3701	21.1721	14.2664	31.9151	5.91707	9.93002	12.7248	19.2756	17.0006	14.1184	6.45583	10.5293	4.88976	10.9498	2	30629654	30689210	+	lncRNA	9330198N18Rik
ENSMUSG00000115389	21.6977	-0.871377	0.193791	-4.49648	6.91e-06	0.000107101	14	49220897	49223364	+	TEC	Gm48936	ENSMUSG00000115389	21.2526	19.5963	14.0665	33.9719	42.017	25.6979	39.5792	21.1721	41.5022	36.1705	18.9346	7.72335	19.5766	22.0292	12.9529	14.1184	7.37809	10.5293	16.2992	9.38556	14	49220897	49223364	+	TEC	Gm48936
ENSMUSG00000049758	3.17764	-0.870213	0.218221	-3.98776	6.67e-05	0.000668902	2	112154197	112159157	+	protein_coding	Olfr1318	ENSMUSG00000049758	3.75045	4.89908	2.16408	13.1504	2.10085	3.31586	6.41826	2.64651	12.9694	6.38303	0	3.31001	0	0	0	0	0	0	2.44488	0	2	112154197	112159157	+	protein_coding	Olfr1318
ENSMUSG00000108242	113.931	-0.869878	0.144251	-6.03032	1.64e-09	1.25e-07	6	63248493	63257625	-	lncRNA	9330118I20Rik	ENSMUSG00000108242	123.765	105.33	129.845	187.393	123.95	237.084	177.572	127.033	108.943	185.108	93.4897	91.5769	89.0737	89.4937	72.8599	47.489	56.2579	90.5516	64.3818	77.4309	6	63248493	63257625	-	lncRNA	9330118I20Rik
ENSMUSG00000044734	89.6567	-0.86893	0.145682	-5.96455	2.45e-09	1.74e-07	13	32842091	32851185	-	protein_coding	Serpinb1a	ENSMUSG00000044734	111.263	120.027	159.06	120.545	112.396	124.345	166.875	71.4559	114.131	85.107	81.6556	62.8901	80.2642	70.2181	43.716	35.9376	60.8692	50.5404	73.3464	48.4921	13	32842091	32851185	-	protein_coding	Serpinb1a
ENSMUSG00000110129	152.442	-0.868667	0.141867	-6.12311	9.18e-10	7.94e-08	8	22410456	22411309	+	TEC	Gm45453	ENSMUSG00000110129	177.521	84.5091	185.029	235.611	282.564	230.452	262.079	178.64	194.542	184.044	100.59	105.92	130.185	110.146	86.6224	65.4578	126.35	101.081	102.685	104.805	8	22410456	22411309	+	TEC	Gm45453
ENSMUSG00000024222	6998.84	-0.868447	0.174416	-4.97917	6.39e-07	1.55e-05	17	28399093	28517527	-	protein_coding	Fkbp5	ENSMUSG00000024222	4015.48	5159.95	6539.85	10359.2	12244.8	11831.8	10120.5	9567.15	13151	11258.6	2575.11	6182.54	5685.05	6549.56	3689.95	3835.06	4533.83	2763.93	3877.58	6035.7	17	28399093	28517527	-	protein_coding	Fkbp5
ENSMUSG00000110673	23.7558	-0.868274	0.215705	-4.02529	5.69e-05	0.000588992	8	121666813	121674088	-	lncRNA	Gm45833	ENSMUSG00000110673	20.0024	26.9449	25.969	65.752	33.6136	40.6192	38.5095	29.1117	33.7206	21.2768	14.201	18.7567	17.619	8.26096	19.4293	12.8349	33.2014	4.2117	3.25984	7.8213	8	121666813	121674088	-	lncRNA	Gm45833
ENSMUSG00000076752	8.29191	-0.868019	0.232165	-3.7388	0.000184902	0.00155082	13	19304648	19307551	-	TR_C_gene	Trgc2	ENSMUSG00000076752	5.0006	7.34862	5.4102	26.3008	5.25213	10.7765	17.1153	15.8791	22.0481	9.57454	3.55024	6.62001	3.91533	5.5073	1.61911	0.641744	1.84452	3.15878	4.88976	9.38556	13	19304648	19307551	-	TR_C_gene	Trgc2
ENSMUSG00000102540	27.7219	-0.867602	0.211632	-4.09959	4.14e-05	0.000453014	9	108010975	108016608	-	lncRNA	Gm38134	ENSMUSG00000102540	22.5027	46.5412	16.2306	36.1636	14.706	22.382	43.8581	29.1117	101.162	55.3196	16.5678	14.895	19.5766	24.7829	12.9529	11.5514	15.6784	10.5293	20.374	19.5533	9	108010975	108016608	-	lncRNA	Gm38134
ENSMUSG00000031981	21.0045	-0.86604	0.186508	-4.64345	3.43e-06	6.06e-05	8	124576110	124618731	+	protein_coding	Capn9	ENSMUSG00000031981	22.5027	22.0458	37.8714	17.5339	39.9162	38.9613	23.5336	33.0814	24.642	23.4044	7.10049	12.6884	19.5766	20.6524	6.47644	9.62615	18.4452	15.7939	10.5945	15.6426	8	124576110	124618731	+	protein_coding	Capn9
ENSMUSG00000082969	44.2399	-0.865706	0.197028	-4.39382	1.11e-05	0.000156651	4	86817793	86818577	-	processed_pseudogene	Gm12630	ENSMUSG00000082969	30.0036	17.1468	31.3792	76.7107	90.3366	97.8178	69.5311	70.1326	70.035	54.2557	16.5678	30.8934	46.9839	20.6524	25.9058	34.0124	18.4452	30.5348	26.0787	27.3746	4	86817793	86818577	-	processed_pseudogene	Gm12630
ENSMUSG00000115480	10.0047	-0.865522	0.232566	-3.72161	0.000197954	0.00163259	15	8512326	8532794	+	lncRNA	Gm49249	ENSMUSG00000115480	11.2514	7.34862	8.65632	12.0545	12.6051	21.5531	27.8124	9.2628	10.3756	29.7875	3.55024	9.37835	0	4.13048	0.809555	3.20872	2.76678	12.6351	9.77952	3.12852	15	8512326	8532794	+	lncRNA	Gm49249
ENSMUSG00000031734	20.7155	-0.865502	0.232683	-3.71966	0.000199491	0.00164217	8	91798524	91802067	-	protein_coding	Irx3	ENSMUSG00000031734	11.2514	18.3715	17.3126	6.5752	33.6136	41.4482	9.62738	26.4651	129.694	18.0852	4.73366	5.51668	15.6613	13.7683	7.28599	13.4766	14.7562	7.37048	13.0394	6.25704	8	91798524	91802067	-	protein_coding	Irx3
ENSMUSG00000070780	97.1319	-0.864857	0.152155	-5.68404	1.32e-08	6.81e-07	5	66016548	66173118	-	protein_coding	Rbm47	ENSMUSG00000070780	81.2598	156.77	89.8094	84.3817	164.917	129.318	151.899	103.214	207.511	118.086	59.1707	52.9601	74.3912	110.146	66.3835	64.1744	58.1024	58.9638	61.122	50.0563	5	66016548	66173118	-	protein_coding	Rbm47
ENSMUSG00000108307	13.8554	-0.864726	0.209751	-4.12263	3.75e-05	0.000417897	7	16648948	16657476	-	transcribed_unprocessed_pseudogene	Ceacam-ps1	ENSMUSG00000108307	22.5027	7.34862	14.0665	21.9173	18.9077	25.6979	20.3245	18.5256	12.9694	29.7875	9.46732	4.96501	1.95766	8.26096	7.28599	7.05918	17.523	12.6351	6.51968	9.38556	7	16648948	16657476	-	transcribed_unprocessed_pseudogene	Ceacam-ps1
ENSMUSG00000079539	4.59771	-0.864479	0.233236	-3.70646	0.000210176	0.00171584	2	25737008	25740097	+	protein_coding	Obp2b	ENSMUSG00000079539	5.0006	2.44954	0	12.0545	12.6051	10.7765	11.7668	5.29303	5.18778	7.44687	2.36683	2.20667	1.95766	0	3.23822	3.20872	1.84452	2.10585	2.44488	0	2	25737008	25740097	+	protein_coding	Obp2b
ENSMUSG00000086657	34.6532	-0.863986	0.172422	-5.01088	5.42e-07	1.36e-05	2	14070331	14073934	-	lncRNA	Stamos	ENSMUSG00000086657	36.2544	30.6192	41.1175	59.1768	71.4289	41.4482	42.7884	64.8396	35.0175	42.5535	20.118	22.0667	14.6825	30.2902	43.716	21.8193	20.2897	18.9527	17.1142	18.7711	2	14070331	14073934	-	lncRNA	Stamos
ENSMUSG00000023243	40.608	-0.862493	0.182197	-4.73384	2.2e-06	4.24e-05	14	20140056	20181809	-	protein_coding	Kcnk5	ENSMUSG00000023243	72.5088	46.5412	70.3326	48.2181	48.3196	37.3034	83.4373	31.7582	77.8167	32.979	18.9346	24.2734	29.3649	35.7975	50.1924	23.1028	21.212	16.8468	24.4488	18.7711	14	20140056	20181809	-	protein_coding	Kcnk5
ENSMUSG00000056738	67.8702	-0.862261	0.175814	-4.9044	9.37e-07	2.12e-05	2	129218968	129235604	+	lncRNA	A730036I17Rik	ENSMUSG00000056738	45.0054	48.9908	93.0555	110.683	157.564	117.713	91.995	75.4257	57.0656	113.831	43.7863	40.2718	48.9416	55.073	46.1446	62.2491	42.424	53.6992	26.8937	26.5924	2	129218968	129235604	+	lncRNA	A730036I17Rik
ENSMUSG00000079685	30.8383	-0.861803	0.175268	-4.91707	8.78e-07	2.01e-05	10	7440361	7473638	-	protein_coding	Ulbp1	ENSMUSG00000079685	37.5045	24.4954	34.6253	43.8347	48.3196	60.5144	54.5552	34.4047	41.5022	36.1705	16.5678	12.1367	18.5978	11.0146	22.6675	32.7289	22.1343	13.688	30.9685	20.3354	10	7440361	7473638	-	protein_coding	Ulbp1
ENSMUSG00000103261	13.677	-0.861739	0.232288	-3.70979	0.000207432	0.00169842	3	84058967	84063452	-	TEC	Gm36981	ENSMUSG00000103261	12.5015	2.44954	2.16408	33.9719	27.3111	28.1848	17.1153	13.2326	44.0961	38.2982	0	16.55	3.91533	0	3.23822	2.56697	3.68904	7.37048	11.4094	5.47491	3	84058967	84063452	-	TEC	Gm36981
ENSMUSG00000104682	195.735	-0.861199	0.175521	-4.90653	9.27e-07	2.1e-05	5	145292769	145295008	+	TEC	Gm42636	ENSMUSG00000104682	135.016	166.569	175.291	288.213	266.808	305.059	373.329	283.177	294.406	342.556	130.176	157.777	166.401	184.495	64.7644	47.489	144.795	102.134	154.842	131.398	5	145292769	145295008	+	TEC	Gm42636
ENSMUSG00000090113	5.87222	-0.860817	0.232345	-3.70491	0.000211467	0.00172455	17	25942232	25944961	-	protein_coding	Nhlrc4	ENSMUSG00000090113	10.0012	18.3715	7.57428	6.5752	9.45383	0.828964	13.9062	7.93954	2.59389	15.9576	4.73366	1.655	2.93649	6.88413	0	3.20872	0	0	3.25984	1.56426	17	25942232	25944961	-	protein_coding	Nhlrc4
ENSMUSG00000031853	367.847	-0.860663	0.139348	-6.17635	6.56e-10	6.11e-08	8	125910449	125947440	+	protein_coding	Map3k21	ENSMUSG00000031853	361.294	270.674	381.96	487.661	615.549	807.411	494.206	373.159	577.14	481.919	332.539	206.324	217.301	191.379	272.82	220.76	213.042	290.607	281.976	279.221	8	125910449	125947440	+	protein_coding	Map3k21
ENSMUSG00000036832	30.6543	-0.860454	0.18525	-4.64482	3.4e-06	6.02e-05	3	146220962	146286186	+	protein_coding	Lpar3	ENSMUSG00000036832	37.5045	53.8899	54.102	41.6429	50.4204	28.1848	44.9278	18.5256	53.1747	31.9151	33.1356	12.1367	19.5766	13.7683	9.71466	25.6697	25.8233	25.2702	21.189	12.5141	3	146220962	146286186	+	protein_coding	Lpar3
ENSMUSG00000054746	10.9895	-0.860267	0.218676	-3.93399	8.35e-05	0.000804432	7	120328669	120407687	+	protein_coding	Abca15	ENSMUSG00000054746	13.7517	12.2477	6.49224	10.9587	12.6051	14.9214	21.3942	14.5558	19.4542	28.7236	7.10049	7.72335	0.978832	8.26096	8.09555	1.92523	4.6113	11.5822	8.1496	6.25704	7	120328669	120407687	+	protein_coding	Abca15
ENSMUSG00000020286	255.069	-0.859721	0.227824	-3.77363	0.00016089	0.00137886	11	23516202	23521155	-	protein_coding	1700093K21Rik	ENSMUSG00000020286	160.019	115.128	136.337	592.864	476.893	498.207	639.686	276.561	300.891	513.834	66.2712	207.427	249.602	207.901	38.0491	56.4734	95.9151	166.362	162.177	140.783	11	23516202	23521155	-	protein_coding	1700093K21Rik
ENSMUSG00000068259	19.6966	-0.859523	0.208397	-4.12445	3.72e-05	0.000415208	6	40542170	40555050	-	protein_coding	Olfr461	ENSMUSG00000068259	10.0012	17.1468	29.2151	16.438	33.6136	21.5531	35.3004	18.5256	46.69	44.6812	4.73366	15.4467	12.7248	20.6524	9.71466	5.13395	12.9117	11.5822	12.2244	15.6426	6	40542170	40555050	-	protein_coding	Olfr461
ENSMUSG00000020884	64.9208	-0.85944	0.149992	-5.72989	1e-08	5.42e-07	11	70054084	70057894	+	protein_coding	Asgr1	ENSMUSG00000020884	52.5063	78.3852	85.4812	67.9437	126.051	104.449	83.4373	63.5163	76.5197	118.086	48.52	32.5484	38.1744	52.3194	40.4777	34.6542	31.3569	63.1755	56.2322	44.5814	11	70054084	70057894	+	protein_coding	Asgr1
ENSMUSG00000024471	3.39919	-0.858272	0.210591	-4.07553	4.59e-05	0.000493329	18	44334073	44355724	+	protein_coding	Myot	ENSMUSG00000024471	2.5003	2.44954	7.57428	2.19173	8.4034	9.94757	20.3245	2.64651	7.78167	0	0	2.20667	1.95766	0	0	0	0	0	0	0	18	44334073	44355724	+	protein_coding	Myot
ENSMUSG00000114534	6.90876	-0.857799	0.233483	-3.67392	0.000238853	0.00190282	13	107524060	107565331	-	lncRNA	Gm32004	ENSMUSG00000114534	5.0006	7.34862	17.3126	4.38347	23.1094	11.6055	7.48797	10.5861	7.78167	11.7022	1.18341	7.72335	7.83065	2.75365	2.42866	0	2.76678	0	3.25984	3.91065	13	107524060	107565331	-	lncRNA	Gm32004
ENSMUSG00000109401	416.432	-0.857173	0.164392	-5.21419	1.85e-07	5.76e-06	7	81455894	81458006	+	TEC	Cpeb1os1	ENSMUSG00000109401	402.549	203.312	521.544	654.232	754.205	759.331	669.638	472.403	373.52	742.559	234.316	371.272	368.041	351.091	170.816	199.582	294.201	303.242	257.527	225.254	7	81455894	81458006	+	TEC	Cpeb1os1
ENSMUSG00000085196	18.9734	-0.856481	0.19628	-4.36356	1.28e-05	0.000175072	19	6268794	6276605	-	lncRNA	Gm14963	ENSMUSG00000085196	22.5027	19.5963	33.5433	28.4925	45.1683	24.8689	26.7427	29.1117	6.48472	22.3406	10.6507	17.6534	13.7036	16.5219	10.5242	10.2679	10.1449	12.6351	13.0394	5.47491	19	6268794	6276605	-	lncRNA	Gm14963
ENSMUSG00000114418	7.24903	-0.856116	0.233539	-3.66585	0.000246523	0.00195174	13	112699678	112700036	+	processed_pseudogene	Gm18883	ENSMUSG00000114418	5.0006	4.89908	7.57428	27.3967	2.10085	10.7765	10.6971	11.9093	10.3756	20.2129	5.91707	2.75834	2.93649	5.5073	4.85733	0.641744	6.45583	1.05293	0	3.91065	13	112699678	112700036	+	processed_pseudogene	Gm18883
ENSMUSG00000037161	5.68489	-0.855988	0.233533	-3.66538	0.000246968	0.00195327	3	51388411	51396738	-	protein_coding	Mgarp	ENSMUSG00000037161	10.0012	2.44954	11.9024	7.67107	11.5547	9.11861	8.55767	2.64651	16.8603	6.38303	4.73366	0.551668	1.95766	2.75365	5.66688	0	2.76678	4.2117	0	3.91065	3	51388411	51396738	-	protein_coding	Mgarp
ENSMUSG00000044172	28.1073	-0.85577	0.224352	-3.81441	0.000136508	0.0012039	17	25120759	25125292	+	protein_coding	Ptx4	ENSMUSG00000044172	16.252	24.4954	18.3947	44.9305	95.5887	53.8827	40.649	29.1117	40.2053	38.2982	2.36683	13.24	32.3014	35.7975	4.85733	13.4766	11.9894	20.0056	12.2244	14.0783	17	25120759	25125292	+	protein_coding	Ptx4
ENSMUSG00000112547	36.4093	-0.855587	0.192633	-4.44154	8.93e-06	0.000131311	12	44220386	44269118	-	lncRNA	Gm47096	ENSMUSG00000112547	21.2526	24.4954	36.7894	78.9024	66.1768	71.2909	51.346	43.6675	36.3145	63.8303	17.7512	22.6184	46.0051	27.5365	15.3815	19.8941	17.523	28.429	16.2992	22.6818	12	44220386	44269118	-	lncRNA	Gm47096
ENSMUSG00000095448	6.91957	-0.855199	0.231567	-3.6931	0.000221538	0.00179142	9	19804905	19817626	+	protein_coding	Olfr859	ENSMUSG00000095448	15.0018	6.12385	10.8204	8.76693	6.30255	11.6055	4.27884	15.8791	11.6725	12.7661	4.73366	6.62001	3.91533	0	1.61911	1.28349	3.68904	8.4234	4.88976	0	9	19804905	19817626	+	protein_coding	Olfr859
ENSMUSG00000073485	95.3343	-0.854824	0.14811	-5.77154	7.85e-09	4.46e-07	1	180813775	180816859	+	lncRNA	H3f3aos	ENSMUSG00000073485	83.7601	77.1605	146.075	138.079	122.9	160.819	179.711	107.184	111.537	131.916	55.6205	72.2685	90.0525	74.3486	50.1924	57.1152	87.6148	34.7465	69.2716	56.3134	1	180813775	180816859	+	lncRNA	H3f3aos
ENSMUSG00000056184	4.19449	-0.854499	0.233528	-3.65908	0.00025312	0.00199265	15	98377698	98380946	-	protein_coding	Olfr283	ENSMUSG00000056184	2.5003	2.44954	2.16408	6.5752	8.4034	6.63171	8.55767	7.93954	10.3756	9.57454	2.36683	3.31001	1.95766	2.75365	0.809555	3.85046	0	2.10585	0	1.56426	15	98377698	98380946	-	protein_coding	Olfr283
ENSMUSG00000066629	29.9187	-0.854431	0.196162	-4.35574	1.33e-05	0.000180554	12	12912021	12912336	+	processed_pseudogene	Rpl36-ps3	ENSMUSG00000066629	20.0024	47.766	56.2661	48.2181	48.3196	46.422	51.346	37.0512	25.9389	27.6598	29.5854	29.7901	7.83065	24.7829	21.0484	25.6697	14.7562	7.37048	9.77952	18.7711	12	12912021	12912336	+	processed_pseudogene	Rpl36-ps3
ENSMUSG00000044084	6.8188	-0.853735	0.230667	-3.70115	0.000214625	0.00174611	11	69816565	69818465	-	protein_coding	Spem2	ENSMUSG00000044084	10.0012	4.89908	9.73836	25.2049	8.4034	24.8689	12.8365	5.29303	0	9.57454	0	6.62001	1.95766	5.5073	3.23822	0	1.84452	0	3.25984	3.12852	11	69816565	69818465	-	protein_coding	Spem2
ENSMUSG00000020072	172.928	-0.853211	0.166729	-5.11734	3.1e-07	8.65e-06	10	63024314	63058813	+	protein_coding	Pbld2	ENSMUSG00000020072	141.267	100.431	183.947	311.226	252.102	285.993	335.889	226.277	175.088	293.619	72.1883	139.02	170.317	151.451	85.8128	96.9033	85.7703	147.41	109.205	94.6378	10	63024314	63058813	+	protein_coding	Pbld2
ENSMUSG00000107029	5.56604	-0.85304	0.232789	-3.66443	0.000247895	0.00195855	5	135613828	135617299	-	TEC	Gm43123	ENSMUSG00000107029	7.50091	2.44954	2.16408	4.38347	13.6555	14.9214	9.62738	7.93954	11.6725	12.7661	4.73366	1.10334	3.91533	4.13048	0	0	5.53356	0	3.25984	1.56426	5	135613828	135617299	-	TEC	Gm43123
ENSMUSG00000070330	3.30544	-0.852616	0.217347	-3.92283	8.75e-05	0.000837353	11	117860751	117865543	+	protein_coding	Tmem235	ENSMUSG00000070330	1.25015	7.34862	7.57428	2.19173	2.10085	5.80275	8.55767	5.29303	19.4542	0	0	1.10334	1.95766	0	0	0	1.84452	0	1.62992	0	11	117860751	117865543	+	protein_coding	Tmem235
ENSMUSG00000109356	3.72768	-0.852003	0.228586	-3.72727	0.000193564	0.00160544	8	4368595	4402845	-	unprocessed_pseudogene	Gm45118	ENSMUSG00000109356	3.75045	1.22477	6.49224	10.9587	3.15128	16.5793	5.34855	7.93954	1.29694	5.31919	1.18341	2.75834	2.93649	0	0	1.28349	2.76678	0	0	1.56426	8	4368595	4402845	-	unprocessed_pseudogene	Gm45118
ENSMUSG00000042678	42.7648	-0.851458	0.166996	-5.09866	3.42e-07	9.32e-06	11	60469338	60528369	+	protein_coding	Myo15	ENSMUSG00000042678	48.7559	25.7202	38.9535	78.9024	63.0255	73.7778	66.322	62.1931	38.9083	73.4048	22.4849	36.4101	30.3438	39.928	28.3344	37.2211	24.901	24.2173	20.374	21.1175	11	60469338	60528369	+	protein_coding	Myo15
ENSMUSG00000090698	744.758	-0.850431	0.194438	-4.3738	1.22e-05	0.000168561	6	134981717	134986836	+	protein_coding	Apold1	ENSMUSG00000090698	810.098	705.467	599.45	690.396	1039.92	1352.87	710.287	778.075	2613.34	847.879	371.592	498.708	549.124	322.177	564.26	664.846	577.335	362.206	297.46	539.67	6	134981717	134986836	+	protein_coding	Apold1
ENSMUSG00000054181	38.2788	-0.849779	0.162964	-5.21451	1.84e-07	5.76e-06	2	57236226	57238508	-	lncRNA	A930012O16Rik	ENSMUSG00000054181	35.0042	34.2935	45.4457	79.9983	55.6725	57.1985	68.4614	43.6675	32.4236	55.3196	23.6683	25.9284	27.4073	20.6524	24.2866	16.6853	34.1236	38.9582	25.2638	21.1175	2	57236226	57238508	-	lncRNA	A930012O16Rik
ENSMUSG00000107167	5.46853	-0.849633	0.233451	-3.63946	0.000273215	0.00211961	2	34833006	34839728	+	protein_coding	Gm34653	ENSMUSG00000107167	7.50091	7.34862	10.8204	0	6.30255	9.94757	11.7668	6.61629	10.3756	13.8299	0	2.20667	3.91533	5.5073	0	2.56697	0	4.2117	4.88976	1.56426	2	34833006	34839728	+	protein_coding	Gm34653
ENSMUSG00000118159	98.2883	-0.84874	0.171314	-4.9543	7.26e-07	1.71e-05	19	53598541	53599411	-	TEC	Gm50402	ENSMUSG00000118159	73.7589	67.3623	102.794	197.256	141.807	184.03	154.038	100.568	150.446	138.299	54.4371	73.3718	93.9678	106.016	38.8586	46.2055	66.4028	73.7048	57.8621	44.5814	19	53598541	53599411	-	TEC	Gm50402
ENSMUSG00000108599	26.2341	-0.848307	0.171505	-4.94625	7.57e-07	1.77e-05	7	79466408	79468535	+	TEC	Gm10616	ENSMUSG00000108599	27.5033	31.844	42.1996	25.2049	50.4204	49.7378	29.9519	23.8186	28.5328	38.2982	29.5854	16.55	18.5978	19.2756	14.572	12.8349	22.1343	14.741	17.9291	10.9498	7	79466408	79468535	+	TEC	Gm10616
ENSMUSG00000042821	69.758	-0.848036	0.149833	-5.65987	1.51e-08	7.65e-07	2	167538194	167542814	+	protein_coding	Snai1	ENSMUSG00000042821	75.0091	41.6422	94.1375	96.4363	128.152	122.687	106.971	108.507	62.2534	84.0432	54.4371	54.6151	50.8992	60.5803	41.2873	50.056	35.0459	32.6407	47.2677	48.4921	2	167538194	167542814	+	protein_coding	Snai1
ENSMUSG00000104847	4.17891	-0.848027	0.233539	-3.6312	0.000282111	0.00217438	5	52117311	52118523	+	lncRNA	Gm43177	ENSMUSG00000104847	5.0006	4.89908	4.32816	2.19173	8.4034	7.46068	10.6971	13.2326	3.89083	5.31919	0	3.31001	3.91533	0	1.61911	1.92523	1.84452	0	1.62992	3.91065	5	52117311	52118523	+	lncRNA	Gm43177
ENSMUSG00000094628	53.5546	-0.847872	0.182132	-4.65527	3.24e-06	5.77e-05	14	4726774	4747493	+	protein_coding	Gm3252	ENSMUSG00000094628	66.258	60.0137	60.5943	47.1223	65.1264	72.9488	79.1585	47.6373	99.8648	119.15	18.9346	15.9984	48.9416	67.4645	31.5726	30.1619	43.3463	41.0641	24.4488	31.2852	14	4726774	4747493	+	protein_coding	Gm3252
ENSMUSG00000030187	12.4561	-0.847463	0.220529	-3.84287	0.000121604	0.00109355	6	131219222	131247362	-	protein_coding	Klra2	ENSMUSG00000030187	5.0006	3.67431	15.1486	26.3008	15.7564	24.04	31.0216	18.5256	19.4542	18.0852	2.36683	8.27502	8.80948	8.26096	7.28599	13.4766	4.6113	6.31755	4.88976	7.8213	6	131219222	131247362	-	protein_coding	Klra2
ENSMUSG00000060985	197.397	-0.847247	0.146241	-5.79351	6.89e-09	4.02e-07	1	156255295	156303664	-	protein_coding	Tdrd5	ENSMUSG00000060985	211.276	137.174	152.568	286.021	385.506	374.692	271.706	243.479	258.092	279.789	132.542	120.264	170.317	158.335	102.004	137.975	102.371	130.563	115.724	177.544	1	156255295	156303664	-	protein_coding	Tdrd5
ENSMUSG00000073679	7.86405	-0.847031	0.220036	-3.84952	0.000118351	0.00107058	4	155839491	155840178	-	lncRNA	Mxra8os	ENSMUSG00000073679	10.0012	4.89908	7.57428	8.76693	16.8068	10.7765	11.7668	11.9093	10.3756	17.0214	10.6507	3.31001	2.93649	5.5073	2.42866	4.49221	3.68904	6.31755	5.70472	2.34639	4	155839491	155840178	-	lncRNA	Mxra8os
ENSMUSG00000038007	635.05	-0.846542	0.206656	-4.09637	4.2e-05	0.000456903	4	86874395	86934822	+	protein_coding	Acer2	ENSMUSG00000038007	415.05	1076.57	413.339	638.89	840.34	1169.67	573.364	842.915	2041.39	757.453	256.801	328.242	361.189	348.337	567.498	617.357	332.936	195.844	313.76	610.062	4	86874395	86934822	+	protein_coding	Acer2
ENSMUSG00000028167	57.8471	-0.846132	0.16269	-5.20088	1.98e-07	6.09e-06	3	135281220	135304426	+	protein_coding	Bdh2	ENSMUSG00000028167	58.7571	77.1605	90.8914	103.011	73.5298	70.462	95.2041	46.314	101.162	50.0004	56.8039	53.5118	42.0898	52.3194	24.2866	22.461	35.9682	35.7995	37.4882	29.721	3	135281220	135304426	+	protein_coding	Bdh2
ENSMUSG00000085919	8.7673	-0.843381	0.22644	-3.72453	0.000195679	0.00161818	5	111742848	111748176	+	lncRNA	Gm16019	ENSMUSG00000085919	17.5021	2.44954	6.49224	15.3421	16.8068	10.7765	25.673	13.2326	7.78167	10.6384	4.73366	8.27502	3.91533	4.13048	3.23822	1.92523	7.37809	3.15878	4.0748	7.8213	5	111742848	111748176	+	lncRNA	Gm16019
ENSMUSG00000109936	7.11892	-0.8433	0.231954	-3.63563	0.000277303	0.00214501	7	142283209	142290418	+	lncRNA	Gm45889	ENSMUSG00000109936	10.0012	7.34862	14.0665	9.8628	22.0589	4.97378	4.27884	11.9093	7.78167	12.7661	0	2.20667	3.91533	11.0146	4.85733	2.56697	5.53356	0	4.88976	2.34639	7	142283209	142290418	+	lncRNA	Gm45889
ENSMUSG00000036770	32.5774	-0.842927	0.212138	-3.97348	7.08e-05	0.000703594	2	25212206	25214637	-	protein_coding	Stpg3	ENSMUSG00000036770	30.0036	15.922	28.1331	63.5603	50.4204	44.7641	32.0913	63.5163	63.5503	60.6388	8.2839	22.0667	31.3226	33.0438	12.9529	8.98441	5.53356	21.0585	23.6338	32.0673	2	25212206	25214637	-	protein_coding	Stpg3
ENSMUSG00000104694	42.5849	-0.84222	0.196826	-4.27901	1.88e-05	0.000237835	5	123684774	123685306	+	TEC	Gm43797	ENSMUSG00000104694	27.5033	36.7431	58.4302	65.752	34.664	73.7778	80.2282	63.5163	58.3625	80.8517	16.5678	38.0651	48.9416	31.667	13.7624	17.9688	31.3569	21.0585	40.748	11.732	5	123684774	123685306	+	TEC	Gm43797
ENSMUSG00000087893	6.12987	-0.84214	0.232573	-3.62097	0.000293504	0.00224706	3	17803620	17803747	-	snRNA	Gm23441	ENSMUSG00000087893	6.25075	4.89908	2.16408	13.1504	8.4034	14.9214	9.62738	11.9093	14.2664	5.31919	0	1.655	4.89416	9.63778	2.42866	4.49221	2.76678	1.05293	1.62992	3.12852	3	17803620	17803747	-	snRNA	Gm23441
ENSMUSG00000092239	4.41215	-0.842126	0.228829	-3.68016	0.000233091	0.00186759	17	36923791	36933432	+	lncRNA	1700031A10Rik	ENSMUSG00000092239	5.0006	4.89908	4.32816	7.67107	5.25213	21.5531	2.13942	11.9093	9.07861	1.06384	0	1.10334	0	2.75365	2.42866	3.85046	2.76678	0	2.44488	0	17	36923791	36933432	+	lncRNA	1700031A10Rik
ENSMUSG00000097365	33.1028	-0.841983	0.216606	-3.88717	0.00010142	0.000943598	3	9403063	9437233	+	lncRNA	C030034L19Rik	ENSMUSG00000097365	13.7517	13.4725	23.8049	44.9305	67.2272	63.8302	74.8797	83.3652	44.0961	35.1067	9.46732	25.3767	32.3014	22.0292	14.572	20.5358	8.30035	15.7939	17.9291	31.2852	3	9403063	9437233	+	lncRNA	C030034L19Rik
ENSMUSG00000026712	302.252	-0.841877	0.171728	-4.90238	9.47e-07	2.14e-05	2	14229391	14332057	+	protein_coding	Mrc1	ENSMUSG00000026712	333.79	607.486	322.448	312.322	299.371	391.271	340.168	379.775	696.459	352.13	246.15	129.642	127.248	129.422	167.578	356.168	130.961	296.925	161.362	264.36	2	14229391	14332057	+	protein_coding	Mrc1
ENSMUSG00000102558	4.46143	-0.84174	0.233535	-3.60435	0.000312941	0.00236983	1	155818493	155859591	+	lncRNA	Gm37571	ENSMUSG00000102558	2.5003	2.44954	10.8204	8.76693	3.15128	12.4345	7.48797	2.64651	12.9694	5.31919	1.18341	0.551668	2.93649	0	3.23822	1.92523	1.84452	4.2117	2.44488	2.34639	1	155818493	155859591	+	lncRNA	Gm37571
ENSMUSG00000117538	9.98469	-0.841544	0.226016	-3.72338	0.000196576	0.00162385	17	86773269	86774648	+	TEC	Gm50008	ENSMUSG00000117538	5.0006	14.6972	4.32816	12.0545	22.0589	23.211	18.1851	11.9093	16.8603	14.8937	2.36683	3.31001	5.87299	9.63778	4.85733	6.41744	7.37809	0	5.70472	10.9498	17	86773269	86774648	+	TEC	Gm50008
ENSMUSG00000006204	16.6908	-0.841132	0.227017	-3.70515	0.000211264	0.00172334	7	131174401	131306451	+	protein_coding	Cdcp3	ENSMUSG00000006204	11.2514	11.0229	12.9845	41.6429	24.1598	9.94757	18.1851	25.1419	47.987	38.2982	8.2839	16.55	16.6401	12.3914	4.85733	1.92523	12.9117	8.4234	6.51968	4.69278	7	131174401	131306451	+	protein_coding	Cdcp3
ENSMUSG00000101223	11.6036	-0.840106	0.23262	-3.61149	0.00030444	0.00231699	1	34477166	34485933	-	lncRNA	4930568A12Rik	ENSMUSG00000101223	18.7523	24.4954	9.73836	17.5339	6.30255	13.2634	23.5336	15.8791	19.4542	24.4683	9.46732	6.06835	21.5343	2.75365	4.04777	8.34267	2.76678	2.10585	0	1.56426	1	34477166	34485933	-	lncRNA	4930568A12Rik
ENSMUSG00000087575	42.4734	-0.839791	0.201591	-4.16582	3.1e-05	0.000360216	4	129261964	129265010	+	lncRNA	Gm12976	ENSMUSG00000087575	35.0042	17.1468	37.8714	73.4231	74.5802	91.1861	57.7643	59.5466	36.3145	97.8731	21.3015	40.8234	16.6401	34.4206	14.572	15.4018	23.9788	33.6936	35.8582	32.0673	4	129261964	129265010	+	lncRNA	Gm12976
ENSMUSG00000057246	380.271	-0.839555	0.153442	-5.47148	4.46e-08	1.86e-06	17	34398819	34460734	+	protein_coding	BC051142	ENSMUSG00000057246	270.033	211.885	500.985	735.327	568.28	610.118	707.078	494.898	378.708	541.494	197.63	318.864	340.633	294.641	221.008	210.492	255.466	253.755	247.748	246.371	17	34398819	34460734	+	protein_coding	BC051142
ENSMUSG00000066952	163.892	-0.839343	0.141131	-5.94727	2.73e-09	1.89e-07	5	114289165	114365357	+	protein_coding	Myo1h	ENSMUSG00000066952	147.518	151.871	169.88	253.145	244.749	253.663	200.036	175.993	322.939	230.853	71.0049	111.989	121.375	130.798	82.5746	73.8005	129.117	127.404	133.653	145.476	5	114289165	114365357	+	protein_coding	Myo1h
ENSMUSG00000028750	21.3107	-0.839215	0.181094	-4.63413	3.58e-06	6.26e-05	4	138724791	138746132	+	protein_coding	Pla2g2c	ENSMUSG00000028750	26.2532	24.4954	45.4457	32.876	23.1094	21.5531	20.3245	25.1419	31.1267	35.1067	10.6507	18.205	20.5555	19.2756	7.28599	7.70092	11.9894	14.741	16.2992	14.0783	4	138724791	138746132	+	protein_coding	Pla2g2c
ENSMUSG00000082524	2.42778	-0.839117	0.222418	-3.7727	0.00016149	0.00138362	5	144723626	144723797	-	processed_pseudogene	Gm6272	ENSMUSG00000082524	2.5003	3.67431	3.24612	2.19173	2.10085	5.80275	2.13942	5.29303	2.59389	12.7661	0	1.655	0	0	0	0.641744	1.84452	2.10585	0	0	5	144723626	144723797	-	processed_pseudogene	Gm6272
ENSMUSG00000109089	38.0447	-0.838742	0.156841	-5.34771	8.91e-08	3.16e-06	8	10899921	10903893	+	lncRNA	4833411C07Rik	ENSMUSG00000109089	33.7541	62.4632	44.3637	59.1768	38.8657	47.251	63.1129	38.3745	68.7381	44.6812	18.9346	16.55	36.2168	35.7975	18.6198	22.461	23.0565	29.4819	27.7086	31.2852	8	10899921	10903893	+	lncRNA	4833411C07Rik
ENSMUSG00000111097	12.0354	-0.83788	0.231494	-3.61944	0.000295239	0.0022581	9	14259040	14263803	-	lncRNA	Gm34069	ENSMUSG00000111097	3.75045	4.89908	15.1486	12.0545	25.2102	40.6192	36.3701	26.4651	9.07861	19.1491	7.10049	9.37835	3.91533	0	6.47644	3.85046	15.6784	0	0	1.56426	9	14259040	14263803	-	lncRNA	Gm34069
ENSMUSG00000090231	27.7679	-0.837807	0.22555	-3.7145	0.000203603	0.00167153	17	34856373	34862518	-	protein_coding	Cfb	ENSMUSG00000090231	6.25075	15.922	25.969	62.4644	75.6306	40.6192	57.7643	31.7582	33.7206	47.8727	3.55024	14.895	14.6825	24.7829	26.7153	25.6697	4.6113	11.5822	9.77952	21.1175	17	34856373	34862518	-	protein_coding	Cfb
ENSMUSG00000106568	39.6974	-0.83715	0.21988	-3.80731	0.000140487	0.00123367	3	88428935	88429395	+	processed_pseudogene	Gm42814	ENSMUSG00000106568	53.7565	36.7431	41.1175	81.0941	43.0674	50.5668	60.9734	62.1931	50.5809	79.7879	20.118	34.7551	40.1321	16.5219	1.61911	7.05918	42.424	12.6351	42.3779	16.4247	3	88428935	88429395	+	processed_pseudogene	Gm42814
ENSMUSG00000042918	322.372	-0.836978	0.135044	-6.19783	5.72e-10	5.48e-08	7	45639976	45646521	+	protein_coding	Mamstr	ENSMUSG00000042918	316.288	218.009	307.3	431.772	700.634	512.3	492.066	378.452	408.538	452.131	228.399	215.702	277.988	231.307	173.245	202.149	189.063	233.749	244.488	233.857	7	45639976	45646521	+	protein_coding	Mamstr
ENSMUSG00000116814	6.0883	-0.836311	0.229203	-3.64877	0.000263498	0.00205782	16	29750809	29754312	-	lncRNA	Gm49636	ENSMUSG00000116814	11.2514	2.44954	7.57428	8.76693	10.5043	9.94757	11.7668	5.29303	5.18778	14.8937	3.55024	1.655	4.89416	6.88413	3.23822	3.85046	0	2.10585	3.25984	4.69278	16	29750809	29754312	-	lncRNA	Gm49636
ENSMUSG00000041577	594.141	-0.835409	0.118616	-7.04298	1.88e-12	5.06e-10	1	133910303	133921414	-	protein_coding	Prelp	ENSMUSG00000041577	631.326	955.32	1116.67	773.682	565.129	583.591	836.513	734.408	961.036	576.6	514.785	366.307	328.887	302.902	459.018	430.61	448.219	429.593	467.787	400.451	1	133910303	133921414	-	protein_coding	Prelp
ENSMUSG00000112294	34.1643	-0.835234	0.205836	-4.05777	4.95e-05	0.000526451	10	123196694	123199418	+	lncRNA	Gm4129	ENSMUSG00000112294	25.003	24.4954	46.5277	52.6016	52.5213	58.0275	48.1369	33.0814	47.987	78.724	27.2185	23.1701	31.3226	28.9133	8.9051	3.85046	23.0565	33.6936	21.189	14.8605	10	123196694	123199418	+	lncRNA	Gm4129
ENSMUSG00000117980	76.2737	-0.835172	0.162316	-5.14534	2.67e-07	7.7e-06	17	31912665	31913320	+	TEC	Gm30571	ENSMUSG00000117980	53.7565	91.8577	76.8249	127.121	90.3366	104.449	105.901	127.033	83.0045	148.937	54.4371	59.5801	41.1109	74.3486	47.7637	51.3395	47.9576	44.2229	21.189	74.3024	17	31912665	31913320	+	TEC	Gm30571
ENSMUSG00000042213	545.6	-0.835168	0.148577	-5.62113	1.9e-08	9.21e-07	6	116264221	116330302	+	protein_coding	Zfand4	ENSMUSG00000042213	396.298	406.623	518.297	805.462	1082.99	760.16	1079.34	571.647	721.101	835.113	281.653	454.023	473.754	466.744	350.537	360.66	368.904	302.189	290.126	386.372	6	116264221	116330302	+	protein_coding	Zfand4
ENSMUSG00000097917	22.3801	-0.834519	0.215318	-3.87576	0.000106293	0.000981491	12	99563795	99620038	+	lncRNA	Gm26839	ENSMUSG00000097917	17.5021	22.0458	29.2151	31.7801	48.3196	28.1848	59.9037	25.1419	32.4236	18.0852	7.10049	13.7917	18.5978	20.6524	15.3815	17.9688	2.76678	2.10585	16.2992	20.3354	12	99563795	99620038	+	lncRNA	Gm26839
ENSMUSG00000026736	103.678	-0.834439	0.152709	-5.46426	4.65e-08	1.9e-06	2	18998342	18999804	+	lncRNA	4930426L09Rik	ENSMUSG00000026736	91.261	67.3623	108.204	183.01	179.623	209.728	147.62	127.033	125.804	126.597	69.8215	82.7502	88.0948	56.4499	55.0497	62.2491	74.7031	49.4875	91.2755	77.4309	2	18998342	18999804	+	lncRNA	4930426L09Rik
ENSMUSG00000022803	66.1068	-0.833707	0.134002	-6.2216	4.92e-10	4.87e-08	16	38362208	38378216	+	protein_coding	Popdc2	ENSMUSG00000022803	67.5081	88.1834	66.0045	104.107	90.3366	82.8964	94.1344	88.6582	114.131	67.0218	52.0702	47.4434	46.0051	66.0876	28.3344	46.2055	38.735	29.4819	57.8621	46.9278	16	38362208	38378216	+	protein_coding	Popdc2
ENSMUSG00000111639	17.3712	-0.83299	0.214861	-3.87688	0.000105804	0.000978329	9	119983145	119988092	+	lncRNA	1700019L13Rik	ENSMUSG00000111639	22.5027	4.89908	12.9845	44.9305	32.5632	21.5531	32.0913	27.7884	9.07861	34.0428	5.91707	8.82669	12.7248	6.88413	10.5242	14.7601	11.0671	13.688	6.51968	14.0783	9	119983145	119988092	+	lncRNA	1700019L13Rik
ENSMUSG00000090002	23.8653	-0.831233	0.21863	-3.80201	0.000143528	0.00125749	15	57708113	57708927	-	lncRNA	Gm16006	ENSMUSG00000090002	18.7523	17.1468	46.5277	26.3008	43.0674	41.4482	44.9278	21.1721	36.3145	38.2982	14.201	20.4117	27.4073	24.7829	1.61911	8.98441	7.37809	4.2117	17.9291	16.4247	15	57708113	57708927	-	lncRNA	Gm16006
ENSMUSG00000107261	3.23175	-0.831126	0.231767	-3.58605	0.000335728	0.00250403	5	91737704	91738079	-	processed_pseudogene	Trmt112-ps1	ENSMUSG00000107261	7.50091	7.34862	2.16408	4.38347	6.30255	1.65793	3.20913	10.5861	5.18778	4.25535	0	2.20667	0	0	1.61911	1.28349	0	2.10585	3.25984	1.56426	5	91737704	91738079	-	processed_pseudogene	Trmt112-ps1
ENSMUSG00000044583	339.117	-0.831083	0.132824	-6.257	3.92e-10	4.09e-08	X	167304928	167330558	-	protein_coding	Tlr7	ENSMUSG00000044583	310.037	382.128	330.022	356.157	469.54	541.314	478.16	386.391	702.944	474.472	249.7	217.909	271.136	183.118	299.535	315.096	188.141	160.045	202.925	263.578	X	167304928	167330558	-	protein_coding	Tlr7
ENSMUSG00000116762	8.43539	-0.830848	0.222565	-3.73305	0.000189174	0.00157959	16	31508386	31511777	+	lncRNA	Gm46560	ENSMUSG00000116762	8.75106	2.44954	8.65632	9.8628	18.9077	13.2634	12.8365	7.93954	19.4542	15.9576	7.10049	3.31001	6.85182	6.88413	5.66688	2.56697	7.37809	5.26463	3.25984	2.34639	16	31508386	31511777	+	lncRNA	Gm46560
ENSMUSG00000046828	13.9099	-0.830216	0.222867	-3.72517	0.000195182	0.00161538	1	44204069	44218961	-	protein_coding	Mettl21e	ENSMUSG00000046828	18.7523	13.4725	15.1486	19.7256	5.25213	24.04	12.8365	10.5861	50.5809	27.6598	7.10049	8.82669	6.85182	9.63778	10.5242	13.4766	7.37809	2.10585	4.0748	10.1677	1	44204069	44218961	-	protein_coding	Mettl21e
ENSMUSG00000024679	89.0063	-0.8302	0.192295	-4.31733	1.58e-05	0.000207883	19	11586603	11604849	-	protein_coding	Ms4a6d	ENSMUSG00000024679	61.2574	236.38	66.0045	83.2859	95.5887	86.2123	89.8556	83.3652	287.922	114.895	61.5376	49.6501	47.9627	39.928	62.3357	74.4423	62.7137	55.805	52.1574	68.8275	19	11586603	11604849	-	protein_coding	Ms4a6d
ENSMUSG00000115113	14.3474	-0.830104	0.232002	-3.57801	0.000346221	0.00256911	17	33873836	33874082	+	protein_coding	Smim40-ps	ENSMUSG00000115113	5.0006	12.2477	22.7229	35.0677	31.5128	30.6717	18.1851	30.4349	15.5633	11.7022	0	6.06835	3.91533	1.37683	21.858	9.62615	2.76678	10.5293	12.2244	5.47491	17	33873836	33874082	+	protein_coding	Smim40-ps
ENSMUSG00000085603	49.3506	-0.830075	0.21563	-3.84954	0.00011834	0.00107058	13	24596346	24604925	-	transcribed_processed_pseudogene	Gm11346	ENSMUSG00000085603	32.5039	22.0458	60.5943	73.4231	121.849	107.765	90.9253	59.5466	44.0961	75.5325	21.3015	59.0285	60.6876	27.5365	25.9058	17.3271	23.9788	6.31755	27.7086	28.9388	13	24596346	24604925	-	transcribed_processed_pseudogene	Gm11346
ENSMUSG00000085914	25.2822	-0.829401	0.17258	-4.80589	1.54e-06	3.17e-05	2	167662108	167667697	+	lncRNA	Gm14320	ENSMUSG00000085914	21.2526	20.8211	33.5433	40.5471	29.4119	37.3034	44.9278	38.3745	33.7206	32.979	15.3844	11.0334	25.4496	26.1597	15.3815	8.98441	20.2897	18.9527	15.4842	15.6426	2	167662108	167667697	+	lncRNA	Gm14320
ENSMUSG00000097295	5.50928	-0.828101	0.232251	-3.56554	0.000363102	0.00267341	10	22262741	22263367	-	processed_pseudogene	Hmgb1-ps8	ENSMUSG00000097295	2.5003	2.44954	10.8204	8.76693	7.35298	14.0924	14.9759	7.93954	3.89083	8.5107	2.36683	2.75834	5.87299	4.13048	1.61911	5.13395	0.922261	2.10585	1.62992	2.34639	10	22262741	22263367	-	processed_pseudogene	Hmgb1-ps8
ENSMUSG00000086645	315.346	-0.827532	0.150549	-5.49676	3.87e-08	1.66e-06	16	31427875	31429776	-	lncRNA	Gm15743	ENSMUSG00000086645	275.033	208.211	484.754	532.591	488.448	407.85	432.163	449.907	392.974	471.28	228.399	285.212	210.449	225.799	110.099	126.423	207.509	223.22	268.937	277.656	16	31427875	31429776	-	lncRNA	Gm15743
ENSMUSG00000083668	10.1472	-0.827278	0.225476	-3.66903	0.000243477	0.00193362	X	121334987	121336574	-	processed_pseudogene	Gm5648	ENSMUSG00000083668	6.25075	12.2477	4.32816	15.3421	15.7564	16.5793	25.673	15.8791	16.8603	15.9576	7.10049	9.93002	5.87299	8.26096	10.5242	1.28349	1.84452	2.10585	4.88976	6.25704	X	121334987	121336574	-	processed_pseudogene	Gm5648
ENSMUSG00000034112	305.136	-0.827017	0.198201	-4.17261	3.01e-05	0.000352111	8	119700008	119757717	+	protein_coding	Atp2c2	ENSMUSG00000034112	213.776	187.39	199.095	465.743	647.062	656.54	432.163	272.591	600.485	469.153	146.743	197.497	371.956	216.162	161.911	127.065	220.42	186.368	168.697	161.901	8	119700008	119757717	+	protein_coding	Atp2c2
ENSMUSG00000039496	224.892	-0.826319	0.129595	-6.37616	1.82e-10	2.17e-08	2	3513029	3526376	+	protein_coding	Cdnf	ENSMUSG00000039496	288.785	188.614	264.018	339.719	303.573	301.743	423.605	217.014	239.935	362.769	134.909	183.705	160.528	161.089	105.242	127.065	136.495	150.568	198.85	209.611	2	3513029	3526376	+	protein_coding	Cdnf
ENSMUSG00000087648	5.28866	-0.825979	0.233492	-3.5375	0.000403931	0.00290866	2	168152602	168154513	-	lncRNA	E130018N17Rik	ENSMUSG00000087648	3.75045	3.67431	2.16408	13.1504	6.30255	14.0924	8.55767	15.8791	7.78167	6.38303	0	2.20667	4.89416	1.37683	1.61911	4.49221	0	3.15878	0.81496	5.47491	2	168152602	168154513	-	lncRNA	E130018N17Rik
ENSMUSG00000021999	16.6294	-0.825933	0.203203	-4.06456	4.81e-05	0.000514233	14	75242286	75283555	+	protein_coding	Cpb2	ENSMUSG00000021999	17.5021	11.0229	16.2306	18.6297	16.8068	29.8427	34.2307	13.2326	27.2358	41.4897	8.2839	12.1367	14.6825	11.0146	4.85733	7.70092	10.1449	16.8468	8.96456	11.732	14	75242286	75283555	+	protein_coding	Cpb2
ENSMUSG00000100747	87.2657	-0.825568	0.141512	-5.8339	5.41e-09	3.29e-07	2	30236794	30238223	-	lncRNA	1700084E18Rik	ENSMUSG00000100747	81.2598	79.61	93.0555	145.75	165.967	144.24	115.529	82.0419	115.428	117.022	48.52	59.0285	85.1583	68.8413	54.2402	52.623	61.7915	47.3816	47.2677	80.5594	2	30236794	30238223	-	lncRNA	1700084E18Rik
ENSMUSG00000031766	66.9886	-0.824924	0.188766	-4.37008	1.24e-05	0.000170996	8	94329200	94366214	+	protein_coding	Slc12a3	ENSMUSG00000031766	18.7523	48.9908	81.153	113.97	147.06	105.278	97.3435	109.83	84.3014	94.6816	36.6858	49.0984	57.7511	42.6816	54.2402	57.1152	51.6466	29.4819	26.0787	33.6316	8	94329200	94366214	+	protein_coding	Slc12a3
ENSMUSG00000105954	1.83999	-0.824582	0.207041	-3.9827	6.81e-05	0.000680635	5	104435120	104436372	+	TEC	Gm42793	ENSMUSG00000105954	0	4.89908	2.16408	2.19173	8.4034	1.65793	2.13942	2.64651	6.48472	4.25535	0	0	1.95766	0	0	0	0	0	0	0	5	104435120	104436372	+	TEC	Gm42793
ENSMUSG00000097692	23.16	-0.824474	0.164737	-5.00479	5.59e-07	1.4e-05	10	86020440	86022329	-	lncRNA	A230060F14Rik	ENSMUSG00000097692	17.5021	33.0688	34.6253	35.0677	26.2606	31.5006	42.7884	33.0814	23.345	29.7875	9.46732	16.55	10.7671	16.5219	13.7624	19.8941	20.2897	16.8468	19.559	12.5141	10	86020440	86022329	-	lncRNA	A230060F14Rik
ENSMUSG00000069456	14.9388	-0.823817	0.205806	-4.00289	6.26e-05	0.000635831	10	127801151	127846565	+	protein_coding	Rdh16	ENSMUSG00000069456	21.2526	12.2477	15.1486	13.1504	12.6051	23.211	31.0216	26.4651	19.4542	31.9151	2.36683	14.3434	9.78832	5.5073	4.85733	10.2679	9.22261	10.5293	9.77952	15.6426	10	127801151	127846565	+	protein_coding	Rdh16
ENSMUSG00000035004	129.656	-0.822669	0.144325	-5.7001	1.2e-08	6.26e-07	7	121064066	121074572	-	protein_coding	Igsf6	ENSMUSG00000035004	113.764	122.477	123.353	133.696	194.329	222.162	213.942	116.447	281.437	176.597	84.0224	105.92	97.8832	78.4791	82.5746	91.1276	69.1696	74.7577	111.649	99.3305	7	121064066	121074572	-	protein_coding	Igsf6
ENSMUSG00000041293	7.02513	-0.822659	0.231986	-3.54616	0.000390894	0.00283578	17	43270328	43324737	+	protein_coding	Adgrf1	ENSMUSG00000041293	2.5003	6.12385	8.65632	10.9587	14.706	8.28964	16.0456	10.5861	12.9694	12.7661	2.36683	3.31001	3.91533	5.5073	3.23822	1.28349	1.84452	2.10585	0.81496	12.5141	17	43270328	43324737	+	protein_coding	Adgrf1
ENSMUSG00000107573	4.61393	-0.821999	0.228599	-3.59582	0.00032337	0.00243437	11	49423066	49432968	+	protein_coding	Olfr1389	ENSMUSG00000107573	2.5003	2.44954	2.16408	8.76693	12.6051	16.5793	6.41826	2.64651	7.78167	12.7661	4.73366	1.10334	0	5.5073	0	1.28349	1.84452	0	0	3.12852	11	49423066	49432968	+	protein_coding	Olfr1389
ENSMUSG00000085519	12.2578	-0.821118	0.212556	-3.86307	0.000111971	0.00102496	2	73357267	73364333	+	lncRNA	Gm13703	ENSMUSG00000085519	12.5015	15.922	15.1486	10.9587	10.5043	16.5793	16.0456	26.4651	37.6114	9.57454	3.55024	9.93002	11.746	4.13048	7.28599	8.34267	8.30035	6.31755	4.0748	10.1677	2	73357267	73364333	+	lncRNA	Gm13703
ENSMUSG00000097675	182.878	-0.820829	0.100511	-8.16652	3.17e-16	2.75e-13	6	129531949	129533817	-	lncRNA	1700101I11Rik	ENSMUSG00000097675	232.528	176.367	190.439	232.324	220.589	265.269	278.124	243.479	247.716	272.343	133.726	149.502	110.608	123.914	106.052	103.321	119.894	156.886	165.437	129.052	6	129531949	129533817	-	lncRNA	1700101I11Rik
ENSMUSG00000074178	274.896	-0.820823	0.131437	-6.245	4.24e-10	4.34e-08	8	86745452	86748655	+	lncRNA	Gm10638	ENSMUSG00000074178	218.776	209.436	337.597	433.963	433.826	487.431	395.792	317.582	309.97	430.854	192.897	188.67	270.158	203.77	165.149	198.299	194.597	186.368	188.256	134.526	8	86745452	86748655	+	lncRNA	Gm10638
ENSMUSG00000031443	40.5944	-0.82069	0.208928	-3.9281	8.56e-05	0.000822313	8	13026033	13035809	+	protein_coding	F7	ENSMUSG00000031443	52.5063	13.4725	63.8404	69.0396	54.6221	34.8165	89.8556	59.5466	49.2839	71.2771	16.5678	31.4451	50.8992	24.7829	11.3338	13.4766	20.2897	12.6351	44.8228	27.3746	8	13026033	13035809	+	protein_coding	F7
ENSMUSG00000069515	5.21621	-0.820221	0.233375	-3.51461	0.000440403	0.00311926	10	117287796	117292868	-	protein_coding	Lyz1	ENSMUSG00000069515	0	8.57339	2.16408	7.67107	10.5043	7.46068	12.8365	5.29303	9.07861	14.8937	0	1.10334	3.91533	2.75365	3.23822	3.20872	1.84452	4.2117	2.44488	3.12852	10	117287796	117292868	-	protein_coding	Lyz1
ENSMUSG00000100717	8.99596	-0.819682	0.23352	-3.51011	0.000447922	0.00315937	7	135191763	135196002	-	lncRNA	1700120G07Rik	ENSMUSG00000100717	11.2514	4.89908	6.49224	25.2049	2.10085	14.0924	26.7427	7.93954	14.2664	23.4044	8.2839	7.72335	6.85182	2.75365	0	1.92523	3.68904	1.05293	7.33464	3.91065	7	135191763	135196002	-	lncRNA	1700120G07Rik
ENSMUSG00000089889	224.074	-0.819207	0.116999	-7.00184	2.53e-12	6.51e-10	5	143329246	143332704	+	lncRNA	0610040B10Rik	ENSMUSG00000089889	228.778	159.22	259.69	335.335	338.237	369.718	342.307	240.833	299.594	327.662	172.779	185.36	189.893	132.175	133.577	137.975	155.862	152.674	153.212	166.594	5	143329246	143332704	+	lncRNA	0610040B10Rik
ENSMUSG00000031209	454.242	-0.819193	0.123015	-6.65931	2.75e-11	4.53e-09	X	96455358	96574485	+	protein_coding	Heph	ENSMUSG00000031209	425.051	665.05	535.61	470.127	652.314	533.024	555.179	582.233	906.564	571.281	262.718	385.616	308.332	351.091	227.485	259.264	332.936	283.237	298.275	479.446	X	96455358	96574485	+	protein_coding	Heph
ENSMUSG00000030681	983.379	-0.818935	0.131021	-6.2504	4.09e-10	4.21e-08	7	126986859	127014621	-	protein_coding	Mvp	ENSMUSG00000030681	715.086	911.228	860.222	1266.82	1776.27	1904.13	1465.5	1262.39	1374.76	1255.33	617.742	706.687	922.059	732.471	654.12	698.217	628.982	539.098	735.909	640.565	7	126986859	127014621	-	protein_coding	Mvp
ENSMUSG00000086277	11.0278	-0.818884	0.228293	-3.58698	0.000334527	0.00249755	1	161942085	161979636	-	protein_coding	4930558K02Rik	ENSMUSG00000086277	1.25015	11.0229	16.2306	21.9173	25.2102	19.0662	25.673	10.5861	12.9694	14.8937	4.73366	7.72335	4.89416	5.5073	4.04777	1.28349	7.37809	3.15878	8.1496	14.8605	1	161942085	161979636	-	protein_coding	4930558K02Rik
ENSMUSG00000108368	117.628	-0.818863	0.153459	-5.33604	9.5e-08	3.32e-06	6	72603003	72605502	-	TEC	Gm45053	ENSMUSG00000108368	111.263	83.2843	101.712	169.859	188.026	218.847	183.99	124.386	140.07	224.47	63.9044	113.644	92.989	59.2035	75.2886	85.9936	89.4593	55.805	93.7204	76.6488	6	72603003	72605502	-	TEC	Gm45053
ENSMUSG00000112945	45.6126	-0.818711	0.174823	-4.68309	2.83e-06	5.2e-05	12	70347461	70351706	+	lncRNA	Gm32151	ENSMUSG00000112945	27.5033	40.4174	54.102	67.9437	86.1349	80.4095	79.1585	59.5466	38.9083	71.2771	15.3844	36.4101	42.0898	34.4206	21.0484	32.0872	46.113	27.3761	26.8937	25.0282	12	70347461	70351706	+	lncRNA	Gm32151
ENSMUSG00000044258	261.701	-0.818279	0.231209	-3.53913	0.000401443	0.00289472	13	60934154	60936625	-	protein_coding	Ctla2a	ENSMUSG00000044258	123.765	254.752	112.532	124.929	469.54	887.821	299.519	168.054	1075.17	311.705	98.2234	129.642	158.571	128.045	233.961	259.264	105.138	112.663	79.0511	101.677	13	60934154	60936625	-	protein_coding	Ctla2a
ENSMUSG00000021902	494.568	-0.817342	0.114264	-7.15308	8.49e-13	2.52e-10	14	31237688	31251317	-	protein_coding	Phf7	ENSMUSG00000021902	447.554	371.105	582.138	691.492	735.298	814.872	803.352	619.284	571.953	759.58	353.841	402.166	387.617	345.583	288.201	299.053	336.625	310.613	365.102	405.926	14	31237688	31251317	-	protein_coding	Phf7
ENSMUSG00000030775	116.511	-0.817318	0.147253	-5.55043	2.85e-08	1.3e-06	16	48730773	48772021	-	protein_coding	Trat1	ENSMUSG00000030775	197.524	133.5	89.8094	120.545	128.152	159.161	160.456	109.83	228.262	198.938	65.0878	89.3702	100.82	56.4499	55.0497	64.8161	88.537	96.8691	80.681	106.37	16	48730773	48772021	-	protein_coding	Trat1
ENSMUSG00000117250	42.5176	-0.8173	0.149403	-5.47046	4.49e-08	1.86e-06	17	65886419	65889035	+	lncRNA	Gm49871	ENSMUSG00000117250	51.2562	46.5412	62.7583	51.5057	46.2187	79.5806	35.3004	50.2838	71.332	61.7026	27.2185	31.9967	27.4073	20.6524	22.6675	23.7445	32.2791	47.3816	26.8937	33.6316	17	65886419	65889035	+	lncRNA	Gm49871
ENSMUSG00000026073	49.0689	-0.817104	0.232993	-3.50699	0.0004532	0.0031835	1	40074078	40125231	+	protein_coding	Il1r2	ENSMUSG00000026073	26.2532	24.4954	23.8049	33.9719	54.6221	58.0275	56.6946	55.5768	344.987	53.1919	21.3015	36.9617	40.1321	24.7829	18.6198	20.5358	20.2897	18.9527	30.9685	17.2069	1	40074078	40125231	+	protein_coding	Il1r2
ENSMUSG00000110278	6.81939	-0.81569	0.233477	-3.49366	0.000476442	0.00332291	8	13537677	13547028	-	lncRNA	Gm5608	ENSMUSG00000110278	2.5003	6.12385	6.49224	23.0132	11.5547	19.8951	7.48797	13.2326	2.59389	9.57454	4.73366	4.41334	8.80948	2.75365	0	2.56697	1.84452	3.15878	4.0748	1.56426	8	13537677	13547028	-	lncRNA	Gm5608
ENSMUSG00000074627	83.1556	-0.815071	0.147669	-5.51956	3.4e-08	1.49e-06	2	157208549	157279549	-	protein_coding	Mroh8	ENSMUSG00000074627	63.7577	69.8119	113.614	95.3404	115.547	147.556	142.271	104.537	95.9739	136.171	47.3366	58.4768	82.2218	72.9718	51.0019	34.6542	61.7915	48.4346	68.4566	53.1849	2	157208549	157279549	-	protein_coding	Mroh8
ENSMUSG00000110247	5.2388	-0.814954	0.231993	-3.51283	0.000443357	0.00313511	8	34152689	34152971	+	processed_pseudogene	Gm45269	ENSMUSG00000110247	2.5003	2.44954	14.0665	1.09587	15.7564	9.11861	8.55767	9.2628	2.59389	17.0214	1.18341	2.20667	2.93649	5.5073	0	3.85046	1.84452	0	3.25984	1.56426	8	34152689	34152971	+	processed_pseudogene	Gm45269
ENSMUSG00000029499	238.836	-0.81481	0.119855	-6.79831	1.06e-11	2.09e-09	5	110274281	110286186	-	protein_coding	Pxmp2	ENSMUSG00000029499	258.781	286.596	345.171	296.98	337.187	270.242	320.913	299.056	329.424	344.684	164.495	189.222	246.666	242.321	99.5752	132.841	147.562	127.404	167.882	169.722	5	110274281	110286186	-	protein_coding	Pxmp2
ENSMUSG00000019929	493.054	-0.812519	0.187781	-4.32694	1.51e-05	0.000200331	10	97479608	97518143	+	protein_coding	Dcn	ENSMUSG00000019929	575.069	646.678	683.85	464.648	1361.35	410.337	669.638	441.968	805.403	544.685	340.823	199.152	219.258	382.758	425.826	557.675	158.629	355.889	299.905	317.545	10	97479608	97518143	+	protein_coding	Dcn
ENSMUSG00000097787	363.277	-0.812309	0.145857	-5.5692	2.56e-08	1.19e-06	19	32389215	32391190	+	lncRNA	2700046G09Rik	ENSMUSG00000097787	358.793	329.463	434.98	632.315	571.431	565.354	546.621	517.394	307.376	478.727	253.251	317.209	366.083	272.612	140.053	141.825	275.756	216.903	264.862	274.528	19	32389215	32391190	+	lncRNA	2700046G09Rik
ENSMUSG00000105834	16.0103	-0.812216	0.204519	-3.97135	7.15e-05	0.000709274	3	157527514	157534090	-	lncRNA	4930592C13Rik	ENSMUSG00000105834	15.0018	14.6972	17.3126	23.0132	22.0589	36.4744	34.2307	10.5861	10.3756	34.0428	7.10049	10.4817	15.6613	6.88413	11.3338	7.05918	11.0671	7.37048	10.5945	14.8605	3	157527514	157534090	-	lncRNA	4930592C13Rik
ENSMUSG00000087111	16.2058	-0.811777	0.187487	-4.32978	1.49e-05	0.000198584	11	3142047	3143363	+	lncRNA	Gm11399	ENSMUSG00000087111	15.0018	14.6972	15.1486	32.876	25.2102	29.8427	18.1851	23.8186	24.642	17.0214	5.91707	9.93002	15.6613	15.1451	10.5242	10.9096	6.45583	8.4234	11.4094	13.2962	11	3142047	3143363	+	lncRNA	Gm11399
ENSMUSG00000105482	54.2638	-0.811648	0.191294	-4.24294	2.21e-05	0.000270981	5	110447988	110449946	+	lncRNA	Gm42596	ENSMUSG00000105482	50.006	26.9449	58.4302	98.628	101.891	109.423	63.1129	93.9513	49.2839	74.4687	47.3366	41.3751	47.9627	55.073	14.572	24.3863	21.212	43.1699	36.6732	27.3746	5	110447988	110449946	+	lncRNA	Gm42596
ENSMUSG00000074063	41.3011	-0.811608	0.161827	-5.01527	5.3e-07	1.33e-05	8	119434123	119446256	+	protein_coding	Osgin1	ENSMUSG00000074063	25.003	36.7431	61.6763	59.1768	68.2777	66.3171	58.834	43.6675	67.4411	56.3834	27.2185	18.205	34.2591	20.6524	29.9535	34.6542	25.8233	18.9527	39.933	32.8495	8	119434123	119446256	+	protein_coding	Osgin1
ENSMUSG00000064294	136.01	-0.811578	0.119389	-6.79775	1.06e-11	2.09e-09	1	58113129	58200698	+	protein_coding	Aox3	ENSMUSG00000064294	156.269	169.018	216.408	175.339	180.673	186.517	183.99	169.377	130.991	194.682	68.638	97.6452	107.671	66.0876	113.338	141.184	71.0141	113.716	99.4251	78.213	1	58113129	58200698	+	protein_coding	Aox3
ENSMUSG00000085578	6.95518	-0.811495	0.233175	-3.48019	0.000501054	0.00346229	11	95858161	95859174	-	lncRNA	Gm11527	ENSMUSG00000085578	8.75106	2.44954	1.08204	25.2049	3.15128	14.0924	16.0456	7.93954	12.9694	14.8937	4.73366	1.655	4.89416	4.13048	1.61911	0	6.45583	4.2117	3.25984	1.56426	11	95858161	95859174	-	lncRNA	Gm11527
ENSMUSG00000013483	35.2388	-0.810997	0.187183	-4.33263	1.47e-05	0.000196294	11	119307767	119345375	+	protein_coding	Card14	ENSMUSG00000013483	38.7547	37.9679	33.5433	59.1768	57.7734	48.0799	58.834	29.1117	57.0656	51.0642	11.8341	29.7901	58.7299	23.406	17.0006	18.6106	18.4452	18.9527	16.2992	20.3354	11	119307767	119345375	+	protein_coding	Card14
ENSMUSG00000118038	19.6653	-0.810969	0.221976	-3.65341	0.000258777	0.00202833	19	29067346	29069503	+	lncRNA	Gm9895	ENSMUSG00000118038	20.0024	29.3945	23.8049	31.7801	37.8153	9.94757	47.0672	9.2628	42.7992	24.4683	10.6507	14.895	7.83065	19.2756	7.28599	9.62615	23.9788	2.10585	4.88976	16.4247	19	29067346	29069503	+	lncRNA	Gm9895
ENSMUSG00000111149	20.7411	-0.810937	0.201224	-4.03002	5.58e-05	0.000579994	10	34230906	34233531	-	lncRNA	Gm26564	ENSMUSG00000111149	27.5033	24.4954	24.8869	37.2595	15.7564	27.3558	27.8124	34.4047	28.5328	35.1067	5.91707	20.9634	12.7248	8.26096	1.61911	16.0436	19.3675	17.8997	18.7441	10.1677	10	34230906	34233531	-	lncRNA	Gm26564
ENSMUSG00000114157	19.5737	-0.809845	0.20498	-3.95085	7.79e-05	0.000758632	12	65074989	65076315	-	TEC	Gm47870	ENSMUSG00000114157	18.7523	11.0229	21.6408	21.9173	29.4119	28.1848	43.8581	19.8489	36.3145	35.1067	16.5678	12.1367	8.80948	5.5073	6.47644	5.77569	15.6784	24.2173	13.0394	17.2069	12	65074989	65076315	-	TEC	Gm47870
ENSMUSG00000058755	21.9814	-0.809614	0.220611	-3.66988	0.000242667	0.00192969	11	4236419	4241026	+	protein_coding	Osm	ENSMUSG00000058755	22.5027	19.5963	12.9845	28.4925	21.0085	39.7903	42.7884	18.5256	59.6595	41.4897	4.73366	12.1367	17.619	30.2902	19.4293	6.41744	7.37809	4.2117	21.189	9.38556	11	4236419	4241026	+	protein_coding	Osm
ENSMUSG00000028012	28.8824	-0.809245	0.209992	-3.85369	0.000116349	0.00105589	3	129804407	129822587	-	protein_coding	Rrh	ENSMUSG00000028012	26.2532	9.79816	33.5433	38.3553	51.4708	69.633	45.9975	41.021	42.7992	38.2982	9.46732	31.9967	2.93649	16.5219	14.572	19.8941	16.6007	25.2702	24.4488	18.7711	3	129804407	129822587	-	protein_coding	Rrh
ENSMUSG00000109203	34.7483	-0.809003	0.184675	-4.38067	1.18e-05	0.000164367	7	49085082	49086981	+	lncRNA	Gm32849	ENSMUSG00000109203	38.7547	48.9908	47.6098	50.4099	29.4119	31.5006	38.5095	79.3954	41.5022	57.4473	30.7688	36.4101	15.6613	31.667	14.572	8.34267	24.901	22.1114	21.189	25.8103	7	49085082	49086981	+	lncRNA	Gm32849
ENSMUSG00000109118	80.8471	-0.8076	0.169997	-4.75067	2.03e-06	3.96e-05	7	47008082	47009008	+	lncRNA	Gm32031	ENSMUSG00000109118	63.7577	66.1375	97.3836	92.0528	140.757	154.187	123.017	111.154	108.943	111.703	47.3366	83.8535	75.37	39.928	21.858	80.2179	47.0353	52.6463	45.6377	53.967	7	47008082	47009008	+	lncRNA	Gm32031
ENSMUSG00000105870	13.567	-0.807479	0.201524	-4.00687	6.15e-05	0.000626897	5	8831146	8831447	+	TEC	7330423F06Rik	ENSMUSG00000105870	15.0018	4.89908	17.3126	13.1504	21.0085	24.8689	23.5336	19.8489	24.642	19.1491	11.8341	12.6884	7.83065	11.0146	4.85733	5.13395	8.30035	6.31755	9.77952	10.1677	5	8831146	8831447	+	TEC	7330423F06Rik
ENSMUSG00000097015	15.3078	-0.807276	0.214322	-3.76666	0.000165448	0.00141121	7	99260480	99267218	-	lncRNA	Gm26705	ENSMUSG00000097015	17.5021	13.4725	27.051	29.5884	10.5043	22.382	40.649	19.8489	6.48472	23.4044	3.55024	9.93002	12.7248	15.1451	9.71466	7.05918	14.7562	3.15878	11.4094	7.8213	7	99260480	99267218	-	lncRNA	Gm26705
ENSMUSG00000099696	2624.79	-0.807242	0.113471	-7.11409	1.13e-12	3.26e-10	9	46913492	46927366	+	lncRNA	2900052N01Rik	ENSMUSG00000099696	2311.53	2737.36	3388.95	3192.26	4870.82	3819.87	4180.42	3026.29	3420.04	2909.6	1912.4	2052.76	1566.13	2361.26	1952.65	1430.45	1883.26	1338.27	2179.2	1962.36	9	46913492	46927366	+	lncRNA	2900052N01Rik
ENSMUSG00000025389	61.4587	-0.807221	0.155648	-5.18621	2.15e-07	6.49e-06	10	128225837	128231812	+	protein_coding	Mip	ENSMUSG00000025389	47.5057	47.766	96.3016	89.8611	77.7315	124.345	102.692	62.1931	70.035	82.9794	60.3541	40.8234	27.4073	55.073	41.2873	46.8473	43.3463	46.3287	34.2283	32.0673	10	128225837	128231812	+	protein_coding	Mip
ENSMUSG00000078776	35.1496	-0.805294	0.177975	-4.52477	6.05e-06	9.6e-05	7	28129465	28164811	+	protein_coding	9530053A07Rik	ENSMUSG00000078776	17.5021	40.4174	38.9535	59.1768	63.0255	59.6854	65.2523	33.0814	33.7206	53.1919	16.5678	24.2734	20.5555	39.928	17.0006	17.3271	26.7456	20.0056	26.0787	30.5031	7	28129465	28164811	+	protein_coding	9530053A07Rik
ENSMUSG00000097858	18.0766	-0.805293	0.200941	-4.00762	6.13e-05	0.000625107	3	142882494	142892921	+	lncRNA	9530052C20Rik	ENSMUSG00000097858	17.5021	22.0458	23.8049	31.7801	37.8153	19.8951	34.2307	14.5558	14.2664	28.7236	9.46732	15.4467	3.91533	19.2756	8.09555	16.0436	15.6784	8.4234	5.70472	14.8605	3	142882494	142892921	+	lncRNA	9530052C20Rik
ENSMUSG00000097654	10.2169	-0.805087	0.21789	-3.69493	0.000219948	0.00178186	8	24422403	24440008	+	lncRNA	Gm26714	ENSMUSG00000097654	10.0012	12.2477	12.9845	18.6297	6.30255	25.6979	23.5336	10.5861	6.48472	14.8937	8.2839	9.37835	9.78832	4.13048	5.66688	3.20872	5.53356	7.37048	5.70472	3.91065	8	24422403	24440008	+	lncRNA	Gm26714
ENSMUSG00000045259	515.352	-0.804301	0.126297	-6.36832	1.91e-10	2.27e-08	1	171358445	171360798	-	protein_coding	Klhdc9	ENSMUSG00000045259	556.317	400.5	902.422	675.054	802.525	794.148	776.609	480.342	482.463	793.623	320.705	347.551	424.813	444.715	301.154	293.919	349.537	339.042	475.122	346.484	1	171358445	171360798	-	protein_coding	Klhdc9
ENSMUSG00000114419	36.8997	-0.804026	0.148711	-5.40662	6.42e-08	2.42e-06	14	16271088	16271838	+	lncRNA	5430414B19Rik	ENSMUSG00000114419	37.5045	36.7431	47.6098	47.1223	53.5717	65.4882	41.7187	71.4559	41.5022	38.2982	30.7688	22.0667	18.5978	27.5365	25.9058	32.0872	28.5901	18.9527	21.189	31.2852	14	16271088	16271838	+	lncRNA	5430414B19Rik
ENSMUSG00000086342	31.3158	-0.803893	0.163599	-4.91381	8.93e-07	2.03e-05	4	125082856	125084947	-	lncRNA	Gm12932	ENSMUSG00000086342	21.2526	28.1697	32.4612	52.6016	49.37	42.2772	56.6946	38.3745	36.3145	54.2557	20.118	25.9284	23.492	22.0292	17.0006	26.9532	23.0565	17.8997	13.0394	25.0282	4	125082856	125084947	-	lncRNA	Gm12932
ENSMUSG00000000686	67.9064	-0.803678	0.167315	-4.80338	1.56e-06	3.2e-05	11	77515120	77538607	+	protein_coding	Abhd15	ENSMUSG00000000686	62.5075	47.766	55.1841	106.299	107.143	71.2909	103.762	74.1024	141.367	124.469	48.52	33.6517	61.6664	55.073	43.716	60.9656	35.9682	28.429	39.933	56.3134	11	77515120	77538607	+	protein_coding	Abhd15
ENSMUSG00000117768	58.5615	-0.802173	0.144422	-5.55438	2.79e-08	1.29e-06	19	53390788	53391795	+	lncRNA	8030456M14Rik	ENSMUSG00000117768	61.2574	63.688	69.2506	84.3817	96.6391	105.278	100.553	52.9303	67.4411	59.5749	28.4019	37.5134	25.4496	45.4353	43.716	37.2211	47.0353	48.4346	39.933	57.0955	19	53390788	53391795	+	lncRNA	8030456M14Rik
ENSMUSG00000028211	2153.3	-0.802046	0.120189	-6.67321	2.5e-11	4.26e-09	4	11156430	11174379	+	protein_coding	Trp53inp1	ENSMUSG00000028211	1796.47	2056.39	1967.15	3330.34	2480.05	3356.48	3116.06	2719.29	3696.29	3275.56	1073.36	1711.27	1601.37	1628.79	1568.11	1608.85	1613.03	1197.18	1358.54	1911.53	4	11156430	11174379	+	protein_coding	Trp53inp1
ENSMUSG00000112739	39.0379	-0.802026	0.17126	-4.68309	2.83e-06	5.2e-05	10	53498442	53518989	-	lncRNA	Gm20597	ENSMUSG00000112739	62.5075	39.1926	66.0045	55.8892	69.3281	57.1985	49.2066	26.4651	46.69	42.5535	31.9522	42.4784	36.2168	20.6524	19.4293	16.0436	14.7562	31.5878	24.4488	28.1567	10	53498442	53518989	-	lncRNA	Gm20597
ENSMUSG00000091007	11.1143	-0.800556	0.211505	-3.78504	0.000153682	0.0013278	12	36381241	36382181	-	lncRNA	D630036H23Rik	ENSMUSG00000091007	21.2526	15.922	6.49224	12.0545	17.8572	17.4082	20.3245	9.2628	6.48472	24.4683	5.91707	6.62001	5.87299	9.63778	3.23822	6.41744	6.45583	10.5293	10.5945	5.47491	12	36381241	36382181	-	lncRNA	D630036H23Rik
ENSMUSG00000024903	37.6762	-0.800329	0.22783	-3.51284	0.000443342	0.00313511	4	118961577	118968912	+	protein_coding	Lao1	ENSMUSG00000024903	17.5021	56.3394	34.6253	56.9851	54.6221	94.5019	70.6008	48.9605	33.7206	70.2133	4.73366	46.3401	23.492	30.2902	11.3338	6.41744	45.1908	4.2117	10.5945	32.8495	4	118961577	118968912	+	protein_coding	Lao1
ENSMUSG00000074604	30.4837	-0.800309	0.206581	-3.87407	0.000107033	0.000987136	3	51660359	51682677	+	protein_coding	Mgst2	ENSMUSG00000074604	28.7535	19.5963	63.8404	55.8892	44.1179	40.6192	39.5792	25.1419	49.2839	45.745	23.6683	16.55	29.3649	38.5511	9.71466	10.2679	19.3675	11.5822	31.7834	6.25704	3	51660359	51682677	+	protein_coding	Mgst2
ENSMUSG00000050335	81.2224	-0.800197	0.225425	-3.54973	0.00038562	0.00280725	14	47367750	47386160	+	protein_coding	Lgals3	ENSMUSG00000050335	68.7583	57.5642	82.2351	84.3817	129.202	172.425	160.456	88.6582	197.136	107.448	42.6029	37.5134	103.756	61.9572	12.1433	32.7289	24.901	35.7995	107.575	17.2069	14	47367750	47386160	+	protein_coding	Lgals3
ENSMUSG00000045231	40.8559	-0.800157	0.180513	-4.43268	9.31e-06	0.000135631	16	23220655	23225484	-	lncRNA	BC106179	ENSMUSG00000045231	28.7535	33.0688	42.1996	32.876	81.9332	64.6592	88.7859	52.9303	51.8778	65.958	16.5678	23.7217	26.4285	19.2756	28.3344	27.595	29.5123	21.0585	44.8228	36.7601	16	23220655	23225484	-	lncRNA	BC106179
ENSMUSG00000095276	201.984	-0.799814	0.176382	-4.53455	5.77e-06	9.23e-05	7	45176348	45179569	-	protein_coding	Gfy	ENSMUSG00000095276	191.273	155.546	208.834	347.39	247.9	285.164	448.208	265.975	163.415	356.386	108.874	120.264	169.338	181.741	98.7657	54.5482	155.862	109.504	232.264	138.437	7	45176348	45179569	-	protein_coding	Gfy
ENSMUSG00000068697	5.80337	-0.799672	0.230953	-3.46248	0.000535213	0.00365723	14	20649106	20656540	-	protein_coding	Myoz1	ENSMUSG00000068697	2.5003	1.22477	24.8869	10.9587	17.8572	4.97378	7.48797	7.93954	6.48472	8.5107	0	5.51668	0.978832	2.75365	0	3.85046	3.68904	0	4.88976	1.56426	14	20649106	20656540	-	protein_coding	Myoz1
ENSMUSG00000117959	128.823	-0.79919	0.133782	-5.97384	2.32e-09	1.68e-07	19	5388335	5389601	+	lncRNA	D330050I16Rik	ENSMUSG00000117959	116.264	97.9816	121.189	177.53	189.077	220.504	202.175	201.135	168.603	175.533	87.5727	112.54	118.439	68.8413	77.7173	106.529	101.449	81.0752	72.5314	79.7773	19	5388335	5389601	+	lncRNA	D330050I16Rik
ENSMUSG00000078945	80.9057	-0.798327	0.187721	-4.25273	2.11e-05	0.000261073	13	100144062	100202092	-	protein_coding	Naip2	ENSMUSG00000078945	47.5057	82.0595	132.009	75.6148	114.496	138.437	118.738	54.2535	180.275	134.044	91.1229	31.4451	62.6452	49.5657	48.5733	41.0716	28.5901	41.0641	66.8267	79.7773	13	100144062	100202092	-	protein_coding	Naip2
ENSMUSG00000019762	49.6011	-0.797176	0.183996	-4.33257	1.47e-05	0.000196294	10	3540239	3554877	+	protein_coding	Iyd	ENSMUSG00000019762	45.0054	41.6422	42.1996	104.107	68.2777	105.278	66.322	41.021	68.7381	74.4687	36.6858	41.3751	49.9204	49.5657	15.3815	26.3115	35.9682	24.2173	19.559	35.978	10	3540239	3554877	+	protein_coding	Iyd
ENSMUSG00000074001	855.754	-0.796132	0.137841	-5.77574	7.66e-09	4.38e-07	9	121777606	121783818	+	protein_coding	Klhl40	ENSMUSG00000074001	806.347	567.068	865.632	1355.59	1371.86	1236.81	1361.74	1294.15	898.783	1334.05	439.047	693.447	809.494	673.268	506.781	515.32	461.13	501.192	754.653	668.721	9	121777606	121783818	+	protein_coding	Klhl40
ENSMUSG00000084769	14.5183	-0.796125	0.214446	-3.71247	0.000205247	0.00168233	11	23894559	23895488	+	lncRNA	Gm12061	ENSMUSG00000084769	20.0024	3.67431	25.969	15.3421	18.9077	29.0137	16.0456	23.8186	15.5633	30.8513	10.6507	9.37835	14.6825	12.3914	8.9051	8.98441	2.76678	5.26463	4.0748	14.0783	11	23894559	23895488	+	lncRNA	Gm12061
ENSMUSG00000107655	77.0941	-0.796066	0.12784	-6.22706	4.75e-10	4.76e-08	6	93241719	93244206	+	TEC	Gm44220	ENSMUSG00000107655	88.7607	112.679	95.2196	101.916	127.101	122.687	112.319	95.2745	62.2534	78.724	35.5024	59.5801	46.9839	57.8267	50.1924	64.1744	46.113	58.9638	50.5275	75.0845	6	93241719	93244206	+	TEC	Gm44220
ENSMUSG00000088984	19.9373	-0.795755	0.196687	-4.0458	5.21e-05	0.000549544	4	126860979	126861112	-	snoRNA	Gm25604	ENSMUSG00000088984	20.0024	12.2477	18.3947	24.1091	23.1094	44.7641	23.5336	30.4349	33.7206	38.2982	10.6507	13.7917	19.5766	4.13048	12.1433	13.4766	16.6007	13.688	6.51968	19.5533	4	126860979	126861112	-	snoRNA	Gm25604
ENSMUSG00000032103	35.5188	-0.795302	0.189459	-4.19774	2.7e-05	0.000320861	9	35558594	35567401	+	protein_coding	Pus3	ENSMUSG00000032103	40.0048	25.7202	41.1175	53.6975	45.1683	72.9488	65.2523	54.2535	11.6725	63.8303	23.6683	29.7901	29.3649	20.6524	11.3338	27.595	22.1343	25.2702	18.7441	28.1567	9	35558594	35567401	+	protein_coding	Pus3
ENSMUSG00000061742	99.4942	-0.794371	0.155055	-5.12317	3e-07	8.45e-06	19	6535844	6543032	-	protein_coding	Slc22a12	ENSMUSG00000061742	63.7577	73.4862	109.286	111.778	158.614	190.662	144.411	121.74	158.227	164.895	71.0049	86.6119	88.0948	79.8559	47.7637	57.7569	69.1696	56.858	53.7873	82.1237	19	6535844	6543032	-	protein_coding	Slc22a12
ENSMUSG00000117420	4.80553	-0.794344	0.233182	-3.40654	0.000657916	0.00433652	17	25531436	25533045	-	lncRNA	Gm50025	ENSMUSG00000117420	7.50091	2.44954	16.2306	6.5752	7.35298	12.4345	0	3.96977	7.78167	9.57454	2.36683	2.20667	0	2.75365	2.42866	3.20872	0	2.10585	3.25984	3.91065	17	25531436	25533045	-	lncRNA	Gm50025
ENSMUSG00000034837	21.3366	-0.794238	0.206498	-3.84622	0.000119953	0.00108266	9	107674473	107679712	-	protein_coding	Gnat1	ENSMUSG00000034837	43.7553	22.0458	19.4767	41.6429	37.8153	40.6192	17.1153	19.8489	20.7511	25.5321	27.2185	8.27502	17.619	11.0146	6.47644	10.2679	20.2897	4.2117	17.1142	15.6426	9	107674473	107679712	-	protein_coding	Gnat1
ENSMUSG00000112830	139.266	-0.793502	0.198266	-4.00221	6.28e-05	0.000637244	12	80190159	80191428	-	lncRNA	Gm47765	ENSMUSG00000112830	128.766	29.3945	155.814	246.57	243.699	322.467	202.175	202.458	118.022	223.406	61.5376	143.434	130.185	119.784	62.3357	87.2771	86.6925	81.0752	83.1259	57.0955	12	80190159	80191428	-	lncRNA	Gm47765
ENSMUSG00000082031	5.67645	-0.793173	0.231381	-3.42799	0.000608067	0.00406444	X	140445553	140446382	-	processed_pseudogene	Gm8097	ENSMUSG00000082031	2.5003	2.44954	11.9024	17.5339	14.706	3.31586	17.1153	2.64651	10.3756	6.38303	4.73366	0.551668	4.89416	2.75365	0.809555	2.56697	6.45583	1.05293	0	0.78213	X	140445553	140446382	-	processed_pseudogene	Gm8097
ENSMUSG00000068699	329.138	-0.793169	0.152925	-5.18666	2.14e-07	6.48e-06	6	29433255	29461883	+	protein_coding	Flnc	ENSMUSG00000068699	227.527	275.573	409.011	306.843	698.533	498.207	478.16	435.352	555.092	404.258	188.163	219.564	350.422	275.365	223.437	249.638	142.028	193.738	266.492	185.365	6	29433255	29461883	+	protein_coding	Flnc
ENSMUSG00000043157	72.6578	-0.79274	0.167118	-4.74358	2.1e-06	4.06e-05	14	61309752	61311936	+	protein_coding	Arl11	ENSMUSG00000043157	46.2556	82.0595	108.204	111.778	108.194	99.4757	115.529	71.4559	112.834	95.7454	63.9044	52.4084	81.243	60.5803	21.0484	39.1464	33.2014	41.0641	66.0117	43.0172	14	61309752	61311936	+	protein_coding	Arl11
ENSMUSG00000005864	70.0198	-0.792233	0.204616	-3.87181	0.000108031	0.000995134	X	71991848	72010218	+	protein_coding	Cnga2	ENSMUSG00000005864	45.0054	31.844	38.9535	141.367	135.505	140.095	114.459	107.184	68.7381	123.405	27.2185	54.0635	65.5817	83.9864	25.9058	32.7289	30.4346	57.9109	42.3779	33.6316	X	71991848	72010218	+	protein_coding	Cnga2
ENSMUSG00000085351	21.4289	-0.791375	0.206932	-3.82433	0.000131128	0.00116484	4	43588071	43608755	+	lncRNA	Gm12472	ENSMUSG00000085351	17.5021	12.2477	21.6408	27.3967	44.1179	46.422	19.2548	41.021	29.8297	32.979	14.201	20.9634	20.5555	4.13048	5.66688	17.3271	8.30035	11.5822	14.6693	18.7711	4	43588071	43608755	+	lncRNA	Gm12472
ENSMUSG00000086283	12.325	-0.791005	0.227241	-3.48092	0.0004997	0.00345517	11	102619795	102624416	-	lncRNA	2810433D01Rik	ENSMUSG00000086283	10.0012	19.5963	18.3947	25.2049	12.6051	6.63171	14.9759	26.4651	18.1572	23.4044	13.0176	6.62001	1.95766	8.26096	3.23822	16.6853	1.84452	8.4234	1.62992	9.38556	11	102619795	102624416	-	lncRNA	2810433D01Rik
ENSMUSG00000055653	484.708	-0.790936	0.120167	-6.58195	4.64e-11	7.04e-09	X	52272425	52613950	-	protein_coding	Gpc3	ENSMUSG00000055653	595.072	406.623	748.772	631.219	566.179	780.884	595.828	606.052	651.066	658.516	389.343	478.848	232.962	239.568	308.44	298.411	286.823	408.535	387.106	423.915	X	52272425	52613950	-	protein_coding	Gpc3
ENSMUSG00000113746	32.2708	-0.790204	0.168483	-4.6901	2.73e-06	5.06e-05	12	82168849	82169105	-	lncRNA	Gm48242	ENSMUSG00000113746	42.5051	33.0688	44.3637	38.3553	48.3196	49.7378	38.5095	38.3745	29.8297	58.5111	10.6507	19.3084	37.1956	35.7975	26.7153	16.6853	23.9788	12.6351	24.4488	16.4247	12	82168849	82169105	-	lncRNA	Gm48242
ENSMUSG00000057054	258.056	-0.789071	0.121262	-6.50716	7.66e-11	1.09e-08	11	70688360	70700155	-	protein_coding	Inca1	ENSMUSG00000057054	205.025	208.211	315.956	364.924	404.414	386.297	419.326	377.128	263.28	373.407	172.779	210.185	228.068	205.147	151.387	147.601	175.23	166.362	194.775	191.622	11	70688360	70700155	-	protein_coding	Inca1
ENSMUSG00000111472	3.23631	-0.787975	0.229489	-3.43361	0.000595598	0.00399328	9	105085919	105087030	+	processed_pseudogene	Gm47103	ENSMUSG00000111472	10.0012	7.34862	4.32816	3.2876	5.25213	5.80275	2.13942	2.64651	10.3756	1.06384	4.73366	2.20667	0	0	0	1.28349	1.84452	0	1.62992	0.78213	9	105085919	105087030	+	processed_pseudogene	Gm47103
ENSMUSG00000097403	43.3024	-0.787806	0.186701	-4.21961	2.45e-05	0.000295859	1	136411915	136415519	-	lncRNA	9230116N13Rik	ENSMUSG00000097403	32.5039	20.8211	37.8714	84.3817	91.387	82.8964	67.3917	42.3442	70.035	44.6812	16.5678	25.9284	38.1744	31.667	38.0491	19.8941	30.4346	29.4819	32.5984	28.9388	1	136411915	136415519	-	lncRNA	9230116N13Rik
ENSMUSG00000114143	3.20762	-0.787535	0.230075	-3.42294	0.000619467	0.00412444	13	53776626	53778973	+	lncRNA	Gm48548	ENSMUSG00000114143	2.5003	4.89908	5.4102	2.19173	3.15128	7.46068	4.27884	9.2628	2.59389	9.57454	0	0	0.978832	0	0	2.56697	1.84452	4.2117	2.44488	0.78213	13	53776626	53778973	+	lncRNA	Gm48548
ENSMUSG00000112150	140.961	-0.786615	0.171912	-4.57569	4.75e-06	7.88e-05	12	77236064	77238663	-	lncRNA	9530018F02Rik	ENSMUSG00000112150	183.772	69.8119	175.291	265.2	267.858	155.016	240.685	150.851	153.039	189.363	89.9395	131.297	128.227	133.552	57.4784	48.7725	75.6254	91.6045	113.279	98.5484	12	77236064	77238663	-	lncRNA	9530018F02Rik
ENSMUSG00000097845	13.4739	-0.785193	0.233477	-3.36305	0.000770864	0.00492694	1	191025349	191029781	+	lncRNA	A230020J21Rik	ENSMUSG00000097845	6.25075	9.79816	8.65632	28.4925	44.1179	38.1324	27.8124	6.61629	11.6725	19.1491	2.36683	11.0334	20.5555	11.0146	6.47644	7.05918	2.76678	1.05293	4.88976	1.56426	1	191025349	191029781	+	lncRNA	A230020J21Rik
ENSMUSG00000114638	32.3161	-0.785188	0.1647	-4.76739	1.87e-06	3.69e-05	13	38527402	38532920	+	lncRNA	Gm31834	ENSMUSG00000114638	40.0048	19.5963	37.8714	43.8347	57.7734	52.2247	33.161	30.4349	46.69	60.6388	15.3844	18.7567	25.4496	24.7829	26.7153	24.3863	14.7562	21.0585	29.3386	23.4639	13	38527402	38532920	+	lncRNA	Gm31834
ENSMUSG00000072980	62.1885	-0.78507	0.144183	-5.44494	5.18e-08	2.05e-06	2	119609511	119618469	-	protein_coding	Oip5	ENSMUSG00000072980	67.5081	44.0917	69.2506	96.4363	89.2862	94.5019	102.692	91.3047	68.7381	81.9155	48.52	59.0285	50.8992	35.7975	39.6682	36.5794	39.6572	44.2229	57.8621	25.8103	2	119609511	119618469	-	protein_coding	Oip5
ENSMUSG00000117175	3.85134	-0.784537	0.229701	-3.41548	0.000636705	0.00422087	17	51882726	51965257	+	lncRNA	Gm20098	ENSMUSG00000117175	2.5003	8.57339	8.65632	8.76693	6.30255	3.31586	6.41826	9.2628	0	7.44687	0	0.551668	0	4.13048	0	1.28349	0	4.2117	3.25984	2.34639	17	51882726	51965257	+	lncRNA	Gm20098
ENSMUSG00000101476	13.5579	-0.784249	0.228972	-3.42509	0.000614606	0.00409831	1	13376069	13388413	+	lncRNA	Gm29570	ENSMUSG00000101476	12.5015	1.22477	20.5588	28.4925	33.6136	19.0662	19.2548	17.2023	10.3756	30.8513	4.73366	10.4817	15.6613	12.3914	8.09555	10.9096	2.76678	7.37048	3.25984	2.34639	1	13376069	13388413	+	lncRNA	Gm29570
ENSMUSG00000085006	11.7637	-0.784137	0.223813	-3.50353	0.000459133	0.00321697	3	94661829	94670696	-	transcribed_unprocessed_pseudogene	BC021767	ENSMUSG00000085006	7.50091	4.89908	18.3947	23.0132	19.9581	16.5793	28.8822	19.8489	19.4542	6.38303	3.55024	10.4817	8.80948	8.26096	0.809555	5.13395	10.1449	6.31755	10.5945	6.25704	3	94661829	94670696	-	transcribed_unprocessed_pseudogene	BC021767
ENSMUSG00000118454	2.63531	-0.78389	0.230707	-3.39777	0.000679382	0.00444514	7	35238790	35275533	-	protein_coding	Wdr88	ENSMUSG00000118454	3.75045	2.44954	2.16408	5.47933	6.30255	4.14482	2.13942	3.96977	5.18778	6.38303	2.36683	2.20667	1.95766	0	0	1.28349	0	2.10585	0.81496	0	7	35238790	35275533	-	protein_coding	Wdr88
ENSMUSG00000022146	609.341	-0.783474	0.151807	-5.16099	2.46e-07	7.18e-06	15	6813576	6874969	-	protein_coding	Osmr	ENSMUSG00000022146	385.046	693.219	468.524	662.999	1210.09	1275.78	777.679	570.324	1044.04	827.666	394.077	441.886	507.035	465.367	429.874	503.127	332.014	343.254	484.086	370.73	15	6813576	6874969	-	protein_coding	Osmr
ENSMUSG00000110442	46.1554	-0.782773	0.147373	-5.31152	1.09e-07	3.71e-06	8	94273425	94276860	+	TEC	Gm45804	ENSMUSG00000110442	40.0048	36.7431	49.7739	56.9851	73.5298	67.1461	67.3917	93.9513	62.2534	52.1281	34.319	40.2718	24.4708	24.7829	30.7631	27.595	38.735	29.4819	39.933	32.8495	8	94273425	94276860	+	TEC	Gm45804
ENSMUSG00000117296	10.4987	-0.78251	0.230216	-3.39902	0.000676277	0.00442577	17	66193351	66199820	+	lncRNA	Gm20742	ENSMUSG00000117296	8.75106	1.22477	4.32816	27.3967	15.7564	30.6717	19.2548	19.8489	14.2664	25.5321	0	6.62001	3.91533	0	4.85733	1.28349	0	13.688	1.62992	10.9498	17	66193351	66199820	+	lncRNA	Gm20742
ENSMUSG00000083796	18.5468	-0.781291	0.213788	-3.65451	0.000257671	0.00202172	2	24993356	24994343	-	processed_pseudogene	Gm13369	ENSMUSG00000083796	8.75106	13.4725	16.2306	48.2181	25.2102	43.9351	22.4639	22.4954	23.345	29.7875	7.10049	17.1017	18.5978	13.7683	12.9529	8.98441	10.1449	2.10585	11.4094	14.8605	2	24993356	24994343	-	processed_pseudogene	Gm13369
ENSMUSG00000102722	26.6956	-0.781221	0.178069	-4.38717	1.15e-05	0.000160605	1	134454491	134455473	-	TEC	Gm37935	ENSMUSG00000102722	15.0018	29.3945	24.8869	53.6975	42.017	34.8165	48.1369	29.1117	25.9389	47.8727	15.3844	15.4467	25.4496	16.5219	17.8102	12.8349	15.6784	16.8468	22.8189	24.246	1	134454491	134455473	-	TEC	Gm37935
ENSMUSG00000026621	12.3871	-0.781162	0.220189	-3.54769	0.000388623	0.00282274	1	184786766	184811313	-	protein_coding	2001-03-01	ENSMUSG00000026621	8.75106	12.2477	15.1486	9.8628	24.1598	12.4345	18.1851	19.8489	38.9083	11.7022	9.46732	7.72335	9.78832	13.7683	8.09555	10.9096	4.6113	7.37048	1.62992	3.12852	1	184786766	184811313	-	protein_coding	2001-03-01
ENSMUSG00000053185	4.54054	-0.780347	0.232238	-3.36011	0.000779113	0.00497447	1	30718559	30719962	-	lncRNA	Gm9898	ENSMUSG00000053185	2.5003	4.89908	5.4102	10.9587	3.15128	7.46068	5.34855	10.5861	7.78167	8.5107	1.18341	1.655	1.95766	1.37683	3.23822	2.56697	5.53356	1.05293	4.0748	1.56426	1	30718559	30719962	-	lncRNA	Gm9898
ENSMUSG00000104719	10.4481	-0.7803	0.224553	-3.4749	0.000511035	0.00351869	5	121847666	121848844	-	TEC	4933437G19Rik	ENSMUSG00000104719	12.5015	7.34862	19.4767	15.3421	13.6555	14.9214	25.673	10.5861	2.59389	24.4683	7.10049	11.0334	9.78832	5.5073	3.23822	7.05918	3.68904	5.26463	8.1496	1.56426	5	121847666	121848844	-	TEC	4933437G19Rik
ENSMUSG00000113453	2.89001	-0.780038	0.225075	-3.46568	0.000528893	0.00362131	13	63621499	63627379	-	lncRNA	Gm30709	ENSMUSG00000113453	2.5003	2.44954	4.32816	3.2876	5.25213	9.11861	8.55767	5.29303	1.29694	6.38303	0	3.31001	2.93649	0	0	0.641744	0	0	2.44488	0	13	63621499	63627379	-	lncRNA	Gm30709
ENSMUSG00000046748	15.0362	-0.779451	0.233303	-3.34094	0.000834953	0.00526735	16	57036966	57071372	-	protein_coding	Tmem45a2	ENSMUSG00000046748	12.5015	7.34862	23.8049	53.6975	18.9077	27.3558	19.2548	26.4651	10.3756	22.3406	11.8341	19.86	1.95766	19.2756	1.61911	1.28349	1.84452	4.2117	8.96456	7.8213	16	57036966	57071372	-	protein_coding	Tmem45a2
ENSMUSG00000111765	10.9116	-0.779299	0.231592	-3.36497	0.000765529	0.00489999	9	79444036	79519302	-	lncRNA	Gm10635	ENSMUSG00000111765	5.0006	2.44954	30.2971	8.76693	12.6051	6.63171	8.55767	68.8094	7.78167	19.1491	2.36683	2.20667	3.91533	13.7683	3.23822	2.56697	0.922261	10.5293	1.62992	66.4811	9	79444036	79519302	-	lncRNA	Gm10635
ENSMUSG00000104241	152.694	-0.77904	0.211084	-3.69066	0.000223677	0.00180538	3	51402843	51403162	-	processed_pseudogene	Gm9442	ENSMUSG00000104241	177.521	140.848	257.526	236.707	248.951	261.953	102.692	187.903	217.887	246.81	75.7385	157.225	165.423	130.798	34.0013	39.1464	68.2473	37.9053	152.397	114.191	3	51402843	51403162	-	processed_pseudogene	Gm9442
ENSMUSG00000097093	161.958	-0.778408	0.137669	-5.65419	1.57e-08	7.88e-07	15	100614136	100615110	-	lncRNA	C330013E15Rik	ENSMUSG00000097093	168.77	138.399	169.88	305.747	224.791	261.124	241.754	166.73	137.476	271.279	114.791	113.092	138.994	121.161	69.6217	97.545	138.339	120.033	123.874	115.755	15	100614136	100615110	-	lncRNA	C330013E15Rik
ENSMUSG00000033227	137.669	-0.77788	0.148708	-5.23091	1.69e-07	5.37e-06	1	74771891	74785322	+	protein_coding	Wnt6	ENSMUSG00000033227	200.024	133.5	261.854	164.38	153.362	211.386	170.084	201.135	145.258	145.746	78.1054	120.264	87.116	52.3194	132.767	105.246	55.3356	114.769	140.173	80.5594	1	74771891	74785322	+	protein_coding	Wnt6
ENSMUSG00000115451	16.524	-0.777863	0.191601	-4.0598	4.91e-05	0.00052337	14	34668030	34668339	-	lncRNA	Gm49025	ENSMUSG00000115451	15.0018	15.922	16.2306	23.0132	23.1094	20.7241	37.4398	22.4954	22.0481	22.3406	9.46732	7.72335	11.746	17.8987	4.04777	13.4766	17.523	9.47633	11.4094	9.38556	14	34668030	34668339	-	lncRNA	Gm49025
ENSMUSG00000036557	10.5155	-0.777583	0.230752	-3.36978	0.000752272	0.00483027	17	87389570	87427741	-	protein_coding	Stpg4	ENSMUSG00000036557	10.0012	13.4725	19.4767	21.9173	8.4034	8.28964	14.9759	18.5256	10.3756	25.5321	3.55024	6.62001	22.5131	5.5073	2.42866	1.92523	8.30035	2.10585	3.25984	3.12852	17	87389570	87427741	-	protein_coding	Stpg4
ENSMUSG00000030838	20.9036	-0.777281	0.23308	-3.33482	0.000853549	0.00535271	7	46195349	46238503	-	protein_coding	Ush1c	ENSMUSG00000030838	16.252	15.922	27.051	27.3967	126.051	5.80275	13.9062	30.4349	35.0175	21.2768	4.73366	7.72335	46.9839	5.5073	3.23822	6.41744	6.45583	4.2117	9.77952	3.91065	7	46195349	46238503	-	protein_coding	Ush1c
ENSMUSG00000034416	51.4534	-0.777215	0.157258	-4.94229	7.72e-07	1.8e-05	8	116995678	117082449	-	protein_coding	Pkd1l2	ENSMUSG00000034416	35.0042	62.4632	41.1175	74.5189	68.2777	77.0937	100.553	56.9001	101.162	51.0642	35.5024	36.9617	39.1533	39.928	26.7153	39.1464	33.2014	42.117	42.3779	25.8103	8	116995678	117082449	-	protein_coding	Pkd1l2
ENSMUSG00000085961	54.6133	-0.776797	0.165586	-4.69121	2.72e-06	5.04e-05	4	128936004	128940195	+	lncRNA	Gm15904	ENSMUSG00000085961	48.7559	41.6422	40.0355	86.5735	93.4879	77.0937	94.1344	74.1024	60.9564	96.8093	30.7688	43.5818	47.9627	27.5365	20.2389	41.7133	29.5123	49.4875	45.6377	42.235	4	128936004	128940195	+	lncRNA	Gm15904
ENSMUSG00000097755	6.25172	-0.776315	0.230221	-3.37205	0.000746112	0.00479775	18	34751808	34758685	+	lncRNA	2010110K18Rik	ENSMUSG00000097755	7.50091	4.89908	4.32816	10.9587	8.4034	14.0924	9.62738	7.93954	11.6725	9.57454	7.10049	3.86168	3.91533	4.13048	0	5.13395	7.37809	2.10585	1.62992	0.78213	18	34751808	34758685	+	lncRNA	2010110K18Rik
ENSMUSG00000001604	17.9247	-0.776148	0.207043	-3.74872	0.000177738	0.00149811	4	136247728	136274898	+	protein_coding	Tcea3	ENSMUSG00000001604	22.5027	14.6972	33.5433	25.2049	26.2606	19.8951	19.2548	38.3745	10.3756	31.9151	24.8517	11.585	3.91533	8.26096	14.572	13.4766	5.53356	15.7939	12.2244	6.25704	4	136247728	136274898	+	protein_coding	Tcea3
ENSMUSG00000021091	2533.97	-0.775744	0.217413	-3.56807	0.000359621	0.00265127	12	104406728	104414329	+	protein_coding	Serpina3n	ENSMUSG00000021091	2050.25	2541.4	3048.11	3107.88	3900.23	3809.92	5202	1969.01	5672.84	3545.77	1242.59	1490.61	3252.66	2563.65	527.02	508.903	1308.69	1118.21	2788.79	1030.85	12	104406728	104414329	+	protein_coding	Serpina3n
ENSMUSG00000046213	20.9297	-0.775734	0.229335	-3.38254	0.000718194	0.00465577	3	107211292	107221732	-	protein_coding	Cym	ENSMUSG00000046213	21.2526	8.57339	19.4767	29.5884	37.8153	61.3433	42.7884	18.5256	18.1572	40.4258	3.55024	22.0667	20.5555	13.7683	6.47644	0.641744	20.2897	12.6351	8.1496	12.5141	3	107211292	107221732	-	protein_coding	Cym
ENSMUSG00000000303	132.09	-0.775485	0.187996	-4.12501	3.71e-05	0.000414649	8	106603350	106670246	+	protein_coding	Cdh1	ENSMUSG00000000303	192.523	199.637	212.08	110.683	121.849	129.318	183.99	191.872	199.73	210.64	120.708	91.5769	60.6876	53.6962	154.625	148.885	22.1343	104.24	76.6062	56.3134	8	106603350	106670246	+	protein_coding	Cdh1
ENSMUSG00000113088	13.3323	-0.775436	0.211147	-3.6725	0.000240191	0.00191248	12	111950516	111954152	+	lncRNA	Gm36757	ENSMUSG00000113088	17.5021	14.6972	21.6408	17.5339	31.5128	13.2634	27.8124	5.29303	12.9694	18.0852	7.10049	9.37835	17.619	13.7683	4.85733	8.98441	5.53356	6.31755	6.51968	6.25704	12	111950516	111954152	+	lncRNA	Gm36757
ENSMUSG00000110682	4.51289	-0.774776	0.23287	-3.32708	0.000877622	0.00547901	8	122760044	122763021	-	lncRNA	A530010L16Rik	ENSMUSG00000110682	0	3.67431	9.73836	7.67107	10.5043	11.6055	4.27884	7.93954	7.78167	6.38303	2.36683	4.41334	0	0	0	1.28349	2.76678	4.2117	4.0748	1.56426	8	122760044	122763021	-	lncRNA	A530010L16Rik
ENSMUSG00000085958	20.3505	-0.774624	0.212357	-3.64774	0.000264553	0.00206462	2	146259285	146267160	+	lncRNA	A930019D19Rik	ENSMUSG00000085958	16.252	35.5183	15.1486	23.0132	27.3111	33.9875	29.9519	14.5558	28.5328	53.1919	5.91707	7.17168	12.7248	2.75365	14.572	9.62615	23.9788	21.0585	11.4094	20.3354	2	146259285	146267160	+	lncRNA	A930019D19Rik
ENSMUSG00000103622	106.155	-0.774526	0.122747	-6.30994	2.79e-10	3.1e-08	9	92538800	92542869	-	TEC	Gm38391	ENSMUSG00000103622	140.017	122.477	119.024	141.367	143.908	124.345	143.341	108.507	166.009	150.001	94.6732	81.6468	101.798	82.6096	54.2402	48.1308	83.0035	49.4875	86.3857	82.1237	9	92538800	92542869	-	TEC	Gm38391
ENSMUSG00000021239	35.5371	-0.774468	0.210766	-3.67453	0.000238284	0.00190026	12	84569761	84595457	+	protein_coding	Vsx2	ENSMUSG00000021239	22.5027	15.922	51.9379	46.0264	68.2777	79.5806	79.1585	34.4047	28.5328	55.3196	14.201	36.9617	19.5766	41.3048	12.1433	9.62615	23.0565	18.9527	21.189	32.0673	12	84569761	84595457	+	protein_coding	Vsx2
ENSMUSG00000074196	21.8017	-0.774446	0.222809	-3.47582	0.000509285	0.00350822	3	144861825	144896011	-	transcribed_unprocessed_pseudogene	Clca4c-ps	ENSMUSG00000074196	32.5039	19.5963	11.9024	59.1768	24.1598	44.7641	24.6033	18.5256	41.5022	26.596	15.3844	15.4467	3.91533	16.5219	3.23822	6.41744	8.30035	12.6351	19.559	31.2852	3	144861825	144896011	-	transcribed_unprocessed_pseudogene	Clca4c-ps
ENSMUSG00000108732	52.2461	-0.774242	0.163	-4.74996	2.03e-06	3.96e-05	7	34389731	34393612	+	TEC	2310043P16Rik	ENSMUSG00000108732	46.2556	33.0688	62.7583	82.19	87.1853	75.4357	99.483	52.9303	81.7075	59.5749	21.3015	25.9284	45.0263	27.5365	46.9542	32.7289	41.5017	40.0112	49.7125	33.6316	7	34389731	34393612	+	TEC	2310043P16Rik
ENSMUSG00000025746	12.8695	-0.774155	0.222059	-3.48626	0.000489825	0.00340169	5	30013113	30019981	+	protein_coding	Il6	ENSMUSG00000025746	8.75106	9.79816	17.3126	16.438	30.4623	16.5793	14.9759	26.4651	10.3756	27.6598	7.10049	10.4817	12.7248	5.5073	0	6.41744	9.22261	10.5293	4.0748	12.5141	5	30013113	30019981	+	protein_coding	Il6
ENSMUSG00000084829	2.14175	-0.773837	0.219578	-3.5242	0.000424765	0.00302528	2	171193268	171271350	+	lncRNA	Gm14266	ENSMUSG00000084829	2.5003	0	2.16408	4.38347	5.25213	4.97378	8.55767	3.96977	1.29694	4.25535	0	1.655	0.978832	0	0	1.28349	0	0	0	1.56426	2	171193268	171271350	+	lncRNA	Gm14266
ENSMUSG00000090535	8.09848	-0.773094	0.209597	-3.68848	0.000225601	0.00181661	10	22040700	22048512	-	unprocessed_pseudogene	Gm8540	ENSMUSG00000090535	13.7517	1.22477	4.32816	31.7801	22.0589	29.0137	19.2548	9.2628	7.78167	8.5107	0	7.17168	7.83065	0	0	0	0	0	0	0	10	22040700	22048512	-	unprocessed_pseudogene	Gm8540
ENSMUSG00000028125	349.559	-0.771788	0.116929	-6.60047	4.1e-11	6.32e-09	3	122044442	122180123	+	protein_coding	Abca4	ENSMUSG00000028125	297.536	301.293	467.441	356.157	485.297	518.103	556.249	404.917	447.446	636.175	215.381	315.002	242.75	283.626	237.2	240.654	212.12	253.755	290.126	229.946	3	122044442	122180123	+	protein_coding	Abca4
ENSMUSG00000117848	14.9057	-0.771613	0.202315	-3.81392	0.000136778	0.00120524	19	45058840	45110342	+	lncRNA	Gm35867	ENSMUSG00000117848	30.0036	13.4725	11.9024	23.0132	19.9581	16.5793	19.2548	22.4954	20.7511	22.3406	16.5678	14.895	8.80948	13.7683	6.47644	5.13395	12.9117	3.15878	4.88976	11.732	19	45058840	45110342	+	lncRNA	Gm35867
ENSMUSG00000083250	10.915	-0.771586	0.206158	-3.74269	0.000182057	0.00153199	X	128058530	128061325	-	processed_pseudogene	Gm5403	ENSMUSG00000083250	12.5015	9.79816	14.0665	8.76693	21.0085	14.9214	21.3942	13.2326	15.5633	14.8937	11.8341	7.72335	11.746	8.26096	3.23822	5.13395	5.53356	4.2117	9.77952	4.69278	X	128058530	128061325	-	processed_pseudogene	Gm5403
ENSMUSG00000097877	838.323	-0.771556	0.164671	-4.68545	2.79e-06	5.14e-05	5	104109216	104119687	+	lncRNA	Gm26703	ENSMUSG00000097877	960.116	793.651	731.459	1262.44	1394.97	1209.46	1368.16	1261.06	1041.45	901.071	584.607	778.403	727.272	513.556	218.58	264.398	502.632	773.9	705.755	773.527	5	104109216	104119687	+	lncRNA	Gm26703
ENSMUSG00000114382	28.7094	-0.771519	0.178783	-4.3154	1.59e-05	0.000209367	13	93073303	93074757	+	lncRNA	Gm4814	ENSMUSG00000114382	37.5045	22.0458	38.9535	70.1355	25.2102	42.2772	26.7427	26.4651	42.7992	43.6174	24.8517	23.1701	24.4708	27.5365	19.4293	14.1184	11.9894	17.8997	13.8543	21.1175	13	93073303	93074757	+	lncRNA	Gm4814
ENSMUSG00000113553	11.507	-0.771232	0.222924	-3.45961	0.000540952	0.00369069	13	45099956	45117730	+	lncRNA	Gm40932	ENSMUSG00000113553	8.75106	12.2477	9.73836	33.9719	21.0085	13.2634	16.0456	13.2326	15.5633	15.9576	2.36683	12.1367	9.78832	15.1451	1.61911	6.41744	10.1449	3.15878	4.88976	4.69278	13	45099956	45117730	+	lncRNA	Gm40932
ENSMUSG00000093083	4.21644	-0.77092	0.224248	-3.4378	0.00058646	0.00394323	11	117085835	117085912	+	miRNA	Gm24323	ENSMUSG00000093083	8.75106	1.22477	8.65632	8.76693	5.25213	4.14482	10.6971	0	12.9694	9.57454	0	3.31001	3.91533	2.75365	0	0	0	1.05293	3.25984	0	11	117085835	117085912	+	miRNA	Gm24323
ENSMUSG00000038528	7.59304	-0.770002	0.228617	-3.36808	0.000756926	0.00485307	10	39958035	39986646	-	protein_coding	Mfsd4b5	ENSMUSG00000038528	17.5021	3.67431	4.32816	16.438	10.5043	6.63171	9.62738	13.2326	12.9694	12.7661	9.46732	1.10334	5.87299	1.37683	4.85733	4.49221	5.53356	1.05293	6.51968	3.91065	10	39958035	39986646	-	protein_coding	Mfsd4b5
ENSMUSG00000107335	14.7681	-0.769673	0.195342	-3.94013	8.14e-05	0.000787081	5	135007092	135010108	-	TEC	Gm43372	ENSMUSG00000107335	15.0018	8.57339	23.8049	17.5339	25.2102	24.8689	22.4639	15.8791	27.2358	15.9576	15.3844	11.0334	5.87299	8.26096	5.66688	10.9096	15.6784	5.26463	10.5945	10.1677	5	135007092	135010108	-	TEC	Gm43372
ENSMUSG00000087601	51.3293	-0.769253	0.190038	-4.0479	5.17e-05	0.000546151	5	66626494	66676498	-	lncRNA	Uchl1os	ENSMUSG00000087601	33.7541	30.6192	46.5277	110.683	76.6811	57.1985	104.832	54.2535	83.0045	81.9155	33.1356	43.5818	49.9204	35.7975	16.1911	19.8941	32.2791	36.8524	50.5275	28.9388	5	66626494	66676498	-	lncRNA	Uchl1os
ENSMUSG00000082766	8.60567	-0.769168	0.232958	-3.30174	0.000960857	0.00588743	3	19610367	19628677	-	protein_coding	1700064H15Rik	ENSMUSG00000082766	1.25015	3.67431	7.57428	12.0545	19.9581	18.2372	13.9062	21.1721	18.1572	15.9576	0	13.24	0.978832	9.63778	0.809555	5.13395	1.84452	2.10585	4.0748	2.34639	3	19610367	19628677	-	protein_coding	1700064H15Rik
ENSMUSG00000039672	36.9974	-0.769141	0.215717	-3.56551	0.000363148	0.00267341	16	92292388	92298129	+	protein_coding	Kcne2	ENSMUSG00000039672	23.7529	23.2706	49.7739	49.314	79.8323	43.9351	106.971	39.6977	20.7511	67.0218	18.9346	21.515	8.80948	53.6962	8.9051	21.1775	23.0565	21.0585	34.2283	24.246	16	92292388	92298129	+	protein_coding	Kcne2
ENSMUSG00000086686	8.94477	-0.769041	0.224614	-3.42383	0.000617444	0.00411365	11	45808086	45841171	+	lncRNA	F630206G17Rik	ENSMUSG00000086686	11.2514	3.67431	16.2306	7.67107	23.1094	17.4082	13.9062	5.29303	6.48472	19.1491	10.6507	3.31001	6.85182	2.75365	4.04777	7.05918	5.53356	4.2117	3.25984	7.03917	11	45808086	45841171	+	lncRNA	F630206G17Rik
ENSMUSG00000109371	10.86	-0.768513	0.233432	-3.29224	0.000993938	0.00605471	8	8727110	8853647	+	lncRNA	Gm44626	ENSMUSG00000109371	17.5021	13.4725	22.7229	21.9173	8.4034	9.94757	8.55767	6.61629	47.987	7.44687	3.55024	14.3434	3.91533	2.75365	1.61911	1.28349	16.6007	2.10585	4.88976	1.56426	8	8727110	8853647	+	lncRNA	Gm44626
ENSMUSG00000094622	21.0804	-0.768498	0.233536	-3.29071	0.000999347	0.00608403	10	81742820	81771161	-	protein_coding	Gm3055	ENSMUSG00000094622	22.5027	33.0688	46.5277	28.4925	4.2017	29.0137	39.5792	43.6675	20.7511	47.8727	8.2839	34.7551	1.95766	2.75365	7.28599	5.77569	1.84452	6.31755	4.88976	32.0673	10	81742820	81771161	-	protein_coding	Gm3055
ENSMUSG00000104970	21.531	-0.767628	0.1818	-4.22238	2.42e-05	0.000292826	5	110230607	110231201	-	lncRNA	Gm43137	ENSMUSG00000104970	17.5021	18.3715	22.7229	31.7801	36.7649	48.9089	26.7427	21.1721	31.1267	25.5321	20.118	13.7917	19.5766	16.5219	8.09555	13.4766	15.6784	17.8997	14.6693	10.1677	5	110230607	110231201	-	lncRNA	Gm43137
ENSMUSG00000045838	900.484	-0.767298	0.126389	-6.07092	1.27e-09	1.02e-07	2	118754157	118762661	-	protein_coding	Ccdc9b	ENSMUSG00000045838	913.86	734.862	1092.86	1311.75	1366.6	1181.27	1278.3	958.038	1395.51	1301.07	547.921	657.036	877.033	731.095	420.968	419.059	706.452	565.421	805.18	745.37	2	118754157	118762661	-	protein_coding	Ccdc9b
ENSMUSG00000011034	9.49597	-0.766401	0.231643	-3.30854	0.000937847	0.005775	5	33104218	33162870	+	protein_coding	Slc5a1	ENSMUSG00000011034	15.0018	7.34862	6.49224	10.9587	16.8068	22.382	16.0456	15.8791	12.9694	12.7661	0	3.31001	7.83065	9.63778	1.61911	2.56697	7.37809	0	14.6693	6.25704	5	33104218	33162870	+	protein_coding	Slc5a1
ENSMUSG00000019767	21.8438	-0.766247	0.205863	-3.72213	0.000197551	0.00163032	10	4482501	4562231	+	protein_coding	Ccdc170	ENSMUSG00000019767	10.0012	26.9449	30.2971	14.2463	50.4204	19.0662	38.5095	31.7582	35.0175	36.1705	16.5678	12.6884	13.7036	23.406	6.47644	5.77569	16.6007	14.741	21.189	13.2962	10	4482501	4562231	+	protein_coding	Ccdc170
ENSMUSG00000112161	18.6697	-0.765872	0.233425	-3.28102	0.00103433	0.00626591	10	119135163	119166385	-	lncRNA	Gm34045	ENSMUSG00000112161	10.0012	13.4725	5.4102	8.76693	122.9	29.0137	24.6033	9.2628	37.6114	19.1491	9.46732	8.82669	16.6401	23.406	3.23822	7.70092	7.37809	2.10585	8.96456	5.47491	10	119135163	119166385	-	lncRNA	Gm34045
ENSMUSG00000108896	10.0243	-0.765791	0.218411	-3.5062	0.00045456	0.00319078	18	32499499	32500432	-	processed_pseudogene	Gm20136	ENSMUSG00000108896	5.0006	4.89908	6.49224	5.47933	35.7145	14.0924	33.161	5.29303	32.4236	28.7236	0	1.10334	7.83065	12.3914	0	0	0	6.31755	0	1.56426	18	32499499	32500432	-	processed_pseudogene	Gm20136
ENSMUSG00000105674	45.2123	-0.765774	0.22012	-3.4789	0.000503481	0.00347527	3	41005514	41006437	-	TEC	Gm42437	ENSMUSG00000105674	58.7571	31.844	46.5277	67.9437	65.1264	48.0799	87.7162	63.5163	62.2534	90.4262	26.0351	49.0984	36.2168	59.2035	4.85733	2.56697	26.7456	26.3231	23.6338	27.3746	3	41005514	41006437	-	TEC	Gm42437
ENSMUSG00000032344	170.97	-0.765684	0.133913	-5.71779	1.08e-08	5.79e-07	9	78430525	78443237	-	protein_coding	Cgas	ENSMUSG00000032344	117.514	169.018	175.291	250.953	263.657	310.862	300.588	166.73	176.385	262.768	119.525	144.537	130.185	107.392	119.005	136.05	111.594	136.88	114.094	106.37	9	78430525	78443237	-	protein_coding	Cgas
ENSMUSG00000108660	22.5616	-0.765565	0.17879	-4.28193	1.85e-05	0.000235904	6	83568038	83588123	+	lncRNA	Gm21284	ENSMUSG00000108660	16.252	34.2935	29.2151	32.876	31.5128	37.3034	42.7884	26.4651	22.0481	22.3406	11.8341	20.9634	21.5343	19.2756	7.28599	12.8349	17.523	17.8997	9.77952	17.2069	6	83568038	83588123	+	lncRNA	Gm21284
ENSMUSG00000059864	44.9488	-0.765504	0.193719	-3.95163	7.76e-05	0.000757362	11	49278303	49282769	+	protein_coding	Olfr1393	ENSMUSG00000059864	26.2532	39.1926	89.8094	46.0264	49.37	81.2385	63.1129	74.1024	73.9259	54.2557	28.4019	51.8568	8.80948	30.2902	21.0484	18.6106	26.7456	47.3816	31.7834	36.7601	11	49278303	49282769	+	protein_coding	Olfr1393
ENSMUSG00000074264	1981.22	-0.765298	0.153032	-5.0009	5.71e-07	1.42e-05	3	113555709	113606699	-	protein_coding	Amy1	ENSMUSG00000074264	1526.43	1479.52	2663.98	3092.54	3240.56	3546.31	3015.51	2269.39	2225.56	2561.72	899.395	1970.56	1974.3	1949.59	932.607	906.784	1499.6	1242.45	1311.27	1316.33	3	113555709	113606699	-	protein_coding	Amy1
ENSMUSG00000086603	14.9503	-0.76474	0.202843	-3.77011	0.000163175	0.00139532	2	60125095	60125819	+	lncRNA	Gm13620	ENSMUSG00000086603	17.5021	11.0229	16.2306	19.7256	23.1094	38.1324	22.4639	9.2628	16.8603	24.4683	8.2839	9.37835	11.746	13.7683	11.3338	5.13395	10.1449	6.31755	16.2992	7.8213	2	60125095	60125819	+	lncRNA	Gm13620
ENSMUSG00000102833	7.91952	-0.764436	0.22514	-3.39538	0.000685338	0.00447837	1	155973317	155974506	+	TEC	Gm9694	ENSMUSG00000102833	8.75106	7.34862	8.65632	18.6297	18.9077	4.14482	9.62738	7.93954	14.2664	12.7661	3.55024	3.86168	10.7671	2.75365	6.47644	5.77569	6.45583	2.10585	3.25984	2.34639	1	155973317	155974506	+	TEC	Gm9694
ENSMUSG00000037020	253.217	-0.764236	0.141706	-5.3931	6.93e-08	2.56e-06	7	30240137	30280419	-	protein_coding	Wdr62	ENSMUSG00000037020	207.525	187.39	261.854	461.36	327.733	385.468	434.302	363.896	250.31	376.599	146.743	182.05	265.263	201.017	132.767	151.451	218.576	160.045	164.622	185.365	7	30240137	30280419	-	protein_coding	Wdr62
ENSMUSG00000108030	194.518	-0.764069	0.133188	-5.73676	9.65e-09	5.26e-07	6	116199407	116207993	-	lncRNA	9530062K07Rik	ENSMUSG00000108030	183.772	160.445	191.521	336.431	281.514	305.888	318.773	220.984	219.184	272.343	152.66	130.745	179.126	148.697	100.385	100.112	166.007	162.15	154.027	105.588	6	116199407	116207993	-	lncRNA	9530062K07Rik
ENSMUSG00000048489	354.485	-0.76348	0.220351	-3.46484	0.000530545	0.00362938	6	116650608	116652794	+	protein_coding	Depp1	ENSMUSG00000048489	263.782	782.628	130.927	449.305	421.221	617.578	182.92	598.112	1099.81	341.492	169.228	278.592	189.893	229.93	231.533	372.211	307.113	122.139	101.055	200.225	6	116650608	116652794	+	protein_coding	Depp1
ENSMUSG00000084748	2.89864	-0.76339	0.22283	-3.42588	0.000612802	0.00408895	18	12163437	12163556	+	snRNA	Gm25289	ENSMUSG00000084748	5.0006	0	7.57428	1.09587	4.2017	2.48689	7.48797	2.64651	5.18778	12.7661	1.18341	1.655	0.978832	1.37683	0	0	2.76678	0	0	1.56426	18	12163437	12163556	+	snRNA	Gm25289
ENSMUSG00000032028	83.3785	-0.763006	0.198551	-3.84288	0.0001216	0.00109355	9	48318005	48353454	-	protein_coding	Nxpe2	ENSMUSG00000032028	58.7571	60.0137	36.7894	162.188	153.362	157.503	142.271	88.6582	86.8953	163.831	36.6858	71.1652	84.1795	93.6242	35.6204	38.5046	58.1024	29.4819	49.7125	60.224	9	48318005	48353454	-	protein_coding	Nxpe2
ENSMUSG00000074874	8.95032	-0.762881	0.232223	-3.28513	0.00101935	0.00618617	13	60895349	60897447	-	protein_coding	Ctla2b	ENSMUSG00000074874	11.2514	4.89908	5.4102	5.47933	21.0085	24.8689	18.1851	2.64651	24.642	11.7022	1.18341	5.51668	8.80948	4.13048	8.09555	7.70092	3.68904	1.05293	3.25984	5.47491	13	60895349	60897447	-	protein_coding	Ctla2b
ENSMUSG00000027171	39.2917	-0.762457	0.184734	-4.12732	3.67e-05	0.000411107	2	104830740	104849876	-	protein_coding	Prrg4	ENSMUSG00000027171	25.003	42.8669	35.7073	32.876	71.4289	52.2247	89.8556	39.6977	72.6289	56.3834	16.5678	26.4801	29.3649	12.3914	33.1917	21.1775	35.9682	25.2702	26.0787	40.6708	2	104830740	104849876	-	protein_coding	Prrg4
ENSMUSG00000020681	1114	-0.762431	0.114197	-6.67648	2.45e-11	4.19e-09	11	105967944	105989964	+	protein_coding	Ace	ENSMUSG00000020681	950.115	987.164	1401.24	1217.51	2157.57	1569.23	1418.43	1407.95	1758.66	1336.18	807.089	764.06	830.049	826.096	857.318	1020.37	665.872	624.385	831.259	849.394	11	105967944	105989964	+	protein_coding	Ace
ENSMUSG00000056025	60.2556	-0.762344	0.19469	-3.91568	9.02e-05	0.000858826	3	144729676	144760977	-	protein_coding	Clca3a1	ENSMUSG00000056025	81.2598	34.2935	130.927	98.628	82.9836	63.0013	93.0647	62.1931	71.332	82.9794	30.7688	47.4434	26.4285	44.0584	17.8102	68.6666	27.6678	60.0167	64.3818	17.2069	3	144729676	144760977	-	protein_coding	Clca3a1
ENSMUSG00000117819	16.4885	-0.762331	0.197883	-3.85242	0.000116955	0.00105964	17	26973216	27036378	+	protein_coding	Gm50253	ENSMUSG00000117819	18.7523	7.34862	30.2971	12.0545	32.5632	24.04	25.673	22.4954	19.4542	25.5321	7.10049	9.37835	17.619	17.8987	11.3338	10.9096	8.30035	11.5822	5.70472	11.732	17	26973216	27036378	+	protein_coding	Gm50253
ENSMUSG00000092802	10.7916	-0.761602	0.233367	-3.26354	0.00110029	0.00660024	19	6563779	6563905	+	miRNA	Gm26460	ENSMUSG00000092802	7.50091	0	23.8049	17.5339	17.8572	22.382	25.673	15.8791	9.07861	19.1491	1.18341	6.06835	10.7671	5.5073	0	4.49221	13.8339	3.15878	5.70472	6.25704	19	6563779	6563905	+	miRNA	Gm26460
ENSMUSG00000013338	19.1645	-0.761536	0.216819	-3.51232	0.000444221	0.00313914	2	156019138	156052947	-	protein_coding	Fer1l4	ENSMUSG00000013338	18.7523	20.8211	19.4767	31.7801	26.2606	28.1848	37.4398	14.5558	31.1267	32.979	11.8341	11.0334	15.6613	5.5073	1.61911	3.85046	22.1343	22.1114	19.559	8.60343	2	156019138	156052947	-	protein_coding	Fer1l4
ENSMUSG00000110716	15.2401	-0.761076	0.223315	-3.40808	0.000654228	0.00431464	8	122774034	122775423	-	lncRNA	Gm39271	ENSMUSG00000110716	8.75106	3.67431	16.2306	31.7801	35.7145	36.4744	17.1153	23.8186	23.345	13.8299	16.5678	14.3434	12.7248	9.63778	10.5242	3.85046	3.68904	8.4234	5.70472	8.60343	8	122774034	122775423	-	lncRNA	Gm39271
ENSMUSG00000115127	8.85127	-0.760687	0.227761	-3.33985	0.000838247	0.00527836	15	36632768	36695665	-	lncRNA	Gm46515	ENSMUSG00000115127	1.25015	8.57339	6.49224	16.438	21.0085	16.5793	14.9759	9.2628	16.8603	12.7661	3.55024	8.27502	4.89416	11.0146	1.61911	3.85046	1.84452	4.2117	6.51968	7.03917	15	36632768	36695665	-	lncRNA	Gm46515
ENSMUSG00000028327	8.69447	-0.760565	0.233539	-3.25669	0.0011272	0.00672477	4	45848663	45887008	+	protein_coding	Stra6l	ENSMUSG00000028327	5.0006	2.44954	25.969	18.6297	14.706	9.94757	22.4639	7.93954	2.59389	19.1491	2.36683	1.10334	5.87299	5.5073	5.66688	1.28349	7.37809	2.10585	11.4094	2.34639	4	45848663	45887008	+	protein_coding	Stra6l
ENSMUSG00000112662	3.66596	-0.760555	0.223011	-3.41039	0.000648696	0.00428738	10	78121432	78138097	-	lncRNA	Gm47922	ENSMUSG00000112662	1.25015	1.22477	0	4.38347	12.6051	16.5793	3.20913	5.29303	5.18778	10.6384	2.36683	0.551668	0.978832	4.13048	1.61911	0.641744	1.84452	0	0.81496	0	10	78121432	78138097	-	lncRNA	Gm47922
ENSMUSG00000089092	5.30059	-0.758218	0.232056	-3.2674	0.00108541	0.00652889	13	64296436	64296524	-	snRNA	Gm25654	ENSMUSG00000089092	10.0012	11.0229	4.32816	4.38347	11.5547	4.14482	9.62738	9.2628	6.48472	6.38303	0	2.75834	5.87299	2.75365	0.809555	5.13395	1.84452	3.15878	5.70472	0.78213	13	64296436	64296524	-	snRNA	Gm25654
ENSMUSG00000087383	34.0747	-0.758144	0.176937	-4.28483	1.83e-05	0.000233529	4	46300006	46345515	-	lncRNA	Gm12446	ENSMUSG00000087383	36.2544	22.0458	36.7894	53.6975	55.6725	44.7641	51.346	37.0512	45.3931	63.8303	20.118	24.8251	17.619	15.1451	15.3815	43.6386	26.7456	33.6936	17.9291	19.5533	4	46300006	46345515	-	lncRNA	Gm12446
ENSMUSG00000020216	250.221	-0.757743	0.146522	-5.17154	2.32e-07	6.89e-06	10	80808495	80813498	-	protein_coding	Jsrp1	ENSMUSG00000020216	210.025	193.514	270.51	372.595	409.666	459.246	294.17	422.119	290.516	300.002	162.128	259.284	136.058	123.914	174.864	132.199	189.063	171.627	262.417	170.504	10	80808495	80813498	-	protein_coding	Jsrp1
ENSMUSG00000086166	78.3915	-0.757393	0.146689	-5.16326	2.43e-07	7.13e-06	2	180829489	180889660	-	lncRNA	Gm14342	ENSMUSG00000086166	97.5118	51.4403	97.3836	93.1487	123.95	142.582	112.319	84.6885	92.0831	111.703	31.9522	51.3051	76.3489	60.5803	41.2873	42.3551	56.2579	68.4401	66.0117	66.4811	2	180829489	180889660	-	lncRNA	Gm14342
ENSMUSG00000106492	24.5026	-0.757384	0.204633	-3.70118	0.000214601	0.00174611	5	102070217	102071782	+	lncRNA	Gm29707	ENSMUSG00000106492	22.5027	9.79816	34.6253	21.9173	44.1179	45.593	34.2307	37.0512	27.2358	52.1281	13.0176	18.7567	23.492	12.3914	15.3815	17.9688	13.8339	2.10585	22.0039	21.8996	5	102070217	102071782	+	lncRNA	Gm29707
ENSMUSG00000003484	26.3856	-0.757305	0.232522	-3.25691	0.00112631	0.0067221	8	71988481	72009626	-	protein_coding	Cyp4f18	ENSMUSG00000003484	10.0012	2.44954	29.2151	32.876	86.1349	20.7241	49.2066	41.021	80.4106	29.7875	11.8341	23.7217	27.4073	28.9133	8.09555	5.77569	9.22261	18.9527	5.70472	6.25704	8	71988481	72009626	-	protein_coding	Cyp4f18
ENSMUSG00000031825	230.931	-0.757175	0.138528	-5.46585	4.61e-08	1.89e-06	8	119992437	120052793	+	protein_coding	Crispld2	ENSMUSG00000031825	177.521	280.472	275.92	273.967	349.792	269.413	327.331	268.621	413.725	324.471	105.324	182.05	217.301	264.351	136.815	167.495	123.583	115.822	187.441	157.208	8	119992437	120052793	+	protein_coding	Crispld2
ENSMUSG00000093656	52.0641	-0.757001	0.14583	-5.19099	2.09e-07	6.38e-06	3	96267074	96270289	-	lncRNA	Gm20628	ENSMUSG00000093656	63.7577	55.1146	55.1841	48.2181	91.387	73.7778	88.7859	44.9907	73.9259	74.4687	31.9522	45.2368	43.0686	39.928	25.9058	46.8473	46.113	36.8524	25.2638	30.5031	3	96267074	96270289	-	lncRNA	Gm20628
ENSMUSG00000073650	260.04	-0.756708	0.139554	-5.42234	5.88e-08	2.27e-06	1	74362107	74369321	+	protein_coding	Catip	ENSMUSG00000073650	238.779	151.871	305.135	470.127	337.187	376.35	462.114	299.056	287.922	408.514	192.897	235.011	136.058	170.726	177.292	166.853	203.82	156.886	220.854	203.354	1	74362107	74369321	+	protein_coding	Catip
ENSMUSG00000108592	10.0597	-0.756238	0.228791	-3.30536	0.000948552	0.00582713	7	27649425	27651059	-	lncRNA	Gm38973	ENSMUSG00000108592	6.25075	2.44954	6.49224	20.8215	14.706	23.211	23.5336	19.8489	10.3756	13.8299	3.55024	4.41334	15.6613	5.5073	1.61911	5.13395	7.37809	5.26463	4.88976	6.25704	7	27649425	27651059	-	lncRNA	Gm38973
ENSMUSG00000056174	85.8012	-0.756195	0.209511	-3.60934	0.00030698	0.00233334	4	126286792	126314330	+	protein_coding	Col8a2	ENSMUSG00000056174	102.512	100.431	210.998	40.5471	161.766	39.7903	219.29	50.2838	114.131	117.022	61.5376	63.4418	35.2379	74.3486	77.7173	39.7881	18.4452	64.2284	61.9369	62.5704	4	126286792	126314330	+	protein_coding	Col8a2
ENSMUSG00000100627	80.6552	-0.755957	0.159859	-4.7289	2.26e-06	4.33e-05	1	154037596	154117951	-	lncRNA	A830008E24Rik	ENSMUSG00000100627	85.0103	64.9128	82.2351	161.092	167.018	119.371	117.668	66.1629	62.2534	117.022	56.8039	81.0952	51.8781	61.9572	51.0019	47.489	55.3356	58.9638	64.3818	41.4529	1	154037596	154117951	-	lncRNA	A830008E24Rik
ENSMUSG00000068854	428.698	-0.755927	0.103391	-7.31138	2.64e-13	9.76e-11	3	96221118	96223738	+	protein_coding	H2bc21	ENSMUSG00000068854	462.556	493.582	530.2	556.7	690.13	596.854	744.518	341.4	512.293	510.642	256.801	295.694	373.914	349.714	271.201	338.841	329.247	319.036	290.126	310.506	3	96221118	96223738	+	protein_coding	H2bc21
ENSMUSG00000115620	23.8168	-0.755858	0.174857	-4.32273	1.54e-05	0.000203577	15	38713482	38728516	-	lncRNA	Gm45924	ENSMUSG00000115620	32.5039	22.0458	22.7229	30.6843	29.4119	29.8427	22.4639	39.6977	42.7992	39.362	18.9346	11.585	23.492	12.3914	18.6198	26.9532	11.9894	16.8468	13.0394	10.9498	15	38713482	38728516	-	lncRNA	Gm45924
ENSMUSG00000045569	6.28011	-0.755643	0.22987	-3.28727	0.00101165	0.00614671	18	68406906	68429320	-	protein_coding	Mc2r	ENSMUSG00000045569	5.0006	2.44954	7.57428	8.76693	10.5043	17.4082	18.1851	2.64651	18.1572	8.5107	2.36683	5.51668	7.83065	0	0	0	3.68904	2.10585	4.88976	0	18	68406906	68429320	-	protein_coding	Mc2r
ENSMUSG00000105296	5.26809	-0.755613	0.233275	-3.23916	0.00119883	0.00705967	3	138000938	138016044	+	lncRNA	Gm19708	ENSMUSG00000105296	6.25075	3.67431	8.65632	13.1504	12.6051	4.14482	8.55767	10.5861	6.48472	3.19151	5.91707	1.10334	5.87299	0	3.23822	1.28349	1.84452	0	4.88976	3.91065	3	138000938	138016044	+	lncRNA	Gm19708
ENSMUSG00000075023	38.1599	-0.75534	0.183977	-4.10563	4.03e-05	0.000443547	2	93855360	93869157	-	protein_coding	Accsl	ENSMUSG00000075023	47.5057	20.8211	27.051	46.0264	68.2777	58.8565	79.1585	51.607	49.2839	52.1281	18.9346	27.0317	32.3014	26.1597	14.572	14.7601	34.1236	22.1114	32.5984	39.8886	2	93855360	93869157	-	protein_coding	Accsl
ENSMUSG00000117322	144.734	-0.75526	0.126837	-5.95457	2.61e-09	1.83e-07	17	23550798	23565291	+	lncRNA	6330415G19Rik	ENSMUSG00000117322	162.52	145.748	142.829	220.269	197.48	160.819	207.524	162.761	193.245	255.321	78.1054	115.85	98.862	111.523	74.479	72.517	115.283	105.293	148.323	125.923	17	23550798	23565291	+	lncRNA	6330415G19Rik
ENSMUSG00000112129	25.9582	-0.754751	0.186587	-4.04503	5.23e-05	0.000550524	10	63060161	63077962	+	protein_coding	Pbld1	ENSMUSG00000112129	30.0036	24.4954	29.2151	48.2181	47.2691	34.8165	44.9278	30.4349	23.345	28.7236	4.73366	13.24	23.492	20.6524	16.1911	14.7601	24.901	10.5293	17.9291	31.2852	10	63060161	63077962	+	protein_coding	Pbld1
ENSMUSG00000114681	16.6331	-0.754646	0.222377	-3.39355	0.000689942	0.00450173	13	47106418	47109519	+	lncRNA	1700026N04Rik	ENSMUSG00000114681	23.7529	11.0229	14.0665	38.3553	23.1094	26.5269	36.3701	21.1721	15.5633	18.0852	20.118	8.82669	8.80948	24.7829	4.04777	10.9096	3.68904	2.10585	5.70472	15.6426	13	47106418	47109519	+	lncRNA	1700026N04Rik
ENSMUSG00000041679	387.578	-0.754438	0.155709	-4.84518	1.26e-06	2.7e-05	8	105312264	105326278	-	protein_coding	Lrrc29	ENSMUSG00000041679	278.784	242.504	340.843	580.809	715.34	631.671	482.439	606.052	535.638	589.366	188.163	365.756	380.765	297.394	221.818	199.582	317.258	220.061	282.791	274.528	8	105312264	105326278	-	protein_coding	Lrrc29
ENSMUSG00000086417	22.4791	-0.754233	0.186956	-4.03427	5.48e-05	0.000571731	4	116824902	116830603	+	lncRNA	Gm12996	ENSMUSG00000086417	21.2526	18.3715	33.5433	38.3553	25.2102	44.7641	37.4398	27.7884	11.6725	36.1705	13.0176	12.6884	24.4708	13.7683	15.3815	10.2679	15.6784	10.5293	22.0039	17.2069	4	116824902	116830603	+	lncRNA	Gm12996
ENSMUSG00000021879	52.913	-0.754116	0.185844	-4.05778	4.95e-05	0.000526451	14	26693273	26891703	+	protein_coding	Dnah12	ENSMUSG00000021879	53.7565	45.3165	38.9535	53.6975	134.454	51.3958	109.11	78.0722	85.5984	44.6812	65.0878	41.3751	32.3014	37.1743	36.43	28.8785	23.9788	23.1644	32.5984	42.235	14	26693273	26891703	+	protein_coding	Dnah12
ENSMUSG00000097318	54.0403	-0.753807	0.172046	-4.38142	1.18e-05	0.000163876	16	33379853	33380727	-	lncRNA	1700007L15Rik	ENSMUSG00000097318	35.0042	47.766	69.2506	113.97	58.8238	83.7254	104.832	68.8094	40.2053	80.8517	43.7863	45.2368	52.8569	30.2902	33.1917	33.3707	46.113	20.0056	38.3031	34.4137	16	33379853	33380727	-	lncRNA	1700007L15Rik
ENSMUSG00000115003	37.5242	-0.753491	0.154559	-4.87511	1.09e-06	2.39e-05	14	46787632	46788530	+	lncRNA	Gm48933	ENSMUSG00000115003	30.0036	34.2935	49.7739	69.0396	67.2272	56.3696	49.2066	43.6675	33.7206	51.0642	24.8517	35.8584	29.3649	22.0292	20.2389	23.7445	26.7456	25.2702	22.8189	35.1959	14	46787632	46788530	+	lncRNA	Gm48933
ENSMUSG00000066363	8.59213	-0.752976	0.213189	-3.53196	0.000412485	0.00295498	12	104214543	104221129	+	protein_coding	Serpina3f	ENSMUSG00000066363	2.5003	51.4403	6.49224	0	15.7564	8.28964	11.7668	0	53.1747	2.12768	1.18341	3.86168	0	2.75365	3.23822	4.49221	1.84452	2.10585	0.81496	0	12	104214543	104221129	+	protein_coding	Serpina3f
ENSMUSG00000042857	396.41	-0.752924	0.108363	-6.94815	3.7e-12	8.79e-10	13	94355838	94358923	-	lncRNA	Gm9776	ENSMUSG00000042857	407.549	341.711	483.672	608.206	602.944	545.458	621.501	492.252	383.896	543.621	281.653	295.142	326.93	293.264	235.58	212.417	262.844	309.56	357.767	322.238	13	94355838	94358923	-	lncRNA	Gm9776
ENSMUSG00000074939	11.9632	-0.752188	0.230286	-3.26632	0.00108956	0.00654868	2	112479170	112480769	-	protein_coding	Chrm5	ENSMUSG00000074939	2.5003	9.79816	34.6253	12.0545	47.2691	10.7765	13.9062	10.5861	16.8603	11.7022	7.10049	13.24	5.87299	11.0146	4.04777	7.70092	5.53356	4.2117	7.33464	3.12852	2	112479170	112480769	-	protein_coding	Chrm5
ENSMUSG00000090174	2.83214	-0.751957	0.217938	-3.45033	0.000559909	0.00379216	8	122697859	122700160	+	lncRNA	Gm10612	ENSMUSG00000090174	1.25015	1.22477	8.65632	2.19173	11.5547	10.7765	4.27884	3.96977	0	4.25535	2.36683	1.10334	0	2.75365	1.61911	0.641744	0	0	0	0	8	122697859	122700160	+	lncRNA	Gm10612
ENSMUSG00000057191	70.0557	-0.75156	0.207014	-3.63047	0.000282903	0.00217952	9	21526175	21545333	+	protein_coding	AB124611	ENSMUSG00000057191	63.7577	50.2155	47.6098	90.9569	73.5298	127.66	91.995	52.9303	303.485	38.2982	52.0702	46.8918	50.8992	41.3048	40.4777	42.9968	35.0459	56.858	45.6377	48.4921	9	21526175	21545333	+	protein_coding	AB124611
ENSMUSG00000031070	84.8801	-0.751401	0.184076	-4.08201	4.46e-05	0.000481065	7	145300827	145309557	+	protein_coding	Mrgprf	ENSMUSG00000031070	145.018	89.4082	209.916	89.8611	91.387	102.792	115.529	112.477	41.5022	115.958	66.2712	52.9601	41.1109	35.7975	79.3364	68.0248	27.6678	90.5516	78.2361	43.7993	7	145300827	145309557	+	protein_coding	Mrgprf
ENSMUSG00000025479	10.1466	-0.751086	0.218129	-3.44331	0.000574639	0.00387821	7	140763738	140774987	+	protein_coding	Cyp2e1	ENSMUSG00000025479	12.5015	14.6972	10.8204	10.9587	18.9077	12.4345	12.8365	18.5256	9.07861	18.0852	7.10049	6.62001	15.6613	1.37683	4.04777	3.85046	10.1449	3.15878	9.77952	2.34639	7	140763738	140774987	+	protein_coding	Cyp2e1
ENSMUSG00000021187	12.4412	-0.750585	0.226194	-3.31832	0.000905595	0.00561476	12	101645442	101718523	-	protein_coding	Tc2n	ENSMUSG00000021187	8.75106	7.34862	32.4612	16.438	29.4119	13.2634	23.5336	6.61629	23.345	11.7022	4.73366	12.6884	4.89416	16.5219	1.61911	7.05918	6.45583	11.5822	5.70472	4.69278	12	101645442	101718523	-	protein_coding	Tc2n
ENSMUSG00000071893	18.139	-0.750563	0.189397	-3.96292	7.4e-05	0.000730073	6	56924014	56958100	+	protein_coding	Vmn1r4	ENSMUSG00000071893	18.7523	31.844	24.8869	27.3967	24.1598	28.1848	21.3942	29.1117	14.2664	19.1491	14.201	17.1017	21.5343	8.26096	4.85733	11.5514	11.9894	11.5822	16.2992	6.25704	6	56924014	56958100	+	protein_coding	Vmn1r4
ENSMUSG00000024650	295.313	-0.749732	0.169025	-4.43562	9.18e-06	0.000134364	19	8618038	8628299	+	protein_coding	Slc22a6	ENSMUSG00000024650	468.807	402.949	510.723	313.418	376.052	345.678	361.562	460.494	284.031	311.705	234.316	126.884	201.639	104.639	216.961	347.825	73.7809	288.501	251.823	224.471	19	8618038	8628299	+	protein_coding	Slc22a6
ENSMUSG00000105858	64.4442	-0.749431	0.158233	-4.73626	2.18e-06	4.2e-05	5	24447907	24448489	+	lncRNA	2310074N15Rik	ENSMUSG00000105858	60.0072	42.8669	67.0865	107.395	109.244	135.95	96.2738	72.7791	60.9564	75.5325	46.1532	46.3401	38.1744	63.334	45.3351	28.8785	46.113	50.5404	51.3425	44.5814	5	24447907	24448489	+	lncRNA	2310074N15Rik
ENSMUSG00000118318	2.18302	-0.748995	0.217012	-3.45139	0.000557703	0.00378307	7	24053253	24063554	+	protein_coding	Vmn1r183	ENSMUSG00000118318	2.5003	4.89908	4.32816	2.19173	6.30255	5.80275	2.13942	0	2.59389	7.44687	0	2.20667	0	0	1.61911	0	0	0	1.62992	0	7	24053253	24063554	+	protein_coding	Vmn1r183
ENSMUSG00000021790	18.1398	-0.748905	0.217599	-3.44167	0.00057813	0.00389748	14	41072910	41092197	+	protein_coding	Dydc1	ENSMUSG00000021790	31.2538	18.3715	16.2306	29.5884	15.7564	11.6055	36.3701	17.2023	42.7992	27.6598	3.55024	10.4817	13.7036	20.6524	8.9051	8.34267	25.8233	12.6351	3.25984	8.60343	14	41072910	41092197	+	protein_coding	Dydc1
ENSMUSG00000032372	66.0045	-0.748881	0.155234	-4.82421	1.41e-06	2.94e-05	9	92275601	92297752	+	protein_coding	Plscr2	ENSMUSG00000032372	61.2574	97.9816	87.6453	105.203	116.597	76.2647	66.322	62.1931	119.319	58.5111	42.6029	56.8218	52.8569	57.8267	42.9064	57.1152	18.4452	45.2758	46.4527	48.4921	9	92275601	92297752	+	protein_coding	Plscr2
ENSMUSG00000093619	11.1849	-0.748691	0.231466	-3.23456	0.00121829	0.00714582	9	107998115	108002404	-	lncRNA	4930535L15Rik	ENSMUSG00000093619	7.50091	0	18.3947	20.8215	26.2606	19.8951	19.2548	14.5558	7.78167	24.4683	7.10049	6.62001	8.80948	8.26096	3.23822	0.641744	11.0671	9.47633	4.0748	5.47491	9	107998115	108002404	-	lncRNA	4930535L15Rik
ENSMUSG00000102457	109.541	-0.748644	0.159173	-4.70335	2.56e-06	4.79e-05	1	16618559	16621539	+	TEC	Gm38342	ENSMUSG00000102457	82.51	73.4862	101.712	140.271	190.127	200.609	188.269	140.265	103.756	192.555	59.1707	87.7152	92.989	63.334	84.1937	73.8005	94.9929	91.6045	48.8976	80.5594	1	16618559	16621539	+	TEC	Gm38342
ENSMUSG00000103925	10.9735	-0.747622	0.233358	-3.20376	0.00135645	0.00778775	8	23208511	23209362	+	TEC	B230112G18Rik	ENSMUSG00000103925	13.7517	7.34862	11.9024	14.2463	34.664	14.9214	32.0913	5.29303	14.2664	11.7022	0	4.96501	5.87299	6.88413	1.61911	3.85046	3.68904	21.0585	9.77952	1.56426	8	23208511	23209362	+	TEC	B230112G18Rik
ENSMUSG00000019320	189.039	-0.747518	0.161023	-4.64232	3.45e-06	6.09e-05	17	24696233	24700529	+	protein_coding	Noxo1	ENSMUSG00000019320	118.764	100.431	239.131	311.226	324.581	310.033	317.704	220.984	190.651	307.449	105.324	168.259	197.724	136.306	136.005	105.246	121.738	121.086	121.429	126.705	17	24696233	24700529	+	protein_coding	Noxo1
ENSMUSG00000105535	5.21772	-0.747318	0.232188	-3.21859	0.00128821	0.00747771	3	34017707	34019882	-	lncRNA	Gm43077	ENSMUSG00000105535	5.0006	1.22477	5.4102	4.38347	11.5547	14.0924	10.6971	6.61629	6.48472	9.57454	2.36683	2.20667	2.93649	1.37683	2.42866	3.85046	3.68904	3.15878	6.51968	0.78213	3	34017707	34019882	-	lncRNA	Gm43077
ENSMUSG00000109737	9.79191	-0.747287	0.232188	-3.21846	0.00128881	0.00747788	11	69810964	69815298	-	protein_coding	Gm39566	ENSMUSG00000109737	7.50091	4.89908	8.65632	41.6429	10.5043	28.1848	18.1851	14.5558	11.6725	4.25535	2.36683	9.37835	13.7036	5.5073	1.61911	0	3.68904	0	3.25984	6.25704	11	69810964	69815298	-	protein_coding	Gm39566
ENSMUSG00000108604	45.9679	-0.74697	0.219858	-3.39751	0.00068002	0.00444836	7	128215615	128220788	-	lncRNA	Gm44850	ENSMUSG00000108604	28.7535	24.4954	56.2661	50.4099	107.143	53.0537	103.762	48.9605	47.987	107.448	11.8341	40.2718	53.8357	59.2035	9.71466	12.8349	35.0459	20.0056	15.4842	32.8495	7	128215615	128220788	-	lncRNA	Gm44850
ENSMUSG00000037095	285.073	-0.74692	0.233519	-3.19853	0.00138129	0.00790521	17	56119677	56122001	-	protein_coding	Lrg1	ENSMUSG00000037095	105.013	654.027	128.763	190.681	245.8	353.968	177.572	129.679	2055.66	196.81	94.6732	123.574	100.82	166.596	172.435	220.118	177.074	103.187	135.283	169.722	17	56119677	56122001	-	protein_coding	Lrg1
ENSMUSG00000114457	10.4623	-0.746662	0.213388	-3.49909	0.000466855	0.00326436	13	48107616	48237251	-	lncRNA	Gm36346	ENSMUSG00000114457	15.0018	8.57339	24.8869	14.2463	13.6555	10.7765	23.5336	3.96977	7.78167	18.0852	9.46732	4.41334	8.80948	5.5073	4.85733	6.41744	8.30035	7.37048	7.33464	6.25704	13	48107616	48237251	-	lncRNA	Gm36346
ENSMUSG00000074340	522.168	-0.746528	0.191824	-3.89174	9.95e-05	0.000931621	3	105973710	105987423	+	protein_coding	Ovgp1	ENSMUSG00000074340	375.045	293.945	500.985	935.87	776.264	990.612	977.714	633.84	575.844	821.283	228.399	467.263	544.23	579.644	232.342	218.835	298.812	271.655	399.33	321.456	3	105973710	105987423	+	protein_coding	Ovgp1
ENSMUSG00000117622	4.80025	-0.746522	0.231995	-3.21784	0.00129161	0.00748989	17	26232563	26232881	+	processed_pseudogene	Gm20026	ENSMUSG00000117622	5.0006	6.12385	12.9845	6.5752	3.15128	7.46068	9.62738	6.61629	9.07861	3.19151	3.55024	3.86168	3.91533	0	0.809555	4.49221	3.68904	1.05293	3.25984	1.56426	17	26232563	26232881	+	processed_pseudogene	Gm20026
ENSMUSG00000021791	45.7868	-0.746443	0.194981	-3.82827	0.000129045	0.00114966	14	41049116	41069208	-	protein_coding	Dydc2	ENSMUSG00000021791	103.763	41.6422	31.3792	44.9305	47.2691	46.422	88.7859	51.607	93.38	55.3196	14.201	33.1001	40.1321	49.5657	25.9058	21.8193	49.8021	40.0112	17.9291	18.7711	14	41049116	41069208	-	protein_coding	Dydc2
ENSMUSG00000102246	23.3807	-0.7463	0.206293	-3.61768	0.000297261	0.00227016	1	191535884	191536892	-	TEC	9430037O13Rik	ENSMUSG00000102246	18.7523	18.3715	12.9845	49.314	57.7734	38.1324	21.3942	43.6675	20.7511	31.9151	20.118	18.7567	5.87299	15.1451	10.5242	17.9688	14.7562	15.7939	10.5945	25.0282	1	191535884	191536892	-	TEC	9430037O13Rik
ENSMUSG00000091968	57.0047	-0.746184	0.173028	-4.31251	1.61e-05	0.00021158	17	32788393	32789591	+	lncRNA	Gm17115	ENSMUSG00000091968	67.5081	52.6651	43.2816	35.0677	108.194	79.5806	94.1344	47.6373	127.101	86.1709	31.9522	48.5468	42.0898	37.1743	26.7153	41.7133	46.113	52.6463	35.0433	36.7601	17	32788393	32789591	+	lncRNA	Gm17115
ENSMUSG00000036523	176.32	-0.745578	0.148768	-5.01167	5.4e-07	1.35e-05	12	16670614	16800886	-	protein_coding	Greb1	ENSMUSG00000036523	200.024	178.816	157.978	292.596	158.614	329.928	278.124	154.821	254.201	260.64	85.2058	135.71	92.0102	86.74	141.672	151.451	165.085	130.563	97.7952	174.415	12	16670614	16800886	-	protein_coding	Greb1
ENSMUSG00000018339	732.499	-0.745477	0.165556	-4.50287	6.7e-06	0.000104507	11	54902452	54910377	+	protein_coding	Gpx3	ENSMUSG00000018339	502.561	782.628	900.258	780.257	1099.8	1001.39	912.462	582.233	2287.81	630.856	449.697	718.823	541.294	543.846	571.546	413.283	496.176	491.716	468.602	474.753	11	54902452	54910377	+	protein_coding	Gpx3
ENSMUSG00000088414	2.34015	-0.745461	0.218731	-3.40812	0.000654126	0.00431464	8	124022640	124022722	+	miRNA	Mir1967	ENSMUSG00000088414	2.5003	2.44954	3.24612	3.2876	3.15128	7.46068	0	1.32326	7.78167	8.5107	0	1.655	0.978832	2.75365	0	0	0.922261	0	0	0.78213	8	124022640	124022722	+	miRNA	Mir1967
ENSMUSG00000000154	106.69	-0.745383	0.223852	-3.32981	0.000869063	0.00543665	7	143473735	143499334	+	protein_coding	Slc22a18	ENSMUSG00000000154	127.515	116.353	154.732	87.6693	190.127	207.241	162.596	146.882	107.646	173.406	37.8693	91.5769	89.0737	118.407	16.1911	8.98441	76.5476	46.3287	122.244	52.4027	7	143473735	143499334	+	protein_coding	Slc22a18
ENSMUSG00000100599	142.165	-0.745148	0.123044	-6.05596	1.4e-09	1.09e-07	15	99249510	99262044	+	lncRNA	1700120C14Rik	ENSMUSG00000100599	141.267	112.679	164.47	226.844	237.396	225.478	181.851	175.993	169.9	170.214	85.2058	113.092	101.798	130.798	84.1937	79.5762	104.215	92.6574	137.728	107.934	15	99249510	99262044	+	lncRNA	1700120C14Rik
ENSMUSG00000113035	3.33604	-0.745128	0.228575	-3.25989	0.00111455	0.00667139	12	69464786	69475550	-	lncRNA	5830428M24Rik	ENSMUSG00000113035	2.5003	2.44954	2.16408	8.76693	3.15128	5.80275	2.13942	5.29303	15.5633	5.31919	0	2.20667	1.95766	4.13048	2.42866	1.92523	0.922261	0	0	0	12	69464786	69475550	-	lncRNA	5830428M24Rik
ENSMUSG00000044938	19.206	-0.744613	0.219432	-3.39336	0.000690412	0.00450289	9	77636499	77660127	+	protein_coding	Klhl31	ENSMUSG00000044938	3.75045	9.79816	19.4767	21.9173	37.8153	44.7641	37.4398	27.7884	16.8603	41.4897	18.9346	17.1017	13.7036	16.5219	6.47644	5.77569	12.9117	11.5822	11.4094	8.60343	9	77636499	77660127	+	protein_coding	Klhl31
ENSMUSG00000107605	32.4823	-0.744426	0.211437	-3.52079	0.000430268	0.00305949	6	90459710	90461468	-	lncRNA	Gm44117	ENSMUSG00000107605	15.0018	25.7202	42.1996	74.5189	38.8657	48.0799	51.346	33.0814	49.2839	59.5749	5.91707	27.5834	47.9627	22.0292	14.572	11.5514	31.3569	9.47633	21.189	20.3354	6	90459710	90461468	-	lncRNA	Gm44117
ENSMUSG00000031995	75.3932	-0.744254	0.169427	-4.39278	1.12e-05	0.000157254	9	31089401	31131853	-	protein_coding	St14	ENSMUSG00000031995	45.0054	58.7889	81.153	107.395	108.194	88.6992	174.363	76.7489	110.24	124.469	61.5376	38.6168	68.5182	66.0876	38.8586	44.2803	35.0459	49.4875	71.7165	58.6598	9	31089401	31131853	-	protein_coding	St14
ENSMUSG00000070873	7.38932	-0.744217	0.227817	-3.26672	0.001088	0.00654188	7	4237753	4243463	+	protein_coding	Lilra5	ENSMUSG00000070873	11.2514	4.89908	10.8204	5.47933	14.706	4.97378	25.673	5.29303	10.3756	10.6384	4.73366	4.41334	4.89416	0	6.47644	5.13395	3.68904	6.31755	4.88976	3.12852	7	4237753	4243463	+	protein_coding	Lilra5
ENSMUSG00000070368	26.5875	-0.744209	0.214488	-3.46971	0.000521026	0.00357864	3	107232796	107239707	-	protein_coding	Prok1	ENSMUSG00000070368	23.7529	17.1468	21.6408	48.2181	53.5717	50.5668	50.2763	18.5256	46.69	28.7236	10.6507	20.4117	43.0686	19.2756	8.9051	5.77569	12.9117	14.741	22.8189	14.0783	3	107232796	107239707	-	protein_coding	Prok1
ENSMUSG00000029660	37.8902	-0.743848	0.176621	-4.21155	2.54e-05	0.000304939	5	149439659	149470979	+	protein_coding	Tex26	ENSMUSG00000029660	48.7559	24.4954	48.6918	36.1636	51.4708	40.6192	60.9734	60.8698	42.7992	76.5963	27.2185	25.9284	44.0474	34.4206	21.858	17.3271	33.2014	22.1114	28.5236	11.732	5	149439659	149470979	+	protein_coding	Tex26
ENSMUSG00000040213	406.64	-0.743826	0.0982925	-7.56748	3.81e-14	1.74e-11	3	142701050	142746870	+	protein_coding	Kyat3	ENSMUSG00000040213	358.793	476.435	492.328	474.51	503.154	595.196	649.314	394.331	664.036	529.791	311.238	340.931	317.141	297.394	239.628	253.489	332.014	291.66	305.61	305.813	3	142701050	142746870	+	protein_coding	Kyat3
ENSMUSG00000020399	401.936	-0.743678	0.117079	-6.35193	2.13e-10	2.49e-08	11	46454934	46481255	+	protein_coding	Havcr2	ENSMUSG00000020399	351.292	324.564	423.078	549.029	548.322	645.763	546.621	485.635	649.769	578.728	310.055	315.002	325.951	285.003	247.724	295.202	230.565	221.114	364.287	341.009	11	46454934	46481255	+	protein_coding	Havcr2
ENSMUSG00000026735	5.61969	-0.743677	0.232658	-3.19643	0.00139138	0.00794366	2	19445662	19447501	+	protein_coding	Ptf1a	ENSMUSG00000026735	3.75045	6.12385	2.16408	10.9587	12.6051	15.7503	7.48797	6.61629	7.78167	11.7022	2.36683	7.72335	1.95766	8.26096	0	0.641744	2.76678	2.10585	1.62992	0	2	19445662	19447501	+	protein_coding	Ptf1a
ENSMUSG00000105789	18.2619	-0.743472	0.184913	-4.02066	5.8e-05	0.000598249	3	130730459	130771643	+	lncRNA	Gm42997	ENSMUSG00000105789	17.5021	12.2477	19.4767	30.6843	26.2606	24.04	24.6033	26.4651	23.345	34.0428	15.3844	18.7567	11.746	16.5219	4.85733	9.62615	13.8339	9.47633	13.8543	12.5141	3	130730459	130771643	+	lncRNA	Gm42997
ENSMUSG00000101166	17.3771	-0.743093	0.230491	-3.22395	0.00126435	0.00736383	7	44246725	44262720	+	lncRNA	Gm28496	ENSMUSG00000101166	11.2514	14.6972	14.0665	24.1091	38.8657	25.6979	9.62738	37.0512	59.6595	12.7661	4.73366	15.9984	11.746	4.13048	1.61911	16.6853	15.6784	12.6351	2.44488	14.0783	7	44246725	44262720	+	lncRNA	Gm28496
ENSMUSG00000075437	18.1547	-0.743061	0.228087	-3.2578	0.0011228	0.0067042	11	112792730	112799008	-	lncRNA	Gm11681	ENSMUSG00000075437	22.5027	13.4725	22.7229	23.0132	57.7734	18.2372	22.4639	21.1721	25.9389	25.5321	9.46732	10.4817	26.4285	30.2902	4.04777	4.49221	3.68904	2.10585	12.2244	7.03917	11	112792730	112799008	-	lncRNA	Gm11681
ENSMUSG00000088752	3.40293	-0.743031	0.228342	-3.25402	0.00113785	0.0067791	11	69663042	69663125	+	miRNA	Mir1934	ENSMUSG00000088752	0	2.44954	5.4102	9.8628	7.35298	4.14482	6.41826	13.2326	2.59389	3.19151	0	0.551668	1.95766	1.37683	0.809555	5.13395	0.922261	1.05293	0.81496	0.78213	11	69663042	69663125	+	miRNA	Mir1934
ENSMUSG00000022215	16.6896	-0.742948	0.224033	-3.31624	0.00091236	0.00564757	14	55575616	55576954	+	protein_coding	Fitm1	ENSMUSG00000022215	16.252	12.2477	14.0665	24.1091	39.9162	23.211	27.8124	23.8186	18.1572	29.7875	1.18341	13.24	16.6401	20.6524	3.23822	5.77569	11.9894	22.1114	4.88976	4.69278	14	55575616	55576954	+	protein_coding	Fitm1
ENSMUSG00000106644	13.6876	-0.742429	0.231209	-3.21107	0.0013224	0.00763377	5	126852756	126885316	+	lncRNA	Gm40331	ENSMUSG00000106644	17.5021	1.22477	18.3947	17.5339	16.8068	17.4082	28.8822	18.5256	25.9389	32.979	3.55024	8.27502	7.83065	5.5073	0.809555	1.28349	11.9894	10.5293	15.4842	13.2962	5	126852756	126885316	+	lncRNA	Gm40331
ENSMUSG00000044786	408.114	-0.742426	0.12121	-6.12513	9.06e-10	7.91e-08	7	28376783	28380253	-	protein_coding	Zfp36	ENSMUSG00000044786	378.796	442.142	397.109	574.234	593.49	455.101	408.629	484.312	888.407	562.77	257.984	255.974	398.384	327.685	307.631	304.828	300.657	275.866	272.197	276.092	7	28376783	28380253	-	protein_coding	Zfp36
ENSMUSG00000065315	5.30977	-0.742354	0.231839	-3.20202	0.00136469	0.00782631	13	43425741	43425850	-	snRNA	Gm26064	ENSMUSG00000065315	2.5003	2.44954	12.9845	8.76693	9.45383	7.46068	11.7668	5.29303	9.07861	6.38303	0	3.31001	1.95766	5.5073	1.61911	2.56697	1.84452	2.10585	4.88976	6.25704	13	43425741	43425850	-	snRNA	Gm26064
ENSMUSG00000058046	23.3954	-0.74135	0.200449	-3.69846	0.000216914	0.00176099	4	62525368	62547993	+	protein_coding	4933430I17Rik	ENSMUSG00000058046	15.0018	13.4725	23.8049	33.9719	55.6725	26.5269	48.1369	25.1419	40.2053	27.6598	11.8341	15.4467	30.3438	19.2756	8.9051	14.7601	11.9894	16.8468	18.7441	10.1677	4	62525368	62547993	+	protein_coding	4933430I17Rik
ENSMUSG00000088519	5.75982	-0.74098	0.233512	-3.1732	0.0015077	0.00847051	11	3474284	3474401	-	snoRNA	Gm24439	ENSMUSG00000088519	2.5003	7.34862	4.32816	12.0545	17.8572	10.7765	4.27884	9.2628	7.78167	8.5107	3.55024	1.10334	7.83065	0	2.42866	2.56697	7.37809	0	4.0748	1.56426	11	3474284	3474401	-	snoRNA	Gm24439
ENSMUSG00000074388	8.17946	-0.740933	0.233262	-3.17639	0.00149119	0.00838541	3	97930172	97967018	+	lncRNA	Gm5544	ENSMUSG00000074388	3.75045	6.12385	4.32816	10.9587	9.45383	14.9214	22.4639	15.8791	14.2664	17.0214	7.10049	6.62001	3.91533	5.5073	1.61911	0	3.68904	0	8.1496	7.8213	3	97930172	97967018	+	lncRNA	Gm5544
ENSMUSG00000104347	8.04017	-0.740592	0.225897	-3.27844	0.00104381	0.00631209	4	6378017	6378292	+	TEC	Gm37689	ENSMUSG00000104347	11.2514	3.67431	6.49224	8.76693	14.706	18.2372	17.1153	13.2326	10.3756	8.5107	1.18341	11.0334	6.85182	5.5073	1.61911	4.49221	3.68904	5.26463	4.88976	3.91065	4	6378017	6378292	+	TEC	Gm37689
ENSMUSG00000035394	23.9621	-0.740554	0.20955	-3.53403	0.00040928	0.00293958	18	74283089	74359986	+	protein_coding	Cfap53	ENSMUSG00000035394	25.003	19.5963	36.7894	26.3008	64.076	27.3558	45.9975	15.8791	38.9083	22.3406	15.3844	28.6867	12.7248	17.8987	8.9051	13.4766	23.0565	3.15878	21.189	12.5141	18	74283089	74359986	+	protein_coding	Cfap53
ENSMUSG00000078957	12.1345	-0.740523	0.232952	-3.17886	0.00147855	0.00832502	2	158192007	158195749	+	lncRNA	1700060C20Rik	ENSMUSG00000078957	13.7517	11.0229	6.49224	23.0132	35.7145	25.6979	4.27884	27.7884	18.1572	17.0214	4.73366	7.72335	17.619	6.88413	2.42866	0.641744	15.6784	0	3.25984	0.78213	2	158192007	158195749	+	lncRNA	1700060C20Rik
ENSMUSG00000097592	32.2203	-0.739501	0.208807	-3.54156	0.00039777	0.00287672	9	106247959	106249413	+	lncRNA	4930500F10Rik	ENSMUSG00000097592	31.2538	15.922	22.7229	49.314	58.8238	66.3171	52.4158	27.7884	27.2358	78.724	21.3015	24.2734	11.746	39.928	26.7153	24.3863	23.0565	8.4234	10.5945	23.4639	9	106247959	106249413	+	lncRNA	4930500F10Rik
ENSMUSG00000104918	203.287	-0.739404	0.155397	-4.75818	1.95e-06	3.83e-05	3	18622161	18626141	+	TEC	Gm42944	ENSMUSG00000104918	193.773	182.491	181.783	241.091	321.43	277.703	334.819	185.256	363.145	328.726	120.708	157.225	164.444	210.654	88.2415	71.2335	154.018	145.304	163.807	179.89	3	18622161	18626141	+	TEC	Gm42944
ENSMUSG00000000791	353.782	-0.739198	0.148047	-4.99298	5.95e-07	1.47e-05	8	70808448	70821424	+	protein_coding	Il12rb1	ENSMUSG00000000791	302.537	331.913	459.867	517.249	609.247	340.704	599.037	314.935	440.961	612.771	192.897	233.356	371.956	370.366	182.959	179.046	283.134	211.638	217.594	303.467	8	70808448	70821424	+	protein_coding	Il12rb1
ENSMUSG00000108563	51.597	-0.738959	0.136723	-5.40478	6.49e-08	2.44e-06	7	73538012	73554801	+	lncRNA	Gm44686	ENSMUSG00000108563	56.2568	51.4403	57.3481	60.2727	69.3281	58.0275	78.0888	54.2535	114.131	58.5111	47.3366	42.4784	41.1109	41.3048	32.3822	36.5794	33.2014	36.8524	30.9685	32.0673	7	73538012	73554801	+	lncRNA	Gm44686
ENSMUSG00000041237	8.50134	-0.738723	0.229557	-3.21804	0.00129069	0.00748739	3	89136141	89146784	+	protein_coding	Pklr	ENSMUSG00000041237	15.0018	4.89908	6.49224	15.3421	9.45383	11.6055	16.0456	19.8489	9.07861	13.8299	4.73366	14.895	3.91533	1.37683	6.47644	1.92523	3.68904	1.05293	4.88976	5.47491	3	89136141	89146784	+	protein_coding	Pklr
ENSMUSG00000110052	42.6004	-0.738123	0.193254	-3.81944	0.000133754	0.00118473	8	70488180	70489069	+	TEC	1700020G03Rik	ENSMUSG00000110052	23.7529	56.3394	44.3637	71.2313	65.1264	77.0937	75.9494	70.1326	18.1572	58.5111	11.8341	26.4801	30.3438	27.5365	17.0006	23.7445	42.424	30.5348	41.5629	39.8886	8	70488180	70489069	+	TEC	1700020G03Rik
ENSMUSG00000106099	247.354	-0.737827	0.148693	-4.96209	6.97e-07	1.67e-05	3	119743207	119746446	-	lncRNA	Gm42664	ENSMUSG00000106099	188.773	227.807	285.659	219.173	465.338	545.458	410.768	254.065	295.703	273.406	149.11	194.739	151.719	227.176	182.959	163.003	140.184	192.685	155.657	223.689	3	119743207	119746446	-	lncRNA	Gm42664
ENSMUSG00000038522	128.729	-0.737346	0.136462	-5.4033	6.54e-08	2.45e-06	10	40001574	40025268	-	protein_coding	Mfsd4b1	ENSMUSG00000038522	171.271	142.073	101.712	185.201	184.875	165.793	229.988	153.498	120.616	182.98	125.442	93.2319	85.1583	104.639	66.3835	54.5482	94.0706	86.3399	114.909	111.845	10	40001574	40025268	-	protein_coding	Mfsd4b1
ENSMUSG00000081834	7.37483	-0.737311	0.229371	-3.21449	0.00130677	0.00756492	2	91523579	91523884	-	processed_pseudogene	Gm13770	ENSMUSG00000081834	8.75106	2.44954	14.0665	14.2463	14.706	16.5793	12.8365	3.96977	6.48472	8.5107	3.55024	3.86168	8.80948	8.26096	4.85733	1.92523	1.84452	2.10585	7.33464	2.34639	2	91523579	91523884	-	processed_pseudogene	Gm13770
ENSMUSG00000100867	15.4628	-0.737227	0.190139	-3.87731	0.000105616	0.000977301	6	118617625	118619224	-	processed_pseudogene	Gm18981	ENSMUSG00000100867	16.252	14.6972	9.73836	23.0132	31.5128	23.211	21.3942	17.2023	20.7511	23.4044	21.3015	7.72335	9.78832	8.26096	9.71466	10.2679	9.22261	12.6351	9.77952	9.38556	6	118617625	118619224	-	processed_pseudogene	Gm18981
ENSMUSG00000106959	31.2789	-0.736993	0.189457	-3.89002	0.000100236	0.00093541	6	28233080	28237013	-	TEC	Gm42548	ENSMUSG00000106959	23.7529	24.4954	20.5588	43.8347	66.1768	48.9089	52.4158	38.3745	44.0961	48.9366	8.2839	20.4117	14.6825	17.8987	18.6198	32.7289	35.0459	16.8468	25.2638	24.246	6	28233080	28237013	-	TEC	Gm42548
ENSMUSG00000065513	22.7225	-0.736869	0.1974	-3.73287	0.000189312	0.00157959	9	119031795	119031885	+	miRNA	Mir26a-1	ENSMUSG00000065513	22.5027	8.57339	25.969	26.3008	33.6136	29.8427	34.2307	50.2838	37.6114	30.8513	9.46732	19.3084	13.7036	30.2902	14.572	12.1931	12.9117	8.4234	23.6338	10.1677	9	119031795	119031885	+	miRNA	Mir26a-1
ENSMUSG00000066755	6.02931	-0.736623	0.220667	-3.33816	0.000843354	0.00530219	1	161494654	161505290	+	protein_coding	Tnfsf18	ENSMUSG00000066755	7.50091	4.89908	0	13.1504	4.2017	6.63171	4.27884	7.93954	50.5809	2.12768	0	1.10334	1.95766	0	0	1.28349	2.76678	4.2117	3.25984	4.69278	1	161494654	161505290	+	protein_coding	Tnfsf18
ENSMUSG00000097574	73.0218	-0.736595	0.233255	-3.1579	0.00158911	0.00883063	9	78175913	78178879	+	transcribed_unprocessed_pseudogene	C920006O11Rik	ENSMUSG00000097574	41.255	15.922	160.142	81.0941	224.791	65.4882	78.0888	289.793	88.1923	47.8727	10.6507	28.6867	28.3861	101.885	27.5249	19.2523	7.37809	28.429	35.0433	80.5594	9	78175913	78178879	+	transcribed_unprocessed_pseudogene	C920006O11Rik
ENSMUSG00000117239	4.20044	-0.736555	0.22863	-3.22161	0.00127473	0.00741304	17	13341240	13345880	-	transcribed_processed_pseudogene	Gpr31c	ENSMUSG00000117239	0	4.89908	8.65632	4.38347	4.2017	11.6055	12.8365	5.29303	5.18778	9.57454	2.36683	1.10334	3.91533	0	0	1.28349	0	0	2.44488	6.25704	17	13341240	13345880	-	transcribed_processed_pseudogene	Gpr31c
ENSMUSG00000084477	13.3858	-0.736507	0.213123	-3.45578	0.000548699	0.00373108	6	140530962	140531215	+	misc_RNA	Gm25780	ENSMUSG00000084477	12.5015	4.89908	11.9024	14.2463	26.2606	24.8689	12.8365	18.5256	22.0481	30.8513	13.0176	6.62001	6.85182	8.26096	7.28599	5.77569	10.1449	15.7939	4.0748	10.9498	6	140530962	140531215	+	misc_RNA	Gm25780
ENSMUSG00000031384	9.18183	-0.736354	0.2287	-3.21974	0.00128306	0.00745579	X	164506326	164539752	+	protein_coding	Asb9	ENSMUSG00000031384	7.50091	7.34862	12.9845	17.5339	10.5043	14.9214	10.6971	15.8791	10.3756	20.2129	2.36683	7.72335	6.85182	13.7683	0	1.28349	6.45583	2.10585	6.51968	8.60343	X	164506326	164539752	+	protein_coding	Asb9
ENSMUSG00000055403	35.2544	-0.736156	0.216881	-3.39428	0.000688089	0.00449251	6	88950682	89110031	+	lncRNA	4933427D06Rik	ENSMUSG00000055403	15.0018	25.7202	24.8869	65.752	55.6725	73.7778	89.8556	37.0512	36.3145	53.1919	26.0351	33.1001	30.3438	30.2902	8.09555	31.4454	11.0671	33.6936	8.1496	15.6426	6	88950682	89110031	+	lncRNA	4933427D06Rik
ENSMUSG00000112047	6.83771	-0.735988	0.233538	-3.15147	0.00162453	0.00898683	12	80629293	80629558	-	processed_pseudogene	Gm47852	ENSMUSG00000112047	5.0006	2.44954	5.4102	7.67107	23.1094	9.11861	11.7668	21.1721	12.9694	2.12768	1.18341	2.20667	2.93649	5.5073	4.04777	0	5.53356	4.2117	4.0748	6.25704	12	80629293	80629558	-	processed_pseudogene	Gm47852
ENSMUSG00000047730	51.5118	-0.735972	0.180179	-4.08466	4.41e-05	0.000476339	7	28071235	28120862	+	protein_coding	Fcgbp	ENSMUSG00000047730	21.2526	55.1146	45.4457	73.4231	80.8828	81.2385	52.4158	72.7791	92.0831	95.7454	27.2185	39.1684	45.0263	31.667	24.2866	23.1028	61.7915	34.7465	41.5629	31.2852	7	28071235	28120862	+	protein_coding	Fcgbp
ENSMUSG00000103520	142.437	-0.735307	0.133533	-5.50657	3.66e-08	1.57e-06	15	81584173	81585028	-	TEC	1110025M09Rik	ENSMUSG00000103520	111.263	102.881	160.142	230.132	204.833	224.649	220.36	179.963	213.996	161.703	94.6732	92.6802	124.312	130.798	98.7657	78.2927	110.671	82.1282	127.949	98.5484	15	81584173	81585028	-	TEC	1110025M09Rik
ENSMUSG00000097848	40.5966	-0.735272	0.162472	-4.52552	6.02e-06	9.57e-05	13	99100705	99107580	+	lncRNA	Gm807	ENSMUSG00000097848	40.0048	58.7889	59.5122	64.6561	46.2187	56.3696	44.9278	37.0512	35.0175	77.6602	29.5854	27.0317	46.0051	42.6816	24.2866	29.5202	29.5123	21.0585	14.6693	27.3746	13	99100705	99107580	+	lncRNA	Gm807
ENSMUSG00000082404	7.53136	-0.735258	0.227135	-3.23709	0.00120754	0.00709637	X	8042464	8042893	-	processed_pseudogene	Gm14799	ENSMUSG00000082404	8.75106	8.57339	16.2306	17.5339	15.7564	9.94757	7.48797	6.61629	9.07861	4.25535	7.10049	5.51668	2.93649	6.88413	0.809555	6.41744	3.68904	7.37048	4.88976	0.78213	X	8042464	8042893	-	processed_pseudogene	Gm14799
ENSMUSG00000044702	151.305	-0.735194	0.145782	-5.04312	4.58e-07	1.19e-05	7	122107261	122132985	-	protein_coding	Palb2	ENSMUSG00000044702	136.266	124.926	143.911	183.01	236.346	323.296	236.406	177.316	137.476	232.981	132.542	101.507	101.798	117.03	115.766	95.6198	82.0812	81.0752	117.354	149.387	7	122107261	122132985	-	protein_coding	Palb2
ENSMUSG00000110345	14.4105	-0.734761	0.230643	-3.18571	0.00144398	0.00817544	8	26966433	26967474	+	lncRNA	Gm45572	ENSMUSG00000110345	0	7.34862	24.8869	20.8215	31.5128	35.6455	24.6033	19.8489	10.3756	27.6598	4.73366	7.72335	12.7248	13.7683	5.66688	3.85046	14.7562	12.6351	6.51968	3.12852	8	26966433	26967474	+	lncRNA	Gm45572
ENSMUSG00000045322	137.565	-0.734699	0.144041	-5.10064	3.39e-07	9.26e-06	9	106222597	106226883	+	protein_coding	Tlr9	ENSMUSG00000045322	207.525	178.816	149.322	162.188	196.43	217.189	158.317	142.912	219.184	125.533	147.927	61.7868	79.2854	66.0876	97.9561	118.723	73.7809	98.975	93.7204	155.644	9	106222597	106226883	+	protein_coding	Tlr9
ENSMUSG00000079436	21.8325	-0.73457	0.210409	-3.49115	0.000480938	0.00334984	1	87386362	87394729	-	protein_coding	Kcnj13	ENSMUSG00000079436	25.003	26.9449	37.8714	28.4925	68.2777	23.211	19.2548	21.1721	33.7206	8.5107	10.6507	14.895	11.746	20.6524	8.09555	16.6853	9.22261	20.0056	23.6338	8.60343	1	87386362	87394729	-	protein_coding	Kcnj13
ENSMUSG00000025491	130.314	-0.734483	0.221531	-3.31548	0.000914853	0.00566185	7	140967220	140969825	+	protein_coding	Ifitm1	ENSMUSG00000025491	83.7601	308.642	106.04	98.628	151.261	163.306	101.622	86.0117	573.25	112.767	80.4722	57.3735	55.7934	61.9572	106.052	114.23	59.947	87.3928	114.094	83.6879	7	140967220	140969825	+	protein_coding	Ifitm1
ENSMUSG00000083518	7.71838	-0.734277	0.22966	-3.19723	0.00138753	0.00793499	X	8034211	8035079	+	processed_pseudogene	Gm9429	ENSMUSG00000083518	13.7517	6.12385	9.73836	18.6297	4.2017	13.2634	10.6971	10.5861	9.07861	13.8299	2.36683	9.93002	3.91533	2.75365	6.47644	6.41744	0	6.31755	0.81496	5.47491	X	8034211	8035079	+	processed_pseudogene	Gm9429
ENSMUSG00000102372	6.43287	-0.733406	0.231824	-3.16363	0.00155812	0.00869163	1	156290101	156290747	-	TEC	A430050A11Rik	ENSMUSG00000102372	2.5003	2.44954	4.32816	14.2463	12.6051	29.8427	10.6971	2.64651	14.2664	4.25535	4.73366	6.06835	2.93649	6.88413	1.61911	0	2.76678	1.05293	1.62992	3.12852	1	156290101	156290747	-	TEC	A430050A11Rik
ENSMUSG00000074805	16.8194	-0.73336	0.195986	-3.74189	0.000182641	0.00153479	2	129369896	129375748	+	lncRNA	Il1bos	ENSMUSG00000074805	15.0018	17.1468	10.8204	28.4925	17.8572	26.5269	31.0216	19.8489	29.8297	25.5321	7.10049	10.4817	6.85182	11.0146	6.47644	10.2679	14.7562	10.5293	21.189	15.6426	2	129369896	129375748	+	lncRNA	Il1bos
ENSMUSG00000020712	32.2558	-0.733085	0.175265	-4.18272	2.88e-05	0.000340445	11	106276671	106288745	+	protein_coding	Tcam1	ENSMUSG00000020712	20.0024	28.1697	37.8714	42.7388	45.1683	59.6854	62.0431	30.4349	41.5022	47.8727	35.5024	27.0317	21.5343	27.5365	20.2389	14.1184	27.6678	21.0585	13.0394	21.8996	11	106276671	106288745	+	protein_coding	Tcam1
ENSMUSG00000114959	7.51036	-0.732994	0.228751	-3.20433	0.00135377	0.00777673	13	47910434	47934301	+	lncRNA	G630093K05Rik	ENSMUSG00000114959	11.2514	12.2477	12.9845	4.38347	6.30255	18.2372	10.6971	9.2628	10.3756	10.6384	4.73366	10.4817	0.978832	2.75365	3.23822	2.56697	1.84452	2.10585	6.51968	8.60343	13	47910434	47934301	+	lncRNA	G630093K05Rik
ENSMUSG00000074580	142.279	-0.732431	0.151699	-4.82819	1.38e-06	2.89e-05	3	65507256	65529379	-	transcribed_processed_pseudogene	4931440P22Rik	ENSMUSG00000074580	107.513	101.656	150.404	211.502	245.8	222.991	224.639	186.579	154.336	215.959	66.2712	140.124	136.058	136.306	102.813	89.8441	99.6042	68.4401	101.055	83.6879	3	65507256	65529379	-	transcribed_processed_pseudogene	4931440P22Rik
ENSMUSG00000032807	518.476	-0.732424	0.207588	-3.52826	0.000418302	0.00298897	11	69156988	69169792	+	protein_coding	Alox12b	ENSMUSG00000032807	388.797	467.862	275.92	733.135	1117.65	712.08	474.951	719.852	1370.87	659.58	267.452	417.061	520.738	647.108	246.914	225.252	360.604	155.833	275.456	332.405	11	69156988	69169792	+	protein_coding	Alox12b
ENSMUSG00000110221	47.3504	-0.732414	0.177308	-4.13075	3.62e-05	0.000406354	7	4898449	4906516	-	protein_coding	Gm36210	ENSMUSG00000110221	43.7553	55.1146	49.7739	55.8892	58.8238	98.6467	83.4373	39.6977	32.4236	94.6816	49.7034	36.4101	23.492	48.1889	35.6204	32.0872	28.5901	17.8997	24.4488	38.3244	7	4898449	4906516	-	protein_coding	Gm36210
ENSMUSG00000072969	2932.42	-0.732134	0.114633	-6.38678	1.69e-10	2.07e-08	X	135742732	135747322	+	protein_coding	Armcx5	ENSMUSG00000072969	2701.58	2101.7	2961.54	3914.44	5003.18	4810.48	3919.41	3792.46	3562.71	4317.05	1952.63	2486.37	2419.67	2380.53	1795.59	1800.73	2163.62	2291.16	2152.31	2121.14	X	135742732	135747322	+	protein_coding	Armcx5
ENSMUSG00000097155	25.5251	-0.731927	0.210892	-3.47062	0.000519252	0.00356966	9	21717615	21723450	-	lncRNA	Gm26511	ENSMUSG00000097155	23.7529	9.79816	20.5588	26.3008	26.2606	55.5406	29.9519	70.1326	49.2839	31.9151	7.10049	30.8934	24.4708	13.7683	11.3338	12.1931	14.7562	18.9527	17.1142	16.4247	9	21717615	21723450	-	lncRNA	Gm26511
ENSMUSG00000041673	19.8757	-0.731116	0.223532	-3.27074	0.00107265	0.00646073	14	32991381	33015291	+	protein_coding	Lrrc18	ENSMUSG00000041673	12.5015	22.0458	33.5433	16.438	48.3196	29.0137	37.4398	13.2326	41.5022	20.2129	11.8341	17.1017	5.87299	2.75365	4.04777	7.70092	11.0671	11.5822	30.9685	20.3354	14	32991381	33015291	+	protein_coding	Lrrc18
ENSMUSG00000092286	128.663	-0.730719	0.150451	-4.85686	1.19e-06	2.58e-05	12	3752542	3762146	-	lncRNA	Dtnbos	ENSMUSG00000092286	97.5118	84.5091	97.3836	219.173	213.236	199.78	208.593	170.7	160.821	193.619	67.4546	102.61	109.629	103.262	86.6224	80.8597	107.905	75.8106	111.649	82.1237	12	3752542	3762146	-	lncRNA	Dtnbos
ENSMUSG00000026774	30.9504	-0.730411	0.210996	-3.46173	0.000536721	0.00366508	2	23207475	23267129	+	protein_coding	Potegl	ENSMUSG00000026774	25.003	15.922	30.2971	83.2859	59.8743	57.1985	50.2763	17.2023	33.7206	41.4897	10.6507	33.1001	30.3438	23.406	8.09555	14.1184	23.0565	28.429	17.1142	16.4247	2	23207475	23267129	+	protein_coding	Potegl
ENSMUSG00000054191	23.5293	-0.730246	0.207549	-3.51842	0.00043412	0.0030826	8	84901927	84905291	+	protein_coding	Klf1	ENSMUSG00000054191	15.0018	12.2477	11.9024	28.4925	55.6725	31.5006	43.8581	23.8186	45.3931	45.745	10.6507	13.7917	21.5343	15.1451	24.2866	8.34267	13.8339	12.6351	18.7441	17.989	8	84901927	84905291	+	protein_coding	Klf1
ENSMUSG00000043429	5.91178	-0.730204	0.230846	-3.16317	0.00156061	0.00869914	1	182747125	182749180	-	protein_coding	Ccdc185	ENSMUSG00000043429	5.0006	2.44954	6.49224	15.3421	16.8068	13.2634	6.41826	5.29303	12.9694	6.38303	4.73366	1.10334	0	8.26096	1.61911	0	1.84452	2.10585	8.1496	0	1	182747125	182749180	-	protein_coding	Ccdc185
ENSMUSG00000116241	5.90571	-0.729886	0.231427	-3.15385	0.00161133	0.00893315	15	99254524	99254835	-	processed_pseudogene	Gm49458	ENSMUSG00000116241	11.2514	2.44954	8.65632	14.2463	5.25213	15.7503	11.7668	3.96977	5.18778	5.31919	1.18341	3.31001	1.95766	4.13048	2.42866	3.20872	6.45583	2.10585	2.44488	7.03917	15	99254524	99254835	-	processed_pseudogene	Gm49458
ENSMUSG00000052180	11.5461	-0.729764	0.221974	-3.28761	0.00101042	0.00614046	13	33879815	33905708	-	protein_coding	Serpinb6c	ENSMUSG00000052180	10.0012	11.0229	7.57428	8.76693	16.8068	25.6979	16.0456	15.8791	24.642	20.2129	7.10049	7.72335	12.7248	17.8987	3.23822	8.34267	2.76678	4.2117	2.44488	7.8213	13	33879815	33905708	-	protein_coding	Serpinb6c
ENSMUSG00000085204	25.6325	-0.729627	0.213253	-3.42142	0.000622959	0.00414321	13	111809140	111811039	+	lncRNA	Gm15327	ENSMUSG00000085204	16.252	22.0458	30.2971	20.8215	73.5298	43.1061	45.9975	25.1419	36.3145	31.9151	11.8341	26.4801	22.5131	8.26096	31.5726	8.34267	22.1343	11.5822	6.51968	17.989	13	111809140	111811039	+	lncRNA	Gm15327
ENSMUSG00000011486	53.8205	-0.72936	0.205678	-3.54612	0.000390941	0.00283578	17	57032772	57041654	-	protein_coding	Slc25a41	ENSMUSG00000011486	17.5021	35.5183	38.9535	44.9305	134.454	108.594	118.738	87.335	47.987	81.9155	18.9346	53.5118	31.3226	44.0584	41.2873	34.6542	35.9682	37.9053	26.0787	36.7601	17	57032772	57041654	-	protein_coding	Slc25a41
ENSMUSG00000112375	29.5795	-0.729226	0.187674	-3.8856	0.000102077	0.000949134	10	82845732	82859008	-	lncRNA	Gm38560	ENSMUSG00000112375	45.0054	36.7431	34.6253	40.5471	38.8657	25.6979	63.1129	37.0512	29.8297	35.1067	27.2185	18.205	18.5978	6.88413	14.572	7.70092	34.1236	24.2173	26.8937	26.5924	10	82845732	82859008	-	lncRNA	Gm38560
ENSMUSG00000048583	129.814	-0.728695	0.216603	-3.3642	0.000767664	0.00491263	7	142650765	142666816	-	protein_coding	Igf2	ENSMUSG00000048583	172.521	171.468	213.162	104.107	172.27	192.32	173.293	182.609	198.433	176.597	98.2234	46.8918	31.3226	15.1451	142.482	172.629	45.1908	140.039	71.7165	75.8666	7	142650765	142666816	-	protein_coding	Igf2
ENSMUSG00000073018	18.6231	-0.7283	0.231077	-3.15176	0.0016229	0.00898427	6	71293764	71302880	+	transcribed_unprocessed_pseudogene	Gm1070	ENSMUSG00000073018	22.5027	4.89908	28.1331	48.2181	26.2606	36.4744	38.5095	18.5256	2.59389	38.2982	2.36683	23.1701	4.89416	11.0146	10.5242	6.41744	16.6007	4.2117	17.1142	11.732	6	71293764	71302880	+	transcribed_unprocessed_pseudogene	Gm1070
ENSMUSG00000087371	8.78156	-0.728147	0.228638	-3.18471	0.00144898	0.00819636	7	27502717	27508122	-	lncRNA	Gm15541	ENSMUSG00000087371	10.0012	13.4725	5.4102	24.1091	6.30255	16.5793	16.0456	13.2326	5.18778	11.7022	11.8341	7.72335	5.87299	6.88413	0.809555	1.92523	3.68904	2.10585	5.70472	7.03917	7	27502717	27508122	-	lncRNA	Gm15541
ENSMUSG00000109930	31.9267	-0.727726	0.165281	-4.40296	1.07e-05	0.000151653	8	60616415	60632731	-	lncRNA	Gm34730	ENSMUSG00000109930	32.5039	36.7431	54.102	33.9719	50.4204	24.8689	47.0672	31.7582	47.987	50.0004	30.7688	23.7217	29.3649	30.2902	13.7624	17.3271	23.9788	12.6351	27.7086	19.5533	8	60616415	60632731	-	lncRNA	Gm34730
ENSMUSG00000112311	3.25398	-0.727685	0.227636	-3.19671	0.00139007	0.00793777	10	81887012	81887964	+	processed_pseudogene	Gm8153	ENSMUSG00000112311	3.75045	1.22477	5.4102	7.67107	2.10085	5.80275	9.62738	7.93954	3.89083	5.31919	0	5.51668	0	0	0.809555	0.641744	0.922261	2.10585	0	2.34639	10	81887012	81887964	+	processed_pseudogene	Gm8153
ENSMUSG00000097141	382.335	-0.727212	0.22472	-3.23608	0.00121184	0.00711207	18	82692283	82694176	+	TEC	Gm10524	ENSMUSG00000097141	461.306	562.169	384.124	442.73	1288.87	118.542	483.509	189.226	470.791	865.964	297.037	262.594	307.353	245.075	107.671	346.542	192.753	68.4401	267.307	284.695	18	82692283	82694176	+	TEC	Gm10524
ENSMUSG00000035373	7.57878	-0.727162	0.233539	-3.11367	0.00184775	0.00996447	11	82045711	82047525	+	protein_coding	Ccl7	ENSMUSG00000035373	15.0018	14.6972	6.49224	8.76693	1.05043	3.31586	4.27884	7.93954	38.9083	11.7022	4.73366	3.86168	3.91533	1.37683	1.61911	3.85046	3.68904	8.4234	3.25984	4.69278	11	82045711	82047525	+	protein_coding	Ccl7
ENSMUSG00000006611	306.095	-0.727079	0.105669	-6.88072	5.96e-12	1.32e-09	13	23702033	23710854	-	protein_coding	Hfe	ENSMUSG00000006611	326.289	493.582	330.022	379.17	410.716	296.769	418.256	328.168	521.372	354.258	282.836	249.354	226.11	235.437	228.294	202.791	182.608	169.521	268.122	218.214	13	23702033	23710854	-	protein_coding	Hfe
ENSMUSG00000022945	72.2382	-0.726724	0.166139	-4.37419	1.22e-05	0.000168413	16	93883900	93906115	+	protein_coding	Chaf1b	ENSMUSG00000022945	40.0048	55.1146	91.9734	84.3817	152.312	94.5019	130.505	84.6885	83.0045	111.703	53.2537	45.7884	80.2642	57.8267	51.0019	46.8473	39.6572	40.0112	64.3818	37.5423	16	93883900	93906115	+	protein_coding	Chaf1b
ENSMUSG00000020473	974.217	-0.726721	0.131907	-5.50935	3.6e-08	1.55e-06	11	5861946	5872088	+	protein_coding	Aebp1	ENSMUSG00000020473	1283.9	1066.77	1482.4	1090.39	1501.06	1143.14	1179.89	1507.19	992.163	1119.16	631.943	559.943	782.086	682.906	851.652	1101.87	325.558	807.594	750.578	624.14	11	5861946	5872088	+	protein_coding	Aebp1
ENSMUSG00000046650	5.63605	-0.726587	0.233253	-3.11502	0.00183935	0.0099244	19	12387278	12401584	+	protein_coding	Olfr1440	ENSMUSG00000046650	10.0012	7.34862	4.32816	8.76693	2.10085	11.6055	8.55767	10.5861	12.9694	6.38303	0	3.86168	3.91533	2.75365	0	3.85046	4.6113	0	3.25984	7.8213	19	12387278	12401584	+	protein_coding	Olfr1440
ENSMUSG00000092124	20.1336	-0.726576	0.205382	-3.53767	0.000403668	0.0029081	18	31609511	31610751	+	protein_coding	B930094E09Rik	ENSMUSG00000092124	16.252	25.7202	25.969	26.3008	48.3196	33.9875	31.0216	7.93954	16.8603	34.0428	13.0176	8.27502	15.6613	11.0146	11.3338	14.7601	5.53356	22.1114	22.8189	11.732	18	31609511	31610751	+	protein_coding	B930094E09Rik
ENSMUSG00000064310	17.6579	-0.726574	0.226317	-3.21043	0.00132539	0.0076481	16	55225174	55297986	-	protein_coding	Zpld1	ENSMUSG00000064310	13.7517	15.922	17.3126	15.3421	34.664	39.7903	29.9519	21.1721	31.1267	24.4683	7.10049	9.93002	26.4285	13.7683	1.61911	5.77569	1.84452	17.8997	6.51968	18.7711	16	55225174	55297986	-	protein_coding	Zpld1
ENSMUSG00000107430	30.146	-0.726478	0.195322	-3.71938	0.000199714	0.00164356	17	53699705	53700472	+	processed_pseudogene	Gm31532	ENSMUSG00000107430	28.7535	9.79816	35.7073	56.9851	34.664	56.3696	49.2066	38.3745	41.5022	44.6812	11.8341	23.7217	35.2379	15.1451	25.9058	8.98441	16.6007	23.1644	22.8189	23.4639	17	53699705	53700472	+	processed_pseudogene	Gm31532
ENSMUSG00000091680	21.0341	-0.726421	0.187351	-3.87732	0.000105613	0.000977301	15	89384916	89388867	+	protein_coding	Klhdc7b	ENSMUSG00000091680	20.0024	22.0458	15.1486	36.1636	31.5128	35.6455	23.5336	26.4651	31.1267	29.7875	15.3844	11.585	19.5766	30.2902	11.3338	8.34267	8.30035	11.5822	19.559	13.2962	15	89384916	89388867	+	protein_coding	Klhdc7b
ENSMUSG00000046408	179.088	-0.725221	0.172972	-4.19271	2.76e-05	0.000327304	8	84001501	84004770	+	protein_coding	1700067K01Rik	ENSMUSG00000046408	182.522	90.6329	176.373	236.707	294.119	329.928	377.607	129.679	197.136	297.875	78.1054	159.432	124.312	163.842	106.052	85.3519	139.261	103.187	153.212	156.426	8	84001501	84004770	+	protein_coding	1700067K01Rik
ENSMUSG00000069439	7.46142	-0.724814	0.233233	-3.10768	0.00188565	0.0101261	15	81843345	81843713	-	processed_pseudogene	Gm8444	ENSMUSG00000069439	2.5003	8.57339	11.9024	8.76693	17.8572	18.2372	4.27884	25.1419	2.59389	8.5107	3.55024	6.62001	8.80948	2.75365	1.61911	4.49221	0.922261	4.2117	1.62992	6.25704	15	81843345	81843713	-	processed_pseudogene	Gm8444
ENSMUSG00000046846	2.95107	-0.724731	0.224655	-3.22598	0.00125543	0.007319	9	62270728	62282208	-	protein_coding	Spesp1	ENSMUSG00000046846	2.5003	2.44954	6.49224	4.38347	7.35298	1.65793	4.27884	2.64651	10.3756	6.38303	2.36683	3.31001	0	0	0	0	0	0	3.25984	1.56426	9	62270728	62282208	-	protein_coding	Spesp1
ENSMUSG00000004552	75.185	-0.724395	0.227109	-3.18964	0.0014245	0.00808459	1	131638305	131675505	+	protein_coding	Ctse	ENSMUSG00000004552	62.5075	26.9449	164.47	73.4231	23.1094	298.427	299.519	10.5861	77.8167	159.576	16.5678	40.8234	22.5131	11.0146	4.85733	10.2679	25.8233	29.4819	128.764	17.2069	1	131638305	131675505	+	protein_coding	Ctse
ENSMUSG00000038591	5.32976	-0.724387	0.232831	-3.11121	0.00186321	0.0100319	15	54410773	54466358	+	protein_coding	Colec10	ENSMUSG00000038591	12.5015	1.22477	6.49224	8.76693	6.30255	6.63171	11.7668	13.2326	3.89083	6.38303	2.36683	4.41334	0	2.75365	4.85733	3.85046	3.68904	4.2117	3.25984	0	15	54410773	54466358	+	protein_coding	Colec10
ENSMUSG00000075002	6.24121	-0.724279	0.232594	-3.11391	0.00184623	0.00995802	16	58613674	58616978	-	protein_coding	Gm813	ENSMUSG00000075002	8.75106	0	0	13.1504	16.8068	6.63171	13.9062	6.61629	14.2664	13.8299	4.73366	3.31001	1.95766	5.5073	2.42866	3.20872	0	4.2117	0.81496	4.69278	16	58613674	58616978	-	protein_coding	Gm813
ENSMUSG00000051455	61.0232	-0.724185	0.176806	-4.09594	4.2e-05	0.000457593	11	102663715	102682237	+	protein_coding	Meioc	ENSMUSG00000051455	61.2574	58.7889	34.6253	65.752	77.7315	82.8964	60.9734	76.7489	162.118	108.511	60.3541	36.4101	23.492	46.8121	43.716	46.8473	35.0459	57.9109	36.6732	43.7993	11	102663715	102682237	+	protein_coding	Meioc
ENSMUSG00000038276	65.6549	-0.723603	0.192676	-3.75555	0.000172959	0.00146468	5	24413391	24417835	+	protein_coding	Asic3	ENSMUSG00000038276	41.255	41.6422	42.1996	64.6561	165.967	169.109	88.7859	91.3047	79.1136	74.4687	40.2361	56.8218	49.9204	64.7108	46.1446	37.2211	55.3356	31.5878	35.8582	36.7601	5	24413391	24417835	+	protein_coding	Asic3
ENSMUSG00000112721	20.6209	-0.723572	0.232698	-3.10949	0.00187412	0.0100762	10	76684431	76686801	+	lncRNA	Gm35608	ENSMUSG00000112721	10.0012	8.57339	15.1486	33.9719	31.5128	85.3833	28.8822	34.4047	18.1572	29.7875	16.5678	24.8251	21.5343	2.75365	4.04777	4.49221	21.212	4.2117	13.0394	3.91065	10	76684431	76686801	+	lncRNA	Gm35608
ENSMUSG00000051984	26.5087	-0.723313	0.163848	-4.41454	1.01e-05	0.000145166	19	44516956	44545864	-	protein_coding	Sec31b	ENSMUSG00000051984	31.2538	22.0458	29.2151	38.3553	40.9666	26.5269	41.7187	25.1419	44.0961	39.362	16.5678	20.9634	17.619	30.2902	10.5242	16.6853	17.523	25.2702	21.189	14.8605	19	44516956	44545864	-	protein_coding	Sec31b
ENSMUSG00000036185	30.9856	-0.722538	0.167058	-4.32508	1.52e-05	0.000201767	17	35025958	35028016	-	protein_coding	Sapcd1	ENSMUSG00000036185	26.2532	30.6192	36.7894	52.6016	47.2691	44.7641	29.9519	38.3745	47.987	42.5535	16.5678	28.1351	20.5555	41.3048	26.7153	23.7445	16.6007	21.0585	12.2244	15.6426	17	35025958	35028016	-	protein_coding	Sapcd1
ENSMUSG00000064147	30.6659	-0.722518	0.171061	-4.22374	2.4e-05	0.000291645	17	29114144	29148980	+	protein_coding	Rab44	ENSMUSG00000064147	28.7535	23.2706	35.7073	41.6429	48.3196	26.5269	42.7884	56.9001	40.2053	51.0642	11.8341	25.3767	37.1956	30.2902	20.2389	17.3271	20.2897	18.9527	16.2992	20.3354	17	29114144	29148980	+	protein_coding	Rab44
ENSMUSG00000110626	6.61348	-0.722383	0.233183	-3.09792	0.00194883	0.0103955	8	126755570	126758334	-	lncRNA	Gm45805	ENSMUSG00000110626	5.0006	1.22477	8.65632	17.5339	14.706	4.97378	8.55767	22.4954	10.3756	4.25535	2.36683	1.655	7.83065	8.26096	0	1.28349	2.76678	6.31755	2.44488	1.56426	8	126755570	126758334	-	lncRNA	Gm45805
ENSMUSG00000083649	23.6616	-0.721905	0.16244	-4.44414	8.82e-06	0.000130269	7	5124937	5125950	-	protein_coding	Rasl2-9	ENSMUSG00000083649	32.5039	28.1697	29.2151	31.7801	29.4119	38.9613	40.649	21.1721	20.7511	30.8513	11.8341	19.86	19.5766	16.5219	17.8102	13.4766	9.22261	20.0056	19.559	21.8996	7	5124937	5125950	-	protein_coding	Rasl2-9
ENSMUSG00000040705	59.9006	-0.721826	0.128791	-5.60463	2.09e-08	9.95e-07	7	19417465	19421417	-	lncRNA	A930016O22Rik	ENSMUSG00000040705	63.7577	53.8899	71.4147	96.4363	72.4794	93.6729	69.5311	71.4559	89.4892	75.5325	56.8039	33.1001	28.3861	35.7975	52.6211	47.489	45.1908	41.0641	52.9724	46.9278	7	19417465	19421417	-	lncRNA	A930016O22Rik
ENSMUSG00000026177	294.832	-0.721789	0.13017	-5.54497	2.94e-08	1.34e-06	1	74375194	74386062	+	protein_coding	Slc11a1	ENSMUSG00000026177	272.533	254.752	302.971	426.292	482.145	433.548	490.997	248.772	415.022	406.386	276.919	176.534	264.285	183.118	221.818	286.218	179.841	172.68	208.63	193.186	1	74375194	74386062	+	protein_coding	Slc11a1
ENSMUSG00000064057	69.0169	-0.721727	0.221026	-3.26535	0.00109328	0.00656847	11	49663609	49665118	+	protein_coding	Scgb3a1	ENSMUSG00000064057	11.2514	247.403	24.8869	49.314	24.1598	87.8702	11.7668	13.2326	643.285	29.7875	14.201	13.24	9.78832	34.4206	29.144	28.2367	30.4346	15.7939	27.7086	34.4137	11	49663609	49665118	+	protein_coding	Scgb3a1
ENSMUSG00000016024	584.352	-0.721387	0.219498	-3.28653	0.00101431	0.00615921	2	158306492	158332852	+	protein_coding	Lbp	ENSMUSG00000016024	603.823	1068	396.027	509.578	1365.55	683.066	317.704	755.58	1621.18	609.579	255.618	408.786	372.935	472.251	674.359	631.476	185.374	314.825	121.429	319.891	2	158306492	158332852	+	protein_coding	Lbp
ENSMUSG00000085620	25.6035	-0.721049	0.232928	-3.09558	0.00196426	0.0104584	13	31349900	31408922	-	lncRNA	G630018N14Rik	ENSMUSG00000085620	7.50091	4.89908	27.051	39.4512	94.5383	58.8565	28.8822	15.8791	60.9564	29.7875	7.10049	32.5484	20.5555	30.2902	8.09555	5.77569	13.8339	6.31755	4.88976	14.8605	13	31349900	31408922	-	lncRNA	G630018N14Rik
ENSMUSG00000086382	83.6502	-0.720621	0.155441	-4.63597	3.55e-06	6.2e-05	2	73584849	73589208	+	lncRNA	Chrna1os	ENSMUSG00000086382	66.258	50.2155	97.3836	121.641	129.202	144.24	116.598	104.537	76.5197	161.703	59.1707	76.6818	72.4335	55.073	54.2402	40.4298	67.325	53.6992	70.9015	54.7491	2	73584849	73589208	+	lncRNA	Chrna1os
ENSMUSG00000025934	159.003	-0.720052	0.105296	-6.83837	8.01e-12	1.69e-09	1	21240588	21265661	+	protein_coding	Gsta3	ENSMUSG00000025934	156.269	157.995	154.732	236.707	231.094	251.176	228.918	186.579	206.214	189.363	105.324	145.64	116.481	141.813	99.5752	122.573	94.9929	109.504	123.874	121.23	1	21240588	21265661	+	protein_coding	Gsta3
ENSMUSG00000099966	392.719	-0.719908	0.120392	-5.9797	2.24e-09	1.63e-07	14	20641008	20644048	+	lncRNA	2810402E24Rik	ENSMUSG00000099966	361.294	298.844	569.153	554.509	623.953	499.036	665.359	426.089	407.241	548.94	263.901	303.417	372.935	342.83	325.441	227.819	302.502	247.437	247.748	265.924	14	20641008	20644048	+	lncRNA	2810402E24Rik
ENSMUSG00000086279	16.6477	-0.71978	0.222297	-3.23792	0.00120406	0.00707862	8	46152609	46156100	+	lncRNA	Gm15634	ENSMUSG00000086279	12.5015	4.89908	10.8204	21.9173	37.8153	38.1324	14.9759	27.7884	28.5328	28.7236	15.3844	17.1017	10.7671	16.5219	6.47644	5.13395	4.6113	15.7939	4.88976	10.1677	8	46152609	46156100	+	lncRNA	Gm15634
ENSMUSG00000087222	18.2564	-0.71969	0.18409	-3.90945	9.25e-05	0.000878532	2	75704769	75710024	+	lncRNA	E030042O20Rik	ENSMUSG00000087222	25.003	22.0458	32.4612	26.3008	13.6555	23.211	26.7427	27.7884	15.5633	25.5321	16.5678	12.6884	18.5978	1.37683	15.3815	13.4766	10.1449	13.688	16.2992	8.60343	2	75704769	75710024	+	lncRNA	E030042O20Rik
ENSMUSG00000074934	174.462	-0.719589	0.150648	-4.77661	1.78e-06	3.55e-05	2	113746163	113758646	-	protein_coding	Grem1	ENSMUSG00000074934	170.021	97.9816	238.049	252.049	259.455	291.795	221.43	199.812	339.8	154.257	108.874	127.987	140.952	128.045	120.624	92.4111	106.06	131.616	113.279	194.75	2	113746163	113758646	-	protein_coding	Grem1
ENSMUSG00000113196	95.7955	-0.719447	0.191284	-3.76115	0.000169137	0.00143649	12	98766104	98770355	+	TEC	D230049E03Rik	ENSMUSG00000113196	41.255	46.5412	75.7428	154.517	206.934	169.938	143.341	168.054	80.4106	163.831	67.4546	80.5435	88.0948	82.6096	53.4306	46.2055	74.7031	43.1699	60.307	68.8275	12	98766104	98770355	+	TEC	D230049E03Rik
ENSMUSG00000102761	5.71278	-0.719162	0.233514	-3.07974	0.0020718	0.0109285	1	164681981	164712771	+	lncRNA	Gm37184	ENSMUSG00000102761	3.75045	1.22477	3.24612	6.5752	15.7564	14.0924	8.55767	9.2628	7.78167	12.7661	2.36683	4.41334	7.83065	2.75365	0	1.28349	4.6113	3.15878	3.25984	1.56426	1	164681981	164712771	+	lncRNA	Gm37184
ENSMUSG00000110030	11.5863	-0.719055	0.219609	-3.27425	0.00105943	0.00639642	8	70610424	70612818	+	TEC	Gm45546	ENSMUSG00000110030	5.0006	9.79816	17.3126	21.9173	25.2102	24.8689	14.9759	10.5861	10.3756	17.0214	9.46732	12.6884	11.746	5.5073	1.61911	8.98441	9.22261	4.2117	6.51968	4.69278	8	70610424	70612818	+	TEC	Gm45546
ENSMUSG00000042010	509.846	-0.719028	0.118551	-6.06513	1.32e-09	1.05e-07	5	114146534	114250761	+	protein_coding	Acacb	ENSMUSG00000042010	408.799	472.761	542.102	827.379	720.592	596.854	578.713	793.954	771.682	722.346	352.658	371.272	335.739	329.061	440.398	433.177	335.703	300.084	334.134	529.502	5	114146534	114250761	+	protein_coding	Acacb
ENSMUSG00000050174	140.63	-0.718981	0.138221	-5.20169	1.97e-07	6.08e-06	3	37404909	37420211	-	protein_coding	Nudt6	ENSMUSG00000050174	110.013	123.702	200.177	191.777	238.447	222.991	172.223	138.942	169.9	218.087	63.9044	109.23	106.693	88.1169	117.385	98.1868	110.671	68.4401	139.358	124.359	3	37404909	37420211	-	protein_coding	Nudt6
ENSMUSG00000117238	57.9663	-0.718426	0.204252	-3.51735	0.000435882	0.00309296	7	12623787	12640299	-	lncRNA	AC139131.1	ENSMUSG00000117238	35.0042	13.4725	45.4457	85.4776	86.1349	107.765	127.295	68.8094	72.6289	124.469	46.1532	47.9951	44.0474	44.0584	19.4293	35.9376	32.2791	25.2702	55.4173	42.235	7	12623787	12640299	-	lncRNA	AC139131.1
ENSMUSG00000089827	19.2364	-0.717968	0.198909	-3.60952	0.000306761	0.00233283	13	80884223	80885524	-	lncRNA	1700023H06Rik	ENSMUSG00000089827	8.75106	33.0688	28.1331	13.1504	32.5632	24.04	42.7884	18.5256	25.9389	26.596	13.0176	12.1367	9.78832	12.3914	9.71466	21.8193	13.8339	11.5822	7.33464	19.5533	13	80884223	80885524	-	lncRNA	1700023H06Rik
ENSMUSG00000019577	926.833	-0.717779	0.144685	-4.96099	7.01e-07	1.67e-05	6	5483350	5496309	-	protein_coding	Pdk4	ENSMUSG00000019577	928.862	1304.38	842.91	787.928	1133.41	858.807	1658.05	1045.37	2008.97	1219.16	564.489	850.672	947.509	813.704	651.692	567.943	551.512	531.727	489.791	779.784	6	5483350	5496309	-	protein_coding	Pdk4
ENSMUSG00000104187	14.061	-0.717572	0.230292	-3.11592	0.00183369	0.00989734	14	61683509	61685656	+	TEC	Gm37820	ENSMUSG00000104187	10.0012	4.89908	6.49224	32.876	23.1094	20.7241	40.649	18.5256	6.48472	34.0428	4.73366	14.895	9.78832	5.5073	11.3338	3.85046	1.84452	11.5822	8.1496	11.732	14	61683509	61685656	+	TEC	Gm37820
ENSMUSG00000115326	7.88598	-0.716701	0.233003	-3.07593	0.00209849	0.0110426	15	37892994	37899716	-	lncRNA	Gm35019	ENSMUSG00000115326	12.5015	11.0229	5.4102	23.0132	8.4034	5.80275	4.27884	29.1117	5.18778	9.57454	4.73366	5.51668	2.93649	1.37683	3.23822	1.28349	6.45583	1.05293	9.77952	7.03917	15	37892994	37899716	-	lncRNA	Gm35019
ENSMUSG00000045193	9026.03	-0.716601	0.127663	-5.61321	1.99e-08	9.57e-07	10	80165984	80172786	+	protein_coding	Cirbp	ENSMUSG00000045193	8094.73	5632.71	11417.7	14243	13890.8	13668	12593.7	11984.7	10363.9	12192.6	6204.64	8203.3	9272.47	7302.68	5130.15	5266.15	5657.15	6158.56	6538.42	6705.2	10	80165984	80172786	+	protein_coding	Cirbp
ENSMUSG00000084925	181.352	-0.716501	0.103868	-6.89819	5.27e-12	1.19e-09	14	20546078	20570687	+	lncRNA	1810062O18Rik	ENSMUSG00000084925	172.521	172.692	213.162	241.091	248.951	284.335	235.336	211.721	287.922	207.448	147.927	150.605	134.1	162.465	136.815	147.601	98.6819	143.198	110.02	120.448	14	20546078	20570687	+	lncRNA	1810062O18Rik
ENSMUSG00000009772	107.169	-0.715795	0.151463	-4.72588	2.29e-06	4.37e-05	1	132316125	132333488	+	protein_coding	Nuak2	ENSMUSG00000009772	70.0085	148.197	119.024	117.258	138.656	180.714	177.572	78.0722	212.699	123.405	57.9873	94.3352	77.3277	96.3778	102.004	68.6666	65.4805	67.3872	67.6417	80.5594	1	132316125	132333488	+	protein_coding	Nuak2
ENSMUSG00000109062	3.60838	-0.715791	0.233437	-3.06632	0.00216715	0.0113377	8	8735969	8755337	+	lncRNA	Gm44622	ENSMUSG00000109062	5.0006	4.89908	6.49224	5.47933	6.30255	4.14482	4.27884	0	10.3756	6.38303	1.18341	2.20667	4.89416	2.75365	0.809555	1.28349	0.922261	0	1.62992	3.12852	8	8735969	8755337	+	lncRNA	Gm44622
ENSMUSG00000028885	187.352	-0.715498	0.180555	-3.96276	7.41e-05	0.00073033	4	132732965	132757252	-	protein_coding	Smpdl3b	ENSMUSG00000028885	130.016	85.7339	243.459	220.269	375.002	344.849	285.612	214.368	303.485	221.278	110.058	191.98	194.787	184.495	80.1459	86.6354	136.495	81.0752	115.724	141.566	4	132732965	132757252	-	protein_coding	Smpdl3b
ENSMUSG00000071633	20.3267	-0.7154	0.204306	-3.50161	0.00046245	0.00323725	19	12599973	12628251	+	protein_coding	Gm4952	ENSMUSG00000071633	33.7541	15.922	17.3126	19.7256	31.5128	33.9875	27.8124	26.4651	23.345	38.2982	4.73366	10.4817	30.3438	16.5219	6.47644	8.98441	11.9894	11.5822	13.0394	24.246	19	12599973	12628251	+	protein_coding	Gm4952
ENSMUSG00000058914	15.0476	-0.715229	0.20399	-3.5062	0.000454561	0.00319078	15	10952331	10980150	+	protein_coding	C1qtnf3	ENSMUSG00000058914	11.2514	12.2477	21.6408	19.7256	21.0085	38.1324	9.62738	18.5256	22.0481	24.4683	10.6507	14.895	7.83065	11.0146	11.3338	8.34267	4.6113	9.47633	16.2992	7.8213	15	10952331	10980150	+	protein_coding	C1qtnf3
ENSMUSG00000109032	105.688	-0.715152	0.162388	-4.40397	1.06e-05	0.0001511	9	75468615	75486681	+	transcribed_unprocessed_pseudogene	Gm7972	ENSMUSG00000109032	55.0066	74.7109	107.122	144.654	119.749	231.281	152.968	165.407	151.743	151.065	55.6205	91.5769	58.7299	86.74	69.6217	102.679	69.1696	76.8635	69.2716	79.7773	9	75468615	75486681	+	transcribed_unprocessed_pseudogene	Gm7972
ENSMUSG00000071192	168.403	-0.714824	0.175424	-4.07485	4.6e-05	0.000494616	17	25877627	25880858	-	protein_coding	Wfikkn1	ENSMUSG00000071192	142.517	96.7568	124.435	234.515	279.413	266.926	210.733	231.57	369.629	214.895	87.5727	143.434	206.533	147.32	68.0026	77.0092	121.738	108.451	126.319	110.28	17	25877627	25880858	-	protein_coding	Wfikkn1
ENSMUSG00000111039	3.81531	-0.714713	0.233417	-3.06196	0.00219891	0.0114726	9	104101134	104101613	+	TEC	Gm47000	ENSMUSG00000111039	5.0006	7.34862	4.32816	3.2876	6.30255	9.11861	2.13942	7.93954	3.89083	7.44687	0	2.75834	5.87299	0	0	1.92523	1.84452	3.15878	0.81496	3.12852	9	104101134	104101613	+	TEC	Gm47000
ENSMUSG00000041044	2.63968	-0.714613	0.227042	-3.14749	0.00164681	0.00907894	14	37054829	37064946	+	protein_coding	Lrit1	ENSMUSG00000041044	6.25075	4.89908	4.32816	2.19173	4.2017	6.63171	2.13942	2.64651	2.59389	6.38303	0	1.10334	0	0	1.61911	0.641744	5.53356	0	1.62992	0	14	37054829	37064946	+	protein_coding	Lrit1
ENSMUSG00000021208	3.55958	-0.714365	0.224583	-3.18085	0.00146844	0.00828026	12	103450897	103457223	-	protein_coding	Ifi27l2b	ENSMUSG00000021208	2.5003	0	3.24612	6.5752	11.5547	5.80275	7.48797	13.2326	0	7.44687	1.18341	3.86168	0	1.37683	2.42866	0	1.84452	1.05293	0.81496	0.78213	12	103450897	103457223	-	protein_coding	Ifi27l2b
ENSMUSG00000064602	20.4669	-0.713448	0.173507	-4.11192	3.92e-05	0.000433821	1	63179003	63179135	+	snoRNA	Snora41	ENSMUSG00000064602	21.2526	12.2477	29.2151	28.4925	24.1598	25.6979	28.8822	33.0814	28.5328	31.9151	9.46732	14.895	11.746	15.1451	16.1911	14.7601	18.4452	21.0585	17.1142	7.03917	1	63179003	63179135	+	snoRNA	Snora41
ENSMUSG00000085984	38.0016	-0.713083	0.180924	-3.94134	8.1e-05	0.000784609	14	66295333	66297129	-	lncRNA	1700001G11Rik	ENSMUSG00000085984	43.7553	41.6422	66.0045	49.314	35.7145	30.6717	70.6008	60.8698	31.1267	61.7026	27.2185	26.4801	36.2168	13.7683	30.7631	10.2679	34.1236	41.0641	25.2638	23.4639	14	66295333	66297129	-	lncRNA	1700001G11Rik
ENSMUSG00000086172	21.2218	-0.712776	0.204254	-3.48966	0.000483633	0.00336708	4	106554668	106557897	-	lncRNA	2700068H02Rik	ENSMUSG00000086172	21.2526	14.6972	11.9024	28.4925	48.3196	33.9875	38.5095	30.4349	14.2664	39.362	9.46732	17.1017	26.4285	8.26096	11.3338	19.2523	11.0671	8.4234	14.6693	17.2069	4	106554668	106557897	-	lncRNA	2700068H02Rik
ENSMUSG00000068601	51.2761	-0.712538	0.17131	-4.15934	3.19e-05	0.000369119	6	39419886	39421294	+	lncRNA	Gm10244	ENSMUSG00000068601	40.0048	30.6192	46.5277	96.4363	85.0845	78.7516	86.6465	48.9605	59.6595	84.0432	47.3366	36.9617	32.3014	48.1889	21.0484	35.2959	41.5017	37.9053	24.4488	43.7993	6	39419886	39421294	+	lncRNA	Gm10244
ENSMUSG00000073879	4.3368	-0.712527	0.22993	-3.09889	0.00194249	0.0103714	4	42236858	42239182	+	unprocessed_pseudogene	Gm5859	ENSMUSG00000073879	10.0012	4.89908	5.4102	3.2876	4.2017	6.63171	8.55767	9.2628	2.59389	11.7022	2.36683	4.41334	0	9.63778	0	1.28349	0.922261	0	0	1.56426	4	42236858	42239182	+	unprocessed_pseudogene	Gm5859
ENSMUSG00000099054	10.2813	-0.71217	0.223581	-3.18529	0.00144608	0.0081843	15	66286916	66290243	+	lncRNA	Gm27242	ENSMUSG00000099054	7.50091	13.4725	29.2151	15.3421	10.5043	14.0924	11.7668	11.9093	12.9694	12.7661	9.46732	3.31001	16.6401	2.75365	2.42866	3.85046	3.68904	9.47633	9.77952	4.69278	15	66286916	66290243	+	lncRNA	Gm27242
ENSMUSG00000005107	126.714	-0.712167	0.160343	-4.44153	8.93e-06	0.000131311	5	38349272	38503143	-	protein_coding	Slc2a9	ENSMUSG00000005107	88.7607	111.454	157.978	234.515	165.967	202.267	202.175	138.942	128.398	189.363	88.7561	101.507	156.613	70.2181	70.4313	100.112	45.1908	75.8106	100.24	105.588	5	38349272	38503143	-	protein_coding	Slc2a9
ENSMUSG00000045350	20.6627	-0.711112	0.188186	-3.77877	0.000157602	0.00135371	15	99918347	99967061	-	protein_coding	Fam186a	ENSMUSG00000045350	12.5015	23.2706	35.7073	26.3008	43.0674	22.382	16.0456	26.4651	29.8297	32.979	9.46732	14.3434	20.5555	13.7683	15.3815	17.9688	16.6007	18.9527	11.4094	6.25704	15	99918347	99967061	-	protein_coding	Fam186a
ENSMUSG00000115250	3.76975	-0.710957	0.227912	-3.11944	0.00181197	0.00980946	14	55127316	55128391	+	TEC	Gm49020	ENSMUSG00000115250	2.5003	7.34862	4.32816	16.438	7.35298	8.28964	4.27884	7.93954	0	1.06384	2.36683	1.10334	1.95766	0	1.61911	2.56697	4.6113	0	1.62992	0	14	55127316	55128391	+	TEC	Gm49020
ENSMUSG00000114329	5.87598	-0.710883	0.232887	-3.05248	0.0022696	0.0117734	13	36963238	36973329	+	lncRNA	Gm30489	ENSMUSG00000114329	8.75106	7.34862	4.32816	6.5752	21.0085	6.63171	5.34855	2.64651	14.2664	11.7022	0	5.51668	7.83065	0	6.47644	1.28349	4.6113	0	1.62992	1.56426	13	36963238	36973329	+	lncRNA	Gm30489
ENSMUSG00000114541	4.79414	-0.710787	0.232945	-3.05131	0.00227847	0.0118093	13	90179216	90217142	-	lncRNA	Gm29680	ENSMUSG00000114541	8.75106	3.67431	2.16408	6.5752	7.35298	16.5793	7.48797	6.61629	3.89083	5.31919	4.73366	2.20667	4.89416	0	4.04777	1.28349	1.84452	2.10585	2.44488	3.91065	13	90179216	90217142	-	lncRNA	Gm29680
ENSMUSG00000035041	93.1625	-0.710779	0.132244	-5.37474	7.67e-08	2.8e-06	10	81084323	81098874	-	protein_coding	Creb3l3	ENSMUSG00000035041	110.013	90.6329	115.778	140.271	150.211	155.016	96.2738	103.214	98.5678	113.831	78.1054	87.1635	71.4547	78.4791	54.2402	40.4298	58.1024	85.2869	79.8661	56.3134	10	81084323	81098874	-	protein_coding	Creb3l3
ENSMUSG00000045802	9.97531	-0.710558	0.233458	-3.04362	0.00233747	0.0120458	X	96306177	96456294	-	protein_coding	Hsf3	ENSMUSG00000045802	5.0006	4.89908	6.49224	21.9173	23.1094	14.9214	19.2548	21.1721	15.5633	14.8937	4.73366	13.24	11.746	5.5073	1.61911	0	1.84452	0	7.33464	6.25704	X	96306177	96456294	-	protein_coding	Hsf3
ENSMUSG00000111118	90.8118	-0.710217	0.151219	-4.69662	2.64e-06	4.92e-05	19	12528754	12530540	-	processed_pseudogene	Gm6545	ENSMUSG00000111118	78.7595	100.431	101.712	135.887	103.992	155.845	135.853	96.5978	71.332	171.278	78.1054	60.1318	82.2218	92.2473	55.0497	66.0996	34.1236	62.1226	56.2322	78.213	19	12528754	12530540	-	processed_pseudogene	Gm6545
ENSMUSG00000108337	2.19181	-0.710208	0.219617	-3.23384	0.00122136	0.00716111	7	73685493	73686601	-	processed_pseudogene	Gm4971	ENSMUSG00000108337	7.50091	4.89908	2.16408	4.38347	5.25213	3.31586	2.13942	0	2.59389	4.25535	1.18341	0	1.95766	0	0	0	1.84452	0	0	2.34639	7	73685493	73686601	-	processed_pseudogene	Gm4971
ENSMUSG00000052496	86.0708	-0.710144	0.178238	-3.98425	6.77e-05	0.000676873	15	85814669	85821734	-	protein_coding	Pkdrej	ENSMUSG00000052496	72.5088	71.0366	55.1841	113.97	212.186	91.1861	126.226	79.3954	129.694	159.576	52.0702	41.3751	60.6876	66.0876	84.1937	94.3363	48.8798	40.0112	58.6771	64.1347	15	85814669	85821734	-	protein_coding	Pkdrej
ENSMUSG00000029445	5.03003	-0.710001	0.23274	-3.05062	0.00228368	0.0118283	5	123171806	123182727	-	protein_coding	Hpd	ENSMUSG00000029445	7.50091	12.2477	2.16408	8.76693	6.30255	14.0924	6.41826	5.29303	7.78167	5.31919	2.36683	7.72335	3.91533	2.75365	3.23822	0.641744	0	0	4.0748	0	5	123171806	123182727	-	protein_coding	Hpd
ENSMUSG00000039395	475.09	-0.709836	0.11597	-6.12086	9.31e-10	8.01e-08	1	72159441	72212307	-	protein_coding	Mreg	ENSMUSG00000039395	545.066	382.128	604.861	546.838	592.44	617.578	676.056	571.647	651.066	784.049	345.557	359.136	454.178	400.656	286.582	248.997	418.706	233.749	397.7	384.808	1	72159441	72212307	-	protein_coding	Mreg
ENSMUSG00000084738	7.33452	-0.709468	0.228089	-3.11049	0.00186778	0.0100477	15	34288818	34288870	-	snoRNA	Gm25809	ENSMUSG00000084738	5.0006	6.12385	14.0665	4.38347	15.7564	9.94757	9.62738	9.2628	14.2664	13.8299	4.73366	8.82669	0.978832	2.75365	2.42866	1.92523	9.22261	3.15878	5.70472	4.69278	15	34288818	34288870	-	snoRNA	Gm25809
ENSMUSG00000078519	82.6014	-0.709109	0.164713	-4.30511	1.67e-05	0.000216462	4	138215713	138216189	+	lncRNA	2310026L22Rik	ENSMUSG00000078519	76.2592	53.8899	98.4657	151.23	138.656	145.898	140.132	96.5978	60.9564	93.6177	48.52	67.8551	73.4124	71.595	51.8115	44.2803	72.8586	36.8524	79.8661	49.2742	4	138215713	138216189	+	lncRNA	2310026L22Rik
ENSMUSG00000089736	251.402	-0.709	0.137991	-5.13802	2.78e-07	7.97e-06	8	4248213	4251423	+	protein_coding	Tgfbr3l	ENSMUSG00000089736	175.021	203.312	217.49	347.39	452.733	435.206	310.216	378.452	352.769	307.449	173.962	185.36	266.242	169.35	174.864	147.601	176.152	183.209	168.697	202.572	8	4248213	4251423	+	protein_coding	Tgfbr3l
ENSMUSG00000113200	22.5434	-0.70888	0.190072	-3.72954	0.000191832	0.00159671	12	111091199	111093941	+	TEC	Gm48632	ENSMUSG00000113200	27.5033	14.6972	18.3947	19.7256	21.0085	47.251	43.8581	44.9907	23.345	32.979	7.10049	20.4117	18.5978	17.8987	17.8102	12.8349	14.7562	12.6351	16.2992	18.7711	12	111091199	111093941	+	TEC	Gm48632
ENSMUSG00000037913	16.3581	-0.708651	0.212843	-3.32946	0.000870161	0.00544241	5	65054345	65092132	-	protein_coding	Tmem156	ENSMUSG00000037913	20.0024	17.1468	19.4767	16.438	7.35298	17.4082	18.1851	11.9093	59.6595	30.8513	10.6507	5.51668	11.746	11.0146	12.9529	9.62615	11.9894	10.5293	11.4094	13.2962	5	65054345	65092132	-	protein_coding	Tmem156
ENSMUSG00000117269	13.1461	-0.708225	0.230169	-3.07697	0.00209116	0.0110154	17	46407003	46407484	-	processed_pseudogene	Gm9706	ENSMUSG00000117269	5.0006	6.12385	11.9024	14.2463	26.2606	20.7241	22.4639	37.0512	20.7511	20.2129	2.36683	8.82669	7.83065	9.63778	14.572	14.1184	0	4.2117	4.88976	11.732	17	46407003	46407484	-	processed_pseudogene	Gm9706
ENSMUSG00000030254	435.407	-0.707742	0.142655	-4.9612	7.01e-07	1.67e-05	6	112619849	112696686	-	protein_coding	Rad18	ENSMUSG00000030254	355.043	284.146	452.293	486.565	775.214	765.134	699.59	570.324	482.463	647.877	243.783	393.891	425.792	254.713	322.203	358.093	270.222	248.49	321.909	350.394	6	112619849	112696686	-	protein_coding	Rad18
ENSMUSG00000052281	29.0003	-0.707369	0.184351	-3.83707	0.000124511	0.0011138	7	142988968	143008033	-	lncRNA	Tspan32os	ENSMUSG00000052281	22.5027	28.1697	24.8869	24.1091	63.0255	39.7903	52.4158	42.3442	45.3931	30.8513	14.201	19.86	29.3649	39.928	17.0006	18.6106	13.8339	17.8997	15.4842	20.3354	7	142988968	143008033	-	lncRNA	Tspan32os
ENSMUSG00000115026	60.0623	-0.70703	0.163855	-4.31498	1.6e-05	0.000209679	6	39207067	39207611	+	lncRNA	Gm49041	ENSMUSG00000115026	63.7577	42.8669	81.153	98.628	100.841	89.5281	87.7162	55.5768	66.1442	79.7879	34.319	50.7534	82.2218	53.6962	44.5255	28.8785	43.3463	29.4819	38.3031	29.721	6	39207067	39207611	+	lncRNA	Gm49041
ENSMUSG00000101234	18.201	-0.706957	0.226619	-3.11959	0.00181102	0.00980606	16	31376505	31379133	-	transcribed_processed_pseudogene	1700007E05Rik	ENSMUSG00000101234	10.0012	9.79816	15.1486	43.8347	31.5128	46.422	28.8822	21.1721	11.6725	31.9151	3.55024	13.24	23.492	11.0146	6.47644	5.13395	9.22261	4.2117	13.8543	23.4639	16	31376505	31379133	-	transcribed_processed_pseudogene	1700007E05Rik
ENSMUSG00000047343	30.5538	-0.706844	0.209753	-3.36989	0.00075197	0.00482934	1	44009407	44020034	-	protein_coding	Mettl21c	ENSMUSG00000047343	7.50091	15.922	27.051	44.9305	75.6306	53.8827	41.7187	55.5768	42.7992	40.4258	11.8341	31.4451	22.5131	35.7975	18.6198	21.1775	18.4452	11.5822	14.6693	19.5533	1	44009407	44020034	-	protein_coding	Mettl21c
ENSMUSG00000114106	11.5128	-0.706663	0.208591	-3.38779	0.000704573	0.00458062	12	102764322	102764712	-	processed_pseudogene	Gm47042	ENSMUSG00000114106	5.0006	8.57339	15.1486	26.3008	19.9581	17.4082	13.9062	17.2023	7.78167	20.2129	9.46732	4.96501	8.80948	8.26096	5.66688	9.62615	5.53356	10.5293	6.51968	9.38556	12	102764322	102764712	-	processed_pseudogene	Gm47042
ENSMUSG00000118526	20.9932	-0.706603	0.213259	-3.31336	0.000921828	0.00570041	2	168114876	168172664	+	unitary_pseudogene	AL831766.1	ENSMUSG00000118526	17.5021	9.79816	18.3947	23.0132	48.3196	52.2247	27.8124	46.314	27.2358	9.57454	15.3844	17.1017	16.6401	15.1451	21.0484	14.1184	7.37809	7.37048	11.4094	14.0783	2	168114876	168172664	+	unitary_pseudogene	AL831766.1
ENSMUSG00000071001	81.9522	-0.706549	0.134668	-5.24659	1.55e-07	5e-06	4	43727187	43728639	+	protein_coding	Hrct1	ENSMUSG00000071001	68.7583	100.431	67.0865	86.5735	136.555	114.397	104.832	92.628	163.415	101.065	66.2712	68.4068	56.7722	49.5657	44.5255	55.1899	71.0141	66.3343	60.307	64.9168	4	43727187	43728639	+	protein_coding	Hrct1
ENSMUSG00000037321	366.046	-0.706244	0.108888	-6.48596	8.82e-11	1.23e-08	17	34187552	34197225	+	protein_coding	Tap1	ENSMUSG00000037321	407.549	329.463	511.805	492.044	548.322	400.39	561.597	395.654	448.743	492.557	253.251	257.077	238.835	315.293	226.675	195.732	285.901	247.437	351.248	361.344	17	34187552	34197225	+	protein_coding	Tap1
ENSMUSG00000107287	3.40876	-0.705971	0.232775	-3.03284	0.00242262	0.0124095	5	34309211	34327530	-	lncRNA	Gm43458	ENSMUSG00000107287	3.75045	4.89908	4.32816	10.9587	1.05043	5.80275	4.27884	6.61629	3.89083	5.31919	5.91707	1.655	0.978832	1.37683	0.809555	2.56697	0	0	1.62992	2.34639	5	34309211	34327530	-	lncRNA	Gm43458
ENSMUSG00000008874	2.49159	-0.705495	0.20972	-3.36399	0.000768245	0.00491532	8	114418085	114425846	+	protein_coding	Clec3a	ENSMUSG00000008874	1.25015	11.0229	8.65632	4.38347	3.15128	5.80275	7.48797	0	2.59389	0	1.18341	2.20667	0	0	0.809555	1.28349	0	0	0	0	8	114418085	114425846	+	protein_coding	Clec3a
ENSMUSG00000094958	81.4343	-0.705209	0.118448	-5.95375	2.62e-09	1.83e-07	4	108719648	108781904	+	protein_coding	3110021N24Rik	ENSMUSG00000094958	71.2586	73.4862	106.04	79.9983	107.143	107.765	117.668	111.154	112.834	135.107	62.721	73.9235	71.4547	57.8267	54.2402	46.2055	61.7915	63.1755	56.2322	58.6598	4	108719648	108781904	+	protein_coding	3110021N24Rik
ENSMUSG00000087592	3.06137	-0.704978	0.224996	-3.13328	0.00172863	0.00944336	4	83383063	83392205	+	lncRNA	Gm11184	ENSMUSG00000087592	5.0006	0	0	3.2876	6.30255	8.28964	5.34855	10.5861	5.18778	5.31919	1.18341	0.551668	2.93649	0	1.61911	0.641744	1.84452	0	0	3.12852	4	83383063	83392205	+	lncRNA	Gm11184
ENSMUSG00000102788	27.479	-0.704488	0.205203	-3.43313	0.000596658	0.00399875	1	110957830	110960826	-	TEC	Gm38255	ENSMUSG00000102788	20.0024	36.7431	14.0665	32.876	26.2606	34.8165	58.834	38.3745	68.7381	31.9151	9.46732	20.4117	13.7036	30.2902	14.572	12.8349	12.9117	18.9527	15.4842	38.3244	1	110957830	110960826	-	TEC	Gm38255
ENSMUSG00000024659	116.543	-0.70443	0.198857	-3.5424	0.000396503	0.00287001	19	20373427	20390944	-	protein_coding	Anxa1	ENSMUSG00000024659	96.2616	101.656	174.209	60.2727	184.875	184.03	116.598	121.74	357.957	129.788	61.5376	59.0285	79.2854	56.4499	133.577	111.663	38.735	128.457	83.1259	51.6206	19	20373427	20390944	-	protein_coding	Anxa1
ENSMUSG00000116657	39.7307	-0.703789	0.206286	-3.41171	0.00064556	0.00427034	17	27545706	27556518	-	lncRNA	Gm49774	ENSMUSG00000116657	23.7529	17.1468	35.7073	88.7652	96.6391	81.2385	53.4855	55.5768	32.4236	39.362	21.3015	29.2384	31.3226	24.7829	12.9529	17.9688	43.3463	21.0585	31.7834	36.7601	17	27545706	27556518	-	lncRNA	Gm49774
ENSMUSG00000043993	473.679	-0.702958	0.12811	-5.48714	4.08e-08	1.73e-06	11	120229801	120231585	-	lncRNA	2900052L18Rik	ENSMUSG00000043993	341.291	341.711	652.47	658.616	734.247	729.488	709.217	473.726	621.237	701.069	310.055	369.617	406.215	356.598	361.061	252.205	307.113	342.201	442.523	362.908	11	120229801	120231585	-	lncRNA	2900052L18Rik
ENSMUSG00000036181	2216.93	-0.702925	0.19058	-3.68835	0.000225713	0.00181703	13	23738807	23740367	+	protein_coding	H1f2	ENSMUSG00000036181	2104	3230.94	3225.56	1793.93	2550.43	2048.37	2841.15	2543.3	6347.25	2121.29	2688.72	1037.14	1393.86	1343.78	1089.66	845.818	1729.24	1202.44	2175.13	2026.5	13	23738807	23740367	+	protein_coding	H1f2
ENSMUSG00000112254	50.6038	-0.702915	0.199271	-3.52744	0.000419603	0.00299617	12	75505799	75508745	-	TEC	Gm47690	ENSMUSG00000112254	31.2538	26.9449	42.1996	52.6016	90.3366	130.147	71.6705	104.537	49.2839	64.8941	35.5024	48.5468	35.2379	11.0146	37.2395	34.6542	44.2685	26.3231	27.7086	47.7099	12	75505799	75508745	-	TEC	Gm47690
ENSMUSG00000074039	105.764	-0.702809	0.135174	-5.1993	2e-07	6.14e-06	9	114368302	114377229	+	lncRNA	4930520O04Rik	ENSMUSG00000074039	102.512	84.5091	108.204	144.654	120.799	128.489	163.666	132.326	145.258	205.321	65.0878	69.5102	77.3277	61.9572	79.3364	61.6074	88.537	67.3872	96.1653	112.627	9	114368302	114377229	+	lncRNA	4930520O04Rik
ENSMUSG00000039480	201.831	-0.702205	0.114451	-6.13542	8.49e-10	7.55e-08	10	34288287	34418552	-	protein_coding	Nt5dc1	ENSMUSG00000039480	236.279	197.188	207.752	252.049	266.808	274.387	346.586	173.347	284.031	291.492	178.696	147.847	146.825	133.552	152.196	107.171	157.707	132.669	146.693	203.354	10	34288287	34418552	-	protein_coding	Nt5dc1
ENSMUSG00000083404	2.34889	-0.702199	0.21342	-3.29022	0.00100108	0.00608973	4	139342182	139343333	+	unprocessed_pseudogene	Gm13019	ENSMUSG00000083404	0	3.67431	0	7.67107	2.10085	6.63171	2.13942	2.64651	5.18778	10.6384	0	0.551668	0	1.37683	1.61911	1.92523	0	0	0.81496	0	4	139342182	139343333	+	unprocessed_pseudogene	Gm13019
ENSMUSG00000021238	5064.6	-0.702111	0.0716124	-9.80433	1.08e-22	4.72e-19	12	84430716	84451004	-	protein_coding	Aldh6a1	ENSMUSG00000021238	4721.82	5564.13	5847.35	6407.53	6990.58	7108.37	7280.44	5724.41	6362.81	7006.44	3781.01	4103.86	3960.35	4265.41	3521.56	3622.64	3557.16	3567.31	3593.97	4304.85	12	84430716	84451004	-	protein_coding	Aldh6a1
ENSMUSG00000037355	1962.88	-0.70191	0.111299	-6.30652	2.85e-10	3.15e-08	5	33378548	33419754	+	protein_coding	Uvssa	ENSMUSG00000037355	1686.45	1582.4	1995.28	2652	3063.04	3297.62	3062.58	2401.71	2123.1	2734.06	1369.21	1714.03	1488.8	1518.64	1378.67	1390.66	1194.33	1650.99	1378.1	1575.99	5	33378548	33419754	+	protein_coding	Uvssa
ENSMUSG00000117278	19.2755	-0.701805	0.228342	-3.07348	0.00211578	0.0110975	17	13330747	13333842	+	lncRNA	Gm36684	ENSMUSG00000117278	5.0006	14.6972	14.0665	69.0396	26.2606	43.1061	25.673	31.7582	11.6725	24.4683	5.91707	3.31001	17.619	11.0146	7.28599	10.9096	8.30035	24.2173	17.1142	14.0783	17	13330747	13333842	+	lncRNA	Gm36684
ENSMUSG00000034522	887.792	-0.701386	0.0900647	-7.78758	6.83e-15	3.74e-12	14	65358388	65398930	+	protein_coding	Zfp395	ENSMUSG00000034522	895.108	921.027	1205.39	991.759	1310.93	1242.62	1347.83	1005.68	1197.08	955.327	660.345	706.687	786.981	696.674	607.976	485.158	673.25	599.114	748.133	718.778	14	65358388	65398930	+	protein_coding	Zfp395
ENSMUSG00000055884	1551.38	-0.700944	0.108466	-6.46234	1.03e-10	1.41e-08	12	65075602	65132058	+	protein_coding	Fancm	ENSMUSG00000055884	1386.42	1257.84	1638.21	2032.83	2540.98	2524.2	2244.25	1957.1	1648.42	2193.63	1124.24	1351.03	1300.87	1145.52	1065.37	1162.2	926.872	1140.32	1075.75	1311.63	12	65075602	65132058	+	protein_coding	Fancm
ENSMUSG00000055424	27.1262	-0.700864	0.193766	-3.61706	0.000297963	0.00227495	5	31240465	31241232	-	lncRNA	Gm9970	ENSMUSG00000055424	25.003	23.2706	11.9024	56.9851	36.7649	33.1586	47.0672	41.021	27.2358	50.0004	15.3844	15.9984	36.2168	16.5219	20.2389	14.7601	22.1343	21.0585	10.5945	17.2069	5	31240465	31241232	-	lncRNA	Gm9970
ENSMUSG00000107121	135.764	-0.700822	0.154026	-4.55003	5.36e-06	8.71e-05	5	115631048	115631816	-	lncRNA	1110006O24Rik	ENSMUSG00000107121	107.513	67.3623	140.665	232.324	230.043	213.873	210.733	178.64	173.791	167.023	87.5727	106.472	131.163	133.552	73.6695	82.7849	103.293	101.081	79.8661	93.8556	5	115631048	115631816	-	lncRNA	1110006O24Rik
ENSMUSG00000113195	18.1164	-0.700621	0.222163	-3.15363	0.00161253	0.00893656	12	100621675	100623733	-	TEC	Gm48586	ENSMUSG00000113195	2.5003	13.4725	18.3947	28.4925	43.0674	20.7241	28.8822	10.5861	49.2839	29.7875	7.10049	15.4467	9.78832	22.0292	12.9529	9.62615	7.37809	9.47633	16.2992	7.03917	12	100621675	100623733	-	TEC	Gm48586
ENSMUSG00000060591	257.834	-0.700595	0.146466	-4.78333	1.72e-06	3.46e-05	7	140954836	140955987	-	protein_coding	Ifitm2	ENSMUSG00000060591	246.28	301.293	288.905	296.98	450.633	350.652	277.055	185.256	596.595	269.151	158.578	152.812	231.004	273.988	180.531	195.09	146.639	196.897	197.22	161.119	7	140954836	140955987	-	protein_coding	Ifitm2
ENSMUSG00000080760	3.73778	-0.700227	0.225257	-3.10858	0.0018799	0.010097	6	147173480	147175116	+	processed_pseudogene	Gm7571	ENSMUSG00000080760	8.75106	1.22477	8.65632	9.8628	5.25213	4.14482	3.20913	2.64651	14.2664	2.12768	0	2.75834	4.89416	1.37683	3.23822	0	0	0	0	2.34639	6	147173480	147175116	+	processed_pseudogene	Gm7571
ENSMUSG00000006585	177.288	-0.699415	0.119312	-5.86204	4.57e-09	2.87e-07	8	122568014	122573554	+	protein_coding	Cdt1	ENSMUSG00000006585	180.022	164.119	199.095	235.611	248.951	328.27	235.336	195.842	229.559	204.257	145.56	120.264	185.978	144.567	121.433	126.423	86.6925	111.61	150.768	131.398	8	122568014	122573554	+	protein_coding	Cdt1
ENSMUSG00000026976	2.54524	-0.699413	0.201024	-3.47925	0.000502822	0.0034715	2	24420559	24475599	-	protein_coding	Pax8	ENSMUSG00000026976	2.5003	1.22477	0	4.38347	1.05043	3.31586	6.41826	6.61629	12.9694	8.5107	0	0	3.91533	0	0	0	0	0	0	0	2	24420559	24475599	-	protein_coding	Pax8
ENSMUSG00000097228	16.2995	-0.699367	0.21628	-3.23362	0.00122233	0.00716421	5	147399553	147401917	+	lncRNA	Gm26597	ENSMUSG00000097228	7.50091	7.34862	16.2306	28.4925	39.9162	29.0137	36.3701	11.9093	18.1572	23.4044	7.10049	14.895	11.746	6.88413	10.5242	6.41744	6.45583	11.5822	18.7441	13.2962	5	147399553	147401917	+	lncRNA	Gm26597
ENSMUSG00000027547	10.3618	-0.699356	0.22968	-3.04491	0.00232747	0.0120003	2	168748331	168767943	-	protein_coding	Sall4	ENSMUSG00000027547	10.0012	9.79816	17.3126	8.76693	31.5128	20.7241	14.9759	5.29303	18.1572	8.5107	4.73366	6.62001	9.78832	0	6.47644	8.34267	4.6113	0	12.2244	9.38556	2	168748331	168767943	-	protein_coding	Sall4
ENSMUSG00000112813	12.756	-0.699354	0.211093	-3.31302	0.00092295	0.00570505	10	71287728	71292483	+	lncRNA	Gm34376	ENSMUSG00000112813	10.0012	22.0458	6.49224	26.3008	27.3111	11.6055	26.7427	13.2326	12.9694	12.7661	11.8341	12.1367	7.83065	8.26096	12.1433	7.70092	4.6113	8.4234	4.88976	7.8213	10	71287728	71292483	+	lncRNA	Gm34376
ENSMUSG00000021997	5.86965	-0.699268	0.233215	-2.99839	0.00271414	0.0135569	14	75084302	75130881	-	protein_coding	Lrrc63	ENSMUSG00000021997	5.0006	2.44954	4.32816	5.47933	19.9581	6.63171	5.34855	14.5558	10.3756	12.7661	0	4.41334	7.83065	4.13048	4.04777	0	3.68904	0	3.25984	3.12852	14	75084302	75130881	-	protein_coding	Lrrc63
ENSMUSG00000019851	335.42	-0.699214	0.0949869	-7.36116	1.82e-13	6.9e-11	10	18845019	18857073	+	protein_coding	Perp	ENSMUSG00000019851	328.79	439.692	496.657	328.76	425.422	386.297	549.831	338.754	437.07	458.514	228.399	299.004	246.666	232.684	240.438	263.115	269.3	197.95	286.866	254.192	10	18845019	18857073	+	protein_coding	Perp
ENSMUSG00000112640	20.4885	-0.69904	0.231745	-3.01642	0.00255779	0.0129482	10	81863933	81881081	+	protein_coding	Gm32687	ENSMUSG00000112640	45.0054	25.7202	38.9535	19.7256	4.2017	29.0137	42.7884	33.0814	41.5022	30.8513	5.91707	36.9617	1.95766	6.88413	2.42866	3.20872	3.68904	1.05293	1.62992	35.1959	10	81863933	81881081	+	protein_coding	Gm32687
ENSMUSG00000024223	7.45752	-0.699032	0.231245	-3.02291	0.0025036	0.012718	17	28530805	28539110	+	protein_coding	Armc12	ENSMUSG00000024223	3.75045	4.89908	6.49224	20.8215	11.5547	18.2372	14.9759	7.93954	2.59389	11.7022	4.73366	1.655	5.87299	8.26096	1.61911	3.20872	7.37809	6.31755	2.44488	4.69278	17	28530805	28539110	+	protein_coding	Armc12
ENSMUSG00000025804	105.099	-0.698863	0.182311	-3.83336	0.000126407	0.00112813	9	123962123	123968692	-	protein_coding	Ccr1	ENSMUSG00000025804	127.515	227.807	160.142	124.929	65.1264	99.4757	103.762	113.8	220.481	112.767	105.324	35.3067	50.8992	55.073	76.0981	109.096	54.4134	110.557	58.6771	90.7271	9	123962123	123968692	-	protein_coding	Ccr1
ENSMUSG00000036962	17.9483	-0.698226	0.200807	-3.4771	0.000506862	0.00349467	1	119923340	119997234	-	protein_coding	Cfap221	ENSMUSG00000036962	31.2538	11.0229	21.6408	23.0132	22.0589	25.6979	37.4398	23.8186	22.0481	14.8937	26.0351	11.585	11.746	12.3914	12.1433	5.13395	11.0671	20.0056	8.1496	7.8213	1	119923340	119997234	-	protein_coding	Cfap221
ENSMUSG00000086414	6.78864	-0.698172	0.223775	-3.11997	0.00180868	0.00979513	7	105762320	105863650	+	transcribed_processed_pseudogene	Gm15645	ENSMUSG00000086414	8.75106	7.34862	12.9845	12.0545	12.6051	4.14482	6.41826	7.93954	12.9694	6.38303	7.10049	2.75834	4.89416	8.26096	2.42866	6.41744	2.76678	3.15878	3.25984	3.12852	7	105762320	105863650	+	transcribed_processed_pseudogene	Gm15645
ENSMUSG00000099958	5.1278	-0.698105	0.232908	-2.99735	0.00272341	0.0135958	15	73645851	73652347	+	lncRNA	1700010B13Rik	ENSMUSG00000099958	12.5015	7.34862	0	4.38347	10.5043	9.94757	6.41826	13.2326	7.78167	4.25535	0	0	1.95766	2.75365	3.23822	3.20872	7.37809	2.10585	1.62992	3.91065	15	73645851	73652347	+	lncRNA	1700010B13Rik
ENSMUSG00000097271	40.7967	-0.697753	0.166035	-4.20244	2.64e-05	0.000315131	5	33629924	33632092	+	protein_coding	Gm9903	ENSMUSG00000097271	38.7547	22.0458	49.7739	77.8065	70.3785	48.9089	70.6008	43.6675	51.8778	45.745	34.319	29.2384	47.9627	26.1597	21.858	28.2367	21.212	31.5878	26.0787	29.721	5	33629924	33632092	+	protein_coding	Gm9903
ENSMUSG00000070997	62.3225	-0.697647	0.135391	-5.15282	2.57e-07	7.44e-06	4	45011686	45015406	+	lncRNA	1700055D18Rik	ENSMUSG00000070997	76.2592	52.6651	91.9734	93.1487	92.4374	87.0412	86.6465	64.8396	63.5503	71.2771	69.8215	31.4451	40.1321	55.073	36.43	39.7881	53.4911	50.5404	37.4882	52.4027	4	45011686	45015406	+	lncRNA	1700055D18Rik
ENSMUSG00000112891	40.102	-0.697232	0.19196	-3.63217	0.000281044	0.0021684	12	8912923	8917479	+	lncRNA	Gm47391	ENSMUSG00000112891	26.2532	29.3945	40.0355	40.5471	72.4794	65.4882	90.9253	54.2535	37.6114	61.7026	46.1532	31.9967	37.1956	28.9133	21.858	10.2679	34.1236	20.0056	30.1535	22.6818	12	8912923	8917479	+	lncRNA	Gm47391
ENSMUSG00000086952	6.39682	-0.697084	0.232997	-2.99181	0.00277327	0.0137849	4	59260050	59263269	+	lncRNA	Gm12596	ENSMUSG00000086952	7.50091	7.34862	2.16408	6.5752	6.30255	7.46068	14.9759	14.5558	9.07861	14.8937	4.73366	3.86168	3.91533	2.75365	0	0.641744	1.84452	10.5293	4.88976	3.91065	4	59260050	59263269	+	lncRNA	Gm12596
ENSMUSG00000030359	47.8894	-0.696977	0.2117	-3.29229	0.000993738	0.00605469	6	128483566	128526720	-	protein_coding	Pzp	ENSMUSG00000030359	50.006	34.2935	33.5433	74.5189	73.5298	85.3833	68.4614	38.3745	101.162	75.5325	27.2185	45.7884	34.2591	42.6816	23.4771	9.62615	59.947	30.5348	43.1929	6.25704	6	128483566	128526720	-	protein_coding	Pzp
ENSMUSG00000100075	171.647	-0.696557	0.142757	-4.87933	1.06e-06	2.35e-05	19	29046244	29048729	+	lncRNA	1700018L02Rik	ENSMUSG00000100075	138.767	124.926	215.326	230.132	304.623	216.36	247.103	193.196	242.529	255.321	74.5551	177.085	138.015	166.596	136.005	102.037	90.3816	114.769	137.728	127.487	19	29046244	29048729	+	lncRNA	1700018L02Rik
ENSMUSG00000026548	51.5802	-0.696296	0.207906	-3.34909	0.000810782	0.00514559	1	172475357	172478575	+	protein_coding	Slamf9	ENSMUSG00000026548	30.0036	55.1146	78.989	78.9024	90.3366	74.6068	79.1585	68.8094	33.7206	90.4262	40.2361	46.3401	55.7934	49.5657	14.572	20.5358	16.6007	10.5293	67.6417	29.721	1	172475357	172478575	+	protein_coding	Slamf9
ENSMUSG00000050625	35.2283	-0.696226	0.194753	-3.57492	0.000350338	0.00259343	1	181509632	181511451	-	protein_coding	Ccdc121	ENSMUSG00000050625	22.5027	53.8899	56.2661	59.1768	65.1264	29.8427	66.322	29.1117	54.4717	23.4044	26.0351	46.3401	24.4708	16.5219	17.8102	15.4018	16.6007	18.9527	32.5984	29.721	1	181509632	181511451	-	protein_coding	Ccdc121
ENSMUSG00000018819	579.198	-0.696223	0.0821985	-8.47002	2.45e-17	2.78e-14	7	142460808	142494867	+	protein_coding	Lsp1	ENSMUSG00000018819	696.334	511.954	814.776	816.421	650.213	889.479	739.169	693.387	744.446	648.941	488.75	445.748	382.723	388.265	467.923	447.937	504.477	447.493	405.85	399.669	7	142460808	142494867	+	protein_coding	Lsp1
ENSMUSG00000107397	3.22375	-0.696121	0.218802	-3.18151	0.0014651	0.00826601	6	91207215	91210044	-	TEC	4930402H05Rik	ENSMUSG00000107397	0	2.44954	2.16408	4.38347	4.2017	19.0662	4.27884	2.64651	7.78167	6.38303	2.36683	2.75834	1.95766	2.75365	0	1.28349	0	0	0	0	6	91207215	91210044	-	TEC	4930402H05Rik
ENSMUSG00000088605	4.05296	-0.695788	0.232601	-2.99133	0.00277761	0.0138011	9	35503587	35503695	-	rRNA	Gm24188	ENSMUSG00000088605	3.75045	9.79816	5.4102	8.76693	3.15128	9.94757	2.13942	0	3.89083	13.8299	2.36683	3.31001	3.91533	0	2.42866	1.28349	0.922261	2.10585	3.25984	0.78213	9	35503587	35503695	-	rRNA	Gm24188
ENSMUSG00000101791	3.62588	-0.695747	0.217906	-3.19288	0.0014086	0.00802105	1	121355115	121359900	-	lncRNA	2210011K15Rik	ENSMUSG00000101791	3.75045	2.44954	6.49224	3.2876	4.2017	12.4345	13.9062	2.64651	0	11.7022	0	2.20667	2.93649	0	2.42866	0	0	0	4.0748	0	1	121355115	121359900	-	lncRNA	2210011K15Rik
ENSMUSG00000059481	12.8882	-0.695705	0.233511	-2.97933	0.00288881	0.0142474	17	12378607	12419385	+	protein_coding	Plg	ENSMUSG00000059481	5.0006	0	24.8869	12.0545	46.2187	19.0662	29.9519	15.8791	15.5633	19.1491	4.73366	2.75834	20.5555	5.5073	1.61911	6.41744	5.53356	2.10585	10.5945	10.1677	17	12378607	12419385	+	protein_coding	Plg
ENSMUSG00000112146	25.3732	-0.695609	0.164264	-4.23471	2.29e-05	0.000279756	10	9901312	9918843	+	lncRNA	Gm46210	ENSMUSG00000112146	27.5033	29.3945	37.8714	54.7933	22.0589	30.6717	26.7427	31.7582	32.4236	30.8513	21.3015	25.9284	19.5766	17.8987	16.1911	19.8941	16.6007	18.9527	11.4094	15.6426	10	9901312	9918843	+	lncRNA	Gm46210
ENSMUSG00000028427	8.68783	-0.69492	0.226331	-3.07036	0.00213799	0.0112005	4	41033073	41048139	-	protein_coding	Aqp7	ENSMUSG00000028427	2.5003	18.3715	6.49224	7.67107	14.706	8.28964	14.9759	6.61629	20.7511	19.1491	2.36683	4.96501	7.83065	2.75365	6.47644	6.41744	3.68904	8.4234	8.96456	2.34639	4	41033073	41048139	-	protein_coding	Aqp7
ENSMUSG00000029656	16.8582	-0.694887	0.229066	-3.03357	0.0024168	0.0123901	4	104766316	104804548	+	protein_coding	C8b	ENSMUSG00000029656	12.5015	2.44954	20.5588	19.7256	28.3615	36.4744	18.1851	30.4349	45.3931	19.1491	3.55024	13.24	14.6825	9.63778	4.04777	1.92523	7.37809	20.0056	13.0394	16.4247	4	104766316	104804548	+	protein_coding	C8b
ENSMUSG00000097855	138.184	-0.694871	0.132853	-5.23036	1.69e-07	5.38e-06	19	29464749	29523159	-	lncRNA	A930007I19Rik	ENSMUSG00000097855	122.515	116.353	136.337	201.639	231.094	185.688	209.663	178.64	155.633	200.002	73.3717	115.85	161.507	103.262	85.8128	78.2927	94.9929	110.557	94.5353	107.934	19	29464749	29523159	-	lncRNA	A930007I19Rik
ENSMUSG00000087505	2.13525	-0.694864	0.211975	-3.27805	0.00104528	0.00631848	X	160488548	160499870	-	lncRNA	Gm15241	ENSMUSG00000087505	2.5003	0	1.08204	2.19173	2.10085	9.11861	10.6971	0	5.18778	4.25535	0	0.551668	0.978832	0	0	1.28349	0.922261	1.05293	0	0.78213	X	160488548	160499870	-	lncRNA	Gm15241
ENSMUSG00000097463	25.5274	-0.694819	0.208774	-3.3281	0.000874408	0.00546394	9	46326392	46329527	-	lncRNA	4930448E22Rik	ENSMUSG00000097463	25.003	12.2477	47.6098	65.752	35.7145	30.6717	59.9037	26.4651	18.1572	15.9576	26.0351	23.1701	12.7248	8.26096	23.4771	11.5514	18.4452	12.6351	19.559	17.2069	9	46326392	46329527	-	lncRNA	4930448E22Rik
ENSMUSG00000112607	5.04788	-0.694543	0.233416	-2.97555	0.00292462	0.0143847	10	70714927	70738844	-	lncRNA	Gm33979	ENSMUSG00000112607	7.50091	11.0229	6.49224	1.09587	8.4034	9.11861	4.27884	13.2326	3.89083	7.44687	0	5.51668	3.91533	6.88413	0.809555	1.28349	1.84452	4.2117	2.44488	1.56426	10	70714927	70738844	-	lncRNA	Gm33979
ENSMUSG00000021180	2233.46	-0.694443	0.108489	-6.40106	1.54e-10	1.91e-08	12	100548438	100726983	-	protein_coding	Rps6ka5	ENSMUSG00000021180	2064	2431.17	3085.98	2581.86	2876.06	3074.63	3264.75	2193.96	3346.12	2994.7	1740.8	2206.12	1701.21	2056.98	1190.86	1239.21	1786.42	1301.42	1730.16	1802.81	12	100548438	100726983	-	protein_coding	Rps6ka5
ENSMUSG00000085870	8.00103	-0.694399	0.232613	-2.98522	0.00283377	0.014037	4	114680803	114687595	+	lncRNA	Gm12829	ENSMUSG00000085870	11.2514	8.57339	28.1331	4.38347	22.0589	9.94757	4.27884	5.29303	10.3756	9.57454	7.10049	3.31001	4.89416	0	1.61911	7.05918	3.68904	3.15878	11.4094	3.91065	4	114680803	114687595	+	lncRNA	Gm12829
ENSMUSG00000048621	7.8215	-0.693951	0.233491	-2.97207	0.00295796	0.0145183	X	109196755	109200439	+	protein_coding	Gm6377	ENSMUSG00000048621	18.7523	6.12385	4.32816	17.5339	4.2017	11.6055	10.6971	7.93954	15.5633	14.8937	2.36683	3.31001	3.91533	13.7683	3.23822	1.28349	11.0671	4.2117	1.62992	0	X	109196755	109200439	+	protein_coding	Gm6377
ENSMUSG00000104720	57.2798	-0.69387	0.166561	-4.16585	3.1e-05	0.000360216	5	110206579	110207287	+	lncRNA	Gm43138	ENSMUSG00000104720	35.0042	39.1926	45.4457	72.3272	107.143	71.2909	102.692	109.83	73.9259	73.4048	28.4019	44.1334	48.9416	48.1889	35.6204	32.0872	45.1908	40.0112	50.5275	42.235	5	110206579	110207287	+	lncRNA	Gm43138
ENSMUSG00000108777	14.9954	-0.69387	0.23354	-2.9711	0.00296738	0.0145483	7	66078901	66079473	-	lncRNA	Gm45081	ENSMUSG00000108777	6.25075	8.57339	12.9845	27.3967	50.4204	33.1586	11.7668	18.5256	22.0481	26.596	8.2839	14.3434	7.83065	1.37683	0	0.641744	11.9894	11.5822	8.1496	17.989	7	66078901	66079473	-	lncRNA	Gm45081
ENSMUSG00000107336	105.775	-0.693719	0.141538	-4.90127	9.52e-07	2.14e-05	5	147427737	147428733	+	TEC	Gm43461	ENSMUSG00000107336	96.2616	91.8577	146.075	88.7652	139.707	150.043	206.454	91.3047	169.9	152.129	72.1883	88.2669	103.756	95.001	74.479	66.0996	55.3356	76.8635	79.0511	71.956	5	147427737	147428733	+	TEC	Gm43461
ENSMUSG00000049723	24.4386	-0.693562	0.230141	-3.01363	0.00258139	0.0130397	9	7344380	7369499	+	protein_coding	Mmp12	ENSMUSG00000049723	30.0036	31.844	38.9535	35.0677	27.3111	9.94757	53.4855	34.4047	10.3756	68.0856	4.73366	11.0334	27.4073	22.0292	4.85733	3.85046	7.37809	14.741	40.748	12.5141	9	7344380	7369499	+	protein_coding	Mmp12
ENSMUSG00000086742	26.2127	-0.692109	0.183607	-3.76951	0.000163567	0.00139828	7	139950395	139978977	+	lncRNA	Gm16201	ENSMUSG00000086742	20.0024	25.7202	28.1331	20.8215	57.7734	37.3034	41.7187	25.1419	38.9083	41.4897	16.5678	17.1017	23.492	23.406	14.572	23.7445	6.45583	17.8997	24.4488	19.5533	7	139950395	139978977	+	lncRNA	Gm16201
ENSMUSG00000117309	7.1	-0.691884	0.233248	-2.9663	0.00301405	0.0147323	16	10861754	10938364	-	transcribed_unitary_pseudogene	Gm49960	ENSMUSG00000117309	2.5003	8.57339	5.4102	1.09587	17.8572	14.0924	22.4639	17.2023	9.07861	6.38303	2.36683	2.20667	6.85182	0	4.04777	5.13395	10.1449	4.2117	0.81496	1.56426	16	10861754	10938364	-	transcribed_unitary_pseudogene	Gm49960
ENSMUSG00000108613	2.71885	-0.691796	0.214208	-3.22955	0.00123986	0.00724598	7	24054231	24073164	-	lncRNA	Gm36694	ENSMUSG00000108613	0	0	5.4102	6.5752	5.25213	9.94757	8.55767	5.29303	2.59389	2.12768	0	0	0	4.13048	0.809555	0	1.84452	1.05293	0	0.78213	7	24054231	24073164	-	lncRNA	Gm36694
ENSMUSG00000112274	9.89313	-0.691116	0.222844	-3.10134	0.00192645	0.0103036	12	76254561	76255334	-	lncRNA	Gm47525	ENSMUSG00000112274	12.5015	4.89908	10.8204	29.5884	12.6051	15.7503	10.6971	3.96977	10.3756	21.2768	4.73366	5.51668	2.93649	13.7683	5.66688	6.41744	8.30035	8.4234	5.70472	3.91065	12	76254561	76255334	-	lncRNA	Gm47525
ENSMUSG00000042672	554.304	-0.690758	0.122216	-5.65194	1.59e-08	7.96e-07	3	89350218	89365253	-	protein_coding	Dcst1	ENSMUSG00000042672	470.057	458.064	642.732	677.246	1009.46	785.029	884.65	640.456	549.905	827.666	388.16	395.546	504.098	351.091	492.209	510.828	362.448	328.513	407.48	400.451	3	89350218	89365253	-	protein_coding	Dcst1
ENSMUSG00000111417	13.1706	-0.690721	0.219287	-3.14985	0.00163352	0.0090219	9	78520545	78522157	+	lncRNA	Gm47430	ENSMUSG00000111417	10.0012	18.3715	9.73836	13.1504	16.8068	9.94757	18.1851	10.5861	46.69	24.4683	3.55024	9.37835	16.6401	5.5073	6.47644	7.70092	11.0671	5.26463	8.1496	11.732	9	78520545	78522157	+	lncRNA	Gm47430
ENSMUSG00000040666	136.998	-0.690602	0.159055	-4.3419	1.41e-05	0.000189963	16	96200449	96228935	+	protein_coding	Sh3bgr	ENSMUSG00000040666	100.012	101.656	161.224	220.269	203.783	193.149	218.221	165.407	178.978	193.619	86.3893	98.7485	113.544	141.813	53.4306	51.9812	106.982	96.8691	147.508	106.37	16	96200449	96228935	+	protein_coding	Sh3bgr
ENSMUSG00000095789	97.7682	-0.69036	0.131691	-5.24226	1.59e-07	5.1e-06	5	129908539	129913789	+	protein_coding	Nupr1l	ENSMUSG00000095789	107.513	78.3852	134.173	135.887	153.362	180.714	132.644	129.679	66.1442	106.384	75.7385	77.7852	68.5182	81.2327	72.0504	67.3831	65.4805	86.3399	74.1613	61.7883	5	129908539	129913789	+	protein_coding	Nupr1l
ENSMUSG00000032940	769.944	-0.689894	0.106742	-6.46321	1.03e-10	1.41e-08	16	75592843	75602829	+	protein_coding	Rbm11	ENSMUSG00000032940	1016.37	758.132	974.918	946.829	975.845	975.691	1109.29	873.35	958.442	1017.03	676.913	656.485	567.722	499.788	361.061	372.853	682.473	637.02	690.271	648.386	16	75592843	75602829	+	protein_coding	Rbm11
ENSMUSG00000028369	95.5523	-0.689069	0.192842	-3.57323	0.00035261	0.0026071	4	58042441	58206859	-	protein_coding	Svep1	ENSMUSG00000028369	98.7619	77.1605	147.158	70.1355	108.194	185.688	104.832	140.265	181.572	127.661	50.8868	92.6802	40.1321	33.0438	87.4319	136.691	24.901	84.234	57.0472	62.5704	4	58042441	58206859	-	protein_coding	Svep1
ENSMUSG00000017737	164.822	-0.68886	0.152668	-4.51216	6.42e-06	0.000100801	2	164940779	164955850	+	protein_coding	Mmp9	ENSMUSG00000017737	130.016	105.33	173.126	225.749	252.102	308.375	188.269	164.084	325.533	211.704	85.2058	127.435	156.613	148.697	86.6224	118.723	130.039	102.134	139.358	117.32	2	164940779	164955850	+	protein_coding	Mmp9
ENSMUSG00000086017	51.1759	-0.688742	0.223896	-3.07617	0.00209677	0.0110368	4	20343705	20347818	+	lncRNA	Gm11872	ENSMUSG00000086017	47.5057	40.4174	53.02	111.778	79.8323	60.5144	65.2523	52.9303	73.9259	108.511	14.201	49.0984	46.9839	41.3048	1.61911	7.05918	58.1024	36.8524	46.4527	28.1567	4	20343705	20347818	+	lncRNA	Gm11872
ENSMUSG00000096094	18.6724	-0.688382	0.212691	-3.23654	0.00120988	0.00710692	1	75220094	75232102	-	protein_coding	A630095N17Rik	ENSMUSG00000096094	10.0012	4.89908	18.3947	29.5884	42.017	34.8165	26.7427	31.7582	19.4542	27.6598	10.6507	7.17168	11.746	24.7829	8.9051	7.05918	14.7562	12.6351	17.1142	13.2962	1	75220094	75232102	-	protein_coding	A630095N17Rik
ENSMUSG00000020191	29.8537	-0.68824	0.209205	-3.28978	0.00100264	0.00609804	11	11462093	11515192	+	protein_coding	Spata48	ENSMUSG00000020191	41.255	20.8211	33.5433	39.4512	53.5717	44.7641	49.2066	37.0512	35.0175	39.362	27.2185	28.6867	14.6825	8.26096	14.572	5.13395	26.7456	24.2173	8.1496	45.3636	11	11462093	11515192	+	protein_coding	Spata48
ENSMUSG00000114709	39.9029	-0.68779	0.188742	-3.64407	0.000268357	0.00208899	14	25459979	25462387	+	lncRNA	Gm47920	ENSMUSG00000114709	25.003	26.9449	45.4457	69.0396	95.5887	55.5406	43.8581	59.5466	42.7992	51.0642	26.0351	40.8234	20.5555	38.5511	21.0484	21.1775	39.6572	20.0056	15.4842	39.8886	14	25459979	25462387	+	lncRNA	Gm47920
ENSMUSG00000083014	4.17237	-0.687745	0.227191	-3.02716	0.0024686	0.0125642	2	145892081	145892704	+	processed_pseudogene	Gm11764	ENSMUSG00000083014	5.0006	2.44954	0	4.38347	6.30255	9.94757	4.27884	17.2023	12.9694	3.19151	2.36683	1.10334	5.87299	0	0	2.56697	0	1.05293	1.62992	3.12852	2	145892081	145892704	+	processed_pseudogene	Gm11764
ENSMUSG00000024998	1271.14	-0.687698	0.11435	-6.01395	1.81e-09	1.36e-07	19	38481108	38785030	+	protein_coding	Plce1	ENSMUSG00000024998	978.868	1178.23	1812.42	1320.52	2139.72	1884.24	1946.87	1299.44	1613.4	1705.33	912.413	1180.57	1007.22	1050.52	811.983	905.5	803.289	793.906	1095.31	983.138	19	38481108	38785030	+	protein_coding	Plce1
ENSMUSG00000116924	6.46844	-0.687323	0.213592	-3.21793	0.00129122	0.007489	17	15631762	15641104	+	lncRNA	4933401D09Rik	ENSMUSG00000116924	0	4.89908	1.08204	4.38347	29.4119	21.5531	14.9759	7.93954	9.07861	17.0214	0	4.96501	7.83065	2.75365	0	0	1.84452	0	1.62992	0	17	15631762	15641104	+	lncRNA	4933401D09Rik
ENSMUSG00000038526	897.07	-0.687052	0.123766	-5.55121	2.84e-08	1.3e-06	3	95897767	95904691	-	protein_coding	Car14	ENSMUSG00000038526	817.599	963.893	1391.5	1170.39	1415.97	776.739	1417.36	911.724	1103.7	1260.65	670.996	695.653	876.054	827.472	460.637	458.847	651.116	579.109	710.645	781.348	3	95897767	95904691	-	protein_coding	Car14
ENSMUSG00000067049	4.24221	-0.686887	0.230525	-2.97966	0.00288567	0.0142342	17	13108616	13131810	-	protein_coding	Unc93a	ENSMUSG00000067049	2.5003	4.89908	2.16408	18.6297	11.5547	9.94757	7.48797	1.32326	3.89083	2.12768	2.36683	0.551668	0	2.75365	1.61911	5.13395	1.84452	2.10585	0.81496	3.12852	17	13108616	13131810	-	protein_coding	Unc93a
ENSMUSG00000054582	93.3295	-0.686587	0.195812	-3.50635	0.0004543	0.00319041	2	164025449	164050538	+	protein_coding	Pabpc1l	ENSMUSG00000054582	70.0085	46.5412	72.4967	192.873	118.698	187.346	131.574	128.356	102.459	159.576	33.1356	72.2685	99.8408	95.001	37.2395	35.2959	63.636	111.61	56.2322	52.4027	2	164025449	164050538	+	protein_coding	Pabpc1l
ENSMUSG00000105572	227.616	-0.686452	0.136749	-5.0198	5.17e-07	1.31e-05	3	119727747	119729790	-	TEC	Gm43300	ENSMUSG00000105572	186.272	165.344	262.936	239.995	399.162	401.219	281.334	267.298	411.132	246.81	162.128	175.982	121.375	154.205	204.008	187.389	138.339	177.944	181.736	187.711	3	119727747	119729790	-	TEC	Gm43300
ENSMUSG00000113290	170.726	-0.686429	0.177502	-3.86716	0.000110109	0.00101124	13	15817315	15820679	+	TEC	A530058O07Rik	ENSMUSG00000113290	93.7613	110.229	154.732	283.83	252.102	335.73	190.408	244.803	306.079	213.831	94.6732	177.085	157.592	170.726	75.2886	89.2024	145.717	85.2869	145.063	88.3807	13	15817315	15820679	+	TEC	A530058O07Rik
ENSMUSG00000110456	8.87694	-0.68639	0.22863	-3.00219	0.00268046	0.0134456	8	123767550	123768495	+	TEC	Gm45865	ENSMUSG00000110456	6.25075	8.57339	5.4102	13.1504	21.0085	14.0924	18.1851	11.9093	10.3756	12.7661	4.73366	9.93002	9.78832	11.0146	2.42866	1.92523	5.53356	0	7.33464	3.12852	8	123767550	123768495	+	TEC	Gm45865
ENSMUSG00000112196	3.43899	-0.686357	0.219869	-3.12167	0.00179831	0.009751	10	81875057	81875520	+	processed_pseudogene	Gm8274	ENSMUSG00000112196	7.50091	4.89908	5.4102	7.67107	0	4.97378	5.34855	7.93954	9.07861	4.25535	2.36683	1.655	0	0	0	0.641744	0	0	0	7.03917	10	81875057	81875520	+	processed_pseudogene	Gm8274
ENSMUSG00000045463	7.23336	-0.686329	0.233488	-2.93946	0.00328784	0.0158133	1	96906175	96997577	-	transcribed_unprocessed_pseudogene	Slco6b1	ENSMUSG00000045463	2.5003	7.34862	3.24612	15.3421	8.4034	24.04	20.3245	10.5861	2.59389	10.6384	0	5.51668	0.978832	4.13048	4.85733	3.20872	4.6113	11.5822	1.62992	3.12852	1	96906175	96997577	-	transcribed_unprocessed_pseudogene	Slco6b1
ENSMUSG00000114886	3.98584	-0.685815	0.224939	-3.04889	0.00229685	0.0118844	13	58218718	58219276	+	processed_pseudogene	Gm48432	ENSMUSG00000114886	3.75045	7.34862	1.08204	4.38347	7.35298	9.94757	5.34855	0	5.18778	19.1491	0	3.31001	0	2.75365	3.23822	0	0	2.10585	1.62992	3.12852	13	58218718	58219276	+	processed_pseudogene	Gm48432
ENSMUSG00000117313	19.3007	-0.68571	0.230767	-2.97143	0.00296413	0.0145393	17	28424722	28426430	-	lncRNA	Gm49838	ENSMUSG00000117313	5.0006	19.5963	3.24612	25.2049	31.5128	32.3296	42.7884	41.021	47.987	20.2129	8.2839	12.1367	12.7248	15.1451	8.09555	7.70092	12.9117	3.15878	4.88976	32.0673	17	28424722	28426430	-	lncRNA	Gm49838
ENSMUSG00000115715	3.80733	-0.685309	0.227044	-3.01839	0.0025412	0.0128834	15	36341216	36367117	-	lncRNA	Gm33936	ENSMUSG00000115715	2.5003	4.89908	2.16408	7.67107	8.4034	3.31586	11.7668	0	16.8603	2.12768	0	2.20667	1.95766	4.13048	0.809555	0.641744	0	1.05293	4.0748	1.56426	15	36341216	36367117	-	lncRNA	Gm33936
ENSMUSG00000033685	4103.7	-0.685174	0.124278	-5.51325	3.52e-08	1.52e-06	7	100493336	100502020	+	protein_coding	Ucp2	ENSMUSG00000033685	3025.37	4343.03	3971.09	5116.6	6152.34	5444.64	5476.91	3971.09	8836.09	5027.7	2646.11	3067.27	3879.11	3169.45	3326.46	3122.72	2806.44	2533.34	3117.22	3040.92	7	100493336	100502020	+	protein_coding	Ucp2
ENSMUSG00000071340	13.5623	-0.685022	0.220132	-3.11187	0.00185907	0.0100149	10	34037596	34109815	+	protein_coding	Trappc3l	ENSMUSG00000071340	2.5003	14.6972	19.4767	15.3421	37.8153	11.6055	22.4639	9.2628	32.4236	15.9576	9.46732	11.585	6.85182	13.7683	5.66688	7.70092	6.45583	11.5822	4.88976	11.732	10	34037596	34109815	+	protein_coding	Trappc3l
ENSMUSG00000034614	3735.76	-0.684986	0.0957274	-7.15559	8.33e-13	2.5e-10	11	3330400	3342971	+	protein_coding	Pik3ip1	ENSMUSG00000034614	3754.2	3844.55	4393.08	4785.65	4470.61	5010.26	4806.2	4350.87	6615.72	4412.8	2718.3	2865.91	3356.41	3280.98	2182.56	2074.76	3151.37	2698.65	2964.01	2978.35	11	3330400	3342971	+	protein_coding	Pik3ip1
ENSMUSG00000092183	34.7251	-0.684809	0.166177	-4.12098	3.77e-05	0.000420293	5	114773736	114774983	-	lncRNA	4930515G01Rik	ENSMUSG00000092183	28.7535	29.3945	32.4612	51.5057	60.9247	53.8827	53.4855	42.3442	25.9389	62.7664	27.2185	22.6184	27.4073	19.2756	25.9058	27.595	27.6678	13.688	35.8582	25.8103	5	114773736	114774983	-	lncRNA	4930515G01Rik
ENSMUSG00000085091	16.4466	-0.684484	0.225485	-3.03561	0.00240053	0.0123273	11	16815430	16830702	-	lncRNA	Egfros	ENSMUSG00000085091	30.0036	14.6972	25.969	15.3421	21.0085	9.94757	27.8124	13.2326	24.642	40.4258	4.73366	6.62001	1.95766	20.6524	6.47644	3.85046	19.3675	8.4234	22.8189	10.9498	11	16815430	16830702	-	lncRNA	Egfros
ENSMUSG00000092492	277.078	-0.684469	0.13158	-5.20193	1.97e-07	6.08e-06	4	78211954	78214177	+	lncRNA	B230208B08Rik	ENSMUSG00000092492	218.776	193.514	286.741	423.005	454.834	420.285	395.792	354.633	287.922	436.174	192.897	243.837	213.385	250.582	181.34	157.869	173.385	250.596	195.59	210.393	4	78211954	78214177	+	lncRNA	B230208B08Rik
ENSMUSG00000039798	158.463	-0.684289	0.150936	-4.53363	5.8e-06	9.26e-05	2	29868722	29870317	-	lncRNA	2600006K01Rik	ENSMUSG00000039798	141.267	117.578	183.947	267.392	223.741	194.807	226.778	248.772	181.572	213.831	91.1229	158.88	169.338	158.335	76.0981	67.3831	104.215	98.975	107.575	137.655	2	29868722	29870317	-	lncRNA	2600006K01Rik
ENSMUSG00000097370	28.1291	-0.684166	0.216091	-3.1661	0.00154497	0.00864288	10	57478380	57486351	-	lncRNA	4930467K11Rik	ENSMUSG00000097370	32.5039	15.922	35.7073	44.9305	21.0085	35.6455	52.4158	41.021	47.987	46.8089	13.0176	28.1351	26.4285	30.2902	4.85733	3.20872	15.6784	17.8997	15.4842	33.6316	10	57478380	57486351	-	lncRNA	4930467K11Rik
ENSMUSG00000106198	21.842	-0.684023	0.191563	-3.57074	0.000355968	0.00262939	5	143393688	143397457	-	lncRNA	Gm42504	ENSMUSG00000106198	16.252	12.2477	32.4612	25.2049	29.4119	37.3034	42.7884	33.0814	19.4542	35.1067	14.201	20.4117	19.5766	12.3914	17.8102	19.2523	8.30035	6.31755	21.189	14.0783	5	143393688	143397457	-	lncRNA	Gm42504
ENSMUSG00000064722	57.1462	-0.683604	0.18338	-3.7278	0.000193159	0.0016034	2	119740827	119740956	-	snoRNA	Gm25857	ENSMUSG00000064722	70.0085	51.4403	19.4767	124.929	84.034	107.765	54.5552	66.1629	81.7075	73.4048	44.9697	35.8584	59.7087	37.1743	43.716	42.3551	23.0565	40.0112	30.9685	51.6206	2	119740827	119740956	-	snoRNA	Gm25857
ENSMUSG00000093749	7.28143	-0.682949	0.232924	-2.93207	0.00336715	0.0161139	9	107991683	107995656	-	lncRNA	4921523L03Rik	ENSMUSG00000093749	1.25015	2.44954	4.32816	10.9587	21.0085	15.7503	16.0456	2.64651	3.89083	28.7236	2.36683	6.06835	6.85182	5.5073	0.809555	2.56697	6.45583	3.15878	2.44488	2.34639	9	107991683	107995656	-	lncRNA	4921523L03Rik
ENSMUSG00000115124	174.537	-0.682895	0.106048	-6.43952	1.2e-10	1.57e-08	14	34230618	34231728	-	lncRNA	Gm49201	ENSMUSG00000115124	196.274	145.748	234.803	239.995	195.379	208.899	263.148	182.609	258.092	247.874	113.608	163.294	148.782	152.828	120.624	103.321	126.35	120.033	117.354	151.733	14	34230618	34231728	-	lncRNA	Gm49201
ENSMUSG00000079033	48.0681	-0.682823	0.15551	-4.39087	1.13e-05	0.00015828	8	70139710	70167488	+	protein_coding	Mef2b	ENSMUSG00000079033	61.2574	55.1146	38.9535	67.9437	67.2272	82.8964	65.2523	59.5466	31.1267	79.7879	33.1356	46.3401	29.3649	24.7829	27.5249	32.7289	27.6678	35.7995	45.6377	49.2742	8	70139710	70167488	+	protein_coding	Mef2b
ENSMUSG00000030827	5.07272	-0.682486	0.22117	-3.0858	0.00203009	0.0107491	7	45613885	45615490	-	protein_coding	Fgf21	ENSMUSG00000030827	0	0	2.16408	9.8628	27.3111	13.2634	1.06971	14.5558	7.78167	6.38303	0	1.655	3.91533	2.75365	1.61911	0	2.76678	3.15878	1.62992	1.56426	7	45613885	45615490	-	protein_coding	Fgf21
ENSMUSG00000103119	13.0645	-0.682478	0.219084	-3.11514	0.00183859	0.00992205	4	136639581	136642068	+	TEC	Gm37583	ENSMUSG00000103119	7.50091	14.6972	32.4612	8.76693	16.8068	14.9214	23.5336	7.93954	20.7511	27.6598	7.10049	10.4817	5.87299	5.5073	9.71466	3.85046	7.37809	10.5293	19.559	6.25704	4	136639581	136642068	+	TEC	Gm37583
ENSMUSG00000039552	254.322	-0.682225	0.108521	-6.28659	3.25e-10	3.5e-08	10	33905110	33916021	+	protein_coding	Rsph4a	ENSMUSG00000039552	233.778	341.711	285.659	257.529	408.616	305.888	384.026	293.763	300.891	354.258	169.228	222.322	247.644	192.756	147.339	138.617	202.897	219.008	203.74	176.761	10	33905110	33916021	+	protein_coding	Rsph4a
ENSMUSG00000020437	60.8246	-0.681882	0.148369	-4.59584	4.31e-06	7.29e-05	11	6506547	6520965	-	protein_coding	Myo1g	ENSMUSG00000020437	76.2592	96.7568	60.5943	51.5057	69.3281	101.134	82.3676	51.607	110.24	67.0218	39.0527	40.8234	49.9204	42.6816	58.2879	42.9968	34.1236	45.2758	66.0117	30.5031	11	6506547	6520965	-	protein_coding	Myo1g
ENSMUSG00000046714	122.837	-0.681104	0.155486	-4.38048	1.18e-05	0.000164437	8	121116170	121118895	+	protein_coding	Foxc2	ENSMUSG00000046714	162.52	162.894	257.526	85.4776	154.413	122.687	192.548	153.498	137.476	125.533	80.4722	76.1302	82.2218	57.8267	136.815	107.813	54.4134	112.663	112.464	81.3416	8	121116170	121118895	+	protein_coding	Foxc2
ENSMUSG00000056498	36.3465	-0.681087	0.215579	-3.15934	0.00158126	0.00878963	3	84666191	84704575	+	protein_coding	Tmem154	ENSMUSG00000056498	27.5033	30.6192	28.1331	26.3008	58.8238	43.1061	53.4855	42.3442	134.882	38.2982	40.2361	19.86	26.4285	8.26096	25.9058	38.5046	23.9788	33.6936	18.7441	7.8213	3	84666191	84704575	+	protein_coding	Tmem154
ENSMUSG00000041660	39.6182	-0.681059	0.166481	-4.09092	4.3e-05	0.000465967	2	110262696	110314560	-	protein_coding	Bbox1	ENSMUSG00000041660	32.5039	41.6422	51.9379	32.876	75.6306	36.4744	58.834	55.5768	53.1747	63.8303	34.319	43.0301	24.4708	44.0584	19.4293	19.8941	25.8233	22.1114	30.1535	26.5924	2	110262696	110314560	-	protein_coding	Bbox1
ENSMUSG00000112098	2.23096	-0.681048	0.201902	-3.37315	0.000743123	0.00478355	10	86640682	86642531	+	processed_pseudogene	Gm18876	ENSMUSG00000112098	0	0	2.16408	5.47933	4.2017	4.97378	6.41826	0	9.07861	8.5107	0	0.551668	1.95766	0	0	1.28349	0	0	0	0	10	86640682	86642531	+	processed_pseudogene	Gm18876
ENSMUSG00000105941	6.9084	-0.680842	0.232867	-2.92374	0.00345849	0.0164635	3	89912915	89914053	+	lncRNA	Gm42809	ENSMUSG00000105941	5.0006	2.44954	4.32816	15.3421	15.7564	12.4345	11.7668	6.61629	12.9694	11.7022	0	2.75834	4.89416	0	3.23822	2.56697	8.30035	2.10585	7.33464	8.60343	3	89912915	89914053	+	lncRNA	Gm42809
ENSMUSG00000093994	24.217	-0.680768	0.199998	-3.40388	0.000664357	0.00436453	7	59386080	59386159	-	snoRNA	Gm26498	ENSMUSG00000093994	27.5033	6.12385	25.969	27.3967	43.0674	43.1061	32.0913	43.6675	31.1267	35.1067	8.2839	25.3767	18.5978	23.406	9.71466	11.5514	10.1449	18.9527	22.8189	20.3354	7	59386080	59386159	-	snoRNA	Gm26498
ENSMUSG00000042417	104.478	-0.680412	0.171969	-3.9566	7.6e-05	0.000744055	13	112987801	112990777	+	protein_coding	Ccno	ENSMUSG00000042417	82.51	71.0366	129.845	90.9569	168.068	212.215	160.456	100.568	199.73	114.895	108.874	67.3035	99.8408	41.3048	72.8599	52.623	66.4028	64.2284	109.205	76.6488	13	112987801	112990777	+	protein_coding	Ccno
ENSMUSG00000005892	188.513	-0.680179	0.221871	-3.06565	0.00217197	0.0113591	6	92242060	92244650	-	protein_coding	Trh	ENSMUSG00000005892	162.52	113.904	475.016	188.489	341.388	175.74	174.363	133.649	606.97	164.895	124.259	209.634	51.8781	70.2181	94.7179	59.6822	115.283	138.986	181.736	186.929	6	92242060	92244650	-	protein_coding	Trh
ENSMUSG00000117381	41.4723	-0.680003	0.233484	-2.91242	0.00358642	0.0169791	18	7043908	7044135	-	processed_pseudogene	Gm10350	ENSMUSG00000117381	57.5069	61.2385	17.3126	42.7388	98.74	45.593	35.3004	34.4047	98.5678	103.192	40.2361	47.9951	41.1109	22.0292	3.23822	5.13395	23.9788	36.8524	4.88976	9.38556	18	7043908	7044135	-	processed_pseudogene	Gm10350
ENSMUSG00000048856	200.465	-0.67959	0.159015	-4.27375	1.92e-05	0.000242273	12	108836045	108856815	+	protein_coding	Slc25a47	ENSMUSG00000048856	241.279	215.559	350.581	179.722	222.69	315.835	343.377	164.084	290.516	214.895	112.424	103.162	143.888	97.7546	203.198	161.719	103.293	98.975	226.559	219.779	12	108836045	108856815	+	protein_coding	Slc25a47
ENSMUSG00000081249	37.9519	-0.67898	0.170061	-3.99257	6.54e-05	0.000658267	11	96795438	96795825	-	processed_pseudogene	Gm11517	ENSMUSG00000081249	33.7541	23.2706	29.2151	48.2181	56.723	63.0013	43.8581	48.9605	83.0045	54.2557	21.3015	34.7551	35.2379	22.0292	31.5726	31.4454	19.3675	27.3761	21.189	30.5031	11	96795438	96795825	-	processed_pseudogene	Gm11517
ENSMUSG00000114231	11.0372	-0.678698	0.222675	-3.04793	0.00230425	0.0119167	13	58775457	58797448	-	lncRNA	Gm40968	ENSMUSG00000114231	6.25075	9.79816	10.8204	21.9173	12.6051	14.9214	16.0456	25.1419	11.6725	19.1491	9.46732	7.17168	18.5978	5.5073	1.61911	5.13395	2.76678	6.31755	4.88976	10.9498	13	58775457	58797448	-	lncRNA	Gm40968
ENSMUSG00000117055	16.5441	-0.678082	0.212115	-3.19676	0.00138981	0.00793777	17	22687719	22690460	+	processed_pseudogene	Gm9805	ENSMUSG00000117055	18.7523	24.4954	19.4767	10.9587	23.1094	12.4345	43.8581	19.8489	18.1572	26.596	10.6507	9.93002	10.7671	13.7683	4.85733	3.85046	11.0671	13.688	24.4488	10.1677	17	22687719	22690460	+	processed_pseudogene	Gm9805
ENSMUSG00000101856	251.035	-0.677519	0.12556	-5.39596	6.82e-08	2.53e-06	5	25530012	25531466	+	lncRNA	1700096K18Rik	ENSMUSG00000101856	176.271	197.188	336.515	335.335	369.75	378.008	410.768	297.733	258.092	375.535	176.329	223.425	218.279	190.002	199.15	148.243	194.597	145.304	191.516	198.661	5	25530012	25531466	+	lncRNA	1700096K18Rik
ENSMUSG00000074206	7.84857	-0.677398	0.230604	-2.9375	0.00330875	0.0158815	3	138341774	138358861	+	protein_coding	Adh6b	ENSMUSG00000074206	5.0006	1.22477	3.24612	7.67107	13.6555	30.6717	23.5336	10.5861	10.3756	12.7661	0	6.06835	13.7036	5.5073	1.61911	1.28349	0	2.10585	3.25984	4.69278	3	138341774	138358861	+	protein_coding	Adh6b
ENSMUSG00000097673	10.0134	-0.677312	0.224246	-3.02039	0.00252446	0.0128091	5	28019464	28071105	-	lncRNA	Gm26608	ENSMUSG00000097673	7.50091	8.57339	15.1486	19.7256	5.25213	17.4082	12.8365	21.1721	9.07861	18.0852	7.10049	6.62001	2.93649	8.26096	1.61911	7.70092	6.45583	12.6351	10.5945	1.56426	5	28019464	28071105	-	lncRNA	Gm26608
ENSMUSG00000087268	26.8016	-0.677068	0.164384	-4.11881	3.81e-05	0.000423182	2	30658467	30678011	-	lncRNA	Gm14486	ENSMUSG00000087268	26.2532	24.4954	38.9535	38.3553	46.2187	26.5269	39.5792	39.6977	25.9389	35.1067	8.2839	21.515	30.3438	12.3914	17.0006	20.5358	19.3675	26.3231	20.374	18.7711	2	30658467	30678011	-	lncRNA	Gm14486
ENSMUSG00000114545	8.67826	-0.67662	0.221807	-3.05049	0.00228469	0.0118295	13	41543004	41559913	-	lncRNA	Gm32184	ENSMUSG00000114545	6.25075	3.67431	5.4102	17.5339	12.6051	18.2372	18.1851	10.5861	11.6725	11.7022	8.2839	7.17168	7.83065	5.5073	4.85733	5.13395	5.53356	6.31755	0.81496	6.25704	13	41543004	41559913	-	lncRNA	Gm32184
ENSMUSG00000036103	665.957	-0.676576	0.119737	-5.65054	1.6e-08	8e-07	18	9707594	9882644	+	protein_coding	Colec12	ENSMUSG00000036103	758.842	660.151	863.468	843.817	739.5	891.136	783.027	971.271	957.145	841.496	474.549	446.851	361.189	331.815	562.641	711.052	326.48	604.379	541.948	648.386	18	9707594	9882644	+	protein_coding	Colec12
ENSMUSG00000051367	15.676	-0.676477	0.191699	-3.52886	0.000417355	0.0029829	12	73040014	73053887	-	protein_coding	Six1	ENSMUSG00000051367	20.0024	31.844	20.5588	10.9587	31.5128	19.8951	16.0456	18.5256	12.9694	19.1491	10.6507	8.82669	17.619	13.7683	12.1433	13.4766	7.37809	10.5293	11.4094	6.25704	12	73040014	73053887	-	protein_coding	Six1
ENSMUSG00000085794	17.5016	-0.676195	0.216496	-3.12336	0.00178798	0.00970703	6	83692805	83712201	-	lncRNA	Vax2os	ENSMUSG00000085794	8.75106	7.34862	16.2306	16.438	13.6555	48.9089	31.0216	33.0814	25.9389	30.8513	9.46732	7.72335	21.5343	5.5073	16.1911	11.5514	11.9894	11.5822	8.96456	13.2962	6	83692805	83712201	-	lncRNA	Vax2os
ENSMUSG00000043727	5.86206	-0.676125	0.230214	-2.93694	0.00331464	0.0159048	2	129458358	129536602	-	protein_coding	F830045P16Rik	ENSMUSG00000043727	6.25075	4.89908	3.24612	0	2.10085	9.94757	19.2548	6.61629	12.9694	24.4683	3.55024	7.72335	1.95766	0	0.809555	2.56697	1.84452	4.2117	3.25984	1.56426	2	129458358	129536602	-	protein_coding	F830045P16Rik
ENSMUSG00000083738	8.43714	-0.676052	0.232701	-2.90524	0.00366974	0.0172919	X	53623278	53623838	+	processed_pseudogene	Gm14592	ENSMUSG00000083738	10.0012	12.2477	7.57428	5.47933	16.8068	9.94757	10.6971	5.29303	38.9083	7.44687	2.36683	5.51668	8.80948	11.0146	1.61911	0	0	2.10585	9.77952	3.12852	X	53623278	53623838	+	processed_pseudogene	Gm14592
ENSMUSG00000035296	16.5914	-0.675835	0.207258	-3.26084	0.00111083	0.00665174	14	61219114	61258490	-	protein_coding	Sgcg	ENSMUSG00000035296	20.0024	9.79816	43.2816	16.438	17.8572	29.0137	33.161	18.5256	20.7511	8.5107	13.0176	10.4817	9.78832	4.13048	8.9051	8.98441	11.9894	16.8468	15.4842	14.8605	14	61219114	61258490	-	protein_coding	Sgcg
ENSMUSG00000026940	274.81	-0.67573	0.138884	-4.86542	1.14e-06	2.49e-05	2	25608634	25617678	-	protein_coding	Ccdc183	ENSMUSG00000026940	216.276	203.312	307.3	442.73	443.28	465.049	387.235	317.582	243.826	415.961	210.648	227.839	258.412	216.162	157.863	137.333	236.099	208.479	222.484	178.326	2	25608634	25617678	-	protein_coding	Ccdc183
ENSMUSG00000079466	35.4878	-0.675714	0.230164	-2.9358	0.00332693	0.0159463	2	31640036	31655795	+	protein_coding	Prdm12	ENSMUSG00000079466	25.003	24.4954	93.0555	61.3685	44.1179	76.2647	89.8556	21.1721	20.7511	35.1067	9.46732	59.5801	3.91533	22.0292	11.3338	12.8349	25.8233	8.4234	44.8228	20.3354	2	31640036	31655795	+	protein_coding	Prdm12
ENSMUSG00000053388	2.88393	-0.675623	0.2238	-3.01887	0.00253718	0.0128694	5	135353294	135368005	+	protein_coding	Trim50	ENSMUSG00000053388	2.5003	0	4.32816	8.76693	3.15128	6.63171	4.27884	6.61629	7.78167	2.12768	0	3.31001	1.95766	2.75365	0	0	1.84452	0	1.62992	0	5	135353294	135368005	+	protein_coding	Trim50
ENSMUSG00000113019	10.0087	-0.67487	0.220864	-3.05558	0.00224623	0.0116698	13	74509597	74522461	-	lncRNA	Gm47467	ENSMUSG00000113019	13.7517	24.4954	9.73836	16.438	16.8068	7.46068	9.62738	2.64651	7.78167	24.4683	9.46732	4.96501	9.78832	6.88413	3.23822	6.41744	7.37809	8.4234	5.70472	4.69278	13	74509597	74522461	-	lncRNA	Gm47467
ENSMUSG00000086556	5.52184	-0.674718	0.230371	-2.92883	0.00340236	0.016257	3	96209626	96220168	-	lncRNA	Gm15444	ENSMUSG00000086556	6.25075	4.89908	10.8204	8.76693	8.4034	9.11861	12.8365	2.64651	6.48472	5.31919	2.36683	1.655	3.91533	4.13048	3.23822	3.20872	0	8.4234	3.25984	4.69278	3	96209626	96220168	-	lncRNA	Gm15444
ENSMUSG00000028718	53.9818	-0.674718	0.184068	-3.66559	0.000246771	0.0019532	4	115000158	115043196	+	protein_coding	Stil	ENSMUSG00000028718	60.0072	72.2614	60.5943	48.2181	81.9332	74.6068	118.738	83.3652	31.1267	59.5749	73.3717	43.5818	52.8569	27.5365	21.858	21.8193	31.3569	35.7995	50.5275	30.5031	4	115000158	115043196	+	protein_coding	Stil
ENSMUSG00000074071	50.5048	-0.674669	0.166357	-4.05556	5e-05	0.00053038	7	68273838	68363092	+	protein_coding	Fam169b	ENSMUSG00000074071	41.255	48.9908	57.3481	69.0396	81.9332	82.0675	47.0672	67.4861	77.8167	67.0218	46.1532	57.3735	23.492	45.4353	29.9535	20.5358	35.9682	25.2702	54.6023	31.2852	7	68273838	68363092	+	protein_coding	Fam169b
ENSMUSG00000104271	52.0514	-0.674619	0.17223	-3.91696	8.97e-05	0.000855328	2	14966197	14967523	+	TEC	Gm37891	ENSMUSG00000104271	45.0054	25.7202	46.5277	50.4099	80.8828	97.8178	83.4373	64.8396	99.8648	67.0218	27.2185	42.4784	36.2168	56.4499	31.5726	41.7133	35.9682	24.2173	38.3031	45.3636	2	14966197	14967523	+	TEC	Gm37891
ENSMUSG00000111953	5.54705	-0.674572	0.20905	-3.22684	0.00125165	0.00729961	10	22052250	22054150	+	processed_pseudogene	Gm18637	ENSMUSG00000111953	7.50091	0	2.16408	18.6297	15.7564	9.11861	4.27884	15.8791	12.9694	10.6384	2.36683	7.72335	3.91533	0	0	0	0	0	0	0	10	22052250	22054150	+	processed_pseudogene	Gm18637
ENSMUSG00000085419	39.4749	-0.674568	0.178146	-3.78661	0.000152718	0.00132101	11	117523602	117532205	+	lncRNA	Gm11734	ENSMUSG00000085419	37.5045	34.2935	43.2816	37.2595	88.2357	69.633	55.6249	30.4349	66.1442	41.4897	15.3844	44.6851	28.3861	39.928	23.4771	32.0872	31.3569	26.3231	23.6338	20.3354	11	117523602	117532205	+	lncRNA	Gm11734
ENSMUSG00000086340	17.948	-0.67453	0.18711	-3.60499	0.000312167	0.0023668	2	18054192	18056613	-	lncRNA	1810059C17Rik	ENSMUSG00000086340	25.003	15.922	22.7229	19.7256	32.5632	20.7241	20.3245	31.7582	20.7511	22.3406	8.2839	22.0667	9.78832	15.1451	14.572	11.5514	4.6113	17.8997	13.0394	10.1677	2	18054192	18056613	-	lncRNA	1810059C17Rik
ENSMUSG00000047216	864.954	-0.674239	0.0995899	-6.77016	1.29e-11	2.45e-09	1	110888325	110977584	-	protein_coding	Cdh19	ENSMUSG00000047216	940.113	1225.99	1038.76	984.088	902.315	942.532	1234.44	1001.71	1195.78	1267.03	528.986	690.136	539.336	648.485	501.114	557.675	765.476	691.772	720.424	922.914	1	110888325	110977584	-	protein_coding	Cdh19
ENSMUSG00000097476	29.9997	-0.673831	0.206372	-3.26513	0.00109416	0.00657116	12	112946362	112950512	-	lncRNA	Gm26583	ENSMUSG00000097476	20.0024	14.6972	23.8049	27.3967	53.5717	81.2385	59.9037	30.4349	31.1267	48.9366	14.201	24.2734	33.2803	24.7829	12.1433	16.0436	31.3569	13.688	19.559	19.5533	12	112946362	112950512	-	lncRNA	Gm26583
ENSMUSG00000113012	2.61397	-0.673761	0.202924	-3.32027	0.000899317	0.00558827	12	99639715	99641924	-	TEC	Gm47196	ENSMUSG00000113012	0	0	2.16408	4.38347	13.6555	6.63171	2.13942	11.9093	3.89083	2.12768	2.36683	0	1.95766	0	0	0	0	1.05293	0	0	12	99639715	99641924	-	TEC	Gm47196
ENSMUSG00000107355	102.095	-0.673567	0.135746	-4.96198	6.98e-07	1.67e-05	5	31569594	31571397	-	lncRNA	AI839979	ENSMUSG00000107355	87.5106	66.1375	114.696	132.6	180.673	187.346	134.783	132.326	123.21	115.958	68.638	65.0968	80.2642	83.9864	85.8128	75.084	86.6925	81.0752	58.6771	81.3416	5	31569594	31571397	-	lncRNA	AI839979
ENSMUSG00000034579	909.386	-0.673022	0.135678	-4.96043	7.03e-07	1.67e-05	11	3488283	3499350	+	protein_coding	Pla2g3	ENSMUSG00000034579	662.58	743.435	770.413	1555.03	1311.98	1397.63	1345.69	1087.72	1152.98	1356.39	392.894	846.81	669.521	682.906	645.215	707.843	701.84	637.02	663.377	856.433	11	3488283	3499350	+	protein_coding	Pla2g3
ENSMUSG00000027744	20.8845	-0.672285	0.216916	-3.09928	0.00193991	0.0103612	3	53488652	53508502	+	protein_coding	Stoml3	ENSMUSG00000027744	10.0012	9.79816	85.4812	19.7256	33.6136	20.7241	29.9519	21.1721	23.345	23.4044	7.10049	14.3434	13.7036	15.1451	13.7624	11.5514	19.3675	13.688	13.0394	18.7711	3	53488652	53508502	+	protein_coding	Stoml3
ENSMUSG00000035365	31.0063	-0.672185	0.177509	-3.78678	0.000152614	0.00132101	10	88091431	88146941	-	protein_coding	Parpbp	ENSMUSG00000035365	32.5039	17.1468	36.7894	46.0264	49.37	38.1324	34.2307	33.0814	70.035	38.2982	27.2185	17.6534	29.3649	19.2756	21.0484	30.8037	9.22261	22.1114	22.0039	25.8103	10	88091431	88146941	-	protein_coding	Parpbp
ENSMUSG00000046145	3.87687	-0.672089	0.23316	-2.88252	0.0039451	0.0183775	4	59549153	59549625	+	pseudogene	1700018M17Rik	ENSMUSG00000046145	5.0006	4.89908	5.4102	8.76693	7.35298	4.14482	2.13942	5.29303	6.48472	5.31919	4.73366	2.20667	0.978832	2.75365	0.809555	1.28349	0.922261	1.05293	4.0748	3.91065	4	59549153	59549625	+	pseudogene	1700018M17Rik
ENSMUSG00000051832	17.0853	-0.671843	0.232944	-2.88414	0.00392486	0.0182999	11	83582055	83623693	+	lncRNA	E230016K23Rik	ENSMUSG00000051832	7.50091	7.34862	18.3947	21.9173	37.8153	33.9875	47.0672	17.2023	14.2664	44.6812	0	17.6534	22.5131	28.9133	1.61911	3.85046	3.68904	2.10585	5.70472	5.47491	11	83582055	83623693	+	lncRNA	E230016K23Rik
ENSMUSG00000105594	116.086	-0.671705	0.157448	-4.2662	1.99e-05	0.000248889	5	143395502	143398244	+	TEC	Gm43398	ENSMUSG00000105594	78.7595	71.0366	117.942	149.038	215.337	145.898	202.175	190.549	138.773	156.384	66.2712	117.505	104.735	82.6096	78.5268	78.9345	80.2367	56.858	79.8661	110.28	5	143395502	143398244	+	TEC	Gm43398
ENSMUSG00000114743	24.8256	-0.671522	0.186908	-3.59279	0.000327156	0.00245642	13	59235749	59255411	-	lncRNA	Gm34672	ENSMUSG00000114743	37.5045	24.4954	33.5433	17.5339	24.1598	38.9613	36.3701	35.7279	40.2053	29.7875	17.7512	18.7567	15.6613	17.8987	9.71466	11.5514	30.4346	13.688	32.5984	10.1677	13	59235749	59255411	-	lncRNA	Gm34672
ENSMUSG00000040701	1428.17	-0.671455	0.136216	-4.92935	8.25e-07	1.9e-05	14	55098574	55106593	-	protein_coding	Ap1g2	ENSMUSG00000040701	1193.89	908.779	1483.48	2283.79	2031.52	2551.55	1890.18	2129.12	1782	1614.91	737.267	1290.9	1414.41	1358.93	950.417	972.242	1012.64	1005.54	981.212	970.624	14	55098574	55106593	-	protein_coding	Ap1g2
ENSMUSG00000108276	18.4296	-0.670965	0.212303	-3.16041	0.00157547	0.00876604	6	135289358	135341684	+	lncRNA	Gm36640	ENSMUSG00000108276	10.0012	9.79816	19.4767	17.5339	22.0589	56.3696	35.3004	22.4954	29.8297	20.2129	10.6507	12.6884	19.5766	5.5073	10.5242	19.2523	9.22261	9.47633	11.4094	17.2069	6	135289358	135341684	+	lncRNA	Gm36640
ENSMUSG00000110661	55.1838	-0.670628	0.184183	-3.6411	0.000271479	0.00210793	8	95828597	95833675	-	lncRNA	Gm31805	ENSMUSG00000110661	46.2556	53.8899	32.4612	99.7239	103.992	102.792	79.1585	54.2535	68.7381	62.7664	35.5024	33.6517	60.6876	50.9426	26.7153	15.4018	36.8904	41.0641	44.8228	53.967	8	95828597	95833675	-	lncRNA	Gm31805
ENSMUSG00000096764	2.61676	-0.670548	0.219319	-3.0574	0.00223262	0.0116188	2	112266313	112406319	+	protein_coding	Gm21985	ENSMUSG00000096764	5.0006	2.44954	0	1.09587	3.15128	8.28964	2.13942	6.61629	10.3756	4.25535	0	3.31001	0.978832	1.37683	0.809555	0	0.922261	0	0	1.56426	2	112266313	112406319	+	protein_coding	Gm21985
ENSMUSG00000102323	16.1473	-0.670163	0.227069	-2.95136	0.00316377	0.0153442	2	156846369	156849715	-	TEC	Gm37790	ENSMUSG00000102323	11.2514	8.57339	19.4767	27.3967	19.9581	24.8689	38.5095	14.5558	28.5328	25.5321	14.201	4.41334	2.93649	15.1451	6.47644	1.92523	6.45583	10.5293	18.7441	23.4639	2	156846369	156849715	-	TEC	Gm37790
ENSMUSG00000001225	18.9396	-0.669943	0.224743	-2.98094	0.00287368	0.0141865	12	31390870	31473917	+	protein_coding	Slc26a3	ENSMUSG00000001225	7.50091	13.4725	24.8869	18.6297	61.9751	9.11861	48.1369	30.4349	16.8603	24.4683	17.7512	21.515	7.83065	16.5219	6.47644	12.1931	8.30035	16.8468	5.70472	10.1677	12	31390870	31473917	+	protein_coding	Slc26a3
ENSMUSG00000072621	12.523	-0.669859	0.228956	-2.92571	0.00343669	0.0163776	11	83028129	83040042	-	transcribed_unprocessed_pseudogene	Slfn10-ps	ENSMUSG00000072621	12.5015	0	11.9024	37.2595	12.6051	13.2634	19.2548	19.8489	23.345	21.2768	7.10049	12.6884	3.91533	16.5219	6.47644	6.41744	5.53356	8.4234	9.77952	2.34639	11	83028129	83040042	-	transcribed_unprocessed_pseudogene	Slfn10-ps
ENSMUSG00000116668	2.28914	-0.669797	0.224122	-2.98853	0.0028032	0.0139108	16	84892661	84893832	-	processed_pseudogene	Gm49568	ENSMUSG00000116668	5.0006	4.89908	8.65632	0	2.10085	3.31586	4.27884	1.32326	2.59389	4.25535	0	1.10334	0	2.75365	0.809555	1.28349	1.84452	0	0	1.56426	16	84892661	84893832	-	processed_pseudogene	Gm49568
ENSMUSG00000034391	16.7783	-0.669298	0.207493	-3.22564	0.00125691	0.00732593	18	84934781	84981473	+	protein_coding	Fbxo15	ENSMUSG00000034391	17.5021	12.2477	23.8049	21.9173	17.8572	29.0137	18.1851	14.5558	18.1572	46.8089	16.5678	17.6534	5.87299	5.5073	8.09555	8.98441	12.9117	6.31755	18.7441	14.8605	18	84934781	84981473	+	protein_coding	Fbxo15
ENSMUSG00000040562	90.7517	-0.669079	0.145977	-4.58345	4.57e-06	7.66e-05	3	107981701	107986453	-	protein_coding	Gstm2	ENSMUSG00000040562	97.5118	84.5091	119.024	117.258	146.009	129.318	128.365	84.6885	125.804	106.384	71.0049	63.4418	37.1956	63.334	76.0981	63.5326	35.0459	71.5989	101.055	93.8556	3	107981701	107986453	-	protein_coding	Gstm2
ENSMUSG00000086189	4.55446	-0.668685	0.211375	-3.1635	0.00155882	0.00869392	3	30686084	30692366	+	lncRNA	Gm15462	ENSMUSG00000086189	2.5003	6.12385	19.4767	2.19173	15.7564	1.65793	7.48797	2.64651	1.29694	18.0852	1.18341	0	0.978832	9.63778	0	1.28349	0	0	0	0.78213	3	30686084	30692366	+	lncRNA	Gm15462
ENSMUSG00000069713	54.8695	-0.668528	0.150388	-4.44537	8.77e-06	0.000129716	10	20310505	20312294	-	lncRNA	4933406P04Rik	ENSMUSG00000069713	42.5051	42.8669	72.4967	94.2445	76.6811	82.0675	63.1129	59.5466	71.332	82.9794	42.6029	53.5118	44.0474	42.6816	33.1917	28.2367	26.7456	56.858	47.2677	34.4137	10	20310505	20312294	-	lncRNA	4933406P04Rik
ENSMUSG00000103486	75.0721	-0.668494	0.124209	-5.38201	7.37e-08	2.7e-06	9	58554798	58555829	+	TEC	Gm10657	ENSMUSG00000103486	77.5094	63.688	102.794	103.011	107.143	84.5543	110.18	100.568	70.035	113.831	53.2537	60.6835	58.7299	72.9718	42.9064	51.9812	53.4911	47.3816	78.2361	48.4921	9	58554798	58555829	+	TEC	Gm10657
ENSMUSG00000103609	6.82315	-0.667874	0.232954	-2.86698	0.00414413	0.0191244	1	86638200	86640454	+	TEC	Gm37022	ENSMUSG00000103609	2.5003	11.0229	5.4102	6.5752	4.2017	12.4345	18.1851	17.2023	10.3756	8.5107	2.36683	10.4817	3.91533	8.26096	1.61911	2.56697	5.53356	2.10585	1.62992	1.56426	1	86638200	86640454	+	TEC	Gm37022
ENSMUSG00000018595	14.4739	-0.667851	0.203785	-3.27723	0.00104833	0.00633565	X	136757673	136780141	-	protein_coding	Glra4	ENSMUSG00000018595	13.7517	8.57339	18.3947	24.1091	23.1094	16.5793	23.5336	17.2023	18.1572	26.596	9.46732	14.3434	1.95766	6.88413	15.3815	12.1931	11.9894	4.2117	8.96456	14.0783	X	136757673	136780141	-	protein_coding	Glra4
ENSMUSG00000107942	3.60003	-0.667769	0.227348	-2.93721	0.0033118	0.0158936	6	14006006	14006355	+	processed_pseudogene	Gm44411	ENSMUSG00000107942	11.2514	8.57339	1.08204	10.9587	4.2017	4.14482	1.06971	2.64651	7.78167	4.25535	2.36683	0.551668	3.91533	0	0	0.641744	0	2.10585	4.88976	1.56426	6	14006006	14006355	+	processed_pseudogene	Gm44411
ENSMUSG00000039563	342.394	-0.667606	0.132433	-5.0411	4.63e-07	1.2e-05	5	36447610	36464853	-	lncRNA	2210406O10Rik	ENSMUSG00000039563	338.791	320.89	406.847	498.619	507.356	541.314	488.857	350.663	328.127	489.366	239.05	327.139	354.337	326.308	200.77	154.66	312.646	206.373	246.933	208.829	5	36447610	36464853	-	lncRNA	2210406O10Rik
ENSMUSG00000109397	14.1829	-0.667392	0.233252	-2.86125	0.00421974	0.0194003	8	4399237	4401011	+	TEC	Gm45117	ENSMUSG00000109397	5.0006	0	6.49224	36.1636	29.4119	32.3296	19.2548	27.7884	20.7511	28.7236	5.91707	9.37835	18.5978	12.3914	0	2.56697	8.30035	9.47633	4.0748	7.03917	8	4399237	4401011	+	TEC	Gm45117
ENSMUSG00000035944	875.113	-0.667323	0.102376	-6.51836	7.11e-11	1.02e-08	15	85832305	85858822	+	protein_coding	Ttc38	ENSMUSG00000035944	831.35	923.476	1017.12	1287.64	1299.38	1048.64	1030.13	771.459	1439.61	1192.56	519.519	707.79	745.87	810.95	658.168	749.557	670.484	549.627	637.299	611.626	15	85832305	85858822	+	protein_coding	Ttc38
ENSMUSG00000097930	9.59812	-0.667237	0.215422	-3.09735	0.00195256	0.0104088	19	22978229	23075924	-	lncRNA	C330002G04Rik	ENSMUSG00000097930	8.75106	14.6972	5.4102	13.1504	10.5043	7.46068	17.1153	7.93954	22.0481	20.2129	3.55024	4.96501	5.87299	5.5073	6.47644	8.34267	5.53356	11.5822	8.1496	4.69278	19	22978229	23075924	-	lncRNA	C330002G04Rik
ENSMUSG00000022245	50.2111	-0.667186	0.16622	-4.01387	5.97e-05	0.000612174	9	63138169	63148961	-	protein_coding	Skor1	ENSMUSG00000022245	35.0042	41.6422	44.3637	51.5057	73.5298	80.4095	89.8556	71.4559	64.8472	81.9155	21.3015	45.2368	48.9416	39.928	29.9535	21.1775	43.3463	41.0641	32.5984	46.1457	9	63138169	63148961	-	protein_coding	Skor1
ENSMUSG00000116180	824.658	-0.66695	0.105937	-6.29572	3.06e-10	3.31e-08	15	100600203	100602766	+	lncRNA	Gm49492	ENSMUSG00000116180	727.588	644.229	967.344	1115.59	1302.53	1328	1201.28	1012.29	814.481	1106.39	745.551	654.83	640.156	582.397	608.785	561.526	574.568	610.697	652.783	642.129	15	100600203	100602766	+	lncRNA	Gm49492
ENSMUSG00000090235	76.2736	-0.666454	0.148012	-4.50269	6.71e-06	0.000104542	19	42779031	42781454	+	lncRNA	Gm16244	ENSMUSG00000090235	75.0091	36.7431	84.3992	110.683	93.4879	148.385	109.11	120.416	97.2709	80.8517	53.2537	61.7868	56.7722	61.9572	66.3835	52.623	47.9576	45.2758	66.0117	57.0955	19	42779031	42781454	+	lncRNA	Gm16244
ENSMUSG00000059866	1537.59	-0.666096	0.109107	-6.10498	1.03e-09	8.61e-08	5	34496086	34513991	-	protein_coding	Tnip2	ENSMUSG00000059866	1332.66	1398.69	1684.74	2168.72	2026.27	2231.57	2210.02	1888.29	2182.76	1944.7	904.129	1236.29	1573.96	1301.1	990.085	964.541	1138.99	1013.97	1506.86	1053.53	5	34496086	34513991	-	protein_coding	Tnip2
ENSMUSG00000027202	11.1267	-0.665867	0.210398	-3.1648	0.0015519	0.00867272	2	125152504	125230002	+	protein_coding	Slc12a1	ENSMUSG00000027202	5.0006	14.6972	18.3947	16.438	11.5547	14.0924	16.0456	19.8489	18.1572	12.7661	5.91707	12.1367	3.91533	11.0146	6.47644	7.05918	6.45583	1.05293	9.77952	11.732	2	125152504	125230002	+	protein_coding	Slc12a1
ENSMUSG00000105957	241.201	-0.665749	0.112683	-5.90816	3.46e-09	2.27e-07	3	133307517	133310008	-	lncRNA	Gm43254	ENSMUSG00000105957	212.526	187.39	281.331	351.773	342.439	380.495	365.841	250.096	290.516	329.79	184.613	231.149	184.999	187.248	188.626	160.436	203.82	153.727	158.102	179.108	3	133307517	133310008	-	lncRNA	Gm43254
ENSMUSG00000112887	4.03656	-0.665324	0.230083	-2.89167	0.003832	0.0179133	12	32931479	32931732	-	processed_pseudogene	Gm47961	ENSMUSG00000112887	0	2.44954	1.08204	5.47933	14.706	7.46068	8.55767	9.2628	6.48472	6.38303	2.36683	4.41334	0	0	2.42866	1.28349	2.76678	0	3.25984	2.34639	12	32931479	32931732	-	processed_pseudogene	Gm47961
ENSMUSG00000009350	8.83444	-0.665303	0.229207	-2.90263	0.00370041	0.0174097	11	87793580	87804413	+	protein_coding	Mpo	ENSMUSG00000009350	8.75106	6.12385	6.49224	9.8628	5.25213	7.46068	16.0456	5.29303	23.345	31.9151	2.36683	4.41334	6.85182	8.26096	6.47644	3.20872	7.37809	8.4234	4.0748	4.69278	11	87793580	87804413	+	protein_coding	Mpo
ENSMUSG00000090145	18.3917	-0.665161	0.193573	-3.43622	0.000589882	0.00396189	1	88103251	88219003	+	protein_coding	Ugt1a6b	ENSMUSG00000090145	7.50091	2.44954	23.8049	17.5339	1.05043	145.069	45.9975	10.5861	38.9083	53.1919	2.36683	7.72335	7.83065	1.37683	0	0	0	0	2.44488	0	1	88103251	88219003	+	protein_coding	Ugt1a6b
ENSMUSG00000046056	657.327	-0.66489	0.140632	-4.72786	2.27e-06	4.34e-05	7	30751470	30756134	+	protein_coding	Sbsn	ENSMUSG00000046056	462.556	504.605	531.282	990.664	991.602	1171.33	910.323	930.25	885.813	841.496	382.243	612.351	633.304	618.195	372.395	431.252	492.487	503.298	398.515	482.574	7	30751470	30756134	+	protein_coding	Sbsn
ENSMUSG00000110630	138.952	-0.664731	0.108261	-6.14009	8.25e-10	7.39e-08	8	104442270	104443786	+	lncRNA	K230015D01Rik	ENSMUSG00000110630	151.268	154.321	147.158	234.515	158.614	187.346	182.92	133.649	188.057	185.108	108.874	142.882	108.65	97.7546	81.765	99.4703	106.982	117.928	81.496	110.28	8	104442270	104443786	+	lncRNA	K230015D01Rik
ENSMUSG00000051596	3.52654	-0.664709	0.212345	-3.13033	0.00174612	0.00951519	5	38275971	38304217	+	protein_coding	Otop1	ENSMUSG00000051596	2.5003	2.44954	12.9845	1.09587	0	9.11861	13.9062	5.29303	2.59389	10.6384	0	3.86168	1.95766	0	0	2.56697	0	0	0	1.56426	5	38275971	38304217	+	protein_coding	Otop1
ENSMUSG00000066475	27.9642	-0.664695	0.181347	-3.66532	0.000247027	0.00195327	18	38244827	38245382	+	processed_pseudogene	Gm10268	ENSMUSG00000066475	26.2532	17.1468	27.051	24.1091	58.8238	38.1324	42.7884	43.6675	32.4236	45.745	21.3015	17.6534	21.5343	22.0292	25.9058	24.3863	23.9788	14.741	8.1496	23.4639	18	38244827	38245382	+	processed_pseudogene	Gm10268
ENSMUSG00000112352	30.9487	-0.664312	0.183374	-3.62272	0.000291525	0.00223318	10	25298608	25306432	+	lncRNA	Gm40617	ENSMUSG00000112352	28.7535	19.5963	42.1996	41.6429	36.7649	53.0537	42.7884	58.2233	32.4236	40.4258	17.7512	17.6534	11.746	16.5219	24.2866	26.3115	16.6007	30.5348	17.1142	44.5814	10	25298608	25306432	+	lncRNA	Gm40617
ENSMUSG00000097885	501.339	-0.664264	0.199052	-3.33713	0.00084647	0.00531812	3	51560034	51567117	+	lncRNA	5031434O11Rik	ENSMUSG00000097885	496.31	478.885	824.515	680.533	965.341	917.663	333.749	554.445	614.752	619.154	158.578	415.958	537.379	458.483	388.586	382.479	135.572	157.939	484.901	421.568	3	51560034	51567117	+	lncRNA	5031434O11Rik
ENSMUSG00000102144	5.96833	-0.664247	0.23353	-2.84437	0.00444993	0.020222	9	107351275	107353986	-	lncRNA	4930429P21Rik	ENSMUSG00000102144	2.5003	8.57339	9.73836	5.47933	6.30255	8.28964	5.34855	7.93954	23.345	8.5107	5.91707	6.62001	0	0	0.809555	1.28349	4.6113	5.26463	5.70472	3.12852	9	107351275	107353986	-	lncRNA	4930429P21Rik
ENSMUSG00000097121	253.156	-0.664163	0.102996	-6.44843	1.13e-10	1.51e-08	12	101082450	101088927	+	lncRNA	D130020L05Rik	ENSMUSG00000097121	295.036	210.66	327.858	395.608	376.052	332.415	362.631	301.703	247.716	280.853	202.364	217.357	220.237	234.06	182.959	165.57	160.473	158.992	181.736	208.829	12	101082450	101088927	+	lncRNA	D130020L05Rik
ENSMUSG00000109710	16.7004	-0.664111	0.227296	-2.92179	0.00348026	0.0165621	7	139887476	139888351	-	processed_pseudogene	Gm4974	ENSMUSG00000109710	20.0024	20.8211	19.4767	25.2049	33.6136	10.7765	42.7884	7.93954	14.2664	31.9151	2.36683	7.72335	13.7036	16.5219	13.7624	5.77569	14.7562	0	13.0394	19.5533	7	139887476	139888351	-	processed_pseudogene	Gm4974
ENSMUSG00000066170	106.921	-0.663268	0.168002	-3.94797	7.88e-05	0.000765635	17	28522719	28525398	+	lncRNA	E230001N04Rik	ENSMUSG00000066170	97.5118	85.7339	138.501	129.312	197.48	145.898	151.899	91.3047	115.428	195.746	69.8215	88.2669	80.2642	151.451	42.0968	53.9065	86.6925	51.5933	70.0865	95.4199	17	28522719	28525398	+	lncRNA	E230001N04Rik
ENSMUSG00000113440	138.964	-0.663258	0.133701	-4.96074	7.02e-07	1.67e-05	13	23441821	23445935	-	lncRNA	Gm46404	ENSMUSG00000113440	132.516	124.926	142.829	219.173	193.278	212.215	241.754	169.377	103.756	192.555	120.708	114.747	97.8832	93.6242	111.719	82.1432	125.427	69.4931	107.575	123.577	13	23441821	23445935	-	lncRNA	Gm46404
ENSMUSG00000020330	134.396	-0.663136	0.132035	-5.02242	5.1e-07	1.3e-05	11	40701394	40733422	-	protein_coding	Hmmr	ENSMUSG00000020330	130.016	100.431	119.024	202.735	130.253	191.491	232.127	141.589	197.136	228.725	120.708	89.9219	97.8832	99.1315	83.3841	96.2615	118.049	89.4986	110.835	108.716	11	40701394	40733422	-	protein_coding	Hmmr
ENSMUSG00000040891	3.60784	-0.663075	0.222351	-2.98212	0.00286263	0.0141473	7	19013283	19023538	-	protein_coding	Foxa3	ENSMUSG00000040891	5.0006	0	4.32816	5.47933	2.10085	6.63171	11.7668	5.29303	7.78167	8.5107	2.36683	0	3.91533	5.5073	0	0	1.84452	0	1.62992	0	7	19013283	19023538	-	protein_coding	Foxa3
ENSMUSG00000087406	29.0719	-0.66299	0.196022	-3.38222	0.000719014	0.00465771	2	150667493	150668935	+	lncRNA	E130215H24Rik	ENSMUSG00000087406	27.5033	24.4954	40.0355	28.4925	47.2691	43.9351	34.2307	48.9605	53.1747	24.4683	29.5854	15.4467	25.4496	41.3048	8.9051	30.1619	11.9894	17.8997	18.7441	9.38556	2	150667493	150668935	+	lncRNA	E130215H24Rik
ENSMUSG00000109383	37.721	-0.662702	0.149883	-4.42146	9.8e-06	0.000141187	7	82852497	82867074	-	lncRNA	Gm36584	ENSMUSG00000109383	36.2544	47.766	44.3637	51.5057	73.5298	46.422	50.2763	37.0512	37.6114	46.8089	31.9522	27.0317	43.0686	27.5365	16.1911	31.4454	20.2897	29.4819	26.8937	28.9388	7	82852497	82867074	-	lncRNA	Gm36584
ENSMUSG00000031980	1534.33	-0.662688	0.223056	-2.97095	0.00296883	0.0145508	8	124556533	124569706	-	protein_coding	Agt	ENSMUSG00000031980	926.362	792.426	2607.72	1618.6	5445.41	2561.5	2094.49	1115.51	1922.07	1487.25	699.398	1453.64	2073.17	1674.22	499.495	496.71	917.649	665.449	856.523	779.002	8	124556533	124569706	-	protein_coding	Agt
ENSMUSG00000086637	3.26099	-0.662621	0.227997	-2.90627	0.00365771	0.0172511	2	129493569	129515807	-	lncRNA	Gm14040	ENSMUSG00000086637	2.5003	0	5.4102	2.19173	7.35298	10.7765	6.41826	5.29303	1.29694	8.5107	1.18341	0.551668	0	2.75365	0	0.641744	1.84452	2.10585	3.25984	3.12852	2	129493569	129515807	-	lncRNA	Gm14040
ENSMUSG00000118267	6.83484	-0.662518	0.228651	-2.89751	0.00376139	0.0176505	18	47922840	48107980	+	lncRNA	G630055G22Rik	ENSMUSG00000118267	20.0024	4.89908	8.65632	14.2463	2.10085	6.63171	11.7668	3.96977	10.3756	22.3406	4.73366	3.31001	0	0	0	1.92523	3.68904	6.31755	0	11.732	18	47922840	48107980	+	lncRNA	G630055G22Rik
ENSMUSG00000061544	281.801	-0.661987	0.146297	-4.52494	6.04e-06	9.59e-05	17	21730794	21769342	+	protein_coding	Zfp229	ENSMUSG00000061544	207.525	225.358	357.073	512.866	452.733	494.892	453.557	313.612	197.136	312.768	156.211	226.735	248.623	228.553	190.245	205.358	183.53	205.32	197.22	266.706	17	21730794	21769342	+	protein_coding	Zfp229
ENSMUSG00000084772	4.31958	-0.66166	0.232463	-2.8463	0.00442311	0.020124	6	17058805	17064996	-	lncRNA	Gm15473	ENSMUSG00000084772	6.25075	2.44954	9.73836	6.5752	8.4034	9.11861	3.20913	6.61629	2.59389	5.31919	3.55024	2.20667	3.91533	2.75365	3.23822	4.49221	2.76678	0	1.62992	1.56426	6	17058805	17064996	-	lncRNA	Gm15473
ENSMUSG00000074151	97.206	-0.661633	0.16556	-3.99633	6.43e-05	0.000649819	8	94434355	94527272	+	protein_coding	Nlrc5	ENSMUSG00000074151	91.261	72.2614	101.712	169.859	155.463	154.187	126.226	83.3652	137.476	134.044	49.7034	67.8551	79.2854	96.3778	55.0497	40.4298	56.2579	56.858	92.0905	124.359	8	94434355	94527272	+	protein_coding	Nlrc5
ENSMUSG00000027075	83.176	-0.661358	0.152182	-4.34585	1.39e-05	0.00018739	2	84838849	84863594	+	protein_coding	Slc43a1	ENSMUSG00000027075	71.2586	90.6329	80.071	90.9569	120.799	113.568	83.4373	132.326	160.821	100.001	37.8693	71.1652	90.0525	67.4645	41.2873	37.8629	68.2473	69.4931	61.122	75.0845	2	84838849	84863594	+	protein_coding	Slc43a1
ENSMUSG00000022510	75.359	-0.660892	0.160596	-4.11525	3.87e-05	0.000429	16	25683762	25892102	+	protein_coding	Trp63	ENSMUSG00000022510	107.513	117.578	108.204	94.2445	58.8238	124.345	108.041	59.5466	95.9739	73.4048	87.5727	49.0984	84.1795	38.5511	44.5255	39.7881	33.2014	48.4346	68.4566	65.6989	16	25683762	25892102	+	protein_coding	Trp63
ENSMUSG00000103998	4.62389	-0.660813	0.233459	-2.83053	0.00464711	0.0209588	3	31341011	31345280	+	lncRNA	Gm38025	ENSMUSG00000103998	6.25075	3.67431	5.4102	9.8628	5.25213	9.11861	12.8365	2.64651	5.18778	5.31919	0	1.10334	1.95766	1.37683	3.23822	0.641744	2.76678	6.31755	3.25984	6.25704	3	31341011	31345280	+	lncRNA	Gm38025
ENSMUSG00000085829	387.074	-0.660691	0.104364	-6.33061	2.44e-10	2.81e-08	14	75843378	75844964	-	lncRNA	Gm4285	ENSMUSG00000085829	348.792	334.362	438.226	563.276	513.658	489.089	605.455	385.068	508.402	600.005	292.303	311.141	384.681	287.757	240.438	281.084	291.434	290.607	273.012	302.684	14	75843378	75844964	-	lncRNA	Gm4285
ENSMUSG00000058057	78.2537	-0.660598	0.181537	-3.63892	0.000273786	0.00212262	15	100334928	100340375	+	protein_coding	Mettl7a3	ENSMUSG00000058057	65.0078	64.9128	74.6608	99.7239	97.6896	86.2123	93.0647	148.205	133.585	132.98	54.4371	76.6818	70.4759	66.0876	19.4293	25.6697	80.2367	76.8635	53.7873	45.3636	15	100334928	100340375	+	protein_coding	Mettl7a3
ENSMUSG00000106224	39.7019	-0.660508	0.179504	-3.67964	0.000233566	0.00187042	3	121721594	121723402	-	TEC	Gm43823	ENSMUSG00000106224	27.5033	57.5642	49.7739	41.6429	47.2691	57.1985	73.8099	39.6977	63.5503	45.745	29.5854	35.3067	40.1321	39.928	10.5242	16.0436	20.2897	25.2702	30.9685	42.235	3	121721594	121723402	-	TEC	Gm43823
ENSMUSG00000025927	86.4108	-0.660151	0.149066	-4.42859	9.48e-06	0.000137897	1	19208913	19238576	+	protein_coding	Tfap2b	ENSMUSG00000025927	142.517	112.679	134.173	85.4776	58.8238	97.8178	119.807	117.77	112.834	105.32	47.3366	63.4418	49.9204	41.3048	68.8122	102.679	57.1802	61.0697	93.7204	55.5313	1	19208913	19238576	+	protein_coding	Tfap2b
ENSMUSG00000079173	82.0345	-0.660055	0.194063	-3.40124	0.00067081	0.00440011	5	137378636	137477064	-	protein_coding	Zan	ENSMUSG00000079173	43.7553	44.0917	164.47	123.833	203.783	77.9226	89.8556	70.1326	120.616	114.895	35.5024	53.5118	37.1956	112.9	70.4313	60.9656	47.9576	52.6463	50.5275	65.6989	5	137378636	137477064	-	protein_coding	Zan
ENSMUSG00000117628	110.662	-0.659853	0.177959	-3.70788	0.000208998	0.00170896	17	86970371	86975288	+	lncRNA	Gm50012	ENSMUSG00000117628	103.763	72.2614	185.029	143.559	162.816	123.516	143.341	162.761	140.07	168.086	63.9044	124.677	123.333	114.277	28.3344	41.0716	94.9929	67.3872	74.9763	75.0845	17	86970371	86975288	+	lncRNA	Gm50012
ENSMUSG00000053861	149.878	-0.659693	0.133015	-4.95953	7.07e-07	1.68e-05	18	74065101	74065584	+	protein_coding	Gm9925	ENSMUSG00000053861	138.767	124.926	208.834	192.873	248.951	189.004	195.757	183.933	168.603	212.768	104.14	147.295	160.528	144.567	82.5746	73.1588	96.8374	112.663	121.429	89.945	18	74065101	74065584	+	protein_coding	Gm9925
ENSMUSG00000029830	12.7868	-0.659675	0.198745	-3.31921	0.000902741	0.00560457	6	37983738	38046996	-	protein_coding	Svopl	ENSMUSG00000029830	10.0012	14.6972	8.65632	15.3421	16.8068	24.04	16.0456	19.8489	18.1572	20.2129	10.6507	9.93002	14.6825	13.7683	5.66688	6.41744	5.53356	5.26463	11.4094	8.60343	6	37983738	38046996	-	protein_coding	Svopl
ENSMUSG00000068303	6.16811	-0.659603	0.228803	-2.88285	0.003941	0.018364	6	85152620	85156223	+	transcribed_unprocessed_pseudogene	Spr-ps1	ENSMUSG00000068303	8.75106	11.0229	7.57428	8.76693	5.25213	4.97378	12.8365	13.2326	5.18778	6.38303	1.18341	5.51668	8.80948	8.26096	1.61911	2.56697	1.84452	3.15878	4.0748	2.34639	6	85152620	85156223	+	transcribed_unprocessed_pseudogene	Spr-ps1
ENSMUSG00000084348	7.81386	-0.659551	0.227949	-2.89341	0.00381087	0.0178362	X	47586017	47587570	+	processed_pseudogene	Gm14608	ENSMUSG00000084348	2.5003	2.44954	4.32816	13.1504	11.5547	14.9214	12.8365	15.8791	15.5633	12.7661	7.10049	5.51668	5.87299	2.75365	3.23822	1.28349	5.53356	6.31755	4.88976	7.8213	X	47586017	47587570	+	processed_pseudogene	Gm14608
ENSMUSG00000034035	211.737	-0.659392	0.116406	-5.66458	1.47e-08	7.49e-07	4	116596653	116600266	+	protein_coding	Ccdc17	ENSMUSG00000034035	195.024	188.614	282.413	303.555	292.018	270.242	374.398	205.105	236.044	275.534	197.63	161.087	181.084	147.32	154.625	118.081	161.396	127.404	200.48	162.683	4	116596653	116600266	+	protein_coding	Ccdc17
ENSMUSG00000115016	8.63198	-0.659241	0.225104	-2.9286	0.00340488	0.0162639	14	123043281	123265002	+	lncRNA	AA536875	ENSMUSG00000115016	25.003	8.57339	9.73836	8.76693	8.4034	14.9214	13.9062	6.61629	12.9694	6.38303	5.91707	7.17168	3.91533	13.7683	4.04777	1.28349	3.68904	3.15878	8.1496	6.25704	14	123043281	123265002	+	lncRNA	AA536875
ENSMUSG00000065843	5.74089	-0.659044	0.230411	-2.8603	0.00423242	0.0194528	13	31737632	31737740	-	snRNA	Gm25186	ENSMUSG00000065843	7.50091	6.12385	6.49224	7.67107	13.6555	8.28964	7.48797	7.93954	5.18778	7.44687	8.2839	2.20667	1.95766	5.5073	0.809555	1.28349	2.76678	3.15878	2.44488	8.60343	13	31737632	31737740	-	snRNA	Gm25186
ENSMUSG00000006777	43.0977	-0.658965	0.196541	-3.3528	0.000799978	0.00508861	11	99477973	99493137	-	protein_coding	Krt23	ENSMUSG00000006777	36.2544	23.2706	28.1331	98.628	46.2187	78.7516	49.2066	54.2535	68.7381	70.2133	48.52	18.7567	29.3649	17.8987	21.858	17.3271	32.2791	47.3816	34.2283	40.6708	11	99477973	99493137	-	protein_coding	Krt23
ENSMUSG00000111777	19.7557	-0.657851	0.196885	-3.34129	0.000833902	0.00526181	9	98575307	98576766	-	processed_pseudogene	Gm47147	ENSMUSG00000111777	17.5021	7.34862	12.9845	25.2049	40.9666	23.211	25.673	27.7884	46.69	26.596	14.201	10.4817	14.6825	16.5219	12.1433	13.4766	9.22261	16.8468	17.9291	15.6426	9	98575307	98576766	-	processed_pseudogene	Gm47147
ENSMUSG00000097413	96.6707	-0.657739	0.129239	-5.08932	3.59e-07	9.72e-06	18	32359052	32378278	-	lncRNA	A830052D11Rik	ENSMUSG00000097413	110.013	88.1834	108.204	144.654	143.908	126.832	97.3435	111.154	110.24	159.576	93.4897	81.0952	100.82	66.0876	52.6211	77.0092	77.4699	80.0223	55.4173	49.2742	18	32359052	32378278	-	lncRNA	A830052D11Rik
ENSMUSG00000098528	2.08672	-0.657421	0.204621	-3.21287	0.00131416	0.00759046	15	59306947	59312013	+	transcribed_processed_pseudogene	Zfp572	ENSMUSG00000098528	5.0006	7.34862	0	2.19173	6.30255	3.31586	4.27884	5.29303	0	3.19151	2.36683	0	0	0	0	0	0	0	2.44488	0	15	59306947	59312013	+	transcribed_processed_pseudogene	Zfp572
ENSMUSG00000111613	2.76443	-0.657416	0.221294	-2.97078	0.00297041	0.0145538	9	17732669	17733931	+	processed_pseudogene	Gm4977	ENSMUSG00000111613	2.5003	0	8.65632	8.76693	0	6.63171	2.13942	2.64651	2.59389	10.6384	2.36683	1.10334	1.95766	0	0.809555	1.28349	0	0	1.62992	1.56426	9	17732669	17733931	+	processed_pseudogene	Gm4977
ENSMUSG00000112895	2.56892	-0.657325	0.199194	-3.29993	0.000967076	0.00592049	12	98277516	98281040	+	TEC	Gm47567	ENSMUSG00000112895	0	0	0	8.76693	4.2017	4.97378	12.8365	2.64651	5.18778	8.5107	0	1.655	1.95766	0	0	0.641744	0	0	0	0	12	98277516	98281040	+	TEC	Gm47567
ENSMUSG00000037716	63.1746	-0.657229	0.142642	-4.60754	4.07e-06	6.98e-05	9	58028676	58118823	-	protein_coding	Ccdc33	ENSMUSG00000037716	63.7577	69.8119	60.5943	83.2859	105.043	68.804	99.483	108.507	54.4717	74.4687	66.2712	52.9601	46.9839	45.4353	31.5726	35.9376	37.8127	43.1699	61.9369	53.1849	9	58028676	58118823	-	protein_coding	Ccdc33
ENSMUSG00000111236	56.9826	-0.657186	0.177517	-3.7021	0.000213824	0.00174099	9	46830338	46837616	+	lncRNA	Gm31614	ENSMUSG00000111236	80.0097	86.9586	95.2196	46.0264	31.5128	38.9613	116.598	66.1629	71.332	91.4901	54.4371	62.8901	48.9416	39.928	39.6682	30.8037	34.1236	27.3761	33.4134	43.7993	9	46830338	46837616	+	lncRNA	Gm31614
ENSMUSG00000020892	498.323	-0.657118	0.196354	-3.3466	0.000818098	0.00518343	11	69125895	69149115	+	protein_coding	Aloxe3	ENSMUSG00000020892	343.791	368.656	523.708	552.317	1202.74	695.501	602.246	586.203	958.442	579.792	231.949	385.064	690.076	553.484	212.103	205.358	319.102	257.967	376.511	321.456	11	69125895	69149115	+	protein_coding	Aloxe3
ENSMUSG00000086825	84.1778	-0.656906	0.185522	-3.54086	0.000398832	0.00288143	1	130429780	130437191	-	lncRNA	Gm15675	ENSMUSG00000086825	48.7559	50.2155	63.8404	141.367	144.959	163.306	127.295	82.0419	110.24	141.49	24.8517	79.4402	77.3277	70.2181	40.4777	60.9656	69.1696	74.7577	44.0078	68.8275	1	130429780	130437191	-	lncRNA	Gm15675
ENSMUSG00000098434	4.28157	-0.656529	0.233383	-2.8131	0.00490668	0.021895	8	86885687	86886566	+	lncRNA	2010110E17Rik	ENSMUSG00000098434	0	4.89908	6.49224	2.19173	6.30255	10.7765	9.62738	5.29303	6.48472	8.5107	4.73366	2.75834	1.95766	0	4.04777	2.56697	3.68904	2.10585	1.62992	1.56426	8	86885687	86886566	+	lncRNA	2010110E17Rik
ENSMUSG00000068323	45.1949	-0.656041	0.232959	-2.81613	0.00486067	0.0217182	6	83219827	83304945	+	protein_coding	Slc4a5	ENSMUSG00000068323	15.0018	46.5412	67.0865	23.0132	221.64	23.211	127.295	31.7582	72.6289	29.7875	10.6507	20.4117	13.7036	95.001	17.8102	14.7601	12.9117	27.3761	11.4094	21.8996	6	83219827	83304945	+	protein_coding	Slc4a5
ENSMUSG00000105881	397.272	-0.656025	0.124087	-5.28681	1.24e-07	4.15e-06	5	123138930	123141569	+	lncRNA	4932422M17Rik	ENSMUSG00000105881	325.039	255.977	412.257	510.674	700.634	659.855	487.787	525.333	490.245	560.643	299.404	305.624	346.506	327.685	250.152	278.517	277.6	308.507	321.094	301.902	5	123138930	123141569	+	lncRNA	4932422M17Rik
ENSMUSG00000027456	258.14	-0.655884	0.137359	-4.77496	1.8e-06	3.57e-05	2	151572621	151590005	+	protein_coding	Sdcbp2	ENSMUSG00000027456	215.026	194.738	242.377	355.061	384.456	405.363	372.259	348.017	341.097	356.386	137.276	242.182	277.009	256.09	142.482	147.601	197.364	182.156	170.327	195.533	2	151572621	151590005	+	protein_coding	Sdcbp2
ENSMUSG00000019178	12.3356	-0.655675	0.228325	-2.87167	0.00408309	0.0188997	5	135747219	135778385	-	protein_coding	Styxl1	ENSMUSG00000019178	12.5015	2.44954	9.73836	5.47933	28.3615	11.6055	28.8822	35.7279	9.07861	24.4683	9.46732	7.17168	9.78832	2.75365	9.71466	7.70092	4.6113	6.31755	13.8543	7.03917	5	135747219	135778385	-	protein_coding	Styxl1
ENSMUSG00000113737	8.3914	-0.655393	0.233277	-2.80951	0.00496175	0.0220765	13	52729614	52757205	-	lncRNA	BB123696	ENSMUSG00000113737	0	7.34862	4.32816	4.38347	34.664	29.8427	11.7668	7.93954	12.9694	7.44687	8.2839	3.31001	7.83065	5.5073	4.85733	2.56697	0.922261	4.2117	6.51968	3.12852	13	52729614	52757205	-	lncRNA	BB123696
ENSMUSG00000036850	5968.62	-0.655098	0.105288	-6.22193	4.91e-10	4.87e-08	2	24974116	24975098	-	protein_coding	Mrpl41	ENSMUSG00000036850	5616.93	6524.35	6560.41	8346.12	7328.82	7821.28	7477.27	6523.66	9957.94	7577.72	3943.14	5123.89	5681.14	5570.64	3460.04	3201.66	5529.88	4242.24	4627.34	4257.92	2	24974116	24975098	-	protein_coding	Mrpl41
ENSMUSG00000098184	3.4633	-0.654851	0.219148	-2.98816	0.00280658	0.0139183	8	121949673	121950645	-	lncRNA	Gm27011	ENSMUSG00000098184	1.25015	0	5.4102	18.6297	2.10085	6.63171	3.20913	6.61629	9.07861	3.19151	0	0	2.93649	2.75365	0.809555	2.56697	0.922261	3.15878	0	0	8	121949673	121950645	-	lncRNA	Gm27011
ENSMUSG00000024371	124.452	-0.654603	0.119787	-5.46473	4.64e-08	1.9e-06	17	34862603	34898265	-	protein_coding	C2	ENSMUSG00000024371	103.763	112.679	142.829	178.626	168.068	222.991	166.875	162.761	121.913	159.576	76.9219	83.3018	99.8408	107.392	85.0032	99.4703	82.0812	89.4986	101.87	123.577	17	34862603	34898265	-	protein_coding	C2
ENSMUSG00000010342	34.5838	-0.654589	0.166799	-3.92443	8.69e-05	0.000832862	11	87405064	87555823	+	protein_coding	Tex14	ENSMUSG00000010342	37.5045	25.7202	25.969	53.6975	38.8657	58.0275	57.7643	46.314	46.69	43.6174	16.5678	24.8251	30.3438	35.7975	15.3815	19.8941	18.4452	34.7465	31.7834	29.721	11	87405064	87555823	+	protein_coding	Tex14
ENSMUSG00000035683	115.122	-0.654488	0.159194	-4.11127	3.93e-05	0.000434733	4	44300875	44364675	+	protein_coding	Melk	ENSMUSG00000035683	132.516	126.151	96.3016	146.846	111.345	165.793	202.175	197.165	92.0831	176.597	99.4068	87.1635	42.0898	56.4499	89.8606	62.8909	99.6042	83.1811	140.173	94.6378	4	44300875	44364675	+	protein_coding	Melk
ENSMUSG00000082512	4.15633	-0.654099	0.232627	-2.8118	0.00492658	0.0219647	2	110209177	110210165	-	processed_pseudogene	Gm13937	ENSMUSG00000082512	5.0006	8.57339	3.24612	1.09587	12.6051	7.46068	8.55767	1.32326	5.18778	8.5107	0	2.20667	0	2.75365	3.23822	5.13395	1.84452	0	3.25984	3.12852	2	110209177	110210165	-	processed_pseudogene	Gm13937
ENSMUSG00000105542	11.8953	-0.65391	0.225031	-2.90587	0.00366234	0.0172623	5	146199984	146200458	-	processed_pseudogene	Gm34248	ENSMUSG00000105542	17.5021	17.1468	6.49224	10.9587	18.9077	18.2372	11.7668	11.9093	36.3145	10.6384	11.8341	6.62001	3.91533	2.75365	5.66688	2.56697	19.3675	8.4234	11.4094	5.47491	5	146199984	146200458	-	processed_pseudogene	Gm34248
ENSMUSG00000059741	5.74022	-0.653892	0.23334	-2.80231	0.00507377	0.0224381	9	110741860	110769798	+	protein_coding	Myl3	ENSMUSG00000059741	13.7517	1.22477	11.9024	17.5339	10.5043	1.65793	9.62738	3.96977	6.48472	6.38303	2.36683	2.20667	2.93649	2.75365	1.61911	3.85046	0	6.31755	8.1496	1.56426	9	110741860	110769798	+	protein_coding	Myl3
ENSMUSG00000108095	54.6124	-0.653781	0.195301	-3.34755	0.000815281	0.00517288	6	128843785	128846959	-	lncRNA	Gm44067	ENSMUSG00000108095	42.5051	51.4403	55.1841	88.7652	48.3196	53.8827	104.832	76.7489	89.4892	88.2986	35.5024	48.5468	55.7934	85.3632	31.5726	17.3271	45.1908	15.7939	34.2283	23.4639	6	128843785	128846959	-	lncRNA	Gm44067
ENSMUSG00000049908	6.38944	-0.653699	0.226546	-2.88551	0.00390784	0.0182372	3	96913565	96926020	-	protein_coding	Gja8	ENSMUSG00000049908	12.5015	9.79816	9.73836	6.5752	8.4034	8.28964	6.41826	2.64651	7.78167	13.8299	3.55024	1.10334	8.80948	4.13048	4.04777	6.41744	3.68904	2.10585	3.25984	4.69278	3	96913565	96926020	-	protein_coding	Gja8
[truncated: 7,326 more rows]
